# Supplementary material for: Developmental Stage- and Genotype-Dependent Regulation of Specialized Metabolite Accumulation in Fruit Tissues of Different Citrus Varieties
Source: MDPI journal article supplement (doi:10.3390/ijms20051245), 2019-03-12
Supplement: s1 [file s1]

**Supplementary Table S1.** List of genotypes included in this study

| Cultivar name | Plant species                                                                                        | Fruit type   | Harvesting period (Days after Full Bloom) | TSS (°Brix) | TA (%) |
|---------------|------------------------------------------------------------------------------------------------------|--------------|-------------------------------------------|-------------|--------|
| Wase          | <i>Citrus unshiu</i> cv. Wase                                                                        | Mandarin     | 20, 80, 110, 200                          | 13.80       | 0.94   |
| Thomson       | <i>Citrus sinensis</i> cv. Thomson navel                                                             | Navel orange | 20, 80, 110, 200                          | 11.80       | 1.52   |
| Duncan        | <i>Citrus paradisi</i> cv. Duncan                                                                    | Grapefruit   | 20, 80, 110, 200                          | 11.10       | 2.78   |
| Moro          | <i>Citrus sinensis</i> cv. Moro                                                                      | Blood orange | 20, 80, 110, 200                          | 11.20       | 1.45   |
| Aurantium     | <i>Citrus aurantium</i> L.                                                                           | Sour orange  | 20, 80, 110, 200                          | 9.70        | 5.60   |
| Palestine     | <i>Citrus limettioides</i> cv. Palestine                                                             | Lime         | 20, 80, 110, 200                          | 9.80        | 0.11   |
| Bakraei       | <i>Citrus reticulata</i> Blanco ×<br><i>Citrus limettioides</i> Tan.                                 | Mandarin     | 20, 80, 110, 200                          | 7.80        | 0.07   |
| Page          | ( <i>Citrus paradisi</i> cv. Duncan × <i>Citrus reticulata</i> cv. Dancy) × <i>Citrus clementina</i> | Mandarin     | 20, 80, 110, 200                          | 12.80       | 1.47   |

**Supplementary Table S2.** Identification of metabolites as extracted from PLS-DA. VIP: Variable Importance; ID level: a) co-injection with standard, b) mass spectrometry data matches those in databases (metlin or HMDB), c) tentatively annotated based on mass spectrometry data and database search (See Material and Methods section for details). (\*) p-value after one-way ANOVA using genotype as factor.

| Annotation    | Positive electrospray (ESI+) |                                                                    |          |                                                 |      | Negative electrospray (ESI-) |                                            |          |                                                 |      | ID level | <i>p-value*</i> |
|---------------|------------------------------|--------------------------------------------------------------------|----------|-------------------------------------------------|------|------------------------------|--------------------------------------------|----------|-------------------------------------------------|------|----------|-----------------|
|               | mz precursor                 | MS/MS                                                              | Rt [min] | Fragment annotation                             | VIP  | mz                           | MS/MS                                      | Rt [min] | Fragment annotation                             | VIP  |          |                 |
| Naringenin    | 273.0700                     | 153.0300                                                           | 9.03     | [M-C8H8O]+                                      | -    | 271.0624                     | 151.0055<br>119.0604                       | 9.03     | [M-C8H7O]-<br>[M-C7H3O4]-                       | 1.33 | a        | <0.001          |
| Myricetin     | 319.054                      | 153.041                                                            | 7.30     | [M-C4H6O7]+                                     | 1.20 | 317.0342                     | 179.99<br>151.0136<br>137.0183<br>109.0171 | 7.27     | [M-C6H7O4]-<br>[M-C2H4]-<br>[M-O]-<br>[M-CHO2]- | 1.44 | a        | <0.001          |
| Nobiletin     | 403.1396                     | 388.1245<br>358.0729<br>330.0801<br>301.0784<br>211.043<br>183.049 | 10.96    | [M-CH3]+<br>[M-C2H6]+<br>[M-CO]+<br>-<br>-<br>- | 1.34 | nd                           |                                            |          |                                                 |      | a        | <0.001          |
| Diosmin       | 609.1805                     | 303.0976<br>177.0500<br>153.0200                                   | 7.72     | [M-Hexose]+<br>[M-C6H3O3]+<br>[M-C9H10O2]+      | 1.03 | 607.1660                     |                                            | 6.89     | [M-H]-                                          | 0.95 | a        | <0.001          |
| Isosinensetin | 373.1289                     | 343.1197                                                           | 9.75     | [M-C2H6]+                                       | -    | nd                           |                                            |          |                                                 |      | c        | <0.001          |
| Sinensetin    | 373.1290                     | 343.1199                                                           | 10.39    | [M-C2H6]+                                       | 1.16 | nd                           |                                            |          |                                                 |      | c        | <0.001          |
| Tangeretin    | 373.1291                     | 343.1199                                                           | 11.60    | [M-C2H6]+                                       | 1.42 | nd                           |                                            |          |                                                 |      | c        | <0.001          |

|                                             |          |          |      |                                        |      |          |          |                     |                                     |      |        |        |
|---------------------------------------------|----------|----------|------|----------------------------------------|------|----------|----------|---------------------|-------------------------------------|------|--------|--------|
| Eriodictyol<br>rutinoside #1                | 451.1247 | 289.0738 | 5.35 | [M-Hexose]-                            | 1.15 | 595.1615 | 5.39     | [M-H]-              | 1.01                                | c    | <0.001 |        |
|                                             |          |          |      |                                        |      | 287.0569 | 5.33     | [M-<br>rutinoside]+ |                                     |      |        |        |
| Eriodictyol<br>rutinoside #2                | 597.1788 | 289.0732 | 6.14 | [M-<br>rutinoside]+                    | 0.97 | 595.1662 | 287.0574 | 6.17                | [M-<br>rutinoside]-                 | 0.97 | c      | <0.001 |
| Isorhamnetin-3-<br>O-rutinoside             | 625.1758 | 479.1195 | 6.76 | [M-<br>Deoxyhexosie]<br>+              | 1.50 | 623.1614 |          | 6.73                | [M-H]-                              | 1.36 | b      | <0.001 |
|                                             |          | 317.0669 |      | [M-Hexose]+                            | 1.46 | 315.0519 |          | 6.74                | [M-<br>rutinoside]-                 | 1.23 |        |        |
| Isorhamnetin<br>rutinoside<br>hexoside      | 787.2267 | 317.0568 | 5.40 | [M-<br>rutinoside]+                    | 1.14 | 785.2158 |          | 5.36                | [M-H]-                              | 1.25 | b      | <0.001 |
|                                             |          | 479.1185 |      | [M-hexoside]+                          | 1.29 |          |          |                     |                                     |      |        |        |
| Isorhamnetin<br>rutinoside<br>deoxyhexoside | 771.2325 | 317.0663 | 6.02 | [M-rutinoside-<br>deoxyhexoside<br>] + | 1.40 | 769.2181 |          | 6.06                | [M-H]-                              | 1.33 | b      | <0.001 |
| Kaempferol<br>diDeoxyhexoside<br>hexoside   | 741.2224 | 287.0559 | 5.98 | [M-<br>Deoxyhexosid<br>e-Hexoside] +   | 1.47 | 739.2099 |          | 6.07                | [M-H]-                              | 1.32 | b      | <0.001 |
|                                             |          | 595.1649 |      | [M-<br>Deoxyhexosid<br>e] +            |      |          |          |                     |                                     |      |        |        |
| Kaempferol<br>Deoxyhexoside<br>hexoside     | 595.1647 | 287.0565 | 6.63 | [M-<br>Deoxyhexosid<br>e-Hexoside] +   | 1.09 | 593.1558 | 285.0419 | 6.64                | [M-Hexoside-<br>Deoxyhexosid<br>e]- | 1.30 | b      | <0.001 |

|                                                                         |          |                      |      |                            |      |          |          |      |                                       |      |      |        |
|-------------------------------------------------------------------------|----------|----------------------|------|----------------------------|------|----------|----------|------|---------------------------------------|------|------|--------|
|                                                                         |          | 449.1100             | 6.64 | [M-deoxyhexoside]<br>+]    | 1.20 |          |          |      |                                       |      |      |        |
| Kaempferol<br>Caffeoyl<br>Hexoside<br>Deoxyhexoside                     | 757.2167 | 611.1477             | 5.34 | [M-Deoxyhexose]<br>+       | 1.38 | 755.2044 | 641.1742 | 5.33 | -                                     | 1.31 | b    | <0.001 |
|                                                                         |          | 449.1133<br>287.0644 |      | [M-Caffeoyl]<br>[M-Hexose] | +    |          |          |      |                                       |      |      |        |
| Kaempferol<br>hidoxymethyl<br>glutaryl (HMG)-<br>glucoside<br>tentative | 287.0565 |                      | 7.13 | Kaempferol<br>moiety       | 1.15 | 591.1360 | 161.0583 | 7.08 | hydroxymeth<br>yl glutarate<br>moiety | 0.92 | c    | <0.001 |
| Quercetin<br>hexoside<br>rutinoside                                     | 773.2128 | 465.1050             | 4.99 | [M-Rutinoside]<br>+        | 1.31 | 771.2002 |          | 4.99 | [M-H]-                                | 1.28 | b    | <0.001 |
|                                                                         |          | 303.0500             |      | [M-Hexose]<br>+            |      |          |          |      |                                       |      |      |        |
| Poncirin                                                                | 595.2021 | 577.1910             | 7.91 | [M-H <sub>2</sub> O]<br>+  | 1.12 | 593.1874 | 285.0776 | 7.91 | [M-rutinoside]-                       | 0.97 | b    | <0.001 |
|                                                                         |          | 449.1449             |      | [M-Deoxyhexose]<br>+       |      |          |          |      |                                       |      |      |        |
|                                                                         |          | 433.1497<br>287.0922 |      | [M-Hexose]<br>[M-Hexose]   | +    |          |          |      |                                       |      |      |        |
| Narirutin                                                               | 581.1857 | 435.1293             | 5.51 | [M-Deoxyhexose]<br>+       | 1.12 | 579.1449 |          | 5.77 | [M-H]-                                | 1.31 | a, b | <0.001 |
|                                                                         |          | 273.0766             |      | [M-Hexose]<br>+            |      |          |          |      |                                       |      |      |        |
| Naringin                                                                | 581.1864 |                      | 6.64 | [M+H]<br>+                 | 1.07 | 579.1711 |          | 6.65 | [M-H]-                                | 0.93 | a    | <0.001 |

|                                                 |         |          |          |       |                                       |      |          |          |         |                                       |      |        |        |  |
|-------------------------------------------------|---------|----------|----------|-------|---------------------------------------|------|----------|----------|---------|---------------------------------------|------|--------|--------|--|
|                                                 |         | 435.1291 |          | 6.63  | [M-Deoxyhexose] +                     | 1.15 |          |          |         |                                       |      |        |        |  |
|                                                 |         | 273.0768 |          | 6.67  | [M-Hexose] +                          | 1.00 |          |          |         |                                       |      |        |        |  |
| Deacetyl<br>Nomilinic<br>glycoside<br>tentative | acid    | 693.2733 | 491.2279 | 6.50  | [M-Hexose] +                          | 0.98 | 669.2754 | 6.53     | [M-H] - | 0.96                                  | c    | <0.001 |        |  |
| Deacetyl<br>glycoside                           | Nomilin | 675.2619 | 473.2176 | 6.96  | [M-Hexose] +                          | 1.01 | 651.2673 | 6.96     | [M-H] - | 0.96                                  | c    | <0.001 |        |  |
| Nomilin                                         |         | 515.2286 | 487.2336 | 11.14 | [M-CO] +                              | 0.94 | 513.2118 | 11.14    | [M-H] - | 1.03                                  | b    | <0.001 |        |  |
| Nomilinic<br>glycoside                          | acid    | 712.3161 | 455.2066 | 7.39  | [M-CH <sub>3</sub> COOH] +            | 1.23 | 711.2874 | 7.36     | [M-H] - | 1.02                                  | b    | <0.001 |        |  |
|                                                 |         |          | 515.2279 |       | [M-CH <sub>3</sub> ] +                |      |          |          |         |                                       |      |        |        |  |
|                                                 |         |          | 533.2380 |       | [M-Hexose] +                          |      |          |          |         |                                       |      |        |        |  |
| Nomilin<br>lactone                              | A-ring  | 533.2381 |          | 10.53 |                                       | 1.04 | 531.2236 | 515.1915 | 10.53   | [M-CH <sub>3</sub> ] -                | 1.03 | b      | <0.001 |  |
|                                                 |         |          |          |       |                                       |      |          | 489.2155 |         | [M-CH <sub>3</sub> CO] -              | 1.11 |        |        |  |
|                                                 |         |          |          |       |                                       |      |          | 469.1865 |         | [M-CH <sub>2</sub> O <sub>2</sub> ] - | 1.07 |        |        |  |
|                                                 |         |          |          |       |                                       |      |          | 427.2129 |         | [M-CH <sub>2</sub> O <sub>3</sub> ] - | 1.16 |        |        |  |
|                                                 |         |          |          |       |                                       |      |          | 411.1453 |         | [M-CH <sub>2</sub> O <sub>4</sub> ] - | 1.03 |        |        |  |
| Nomilin<br>glycoside<br>tentative               |         | 735.2791 | 533.2380 | 7.35  | [M-Hexose]                            | 1.07 | 711.2874 | 7.36     | [M-H] - | 1.02                                  | c    | <0.001 |        |  |
|                                                 |         |          | 515.2279 | 7.37  | [M-Hexose] - CO] +                    | 1.15 |          |          |         |                                       |      |        |        |  |
|                                                 |         |          | 488.2377 | 7.39  | -                                     | 1.21 |          |          |         |                                       |      |        |        |  |
|                                                 |         |          | 469.2226 | 7.37  | [M-CH <sub>2</sub> O <sub>2</sub> ] + | 1.19 |          |          |         |                                       |      |        |        |  |
|                                                 |         |          | 457.2096 | 7.39  | -                                     | 1.18 |          |          |         |                                       |      |        |        |  |

|                                    |          |          |       |              |      |
|------------------------------------|----------|----------|-------|--------------|------|
|                                    |          | 455.2066 | 7.40  | [M-C2H4O2]+  | 1.09 |
|                                    |          | 427.2121 | 7.39  | [M-CO]+      | 1.23 |
|                                    |          | 419.1991 | 7.39  | -            | 1.18 |
| Obacunone                          | 455.2076 | -        | 11.14 | [M+H]+       | 0.91 |
| Obacunoic acid                     | 473.2170 | 429.2274 | 10.26 | [M-CO]+      | 1.50 |
| Obacunone glycoside                | 455.208  |          | 7.71  | [M-Hexose]+  | 1.12 |
|                                    |          |          |       |              |      |
| Ichangin                           | 489.2120 |          | 9.65  | [M+H]+       | 1.38 |
| Limonoate A-ring lactone tentative | 489.2120 |          | 9.81  | -            |      |
|                                    |          |          |       |              |      |
| Limonin                            | 471.2018 | 381.2074 | 10.56 | [M+H-CO2]+   | 1.24 |
|                                    |          | 383.1955 |       | [M+H-COCH2]+ |      |
|                                    |          | 397.2022 |       | [M+H-CO]+    |      |
|                                    |          | 425.1964 |       | [M+H-HCOOH]+ |      |
|                                    |          | 443.2070 |       | [M+H-CO]+    |      |
| Limonin 17 beta D glucopyranoside  | 674.2515 | 453.1923 | 6.38  | [M+H-H2O]+   |      |
|                                    |          | 425.1964 |       | [M+H-HCOOH]+ | 1.10 |
|                                    |          | 443.2072 |       | [M+H-CO]+    | 1.19 |
|                                    |          | 453.1916 |       | [M+H-H2O]+   | 1.10 |
| Tryptophan                         | 205.0988 | 471.2014 | 4.18  | [M-Hexose]   | 1.10 |
|                                    |          | 144.0837 |       | [M+H-CO2]+   | 1.13 |

|          |          |       |                      |      |      |        |
|----------|----------|-------|----------------------|------|------|--------|
| nd       |          |       |                      |      | c    | <0.001 |
| nd       |          |       |                      |      | b    | <0.001 |
| 633.2555 | 499.1799 | 7.73  | [M-Hexose+HCOOH]-    | 1.41 | c    | <0.001 |
|          | 517.2292 |       | [M-Hexose fragment]- |      |      |        |
| 487.2120 | 427.1880 | 9.61  | [M-C2H4O2]-          | 1.21 | c    | <0.001 |
| 487.2120 | 427.1880 | 9.81  | [M-C2H4O2]-          | -    | c    | <0.001 |
|          | 383.1847 |       | -                    |      |      |        |
| 469.1935 |          | 10.53 |                      | -    | a    | <0.001 |
|          |          |       |                      |      |      |        |
| 649.2501 | 605.2612 | 6.38  | [M-CO2]-             | 1.03 | a, b | <0.001 |
|          |          |       |                      |      |      |        |
| 203.0840 | 142.0670 | 4.16  | [M-NH3]-             | 1.12 | b    | <0.001 |

|                               |          |                                                          |       |                                                                                                                                                                       |      |          |          |                                   |                                                                        |                                                                                                                                          |      |        |
|-------------------------------|----------|----------------------------------------------------------|-------|-----------------------------------------------------------------------------------------------------------------------------------------------------------------------|------|----------|----------|-----------------------------------|------------------------------------------------------------------------|------------------------------------------------------------------------------------------------------------------------------------------|------|--------|
|                               |          | 146.0618                                                 |       | [M+H-COCH <sub>2</sub> ] <sup>+</sup>                                                                                                                                 |      | 116.0523 | 4.17     | -                                 |                                                                        |                                                                                                                                          |      |        |
|                               |          | 170.0605                                                 |       | [M+H-H <sub>2</sub> O] <sup>+</sup>                                                                                                                                   |      | 159.0943 | 4.16     | [M-CO <sub>2</sub> ] <sup>-</sup> |                                                                        |                                                                                                                                          |      |        |
|                               |          | 188.0718                                                 |       | [M-NH <sub>3</sub> ] <sup>+</sup>                                                                                                                                     |      |          |          |                                   |                                                                        |                                                                                                                                          |      |        |
| Phenylalanine                 | 166.0869 | 103.0539                                                 | 2.30  | [M-NH <sub>3</sub> ] <sup>+</sup><br>[M-HCO <sub>2</sub> ] <sup>+</sup>                                                                                               | 1.34 | 164.0712 | 2.33     |                                   |                                                                        | 0.93                                                                                                                                     | b    | <0.001 |
| Absciscic acid                | 247.1348 | 201.1286<br>205.1240<br>219.1395<br>229.1249             | 8.18  | [M-HCOOH] <sup>+</sup><br>[M-COCH <sub>2</sub> ] <sup>+</sup><br>[M-CO] <sup>+</sup><br>[M-H <sub>2</sub> O] <sup>+</sup>                                             | 1.07 | 263.1303 | 8.35     |                                   | 0.95                                                                   | a                                                                                                                                        |      | <0.001 |
| Absciscic acid glycosyl ester | 427.1023 | 201.1285<br>205.1228<br>219.1416<br>229.1251<br>247.1345 | 6.60  | [M-HCOOH] <sup>+</sup><br>[M-COCH <sub>2</sub> ] <sup>+</sup><br>[M-CO] <sup>+</sup><br>[M-H <sub>2</sub> O] <sup>+</sup><br>[M-Hexose-H <sub>2</sub> O] <sup>+</sup> | 1.46 | 425.1821 | 285.0419 | 6.66                              | [M-Hexose+Na] <sup>-</sup>                                             | 1.07                                                                                                                                     | a    | <0.001 |
| 12-oxophytodienoic acid       | 293.2105 | 275.2005                                                 | 13.05 | [M-H <sub>2</sub> O] <sup>+</sup>                                                                                                                                     | 1.12 | 291.2331 | 247.1989 | 13.05                             | [M-HCO <sub>2</sub> ] <sup>-</sup>                                     | 0.90                                                                                                                                     | a    | <0.001 |
| Dihydroconiferyl alcohol      | 183.1031 | 147.0462<br>165.0560                                     | 6.35  | [M-2xH <sub>2</sub> O] <sup>+</sup><br>[M-H <sub>2</sub> O] <sup>+</sup>                                                                                              | 1.42 | 165.1235 | 181.0878 | 119.0517                          | 6.35                                                                   | [M-C <sub>2</sub> H <sub>6</sub> O <sub>2</sub> ] <sup>-</sup><br>[M-CO <sub>2</sub> ] <sup>-</sup><br>[M-H <sub>2</sub> O] <sup>-</sup> | 1.32 | <0.001 |
| caffeic acid                  | 181.0599 | 163.0495                                                 | 5.40  | [M-H <sub>2</sub> O] <sup>+</sup>                                                                                                                                     | 1.16 | 179.0379 | 135.0490 | 5.47                              | [M-CO <sub>2</sub> ] <sup>-</sup>                                      | 1.35                                                                                                                                     | a    | <0.001 |
| sinapinic acid                | 225.0763 | 119.0526<br>145.0329                                     | 6.65  | [M-C <sub>2</sub> H <sub>2</sub> ] <sup>+</sup><br>[M-CH <sub>2</sub> O] <sup>+</sup>                                                                                 | 1.26 | 223.0626 | 208.047  | 6.71                              | [M-CH <sub>3</sub> ] <sup>-</sup><br>[M-CO <sub>2</sub> ] <sup>-</sup> | 1.22                                                                                                                                     | a    | <0.001 |
|                               |          |                                                          |       |                                                                                                                                                                       |      |          | 179.066  |                                   |                                                                        |                                                                                                                                          |      |        |

|                     |          |          |      |              |      |
|---------------------|----------|----------|------|--------------|------|
|                     |          | 175.0412 |      | [M-CH4O]+    |      |
|                     |          | 207.0668 |      | [M-H2O]+     |      |
| chlorogenic acid    | 355.1035 | 163.0417 | 5.08 | [M-C7H12O6]+ | 1.03 |
| Glucosyl salicylate | nd       |          |      |              |      |

|          |          |      |             |      |      |        |
|----------|----------|------|-------------|------|------|--------|
|          | 164.051  |      | [M-CH3]-    |      |      |        |
| 353.0883 | 191.0213 | 4.96 | [M-Hexose]- | 1.32 | a    | <0.001 |
| 299.0776 | 137.0264 | 3.88 | [M-Hexose]+ | 0.98 | a, b | <0.001 |
