# Supplementary material for: Developmental Stage- and Genotype-Dependent Regulation of Specialized Metabolite Accumulation in Fruit Tissues of Different Citrus Varieties
Source: Int J Mol Sci. 2019 Mar 12;20(5):1245. doi: 10.3390/ijms20051245 (PMC6429498; doi:10.3390/ijms20051245)
Supplement: Supplementary file 1 [file ijms-20-01245-s001.zip]

Archive with 6 entries (6 files):
- Figures S1-S5.pdf
- Supplementary Materials and Methods S1.pdf
- Tables S1 and S2.pdf
- Tables S3 and S4.xls
- Tables S5 and S6.xls
- Tables S7 and S8.xlsx
