# Supplementary material for: Developmental Stage- and Genotype-Dependent Regulation of Specialized Metabolite Accumulation in Fruit Tissues of Different Citrus Varieties
Source: Int J Mol Sci. 2019 Mar 12;20(5):1245. doi: 10.3390/ijms20051245 (PMC6429498; doi:10.3390/ijms20051245)
Supplement: Supplementary file 1 [file ijms-20-01245-s001.zip › Tables S3 and S4.xls]

## Sheet: G+T+U-Pulp pos
Table S3. Normalized pulp metabolite profiles in positive electrospray mode.
Variable name (mz_rt_isotopes_adduct_pcgroup)	Duncan grapefruit-Pulp-20 days after F.B.(1)	Duncan grapefruit-Pulp-20 days after F.B.(2)	Duncan grapefruit-Pulp-20 days after F.B.(3)	Duncan grapefruit-Pulp-80 days after F.B.(1)	Duncan grapefruit-Pulp-80 days after F.B.(2)	Duncan grapefruit-Pulp-80 days after F.B.(3)	Duncan grapefruit-Pulp-110 days after F.B.(1)	Duncan grapefruit-Pulp-110 days after F.B.(2)	Duncan grapefruit-Pulp-110 days after F.B.(3)	Duncan grapefruit-Pulp-200 days after F.B.(1)	Duncan grapefruit-Pulp-200 days after F.B.(2)	Duncan grapefruit-Pulp-200 days after F.B.(3)	Wase mandarin-Pulp-20 days after F.B.(1)	Wase mandarin-Pulp-20 days after F.B.(2)	Wase mandarin-Pulp-20 days after F.B.(3)	Wase mandarin-Pulp-80 days after F.B.(1)	Wase mandarin-Pulp-80 days after F.B.(2)	Wase mandarin-Pulp-80 days after F.B.(3)	Wase mandarin-Pulp-110 days after F.B.(1)	Wase mandarin-Pulp-110 days after F.B.(2)	Wase mandarin-Pulp-110 days after F.B.(3)	Wase mandarin-Pulp-200 days after F.B.(1)	Wase mandarin-Pulp-200 days after F.B.(2)	Wase mandarin-Pulp-200 days after F.B.(3)	Thomson navel orange-Pulp-20 days after F.B.(1)	Thomson navel orange-Pulp-20 days after F.B.(2)	Thomson navel orange-Pulp-20 days after F.B.(3)	Thomson navel orange-Pulp-80 days after F.B.(1)	Thomson navel orange-Pulp-80 days after F.B.(2)	Thomson navel orange-Pulp-80 days after F.B.(3)	Thomson navel orange-Pulp-110 days after F.B.(1)	Thomson navel orange-Pulp-110 days after F.B.(2)	Thomson navel orange-Pulp-110 days after F.B.(3)	Thomson navel orange-Pulp-200 days after F.B.(1)	Thomson navel orange-Pulp-200 days after F.B.(2)	Thomson navel orange-Pulp-200 days after F.B.(3)
50.0434491622636_1012.877136145___4270	21.2875	49.6795	30.6249	12.4003	6.37229	28.8386	6.13036	0.0451426	9.50738	25.5783	6.37011	5.25191	27.3985	35.8937	33.2228	33.3056	32.4739	7.73019	27.0068	13.0255	21.6551	27.6741	29.6182	30.2309	114.936	42.3934	138.441	166.956	70.3787	58.0853	110.177	84.3147	176.944	192.231	35.1234	46.6542
50.0775371907373_674.771608459805___20	720.74	439.514	418.952	0.0378092	0.0579095	5.75372	12.2805	4.94194	9.5109	6.39006	6.36487	0.0480593	4.59766	24.1085	5.59211	16.7267	9.36341	23.4819	4.53043	6.56407	4.3401	0.0423771	14.9209	8.67794	655.329	806.819	727.575	32.4018	29.5077	60.428	18.5783	10.0382	33.6812	29.4311	8.77171	21.396
50.0955789150823_1103.16024194272__[M+3H-C2H4]3+ 175.297_84	60.4958	216.28	85.954	41.9948	89.3418	57.8639	104.586	79.1533	91.5486	76.9897	121.641	90.5734	68.1277	137.232	631.99	94.4348	90.2145	131.574	112.243	48.5538	99.723	69.3067	82.3597	103.46	321.084	127.02	90.8794	113.267	123.84	224.305	32.3609	124.4	145.281	82.4283	87.645	208.343
50.0968814670234_980.927401068642___1	29.6246	171.52	151.643	77.9428	125.563	131.276	109.402	78.4291	75.5746	161.804	127.435	68.016	77.5297	199.096	167.744	143.009	146.708	86.1896	143.071	29.5979	128.258	114.496	142.397	99.5221	395.07	449.792	370.704	377.167	339.441	439.01	149.81	314.758	242.729	95.0394	48.8967	390.217
50.1024400182388_1046.92413531462___7503	76.893	312.16	221.997	41.5331	185.869	180.167	240.891	173.964	395.474	225.444	224.971	100.146	149.043	520.907	491.018	289.978	128.633	204.386	880.599	61.1428	176.176	241.187	652.388	1204.32	368.898	290.898	241.053	275.804	202.019	190.836	194.66	227.482	251.578	179.515	113.891	279.078
50.1829653187635_399.575677301605__[M+3H-COCH2]3+ 189.541_8	713.674	963.613	803.63	681.96	624.968	511.607	466.808	438.623	481.763	408.961	378.32	590.814	403.925	408.815	406.007	289.73	233.67	189.811	107.92	104.927	139.437	72.2578	88.7038	73.4468	203.799	198.747	171.603	136.286	179.195	188.154	23.4615	115.185	39.6391	47.5319	66.5128	43.2531
50.2524144905948_674.646176038263___20	150.664	115.188	146.183	4.12705	12.6666	11.5074	6.14025	14.8258	23.7772	0.0583543	0.058061	10.5212	0.0419457	24.1085	16.7763	16.7034	0.042614	11.7409	0.0413265	13.1281	4.3401	18.5747	19.8945	13.0169	214.065	280.878	257.884	27.0015	17.7046	21.0912	4.64458	5.0111	16.818	5.88622	4.38586	28.4889
50.2775049485069_979.552403036169___1	46.6564	98.1975	121.581	61.6517	100.544	85.777	73.0873	82.8416	61.5284	126.868	164.485	78.3636	50.2855	127.066	123.207	121.312	85.9551	89.2717	132.07	26.3936	113.224	110.141	149.586	69.6207	316.277	565.028	405.57	407.64	241.465	259.701	116.175	319.114	216.145	160.769	57.9466	351.779
50.3558853947044_399.650622927207___8	757.201	606.564	641.058	561.335	378.013	528.54	359.241	379.815	385.322	329.938	265.858	452.63	102.102	352.375	371.465	205.858	173.238	139.611	98.827	104.501	107.365	18.4574	64.1694	38.8381	149.986	228.527	165.194	99.2772	113.163	122.903	46.8431	116.682	73.6154	23.7272	22.1295	28.7872
50.4301401994524_674.578599734752___20	145.969	82.1681	115.86	8.25409	0.0579095	11.4953	0.0559893	4.94194	9.5109	0.0583543	25.4251	26.3031	18.3659	6.02714	22.6584	27.8389	0.042614	3.90833	13.5726	9.83249	4.3401	13.9119	14.901	13.0169	124.339	284.476	351.37	32.4018	11.7874	21.0912	13.9154	10.0222	11.212	11.7564	13.1576	14.2445
50.4536011784609_1110.22412165407__[M+K]+ 11.4944_19	46.832	234.981	79.7761	37.2229	140.433	40.5081	104.577	74.22	108.858	83.4124	44.8079	120.676	72.7513	119.357	452.498	172.048	97.4565	112.086	142.122	48.6415	134.538	139.529	166.11	107.186	329.631	155.228	90.8901	107.873	76.6083	148.019	37.014	179.777	100.622	82.5316	87.6575	116.407
50.5344633728223_403.960147439076__[M+3H-C6H8O6]3+ 324.625_66	389.446	389.964	324.509	287.764	260.235	287.295	231.715	227.904	261.904	243.778	165.065	235.809	188.647	190.728	153.687	143.968	106.16	104.769	59.1552	19.8336	70.5242	28.0483	79.9037	56.7562	72.5725	135.045	74.8642	76.1897	59.4556	100.944	37.4264	75.3299	56.6275	53.307	30.9288	35.9219
50.6338343185686_1052.06315229671___3	47.0344	305.931	281.327	62.3693	416.963	209.936	173.159	119.422	502.241	276.39	476.335	110.779	308.395	594.527	161.806	242.867	155.774	170.74	452.734	128.303	145.438	334.67	412.732	394.55	483.291	423.628	244.054	488.759	249.977	270.318	838.36	265.165	274.377	177.046	109.842	564.654
50.6259703583242_1111.30542175492___19	68.1172	157.962	73.6429	33.0867	44.6719	70.4527	49.2133	29.6812	66.4493	102.662	57.6115	89.0505	50.0026	101.319	301.588	186.07	127.176	118.757	98.8567	32.4282	150.777	112.55	108.473	95.8615	162.441	133.808	34.0855	102.453	64.7376	89.8707	41.5842	70.0586	83.8494	88.4279	35.0608	85.3118
50.7143677074735_405.781166229431__[M+3H-C6H10O5]3+ 311.185_66	237.251	248.138	208.69	128.996	50.5564	120.434	146.2	119.121	142.217	95.6906	121.646	141.157	77.7548	77.8136	61.0651	60.8209	37.1545	38.7888	17.9811	19.5393	38.8499	27.6245	24.6563	25.8672	64.4689	77.2012	28.3878	80.6041	11.7419	41.9592	32.3302	69.8036	44.6305	29.2483	21.8145	14.1909
50.8131361938792_1055.38131671141__[M+H]+ 49.8045_3	63.329	375.267	263.123	53.3564	507.77	201.143	189.312	156.651	445.243	261.066	477.99	104.162	233.097	749.42	342.461	434.414	163.222	303.721	621.608	78.0765	194.427	386.75	500.485	1188.17	469.552	390.14	276.109	476.543	257.286	209.862	686.149	261.392	245.788	165.634	104.181	463.362
50.8064200922833_1111.47862565207__[M+H]+ 49.8027_19	38.3066	254.52	123.9	41.3467	169.734	17.3611	61.5153	74.2018	99.6762	89.8301	51.2093	73.4315	68.1864	135.32	257.701	166.59	141.864	125.15	120.327	52.9421	129.994	184.329	177.97	119.884	334.002	126.937	102.261	80.8851	70.7164	100.45	64.7892	74.8843	122.976	70.7375	61.3689	99.5311
50.8092047165648_981.404914410743__[M+2H-H20]2+ 117.621_1	67.7893	355.484	197.576	65.707	283.676	220.198	249.048	162.83	148.652	171.195	220.714	82.0342	100.426	191.09	175.315	172.698	138.208	85.1698	126.604	26.0045	185.403	137.575	142.463	145.745	397.872	621.364	493.333	369.122	244.541	299.649	105.684	260.323	146.542	237.811	44.4857	423.724
50.914327411447_501.596660571997___16	42.586	24.7512	73.4561	12.4092	19.0247	46.0335	6.1461	4.943	9.51926	6.40157	0.058061	0.0480593	18.3356	24.0266	38.9942	33.3381	4.66365	15.5751	36.1397	29.4438	21.6663	13.8832	9.90221	8.65569	0.0597342	70.4002	22.7959	64.8218	47.1079	36.851	9.26586	20.0352	11.2146	11.7459	8.76792	7.11822
50.9865681468426_1050.27724868213__[M+K]+ 12.0188_3	64.0661	486.162	244.556	58.1364	353.817	226.665	247.066	193.849	406.629	323.224	491.18	115.774	250.239	641.036	256.822	233.856	118.379	291.772	231.028	94.2832	175.207	466.467	235.404	346.66	383.415	377.17	250.547	179.991	294.919	382.981	503.54	402.652	244.496	192.877	135.843	470.451
50.9823624859319_1111.11593449829__[M+Na]+ 27.9937_19	25.5041	225.871	110.464	45.4212	146.238	98.6349	70.4305	93.9904	80.579	70.5804	57.6115	41.9609	45.4569	125.526	255.323	128.487	88.175	107.932	67.493	35.671	95.436	148.021	197.457	105.759	238.327	98.7287	92.9416	96.9342	52.9671	125.179	69.307	89.7439	89.3188	88.3042	43.826	106.499
51.0095220948772_1004.80734328492___31	46.7569	216.044	189.122	57.7855	352.426	189.885	183.339	208.035	154.275	378.248	69.9058	89.1046	153.048	83.513	93.9095	60.8534	60.2018	77.3196	49.4081	45.5676	86.3158	92.0599	108.306	238.282	302.259	312.125	214.228	185.31	268.702	201.054	106.924	309.991	208.067	171.312	44.0438	256.445
51.1656567075126_1111.28836325452__[M+2Na]2+ 56.3587_19	21.2814	174.593	110.341	33.0774	51.0544	40.5092	49.2122	69.255	104.423	64.1643	51.2093	41.9609	29.5611	155.791	363.991	133.272	113.646	173.119	80.9915	44.7182	93.3297	240.924	185.531	164.162	247.244	126.937	113.624	111.791	94.2885	130.599	55.5336	153.132	78.2576	53.0531	56.8997	199.062
51.1730757866275_1044.67089683523__[M+K]+ 12.214_5	76.526	446.105	325.323	74.3871	332.622	261.462	215.264	201.983	295.079	325.82	386.041	141.535	494.687	718.857	195.286	156.574	140.134	343.6	320.3	68.7101	183.52	385.992	409.953	408.672	397.961	366.191	278.383	443.005	289.182	401.925	352.803	341.945	283.226	258.681	178.4	681.085
51.34328863533_1111.31106404377___19	52.613	149.442	104.185	53.6797	70.1062	40.4551	73.722	64.2202	75.7462	83.3011	70.316	72.1234	31.7792	119.061	275.082	138.646	55.6123	204.959	104.072	29.1448	112.639	260.808	178.025	124.326	149.291	84.5103	45.3345	102.196	76.508	193.424	69.2236	149.394	111.647	94.1938	87.5391	239.691
51.3455805048894_983.727739464626__[M+H]+ 50.3352_1	25.7573	486.354	104.565	54.0366	398.755	150.41	166.149	181.386	67.1041	218.268	210.751	68.8083	155.047	89.477	121.412	104.448	82.9246	73.5246	71.8516	25.9778	132.631	137.41	168.801	98.6066	180.86	273.561	204.1	121.249	131.822	240.056	33.2172	150.165	217.481	168.558	49.5469	195.968
51.5181517354436_1110.70079288985__[M+Na+NH3]+ 11.4944_19	38.2561	157.747	97.9574	33.0336	50.9871	63.4963	67.5771	64.2221	71.0991	51.2627	63.8437	41.9061	129.152	125.159	171.265	88.4059	96.7321	140.873	139.959	42.045	103.975	283.879	108.473	89.9769	90.9668	126.765	73.7578	64.6228	58.8523	133.299	50.8252	60.2958	100.484	82.4173	52.461	106.499
51.5260725874874_1044.82893787381__[M+Na]+ 28.5409_5	85.2769	283.582	244.854	79.14	274.251	185.559	209.493	123.986	142.713	359.301	259.787	99.8917	232.425	453.764	199.299	231.021	111.369	189.759	191.433	78.0302	163.38	233.396	223.012	216.355	343.729	388.612	343.59	369.8	342.712	365.831	191.25	227.167	223.588	313.53	113.771	342.652
51.947856628853_397.33490756769___8	703.712	1082.25	1066.17	303.753	396.864	294.084	177.288	147.672	152.426	63.9826	89.2751	115.078	22.8805	12.0114	38.9508	16.6313	23.3056	15.5488	22.4996	19.6023	17.335	13.8638	24.7066	4.32546	551.875	815.33	542.617	66.6778	125.39	180.338	18.5359	50.0138	50.3547	41.0732	39.4017	14.2395
51.9540265935098_417.797295765682___38	873.318	847.89	1460.78	301.178	232.031	310.792	187.272	168.788	140.406	102.867	96.0413	111.104	50.6079	60.3112	44.7692	33.4575	23.4117	39.085	22.6487	39.4375	17.4139	23.233	29.8275	39.1206	569.809	719.946	568.252	110.363	100.778	196.935	51.2121	75.3993	61.9208	70.7516	57.176	107.255
52.0836153825322_982.825589396536___1	47.1493	201.447	141.253	62.3451	121.053	191.232	123.08	190.148	119.637	175.615	51.0659	65.2077	72.9633	29.8571	33.1144	49.4755	41.4623	46.486	4.4724	29.2251	42.7712	91.6067	83.4262	72.8057	144.55	136.57	97.6175	108.823	112.38	74.2326	74.9721	117.015	28.1687	154.546	57.8153	107.484
52.1266413071346_397.648289217359___8	552.639	811.935	953.758	268.698	275.625	351.354	178.301	180.456	109.277	96.5397	71.0233	105.718	13.7283	11.9967	11.1288	11.0876	9.31064	19.436	13.4998	22.8693	0.0396735	13.8638	4.94133	12.9605	456.178	567.237	472.933	95.529	82.385	127.74	23.1419	35.0097	27.9748	11.7186	13.1186	28.4442
52.1310964289972_417.6865378671___38	700.49	1109.24	1326.11	282.331	363.542	487.759	257.682	223.154	169.22	141.127	95.3746	121.853	50.7956	60.4288	44.896	78.2083	46.9102	27.4118	27.2373	29.6635	30.53	41.9405	49.8073	52.2566	486.326	606.844	521.204	157.458	124.526	180.135	60.6325	60.5389	45.1613	47.2581	70.4936	21.4901
52.2636095856033_983.989223583141___238	51.5147	304.228	86.1124	58.2764	101.798	202.53	219.014	212.939	112.1	64.2871	70.3433	89.9801	91.2978	47.721	44.1499	33.0136	41.4623	46.4366	26.8344	25.9779	25.6705	59.5444	88.3443	51.3922	146.42	64.7908	69.7859	137.783	77.895	96.6888	77.9817	91.9885	45.0698	96.3188	67.564	152.873
52.3067607430289_397.85757416387__[M+H]+ 51.2978_8	366.408	374.371	426.466	193.953	184.29	166.782	143.932	73.975	176.892	121.567	109.763	57.928	22.8805	29.9918	50.1425	27.7189	13.966	31.0976	13.4998	9.80115	4.32834	4.62126	4.94133	8.64033	230.621	316.341	231.254	64.6516	58.8465	68.3453	27.7702	55.0152	50.3547	5.85931	30.61	21.3331
52.3045403092971_417.797295765682__[M+H-COCH2]+ 93.3134_38	141.125	198.859	230.31	124.465	146.456	185.052	73.3401	94.263	95.543	77.1311	83.1455	58.1735	18.4082	18.0859	95.0875	50.1612	37.4412	31.254	27.1953	6.57051	26.1024	4.64291	34.7737	17.3778	166.206	164.85	126.309	75.8408	76.8888	63.4133	65.1415	35.2049	50.6652	53.0484	52.7509	57.179
52.3210238024134_475.744349932971___10	957.237	916.952	819.791	355.653	252.928	382.294	170.659	156.667	176.823	84.1258	110.831	110.272	149.36	202.407	138.38	196.499	181.693	102.552	36.1371	29.8732	47.7657	13.9048	59.5561	13.0095	71.8401	112.494	176.8	133.876	95.0024	131.734	64.975	84.2656	42.6255	35.2875	30.735	14.2489
52.3825687911351_674.826800527247___20	273.833	252.758	282.9	4.12705	6.33331	11.4953	0.0559893	0.0451426	0.0434681	0.0583543	6.35627	5.26062	27.586	12.0543	11.1842	5.56778	9.36341	7.82729	0.0413265	3.2775	21.7005	9.28736	14.9209	8.67794	737.648	1055.91	1078.31	70.2038	11.7874	108.737	23.2229	15.0333	11.212	23.5449	4.38586	14.2445
52.4372681477085_982.522452901907___1	25.7553	365.613	191.226	62.4343	254.951	189.057	308.018	347.046	128.076	250.901	70.2156	58.2186	101.019	77.5374	38.6335	65.9674	23.0581	48.7665	35.8081	32.5054	34.217	96.187	110.919	85.736	106.576	206.081	80.3909	92.4997	116.633	109.467	79.6578	131.376	101.388	190.291	71.1574	107.484
52.5015001831685_481.678421624649___110	765.965	581.236	735.207	290.628	184.613	204.9	86.0908	113.371	94.3256	73.2717	57.3437	131.532	148.011	149.755	112.259	103.191	93.5895	128.302	18.0215	16.3485	34.772	18.4887	29.6964	17.3202	58.712	139.202	111.806	142.171	114.161	126.579	27.7959	45.1001	22.4225	23.4603	26.2712	35.5765
52.495555424991_397.400088073072___8	195.757	173.094	232.625	86.934	69.7161	46.0199	67.6199	59.2497	71.3526	19.1948	31.884	42.1295	22.8805	12.0114	5.56439	5.54918	13.9834	0.0356921	9.01026	6.54226	4.33374	9.25345	14.8412	12.9764	131.799	147.554	132.91	54.0412	35.3506	36.8013	27.8038	25.0069	5.59496	46.9408	26.2678	0.0652299
52.5626578974207_674.578599734752___20	378.099	196.86	226.235	8.25409	0.0579095	11.4953	36.7936	4.93516	0.0434681	12.7631	0.058061	15.7819	9.18298	18.0572	0.0509082	27.8389	9.36341	23.4519	4.52419	13.11	17.3604	13.9136	9.93469	12.9997	820.285	1122.45	1202.64	37.8021	23.5748	99.8354	23.1915	30.0666	11.212	35.2706	4.38586	14.2445
52.6248556574851_983.230437588431___1	38.5767	273.127	157.946	45.7886	250.076	166.289	253.873	358.04	165.396	204.793	19.1845	63.4181	118.565	35.8286	49.721	27.4864	46.1163	58.1075	40.2841	42.214	25.6627	36.6766	54.0377	55.6749	131.409	156.513	132.071	97.9409	173.454	84.8372	90.8955	65.6879	78.8722	165.144	114.084	128.981
52.6767741999285_482.080986347481___110	454.531	365.223	441.369	187.257	109.661	150.449	55.3456	54.3831	52.4025	58.3216	44.6086	54.862	82.9749	78.043	78.0399	27.7511	52.3904	38.9556	18.047	6.53927	8.67242	18.4885	4.95558	17.3241	225.8	201.981	248.264	94.4503	70.5645	89.5404	18.5298	60.119	28.0278	5.87217	26.3045	35.5752
52.6770222107049_415.777953012674__[M+H+NH3]+ 34.6339_38	173.625	65.7343	203.229	88.2463	119.904	131.832	67.4072	108.326	94.7299	51.0369	44.4395	47.237	23.1348	42.4244	44.9794	22.4052	28.2279	23.5677	27.3338	16.5123	8.74452	9.31894	24.9821	26.202	39.5342	56.8739	57.5096	38.1251	53.5132	31.8688	18.7106	20.2211	16.9777	47.4033	26.5118	21.5612
52.7445970406263_674.799204493526___20	157.849	83.8105	183.787	0.0378092	12.6666	0.0525653	0.0559893	4.94194	14.2663	6.39006	6.35627	0.0480593	9.19532	12.0543	27.9605	22.2711	9.36341	0.0356921	9.04838	3.2775	8.68019	27.8621	0.0454262	0.0395657	358.964	668.639	513.437	37.8021	17.6811	74.0931	13.9337	15.0333	5.60598	17.6586	8.77171	7.12223
52.7564318413258_1112.32703953812__[M+Na]+ 29.7699 [M+2Na]2+ 59.5385_19	4.25041	182.657	48.981	12.3873	57.2894	34.6259	79.8452	49.4008	28.4388	44.8553	63.8428	47.1431	27.2064	143.038	128.038	44.3675	69.5122	53.9645	98.8329	38.8112	51.9746	50.7387	54.2224	47.4156	71.472	112.678	62.4108	48.4673	52.9654	63.2744	23.1077	59.8278	81.8564	11.7736	78.69	108.279
52.8530027229975_482.489233767218___110	266.596	240.199	254.292	45.9655	107.494	45.9803	42.992	14.8129	23.7887	6.39065	19.0951	21.0621	27.4611	23.9844	66.8049	11.0849	41.8916	7.78134	22.5269	13.0788	34.6477	18.4687	14.8482	8.65128	189.386	190.496	128.457	21.5801	23.495	36.825	13.8807	25.0183	33.5921	5.86507	13.1356	0.0652299
52.8550554360735_412.656009199073___38	150.769	115.27	121.87	63.124	63.2418	114.84	42.931	192.927	100.845	70.2498	38.1282	42.0401	27.7538	42.4912	16.8939	22.4392	9.42442	27.5312	13.6876	9.90727	35.0313	18.6627	10.0059	30.615	26.397	28.4805	34.5599	32.7281	17.8648	21.2785	28.1152	30.3732	11.3361	5.9358	13.2817	7.19828
52.9253047228629_674.841778366118___20	149.871	90.3792	97.5425	0.0378092	18.9999	17.2612	12.2805	4.93516	4.75545	12.7631	0.058061	10.5212	9.18298	6.01905	11.1842	16.7267	4.67527	11.7259	4.53043	9.84611	4.3401	9.27576	9.93469	12.9997	187.11	252.078	339.213	21.6012	5.90155	23.1887	27.8298	10.0222	11.2271	47.0274	4.38586	7.132
52.957140081165_976.15605298142__[M+2Na]2+ 59.9367_80	38.6194	1210.2	435.676	54.0917	413.892	1193.76	2126.75	1125.75	400.096	416.908	1031.19	1533.34	97.1967	161.617	310.805	44.6669	98.9463	58.9818	171.884	19.5092	121.468	98.2807	79.7529	194.688	596.035	435.541	397.289	286.726	443.784	474.591	47.6018	725.4	409.6	642.816	54.242	308.297
52.9548816343051_954.229058217514___4231	12.8606	431.742	92.2891	37.4664	82.4637	199.162	416.154	274.165	62.2095	95.9798	165.689	237.521	1164.2	527.045	2873.87	117.835	736.637	385.792	962.481	26.1769	859.26	501.136	545.519	869.638	173.164	186.747	89.0167	77.1302	149.784	150.436	38.0359	148.322	62.8802	121.572	36.049	145.119
53.023178948356_475.397938084298__[M+Na+K]2+ 44.0932_10	226.141	108.859	74.5793	50.3823	57.9078	52.5268	37.5071	55.1546	43.5	25.9725	19.4215	16.0447	13.7519	42.0492	39.0117	27.7512	23.2706	7.79244	27.0682	9.82208	8.67096	0.0423771	9.90823	12.992	110.939	169.156	126.385	32.4009	17.6507	26.323	4.63468	20.0185	11.1951	29.3596	4.38479	21.3452
53.0255079949121_331.477011785462___3347	68.2974	74.4177	49.1125	16.5851	57.2094	74.9562	6.16185	54.4497	47.6712	19.2353	19.1811	21.1224	32.1379	90.1135	66.9536	61.1607	37.3299	27.2616	31.5946	22.9389	13.0234	18.5111	19.8158	39.0351	19.5989	35.2812	11.4114	37.8692	29.5036	52.7257	27.856	50.1356	11.2181	23.5021	21.9327	7.13074
53.1354896969332_954.206185686189___4247	17.1475	361.061	92.2891	4.16293	63.5299	246.84	416.316	186.238	66.9949	96.145	111.634	163.704	331.651	529.773	3438.07	159.869	782.785	391.989	813.407	22.9048	801.95	481.211	526.739	801.387	133.203	208.62	110.686	93.6581	173.749	80.5908	23.7725	61.3747	51.5344	96.3706	45.135	109.394
53.1421807637413_975.913978047287___80	47.2014	1089.9	457.12	41.5455	326.939	991.484	2292.19	1254.09	385.745	489.269	877.09	1655.18	126.875	133.001	298.687	72.5838	59.9604	94.3708	68.0108	13.0061	104.281	115.937	179.171	185.099	583.737	413.697	430.2	273.199	564.987	291.759	42.8416	652.843	348.576	626.882	63.1738	273.359
53.2052578484219_331.407545543349___68	17.0743	20.7573	24.5562	4.14627	38.0886	34.5493	18.4855	9.89995	14.3014	6.40304	25.5748	10.547	22.9557	47.9974	44.6357	33.3161	32.6186	19.4474	18.0266	9.83098	26.0053	13.8833	24.7369	12.9938	0.0597342	14.1125	5.70572	16.2297	23.6029	47.4532	32.4987	20.0542	5.60904	17.6266	17.5461	14.2615
53.3236368840637_976.653513414311___80	59.2936	643.303	249.542	78.0233	314.493	757.882	1325.46	749.102	228.24	958.901	643.839	1061.3	106.003	102.925	115.478	129.884	92.2467	86.5066	77.079	16.2576	160.19	142.165	99.6912	133.88	624.316	583.13	534.505	453.882	626.038	541.931	42.8416	802.82	387.523	746.14	49.6299	274.758
53.3166524487437_955.113314176665___4220	33.8521	228.275	60.7271	4.10879	43.8507	176.664	268.975	116.68	28.339	44.2856	122.183	162.228	609.297	470.791	1556.38	672.177	493.044	248.273	493.633	36.4549	856.404	467.808	445.074	586.446	202.304	134.847	112.971	121.227	101.852	127.121	52.3026	144.454	120.044	109.272	40.0771	116.077
53.3295883329724_1044.54897099603__[M+H+NH3]+ 35.303_5	76.1248	165.415	176.94	65.7922	215.743	138.041	128.348	137.737	219.335	172.081	229.075	182.585	223.532	167.718	205.615	139.279	125.716	235.677	108.469	65.3004	133.676	174.307	190.841	228.025	335.652	465.433	202.728	336.521	172.65	198.066	436.13	325.493	368.505	245.34	164.919	374.829
53.3938691967045_484.121162968332___110	268.46	221.17	264.997	127.871	96.047	102.852	43.4419	19.9444	33.6541	19.3688	38.5958	37.2352	27.4036	23.9072	27.7734	16.5966	18.5793	19.412	17.9893	6.52425	30.2158	0.0423771	19.7393	17.262	118.942	92.6753	45.4209	32.2924	17.5826	31.4889	9.33822	19.9707	11.1728	23.7056	22.1243	0.0652299
53.41487557033_501.771226812011___16	69.3404	33.0024	91.8208	62.0478	44.4488	28.8098	0.0559893	9.88394	9.5317	25.6411	6.38343	5.274	4.58993	24.0266	16.7345	55.5641	28.0197	74.0518	9.03253	62.5059	47.7411	13.8834	9.9023	4.33502	26.1214	56.3202	22.8265	148.066	135.41	76.533	18.5316	10.0309	0.0513705	11.7482	4.38393	7.11822
53.504328991519_976.733265026884__[M+K]+ 14.5368_80	21.1763	351.16	230.046	57.4908	265.484	453.646	636.946	456.098	93.4016	677.875	303.964	693.702	32.3913	36.3834	66.4232	156.306	88.7887	59.0702	95.198	26.3595	108.607	69.7759	84.8584	105.3	390.247	493.418	334.652	406.441	712.484	261.592	61.2326	538.897	263.287	488.964	49.0422	167.479
53.5030212326937_955.113314176665___4239	12.7094	97.8323	48.5817	24.6806	50.1669	91.4193	128.566	102.994	28.3715	69.6723	69.3719	93.9884	278.565	262.842	632.707	599.316	238.827	150.686	285.686	19.9166	541.339	311.021	286.833	250.271	125.073	120.652	120.902	92.5682	100.635	90.247	42.2795	85.944	50.8304	162.58	40.0771	43.0056
53.5915071006592_499.997682874895___16	80.9175	49.4925	85.7	66.1839	44.401	69.0525	24.5854	14.8259	23.7976	12.803	12.753	10.5338	32.5506	18.32	39.5553	56.3675	33.1138	35.5409	54.9754	92.7331	57.2703	18.7783	25.1118	4.40049	33.0722	42.2409	51.3598	184.534	100.088	63.1725	18.5228	20.0616	22.4495	11.748	8.76997	28.4737
53.6851420058005_977.580227977042__[M+Na+2K]3+ 60.1315_80	84.8036	161.89	109.382	45.2193	113.086	204.82	280.444	254.261	75.7009	442.066	188.909	345.863	92.695	66.6785	117.639	95.0424	70.2095	51.1832	81.7417	26.4013	122.767	92.8815	114.596	108.814	352.172	361.153	198.432	251.793	361.84	297.535	70.5386	311.599	158.102	354.746	75.7926	114.892
53.679820239894_956.425012702766___4228	29.6583	163.28	48.6299	41.1362	56.501	74.2783	60.8242	58.8603	47.2773	88.6807	44.1474	114.889	111.636	134.58	261.028	357.124	94.0255	106.901	141.479	33.176	249.598	140.262	160.802	195.135	165.146	127.767	115.157	92.5794	128.537	159.719	46.9789	60.6708	56.4171	124.832	53.4515	64.5118
53.772960538693_501.457488318289___16	78.5232	33.0024	24.4855	41.3142	25.3356	40.2309	12.2922	0.0451426	9.50777	12.7869	0.058061	10.5211	13.7354	36.0399	27.853	34.8397	51.3002	27.224	27.0976	71.5825	56.3323	4.6221	14.836	12.9835	19.5366	14.08	39.8928	175.857	57.8167	45.0703	18.5316	5.00881	22.4293	23.4627	13.1327	0.0652299
53.9541151959898_500.794353872111___750	29.8508	24.7809	49.0356	37.2775	25.4057	5.76195	6.14636	9.89717	0.0434681	12.8202	6.38381	10.5476	4.58998	18.0444	5.6623	11.1282	9.4803	31.1914	27.1329	32.7613	74.7436	4.63382	0.0454262	4.40049	32.645	14.0803	28.495	64.8245	17.6626	47.3794	9.26142	25.0436	11.2095	17.6454	8.78179	14.2369
54.1093627102766_426.632474629718___3931	312.731	557.848	418.861	45.3803	56.8554	91.7951	55.1788	49.2501	61.6371	25.5116	25.4121	20.9962	36.6061	36.3493	28.1613	28.0241	9.4238	11.7799	9.10587	33.0302	21.879	9.33743	24.9696	13.1314	39.0635	56.2079	45.4987	26.9338	29.3567	47.2573	27.7153	24.9894	27.9604	35.0891	8.72614	42.5862
54.1261910230983_483.724995266643___110	238.605	155.265	171.528	86.5786	38.1357	57.6374	30.7466	9.88022	38.1094	38.4387	31.9123	36.9452	4.58211	24.008	16.7456	11.1004	14.0011	23.3729	13.5384	29.463	8.6842	9.25733	14.8632	8.67389	45.7018	35.2064	39.9301	38.8486	23.5213	47.4601	18.5306	60.2044	11.2266	11.7452	26.305	28.4546
54.3052764562429_483.05886955524__[M+H]+ 53.293_110	157.45	219.31	140.519	31.6348	69.7169	34.485	42.9924	29.6052	57.093	12.781	12.7481	68.4345	18.3071	17.9838	55.6726	11.0875	18.6196	31.1259	9.015	3.26959	4.33089	4.62321	9.89693	12.9765	65.1235	37.919	79.5679	43.1587	29.3625	36.8166	23.1344	20.0149	22.3946	17.5957	21.8939	21.3145
54.293840678904_426.632474629718___81	411.861	412.503	407.919	41.2139	31.5861	45.8873	55.1788	19.7	23.7073	31.8829	31.7651	20.9917	18.285	30.2911	11.247	0.0508358	23.5225	7.7639	31.5007	3.2613	8.75162	9.22015	14.8078	0.0395657	71.5427	28.0755	28.4071	43.05	11.7427	26.2271	4.61921	29.9545	0.0513705	23.3927	13.0892	0.0652299
54.4048914429735_1073.22417363273__[M+H]+ 53.3945_55	159.586	211.084	204.812	125.221	148.782	158.064	105.791	98.8499	158.7	129.666	193.966	58.4626	220.112	170.225	324.1	215.861	110.914	73.0263	204.424	61.8143	112.285	115.106	137.513	211.892	256.278	586.409	194.033	153.283	179.168	187.034	254.737	111.228	231.852	161.18	229.486	186.913
54.476673904862_427.533995099549___81	247.682	197.391	262.201	61.8823	6.31722	22.9436	24.5239	44.3251	47.4147	38.2594	31.7651	15.7438	31.9987	12.1164	44.9881	22.4193	14.1135	15.5278	9.10587	9.78389	26.2548	9.22909	9.98783	8.74069	26.0155	21.0566	17.0443	21.525	11.7427	15.7363	32.3345	19.9697	11.1701	17.5445	13.0892	21.2707
54.8349092427785_490.662725392858___2556	46.7351	24.7597	18.3487	82.6693	149.499	103.476	141.012	103.414	109.042	51.1381	76.3896	15.7905	9.1532	30.0136	16.9269	22.1998	14.1589	15.5646	18.0364	13.0766	13.168	13.8748	4.9473	13.1551	39.0796	70.3396	34.1304	48.5452	29.3678	31.545	4.62602	15.016	0.0513705	29.2972	17.4886	28.422
55.022553057255_324.651308512344___2907	56.3032	75.3998	68.3946	81.6338	121.797	97.0267	49.2191	70.3301	48.3188	45.4601	19.1791	26.7489	41.2677	18.0068	16.7158	22.2064	27.9523	31.1169	13.5328	22.9136	26.0062	9.25272	4.94742	4.33078	6.52181	14.0903	22.7822	26.9865	5.89125	31.6003	41.714	40.0628	16.8043	23.4755	39.4191	28.4845
55.0151935577393_491.812313013448___4331	38.2455	68.8254	48.874	101.026	75.951	91.8723	98.1165	78.8539	101.29	57.4628	79.5764	104.509	4.57164	0.0549343	16.6768	0.0508358	18.6015	15.5441	13.5161	19.5916	21.6286	4.61974	19.7641	12.9599	58.5556	56.1959	39.7826	5.38795	17.599	26.2586	13.8486	19.994	16.7794	11.7193	13.1168	7.0995
55.0564248256786_982.522295396986__[M+H]+ 54.0493_1	1674.52	1662.21	1317.95	1391.55	1500.12	1341.58	1075.64	1233.58	1358.82	1510.77	1366.67	1444.82	1082.12	861.785	646.234	975.136	843.076	827.877	810.384	865.33	915.495	1055.4	1179.33	957.445	1338.06	1562.48	1428.11	1176.52	1168.6	866.096	1371.09	1021.76	970.041	1604.2	1403.52	1290.06
55.0563573274796_928.300763160291___94	664.692	753.329	446.003	490.437	424.282	429.548	426.552	437.947	161.499	584.49	438.948	638.37	470.825	338.238	267.962	405.332	342.507	300.401	349.002	366.459	441.687	318.822	401.211	358.679	817.995	1058.59	690.826	657.328	522.792	520.799	638.489	639.708	543.559	1074.82	719.184	937.505
55.0562445212484_890.85544659667___4	483.778	584.327	477.936	418.925	361.525	393.332	271.587	336.956	400.129	507.885	388.65	470.61	229.124	231.398	127.912	188.504	223.336	213.093	207.468	187.79	361.249	379.234	291.945	216.76	685.025	654.252	590.616	505.317	515.233	356.26	539.004	484.844	385.119	895.773	547.736	548.929
55.1353051512388_1046.63701526035___5	72.6519	302.783	212.35	58.1609	173.096	247.854	172.911	158.588	143.038	424.39	259.406	89.5979	150.64	274.313	407.436	183.498	246.569	175.568	299.509	91.1615	306.39	205.311	283.311	210.693	277.429	485.673	160.41	208.608	263.082	234.535	141.893	194.055	393.605	128.404	117.085	281.87
55.2149262059592_324.730228792452___2908	47.4502	50.1715	43.4548	29.3423	64.2778	34.9839	24.5796	30.0266	4.82192	6.48263	12.7683	21.3592	9.15981	17.9805	11.1294	0.0508358	0.042614	11.6546	4.50448	19.6155	21.6455	18.4798	14.8248	8.65037	13.1854	21.401	5.75755	0.049469	0.0539793	5.32345	14.0536	10.0034	11.1896	0.0539001	17.711	14.4208
55.2231859902894_480.417564520746___110	483.392	340.296	457.096	214.832	150.92	193.806	49.1345	74.065	110.867	44.7367	39.2417	101.737	90.2843	89.935	155.548	94.9149	122.749	112.943	31.5296	13.0789	30.4501	23.1166	14.8481	17.2989	84.6833	152.54	149.493	203.121	81.6282	148	41.6336	94.358	39.1911	58.6641	8.75735	21.3202
55.322355712322_1056.64312817801__[M+K]+ 16.3549 [M+3H-C6H10O4]3+ 309.003_9	67.7208	417.4	419.062	78.1846	289.259	213.661	97.9628	128.061	444.755	384.709	385.76	83.5751	306.602	338.549	446.985	187.471	224.812	137.781	275.418	65.3209	265.13	340.171	513.938	302.937	308.008	461.255	182.13	469.38	140.654	264.903	1124.1	253.536	332.072	111.048	74.0048	229.712
55.404516470435_481.761457976465___110	437.133	430.94	478.674	186.51	184.805	149.314	164.161	105.012	85.9303	44.7909	95.5898	83.639	112.188	129.59	89.1888	111.832	90.4512	89.7437	27.0705	9.82132	13.0086	9.25514	19.8223	25.9538	58.6261	56.3428	62.587	74.8193	132.396	111.028	25.4949	65.0477	39.1907	41.1052	4.38409	42.6903
55.5050570581595_1057.41278473373__[3M+Na+K]2+ 16.3549_9	54.9721	507.012	416.977	53.4887	328.162	138.288	152.925	151.87	380.36	272.89	442.544	67.8827	326.036	202.756	411.992	126.572	259.346	161.176	355.584	54.8105	200.483	323.26	218.684	269.541	214.231	434.558	174.994	389.85	158.096	299.722	1045.56	134.084	402.377	151.944	104.477	317.974
55.5824728014504_476.854301808088___10	232.774	174.764	311.479	123.689	57.0998	74.7934	30.7494	64.2726	61.9293	44.7949	50.9019	21.089	23.2491	113.918	33.4467	56.3145	46.6649	20.197	18.3063	9.96321	13.1964	9.39161	20.1115	21.9638	144.184	172.252	126.029	85.1195	47.737	52.4681	0.0425389	64.0568	45.4936	23.8268	31.1373	14.4348
55.5840382576747_414.543004442972___38	126.649	106.923	186.522	90.8309	75.8139	63.1119	73.6115	54.2199	61.6305	44.6573	38.1298	36.7399	37.0157	48.5596	73.0915	16.8299	32.9844	27.5373	18.2503	19.8464	13.1397	28.0424	25.02	34.9907	46.1233	49.1901	28.7548	32.3075	29.3929	31.5004	36.9907	20.2211	11.3184	58.5686	21.842	28.4169
55.5841851281333_323.445604402224___2909	43.1264	8.36131	68.2837	62.8764	45.0034	40.8147	12.4595	10.0093	33.7615	6.48268	6.46411	5.34004	32.0172	17.9847	0.0509082	5.54358	4.65287	11.6546	9.01076	3.26548	0.0396735	13.8444	14.8249	8.65049	6.51383	14.0698	17.0663	10.7817	5.88418	21.0398	9.25848	14.9881	5.58845	41.0333	13.1092	7.11235
55.6866170109128_1056.62679872188__[2M+Na]+ 16.3549_9	46.5148	400.68	213.82	41.109	292.885	223.429	128.576	93.5827	274.298	247.065	360.42	124.11	171.427	167.982	239.09	82.6211	198.35	126.183	315.211	54.8104	217.404	381.969	183.632	219.716	252.044	438.85	141.238	284.61	122.964	258.683	987.576	191.155	166.468	152.103	69.5821	323.788
55.7554451372715_475.272247170913___10	82.2512	58.7349	80.9552	37.8637	45.1288	35.0866	12.335	15.0761	19.3726	6.50454	19.4215	0.0480593	27.5401	42.0492	11.1613	27.7939	32.6192	0.0356921	13.5514	9.83553	4.33548	9.26984	0.0454262	12.992	127.63	98.5824	121.463	48.6014	23.5343	36.8522	18.5387	5.01091	11.2116	17.6437	17.5629	21.3452
55.7755203251133_415.080653700985___38	106.818	74.1029	167.135	104.842	12.6481	86.1866	67.4779	44.3702	47.4658	63.8621	38.1322	47.2866	13.7235	41.983	61.946	22.1469	0.042614	19.4081	0.0413265	26.1163	17.3098	13.8381	34.5571	38.8969	32.566	7.02715	28.4239	21.5383	29.3929	31.5004	27.743	34.9791	22.3766	29.2612	30.5485	21.3127
55.7899310322711_633.345235264265___1291	4.26437	8.23482	30.6236	329.034	313.319	506.998	6.13363	186.078	45.7119	163.023	268.023	235.604	4.58289	18.044	11.155	66.2161	174.339	23.4055	27.1213	9.81836	13.024	4.62918	4.96304	0.0395657	6.52674	14.0882	17.1133	310.355	41.2098	237.203	289.403	361.76	177.212	17.6663	0.0402583	7.13263
55.8824452442978_633.351928390686___1292	21.3218	8.23482	36.7483	381.612	743.858	716.572	633.404	962.496	932.463	158.848	460.133	332.481	22.9144	30.0734	33.465	276.91	339.113	218.502	45.1284	9.81836	41.5747	4.63516	19.8522	30.3295	13.0535	35.2035	17.1133	597.238	567.131	1189.81	299.27	1088.63	443.057	11.7775	8.78515	0.0652299
55.8758523329136_1053.28527097509__[M+Na+K]2+ 49.8045_3	67.7332	384.793	213.861	49.4021	158.814	232.945	116.334	147.81	162.661	271.01	236.238	52.2518	321.698	252.415	211.264	196.972	173.442	155.025	270.661	88.2309	191.369	232.589	168.71	117.141	235.934	327.354	159.889	323.608	136.414	200.436	419.73	165.697	224.396	136.276	102.631	292.738
55.9371552732298_1193.58106078495___8132	0.0389307	0.0751286	0.0558956	0.0378092	0.0579095	0.0525653	0.0559893	0.0451426	0.0434681	0.0583543	0.058061	0.0480593	197.585	108.413	0.0509082	166.986	154.436	82.3954	158.305	135.944	143.472	88.4782	0.0454262	0.0395657	0.0597342	0.0645454	0.0522024	0.049469	0.0539793	0.0482588	0.0425389	0.0459168	0.0513705	0.0539001	0.0402583	0.0652299
55.9471066753151_327.879505731783___2910	63.851	74.2439	42.813	53.751	50.6657	45.959	67.5173	44.4264	14.2497	25.5759	6.37609	36.8705	46.4188	36.4503	45.1327	67.454	37.7365	43.3322	28.6846	36.4579	39.5068	32.7923	35.0689	17.5385	45.6071	77.4207	62.5912	59.3405	41.1805	111.793	65.5957	70.9754	68.0466	70.3288	115.117	92.4643
55.9741925465746_633.215934852587___1293	8.52874	16.4696	32.4083	603.079	515.85	918.415	537.967	650.056	393.097	420.405	654.273	456.141	13.7487	18.044	16.7325	270.005	351.747	146.097	54.3234	32.7279	8.68267	13.8875	19.8522	12.9983	13.0535	56.3529	39.931	684.939	418.759	1163.48	601.392	1096.47	468.396	35.3326	17.5703	21.3979
56.059434056282_983.176683650905___1	137.917	245.999	170.402	153.037	127.65	116.034	129.632	134.489	123.984	128.772	134.487	199.218	120.09	113.564	78.1865	159.725	83.0988	149.559	67.2128	58.5743	269.651	258.807	274.783	163.926	219.192	263.227	161.177	120	164.138	137.971	93.9474	153.2	107.176	222.74	125.321	200.849
56.0689509392833_633.408004819055___1294	25.5862	24.6697	6.12472	215.742	400.064	599.379	421.906	686.015	500.081	346.341	401.129	199.157	13.7313	42.0389	27.8875	183.95	310.15	169.369	22.6011	3.27279	26.048	13.8875	34.6972	25.9612	26.0657	77.4852	11.4089	396.312	332.546	835.198	213.303	598.519	376.916	0.0539001	4.38565	21.3695
56.1326426100967_398.870390025647__[M+H]+ 55.1206_8	72.345	41.7095	42.8226	20.6724	12.8291	11.644	43.5611	34.5217	4.81435	32.3937	38.74	58.655	18.285	11.9967	27.7901	0.0508358	23.2766	7.77439	17.9997	3.26331	8.65668	13.8455	4.94133	0.0395657	82.7838	56.2802	82.8078	32.3258	23.5386	36.7603	18.5135	34.9705	33.5325	23.4372	21.8643	28.4442
56.146384810704_329.511544307771___3348	59.5935	49.5575	61.3212	31.3225	31.7405	46.0678	36.9221	19.745	38.0884	12.7882	0.058061	5.27337	9.15933	11.9987	0.0509082	16.6339	13.9764	11.6714	0.0413265	6.53822	8.67072	4.6217	19.7895	8.66094	13.03	7.03822	17.0696	16.1831	11.7823	5.25873	13.8887	19.998	5.59461	23.4429	4.37658	21.3379
56.1619644517566_633.402882258344___1295	12.7931	8.23482	12.2494	163.294	222.417	286.834	193.129	276.861	421.562	215.624	217.515	185.863	13.7487	18.044	11.155	89.0116	216.42	65.8663	18.1092	26.1823	21.7067	13.8875	34.7413	4.33278	19.5802	28.1764	22.8177	289.551	268.335	475.41	195.626	489.516	150.047	23.5551	4.39257	14.2653
56.251850834117_1069.3374820212__[M+Na]+ 33.2669_55	71.4739	327.058	159.221	141.785	127.531	171.365	167.696	138.251	110.822	214.835	141.342	146.694	513.869	454.314	237.215	145.258	186.101	164.359	166.085	51.6565	109.742	243.01	147.456	200.591	265.642	318.765	201.337	168.25	243.352	259.188	222.432	154.524	282.101	267.871	115.419	154.855
56.3047015380859_424.390659369266__[3M+2H]2+ 36.8721_81	259.032	107.049	225.663	121.336	107.476	80.4062	49.1567	64.1616	52.2091	51.0976	44.5144	52.5548	4.63521	30.3936	28.1606	16.8675	14.1364	7.87789	13.7079	0.0299218	4.38988	9.37025	20.0419	4.38456	26.3866	42.7051	34.5753	21.8231	35.7317	10.6412	23.4258	30.3844	22.669	47.5418	22.163	43.1492
56.3137579639911_399.480317240081__[M+H]+ 55.3103_8	110.764	41.709	55.7365	37.7158	57.7171	29.1043	24.887	50.0051	19.2573	6.47868	6.45659	53.3224	22.8513	11.9969	16.6742	16.6064	32.5798	11.6519	13.4867	13.0503	25.9703	4.61435	4.93611	8.64039	117.249	112.587	56.833	16.1589	23.5386	31.5089	18.5136	34.972	16.7662	23.4421	43.727	28.4431
56.3258223049671_329.976008105969___3349	29.797	16.4985	85.7431	8.27301	12.6807	28.7563	12.2924	9.87292	19.0213	12.7883	6.37716	15.8009	22.8983	5.99215	16.6946	5.54486	0.042614	3.88566	4.50342	9.79601	12.9902	9.24158	19.7664	8.65022	6.515	21.1147	28.4494	10.7888	0.0539793	21.0349	13.8887	24.9697	5.58721	0.0539001	17.5063	21.3379
56.434356575958_1069.46626609315___55	59.6007	315.075	165.51	183.232	175.471	251.818	189.474	88.9857	180.39	217.673	162.732	121.759	277.758	359.113	256.658	150.649	256.009	144.114	148.706	71.0277	214.526	306.431	221.655	179.324	256.366	205.21	173.035	177.833	106.677	278.46	261.848	129.766	156.209	135.108	104.908	198.794
56.607334850644_1071.55024373491__[M+3H-CO]3+ 194.793_55	34.5032	215.846	245.912	211.43	220.095	170.089	118.484	80.2383	72.1359	372.031	189.774	53.1458	363.069	216.062	375.764	194.106	191.868	100.685	170.422	48.5523	92.1371	118.474	85.9454	159.687	142.667	316.263	181.437	148.084	118.401	158.126	73.8739	167.33	151.769	61.5378	56.8503	184.377
56.7968221005259_1072.3530035895___55	85.1563	167.15	208.522	51.1372	121.01	105.565	155.854	90.2688	80.7009	149.417	244.689	99.7079	337.891	137.296	372.728	105.303	233.861	107.446	148.631	51.6601	125.412	128.588	103.274	215.017	125.071	204.547	132.444	158.467	173.561	123.056	126.607	78.4434	101.895	119.201	71.1023	179.675
56.9926092632509_1109.48944325794__[2M+H]+ 27.9937_19	134.976	124.67	155.253	138.181	124.2	195.32	49.2223	149.037	123.53	147.573	64.0124	180.153	131.839	77.5818	256.753	44.4321	102.097	95.2288	54.0072	58.3682	108.329	101.763	79.0165	103.595	199.094	282.682	178.851	200.34	99.4695	221.793	101.11	110.32	50.3255	252.718	96.4034	142.223
56.979013747551_1072.66313623065___55	72.3829	365.394	199.14	102.716	134.329	127.554	135.655	79.2101	95.0805	162.179	234.89	99.7079	262.993	119.107	265.533	105.437	219.311	128.092	118.207	62.0554	127.904	142.714	141.738	162.618	207.02	305.711	198.022	147.538	131.667	165.565	131.296	140	117.338	184.761	115.541	193.82
57.0720330517315_982.781415745629__[M+2H]2+ 112.128 [M+H-C4H8]+ 112.128_1	334.298	435.161	219.347	330.106	339.652	336.154	359.401	272.467	335.478	405.19	365.332	343.136	225.851	269.215	154.87	266.228	204.316	225.631	218.058	255.602	247.81	230.181	261.151	200.002	308.812	386.364	328.499	278.094	326.228	260.674	376.664	273.658	318	396.664	508.16	293.101
57.0719180569039_798.028200586971___1924	46.8637	484.232	124.293	86.7349	25.2835	80.3855	30.6054	14.7937	9.49281	38.2398	19.0489	31.5212	18.4892	18.0965	28.0813	261.89	14.0854	31.3705	22.6845	23.0914	30.4643	23.296	34.8884	13.0947	463.737	739.868	91.1183	364.942	64.9237	341.138	153.416	45.0977	78.6919	552.996	254.907	71.3412
57.1664632770055_1072.94015583178___55	55.4316	133.206	112.174	57.9988	44.7764	98.5644	55.4952	49.5804	80.8175	96.3278	99.4849	78.8306	81.7143	119.261	214.577	88.7892	50.9646	57.7987	98.7735	48.4946	103.922	99.1226	111.948	133.73	156.015	169.181	106.881	75.5192	106.314	116.266	207.044	100	94.9879	105.894	83.3196	199.123
57.1799278674307_1109.39452659006__[M+H]+ 56.1763_19	171.965	107.899	167.972	196.369	170.381	196.037	146.66	159.222	128.753	102.522	89.496	156.133	227.998	59.6025	174.535	77.6554	60.2466	77.0988	58.4286	34.4875	46.1319	64.6714	118.991	51.7277	232.229	388.681	152.904	199.235	209.2	244.069	82.758	50.3094	67.0111	228.213	154.28	126.558
57.3647981617365_1108.86432340129__[M+H]+ 56.3587_19	165.912	91.8454	116.594	158.093	111.905	99.8784	109.49	98.8273	75.9451	83.2993	44.8117	74.6242	155.349	89.518	93.1885	61.1093	37.1263	106.042	40.5049	38.8563	34.7049	92.3877	64.2151	68.1863	176.92	236.068	133.386	111.436	70.7305	213.934	83.1592	94.7833	72.5954	113.647	109.537	127.824
57.4273216232829_419.382459493102___6247	148.827	74.191	122.482	45.4676	56.9757	86.2841	36.8571	54.3035	33.2678	31.9619	38.1749	63.1325	77.7712	65.9731	127.736	11.0885	18.6244	15.5442	22.5398	16.3431	8.65747	9.23998	19.7685	17.2968	52.1409	56.2535	34.1552	32.3502	29.4262	47.3135	32.41	10.0028	11.2015	41.034	17.4967	7.11041
57.4275852404894_399.417250503174__[M+3H]3+ 169.257_8	139.499	150.407	118.08	79.622	70.6598	87.4593	93.3443	90.0301	67.5133	64.7868	51.6399	74.6513	64.0546	29.9575	79.4441	16.6064	27.894	34.9557	26.9733	35.9292	43.236	13.8608	24.6805	51.7841	171.504	201.985	143.479	65.4078	23.8237	68.3453	70.2646	84.3209	44.7597	77.1134	48.6849	63.9969
57.6208793984637_418.232612804889__[M+Na]+ 34.6339 [M+H+Na]2+ 91.2486_38	110.384	57.7034	97.9858	66.1346	37.9842	23.0091	18.4286	34.5568	57.0333	25.5691	25.4499	15.7791	45.7967	35.9767	61.2096	16.6327	27.9367	15.5442	9.01592	22.8804	17.3146	13.86	29.6527	12.9659	19.5535	42.2104	45.5291	26.9586	11.7704	15.7712	18.5207	25.0142	16.8022	17.567	0.0402583	28.443
57.7284082348631_983.418410502916___1	25.6858	496.714	110.385	37.302	261.269	208.933	166.722	138.66	62.1218	172.796	407.05	110.801	668.042	347.544	823.042	93.3238	160.38	144.886	429.008	35.6553	209.336	434.27	102.878	394.919	659.971	280.247	133.392	104.395	107.544	156.76	47.3263	188.449	136.409	1146.57	71.8697	79.5141
57.7320963658962_1067.80625538228___6827	50.8733	401.859	363.726	78.249	163.657	146.955	92.07	69.1744	362.611	318.752	430.5	105.904	423.073	336.147	554.248	99.6168	145.786	160.393	349.54	45.1146	120.728	302.793	120.574	522.856	209.819	472.247	187.383	440.076	135.09	187.432	780.815	124.409	385.12	199.254	91.5236	177.057
57.7933610766577_416.648040852593__[M+H]+ 56.781_38	44.4149	49.4616	48.9807	33.0674	56.9905	74.7826	30.7138	39.4935	38.0226	63.922	44.5368	36.8192	22.8777	65.9414	50.0798	16.6322	46.5612	3.8858	13.5276	9.80542	8.65717	13.8527	19.7681	4.32201	52.1655	28.139	34.155	26.9587	23.5464	42.0569	13.8871	30.0171	11.2009	35.188	39.3581	21.3323
57.9196760499434_983.184871157043__[M+Na+2K]3+ 72.8441 [M+2Na+K]3+ 88.8193 [M+H-C4H8]+ 112.968_1	77.1616	367.853	178.892	41.4969	140.129	150.38	229.138	123.958	276.961	115.51	150.62	140.83	726.157	308.264	827.283	49.4455	124.389	131.2	375.468	38.9306	196	266.151	176.667	420.168	660.195	196.105	223.976	146.733	126.128	130.281	60.86	227.673	95.6832	1248.43	71.1574	107.382
57.937089658758_1121.51504067984__[M+H-CH4]+ 72.965_134	106.01	190.517	103.971	115.387	95.3718	86.5003	141.019	78.8373	77.7084	147.041	102.031	130.474	195.274	199.176	213.147	206.301	106.205	179.933	145.14	101.184	116.489	178.957	263.942	163.395	129.454	253.247	165.082	123.604	129.206	173.778	188.641	164.147	144.808	246.536	189.858	148.763
57.9242266362873_633.376090830096__[M+2H-CH2]2+ 127.851_29	17.0575	8.23482	24.4989	115.101	43.593	109.165	127.154	114.454	33.3057	95.9087	138.165	73.9996	22.9144	18.044	44.62	61.1687	88.5967	26.201	18.0809	19.6367	30.3893	18.5167	4.96304	8.66556	19.5802	21.1323	11.4089	159.462	140.495	217.159	146.923	186.517	100.834	11.7775	35.1406	28.4926
58.1054874295074_984.215328708749__[M+2H-C5H8O4]2+ 246.236_1	47.0907	450.753	353.565	66.3951	152.413	138.58	129.049	114.041	132.742	383.48	259.823	94.9722	301.553	545.264	591.77	282.489	147.678	149.137	340.155	16.2073	311.301	431.007	159.133	272.119	334.951	460.761	183.422	284.283	131.442	156.529	51.4969	241.545	157.459	705.534	35.9348	121.587
58.1053450568829_1044.01562873023__[2M+H]+ 28.5409_5	46.6011	290.068	215.671	57.6697	221.273	170.491	116.335	78.8626	201.85	363.537	534.988	115.04	221.76	195.679	206.352	77.2681	119.849	118.788	228.311	38.7887	82.019	314.589	687.26	509.696	186.019	346.584	95.9234	186.811	169.687	173.368	194.175	168.673	155.164	228.211	99.9872	204.64
58.1847019221977_414.223073252272__[M+H+NH3]+ 40.1463_38	138.439	57.7746	79.6962	62.0015	57.0594	40.3072	79.8382	64.1489	33.3102	44.8096	31.8548	31.6043	486.284	371.693	327.977	460.67	538.502	486.983	283.895	251.821	267.851	229.141	294.329	243.253	229.236	319.29	203.445	352.664	364.235	338.432	205.719	319.802	183.951	194.551	222.988	164.328
58.2939255228628_984.134379485201___1	67.8513	179.941	121.426	62.4343	95.5514	144.796	117.09	64.6437	66.292	330.527	127.834	95.2668	99.3087	347.742	209.953	252.413	139.396	112.289	191.786	38.9673	212.727	272.861	149.234	200.232	263.729	357.863	109.138	89.01	118.294	111.483	70.3145	131.409	96.5804	361.793	57.8153	64.5065
58.2959042537334_1043.87935148017__[M+Na]+ 35.303_5	80.4928	308.192	214.181	24.7156	295.673	172.291	134.703	133.081	227.769	312.841	354.807	88.8942	569.531	130.449	155.535	110.383	101.411	202.768	169.23	71.1126	103.603	345.332	593.69	297.438	205.725	240.113	135.385	182.347	117.025	196.641	174.372	311.774	155.315	353.546	73.9036	176.411
58.372603967734_414.119049559498___38	47.3956	57.7018	36.7828	112.26	63.3248	51.7371	36.884	49.4047	47.518	44.8096	25.4838	31.6043	400.648	288.235	304.347	321.428	379.599	453.103	254.941	272.117	283.091	174.216	201.956	145.745	185.264	194.562	286.51	323.153	316.958	275.749	205.502	301.829	212.265	210.176	223.389	171.555
58.4842672562996_1040.35906301027___5	60.011	259.958	105.094	20.8392	152.593	180.65	142.473	119.641	139.422	213.462	383.94	95.1694	237.265	90.0442	183.913	89.4047	97.9657	146.279	157.947	62.1623	113.793	283.32	466.499	224.155	381.688	477.716	158.326	173.537	159.724	175.332	125.314	305.291	183.096	185.188	101.187	470.86
58.5377554385591_475.48055407973___10	139.316	115.731	92.0244	53.8783	58.0227	58.4776	25.0047	59.394	33.902	45.5318	19.4215	26.7949	45.9001	6.01502	16.742	11.1005	18.6645	11.6887	13.5341	19.6442	4.34121	0.0423771	9.90823	17.3472	146.712	149.433	165.893	64.9049	53.0331	31.6312	18.5387	55.1954	39.2955	46.9754	17.5392	14.2489
58.5626745277576_414.103423148527___38	68.1428	33.0153	85.8266	74.4921	37.9949	34.4914	24.5894	34.5833	28.5108	31.9677	19.1129	21.0433	186.226	216.186	184.363	233.798	247.155	187.983	127.793	109.183	162.819	107.477	126.146	98.5022	167.477	98.6086	99.3284	137.855	135.668	187.181	130.64	119.535	117.998	152.398	93.0238	78.3319
58.6646899947494_1038.22323879261___2278	47.299	256.664	169.166	41.808	206.864	175.793	186.453	125.007	135.824	250.453	346.685	116.701	220.044	160.515	252.622	99.6091	92.3941	153.769	112.116	45.3553	73.5639	230.873	204.689	214.033	288.608	514.487	102.057	168.671	229.046	234.491	123.144	331.532	177.999	154.343	48.5424	283.663
58.7236731890483_475.617838750981___10	128.792	50.1491	81.475	16.7628	12.8684	11.6721	18.7158	10.0098	9.6643	12.9833	12.9222	16.0446	9.16769	11.9966	11.1489	0.0508358	4.65989	3.89131	4.50599	19.6439	4.33024	4.62233	14.8446	12.992	182.321	184.535	122.074	37.8011	23.5343	36.8522	27.8081	20.0436	5.60582	23.7777	17.7592	42.6904
58.7535255941715_414.069554335721___1740	51.1071	16.5077	53.1236	45.9658	12.68	34.533	30.7367	9.88094	33.319	19.2039	19.1129	31.6027	95.9691	79.1879	95.8243	106.775	103.648	98.462	41.215	49.7922	57.1365	60.9638	70.2981	48.2801	58.838	49.3043	22.8232	53.9826	64.8146	110.663	50.9934	55.8796	28.4411	86.379	21.9022	42.7265
58.8563657630927_1038.13649025669___2303	47.299	279.803	179.823	66.8927	122.565	122.701	130.517	55.003	204.23	295.326	174.548	79.5687	176.878	130.79	249.576	83.0075	46.197	116.318	71.7543	71.1888	108.182	186.201	194.142	171.047	255.642	578.299	329.689	212.199	195.809	173.699	74.5139	253.998	151.939	148.406	57.3683	519.693
58.8729639200212_1008.2797485116___1446	21.5161	92.0796	43.2676	29.2431	51.3326	69.9119	55.6932	39.9646	72.0447	45.2127	90.0747	58.3546	418.415	65.618	88.5536	28.0318	36.9736	73.3271	44.8801	29.2215	218.74	299.196	391.371	136.268	92.3542	128.734	69.0946	60.106	35.7747	58.7947	84.6267	75.9919	45.3171	161.551	40.0464	72.0196
58.9239017567818_475.096877876232__[M+Na]+ 35.9362_10	117.339	83.7379	90.9892	103.05	57.8029	52.4303	12.4515	35.0984	62.7022	19.4438	32.2484	64.0611	4.57833	11.9831	5.56749	16.6091	9.30823	11.6739	4.50116	13.0796	4.33027	4.62233	4.94821	17.3012	39.0868	91.4319	114.48	53.936	11.7532	36.8011	9.25809	20.0185	16.7927	11.7297	8.86466	21.3143
58.9450710358757_1123.71319700472__[M+H-CH3]+ 72.965_134	98.7921	66.2705	91.8434	41.7	70.0182	57.7337	37.2842	64.8952	57.4946	64.7806	70.2271	58.2233	95.0717	65.375	110.497	110.672	55.4696	73.0323	67.2232	74.2751	116.659	112.395	128.516	134.79	77.7613	133.444	141.731	80.6022	58.7275	84.2527	126.786	49.7407	50.1245	129.118	135.844	56.6463
59.0115150103847_128.374030424648___5722	0.0389307	0.0751286	6.16339	45.7772	234.138	63.8446	159.444	119.494	52.7205	109.569	108.03	63.6887	0.0419457	299.519	0.0509082	384.559	460.242	76.9864	563.92	38.826	0.0396735	283.199	0.0454262	38.5282	323.245	0.0645454	16.9253	337.534	106.304	463.049	111.91	124.092	399.781	52.4516	0.0402583	91.6734
59.0505632630328_1042.14433320708___5	144.213	329.823	270.257	184.537	323.627	173.252	284.81	231.698	181.395	452.278	233.192	188.636	223.538	193.683	234.899	185.588	135.656	201.108	198.359	122.541	191.897	438.688	370.04	236.927	776.413	2972.08	597.592	632.378	1467.2	2123.58	314.437	813.252	918.456	423.523	343.411	1480.41
59.2347621918969_1046.83488207798__[M+H+HCOOH]+ 12.214_5	80.4991	198.693	170.934	61.7939	105.531	97.957	67.3512	88.7079	89.8043	178.819	202.193	88.8479	144.671	100.802	111.445	71.7808	74.7107	162.949	71.6017	39.2928	144.725	236.492	147.054	113.024	234.76	296.271	101.539	134.079	160.48	191.56	110.13	125.147	157.726	169.707	108.585	221.817
59.3165688822495_329.976008105969___3350	34.0535	16.4977	6.13212	53.7746	44.3806	40.2587	12.3074	14.8087	19.0442	6.39412	0.058061	10.5338	9.15933	0.0549343	11.1437	0.0508358	9.30554	3.88488	9.00469	0.0299218	4.33005	0.0423771	14.8248	12.9778	19.5732	14.0937	11.3798	0.049469	5.89117	10.5175	13.8887	4.99951	11.1892	0.0539001	8.75317	7.12142
59.5230797215592_633.31117302596___29	17.0575	16.4465	42.8146	107.318	72.5941	63.3642	55.2027	69.1113	61.935	121.01	50.8136	112.604	77.7173	42.0389	67.0249	63.7715	81.6602	156.655	27.1639	81.801	60.7787	37.0334	59.4809	50.722	52.1828	35.2672	51.2722	169.143	141.235	192.655	179.332	169.964	101.128	52.8682	30.6995	28.5305
59.5458635156806_726.797903586562___5654	12.7263	0.0751286	6.11085	12.3683	0.0579095	0.0525653	12.2753	4.93783	4.75902	12.776	12.7036	10.5142	0.0419457	6.02376	22.3191	0.0508358	14.0293	7.93412	4.53299	6.63676	13.0352	9.42857	5.03314	8.67168	26.3923	7.0357	17.1017	5.39366	0.0539793	26.3546	4.62406	15.0445	16.7885	29.4063	17.4824	35.5997
59.586719427161_1107.46617315384___84	21.1634	167.518	164.394	16.4491	171.461	94.5486	159.071	68.8619	89.6693	140.351	50.9547	153.563	54.9044	96.2446	103.458	61.5758	51.4436	46.6251	63.5017	35.8879	56.8096	41.8915	59.7306	52.2057	77.6979	77.2305	16.9583	59.0486	70.3997	58.5101	36.8203	45.2397	67.5355	29.3237	56.6784	93.0078
59.684252093_423.466844495429___81	223.991	115.416	216.068	28.9397	50.6433	51.7598	12.2861	29.6502	28.5087	25.5773	6.36622	31.5688	23.2136	30.3937	16.9249	33.7264	33.0414	11.8168	4.56931	16.5704	8.78172	28.1107	15.0312	4.38441	39.6477	28.5169	57.7226	21.8591	23.8663	21.3179	0.0425389	40.5813	17.0305	5.94254	13.2973	43.2308
59.73610077432_726.804284390464___5655	12.7263	16.4307	0.0558956	4.12278	6.34138	5.75507	6.13763	4.93783	4.75902	6.38802	6.35178	15.7713	0.0419457	18.0713	22.3191	5.58701	14.0293	15.8682	0.0413265	9.95514	13.0352	4.71429	5.03314	8.67168	26.3923	21.1071	28.5029	10.7873	23.5784	5.27092	9.24813	15.0445	16.7885	5.88127	13.1118	7.11993
59.7772486633224_1112.29992365408___19	17.0016	107.934	206.773	37.162	89.2244	46.2242	79.8452	88.9214	145.197	83.3027	38.353	52.3812	40.8586	210.141	246.628	208.795	89.8781	139.775	179.32	19.4325	138.797	142.834	151.334	107.763	58.4771	42.2541	68.0845	43.0821	70.6205	31.6776	18.4634	49.8565	39.0763	35.3207	39.3995	49.6997
59.8649585855092_423.99568053247__[M+Na]+ 36.8721_81	188.911	212.2	204.002	28.9397	25.3216	28.7555	61.3613	39.4841	33.2601	19.183	19.0986	26.3073	27.8563	24.315	45.133	22.4843	42.4818	23.6335	18.2772	3.31409	21.9543	14.0554	25.0521	17.5376	26.4318	71.2923	17.3168	5.46476	23.8663	10.6589	4.69297	15.218	22.7073	5.94254	26.5946	7.20513
59.9662253534323_1112.86280891244___19	21.2799	99.769	194.051	8.26919	70.1971	69.4443	36.9016	79.1468	208.338	96.2731	19.2025	68.1878	36.3553	127.848	223.843	138.827	116.553	131.736	169.298	9.72963	93.0178	50.8835	93.6555	103.592	58.5559	49.3611	28.4135	32.3539	35.3663	26.4266	37.0317	29.9545	27.9487	47.1567	17.5109	63.9705
59.9916983894552_1072.46615250514___55	1105.54	949.13	602.586	620.233	499.294	630.167	550.391	285.836	389.79	494.334	301.295	356.475	1613.94	566.035	822.691	427.394	193.544	595.333	174.912	468.443	338.238	263.378	170.838	155.173	848.273	1397.82	1225.12	434.524	386.046	524.681	330.131	311.212	383.039	643.124	344.647	567.009
60.0640970280664_421.155939956494___6232	189.672	191.586	146.078	66.8303	51.1817	52.3033	18.648	55.6167	52.8201	25.839	6.43994	10.6335	41.117	17.9541	55.5227	66.3914	27.8737	27.1399	62.9791	42.3983	43.1947	32.2807	78.9285	25.8879	91.0305	63.1388	73.8408	64.3472	58.7117	78.6869	60.0471	74.8755	50.296	52.636	26.2166	42.5608
60.1566301102482_1112.56440111335__[M+2K]2+ 42.3902_19	21.5574	74.8268	192.894	12.5655	63.8155	52.0832	43.0518	59.3601	96.1584	57.7639	32.0041	31.8738	31.7618	386.816	292.86	355.49	151.257	294.023	236.418	29.147	234.718	197.467	256.062	273.382	58.4773	35.2108	124.858	59.2374	105.958	47.5678	18.4907	99.7157	83.7508	52.9792	21.9199	206.787
60.1779553617167_1072.2323879705__[M+H]+ 59.1724_55	931.102	632.56	584.561	705.214	555.384	532.689	357.6	344.447	383.45	397.956	473.487	440.202	1369.07	1243.63	1031.54	377.63	388.36	430.979	476.075	396.068	374.446	262.603	288.8	392.776	1208.62	1595.39	1281.91	421.988	422.795	527.753	288.317	314.452	197.967	497.715	561.274	515.434
60.3468713228307_1112.37771177371___887	12.7679	91.3286	110.343	0.0378092	57.3586	57.7802	61.4194	69.1611	28.4769	38.4474	44.7452	20.9809	31.7789	368.403	315.635	453.303	99.6219	251.657	185.337	42.1037	172.639	231.672	237.873	228.356	123.618	42.3095	220.884	53.9232	106.099	116.529	50.9185	124.641	139.558	58.8678	35.0218	270.004
60.372200301672_1072.04681652406___55	838.743	497.983	552.36	391.618	387.559	463.235	343.457	283.747	275.492	444.868	278.459	245.77	1159.81	463.649	627.34	402.819	353.903	309.445	336.127	277.856	264.898	297.933	169.513	389.658	480.878	906.673	620.496	237.071	298.582	355.139	243.445	254.228	208.299	506.263	251.418	252.862
60.5634436365878_1071.39504002135__[M+Na+K]2+ 59.1724 [M+H+K]2+ 81.1576_55	325.532	350.254	225.052	203.37	226.615	243.343	162.136	165.291	115.417	248.577	183.166	116.921	690.345	461.274	407.986	141.728	205.613	172.91	217.81	127.603	258.855	239.987	88.502	183.558	329.097	429.113	422.404	316.986	182.598	249.19	143.467	155.804	156.016	223.448	199.345	176.083
60.5445848605256_1112.56440111335__[2M+H]+ 29.7699 [M+H]+ 59.5385_19	25.5359	33.2563	104.348	20.673	63.8155	63.6573	30.7513	54.4134	42.7154	64.1821	51.2066	47.2069	63.6217	372.966	170.582	439.541	180.124	190.848	155.435	19.4593	207.082	253.016	250.149	154.625	194.924	70.4216	181.913	80.8848	82.4118	102.827	27.736	99.8483	111.795	47.1567	52.6079	85.2941
60.6304239616074_414.029883885424___38	55.366	57.7768	49.0437	16.5538	44.3274	63.2343	55.326	54.3452	57.1182	70.3288	12.7265	26.3041	23.2474	182.048	179.783	173.404	182.755	82.9182	91.2601	43.1623	100.732	37.5162	90.3833	36.5742	106.271	128.376	69.2352	117.209	165.858	79.9266	42.2437	30.4241	102.199	125.444	35.4762	50.4728
60.7329238082532_414.235007375287___1741	38.3303	16.5305	61.3047	37.2461	12.6799	46.0653	6.14734	14.8214	14.3021	32.0069	31.8548	31.6043	235.937	92.5233	95.594	347.535	140.071	371.671	52.0472	152.369	134.86	106.064	115.127	92.4564	189.432	163.778	201.143	322.402	129.629	253.176	170.66	175.882	173.969	156.654	152.519	125.616
60.7336354392206_1112.85901400193___19	12.9344	83.1409	55.1713	8.37701	38.2893	11.574	49.2021	29.68	14.4238	44.9275	19.2025	53.123	31.7334	218.472	143.852	271.221	146.255	77.0901	118.665	42.0483	193.595	196.592	162.084	94.3502	97.4622	63.3794	98.9658	43.0818	41.2059	63.3399	18.4907	90.1968	67.0007	41.206	35.0218	106.478
60.7553246666953_978.415033297838__[3M+2K]2+ 14.5368 [M+Na]+ 37.7661_80	38.1623	126.138	176.74	45.2198	204.553	124.855	280.73	246.288	182.924	363.101	265.552	440.596	55.6212	30.306	67.3217	83.8485	60.8483	66.9174	54.5146	16.4966	47.774	69.7816	44.2794	52.2158	282.914	227.811	115.185	197.578	216.317	141.082	51.704	203.038	180.274	160.803	66.866	122.031
60.7530154103714_1070.68966684307___55	144.158	329.577	206.142	133.42	108.401	156.117	119.211	109.469	134.379	169.545	144.903	104.466	364.402	255.454	272.508	121.663	101.66	122.595	76.0968	36.8163	69.0697	116.217	93.2907	162.543	343.36	290.859	239.321	117.656	164.334	200.293	87.7252	119.673	183.876	240.911	82.9561	231.151
60.7456876239342_955.181972802885___4254	21.1824	89.789	48.6274	20.5672	81.6066	57.1371	60.8222	49.045	89.843	70.084	56.7588	67.8805	74.4402	158.285	224.964	248.587	204.755	47.6039	171.606	13.2778	126.529	70.157	60.314	153.542	144.821	113.555	97.8734	54.4519	35.5184	107.7	18.7909	65.7219	28.2727	41.5946	31.1711	93.1788
60.8229348376085_414.164500898198___1742	29.7767	16.4862	67.3508	41.3343	31.6624	45.9886	36.8484	49.3453	57.0216	38.3612	25.4838	52.6082	88.185	217.709	224.266	279.858	256.06	170.258	167.484	120.706	209.701	182.866	167.374	126.431	129.106	149.211	168.196	238.438	317.055	227.084	133.434	160.323	124.868	179.52	81.1729	145.797
60.9444789459666_977.428265701347__[M+H]+ 59.9367 [M+Na+K]2+ 59.9367 [M+2Na+2K-H]3+ 59.9367_80	46.642	122.549	176.513	24.6391	151.416	142.782	219.348	239.482	146.877	408.814	236.827	353.842	78.7907	60.5363	84.0276	78.2703	42.0578	39.3127	49.8656	23.1012	47.7021	46.4407	69.7544	78.2058	125.155	233.038	113.08	169.053	118.424	111.546	51.7283	125.176	153.185	136.987	71.3342	122.073
61.0019778301168_125.86739312538___5723	8.47104	8.20199	24.2959	0.0378092	18.8957	0.0525653	0.0559893	9.80859	0.0434681	0.0583543	12.66	0.0480593	31.8799	0.0549343	0.0509082	291.457	770.916	415.906	0.0413265	351.11	0.0396735	0.0423771	0.0454262	8.6147	329.71	0.0645454	5.66399	16.1112	23.4753	10.488	13.8839	29.9713	343.337	309.884	235.311	21.239
61.0100067961007_1138.33268540534___7941	84.8974	109.283	124.132	61.7596	90.3627	93.711	135.325	78.9026	47.3028	108.814	103.397	99.3642	226.227	163.035	154.918	101.191	97.1495	176.929	99.9802	127.69	109.703	140.378	139.387	120.531	105.186	189.68	137.747	114.458	95.4096	136.677	79.438	135.37	107.367	95.2241	187.815	194.147
60.9892227535739_1187.05092499075___187	0.0389307	41.0754	0.0558956	0.0378092	75.8384	17.2011	0.0559893	0.0451426	0.0434681	0.0583543	107.568	0.0480593	122.729	119.587	118.312	77.5071	97.1858	26.4994	58.3265	139.977	77.7388	69.1091	123.642	56.7304	272.909	204.36	307.663	145.293	192.922	215.681	269.643	267.67	139.45	401.649	367.414	142.062
61.0324138354187_633.58380829287___29	17.0336	16.4696	12.2494	49.6233	38.032	34.5532	24.5667	39.4828	55.0971	38.3127	31.8088	47.3713	36.6631	60.1468	33.5104	44.5443	32.7331	54.8131	40.6819	32.7742	39.021	23.1758	49.6304	34.6623	78.3209	56.3529	62.6635	187.667	215.185	157.631	202.12	130.843	106.629	74.6427	43.9257	71.2316
61.1244793821008_1108.43594047075__[3M+2Na]2+ 25.4251_19	97.1187	108.047	61.3658	180.521	63.816	93.0979	98.4445	63.8477	52.2123	83.4111	76.8149	47.212	504.628	344.301	353.525	195.269	143.083	175.526	67.5081	103.827	121.328	150.264	129.064	145.164	97.5851	143.583	155.568	86.2966	75.0218	95.1525	60.1487	69.9331	72.6925	47.16	52.5098	120.89
61.1359298286217_978.634840526374__[M+H]+ 60.1315_80	25.4203	284.216	91.0833	36.952	218.756	114.241	125.203	131.991	137.079	273.142	165.622	216.711	64.8914	78.7955	84.1521	61.3877	37.4451	86.599	36.3431	13.1972	56.3616	51.091	49.1993	30.4592	221.486	274.763	103.667	169.002	251.413	315.442	61.1047	198.677	296.234	89.2119	48.9762	172.983
61.2098104019448_414.208380614569___38	97.9552	49.5211	117.413	99.3229	76.0792	52.5402	43.0314	98.8094	61.8618	32.0069	38.2257	47.4064	650.046	526.221	757.502	587.713	582.545	539.23	363.62	395.494	338.137	277.738	342.595	305.9	344.18	357.208	314.737	535.672	509.967	344.456	339.211	308.503	295.912	350.671	272.967	183.462
61.3231275845258_1107.78260950931___84	114.828	90.8255	110.458	70.9526	51.0504	109.866	43.0689	52.7242	61.7063	83.4106	44.8117	36.721	502.652	229.294	371.385	131.728	158.452	182.044	53.9331	40.6128	73.632	157.014	153.883	131.168	91.076	123.269	147.938	120.714	111.989	143.605	64.7681	59.9441	27.9594	106.136	96.2534	63.9998
61.3281005563263_979.305512644957___1	33.9319	73.728	125.172	53.4315	75.4866	125.806	102.847	85.3681	39.6706	132.035	187.348	110.276	73.2339	47.8812	44.959	77.1988	42.2006	62.1825	58.3168	33.0507	38.5459	55.0705	63.9592	74.1048	261.886	177.954	91.837	136.458	235.059	181.653	37.6488	169.047	79.0307	113.302	53.4892	296.391
61.4035094671814_414.241490377046__[2M+3H]3+ 90.5888 [M+3H]3+ 181.187_38	110.17	99.0421	61.3048	45.4678	31.6997	17.2745	24.5656	29.6072	66.6204	19.2041	25.4838	42.139	529.815	625.004	422.153	505.289	371.391	459.764	339.549	195.26	257.663	171.567	324.723	169.538	245.254	177.942	241.842	350.244	378.006	330.869	227.85	386.404	238.187	321.253	201.643	130.81
61.5067242463691_1072.88982161851___55	76.5395	549.038	856.687	61.9519	353.399	140.007	134.887	69.3089	294.926	224.243	318.965	47.1681	555.029	302.956	830.016	99.9047	191.622	222.027	322.865	29.1036	89.7744	154.288	104.81	268.914	380.383	634.205	294.713	159.982	123.818	150.233	230.798	239.477	202.695	155.277	56.9391	297.453
61.5243346874316_981.392345519371___1	55.0788	171.762	133.569	49.9474	120.472	93.7051	73.3728	110.108	75.6764	165.287	89.4835	130.545	63.8437	53.7255	44.2007	49.4879	59.9503	46.4958	8.95045	22.7309	29.937	54.9652	54.0311	38.5796	277.178	294.875	155.091	183.387	147.85	255.615	42.1887	193.063	84.5254	65.3848	62.2627	143.348
61.5227450188762_1108.58977939355__[2M+2Na+K]3+ 49.8027_19	58.3191	125.561	74.0195	66.484	25.7166	87.3953	30.9669	59.6774	57.2397	38.7662	64.4708	21.0911	218.494	161.868	213.775	78.1745	41.9811	104.76	36.1841	39.038	39.2315	92.9922	84.3728	78.0846	111.145	161.724	85.6367	43.3602	41.4627	106.49	60.4628	45.1778	16.8535	105.023	66.077	57.1708
61.5946531989915_414.229441390502___38	102.092	57.7018	51.7693	57.8681	25.3299	80.48	24.5656	39.4762	47.518	25.6055	31.8169	31.6043	268.553	250.878	350.502	295.841	169.41	212.716	182.46	133.159	258.837	111.662	147.495	187.151	247.74	220.399	155.166	289.959	249.723	259.232	98.9491	136.059	101.014	193.03	140.029	151.53
61.7038041439392_1073.18552563046__[M+Na]+ 38.714_55	34.0176	777.316	578.97	87.5554	340.578	197.461	122.936	88.9493	278.059	212.446	353.939	78.6135	501.609	339.693	809.611	88.8042	188.082	195.779	247.984	29.0639	155.015	112.599	174.823	271.356	248.627	591.682	270.255	140.231	135.611	139.199	241.955	264.986	175.512	264.632	52.5592	237.497
61.7119671026075_632.660015090052___1296	12.7756	24.6697	0.0558956	82.0333	118.041	192.291	189.617	213.329	206.532	127.481	87.2245	69.481	32.0397	24.0222	27.927	38.9766	23.3487	85.2075	22.6071	16.3639	26.0138	18.5167	19.827	34.6149	19.5493	7.04223	28.4845	108.343	105.302	177.415	93.7714	65.0046	93.5831	23.5176	21.9282	21.369
61.7832775876144_413.054587104783___38	206.559	272.952	197.821	160.662	78.4284	112.486	148.683	99.8836	156.782	95.902	38.1282	126.259	129.25	167.465	144.735	123.433	134.932	79.6007	54.7503	72.6767	83.1993	70.0898	45.0265	37.6057	72.5915	102.691	57.2674	152.034	113.288	110.353	37.4869	65.8087	56.6778	49.8629	69.8766	28.7866
61.895012855915_1072.78384031653__[3M+H+Na]2+ 33.2669_55	29.8047	469.974	449.136	57.8982	196.128	177.246	135.414	59.5243	203.375	153.893	306.122	62.9734	374.551	256.871	794.415	88.8042	124.032	153.538	276.158	22.6361	105.229	54.0087	90.4714	197.805	224.26	465.117	179.058	194.206	70.8578	187.773	253.603	86.2853	96.4353	119.444	56.9391	302.01
61.9671324920846_406.166152499483__[M+H]+ 60.9619_66	118.875	287.96	232.44	115.564	183.224	215.396	175.576	83.6906	80.6679	220.428	120.402	52.506	18.274	107.747	66.6174	93.9973	111.469	23.2685	76.4373	29.3388	12.9502	23.0413	78.9185	30.179	169.12	161.421	130.584	26.8739	70.4515	68.1836	36.9505	34.9496	55.8666	46.8079	30.5348	28.3754
62.0319122625171_674.841778366118___20	46.8091	24.6489	48.8586	8.25409	12.6666	5.75372	12.2805	0.0451426	14.2663	0.0583543	6.36487	10.5212	13.7745	6.01905	16.7763	11.1511	14.0451	3.90865	0.0413265	9.84611	4.3401	27.8273	9.93469	8.66645	134.322	231.852	221.079	27.0015	11.8031	36.9594	13.9149	35.0777	5.60598	29.3921	26.3151	14.264
62.0861542533338_1072.73256607933__[M+3H-C3H2O3]3+ 269.235_55	59.6094	314.72	225.023	45.4915	127.961	86.8372	143.751	34.6544	75.9538	109.008	155.702	43.8421	293.301	127.683	388.48	55.4933	97.2961	96.2132	142.383	51.6601	132.056	82.8663	96.2415	159.239	131.654	379.868	153.324	136.977	95.7577	84.5572	117.228	70.9138	135.86	125.161	88.8779	208.877
62.1623005989849_413.626223205802___38	237.334	49.4606	134.701	123.127	101.296	86.2253	79.8181	54.2778	61.804	133.796	95.4485	78.8252	132.582	147.184	88.5639	106.761	80.1075	103.025	82.2892	62.818	61.4059	35.5073	45.1109	39.429	228.832	128.568	124.34	124.683	124.994	129.539	72.3457	104.857	62.4543	125.006	66.5179	50.3879
62.2229217069107_674.921380226729___931	30.1987	8.21629	48.8586	4.12705	6.34197	11.4923	0.0559893	4.93516	4.76186	0.0583543	12.7124	5.26777	0.0419457	6.01905	5.58443	0.0508358	0.042614	7.8173	0.0413265	3.27761	0.0396735	4.63788	4.96734	12.9997	134.598	204.295	209.504	0.049469	5.89359	26.3567	9.27659	10.0248	16.818	5.87843	21.9293	14.2448
62.2629439342562_414.20487324998___38	68.4995	49.5211	61.3048	45.5248	31.6997	57.5817	49.1916	49.4046	47.586	38.4082	31.8169	47.4064	85.3391	112.155	70.8122	132.252	112.952	173.893	72.2308	45.7746	77.045	50.85	62.7956	53.7646	155.672	112.696	77.3435	180.871	144.719	138.343	102.142	126.492	74.8204	64.5118	83.613	28.4843
62.354361405307_414.297706422817___38	93.5839	82.4311	110.21	78.5352	50.6598	74.7314	24.5656	44.4108	42.7662	38.3612	38.1803	57.869	180.421	188.109	158.571	207.079	154.103	63.0447	99.7769	107.891	92.2083	71.9019	94.2476	113.683	158.219	157.925	184.663	143.842	155.702	185.279	55.6292	149.057	121.635	122.311	107.233	71.2108
62.3897245403958_486.213309651823___52	142.918	87.0087	65.4111	58.5811	51.0471	40.7966	12.4463	14.9815	0.0434681	0.0583543	6.45443	5.33655	9.27967	5.99518	5.56663	5.61355	0.042614	15.7552	0.0413265	9.92641	12.9892	4.6801	10.015	0.0395657	19.8112	21.3885	11.5335	0.049469	17.8651	5.33093	23.415	5.07293	11.354	11.8707	13.2927	0.0652299
62.4154920357124_674.856756204989___927	38.2983	32.8652	36.644	4.12705	6.33331	0.0525653	0.0559893	0.0451426	9.5109	6.38157	0.058061	10.5212	4.59149	12.0381	11.1842	11.1356	18.7268	0.0356921	4.52419	0.0299218	17.3604	13.9136	14.902	8.66645	137.08	156.225	291.691	21.6012	5.90155	15.8184	0.0425389	5.0111	11.212	0.0539001	4.38586	14.2445
62.4054602118433_843.529931025067___2524	98.0156	159.668	201.278	16.789	6.41596	5.82181	6.2246	15.0444	4.8406	19.435	0.058061	5.35001	9.28397	12.072	22.4416	11.1719	23.5447	15.779	18.2361	13.3236	13.1417	14.007	15.0642	4.39365	26.4202	28.5724	11.5248	16.444	17.947	32.0236	4.74144	20.3559	22.879	35.896	17.8671	7.22955
62.556033418157_414.262771863252___38	80.9195	16.507	42.9133	33.1076	25.3597	28.7908	30.7367	59.2856	19.0344	19.2041	6.37095	36.8717	82.4461	113.8	96.2404	89.9158	52.0195	75.1037	22.8972	22.9387	61.5317	46.2867	30.1278	48.2801	91.4017	35.2174	140.823	75.5756	82.4914	63.3241	37.0861	70.1095	56.0757	76.3332	52.5653	28.4843
62.5811321318876_486.7108559835___52	104.312	91.7732	136.227	54.1439	12.826	34.9091	0.0559893	4.99385	19.2655	6.46459	0.058061	15.9829	13.8969	12.1177	0.0509082	11.2271	0.042614	11.8164	4.56256	3.3088	12.9749	14.0403	10.015	12.96	0.0597342	7.10698	28.7864	16.3523	5.93662	0.0482588	9.366	10.1286	11.3348	0.0539001	17.7236	0.0652299
62.6050149435716_843.737741978126__[M+2H-NH3]2+ 140.221_51	178.466	166.079	227.241	20.9862	6.41596	23.2872	12.424	10.0296	28.9842	6.47833	12.8766	16.0173	41.7779	36.2159	28.052	0.0508358	9.4179	31.5581	18.2361	9.99273	17.5223	18.676	15.0642	21.9682	19.8151	50.0016	23.0496	21.9253	29.9116	32.0236	14.1974	0.0459168	51.4777	53.844	8.93354	28.9182
62.6092700676794_674.868581306568___20	17.0215	8.22771	36.6928	4.12705	0.0579095	11.5074	6.14025	0.0451426	9.52371	6.38157	12.7297	10.5355	0.0419457	24.1085	16.7763	0.0508358	0.042614	3.91364	0.0413265	9.84611	4.34589	4.64368	4.97363	8.67794	180.485	149.466	145.636	10.8125	0.0539793	21.1196	0.0425389	25.0956	0.0513705	5.88622	4.38586	7.132
62.6725751425815_1003.27251392592___31	38.22	299.396	66.9669	41.2173	76.9017	155.201	270.648	73.8807	56.8252	76.469	81.4153	62.8098	693.468	89.3896	285.876	38.6333	46.1985	85.247	49.305	25.9791	51.6662	315.403	232.704	131.34	492.488	785.85	224.868	160.847	106.04	179.338	100.38	187.519	219.295	444.697	74.7522	212.149
62.6646398422443_988.731482208273___48	33.9152	226.204	91.1136	28.7891	100.708	45.7905	158.231	58.9225	85.182	120.685	82.1718	41.8079	463.369	145.138	705.177	57.982	51.5133	78.9396	144	36.2845	91.178	750.399	333.294	114.207	168.298	406.194	85.9463	76.0895	153.682	79.5209	56.0718	171.513	95.6167	244.344	31.0495	164.525
62.6855475746856_989.724036355852__[M+K]+ 23.7224_48	33.9555	188.536	97.1879	32.9429	44.0762	68.7719	30.4675	54.151	61.5203	127.224	106.503	99.2937	1474.65	42.3279	242.175	49.5944	28.0528	66.6712	49.899	42.8826	98.6716	860.999	443.25	187.654	269.655	206.16	111.385	92.2727	94.513	84.7178	79.3896	161.348	56.239	345.368	90.7822	92.9636
62.7982774107644_843.411880843969___2525	127.36	90.4476	95.6372	4.20559	19.2866	5.83343	24.8481	0.0451426	14.4921	6.39563	6.4383	0.0480593	9.29821	6.04532	22.474	11.1859	18.8625	27.6133	9.13385	26.6834	4.38579	4.66899	5.02828	17.5977	19.5604	42.3161	5.6887	21.6446	23.6223	5.27007	18.9298	20.0909	5.64675	29.9133	40.2779	21.4087
62.8649796474539_1001.014648987___4842	21.1848	384.171	79.0169	49.3413	75.6298	184.554	239.386	34.393	33.1105	88.9102	94.8835	62.6576	1300.98	96.2805	666.399	50.2	46.701	85.8939	30.6462	16.4248	95.5523	1103.3	532.841	185.144	380.414	610.917	176.685	181.922	123.549	151.255	78.8503	228.72	163.945	573.8	52.8058	256.476
62.932856816905_1098.85697993337___56	143.143	157.311	109.956	107.163	146.122	103.727	97.9649	118.151	108.804	121.339	133.733	114.906	437.248	290.774	238.699	306.801	225.786	213.955	287.329	308.527	172.115	200.387	198.229	215.625	181.42	105.428	192.256	198.883	238.909	120.957	239.513	185.47	172.25	278.605	577.769	169.801
62.9424775049695_414.012642119604__[M+2H]2+ 123.878_38	99.5615	57.7746	110.349	41.3862	19.0198	34.549	12.3111	44.4642	28.5516	38.4082	19.1129	57.9412	59.1365	63.7606	56.5156	127.798	113.497	77.9294	54.2444	71.9945	61.5317	50.85	79.3054	35.1128	71.8156	84.5217	74.0771	130.756	43.468	68.4089	83.2241	85.133	139.977	64.5896	52.5653	64.0897
63.0615023562458_1057.32703886097__[M+3H-H20]3+ 204.19_9	42.8654	402.022	92.9363	45.8308	115.824	70.1248	68.3219	114.701	90.889	122.804	221.63	79.3122	251.751	88.7838	186.65	119.219	55.2655	141.636	172.169	54.7902	55.9547	262.107	245.251	184.958	252.89	511.518	129.993	152.183	112.801	163.03	145.099	169.83	66.6078	291.469	96.9882	228.225
63.0596785043358_988.489595685222___2356	63.6576	293.656	115.363	69.988	107.127	108.857	85.3022	93.4078	71.061	133.521	75.9197	115.091	958.602	167.737	400.86	67.015	65.4507	98.2143	104.351	9.89576	113.075	628.726	355.872	134.711	269.257	241.684	131.965	108.599	112.4	111.219	105.869	136.39	144.419	297.327	62.1997	143.255
63.1312009152979_414.317454294467__[M+Na]+ 40.1463_38	194.613	41.2675	85.8267	49.6635	44.3795	51.8235	18.4469	74.0179	28.5516	51.211	19.1129	42.139	209.6	224.901	218.36	149.039	169.81	202.755	109.791	119.106	180.031	125.46	146.626	142.593	200.162	202.99	226.172	214.585	196.995	220.753	181.275	183.166	159.783	207.978	113.117	150.357
63.2530942653963_1056.09020205065___9	50.7877	492.122	116.067	86.502	76.2351	126.764	160.694	83.7281	118.102	114.913	163.289	73.1045	284.339	88.7785	207.868	55.0838	87.4196	149.142	93.6529	38.6514	66.9326	334.558	338.018	280.578	161.729	670.791	174.212	163.831	133.803	136.704	115.398	159.42	105.339	193.72	69.5794	293.452
63.3227940147668_414.335693190699___38	159.915	57.7018	91.8419	49.6012	44.3274	34.4914	24.5656	34.5417	61.7734	19.1806	57.3386	36.8257	197.866	188.935	186.48	188.053	136.86	167.601	95.8756	79.1615	105.284	111.631	85.362	85.2437	159.261	163.982	165.246	139.556	180.229	170.442	144.897	141.556	86.9169	144.977	93.6612	128.369
63.4535630445639_1065.41188019714___5464	120.758	287.508	109.857	61.6579	82.5165	155.436	110.009	83.5898	103.759	127.386	223.43	73.007	511.725	29.9646	105.517	94.8116	51.2482	138.71	67.7216	71.6453	65.5972	436.315	548.166	201.899	326.995	517.875	233.586	139.419	94.1007	189.248	110.321	174.629	158.403	192.601	113.095	143.056
63.5169063975102_414.120665357474__[M+Na+2K]3+ 89.6357_38	68.058	82.5384	73.4735	70.2684	37.9949	68.9828	61.3986	59.2121	85.5324	63.9353	25.4529	52.6082	27.8479	121.568	73.3314	87.1102	75.5243	116.991	107.166	88.4079	78.8337	38.9564	79.2761	43.81	112.378	71.3199	132.851	92.9033	77.5429	79.9266	104.417	136.98	68.1325	65.4022	52.0791	68.5189
63.6066819784545_1102.53926656997__[M+2H-C6H10O4]2+ 271.255_84	17.2504	158.488	99.6505	16.7635	71.0972	76.206	118.418	65.1349	94.4306	103.992	32.4256	132.974	36.2894	89.2612	93.4381	83.1134	27.7642	46.2529	44.9847	22.6294	51.8858	64.6863	44.303	25.8441	45.4663	91.592	39.7059	37.7048	47.1134	26.3975	36.9354	29.9349	72.6402	52.9896	31.0111	70.9984
63.6406217435379_1055.24120430141___3	92.818	234.408	176.553	86.1307	164.613	183.766	152.56	142.369	215.177	229.058	152.379	145.773	336.467	167.163	204.913	232.922	147.818	181.303	151.998	84.4817	160.657	426.997	428.683	625.011	237.457	417.397	130.921	190.712	195.052	217.106	185.062	180.134	134.167	248.727	175.397	256.254
63.8035747306025_1102.98279561452___84	17.2504	124.484	105.707	29.3361	96.9507	70.344	112.186	60.1245	81.7659	77.9943	38.9108	58.4896	45.4185	79.7683	49.7569	33.2454	37.5683	46.2529	53.8343	19.4215	64.9364	32.3431	53.5082	47.3809	90.9326	35.2277	34.0336	80.796	70.67	95.031	46.1692	69.8481	27.9386	52.9896	62.1406	78.0982
63.8341823181509_1043.81462598736___5	50.7958	140.606	79.3186	37.0423	69.8647	120.889	110.106	49.2372	117.959	89.3225	101.902	99.2092	157.793	119.8	105.593	89.3535	60.6186	131.759	99.5789	42.9241	109.16	330.859	461.622	473.461	148.507	230.89	78.8363	149.889	110.948	164.686	87.0083	118.837	93.8403	225.848	56.4148	140.87
63.8852049179574_450.301011513674___6729	25.567	8.26798	55.1332	64.5531	146.57	116.615	67.6609	79.5964	90.5178	19.2374	38.3072	21.1088	9.1933	0.0549343	5.58364	11.1048	9.33775	15.558	13.5474	13.1155	39.0901	13.894	14.8518	4.33763	6.5321	7.05095	11.4148	5.40985	5.90214	10.543	9.28606	10.0272	11.2135	11.75	17.5255	21.3717
64.0355684491922_1049.93188334664___3	55.6522	142.324	105.232	33.3117	115.624	104.878	80.4964	84.7143	95.5566	168.884	83.7566	100.376	164.142	116.253	111.056	78.0764	79.1265	96.7892	58.6988	91.3919	100.272	370.79	336.773	142.856	206.347	388.814	96.9059	177.614	109.587	254.592	115.885	110.655	134.647	173.62	79.16	142.768
64.0744982418217_450.521393711996___6683	51.1339	33.0264	24.5036	20.6966	175.124	97.2776	80.071	24.7221	38.063	25.6037	12.7489	10.5377	9.18074	6.00277	11.1518	16.6374	13.9873	3.88503	9.01846	13.0964	4.33752	0.0423771	4.94477	4.33151	13.047	14.0835	11.3991	16.2069	11.7885	10.5284	13.9103	0.0459168	5.59947	5.87524	17.5037	7.11455
64.21488161857_1072.03301248698___55	440.098	377.012	455.797	128.366	280.541	312.984	243.812	214.258	168.701	126.335	219.578	179.237	150.033	537.661	333.992	190.762	304.67	264.635	194.266	216.07	183.087	116.849	103.274	141.521	477.944	639.244	421.677	223.228	294.638	389.229	182.475	194.606	242.077	408.138	265.742	347.668
64.1963893547234_1110.27284054794___889	17.0293	16.6487	122.732	28.9509	31.9633	40.5661	49.2843	34.628	66.4493	38.4984	25.6437	52.4528	49.9387	125.323	133.409	88.8694	97.4568	65.6172	182.598	32.3831	94.7328	140.922	134.241	121.943	78.0758	63.4815	62.4901	53.9228	53.0369	47.6479	23.1333	39.9393	61.4895	41.2664	30.6801	78.2025
64.2752787990918_450.301011513674___6730	59.738	41.3396	73.6279	20.7244	59.455	81.8702	43.1152	29.7066	28.5473	25.6037	6.37445	15.8065	18.3615	6.00277	39.0313	11.1075	13.9873	11.6695	22.5789	3.27409	8.67505	4.63744	0.0454262	0.0395657	13.047	49.2921	11.3991	0.049469	5.89425	5.26421	13.9103	15.0208	0.0513705	5.87524	8.76236	14.2291
64.3891112723367_1110.08053874427__[M+K]+ 25.4251 [M+Na]+ 41.3971_19	46.7666	116.365	122.732	37.1727	102.133	28.9344	43.0609	79.168	90.0603	64.9697	38.4068	68.4218	39.9931	327.78	264.41	291.672	185.161	209.716	173.438	25.9421	208.996	192.944	111.704	227.742	144.782	119.782	161.228	79.7549	117.704	116.301	46.2057	119.21	93.9704	47.1609	39.4459	207.074
64.4093527252013_1072.74625789449___55	536.062	616.088	291.347	287.987	313.005	366.977	263.142	172.937	234.326	194.597	222.482	156.206	482.105	647.782	336.503	225.544	223.373	277.504	222.032	237.479	98.5806	105.885	203.111	142.309	551.531	655.608	468.955	274.517	201.184	296.131	317.735	190.274	253.616	339.212	366.706	309.999
64.4676228836605_450.532494895938___147	38.3038	41.231	30.5924	37.2084	25.3482	22.9823	18.4303	19.7532	52.2722	6.39295	6.36677	21.05	18.3393	17.9867	22.2745	22.1539	0.042614	11.6428	4.50425	3.26983	17.3288	4.62463	9.87886	4.32611	26.0626	14.0661	11.3851	5.39565	11.7741	5.25777	0.0425389	35.0057	5.59148	11.7223	4.3711	14.212
64.5860364074811_1110.26801434249__[3M+2H]2+ 42.3902_19	29.847	66.5948	79.7761	16.5679	63.9266	28.9758	30.8027	54.5115	42.7812	12.8516	38.4656	36.717	40.9226	276.109	216.629	398.207	144.344	104.372	138.451	6.48553	168.453	170.38	191.867	276.553	110.607	84.642	176.103	37.8109	111.967	132.355	18.5067	50.0108	89.5757	53.136	65.7431	245.398
64.6128880900932_1072.77033790766__[M+2H-C6H10O4]2+ 273.279_55	412.733	202.503	279.798	203.112	113.511	202.544	260.718	125.373	134.385	117.853	70.3335	125.782	240.879	543.426	285.835	124.769	181.326	154.421	104.616	146.729	105.009	102.142	59.0139	116.027	336.76	422.243	283.332	234.716	210.153	258.543	235.268	153.493	135.86	314.784	183.754	179.17
64.7848432020658_1110.38325362861___890	38.2636	66.4184	67.4135	8.27169	38.2397	40.4551	36.861	44.4601	52.1402	96.1166	38.3542	47.2075	27.2393	237.289	191.018	315.958	130.376	174.265	130.226	35.6215	166.487	178.235	203.398	242.565	130.736	63.4815	124.815	59.2367	64.8229	84.4703	36.9646	69.8022	44.6587	35.3227	54.9637	78.0986
64.9829897197881_1111.25220389724__[3M+2Na]2+ 27.9937_19	38.3159	66.4184	67.4135	12.4075	25.4932	40.4551	61.435	54.3402	33.2246	96.1166	38.3542	57.6209	36.319	180.419	133.936	292.225	138.429	127.154	134.995	19.4299	125.72	221.972	170.091	159.189	77.9715	105.638	85.1012	48.4664	47.0819	68.6321	18.4819	39.887	39.0764	47.0969	56.9004	127.798
65.1776510522536_1111.42181246169___891	17.0027	66.42	55.1707	33.0336	25.4935	69.3512	49.147	4.94016	28.4396	32.0392	25.57	26.1913	31.7786	210.528	94.0987	221.728	79.6472	57.3876	71.8785	19.4301	155.554	167.2	218.325	125.847	45.4834	84.5103	39.7157	107.697	47.0819	42.2359	36.9638	49.8577	27.9121	29.4347	43.769	70.9991
65.3832212962096_1111.99595584735__[M+Na]+ 42.3902_19	25.5024	133.023	61.3831	8.25823	44.6726	17.3611	36.9092	64.3082	42.6583	57.7479	70.4128	36.6668	22.7288	89.399	121.776	180.438	41.7648	50.1099	94.4699	19.4594	93.8106	113.693	110.345	112.321	64.9745	105.635	39.7159	54.2566	41.1953	58.1554	41.5939	29.9139	61.4881	29.474	39.4515	71.0936
65.395688457252_978.07062614163___80	38.1623	254.234	115.492	41.0578	125.667	194.96	437.233	220.742	189.797	164.702	163.814	348.216	102.94	72.7343	206.517	39.1293	70.2096	68.857	109.029	16.4966	78.0392	83.6035	73.799	117.486	269.741	375.883	146.819	169.731	206.903	127.473	28.2022	309.228	141.11	279.073	26.7464	157.922
65.4308363537351_500.641331964555___751	17.1696	49.887	12.3399	16.6769	0.0579095	17.3996	0.0559893	4.98072	0.0434681	6.4516	0.058061	5.30885	0.0419457	6.06149	11.2303	5.60016	4.69943	3.92383	9.10199	9.89358	17.4997	13.995	9.98198	17.476	108.843	170.547	109.24	32.7062	0.0539793	15.9397	23.3331	25.2806	5.65785	5.91925	13.2525	7.18441
65.5959683860789_978.469367139659___80	33.8937	245.296	143.273	49.2693	151.178	217.388	372.528	223.262	70.9144	101.355	233.346	369.557	247.432	96.9791	155.944	67.0788	46.8064	51.1721	77.2291	19.7959	65.0327	65.025	34.4395	104.432	220.687	234.834	97.9074	218.953	205.469	257.57	56.4044	312.598	131.61	268.514	44.5773	143.615
65.7864850670604_956.152941056649___4218	29.6583	97.8446	42.5012	28.7954	56.501	85.7057	103.404	83.3855	42.5496	31.6717	100.908	78.3332	51.1666	103.427	398.156	348.841	94.0493	51.5696	59.4482	13.2704	213.174	87.1236	90.4512	111.061	85.5917	92.276	63.3363	32.6751	130.24	90.2578	18.7915	45.5031	39.5348	77.277	40.0886	50.1759
65.7936788609221_978.620430507837___80	29.657	448.878	286.019	53.3751	338.661	342.68	837.837	542.414	113.463	430.29	425.334	829.142	101.972	118.035	163.596	83.8485	88.9322	66.9174	100.671	9.89794	69.3682	179.955	93.4788	110.181	341.729	542.615	305.188	368.2	447.312	286.952	47.0036	463.612	493.779	452.521	53.4928	136.387
65.8639181335462_420.072485141974___6259	76.6641	71.5646	85.85	62.0921	44.368	23.0326	30.7953	24.7136	52.3401	32.0089	25.4806	31.6043	41.2695	42.0338	50.1461	11.1017	13.9859	27.2342	13.5435	6.54601	34.6894	18.5059	9.89831	12.9891	112.247	70.4186	143.702	16.1979	47.1412	52.6453	37.0854	35.054	16.8192	23.4757	35.035	35.588
65.9865608438562_979.272672843624__[M+2K]2+ 54.0493_1	25.4489	246.428	115.372	32.8809	308.855	190.957	524.72	575.586	121.932	560.039	452.211	559.999	63.9997	206.251	67.3217	98.3778	107.473	70.8537	166.574	9.89758	64.2432	86.494	49.1993	278.051	301.115	397.067	272.29	198.926	486.861	283.495	61.1047	311.847	367.218	394.318	75.7764	186.635
65.987912761317_956.397730257404___4255	16.9327	73.3098	66.7162	16.4328	62.7129	62.768	97.2136	83.2036	51.8949	69.5995	62.9982	128.858	69.649	115.395	235.737	379.334	79.7956	82.9953	104.587	16.557	197.084	88.6778	110.333	113.202	111.81	113.456	57.517	92.4592	100.529	148.491	46.9299	55.4968	73.3423	89.0741	48.9459	85.8412
66.0551487998382_421.117917141069___6238	68.7546	58.4019	49.5729	37.6497	12.8149	46.5547	49.7267	24.938	19.2368	45.2989	25.7712	21.3039	13.9016	23.9623	16.6753	38.7762	23.2535	34.9284	18.0122	9.92492	25.9559	18.6806	14.8138	17.2777	59.3578	85.4058	17.2876	32.7348	29.783	37.2445	28.1109	15.1889	22.6686	35.5905	26.5577	7.19328
66.1867654306622_978.981288641132___3895	33.9319	253.715	176.277	32.8809	312.147	160.284	424.994	310.679	70.9943	421.093	266.013	397.966	77.714	95.641	157.057	60.6562	70.2049	58.2207	124.344	32.9919	96.1179	73.4273	68.8085	179.627	292.62	435.297	330.751	158.787	553.36	158.045	84.5731	213.9	384.368	293.19	58.0181	259.262
66.1855965821662_954.95248310984___4219	4.24145	48.9714	24.3184	20.5924	25.1097	28.6023	85.252	49.0298	18.9132	44.4004	44.1986	47.0018	37.2917	79.125	94.5417	196.154	55.6788	47.511	31.9557	9.83799	212.891	56.2458	90.471	43.0996	65.9034	106.458	86.4565	81.7732	41.497	85.04	28.2188	50.6119	28.2727	65.4368	13.359	64.5939
66.1842882599528_1112.29992365408___19	21.5186	41.4612	42.911	8.36183	44.6122	17.3341	24.5678	35.0139	33.5941	38.4474	44.7452	42.4208	54.4001	77.3703	260.359	77.5503	32.398	69.887	44.8697	16.1724	64.8909	83.0789	83.6762	94.7135	51.9159	84.4048	90.6732	53.7878	23.5119	10.5463	60.0061	54.7757	61.3423	58.7945	39.345	56.7312
66.3841869230054_979.772515681349___1	63.628	196.395	99.3537	57.5471	183.735	106.18	173.179	178.546	104.133	361.394	140.931	250.935	50.2855	89.6634	61.701	16.5426	60.8443	69.3464	71.6885	9.7745	68.4621	78.0263	68.8709	87.0259	195.509	178.856	171.827	141.884	312.778	173.111	66.3799	148.908	315.194	168.724	67.1316	155.402
66.6546652944031_424.609105427796___81	94.2815	16.5924	92.5455	95.8538	50.9647	63.6493	49.5139	64.6599	62.1785	38.6133	44.8449	52.9479	32.2651	30.183	28.0025	33.4817	9.3709	43.027	27.2224	26.3175	43.583	23.284	24.8684	17.4089	45.9206	42.4707	45.8451	27.1305	5.92164	10.5805	27.955	25.1745	33.806	53.0973	39.6151	78.6787
66.9786813904072_1042.95840352577___5	105.74	140.603	134.356	24.6809	121.023	103.522	91.6748	93.4786	84.9541	121.128	101.783	93.9392	96.0416	108.012	155.855	139.471	97.8148	104.538	103.988	39.1982	61.141	243.294	252.158	473.753	164.003	322.152	148.325	148.228	135.866	224.903	148.486	195.654	140.257	171.647	131.773	337.891
67.0321966640225_1089.87765903712___33	608.388	823.244	744.257	540.298	734.057	575.552	615.692	503.988	626.643	761.409	708.823	755.152	68.0926	17.8859	44.2619	16.6396	13.8804	30.8208	31.3939	12.928	25.9761	27.683	40.2107	77.5519	97.3778	63.3282	160.163	118.478	76.5228	51.4441	129.327	123.809	145.264	111.691	131.289	134.899
67.0565901319153_926.950926560059_[1][M]+_[M+Na]+ 44.0715 [M+H-C2H4]+ 94.08_7	6760.9	8153.79	5739.01	4871.43	5854.66	5178.52	4990.74	5576.44	4904.82	6465.21	5559.41	5427.11	4753.74	4836.06	4168.59	3557.68	3453.7	3229.07	3410.83	2951.97	4865.02	4476.03	4554.83	4259.48	8270.29	9003.7	7595.28	6838.43	6123.51	5519.55	5893.32	6556.18	5090.82	9847.2	6952.04	7950.01
67.0565901786917_982.900471720327___1	6071.25	7724.11	6109.69	5411.49	5769.04	5119.93	4954.93	5249.47	4955.79	6405.61	5498.67	6009	4262.2	3553.27	3419.6	4374.51	3430.55	3511.35	3652.19	3229.54	4225.33	4017.53	4410.86	3933.03	5457.93	6045.02	5210.07	4859.14	4978.34	4078.51	4901.43	4273.21	4221.27	6419.86	5287.1	5395.05
67.0564978419256_884.664982411169__[M+H-C4H8]+ 122.112_112	2540.85	2343.67	1874.3	2188.96	2123.55	2305.62	2210.6	2442.42	2137.46	2745.17	2448.67	2054.01	1225.61	1414.11	1025.36	1448.11	972.559	994.769	926.903	961.585	1162.47	1204.94	1383.52	935.046	3032.17	3173.72	3180.2	2314.4	2510	2085.38	2020.5	2496.9	1462.37	4486.07	3011.02	3570.74
67.0566491511692_618.429614532032___22	744.078	971.615	816.795	795.488	648.465	780.402	685.777	653.08	702.455	716.939	654.597	930.598	1416.06	1327.64	1310.77	1429.27	1046.92	1040.44	922.009	1258.07	995.465	1051.62	1232.4	1173.65	1214.8	1490.59	912.644	799.349	815.414	1056.11	765.481	578.35	671.503	1280.47	1030.4	776.28
67.0565366325773_797.293445243506___1925	722.321	5562.16	2649.41	891.362	673.488	593.022	411.222	471.052	377.57	499.909	552.963	444.521	472.881	548.765	424.131	6723.6	358.995	427.253	318.972	608.574	344.027	441.371	518.642	384.677	4376.17	13697	2232.35	3483.98	1013.09	4395	4308.5	538.046	828.827	4407.16	3414.07	1009.54
67.2572204591796_483.222067449307__[M+H]+ 66.2535_110	176.559	144.479	208.013	20.6988	63.4571	51.7918	30.7089	39.4735	28.5821	25.5924	0.058061	21.0825	24.9429	17.9838	33.4454	16.6313	23.3035	27.2683	18.03	3.27367	8.66177	0.0423771	9.89693	8.66174	19.5602	21.0978	28.4496	32.3691	17.6175	21.0381	13.8807	5.00997	11.2115	29.3262	13.1364	14.2097
67.5443832677437_1111.28928984519___892	0.0389307	91.4518	49.0953	20.646	57.4353	34.7209	30.7583	34.628	23.6997	57.7476	44.8089	41.9061	36.3655	101.319	147.111	165.916	125.486	152.215	71.8958	12.9713	128.789	132.246	59.8497	157.086	71.4739	81.8404	34.5259	21.5691	47.0819	52.8651	18.4819	24.9621	33.5397	29.476	26.2956	127.968
67.5631332422311_1073.26873642714__[2M+H]+ 33.2669_55	98.1162	109.08	160.913	58.4344	51.565	99.3563	86.9746	49.9511	62.302	77.6705	126.984	26.4819	117.713	89.1344	150.897	71.8313	78.4776	122.963	80.5076	116.968	69.0067	64.3633	69.5992	118.155	228.092	309.602	136.982	98.0102	160.727	122.908	98.1039	85.8053	101.532	154.379	151.074	178.393
67.7438378169089_1110.96313144314___19	38.2087	83.0231	61.285	32.9935	25.4932	28.8965	36.861	29.6401	42.6072	83.7039	25.5694	31.4296	36.319	71.4365	116.097	116.549	46.3436	156.662	67.4023	19.4299	98.7956	125.796	153.49	156.496	58.4181	42.2551	45.3345	48.4085	70.5373	42.2352	50.764	39.8385	78.0564	23.5183	17.5078	85.0954
68.0520586567376_1087.60870312068___33	4524.18	4165.1	4384.24	3987.85	3007.76	3354.05	3299.02	3322.64	3637.84	4219.96	3796.98	3971.41	252.293	267.72	220.839	304.422	203.411	138.427	206.058	208.273	209.588	239.398	226.104	215.453	643.543	409.961	817.739	559.875	521.14	364.055	616.13	821.554	475.032	728.622	581.876	477.897
68.0597780076404_926.665243727331_[1][M+1]+__7	549.065	645.59	341.503	485.988	337.573	318.917	273.474	289.649	243.934	481.025	385.132	314.331	332.688	318.56	283.391	277.362	205.418	220.752	255.835	221.938	315.902	348.018	398.518	252.339	594.521	698.363	587.768	462.271	500.712	401.079	414.313	464.372	411.253	643.407	434.637	448.98
68.0595255051545_982.705795834799__[M+H+Na]2+ 112.128_1	418.216	481.473	446.05	352.041	337.061	390.273	257.299	358.206	466.947	505.309	409.757	363.915	339.771	227.382	149.511	288.387	149.038	257.056	234.507	237.398	295.573	317.804	300.407	262.929	340.38	384.74	295.675	338.392	344.244	284.722	276.875	277.372	255.057	490.248	464.539	315.058
68.5590050885706_1035.54179285691___2244	55.2442	174.435	73.5949	74.3436	114.904	103.89	104.413	84.0143	61.6534	108.771	159.653	104.829	118.091	180.32	165.243	105.302	88.0415	92.3211	176.906	68.1171	91.1232	83.0497	118.225	235.736	129.753	175.78	113.268	96.8545	146.608	142.307	64.5646	109.588	89.1134	111.652	78.4932	152.044
68.6511682125612_483.962809506771__[M+3Na+K-H]3+ 99.0336_110	200.443	172.428	151.038	37.2118	88.8625	66.1861	30.7466	49.3414	48.6863	44.7742	6.37381	31.6234	0.0419457	42.014	33.4451	11.0871	18.6424	15.5632	4.50756	13.0945	17.3445	13.8894	0.0454262	21.6536	32.6014	7.04127	28.4838	37.8117	11.7606	26.3246	13.8812	20.0409	33.6342	29.3208	13.1365	21.3409
68.7363020859441_1110.44548653601__[M+K]+ 29.7699 [M+2K]2+ 59.5385_19	42.5151	107.93	67.4135	20.6515	6.37329	28.8965	12.287	9.88003	33.1801	38.4466	19.1771	15.7152	13.6196	29.8011	121.779	122.124	79.9205	108.92	62.8186	25.9065	60.6386	60.0533	64.0981	64.6591	84.4855	49.3219	68.0809	48.4664	11.7704	47.5146	32.344	24.9294	50.241	35.3227	26.2617	63.8989
68.7479695031451_483.438489165547___110	89.0782	218.779	217.091	99.847	31.7286	180.325	6.14787	24.707	19.0815	38.3886	25.4961	15.8119	4.58211	24.0076	50.168	38.8516	23.3035	15.6025	13.5388	0.0299218	0.0396735	0.0423771	0.0454262	8.66174	39.1205	14.082	45.5743	37.8146	23.5223	44.4505	23.1622	23.8924	0.0513705	23.4949	4.38414	7.1151
68.8545540509087_483.459814728279___110	292.086	286.082	349.969	98.7548	57.1114	86.3196	24.5915	54.3553	33.3458	38.3886	44.6183	21.0825	18.3285	24.0076	27.8711	16.6507	4.66069	27.2683	4.51294	19.642	21.6817	9.25733	0.0454262	8.66174	45.6405	42.2461	67.7993	64.8172	47.3539	42.1386	32.4271	20.0399	11.2115	58.7373	17.5152	0.0652299
68.9959617676983_128.268609233487___5724	25.69	8.29633	30.7079	552.667	760.311	614.442	1094.56	811.05	999.337	879.072	576.007	615.107	722.64	0.0549343	0.0509082	2638.82	1855.31	1353.37	0.0413265	820.308	1239.85	882.538	0.0454262	219.683	26.2177	28.345	28.6305	769.416	457.496	1186.46	0.0425389	1440.71	1799.52	488.013	0.0402583	904.38
69.0334766880626_126.912759993956___125	260.413	173.874	313.171	404.494	410.518	371.311	336.343	286.698	426.032	606.162	885.152	1113.14	0.0419457	0.0549343	919.016	0.0508358	0.042614	0.0356921	1561.03	1274.3	0.0396735	0.0423771	1812.66	1306.89	862.102	287.253	596.106	864.126	0.0539793	0.0482588	1306.04	0.0459168	0.0513705	2136.41	1623.33	2090.69
69.0355915609945_260.502118509649___123	1831.09	1890.76	1868.33	2556.54	1330.58	1083.87	814.028	826.14	923.732	447.144	450.624	566.054	134.117	144.97	112.282	184.582	206.351	166.635	286.54	311.541	257.654	295.807	244.262	302.03	239.973	277.062	252.756	269.155	242.043	275.744	264.918	201.715	226.198	483.996	285.892	442.527
69.0435104370117_1199.18852760857___235	0.0389307	15.9579	0.0558956	0.0378092	0.0579095	0.0525653	0.0559893	0.0451426	0.0434681	0.0583543	0.058061	0.0480593	26.6989	17.5023	10.813	21.6179	22.6289	11.358	21.9763	6.35587	16.8351	4.50062	4.81748	21.0102	65.9349	34.2374	0.0522024	0.049469	0.0539793	35.876	0.0425389	35.4819	0.0513705	5.70926	51.0985	0.0652299
69.0357186110213_285.463684320628__[M+3H]3+ 204.083_13	1364.56	1235.28	1356.24	2300.56	2640.17	2231.73	1778.82	2030.08	1732.3	1165.59	1090.84	1371.84	196.948	259.806	207.953	327.422	271.174	258.88	256.619	388.978	269.925	317.429	377.379	387.017	319.526	351.987	284.944	380.228	339.955	446.896	501.991	390.131	403.467	784.214	568.666	568.737
69.0358969425131_331.144700862123___68	734.458	835.67	876.886	489.933	484.051	472.173	440.979	420.416	533.024	314.161	312.806	357.503	315.051	240.3	250.731	194.602	202.651	261.039	175.981	191.405	149.444	152.651	212.737	174.531	322.946	244.753	287.642	305.138	159.101	203.959	308.228	310.077	272.639	534.956	382.866	284.845
69.0361462097485_374.037217568398___7849	300.81	297.205	312.053	263.36	222.054	316.125	147.431	283.677	195.083	315.051	315.029	321.929	245.713	263.438	244.829	288.12	153.741	177.665	235.342	200.567	187.087	209.927	301.148	237.901	306.415	291.765	264.679	355.887	275.431	376.46	353.738	345.152	347.846	602.005	377.83	383.808
69.0721967381795_891.174058641058___4	3732.22	4944.11	3838.06	3981.12	4128.08	3760.48	3643.59	3631.65	3415.34	4045.41	3604.69	3993.22	2258.83	2115.35	1736.93	2686.11	1522.85	1936.91	1837.82	1515.19	2396.31	2393.14	2563.88	2182.98	4969.57	5771.45	4878.09	4941.11	4623.95	4022.74	4229.56	4104.64	3522.96	6163.85	5200.59	5095.43
69.0722112933281_982.83201526246___1	17978.6	20294.8	17338	16151.7	15927.6	15623.5	14541.2	14876.9	14762.6	17846.5	15614.5	16965.5	11893.5	11357.5	9157.76	11901.8	9559.19	9629.74	10123.4	9272.69	11234.8	12077.9	12651	10433.1	15031	16696.5	15125.7	13808.8	13907.9	11326.5	14549.1	12592.5	11387.6	19004.5	15792.7	15495.8
69.0722211768915_929.549060164181___94	5524.4	6144.77	4457.46	4391.65	4687.03	4288.21	3547.93	4394.02	3645.3	5715.73	4364.57	4768.78	3548.65	3306.74	2470.94	3164.64	2998.67	2645.85	2648.74	2629.71	3932.71	3634.32	3781.63	3133.26	7078.84	7325.75	6703.24	6145.24	5648.12	4771.79	5373.68	5496.26	4449	8254.2	6452.69	6906.29
69.0721908294609_1057.70092992873__[M+3H]3+ 204.19_9	2680.07	3071.57	2044.08	2263.26	2043.46	2027.74	1842.98	1957.87	5553.67	2437.56	2260.03	2152.67	3127.64	5614.84	4419.18	5488.74	4912.2	4073.07	2945.52	2906.99	4050.26	4336.49	3344.69	3141.61	3570.58	4424.86	3346.37	3301.1	3725.27	3005.31	3112.17	3251.18	2619.2	4360.93	3749.89	4216.53
69.047091903607_1093.85212133018___33	8004.04	6955.58	5627.93	6898.68	6477.46	6075.2	5689.53	5795.59	5669.57	5894.56	6035.39	7457.87	667.236	1056.85	1025.24	915.105	855.412	929.878	369.377	1689.45	901.544	936.462	420.979	539.613	2205.39	1000.3	2602.4	2299.12	2324.66	1080.76	3186.3	2871.21	2178.76	3126.52	3339.71	2699.39
69.0721723456308_840.896293165277___26	855.522	2744.6	1368.32	899.362	813.222	883.277	525.456	491.169	532.644	682.396	454.144	643.244	1937.3	2374.61	2018.33	4106.6	1878.88	1719.9	1532.7	1909.77	1538.76	1793.14	1553.65	1668.49	3256.19	3892.79	2444.78	2269.47	1498.6	3217.08	3306.13	1885.66	2128.41	3085.66	2939.66	1790.83
69.0721357793524_799.215061158168___39	1037.04	3744.86	1336.04	1120.37	1111.38	1123.26	733.656	732.026	813.394	866.738	925.743	868.382	547.722	663.542	549.569	2794.07	494.712	634.742	413.64	560.696	641.582	673.308	752.578	606.722	3120.43	4557.37	1776.83	2642.27	1375.77	2665.83	1973.34	1077	1223.51	4014.17	2028.62	1667.42
69.183318570249_1005.85991260546___31	55.2066	131.812	188.804	152.504	70.5165	51.7869	61.0371	83.7314	158.219	113.63	238.295	150.909	124.637	53.6869	60.765	33.1207	46.2506	38.6201	49.3488	32.5129	60.9159	101.051	63.9992	81.0174	131.79	235.133	113.779	167.836	129.447	116.147	235.425	219.317	199.225	171.133	79.1219	64.0534
69.3720151835461_1005.58619906152___31	68.0101	107.239	244.21	247.525	258.056	74.903	78.003	78.9188	231.041	294.425	360.187	141.422	100.472	53.7474	71.8981	60.8534	69.4636	65.7216	53.8997	26.0386	60.503	69.1356	78.8546	103.372	156.615	421.219	236.449	258.454	219.261	186.964	298.37	334.014	572.498	200.849	79.2788	57.0833
69.368957756342_986.359056838968___48	93.3485	164.161	158.021	82.3061	119.693	91.6249	73.0911	127.777	113.68	177.953	120.157	105.846	187.747	216.611	424.501	190.577	98.9756	133.579	109.847	42.305	156.28	208.831	149.593	292.943	113.617	180.192	131.164	93.9749	90.1839	86.2207	129.551	97.5547	154.495	164.352	77.9565	116.47
69.5638922443669_986.248429515251__[3M+3Na-H]2+ 23.7224_48	145.397	174.503	156.846	74.956	108.355	57.9541	137.857	108.716	81.4956	160.79	137.541	132.317	95.9632	165.728	345.385	166.302	90.4173	85.2679	145.897	83.999	104.168	116.583	103.58	151.089	145.574	158.282	168.844	152.333	132.041	181.364	77.742	143.487	108.538	195.111	120.994	109.005
70.0146778520981_1138.67669731939___7942	187.131	240.828	189.532	160.614	189.634	179.467	104.415	132.994	198.714	228.567	221.748	195.928	341.299	392.705	291.345	171.254	216.015	255.129	214.345	172.824	240.944	282.687	191.115	296.535	471.424	346.848	367.621	332.142	333.119	142.426	300.737	308.983	240.836	199.793	319.395	380.689
70.0742242493212_982.414457067024___1	2378.58	2195.4	344.25	2112.52	2459.1	1665.91	1714.11	1866.62	241.126	2561.74	359.941	272.39	1030.22	703.142	761.064	979.851	721.587	716.431	836.968	770.279	992.91	950.16	1013.44	915.868	1496.8	1510.11	1437.55	1348.28	1210.85	1062.55	1459.8	1188.63	1096.09	1708.25	1715.98	1313.59
70.0676574733951_1088.23051305594___33	17638.9	21389.2	19466.7	16193.8	16898.3	15911.7	16649.5	14907.5	16158	18676.5	17390.2	17828.5	471.062	428.135	466.71	616.807	445.401	312.437	307.216	545.067	322.184	494.427	467.434	396.897	3041.17	2149.28	2887.04	2256.17	2327.28	1757.82	2731.18	3746	2135.31	3033.06	3081.72	3546.9
70.0628279858006_127.842054940051___125	263.433	480.223	416.07	293.212	370.086	330.866	240.376	370.598	300.248	360.066	493.393	579.188	715.832	891.765	602.879	0.0508358	366.213	0.0356921	675.988	413.675	323.378	0.0423771	694.256	0.0395657	1021.31	976.369	1052.15	915.454	705.279	890.134	971.127	263.644	843.758	3351.38	724.039	2142.67
70.0712957195741_927.136463386154___7	873.793	835.901	860.865	754.77	602.033	768.093	679.997	671.209	813.56	815.896	603.579	838.144	478.303	415.778	304.319	345.618	320.321	290.295	283.652	368.096	438.035	478.708	416.431	432.933	845.94	888.355	716.086	926.537	956.285	637.904	857.59	673.036	715.585	1017.49	1098.32	970.945
70.0678949334313_702.794051021357___5021	186.545	249.332	173.714	181.692	235.062	186.599	167.901	189.806	232.635	284.177	270.399	276.699	183.476	155.705	245.087	244.929	144.704	128.821	144.893	140.523	121.134	203.374	178.385	160.214	788.899	844.385	827.636	799.625	795.154	512.61	777.862	783.346	680.481	1042.14	810.171	804.128
70.5825883476052_984.318333455087___1	42.9289	199.315	92.2633	58.2764	76.4546	121.652	92.4539	119.361	105.449	70.7158	127.897	58.2224	359.45	89.5714	320.146	60.525	110.987	89.0999	161.912	83.4807	102.77	139.544	117.9	169.115	151.277	172.775	74.7239	147.067	77.895	153.583	75.0452	85.9905	118.429	125.308	61.5948	71.7301
70.7873091211246_984.859601105651___1	64.4105	157.836	154.029	58.9849	59.3596	118.363	117.106	69.635	62.3153	57.8724	126.767	100.554	272.707	125.386	357.784	72.436	124.689	108.463	102.388	64.9445	136.743	208.805	112.95	185.832	139.263	201.49	130.367	132.483	142.909	107.581	66.5366	138.186	57.0651	111.051	58.6458	108.871
70.9446240624082_1119.0236345617___4673	4.23542	206.859	97.7524	8.2254	171.485	120.974	98.002	73.8346	70.8391	102.182	159.256	20.8568	140.198	225.874	301.05	266.685	249.896	166.985	275.034	124.193	186.625	177.453	202.346	192.488	155.359	151.529	147.184	107.379	146.642	110.475	179.318	84.4806	77.8762	129.008	187.434	155.651
70.9448658609503_124.733526325028___125	50.8263	32.808	18.257	57.5312	31.5433	57.2852	42.6623	34.3301	18.9151	44.4375	12.66	83.6383	715.423	411.021	328.202	698.35	282.414	221.557	474.409	42.3234	300.013	0.0423771	512.105	81.8397	64.9281	454.224	418.058	150.095	76.4292	282.402	83.3037	49.9522	55.9023	52.7721	92.0107	127.647
71.0514968329115_402.35428156519_[2][M]+_[M+Na]+ 48.0624_8	11920.4	11556.7	11158.9	9061	8072.42	7716.63	6285.84	6343.65	6741.79	6083.06	5884.75	6716.94	14015.6	14285.1	13295.4	11648.1	11074.1	9921.22	6918.48	7196.93	7233.67	6458.75	7830.27	6488.84	8000.38	8160.87	7540.05	7648.71	6990.44	6779.95	5882.15	5506.35	4902.75	5674.98	4831.19	4752.67
71.0516559409549_474.791002973294___10	5268.98	5161.21	4931.71	2877.84	2439.12	2490.77	1726.04	1749.8	1750.43	1682.74	1669.35	1572.66	3745.14	4177.93	3761.85	3177.99	3058.05	2673.34	1360.37	1528.72	1604.51	1158.85	1535.87	1481.28	2310.58	2661.52	2684.29	2688.69	2320.49	2367.25	1598.82	1907.69	1394.63	1913.09	1377.69	1485.61
71.0515824313053_331.16786096743__[M+H-CO]+ 98.0379_68	835.243	685.438	128.024	1222.79	1227.58	1127.75	526.786	536.204	670.178	842.33	440.206	441.64	1949.96	1776.96	1984.17	1430.96	1253.13	1154.27	724.987	635.884	593.803	504.092	653.768	590.014	442.72	610.074	530.011	501.396	461.78	584.982	474.279	573.776	350.333	511.283	409.078	578.174
71.0633289040915_1081.34967674731__[M+3H-H20]3+ 228.19_93	4672.23	4238.58	4071.16	4091.9	3892.85	3686.46	3313.95	3790.23	3691.26	4084.1	3947.3	4101.13	509.508	508.28	438.669	421.614	426.167	361.434	420.842	457.072	368.219	415.258	395.607	379.914	6412.57	5877.62	5750.98	5573.7	7085.27	4567.4	5696.84	5924.28	5735.89	7585.82	7213.18	8543.75
71.0628544875289_1105.74049660379__[M+2H]2+ 140.108_84	1097.98	1295.32	1149.82	1087.84	1022.52	905.748	894.741	1041.43	924.901	1101.15	4593.17	1122.41	279.852	290.165	343.179	274.818	287.982	301.362	294.828	229.675	271.737	274.867	238.828	226.439	1966.19	2132.98	1819.39	1659.68	2117.02	1566.62	2043.66	1783.56	1593.12	2257.37	1928.35	2204.15
71.0876449352682_982.682114398541__[M+2H-CO]2+ 168.154_1	827.198	1071.29	852.901	606.959	809.794	604.016	646.439	608.673	604.786	831.006	758.229	636.874	494.41	498.427	515.859	521.203	387.336	448.336	378.895	500.598	467.292	540.015	543.017	518.863	717.667	749.304	663.655	581.367	684.07	603.524	646.046	639.434	570.498	701.548	1123.16	1208.92
71.0878998859115_927.456438385106__[M+H-COCH2]+ 112.093_7	390.244	559.954	289.788	227.355	345.244	314.075	337.677	330.169	306.644	362.779	336.676	365.744	248.62	303.077	193.797	190.974	185.108	205.056	203.165	195.986	272.918	280.806	227.192	227.128	441.016	456.189	419.076	399.779	371.399	340.734	403.07	446.833	246.309	590.527	498.208	488.51
71.087557286872_801.061179944388___28	56.2997	914.29	229.587	133.464	122.046	145.936	74.6541	55.1387	82.0165	123.084	83.9174	74.779	46.2453	96.5002	67.42	795.462	32.922	47.1528	36.3579	56.2053	21.8003	55.9949	64.9046	43.7332	1399.84	1615.18	188.079	820.442	167.967	770.279	271.593	110.398	152.078	1288.75	513.464	128.643
71.2065344915548_984.785186908429__[M+H-C6H8O6]+ 246.236_1	64.3933	99.5077	104.565	33.3631	127.643	81.2403	55.5682	64.6537	189.597	119.041	57.6533	99.3119	82.168	179.386	94.0161	132.894	51.7988	73.6503	89.4653	42.2569	119.826	138.477	133.513	155.292	111.814	165.845	120.708	70.8102	83.8869	100.853	56.2839	70.8157	124.068	158.264	54.1346	50.211
71.4751242229295_400.041252388207___8	183.863	112.636	197.628	100.407	76.9371	121.724	43.4886	99.8684	101.087	90.5713	70.8856	69.1912	133.838	91.0632	61.9345	78.5393	56.5269	27.542	9.11047	16.5281	35.0391	9.35291	40.0124	74.3351	79.1579	56.9611	115.171	70.8581	41.69	42.568	70.2679	75.9239	28.3126	71.182	48.6852	35.9839
71.7546679926898_121.370069048532___221	0.0389307	8.25634	0.0558956	4.14889	0.0579095	0.0525653	0.0559893	0.0451426	9.52895	6.40703	6.38288	5.27549	0.0419457	0.0549343	0.0509082	0.0508358	0.042614	0.0356921	0.0413265	0.0299218	0.0396735	0.0423771	495.97	0.0395657	652.306	359.471	290.558	5.41866	0.0539793	0.0482588	0.0425389	0.0459168	0.0513705	300.463	0.0402583	0.0652299
71.8673363767299_476.862359722095___593	64.4851	58.3238	68.0155	29.2414	63.9269	75.3869	55.1578	49.8874	28.8031	38.6979	32.1053	31.8793	18.482	42.3707	16.8521	22.4106	23.4819	15.7045	18.2126	26.393	13.1089	32.6534	9.98886	26.1845	19.7168	49.6819	28.7033	38.0906	11.8551	21.2235	14.002	25.2482	11.2992	35.5612	30.928	28.6855
71.9431600156402_1125.04862918453___6219	390.188	594.686	631.865	298.241	592.047	519.401	529.979	527.067	307.542	1836.31	507.143	266.241	682.664	955.41	919.378	1013.83	840.479	639.652	823.405	397.761	856.174	690.32	903.335	707.173	565.295	577.024	667.066	598.84	630.995	441.624	952.34	472.148	469.674	1036.58	1062.87	667.643
71.9358664220826_122.800428097895___7237	21.3044	8.2358	24.4395	8.27815	12.6699	11.506	0.0559893	29.6099	28.5012	147.589	12.7321	5.25868	344.826	823.833	0.0509082	289.616	782.909	0.0356921	0.0413265	166.47	768.744	341.51	0.0454262	43.2682	371.814	35.2402	353.227	70.245	631.947	52.7703	50.4783	55.1656	56.1493	76.5778	268.953	92.6276
71.9361852314959_1200.18988828962___8385	0.0389307	0.0751286	0.0558956	0.0378092	0.0579095	0.0525653	0.0559893	0.0451426	0.0434681	0.0583543	0.058061	0.0480593	74.1381	78.8816	118.166	94.3647	122.148	37.3146	41.3396	55.9811	112.95	83.8957	48.1695	61.2678	39.5609	21.2972	0.0522024	0.049469	83.0745	0.0482588	0.0425389	0.0459168	0.0513705	0.0539001	92.4486	0.0652299
72.0544656873353_401.794351593986_[2][M+1]+__8	646.372	497.806	716.935	414.196	410.537	441.476	242.63	381.124	342.191	365.6	251.798	314.666	722.459	941.472	735.149	608.693	604.674	230.608	357.073	435.788	377.472	389.692	445.499	383.458	440.828	368.889	453.551	462.702	451.764	438.925	497.095	312.115	333.448	329.144	348.647	291.338
72.0537405301437_474.569001837488___10	379.071	270.439	251.533	178.388	158.781	172.828	149.839	92.6307	143.139	144	64.6131	190.094	323.698	230.848	268.533	138.999	240.545	97.3959	90.3618	104.769	120.5	105.345	109.132	122.211	260.894	161.917	183.786	290.705	214.601	163.181	135.802	160.348	84.0701	205.787	170.047	64.0193
72.0832953905658_982.612121836985__[M+H+NH3]+ 54.0493_1	1877.26	1830.86	1855.65	1256.47	1672.92	1386.55	1512.59	1374.39	1292.68	1652.62	1593.91	1429.93	1082.99	803.222	837.184	966.139	742.402	813.165	875.425	827.169	860.306	1082.76	935.831	876.599	1026.56	1278.7	1121.88	818.801	1015.31	839.089	1220.11	1014.64	928.66	1396.86	1144.28	1074.9
72.0828452999998_287.605504087767__[M+H-NH3]+ 88.1002_13	4099.04	3389.14	3757.41	4452.46	3221.21	3870.08	3990.87	4741.4	4395.29	2877.36	2280.93	3107.93	619.261	522.116	571.367	510.172	352.927	386.726	344.004	431.273	329.528	945.03	1628.4	1190.75	1759.17	2496.68	2135.29	2642.94	2175.89	2996.58	2393.62	2660.6	2199.12	3667.56	2658.03	2897.4
72.0832726735895_928.175472566284___94	798.458	1000.81	765.192	826.778	639.447	709.221	616.341	752.783	783.055	790.929	722.892	935.012	745.382	480.994	544.836	441.943	555.527	479.833	470.786	546.117	546.244	638.049	473.724	593.19	869.363	942.616	1006.76	788.683	850.916	674.595	726.994	731.347	758.809	1341.06	926.833	974.222
72.0790589703375_128.507177560405___125	307.167	248.89	251.953	253.411	222.935	173.461	295.847	355.659	313.976	243.941	262.403	269.619	315.439	0.0549343	1256.27	0.0508358	0.042614	0.0356921	0.0413265	384.104	369.331	1005.41	1225.39	813.836	1333.72	1006.93	300.228	575.075	630.537	285.997	722.173	716.921	384.874	611.825	933.544	711.439
72.0830911963913_890.742748978744__[M+H-NH3]+ 88.0991 [M+H-COCH2]+ 113.088_4	744.664	670.141	527.598	584.728	531.744	547.175	545.768	553.69	563.344	741.096	584.824	606.105	580.954	406.087	382.111	423.806	330.547	391.794	408.7	465.177	543.782	447.066	586.686	369.67	875.774	688.101	796.037	772.509	556.544	593.516	693.528	549.837	523.381	852.033	828.125	709.857
72.0826987883283_1090.55483540084___33	4775.15	4260.55	5274.15	4876.94	3893	3538.7	3545.32	3935.42	4072.89	4103.72	4266.83	4598.94	903.353	852.615	698.909	838.113	601.483	663.84	613.479	870.863	653.247	680.727	662.059	634.841	1594.5	1352.29	2020.12	1398.73	1306.92	890.318	1790.36	1741.33	1302.76	1758.17	1616.52	1492.12
72.0830750590617_535.908468535517___6844	568.913	352.589	464.188	553.923	533.445	529.664	368.113	356.013	415.875	371.302	242.594	242.676	583.886	710.745	650.742	457.825	475.431	581.527	275.279	286.982	298.611	356.063	400.459	405.369	730.153	695.538	952.457	691.171	675.24	971.7	575.537	493.205	505.466	557.89	484.038	450.027
72.0832712196335_1200.09219721761__[M+H]+ 71.0749_236	0.0389307	0.0751286	0.0558956	0.0378092	0.0579095	0.0525653	0.0559893	0.0451426	0.0434681	0.0583543	0.058061	0.0480593	66.7473	87.4158	60.8852	75.5884	54.3114	45.4368	70.2274	0.0299218	54.7248	44.9647	75.9937	46.2685	101.393	27.3803	0.0522024	0.049469	0.0539793	0.0482588	36.1795	92.5711	0.0513705	0.0539001	0.0402583	0.0652299
72.2424287274949_1105.41766299429___84	21.2558	50.614	18.4142	82.6097	51.052	157.4	146.535	119.211	90.0674	112.806	115.901	122.336	50.6956	11.9329	55.3548	33.3397	9.27913	66.4953	13.5005	45.3216	17.3435	18.5019	40.0936	34.5462	104.082	118.627	80.5506	192.847	163.658	192.277	217.855	229.565	202.025	147.969	193.666	245.72
72.4444866554053_1105.42294906037___4082	42.5115	151.842	61.3807	74.3487	89.3411	57.8887	98.4423	56.4397	50.0113	79.0595	141.554	71.8795	40.7806	23.8658	38.8003	33.3397	30.3446	39.1149	18.0007	6.47451	13.0076	37.0039	30.0702	21.5914	78.0614	112.897	62.7843	160.944	116.693	42.9213	78.6288	159.669	99.1486	183.1	115.44	179.265
72.6151348267767_987.584959672477__[3M+H+K]2+ 35.0857_48	50.9789	129.643	79.1098	65.8642	50.3972	97.3745	57.752	44.2859	66.3958	95.6063	113.869	68.0797	142.162	104.964	303.177	157.096	124.829	69.7712	203.735	26.0606	141.998	125.004	64.9602	201.055	98.6481	113.875	91.938	98.0307	109.8	106.22	60.9203	70.8291	90.3009	105.819	35.6134	150.632
72.8243389888001_987.16368149947___48	72.2202	106.739	48.683	53.577	31.4982	74.5443	91.4764	43.1704	61.6532	76.385	69.6567	62.8428	116.15	151.655	331.625	149.449	46.2331	62.9735	185.368	35.8333	91.4566	83.9221	89.7727	214.071	118.378	135.227	80.4457	81.6923	46.0578	63.7319	28.1171	50.673	90.3749	95.2332	26.71	118.451
72.9400624817605_1122.28922149531___134	169.572	2157.76	921.131	124.914	1463.27	1702.07	1639.85	682.822	309.534	1388.72	1891.39	243.114	2503.47	3770.73	3581.98	3735.44	3041.24	2263.18	3142.55	1569.12	2640.83	2778.15	3211.61	2680.7	2145.84	1910.04	2593.16	1543.92	2047.21	1436.52	3142.94	2123.37	1853.76	3528.24	3135.42	2202.93
72.9367412096983_129.199784279359___125	1235.49	1081.86	1158.26	1061.79	795.497	822.118	792.885	182.986	759.283	1032.86	871.481	1152.65	5237	7648.81	5023.59	6078.43	3555.3	4213.08	3773.81	2386.05	3514.64	4517.8	3244.96	2809.38	974.394	2794.11	2954.34	7065.1	3692.12	2698.14	3178.47	2497.13	2180.31	4666.53	4038.79	1342.93
72.9403517250586_1201.28800153261___8372	0.0389307	0.0751286	0.0558956	0.0378092	0.0579095	0.0525653	0.0559893	0.0451426	0.0434681	0.0583543	0.058061	0.0480593	157.82	192.732	318.078	204.573	65.2556	183.119	74.3897	0.0299218	189.342	144.025	164.038	0.0395657	0.0597342	0.0645454	0.0522024	0.049469	0.0539793	0.0482588	0.0425389	0.0459168	0.0513705	0.0539001	0.0402583	0.0652299
73.0319591196811_309.701306328847___104	422.72	463.94	311.247	99.406	152.204	144.095	110.62	74.1541	133.15	153.442	178.667	94.7806	245.329	240.607	280.545	105.281	116.401	89.4132	155.754	108.188	77.9454	101.891	84.071	112.448	334.335	598.529	337.328	91.9741	82.3646	131.598	97.8661	115.125	50.4148	129.147	103.147	128.12
73.0675680516923_786.120878980896___21	276.888	357.171	299.055	145.904	88.5458	63.0909	67.3389	128.259	99.694	89.2281	95.3127	78.7748	137.749	78.2996	89.6225	128.304	79.7394	74.2875	58.9683	136.582	91.2663	125.503	94.5235	126.716	163.114	190.914	187.72	145.377	88.2699	153.045	175.176	200.278	161.834	200.712	162.316	163.608
73.0664841799722_575.472816420552___207	106.637	99.1428	79.6698	91.1646	76.2833	40.3603	73.9139	123.487	66.7937	76.9542	57.4432	121.309	153.093	122.123	139.448	73.3756	88.7174	95.0656	73.4856	112.988	114.392	94.1275	95.6598	129.932	99.4776	162.171	119.72	121.141	129.737	47.4678	115.94	105.361	50.4906	117.56	92.1593	142.588
73.0776221250513_1086.2054584767___33	1264.62	1201.43	1658.25	1591.46	909.896	1386.96	878.277	587.259	1674.34	1165.03	806.031	1430	229.76	178.894	149.364	232.673	157.499	255.982	148.125	201.656	116.863	129.164	265.316	209.711	424.782	443.859	450.409	307.339	484.117	356.516	393.742	368.317	439.201	540.189	385.236	533.834
73.0854036775613_287.636830881468___13	200.359	140.234	164.758	333.513	230.021	224.203	226.947	206.791	236.467	166.283	133.362	193.92	64.111	29.9448	50.1642	44.3628	41.9276	39.3807	31.561	29.4324	12.9955	64.6759	69.1261	73.5415	124.043	112.569	136.626	205.309	111.92	192.565	151.477	210.079	116.963	199.368	131.254	163.398
73.0704496755412_123.270202590893___7246	61.311	41.179	42.7691	24.7643	12.6699	5.75302	6.11528	61.0697	33.2514	31.8613	31.7585	62.9654	32.0897	0.0549343	0.0509082	0.0508358	255.58	0.0356921	0.0413265	49.0597	0.0396735	0.0423771	283.398	0.0395657	58.5722	56.2569	289.366	43.2277	41.3423	15.8311	0.0425389	0.0459168	50.5344	617.149	230.714	377.689
73.1743018076853_123.245774172587___7247	4.25071	0.0751286	0.0558956	0.0378092	0.0579095	0.0525653	0.0559893	4.92156	4.72787	0.0583543	0.058061	0.0480593	238.348	0.0549343	0.0509082	287.563	0.042614	0.0356921	0.0413265	6.52478	0.0396735	0.0423771	0.0454262	0.0395657	0.0597342	0.0645454	0.0522024	281.817	299.838	274.406	0.0425389	0.0459168	0.0513705	0.0539001	0.0402583	7.1053
73.2864506114604_122.686738606318___7248	4.26088	0.0751286	0.0558956	8.27815	0.0579095	5.73892	0.0559893	9.86998	0.0434681	0.0583543	6.36606	5.25868	0.0419457	0.0549343	0.0509082	0.0508358	0.042614	202.574	0.0413265	0.0299218	0.0396735	466.114	0.0454262	0.0395657	323.643	0.0645454	0.0522024	0.049469	0.0539793	0.0482588	0.0425389	0.0459168	0.0513705	0.0539001	222.803	0.0652299
73.5124395908554_418.815975209859___6252	154.226	49.5912	141.155	70.3533	44.4252	40.3611	49.2058	59.3125	61.94	44.8721	25.4806	26.3714	22.9568	24.0193	33.4761	33.305	14.0052	15.5624	36.1159	22.9095	21.6809	41.6287	14.8475	25.9782	13.0692	49.293	51.3778	48.5938	23.5706	21.0873	4.63568	10.0293	39.298	58.6894	17.5175	28.4704
73.6348243193547_1005.58083955845___31	21.2793	141.435	189.667	53.7265	138.17	80.6648	110.16	93.8379	227.557	307.127	284.165	120.704	27.4344	47.7755	82.9593	49.8677	32.4594	38.7017	22.4884	6.51745	43.1694	64.4533	19.7372	112.489	183.811	446.084	220.527	366.518	178.212	195.205	559.224	265.678	588.103	47.3096	26.451	7.13071
73.6265866623771_987.494868257981___2357	46.7477	114.95	99.3841	12.3646	56.7727	57.3532	54.8965	88.5872	62.44	76.4	119.7	26.1935	277.025	209.168	471.607	198.052	187.759	110.624	422.956	33.0148	193.816	113.784	142.736	431.989	72.3419	113.891	63.2074	32.7146	88.8551	63.8095	23.4309	101.287	73.3188	35.7632	66.7588	50.2107
73.7140289392734_418.067852761323___38	80.919	210.404	144.949	49.6612	31.6532	51.7704	43.0551	39.5417	61.7831	6.39238	31.8124	21.0442	27.48	47.9805	55.6459	16.6327	51.2172	15.5442	31.5557	22.9095	21.6437	9.25083	14.8264	12.9726	32.5881	35.1584	45.5403	43.1336	17.6557	36.7994	27.78	30.0083	16.8023	11.724	39.3677	35.5521
73.8344993877785_987.640739503972___48	29.7485	139.582	79.0269	24.7292	82.005	80.2944	54.8965	73.8227	75.4192	155.422	90.8038	26.1935	112.693	193.556	546.761	235.548	180.834	129.88	462.829	37.8725	214.869	247.551	120.839	279.595	111.801	177.955	97.6841	120.846	59.3226	42.4879	51.548	96.1252	75.7655	71.5264	49.0351	93.2485
73.8451156630395_1004.94993144154___31	42.626	115.793	194.093	128.116	63.414	137.785	61.2756	64.2887	285.856	240.133	300.937	94.1788	72.4444	83.7127	73.5903	33.2868	41.7894	54.9015	13.5104	29.3696	47.595	69.2401	54.2755	56.1464	156.999	565.958	276.409	366.336	198.519	206.065	606.515	311.701	801.48	131.426	57.4184	99.8958
73.9474412918226_1195.87774105542___208	0.0389307	0.0751286	0.0558956	0.0378092	0.0579095	0.0525653	0.0559893	0.0451426	0.0434681	0.0583543	0.058061	0.0480593	122.816	145.031	178.151	139.972	108.303	105.227	116.729	119.207	99.4589	132.293	0.0454262	153.415	0.0597342	84.66	0.0522024	0.049469	0.0539793	0.0482588	0.0425389	0.0459168	0.0513705	0.0539001	46.9417	0.0652299
73.9283555471249_413.605353902111___38	272.906	302.305	258.901	58.2301	107.51	62.8329	104.286	110.685	134.671	94.3826	63.563	68.2997	27.803	48.5615	61.9427	33.6594	23.5603	35.4046	31.9452	26.5068	39.4109	9.34513	20.0165	17.4948	19.7979	56.9611	46.0783	21.8187	23.8199	53.196	37.4786	55.6818	51.0127	23.7432	35.41	35.9913
74.025242869107_128.165019395586___5725	25.7351	16.626	18.4902	87.5923	70.3268	92.8649	68.0439	146.179	180.813	92.4135	32.1195	84.9183	13.6055	0.0549343	0.0509082	0.0508358	366.375	0.0356921	0.0413265	51.768	0.0396735	0.0423771	386.703	51.3709	96.4683	104.629	112.835	123.836	128.225	344.601	110.341	425.415	379.488	950.28	299.703	466.688
74.0484187255818_987.439245091119__[M+K]+ 35.0857_48	70.7518	147.793	67.6585	33.6565	50.3972	34.4051	106.029	49.2065	90.1085	120.943	114.932	64.8656	456.593	174.621	433.911	87.8332	164.558	90.5245	239.153	13.0303	123.107	168.125	84.7853	361.597	105.225	56.9376	68.9535	59.9077	47.401	69.0429	60.9203	76.0095	39.539	71.4249	93.0325	122.961
74.0625375684066_1092.43589012925___33	10678.7	7540	7838.02	8594.66	5641.95	6638.92	6826.64	6546.74	7687.56	6832.58	7114.14	8338.78	2032.86	1874.64	1833.61	1127.12	1002.9	1317.63	849.21	2707.04	1094.48	1030.84	1538.83	1533.91	2321.41	2106.01	2792.24	3187.75	2431.56	1970.98	3316.94	3001.93	3137.76	3854.78	4153.08	3532.09
74.0920072755803_128.180384033574___125	424.495	174.957	216.247	266.303	51.2597	110.525	92.9859	138.3	230.557	135.643	173.823	138.29	1323.56	693.986	390.954	713.172	0.042614	0.0356921	288.282	847.416	0.0396735	339.574	0.0454262	196.197	565.68	174.557	434.907	274.033	169.382	335.18	264.5	196.458	178.062	350.229	369.74	127.081
74.098872128766_1200.45209636008___8386	0.0389307	0.0751286	0.0558956	0.0378092	0.0579095	0.0525653	0.0559893	0.0451426	0.0434681	0.0583543	0.058061	0.0480593	71.2931	58.291	62.8734	53.9931	52.493	94.5911	65.842	16.6285	8.41279	58.4565	53.0222	75.3782	0.0597342	0.0645454	0.0522024	0.049469	0.0539793	90.2416	0.0425389	0.0459168	0.0513705	0.0539001	0.0402583	0.0652299
74.127019809033_413.435845066648___38	323.996	290.523	292.872	127.418	178.996	162.616	84.9448	59.2121	109.586	106.725	76.2564	78.8252	27.8021	42.4912	16.8939	28.0491	9.42442	7.86605	18.2501	13.2306	26.2735	9.36032	10.0059	26.2414	39.5955	35.6006	57.5999	87.275	35.7297	37.2374	42.1728	45.5597	17.0041	41.5506	22.1362	28.7931
74.3357663139023_398.089164769316___8	4033.5	5186.29	5400.36	1452.62	3422.14	2630.71	2353.84	2023.29	2175.27	2368.42	2255.28	2141.83	971.252	2462	2739.26	1872.85	1369.91	805.509	647.934	625.338	820.213	381.318	659.798	523.749	1560.78	1712.58	1877.72	1615.29	1699.8	1428.32	736.118	863.122	645.267	465.575	215.856	349.394
74.5442741677121_398.095841246446___8	3397.94	4582.33	4371.36	2616.09	2709.59	3169.11	1683.41	1885.31	1801.07	2282.36	1454.81	1696.9	2919.15	2584	2782.35	1910.4	1374.07	1742.93	637.465	696.327	623.822	419.771	545.473	445.904	1284.38	1580.31	1599.1	1570.37	1268.86	1519.66	377.504	722.184	468.373	400.742	182.144	269.066
74.75312838403_398.14451188579___8	1893.23	2718.47	2365.59	1414.32	1585.49	1683.71	1588.14	1133.07	1207.62	1063.17	1087.4	1095.75	1407.39	1218.67	1482.04	1081.96	637.124	987.519	299.081	394.645	357.272	225.1	282.045	255.94	713.34	1167.34	687.897	738.708	627.685	435.825	218.016	286.783	258.013	264.9	103.251	228.824
74.8025458840688_121.597263783448___7249	4.27269	0.0751286	6.11193	0.0378092	0.0579095	0.0525653	0.0559893	0.0451426	0.0434681	0.0583543	0.058061	5.27549	226.875	0.0549343	0.0509082	0.0508358	0.042614	0.0356921	0.0413265	654.381	0.0396735	0.0423771	743.955	0.0395657	13.0818	7.06777	11.4248	0.049469	0.0539793	260.668	0.0425389	501.63	0.0513705	305.636	0.0402583	0.0652299
74.9397799648056_1124.896598542___134	755.366	580.783	506.708	543.387	495.645	569.954	474.91	358.789	426.577	588.423	509.968	470.29	828.584	726.931	651.698	723.373	602.533	653.531	556.549	562.376	651.595	643.251	730.95	620.792	822.399	527.523	1025.43	794.112	1003.47	801.903	1179.81	1037.32	994.703	1485.5	1277.39	1074.66
74.9615928676521_398.063550899536___8	886.848	1174.66	972.674	684.828	641.384	759.543	489.164	518.42	544.886	554.921	502.875	557.406	250.091	677.057	611.946	373.768	443.277	319.048	57.3267	139.257	138.815	65.0817	135.504	83.0326	405.798	381.078	315.138	442.61	198.054	325.245	120.484	265.08	264.377	174.224	122.584	78.3173
74.9455390931948_1199.93450325398___8373	0.0389307	0.0751286	0.0558956	0.0378092	0.0579095	0.0525653	0.0559893	0.0451426	0.0434681	0.0583543	0.058061	0.0480593	53.4095	52.384	16.221	48.5925	27.1564	26.4855	17.5544	26.4583	67.3214	31.5044	38.5616	35.8097	0.0597342	20.5424	72.0703	26.2716	0.0539793	0.0482588	63.2544	0.0459168	39.6968	28.5877	46.9079	50.4061
74.9495815529985_127.024921638526___125	109.794	116.929	78.8299	73.7701	50.2997	39.9724	62.1447	63.5912	37.7312	107.776	32.2686	52.2049	474.199	1305.02	835.036	0.0508358	1416.8	572.613	0.0413265	352.962	989.72	1527.99	720.717	257.495	245.979	180.221	218.383	134.059	146.492	129.607	618.392	189.178	859.518	708.343	720.933	855.098
75.0466858293884_481.85212702212__[M+H]+ 74.0391_110	258.546	273.654	171.322	172.119	152.079	103.456	126.503	99.3165	114.591	115.032	63.6502	78.9828	91.5369	113.776	111.342	121.963	93.0925	134.275	49.5718	104.476	34.6477	27.7328	79.175	51.9077	97.7101	133.475	68.2767	145.497	113.598	57.8021	55.5226	60.044	55.9868	123.168	87.5751	85.1841
75.0980250067829_121.621316807941___7250	17.0907	0.0751286	0.0558956	12.4467	0.0579095	5.75269	0.0559893	4.94836	9.52895	6.40703	6.38288	21.102	13.7934	0.0549343	0.0509082	283.238	0.042614	0.0356921	0.0413265	3.28024	0.0396735	0.0423771	0.0454262	0.0395657	665.352	14.1355	5.71238	5.41866	885.907	0.0482588	702.091	757.46	567.394	593.639	242.365	0.0652299
75.1727067229126_400.682659444706___8	767.104	644.997	695.696	570.9	457.703	536.562	411.039	340.499	377.609	463.224	312.824	377.441	287.025	379.305	323.46	269.689	253.707	260.96	63.5929	75.2445	105.04	51.2712	147.111	61.0335	173.386	291.915	194.191	226.866	148.455	168.547	116.794	175.478	107.423	94.6159	66.198	71.7393
75.3849748549342_404.616824359522__[M+3H-CH4]3+ 239.171_66	431.359	363.397	353.901	442.619	348.414	350.55	257.78	276.829	277.011	391.866	221.037	269.045	369.852	284.96	225.984	267.405	139.17	243.129	22.7572	69.2257	78.6873	86.6733	84.8983	154.205	144.592	126.329	120.884	127.777	105.676	140.85	89.0323	96.3463	79.0423	85.4514	56.7301	78.0325
75.5960384366048_405.714920439879__[M+Na+K]2+ 89.2405_66	233.36	283.639	202.513	205.812	158.921	154.382	139.608	134.241	172.363	173.808	139.14	141.623	157.375	77.8136	143.939	154.731	51.0875	156.213	62.9337	48.8483	56.1165	32.2572	24.6563	47.4232	104.093	119.311	102.196	75.05	35.2256	47.2041	64.6604	72.1333	50.2685	81.8954	61.0806	56.7635
75.7033043499742_978.889135271502___3896	29.6904	81.7329	30.3611	36.991	69.196	74.3401	91.3591	44.2022	56.7955	88.8077	44.1631	31.3455	68.5712	24.2448	56.1014	49.6278	51.487	15.7453	22.7144	32.9919	55.6774	59.6597	59.0392	34.8104	285.044	334.226	247.787	194.603	136.208	236.613	18.8015	313.632	84.6758	47.6352	49.0318	136.387
75.7946065091039_413.435845066648__[M+Na+K]2+ 89.6357_38	214.892	222.783	239.658	58.1783	89.0216	125.796	80.2629	79.3676	127.543	109.153	95.4959	94.7032	50.5642	120.466	100.564	66.7961	88.8219	31.2201	27.1519	32.8497	34.7644	46.4262	44.6785	30.3754	85.1027	120.066	62.8582	91.9648	64.9899	63.3471	74.353	60.2736	33.734	76.5598	26.3431	35.6982
75.905623835059_979.937790734835___239	38.1768	73.7472	85.0948	16.442	62.9149	43.5218	48.7235	78.5952	18.9332	95.19	63.1032	47.0324	41.1901	71.7307	44.3117	27.6006	55.4642	34.9324	58.2469	22.8072	25.7094	50.4876	24.5967	38.6666	249.052	398.691	393.127	204.911	88.9588	242.96	56.4475	277.059	67.7334	89.4251	40.108	143.753
76.0121943152874_414.7339983396___38	181.278	41.5304	176.511	66.7361	57.4195	57.9437	18.3662	84.5417	67.0352	38.6566	38.4632	100.719	64.589	12.0881	61.6741	27.9314	60.9893	39.1644	9.08473	49.4649	52.3252	27.9199	34.8666	34.8386	26.2829	28.3535	28.6704	81.4447	59.2952	42.3751	60.6305	45.3719	16.9296	23.6368	26.4358	35.8289
76.0073113871537_332.074478633826___3351	12.77	24.7474	12.2464	12.4222	25.3603	5.75123	0.0559893	0.0451426	23.7756	0.0583543	19.1554	10.5342	22.9251	0.0549343	5.56483	11.0919	4.65391	11.6546	18.0058	3.26842	12.9869	0.0423771	0.0454262	12.9776	19.5496	28.1527	34.1475	5.39461	5.88407	0.0482588	9.26137	20.0029	5.59436	35.1645	21.8775	42.6742
76.1158219071073_978.546367457231___3897	33.9632	32.768	60.8596	24.6939	110.112	28.6232	79.2733	59.017	37.9087	105.892	25.2618	47.0828	27.4627	54.6504	28.1031	38.6456	37.5116	54.4096	26.9155	23.1355	34.3073	55.1339	44.3331	39.2319	214.751	290.879	281.685	137.931	129.945	132.322	51.4883	212.166	96.0904	53.6695	40.1693	115.031
76.2145172451636_414.590050673486___38	219.558	215.343	155.244	79.3645	51.1872	23.2366	55.197	49.8658	62.4278	58.1456	25.7162	42.5317	50.8819	36.365	28.1123	5.60135	14.1144	39.2696	36.4447	26.4194	34.978	37.273	19.9773	30.5671	39.5338	28.4305	45.999	49.0076	47.565	53.1133	32.7431	44.9292	52.7639	23.7061	17.6783	21.5566
76.4169606411642_405.319873023014___66	163.472	179.847	226.278	201.688	112.221	254.673	147.993	151.285	156.559	159.674	114.976	161.21	128.227	125.882	88.9146	121.762	69.7402	54.3592	22.5038	48.9511	60.4929	41.5142	39.4981	34.5251	105.786	70.2542	63.5209	91.443	52.894	73.5035	73.9729	74.9734	22.3648	40.9477	52.3548	63.925
76.5229971844073_405.25007525238___66	336.949	339.397	354.134	136.542	263.029	211.354	196.015	243.81	109.375	223.878	133.108	187.864	91.0431	219.567	166.715	116.253	106.935	73.8982	17.9986	16.3356	30.2465	9.22557	44.4248	51.7876	78.1517	49.1779	45.4667	105.87	78.8155	110.846	32.3632	44.9841	50.3208	35.1412	21.841	21.3083
76.5781960879906_1105.28509251854___84	59.5161	84.188	30.6493	36.7333	76.4745	180.218	107.303	44.464	71.1058	103.19	90.4869	125.659	64.5216	23.8658	44.2835	22.2265	37.0656	35.2034	54.0021	35.6098	21.6794	74.9706	45.1053	38.8049	117.092	112.897	34.0759	128.838	58.9718	145.954	50.8775	132.222	105.301	143.187	132.478	252.518
76.6259115154738_398.626496381471__[M+2H-H20]2+ 169.257_8	209.418	277.739	239.776	331.627	188.683	242.606	219.71	152.03	211.185	207.572	213.173	244.007	217.364	169.722	184.05	106.406	150.28	62.8584	54.5095	33.0038	48.1158	28.0106	14.961	61.12	72.4441	78.2015	120.745	108.963	77.3057	90.3181	60.803	60.652	28.2692	94.7667	53.0196	28.7428
76.7352299467127_405.674039844604___66	256.131	240.727	232.104	159.715	123.153	149.294	152.444	198.835	188.423	195.155	117.229	176.384	82.2953	120.465	77.8003	72.0439	55.7922	89.81	27.0335	26.137	64.8138	27.7062	44.4248	43.1564	64.4488	70.2542	56.8334	107.58	52.894	125.46	44.6519	44.9841	27.956	40.9981	21.841	42.6167
76.777723405036_1104.89475500057___84	25.5422	75.921	49.1045	20.6803	82.9596	92.6218	82.8443	69.2594	96.392	142.971	152.469	47.238	63.6885	11.9149	38.8006	50.0086	27.8374	42.4722	22.5009	29.1741	39.0229	32.3784	34.6132	64.7799	91.2603	193.055	57.6584	75.0293	142.466	69.7471	75.1082	104.446	170.953	178.94	149.055	144.371
76.8266642729429_413.139899209637___38	85.9724	209.941	197.211	82.5106	134.363	245.367	200.679	121.968	67.2602	64.6058	153.179	132.911	318.76	196.064	238.105	216.566	413.474	60.2859	194.731	61.6606	168.113	46.6557	129.915	71.3295	157.315	198.172	129.888	292.79	173.052	265.726	188.458	146.191	165.771	142.035	97.224	204.723
76.9357292509748_1124.4755424234___6220	243.49	184.094	366.379	318.146	237.629	276.812	239.523	194.216	232.778	235.443	283.456	216.03	291.768	470.266	277.697	332.326	215.278	289.48	254.542	239.405	241.742	318.516	204.407	323.15	265.397	302.74	237.519	292.463	263.607	220.044	510.542	217.167	236.248	504.354	576.122	262.785
76.9267519437284_122.790874780587___7251	21.2535	16.3991	6.08425	8.25477	12.6095	22.9107	12.2306	4.92156	9.45575	0.0583543	12.7034	0.0480593	0.0419457	0.0549343	0.0509082	0.0508358	0.042614	0.0356921	0.0413265	0.0299218	0.0396735	239.138	0.0454262	0.0395657	0.0597342	0.0645454	0.0522024	336.313	0.0539793	0.0482588	0.0425389	0.0459168	0.0513705	0.0539001	0.0402583	0.0652299
76.9440770396776_414.110815186263___38	160.805	121.151	128.74	86.9075	82.4201	69.066	61.4734	130.09	118.605	51.2105	57.2691	157.725	517.352	659.729	525.41	858.359	749.595	618.677	304.572	318.322	303.557	232.009	264.304	297.364	355.494	289.62	402.616	711.009	698.912	503.772	375.45	339.421	414.857	329.908	370.71	238.759
77.0327773161226_126.268243716296___5726	0.0389307	0.0751286	0.0558956	0.0378092	0.0579095	0.0525653	0.0559893	0.0451426	0.0434681	0.0583543	0.058061	0.0480593	0.0419457	16184	0.0509082	283.238	11375.6	0.0356921	0.0413265	0.0299218	0.0396735	2560.1	0.0454262	0.0395657	3237.7	7707.72	282.768	0.049469	3790.14	2962.02	0.0425389	2987.02	4969.46	0.0539001	440.663	6384.68
77.1337836936666_151.955113028362___5943	47.051	74.4353	79.8157	45.6534	12.7212	74.8851	36.9874	34.7027	57.2127	57.7737	38.3967	31.7023	82.5923	60.046	312.34	0.0508358	46.5477	73.9765	13.5288	78.5611	86.5416	41.6059	89.2011	64.403	52.3562	77.7539	68.5949	65.0172	53.1726	52.7925	106.969	110.466	50.6189	53.0601	110.039	57.0916
77.1459563830852_414.195113599774___38	76.6606	115.554	91.957	70.3537	107.78	51.7995	55.326	59.2856	76.1577	115.084	70.0805	52.6082	122.157	524.647	303.7	608.784	443.666	163.6	305.301	255.311	286.929	107.859	273.123	261.38	244.521	344.895	254.188	469.284	485.725	440.052	313.287	291.452	278.126	321.392	209.666	207.983
77.1666813473217_988.395154808279___2353	81.2652	156.056	103.47	61.823	82.005	86.0298	49.2244	63.9797	115.538	89.1333	82.3495	41.9095	292.913	151.726	194.642	97.6449	127.91	97.9485	227.708	73.2771	126.32	127.451	124.923	255.659	79.3613	156.472	120.669	108.854	88.8551	90.2432	74.9789	111.303	124.767	77.3695	62.3082	93.2485
77.262004718206_411.717782017309___6920	157.811	83.4246	122.038	177.841	38.4487	142.265	43.4973	124.219	62.5515	103.702	70.826	96.0236	437.824	572.256	355.119	418.874	98.9839	483.649	72.9999	171.752	180.097	167.189	170.422	182.222	131.876	163.756	311.8	349.29	163.123	202.675	205.645	270.541	102.019	244.368	179.379	198.835
77.2593241471398_131.386597375094___5727	17.1239	8.26874	18.3961	4.14752	12.7189	17.3172	6.15542	24.7405	19.0695	38.4689	31.9505	26.3982	238.348	306.15	0.0509082	287.39	231.883	0.0356921	0.0413265	3.27727	0.0396735	240.688	0.0454262	34.6959	343.062	352.423	581.116	5.41645	17.7527	21.1547	23.2863	5.03013	11.2579	23.6137	4.40864	14.2817
77.3213471509038_130.677575862847___125	17.1591	49.778	24.6075	37.4574	31.8478	34.7546	49.3078	49.6743	14.3503	32.1691	19.2002	21.1919	13.8068	0.0549343	295.608	0.0508358	0.042614	0.0356921	0.0413265	180.008	444.909	13.718	257.904	38.4876	45.8809	35.4312	314.935	10.8505	325.523	20.8616	22.9622	255.831	28.1914	23.2849	43.4741	21.4574
77.4645202459744_410.4322766279___6912	175.649	124.592	141.898	139.014	127.474	167.924	111.373	166.505	148.554	115.825	83.3667	142.976	226.999	190.467	296.551	418.178	198.328	403.882	179.201	216.185	176.766	152.882	211.506	208.385	176.563	195.924	148.904	275.002	219.12	210.276	177.522	122.831	135.236	70.8134	140.821	84.8435
77.4793289472344_129.572611875889___125	29.9716	57.958	73.8225	16.6171	38.2847	52.0331	24.6539	24.7858	4.77448	38.5287	19.2002	37.0148	0.0419457	324.091	0.0509082	0.0508358	270.222	0.0356921	0.0413265	171.287	225.07	259.388	0.0454262	0.0395657	373.016	20.9258	606.12	32.0412	11.6694	269.129	0.0425389	0.0459168	11.1032	0.0539001	0.0402583	35.2223
77.4884926932199_1199.05569547887___8352	0.0389307	0.0751286	0.0558956	0.0378092	0.0579095	0.0525653	0.0559893	0.0451426	0.0434681	0.0583543	0.058061	0.0480593	23.2953	6.10575	11.2539	16.9395	0.042614	0.0356921	4.59685	9.97709	4.40326	9.40665	25.2087	8.74647	19.7805	7.12942	0.0522024	0.049469	0.0539793	0.0482588	0.0425389	0.0459168	0.0513705	11.9832	21.3304	0.0652299
77.5800439387212_131.360614624697___125	17.1266	8.29633	18.4247	16.6171	31.8478	11.5849	43.1444	0.0451426	14.3503	19.2643	12.8002	21.1513	231.169	0.0549343	0.0509082	0.0508358	0.042614	0.0356921	0.0413265	3.28294	0.0396735	0.0423771	0.0454262	29.9348	26.2177	21.2587	11.4522	16.2757	17.7829	5.29799	0.0425389	19.8395	5.63828	34.9274	0.0402583	21.4574
77.6535840120766_128.554279439541___125	33.7828	33.3252	37.0708	4.09834	25.6299	29.0856	24.7962	24.4582	19.2131	12.9184	32.1894	26.5943	0.0419457	352.477	295.608	301.793	0.042614	207.863	261.671	173.7	0.0396735	0.0423771	0.0454262	51.4319	32.2877	351.596	45.6025	16.0602	17.5489	20.9111	23.0162	260.246	27.8222	378.216	21.7964	380.914
77.676068658188_414.630214386824___38	440.752	286.86	415.325	137.024	138.963	114.719	61.3448	88.7203	94.8381	95.796	101.701	68.2997	101.945	152.098	123.885	163.596	234.2	110.148	77.5813	117.271	83.2009	88.7788	95.0786	85.8721	178.181	117.157	63.3576	130.912	101.235	101.072	120.818	155.301	90.6893	78.2758	106.947	86.379
77.6660361986567_399.730683506894__[M+2Na]2+ 109.361_8	81.5765	216.54	307.304	100.09	153.64	87.1392	111.496	124.357	100.939	122.725	128.683	111.602	268.305	139.416	232.678	260.462	206.944	227.128	116.197	170.947	132.124	111.864	144.824	78.5835	184.417	220.337	120.745	163.265	112.986	153.974	126.899	106.138	113.077	47.3732	124.067	86.2283
77.7157758076986_1199.70593319483___8353	0.0389307	0.0751286	0.0558956	0.0378092	0.0579095	0.0525653	0.0559893	0.0451426	0.0434681	0.0583543	0.058061	0.0480593	35.5869	23.2718	5.40651	0.0508358	13.577	3.79064	17.5308	13.2793	4.20843	13.5019	9.63495	12.6061	0.0597342	0.0645454	0.0522024	0.049469	0.0539793	10.2509	0.0425389	0.0459168	0.0513705	0.0539001	0.0402583	0.0652299
77.7843780517578_126.41017648466___5728	21.1142	33.4082	36.383	24.59	12.5749	11.4207	12.4289	14.6749	23.582	12.6796	25.8149	31.323	0.0419457	0.0549343	0.0509082	0.0508358	0.042614	0.0356921	0.0413265	354.17	236.475	236.059	258.468	25.7505	6.47312	370.841	311.045	21.4494	313.021	10.4704	0.0425389	9.95675	33.4317	338.291	246.697	383.014
77.8857066739307_399.279999385708__[M+Na]+ 54.8949_8	741.448	751.348	721.733	499.933	420.151	412.1	321.621	390.484	336.732	351.989	341.201	319.471	280.305	542.939	848.535	780.959	538.82	421.369	350.217	635.347	474.81	361.934	426.957	442.675	281.237	278.961	318.628	405.803	302.025	250.975	391.323	298.666	215.304	333.813	160.615	150.9
77.8800805229906_121.750995294943___7252	29.8261	8.23355	30.4776	12.4172	12.6699	5.75269	6.12819	9.86998	4.75166	6.38699	6.36606	5.25868	0.0419457	0.0549343	0.0509082	0.0508358	0.042614	208.852	0.0413265	6.54129	0.0396735	0.0423771	0.0454262	0.0395657	671.875	379.724	290.558	5.40346	17.7181	288.028	0.0425389	270.256	0.0513705	0.0539001	0.0402583	0.0652299
77.9184223594724_123.218239132621___7253	17.0028	16.4291	24.4395	16.5095	6.33495	11.506	12.2306	4.92156	4.73877	19.1168	12.7034	20.9885	0.0419457	303.071	0.0509082	0.0508358	0.042614	0.0356921	0.0413265	490.786	0.0396735	0.0423771	1241.76	0.0395657	19.5241	21.0964	22.7879	275.646	11.8121	0.0482588	474.26	0.0459168	578.63	11.7812	0.0402583	21.3756
78.0020144431435_1120.03986752439___4674	55.116	174.528	134.555	86.452	127.155	103.798	147.155	78.8372	99.2985	134.254	140.45	78.3692	167.513	245.798	249.403	237.282	129.589	192.839	143.92	156.007	189.911	144.037	250.631	210.968	155.515	84.2922	162.233	155.856	135.048	94.7897	124.413	129.337	94.6832	152.618	187.8	162.892
78.0375999917672_127.024921638526___125	409.795	510.75	377.996	399.875	346.003	293.998	303.104	313.546	361.949	341.853	374.8	347.181	2756.04	1798.11	0.0509082	2024.24	1457.01	1493.9	0.0413265	163.595	0.0396735	262.519	1201.32	761.894	359.928	337.485	790.77	827.941	679.042	989.628	1048.67	257.285	583.064	580.754	0.0402583	391.038
78.0289421081542_1200.09219721761___8374	0.0389307	0.0751286	0.0558956	0.0378092	0.0579095	0.0525653	0.0559893	0.0451426	0.0434681	0.0583543	0.058061	0.0480593	17.8062	5.8291	32.442	0.0508358	9.54418	11.3544	13.1658	0.0299218	16.8304	0.0423771	556.126	13.2032	0.0597342	35.3743	0.0522024	0.049469	0.0539793	0.0482588	0.0425389	0.0459168	0.0513705	0.0539001	0.0402583	0.0652299
78.0881391787114_121.150294597898___8312	8.54537	16.5127	12.2564	8.29777	0.0579095	11.5374	0.0559893	9.89672	14.2934	6.40703	25.5315	10.551	0.0419457	0.0549343	0.0509082	0.0508358	0.042614	0.0356921	0.0413265	0.0299218	0.0396735	0.0423771	0.0454262	0.0395657	0.0597342	0.0645454	860.279	286.456	0.0539793	0.0482588	0.0425389	0.0459168	578.63	0.0539001	0.0402583	0.0652299
78.1027212000325_399.247822318328__[M+Na]+ 55.1206_8	492.967	600.855	550.439	469.367	409.389	423.231	365.198	359.257	417.795	264.955	303.635	453.975	752.282	445.816	854.386	621.968	394.999	703.624	399.372	576.597	489.392	375.253	422.569	339.069	370.44	351.111	478.774	222.853	402.584	286.397	283.478	242.984	219.413	381.419	220.57	144.611
78.1806982059331_121.764791023972___7254	8.52175	0.0751286	24.5174	16.5563	25.3398	0.0525653	12.2564	0.0451426	23.8276	0.0583543	25.4643	5.25868	4.58424	0.0549343	0.0509082	0.0508358	0.042614	225.785	237.781	3.27064	0.0396735	0.0423771	0.0454262	13.0176	658.829	7.04803	11.394	270.241	11.8121	0.0482588	246.429	511.662	5.63385	23.6295	246.165	1076.06
78.2784881591797_123.645105747166___7255	4.25071	8.2358	12.2197	0.0378092	6.32043	5.75302	6.11528	9.84313	9.5004	12.7445	6.3517	5.24711	4.57329	324.159	289.617	0.0508358	232.345	0.0356921	0.0413265	163.12	0.0396735	248.455	245.223	12.9804	0.0597342	7.03212	0.0522024	0.049469	0.0539793	538.258	4.6485	265.251	11.2027	589.142	0.0402583	0.0652299
78.3053495347416_399.092122103326__[M+Na]+ 55.3103 [M+3H]3+ 231.897 [M+3H-CO2]3+ 275.893_8	431.671	357.881	433.727	383.292	346.189	351.205	356.42	240.799	298.522	270.487	309.834	359.474	460.355	413.936	449.931	557.356	350.454	463.832	192.037	397.991	266.391	216.151	398.467	281.044	262.636	209.482	224.763	331.44	176.656	224.78	242.883	227.458	174.943	177.435	113.843	105.024
78.507311551048_124.866296838711___5729	8.48482	0.0751286	18.257	8.23499	25.2346	11.457	6.10437	14.7373	9.45756	12.7214	6.34274	10.4707	242.405	0.0549343	0.0509082	0.0508358	0.042614	0.0356921	0.0413265	0.0299218	228.177	0.0423771	0.0454262	17.2294	352.873	710.84	296.255	0.049469	295.302	5.25333	0.0425389	255.831	0.0513705	0.0539001	240.64	7.0915
78.5210549574807_399.88482668483___8	751.976	726.791	776.967	727.115	482.828	447.193	465.077	494.475	468.059	470.02	412.065	634.772	525.784	440.243	429.223	350.611	293.721	483.723	136.348	211.399	266.465	182.384	163.246	269.668	260.768	279.941	221.057	295.135	242.562	253.793	198.374	193.914	113.077	160.16	80.0667	86.2284
78.5821857457669_1198.95571439724___8354	0.0389307	8.35139	0.0558956	0.0378092	0.0579095	0.0525653	0.0559893	0.0451426	0.0434681	0.0583543	6.45826	0.0480593	22.2607	12.2115	5.65826	0.0508358	4.73639	3.96184	0.0413265	0.0299218	0.0396735	9.40665	5.04174	4.37324	26.3739	7.07487	17.2247	0.049469	11.9178	5.36443	18.8097	0.0459168	5.67097	35.9496	4.26608	0.0652299
78.6271717091717_121.762498256573___7256	4.27269	0.0751286	0.0558956	0.0378092	6.35294	5.75269	0.0559893	0.0451426	0.0434681	0.0583543	0.058061	0.0480593	0.0419457	0.0549343	0.0509082	292.601	0.042614	210.683	0.0413265	3.28024	0.0396735	240.799	0.0454262	0.0395657	332.676	366.52	569.722	0.049469	11.8465	274.406	241.78	0.0459168	0.0513705	0.0539001	0.0402583	363.437
78.7333659580198_402.120768003063___8	514.707	542.808	457.793	446.247	351.567	311.52	271.786	331.844	279.216	285.142	321.996	347.539	339.562	308.162	358.813	304.445	296.621	324.339	222	143.459	141.724	134.72	134.983	180.136	194.793	246.054	208.973	157.408	152.456	175.622	192.49	148.004	143.29	118.139	136.486	128.961
78.9354012299585_399.040359900655__[M+3H-C6H10O4]3+ 379.843_8	285.699	450.914	509.162	204.149	440.038	396.484	360.441	323.494	408.08	608.691	499.83	559.818	246.213	353.103	332.449	498.621	420.136	321.906	210.066	373.953	248.15	154.978	342.587	144.853	656.503	583.682	599.942	356.376	393.279	478.979	359.665	416.238	415.257	435.548	249.234	289.678
78.9992664983096_1184.9993181559___7966	2361.26	1203.31	1134.16	1736.47	850.8	833.566	878.816	1119.8	1094.62	1128.58	965.525	1346.43	1031.21	866.772	1013.01	1014.41	796.274	873.573	285.872	1058.28	738.638	857.946	868.061	878.409	3063.38	3319.42	3585.15	2640.75	2601.95	2570.54	4170.22	2985.35	2682.96	4661.01	4195.14	3549.83
79.0156228762522_124.349336528248___7245	2100.26	1764.9	1690.48	2090.86	1331.52	1364.14	1445.3	143.072	137.983	1579.08	1393.85	1997.4	13619.5	13609.1	7238.39	16748.7	14048.3	11337.6	1356.79	26811.6	13656.8	8747.63	25819.4	13033.3	5491.61	3201.39	2192.97	2650.24	2871.6	2150.05	0.0425389	0.0459168	876.649	2399.83	2234.89	952.421
79.0235238984049_1201.0816125977___8388	0.0389307	0.0751286	0.0558956	0.0378092	0.0579095	0.0525653	0.0559893	0.0451426	0.0434681	0.0583543	0.058061	0.0480593	1822.59	2022.26	1347.64	2050.7	872.428	1354.1	1267.74	1434.98	1468.33	1540.3	1961.56	1245.28	0.0597342	0.0645454	0.0522024	0.049469	0.0539793	0.0482588	0.0425389	0.0459168	0.0513705	0.0539001	0.0402583	0.0652299
79.0566030889863_927.23128038556__[M+H-CH4]+ 94.08_7	3021.22	3774.37	2552.25	2412.4	2704.39	2595.41	2533.78	2526.98	2361.77	3116.82	2420.42	2752.39	2260.77	2171.61	1899.69	1878.29	1729.34	1633.63	1751.85	1455.01	2331.07	2139.09	2414.25	2050.45	3607.75	3974.03	3872.84	3184.16	3082.48	2649.44	2798.07	2978.37	2237.37	4754.92	3379.17	3703.87
79.0566626858042_982.83201526246__[M+2Na]2+ 112.128_1	3103.32	3859.08	3454.38	3190.7	3091.34	2898.5	2894.11	3096.62	2626.08	3404	3189.67	3224.69	2455.27	2434.11	2027.45	2650.83	2108.42	2253.78	2074.49	1809.29	2542.37	2572.76	2936.84	2133.65	3148.03	3515.92	3243.56	3274.57	2667.38	2421.78	3133.23	2714.72	2547.71	4030.39	3363.15	2927.99
79.0566048101281_885.509627919544___112	1958.75	2129.36	1460.31	1618.87	1796.41	1624.48	1437.56	1788.1	1565.96	2150.04	1691.44	1876.12	1325.64	1022.22	940.999	1182.34	812.918	929.885	1090.19	985.825	1344.02	1140.15	1469.78	1270.8	2685.16	3042.93	2530.56	2338.63	2041.54	1515.55	2170.3	2016.15	1379.35	3226.16	2689.2	3052.32
79.0563600087103_357.567691217208__[M+H-C2H4]+ 106.08_69	230.544	1395.85	335.448	193.261	143.067	161.397	209.213	200.619	144.988	211.694	255.017	244.85	303.317	192.011	258.903	1372.42	287.9	174.233	194.032	223.264	219.352	238.363	296.127	241.389	2542.45	3616.46	353.532	1494.68	221.053	1713.36	585.491	222.965	255.169	2692.28	909.422	430.563
79.056146181276_618.429614532032___22	475.404	646.343	515.454	502.2	495.775	468.966	480.832	345.719	360.056	475.513	385.012	474.938	711.511	634.54	648.716	936.931	480.909	542.7	507.073	634.101	492.673	676.485	709.467	579.664	844.854	875.955	510.617	767.008	467.838	619.756	544.445	354.584	456.307	912.944	556.479	472.486
79.0566221490275_799.290517592822___39	1021	3198.21	1848.51	644.019	522.619	610.022	284.358	354.569	407.161	407.952	423.484	390.397	522.253	462.955	517.694	3328.13	253.398	363.527	315.354	391.992	329.357	430.287	453.652	340.341	2350.58	2835.73	1348.09	1532.65	710.06	2244.66	2515.55	596.586	433.59	2619.06	968.172	636.06
79.0566946647382_309.511459247654___104	852.568	1046.06	847.353	218.222	202.938	165.756	126.52	200.223	164.141	134.322	197.911	142.166	652.859	550.523	553.471	455.828	248.295	173.067	172.531	170.191	198.423	170.119	178.069	168.681	1188.7	1559.25	860.636	356.233	294.781	471	296.796	209.973	212.645	549.596	274.259	248.821
79.1482314578714_399.084145602859__[M+H]+ 78.1467 [M+3H-C6H10O4]3+ 380.488_8	458.808	533.358	552.15	426.642	419.109	389.42	387.131	339.963	342.037	441.743	423.262	341.721	348.421	323.115	324.867	340.659	333.735	261.68	227.804	283.139	203.587	166.153	232.051	196.658	429.556	424.726	437.959	416.426	557.478	410.93	415.814	328.889	162.799	308.722	290.201	336.025
79.1770782470703_122.933023813005___7257	12.7521	0.0751286	6.09646	12.3822	18.9613	17.219	0.0559893	0.0451426	14.2123	25.4891	0.058061	15.7413	256.104	0.0549343	0.0509082	0.0508358	0.042614	0.0356921	250.021	333.734	250.531	0.0423771	282.874	74.2012	6.50802	14.0642	17.0525	10.7808	17.6738	273.738	0.0425389	0.0459168	0.0513705	11.7533	0.0402583	7.1053
79.2294554583627_123.036035573526___7258	4.25071	0.0751286	0.0558956	12.3822	12.6699	5.73892	6.12819	4.92156	0.0434681	6.37226	12.7321	0.0480593	507.565	0.0549343	320.085	570.711	0.042614	0.0356921	0.0413265	6.54129	0.0396735	248.739	0.0454262	0.0395657	339.199	358.628	307.65	0.049469	17.7181	274.406	248.785	0.0459168	22.4597	0.0539001	0.0402583	14.2504
79.355485079929_398.760001319007___8	537.601	260.654	496.056	249.72	326.467	332.61	339.084	349.449	343.826	400.616	379.65	354.714	269.278	317.571	226.874	398.453	347.045	362.096	221.897	343.801	374.064	318.78	460.982	268.637	626.964	451.616	646.724	603.361	640.33	441.128	394.778	362.759	374.131	383.948	338.629	324.307
79.5718812984936_398.495350878607___8	513.968	108.629	282.308	273.137	272.797	243.891	231.867	231.86	222.619	337.401	238.302	251.554	249.509	215.423	236.165	187.417	179.556	243.574	234.071	237.472	226.964	214.965	229.119	202.702	398.672	362.87	449.449	499.792	415.46	385.476	430.049	338.955	274.122	264.714	294.577	292.933
79.6575188376586_122.499281227251___7259	8.52175	8.21454	18.2866	4.13908	6.31673	5.73892	24.5128	9.86998	14.2163	0.0583543	6.36606	5.25868	0.0419457	0.0549343	0.0509082	0.0508358	0.042614	0.0356921	0.0413265	332.941	0.0396735	253.825	0.0454262	0.0395657	351.419	7.04803	0.0522024	284.32	304.711	0.0482588	0.0425389	0.0459168	0.0513705	0.0539001	0.0402583	0.0652299
79.7298001054854_141.136578765496___7538	4.26771	0.0751286	24.4593	33.1416	0.0579095	23.0251	6.15284	24.7176	23.787	19.2189	12.7796	10.5462	36.6709	23.9965	5.56304	299.683	251.275	217.613	31.5759	26.1593	56.3692	13.8678	24.7254	21.6177	32.6693	56.5271	22.9216	21.6324	11.807	10.5432	18.5547	5.01537	16.8266	47.0567	21.9558	21.3815
79.7827799005516_398.721051114514___8	171.474	114.873	192.265	272.639	141.355	128.274	118.213	163.95	191.281	160.026	145.82	101.739	180.844	180.685	100.16	177.635	121.033	152.155	134.897	81.2004	116.547	104.059	90.3126	77.8588	256.129	166.777	323.173	239.926	281.87	167.435	212.634	197.5	156.813	169.042	202.463	92.5568
79.7825764674701_122.933023813005___7260	4.25071	16.4716	12.2197	16.5095	0.0579095	11.506	12.2306	0.0451426	0.0434681	12.7445	12.7321	10.4942	13.7527	0.0549343	304.246	0.0508358	0.042614	0.0356921	0.0413265	19.6239	0.0396735	235.365	500.929	97.9237	13.0454	21.1441	0.0522024	32.4208	17.7181	10.5541	9.297	5.01505	5.61493	324.028	8.81251	719.505
79.8597882530917_123.141041640402___7261	4.25071	0.0751286	6.09552	16.5095	12.6699	17.2168	0.0559893	9.84313	14.2163	6.37226	12.7321	10.4942	9.16847	0.0549343	0.0509082	306.825	236.992	399.573	0.0413265	330.462	233.726	0.0423771	0.0454262	0.0395657	32.6135	379.724	17.091	10.8069	11.8121	0.0482588	0.0425389	0.0459168	22.4597	0.0539001	0.0402583	356.31
80.002586422219_398.282400676366__[M+3H]3+ 236.986_8	98.4277	75.3435	105.436	205.507	90.116	93.4604	93.3262	50.0051	210.301	442.456	170.77	232.787	94.8416	53.986	100.161	104.706	46.5426	62.2113	54.0018	130.462	95.0856	73.9262	128.099	125.441	247.524	157.121	246.223	166.692	64.7312	180.804	227.156	177.921	115.956	122.366	101.779	97.0464
80.0517965089623_1106.66835415092__[M+3H-C2H4]3+ 265.164_84	8261.75	9312.3	7517.2	7565.97	7597.74	7012.89	7085.46	6499.63	6258.46	8116.47	6901.51	7807.94	557.005	624.239	539.331	653.954	538.09	421.202	641.779	363.5	481.422	628.946	632.12	462.301	2764.96	1363.62	1147.9	1340.26	1772.03	1580.62	1894.91	1338.81	1203.51	932.979	1448.19	1885.33
80.02134030387_123.14868906475___7262	80.7635	57.6506	61.0987	66.0381	63.3495	92.0483	48.9223	78.745	61.7526	19.1168	25.4068	57.7183	351.65	0.0549343	0.0509082	205.013	277.785	418.97	0.0413265	683.828	317.967	325.633	815.391	548.849	418.825	84.3854	73.8941	48.5134	64.8039	31.6622	282.961	265.864	33.6896	88.359	0.0402583	750.603
80.027099609375_1200.60267118567___8392	0.0389307	0.0751286	0.0558956	0.0378092	0.0579095	0.0525653	0.0559893	0.0451426	0.0434681	0.0583543	0.058061	0.0480593	62.3218	46.6328	57.0081	59.3924	62.0371	60.3774	48.2746	39.9084	56.3488	49.4638	84.6536	57.6421	0.0597342	0.0645454	0.0522024	0.049469	0.0539793	0.0482588	46.2534	24.3448	0.0513705	0.0539001	0.0402583	41.4561
80.0600471514785_982.893223970957___1	112.084	565.365	361.164	274.612	240.981	170.583	169.098	271.2	230.289	244.648	333.446	248.861	486.452	205.526	232.305	256.36	175.627	154.021	170.29	173.405	229.299	188.203	209.504	297.927	341.407	219.739	303.026	212.726	178.933	201.37	304.239	204.4	286.357	359.71	224.71	271.801
80.0605306946358_926.871244660957___459	71.4714	114.212	476.791	192.261	260.502	263.762	24.3759	120.332	65.3352	275.531	126.357	138.46	545.466	237.033	131.702	214.308	191.917	182.661	145.542	101.097	252.89	271.042	265.893	228.533	306.253	448.42	474.151	218.301	333.077	280.438	396.901	263.76	331.084	495.727	262.297	421.122
80.2043500408394_399.829421375392___8	125.258	167.119	99.2529	328.523	251.659	211.346	265.107	223.26	209.943	586.499	205.912	325.883	377.943	405.516	362.293	186.656	151.052	158.183	40.5019	58.7285	51.9286	73.9242	123.808	86.4081	234.76	293.868	217.758	209.813	84.4418	229.89	169.447	242.057	177.491	108.667	122.268	100.755
80.4162725504235_400.529861479056__[2M+2Na+K]3+ 78.1467_8	53.616	133.693	86.8457	247.05	197.882	157.426	170.576	168.355	182.495	228.222	114.608	172.687	246.317	225.369	250.919	108.15	93.6399	97.972	59.3265	78.6195	26.2794	46.8526	80.0248	65.5898	144.774	113.922	166.06	65.4075	142.937	122.587	70.2679	105.395	86.2193	71.182	57.5371	50.4619
80.6366377280456_400.924962614744__[M+H-C5H8O4]+ 211.67_8	628.199	1956.22	1894.61	673.242	570.188	866.247	209.656	370.874	379.763	270.55	233.059	303.132	92.029	167.818	151.302	99.8989	122.797	78.1229	49.7928	63.4214	47.8445	46.4372	59.6207	78.1832	462.247	433.567	424.115	169.532	123.583	142.134	23.2676	60.3383	90.0001	99.7519	30.77	42.8842
80.8560078935575_398.87531178329__[M+K]+ 41.8877 [M+H+NH3]+ 62.8182_8	1062.84	692.528	739.266	207.56	322.025	329.915	142.648	162.189	128.247	109.955	128.884	79.8518	101.346	78.4306	111.04	83.032	41.841	50.4915	35.9644	44.9943	56.2068	32.6797	29.6166	17.2614	319.356	432.146	334.205	147.1	95.2949	69.0667	74.9489	55.5975	33.9243	35.5908	57.5367	79.1647
80.8538192362166_414.729069346737__[M+H]+ 79.8485 [M+3H-COCH2]3+ 281.541_38	771.416	1714.05	1337.68	631.035	479.489	549.646	233.727	249.878	270.856	89.9849	191.544	204.684	105.315	78.9289	123.188	72.5341	60.8396	46.9333	45.3689	55.7167	69.5881	41.8304	39.7558	26.0651	277.836	399.898	267.366	130.014	94.6493	52.8449	83.7361	50.2913	56.2955	64.8496	101.102	78.6367
81.0475114643755_1089.2595475693___33	9979.46	7861.14	8770.28	9005.49	7674.96	6316.05	7877.07	7664.19	7006.96	9197.85	8434.57	9324.2	154.145	83.374	121.209	195.555	106.408	106.068	85.1719	142.398	60.5234	142.833	113.982	91.407	1060.41	836.987	1907.09	1131.24	819.725	496.337	1279.3	2007.25	954.844	1250.04	1510.76	820.53
81.0275440818265_126.959069486844___125	213.405	163.631	200.924	229.507	252.346	205.572	247.962	150.488	192.931	249.563	225.013	330.726	796.138	2050.26	1180.78	0.0508358	0.042614	1673.85	2190.32	1207.54	826.051	1401.9	1061.38	795.201	220.102	752.415	241.58	613.108	233.985	519.194	952.538	932.092	248.608	1105.33	612.928	771.364
81.0197173166149_1200.65174411776__[2M+Na+2K]3+ 71.0749_236	0.0389307	0.0751286	0.0558956	0.0378092	0.0579095	0.0525653	0.0559893	0.0451426	0.0434681	0.0583543	0.058061	0.0480593	92.0611	81.4027	48.6618	47.5122	63.3633	56.8618	8.76755	115.594	76.8945	104.046	129.916	65.6441	0.0597342	54.7915	0.0522024	0.049469	0.0539793	56.3836	0.0425389	9.739	0.0513705	45.7451	0.0402583	115.214
81.035502352735_260.46907868245___123	2594.15	2393.49	2673.31	1335.16	1552.48	1290.2	949.124	2067.22	867.046	590.872	542.967	497.827	122.097	126.677	114.895	254.622	206.693	222.223	280.913	256.661	344.032	272.103	299.905	331.558	236.515	269.555	201.057	214.689	236.928	240.743	218.871	221.943	168.835	372.812	320.263	222.14
81.03561403132_331.023670425421__[M+H-H20]+ 98.0379_68	1161.83	1035.72	1258.77	832.643	917.092	932.246	559.238	698.261	714.278	438.954	384.727	482.672	367.465	224.485	351.717	270.674	215.47	192.45	130.892	138.961	134.982	134.381	238.885	172.467	240.838	381.037	194.529	214.937	193.09	254.032	283.813	268.668	273.815	436.089	326.466	356.537
81.0341748553883_170.660666253759___8320	257.055	150.257	264.032	486.32	266.394	273.533	287.67	412.476	329.868	487.561	399.6	774.479	268.018	286.603	355.877	1802.25	1672.56	713.167	945.451	870.944	969.708	322.564	514.557	598.465	332.074	442.658	310.732	502.27	350.86	1245.12	636.405	629.829	457.703	679.457	560.001	536.903
81.0355130056732_374.870534821656__[M+2H-C6H10O5]2+ 322.118_40	209.045	362.861	375.963	301.969	233.072	251.575	258.271	233.666	208.723	332.341	337.781	289.297	347.962	185.606	379.699	291.182	267.565	220.1	173.535	284.103	209.999	240.678	327.255	335.059	240.943	310.413	267.543	345.279	265.675	356.527	400.185	256.725	404.31	800.793	400.431	582.154
81.0356023600541_294.189984628765___7199	385.327	284.825	386.982	1029.17	927.863	961.764	2078.13	1048.98	1191.56	875.219	759.938	786.535	210.839	168.152	133.418	189.222	181.886	254.958	198.934	164.242	135.007	258.011	238.559	185.911	146.664	218.985	230.652	204.008	171.291	283.775	249.906	315.842	258.322	323.918	282.367	356.634
81.0344837074408_453.832141861878___7892	311.066	327.545	219.5	217.862	237.645	149.324	174.392	150.156	211.29	278.945	194.076	251.362	209.256	236.288	265.275	241.46	102.322	123.532	198.459	137.376	175.57	202.953	301.625	240.599	220.643	218.026	273.894	226.319	135.368	219.37	292.439	305.012	188.119	721.759	381.599	525.288
81.0720934405962_926.854364012986_[3][M]+_[M+H-CH2]+ 94.08 [M+H-C2H4]+ 108.094_7	30657	35051.1	25824.5	23891	25876.9	23499.9	22520.5	24139.4	21955	29862.1	24885	25193.1	21878.5	20460.3	17051.4	16192.5	15223.5	14196	14889.9	14010.5	20980.5	20137.1	21189.8	18543.7	36024.7	40078.6	35004.7	30540.1	29180.3	24666.8	26636.8	28887.5	22277.2	42896.8	33460.8	33723.2
81.0721324557025_982.651795867996__[2M+3H]3+ 120.098_1	31033.8	34434.6	27895.3	27310.8	26718.7	24666.8	23654.6	24953.1	23582.9	30274.9	26413.3	27742	20631.1	18656.8	16034.6	20449	16319.9	17404	17149.3	15972.9	19263.2	19062.5	21199.7	17865.2	24780.3	27402.3	24930.2	23071.1	21829.7	18867.9	24339.7	21983.2	19637.4	30399.2	26840.7	25779.7
81.0721631232989_885.337319605634_[4][M]+__112	13326.5	11641.8	9256.64	9582.7	11861.8	9680.54	10088.1	11061.9	10290.4	12975	11605.8	11619.3	5421.71	4890.78	4835.76	6084.44	4480.27	4663	4394.97	4598.83	5885.42	5144.82	7227.56	4665.97	12863.6	15318.9	15219	11843	12474	9236.13	10446.1	13726.7	8025.67	19369.7	12673	17550.7
81.0723060075762_619.500483083734___22	3150.25	4226.16	2989.65	3857.44	4087.16	3789.93	3055.5	2771.01	2677.13	2958.62	3053.33	3771.49	4797.89	4491.28	3987.04	5248.59	3240.52	3601.92	3220.74	4113.19	3060.32	3787.47	4063.09	3905.94	3801.81	4468.19	3063.2	2992.94	2566.81	407.504	2865.15	2023.96	2229.84	4333.44	3061.74	2960.95
81.0722622705672_1058.4972734335___9	6336.67	9991.43	6426.1	5573.06	6323.49	6159.52	5909.75	5806.2	5581.86	7035.09	6528.07	6580.94	10190.2	14143.1	11482	14321.6	11705.7	9861.98	10730.8	9835.74	10872.9	11752.4	10650.3	10480.7	12828.8	15720.4	10917.3	10623.7	10047.1	10136.6	10394.2	8032.63	7979.45	15631	10812.8	13504.4
81.0721108681066_768.907217136401___45	2351.41	15143.4	6970.72	3478.9	2754	3401.31	1176.78	946.583	1217.68	1391.52	1105.75	1326.13	1650.61	1884.86	1671.18	9328.71	1169.63	1725.35	1014.07	1903.67	1300.6	1547.99	1336.43	1099.3	23871.1	31737.2	4159.92	16493.4	2949.86	13202.1	17171	2220.81	4912.73	23383.8	8130.62	2758.2
81.0721403025703_795.763437090355___6679	6555.89	29544.8	11952.9	4179.46	3143.91	3343.28	1320.73	1893.28	1673.81	2087.83	1767.27	2148.89	2620.41	2730.41	2421.98	22989.8	1191.03	2079.85	1280.64	2544.98	1696.01	2007.52	2191.33	1479.58	14027.4	18363.1	8289.43	9073.55	4427.16	27265.8	8877.13	2649.89	3945.26	13762.3	7735.05	3306.57
81.1621701109685_122.934944351596___7263	4.26088	8.2358	0.0558956	0.0378092	6.33495	5.75302	0.0559893	0.0451426	0.0434681	12.774	6.36606	5.25868	4.58424	0.0549343	0.0509082	0.0508358	0.042614	201.726	0.0413265	332.941	0.0396735	0.0423771	0.0454262	0.0395657	0.0597342	0.0645454	11.394	5.40346	5.90604	10.5541	237.13	250.815	5.61493	300.463	0.0402583	363.437
81.2144306407294_981.668838849931__[M+H-CH3]+ 95.2254_1	180.814	245.785	209.192	162.624	262.507	131.354	215.585	207.416	224.072	225.088	233.792	135.094	116.958	71.8308	77.5316	136.925	55.3992	137.363	119.25	86.4381	110.124	180.471	163.362	149.595	193.627	267.939	184.661	191.644	226.941	178.543	171.116	184.808	239.774	290.72	218.503	126.189
81.214100929616_925.256844724186__[M+2H]2+ 160.418_7	119.816	187.91	165.089	179.952	94.4194	106.64	87.1516	49.0304	108.18	144.598	130.286	162.843	188.663	72.6322	67.2496	72.7081	79.913	83.1735	104.432	76.4213	113.862	125.442	130.043	143.521	185.841	295.565	84.0607	204.998	150.973	135.814	166.137	184.913	141.465	215.479	183.845	221.036
81.2985311202709_483.226924823348___110	274.221	250.298	281.483	104.348	44.42	143.125	18.4436	34.5898	9.54073	25.5924	38.2442	52.7062	68.5394	24.0076	54.2116	33.3013	23.9346	19.5031	13.5388	19.6692	26.0181	9.26938	9.90873	51.9704	32.6004	49.2871	34.1808	71.7019	0.0539793	42.1386	32.4271	25.0498	11.2115	11.7475	17.5365	28.4604
81.2947489468791_412.780955156798__[2M+H]+ 40.1463_38	420.644	186.374	420.12	203.954	118.899	253.491	61.8876	108.886	204.266	64.4294	57.1227	90.1165	69.2874	54.3983	50.4599	50.2774	97.524	89.8637	31.8029	99.2116	140.687	69.7982	59.7727	82.7363	72.2749	42.5287	80.277	48.8671	41.5064	63.576	32.6403	50.4013	33.8589	53.1939	22.0342	42.9949
81.4726695593449_982.253991509699___1	106.83	155.594	94.6046	88.6983	175.95	182.533	159.021	138.154	153.837	127.274	151.748	87.1877	113.202	86.0023	77.435	60.5865	88.2202	62.0674	91.7405	78.0989	93.8099	137.891	159.302	55.7873	151.347	114.002	188.889	158.476	35.572	58.396	146.063	91.0729	62.0494	89.3795	126.16	229.453
81.5224984164906_1137.65426209479___7943	473.257	401.685	412.667	442.251	336.445	284.244	324.167	341.352	376.803	468.346	332.926	439.484	567.638	486.411	376.04	391.703	311.547	450.486	349.228	525.637	323.736	365.532	523.154	433.918	520.407	631.66	545.627	408.271	519.174	341.036	605.749	459.218	493.607	513.63	492.267	616.796
81.5078364142272_483.222067449307__[M+2H-NH3]2+ 178.033_110	226.613	130.162	191.445	66.22	50.5903	57.5464	30.7393	64.2381	42.0896	38.3886	31.8702	21.0825	54.9854	36.0114	50.1681	11.1004	27.9642	31.1259	18.0518	16.3684	13.009	9.25733	29.6908	30.3161	6.52008	14.082	22.7872	48.6129	17.6417	15.802	9.26489	5.00997	33.6346	23.4949	35.0303	35.5755
81.4861105056561_414.410300613872___38	202.171	270.545	142.588	57.7424	82.2135	153.756	85.791	69.473	66.4528	76.6368	76.1546	10.5076	13.9015	66.772	67.5739	84.0196	61.2567	27.5373	95.6778	16.5387	35.0319	18.6949	30.0248	34.9897	46.1951	56.9611	51.8381	54.5466	17.8649	47.8764	42.1634	40.4959	34.0085	41.5506	26.5575	86.379
81.5232398293052_123.225456055234___7264	12.7521	24.6436	0.0558956	8.25477	6.33495	5.73892	0.0559893	4.92156	4.73877	12.7445	12.7034	0.0480593	263.175	0.0549343	0.0509082	0.0508358	0.042614	0.0356921	0.0413265	180.527	0.0396735	0.0423771	0.0454262	0.0395657	333.767	7.04803	5.69698	5.40346	5.90604	269.129	0.0425389	501.63	11.2299	307.386	0.0402583	369.709
81.5546289819529_926.71034632414__[M+3H-H20]3+ 259.657_7	178.083	138.504	151.606	147.049	130.214	108.56	139.193	209.158	186.25	138.526	161.524	93.9299	73.2798	156.956	89.4042	121.191	102.551	136.343	95.0324	93.0217	173.593	146.868	114.689	90.9406	170.627	168.505	195.153	166.061	106.425	116.222	117.296	66.6103	118.552	178.613	93.5615	172.241
81.5786361694335_121.500848515171___7265	0.0389307	0.0751286	6.12821	0.0378092	0.0579095	5.76869	0.0559893	0.0451426	4.76448	0.0583543	0.058061	0.0480593	9.1956	0.0549343	0.0509082	0.0508358	0.042614	0.0356921	0.0413265	0.0299218	0.0396735	0.0423771	0.0454262	0.0395657	13.0818	7.06777	0.0522024	27.0933	5.92324	0.0482588	0.0425389	0.0459168	561.776	0.0539001	665.402	0.0652299
81.633401052261_982.236363870757__[M+H-C6H10O4]+ 226.688_1	215.154	171.972	166.218	188.019	214.112	148.761	150.521	195.172	219.58	276.98	156.979	270.151	143.211	203.738	77.435	178.806	87.7154	114.89	120.376	52.3851	77.8182	115.697	186.861	71.7011	294.608	289.841	221.635	108.963	148.168	178.305	177.272	393.334	205.873	187.873	222.973	223.53
81.6759749208323_926.665243727331___7	63.5061	195.792	121.997	154.054	91.4577	133.243	60.8771	113.862	129.508	146.626	164.434	167.912	121.351	142.199	89.5248	77.2724	65.4352	70.7944	54.3866	42.9239	122.564	135.238	149.449	111.249	131.082	276.853	251.247	153.257	112.603	122.778	101.53	211.566	198.866	238.984	191.876	169.041
81.7253746938314_982.32481997543___1	131.397	196.32	155.934	131.585	121.267	186.025	106.796	64.2398	104.173	122.334	185.897	134.842	103.521	95.6325	71.9039	115.549	64.1346	73.4834	80.6553	107.386	101.254	114.07	118.018	98.7006	151.246	184.97	109.248	158.683	106.465	111.483	136.091	75.8941	184.11	148.256	121.965	93.8267
81.8348033259356_982.16412932031___1	110.391	308.312	185.805	125.208	114.885	116.034	140.289	204.096	182.109	282.204	108.871	128.709	119.205	139.985	117.623	132.056	65.4943	86.6401	67.2128	82.1371	72.2002	144.927	93.4312	85.8266	215.349	325.003	103.498	153.096	184.061	74.3221	168.923	423.372	196.226	137.049	200.861	178.027
81.8288974164775_927.851499555287___7	143.571	277.336	157.22	155.151	186.351	137.3	182.58	159.484	108.729	197.389	145.75	150.769	161.908	163.186	153.327	106.015	65.4195	127.975	103.402	90.0206	142.799	134.405	155.64	134.387	234.899	231.58	175.788	206.16	241.776	189.508	197.441	180.575	201.095	274.157	204.316	210.682
81.9169542118533_982.9189145292__[M+H-CH2]+ 94.9197_1	115.897	240.839	195.136	166.543	157.895	183.08	78.7273	74.7278	139.232	96.603	128.118	144.635	127.357	125.529	49.7732	71.5296	67.058	56.4806	40.329	101.5	79.2848	87.1951	60.0206	98.7099	105.752	147.801	176.161	114.386	100.772	172.223	82.2273	130.925	107.15	127.017	133.702	171.29
82.0164767319579_1125.7741390056__[M+H+NH3]+ 63.9896_134	652.316	528.478	474.508	679.461	389.892	526.471	423.776	490.882	523.721	557.621	567.783	508.615	1256.49	1316.49	1220.08	1292.08	1074.56	1023	952.114	1070.98	1188.74	991.145	1108.37	1120.9	1045	895.456	1247.62	899.107	929.004	786.976	1385.39	894.984	833.777	1303.25	1090.32	1116.34
82.0113654363793_127.085077078853___125	189.105	166.626	172.997	163.305	121.742	151.245	208.743	207.714	168.114	252.374	167.385	169.837	1536.6	1063.91	1589.29	1189.65	898.692	882.932	0.0413265	1450.54	913.444	708.982	596.301	304.259	880.31	817.62	583.843	336.574	233.63	298.728	971.469	758.053	534.956	595.981	809.066	895.833
82.0164877603576_1200.10892189723___8387	0.0389307	0.0751286	0.0558956	0.0378092	0.0579095	0.0525653	0.0559893	0.0451426	0.0434681	0.0583543	0.058061	0.0480593	13.3675	133.915	86.1713	134.67	4.52664	89.8878	83.2712	114.409	56.7281	67.5093	97.1429	71.5359	91.798	85.1888	0.0522024	0.049469	0.0539793	0.0482588	99.136	81.38	73.7226	0.0539001	0.0402583	229.461
82.0753902294134_927.034698210828_[3][M+1]+__7	2522.39	2641.24	2062.78	1977.57	2047.68	1998.84	1607.16	1856.38	1841.05	2157.62	1771.11	2052.37	1831.4	1512.39	1175.3	1314.69	1175.84	1124.52	1108.83	960.783	1434.48	1527.67	1619.1	1441.31	2621.18	2764.84	2770.38	2436.16	2374.8	1895.85	2172.76	2072.18	2026.41	3512.93	2366.72	2512.36
82.0751697243681_982.667662028283__[3M+2H]2+ 54.0493_1	2773.92	3272.48	2412.48	2425	2237.99	2193.45	2083.59	2457.63	2019.96	2713.63	2583	2493.81	1688.6	1318.91	1178.28	1449.12	1190.66	1219.83	1225.92	1218.26	1604.97	1578.18	1596.56	1465.74	2127.34	2096.95	1988.83	1703.14	1686.46	1616.75	1896.68	1770.18	1602.83	2493.07	1948.81	1836.75
82.0570998830102_1089.08762085619___33	15609.9	21702.6	18523.4	15509.9	17226.5	15595.4	17893.4	15313	15930.6	20971.8	18266.9	18915.9	89.4899	89.7117	105.446	134.74	55.7355	103.225	133.093	78.7888	56.4997	83.3825	107.948	100.746	2307.23	2270.17	2172.39	1187.9	1224.74	1088.34	1968.06	2088.57	1647.67	2574.45	1993.8	1306.72
82.0751739750958_886.051854057874_[4][M+1]+__112	784.607	963.272	830.136	832.024	789.65	597.152	703.177	726.438	535.678	836.231	663.779	695.657	500.123	464.494	373.391	440.895	420.046	335.224	369.48	425.438	484.377	645.604	592.815	439.212	884.831	1119.45	1188.3	982.552	1032.77	789.3	819.388	1024.03	587.687	1296.36	1152.19	1188.13
82.0694293907498_1055.32760110535__[M+H+NH3]+ 64.0272_3	888.6	1788.69	1696.58	1799.38	991.783	659.569	1442.09	1169.55	1227.44	1274.06	1607.28	868.066	460.89	757.925	612.883	690.985	999.789	467.392	772.658	762.262	1007.01	440.829	665.277	513.061	960.697	1133.24	876.858	896.816	696.842	694.222	407.174	841.32	678.405	1259.19	1002.46	955.651
82.0754158690554_769.517160062586__[M+2H-CH4]2+ 178.174_45	158.608	889.249	509.871	275.393	256.382	295.872	74.2525	124.431	100.61	115.816	128.273	137.835	111.272	139.788	155.983	713.139	111.939	114.615	159.992	138.841	83.2643	164.177	122.834	139.32	1766.28	2369.44	394.141	1372.22	278.896	899.898	827.325	171.48	304.851	1784.93	681.555	301.567
82.3434992512619_398.058134000863__[M+H-C2H4]+ 109.361_8	63.9143	115.54	128.629	131.528	114.219	136.448	81.0482	34.5694	132.452	103.66	71.1535	69.4436	519.442	466.131	500.599	463.928	382.279	559.914	320.924	338.44	275.369	247.98	363.733	304.872	200.462	281.473	211.469	218.665	121.035	224.216	234.15	155.584	139.072	198.528	81.9818	149.369
82.5556479691994_397.832224224089___8	45.8398	115.54	24.5007	62.0171	82.4916	80.6171	43.6413	54.2483	66.6771	89.5756	58.11	36.8633	274.906	385.663	346.176	418.477	252.39	409.69	226.382	116.187	460.699	293.412	343.34	339.83	184.855	212.744	212.715	134.984	277.876	151.593	110.4	137.285	169.896	155.708	123.246	183.428
82.5365829467773_123.839787534489___7266	8.50264	0.0751286	6.08566	12.3525	12.6173	0.0525653	0.0559893	14.7373	14.1863	6.36068	6.34274	5.23537	695.905	892.386	283.928	0.0508358	0.042614	210.463	0.0413265	161.939	0.0396735	235.365	253.162	8.6147	12.9856	14.0373	11.3466	10.7594	17.6375	21.0133	13.8839	254.743	5.59023	11.7271	8.76292	21.2745
82.681250420199_122.63804228531___7267	4.26088	0.0751286	0.0558956	0.0378092	0.0579095	0.0525653	0.0559893	4.93499	0.0434681	0.0583543	0.058061	0.0480593	0.0419457	0.0549343	0.0509082	0.0508358	0.042614	0.0356921	0.0413265	166.47	220.741	0.0423771	0.0454262	0.0395657	0.0597342	21.1441	11.394	16.2104	5.90604	0.0482588	0.0425389	256.751	0.0513705	0.0539001	0.0402583	363.437
82.7766399747389_398.026729285564__[M+2H]2+ 163.539_8	42.5559	66.0228	55.0576	49.6137	82.4915	46.0669	74.6763	127.652	57.1518	76.7097	38.74	26.3309	348.841	272.194	247.519	278.429	206.36	320.233	184.549	167.299	225.558	157.438	211.785	215.722	91.2437	112.56	106.889	96.9774	125.462	76.5555	100.104	100.254	131.207	76.171	74.3386	56.8883
83.0150333334181_309.360189282824___104	1055.89	955.59	1042.2	194.882	196.839	149.719	55.3772	69.3208	138.072	51.2338	51.1146	111.111	555.679	606.836	564.053	149.823	153.656	77.8451	85.7288	78.8448	121.402	64.76	89.1237	99.6008	948.307	1297.89	1155.22	151.392	206.427	205.567	171.656	70.1724	84.1494	135.231	113.975	78.4032
83.0170699754554_1125.38353314429___134	111.888	84.2348	99.4805	108.588	58.1829	76.2725	99.7801	105.001	105.576	52.0198	84.2983	132.562	150.444	248.253	227.962	180.836	200.179	193.422	137.534	175.021	207.515	231	196.569	195.275	144.66	171.018	230.968	158.171	152.788	133.116	261.054	205.242	196.368	232.425	155.407	223.271
83.0515309297235_403.915160031581__[M+K]+ 44.0904 [M+H]+ 82.0457_66	2513.51	2741.1	2449.24	2102.99	1996.98	1893.19	1512.96	1490.87	1480.68	1755.42	1401.48	1946.51	2287.14	2296.2	2213.51	2072.98	1764.34	1696.44	1118.07	1399.01	1323.12	1238.78	1467.53	1295.6	1451.16	1433.66	1575.67	1373.45	1195.22	1357.55	1245.64	1036.69	838.882	1512.97	1055.75	1030.8
83.0513881038232_476.018046365781__[M+K]+ 44.0932_10	1512.62	1337.97	1346.6	770.953	648.898	823.056	448.995	485.861	609.141	462.119	466.263	491.152	645.577	720.057	712.888	691.534	582.025	719.741	301.118	236.754	224.704	352.068	438.829	270.432	706.536	1014.92	1060.47	585.507	565.037	711.612	353.6	365.222	482.628	681.344	371.899	403.391
83.0420562526172_126.513196310348___125	203.019	139.213	194.043	98.4806	129.146	125.628	93.2171	78.928	70.7459	57.0581	64.5373	78.3074	512.251	1070.86	841.112	674.527	315.361	704.33	0.0413265	1368.59	277.009	393.645	344.397	124.958	433.699	180.559	203.593	616.921	87.895	621.209	117.297	79.654	359.837	157.772	87.4622	127.242
83.0155031568989_268.236464665228___6299	971.313	810.653	751.371	149.416	57.2588	173.332	74.0732	109.093	100.258	38.5662	25.6235	52.9185	919.881	794.754	831.751	100.283	140.13	93.7607	58.7479	62.3759	91.2826	60.328	99.1855	69.5147	938.233	1114.36	1087.52	205.707	135.934	153.322	97.5478	95.3673	97.8886	130.031	92.2476	114.128
83.0625745904599_1089.97336686327___33	158537	151077	136662	140430	128258	115158	124145	113422	125677	135286	128492	141485	2851.43	1842.62	1883.41	2274.62	1892.52	1641.08	1835.17	2996.66	1878.25	2171.69	1919.45	2168.66	13005.5	7844.11	16481.3	10699	8039.73	6946.67	14997.1	14969.1	8512.28	15002	14280.6	11399.2
83.0878915578709_891.145180644592___4	8923.68	10983.3	7726.79	7709.76	8250.85	7187.85	6987.63	7462.71	7157.15	8484.23	8107.27	7981.52	4746.98	4677.11	3394.88	5454.45	3122.68	3885.27	4273.06	3261.49	5063.08	4996.73	5981.27	3727.94	10654.3	11956.7	9894.73	9184.28	9186.83	7520.6	8938.35	8665.89	7371.35	13819.3	11201.5	10942.9
83.0879002634244_928.773713773332__[M+2H-C6H10O5]2+ 326.204_94	10926	12283.5	9560.74	9168.74	9661.02	8765.09	8147.72	9028.51	8557.84	11807.2	9378.31	10185.5	7056.9	6610.69	5457.93	5964.82	5625.21	5264.07	5358.89	4934.16	7815.5	7271.99	7807.23	6430.27	14401.6	15244.1	13058.8	11812.5	11953.7	9888	10461.6	11540.9	9141.46	16921.2	12840.8	13145.6
83.0878596613709_982.663386715602__[M+3H]3+ 246.236_1	25534.4	29590.9	23878.8	22462.7	23080.8	21234.1	19949.9	21498.1	20600.1	24940.4	22456.5	23435.2	17191.7	14981.5	13231.9	16658.2	13706.4	13125.6	13591.4	13573.8	15809.1	15917.1	17665.4	15028.7	20517	22488.8	20945.3	18904.2	18299.4	15685.2	20535.6	18365.7	16502.2	24999.4	22691.7	23175.3
83.0880187710264_618.123450196112__[M+2H-HCOOH]2+ 210.166_22	1958.62	2087.03	1694.4	1810.21	1767.22	1553.44	1565.2	1569.09	1406.59	1736.63	1668.32	1753.74	2940.26	2622.46	2638.45	2767.13	1937.52	2328.45	2037.12	2896.93	2189.96	2378.07	2930.55	2624.01	2371.42	2324.88	1744.72	1739.76	1576.98	1596.53	1920.15	1591.61	1556.35	2503.75	2042	2176.82
83.0877976914553_846.589533915141__[M+2H-C4H8]2+ 220.223_51	1405.3	4287.68	2719.05	2012.77	1288.89	1315.61	769.703	929.999	987.924	955.234	852.23	1324.05	2135.11	6874.41	4752.05	7966.74	2341.92	1974.48	2359.55	2018.98	2217.53	2313.7	2771.02	2429.93	5468.58	6783.85	4044.2	4351.26	2879.31	5770.13	5190.9	2892.69	2848.89	4943.87	4894.67	3351.55
83.0879088169368_1057.57912539679___9	4478.38	5095.51	3902.59	3980.49	3713.82	3741.19	3436.78	3538.7	3146.89	4267.21	3778.63	4073.63	8700.99	9405.89	8353.19	10386.7	8991.13	7525	8419.27	8993.14	8190.02	7972.21	8937.7	7528.39	9109.64	10468.2	8257.85	7946.32	7804.86	5490.18	7967.81	6945.85	214.532	10957.2	8930.68	11036.3
83.1970901166509_326.700241863688___2911	21.3052	33.0391	18.3928	222.51	165.427	215.156	61.895	118.294	9.51258	88.3886	63.8406	42.1898	32.5514	18.2625	33.4773	11.2627	23.629	7.89467	4.57597	13.2823	30.7851	14.079	10.0379	21.9641	490.383	881.82	705.194	697.488	740.188	1219.62	282.361	336.742	325.259	199.804	61.101	163.899
83.1974079928367_1087.02928040261___33	286.528	314.564	290.676	272.563	281.518	181.164	315.896	451.687	366.946	247.545	184.978	180.665	90.5526	59.4991	39.1686	22.1414	60.8611	49.9296	35.8405	68.1305	25.9137	32.2358	44.2378	47.9221	112.662	35.1223	90.4024	91.3535	46.9819	73.657	87.5294	49.7616	70.0652	117.304	130.885	98.9836
83.2237091596271_474.736850045316__[M+3H-COCH2]3+ 288.668_10	1825.07	2695.38	2537.59	848.803	1051.39	1655.03	734.968	576.024	529.107	374.798	355.979	500.596	1396.28	1241.74	1147.28	1120.51	1113.76	796.154	416.323	300.017	253.551	186.413	276.537	199.307	1743.23	1890.91	1313.78	1386.59	1246.84	2148.02	465.464	1107.69	870.379	538.606	225.513	485.072
83.412033900643_326.754023591571___61	21.3052	24.7793	24.4934	39.4385	208.088	244.933	49.2203	68.2871	43.1778	38.4116	31.9203	56.2232	23.296	12.175	33.9125	11.2627	9.45159	11.842	9.15195	19.964	13.1936	14.079	10.0379	17.5712	562.499	660.998	593.586	638.208	776.434	1278.77	294.682	163.653	252.475	17.8567	81.2859	90.1803
83.4408593519609_474.804826943582___10	1790.26	3163.46	2654.76	844.636	1268.55	1465.25	776.739	596.138	406.771	505.656	407.725	507.87	1474.68	1390.28	1208.84	1090.33	943.473	851.334	203.054	284.759	403.077	155.12	196.571	263.698	1048.14	1222.92	952.555	1428.65	1671.67	1537.11	761.767	776.429	711.19	559.899	260.343	199.475
83.5840319223656_982.468656563653__[M+3H-CH4]3+ 263.756_1	114.499	245.609	256.767	137.67	230.138	237.758	176.886	210.774	165.73	275.898	147.295	217.723	148.241	90.9394	154.87	73.9964	69.249	126.841	68.1395	130.725	68.4903	102.345	190.316	72.9526	214.271	198.387	239.988	271.391	147.868	218.333	244.465	202.821	153.216	180.009	192.928	262.685
83.6153438455271_982.76119939671___1	148.493	199.413	170.402	113.833	144.953	136.912	128.09	132.176	123.727	213.493	171.212	125.642	105.187	41.8392	105.09	126.817	60.0158	98.8095	93.5299	65.1607	176.409	87.1955	145.804	140.421	179.225	277.655	133.023	114.545	171.931	85.0397	106.008	143.49	78.9719	221.519	154.166	136.477
83.6316268947338_326.700241863688___2912	21.3052	24.7793	44.8435	61.6265	196.604	149.903	61.5254	47.674	39.5932	45.4001	25.5363	36.9161	18.6368	24.35	11.3042	22.5253	28.3548	11.842	9.15195	13.3094	17.5915	4.69301	20.0758	13.1784	234.825	534.474	417.203	475.186	381.323	435.221	121.879	186.734	136.333	69.2976	13.3587	36.1923
83.6582450574005_474.793487524806___10	1077	1471.61	1391.61	671.132	535.233	504.988	301.403	295.235	293.461	218.846	216.6	215.023	662.102	806.75	525.196	533.029	433.794	514.245	170.929	90.5486	186.29	70.4286	126.866	95.9198	701.398	612.944	450.487	854.436	673.171	791.54	253.873	541.101	316.781	270.311	174.476	227.52
83.641075163445_403.258116642026___3161	102.019	140.289	135.643	82.651	150.082	143.89	73.676	117.955	112.047	106.859	101.873	100.079	756.646	426.654	479.584	240.2	251.113	228.097	73.1971	50.9399	74.7026	57.9655	80.3139	43.8795	163.175	205.756	204.503	87.5488	88.3557	142.12	23.1709	30.0469	39.2223	41.083	35.0325	42.7186
83.8059337831922_982.715346974408___1	148.445	278.556	137.718	99.7491	186.145	223.33	123.459	124.052	184.378	287.437	122.382	120.402	118.815	105.49	105.211	71.6008	83.2023	93.2213	124.047	138.376	102.86	68.8386	132.93	144.591	286.2	221.062	132.179	125.653	177.629	152.776	171.651	185.356	163.768	163.3	122.64	243.157
83.8546231528141_403.26693538349___3162	42.5464	123.785	67.4201	76.5258	114.161	103.601	67.6181	69.071	66.6577	57.6378	82.8768	84.2773	447.048	564.453	531.685	222.539	335.695	269.639	86.938	39.2439	39.5484	60.1254	50.1962	41.442	45.6891	119.713	56.7513	80.8624	94.2461	31.5823	18.5367	60.0939	28.016	41.083	35.0325	28.479
83.8563116869063_326.725802782404___2913	12.7831	16.5196	42.8635	49.6767	76.1772	46.0662	30.7627	18.4839	19.0252	44.8135	38.3044	26.3686	9.3184	12.175	16.9563	5.63133	37.1021	11.842	9.15195	0.0299218	17.5915	18.772	15.0569	8.78562	36.2684	236.498	181.549	141.548	146.402	197.705	14.1061	111.609	34.1013	41.6657	44.4301	28.8887
83.8751007083837_474.788518421781___10	575.108	829.395	719.265	298.109	295.486	311.442	80.1128	181.796	139.093	135.371	183.535	132.561	325.506	313.111	239.172	273.559	347.291	231.672	36.091	59.051	108.23	92.5554	24.7706	61.6812	293.904	370.086	456.228	389.123	370	400.749	140.177	167.787	112.449	151.207	70.1567	35.5754
84.0143384475578_1125.40301605353__[2M+Na+2K]3+ 75.5637_134	92.8838	109.505	127.981	79.3526	116.366	41.0698	74.835	40.0003	119.973	130.05	91.3333	148.47	175.919	200.63	245.443	235.038	154.214	162.783	143.599	164.044	173.051	168.554	239.637	218.533	222.49	177.168	143.841	119.992	149.045	123.197	211.871	205.72	144.906	166.705	268.285	191.054
84.0461374289266_126.233153333841___125	196.956	157.068	147.153	404.428	298.774	311.695	368.733	557.759	485.02	346.758	477.665	669.34	0.0419457	0.0549343	564.445	916.588	574.683	0.0356921	791.049	652.023	0.0396735	711.529	538.044	221.021	1355.16	706.616	695.302	1447.21	796.938	0.0482588	0.0425389	1077.5	0.0513705	0.0539001	0.0402583	781.245
84.0548240283535_403.426523815246___66	326.576	321.439	336.601	231.805	342.66	279.276	122.793	193.07	247.444	216.345	248.036	245.82	250.975	302.178	397.666	268.197	265.373	208.507	123.298	197.447	200.201	103.034	173.677	190.544	413.708	428.395	353.562	425.861	415.283	365.409	406.777	450.207	240.886	496.196	438.673	418.782
84.0862788943066_927.105528552794__[M+Na+NH3]+ 44.0715_7	2093.02	2222.04	1585.37	1549.53	1889.43	1469.53	1626.56	1576.4	1445.05	1962.75	1647.54	1661.08	1213.31	979.465	769.462	977.825	716.35	865.048	839	809.225	1237.19	1337.33	1389.2	1151	2407.02	2487.47	2367.62	1970.64	1925.34	1332.77	1990.9	1821.09	1452.69	2942.09	2383.28	2256.89
84.0882072566991_982.545128561841___1	3156.91	3953.04	3245.43	2933.66	2956.24	2633.95	2593.29	2659.49	2731.39	3485.3	2998.77	3390.39	1947.61	1681.55	1581.16	2055.82	1619.88	1832.8	1701.22	1661.15	1929.07	1902.58	2212.96	1687.8	2286.99	2717.22	2739.68	2143.49	2312.79	2051.48	2425.64	2153.29	1819.64	3169.91	2971.44	2546.79
84.088052805316_889.915380555915__[M+H-CH3]+ 98.1113_85	912.68	1075.33	907.002	963.562	1056.98	921.54	976.749	969.706	848.852	1207.89	1003.2	1015.47	534.549	445.061	403.099	621.219	365.152	378.738	462.002	426.528	683.598	487.373	635.961	476.658	1282.04	1537.2	1117.65	1181.43	1250.07	954.314	1130.92	1044.96	968.973	1581.8	1312.78	1283.35
84.061930676505_1088.00926697348___33	16616.3	13305.2	14564.2	15381.8	13564.1	10837.3	12210.1	12713.8	13404.2	13241.1	14102.6	15782.8	219.3	166.709	166.875	177.239	143.404	223.02	143.431	180.308	142.608	169.959	122.964	171.961	1394.2	708.718	1744.5	784.803	747.9	568.842	1539.76	1634.93	785.326	1589.55	1377.51	908.899
84.0856519585422_769.776133654087___45	239.725	777.986	437.059	337.152	363.535	295.444	166.828	187.147	230.121	267.169	160.11	232.929	125.015	248.795	184.762	618.939	93.2163	189.43	132.384	124.591	118.162	126.66	158.437	105.4	1798.8	1691.99	378.495	1057	360.886	1042.49	708.892	386.623	451.845	1659.95	597.959	380.956
84.1039516947393_480.85750724465___110	438.258	653.181	404.981	239.964	126.733	204.326	24.5672	63.0473	94.6936	31.9553	38.1745	131.325	128.995	47.9777	60.7013	33.2194	80.2892	98.7396	58.494	45.7757	25.986	50.8439	19.7976	25.9483	106.332	140.723	68.2606	164.749	84.4529	205.892	71.3567	116.985	67.1848	80.125	56.857	35.5336
84.2952816115139_409.883313081559___3836	43.7399	91.7679	145.586	66.9338	171.152	167.859	31.0704	99.866	57.741	84.2602	64.4003	58.6784	169.853	160.201	129.098	106.775	69.6693	73.7432	18.0119	32.6345	34.5631	13.8362	24.687	30.2123	58.5422	98.2744	73.8088	53.7592	41.0972	47.2038	55.4143	54.9105	33.5278	52.7244	17.4766	35.4704
84.3052097663173_482.126146947837___110	90.0833	202.817	238.402	72.6147	123.256	124.671	49.1961	74.1588	38.0619	51.1252	44.6086	36.8947	96.0735	121.137	72.372	55.5022	81.6283	54.4699	31.5822	19.6178	8.67242	23.1107	4.94844	12.993	58.6962	74.8008	79.7519	54.2965	68.6396	139.382	37.0595	63.2292	67.2668	23.4606	13.1363	42.6903
84.5137966189371_381.229458425655___2415	284.485	321.797	265.661	28.9802	25.431	28.8184	30.7767	34.5975	19.0922	25.6075	38.3411	10.5453	55.0778	49.9481	65.9291	22.5539	23.6857	7.91016	13.7517	16.3789	17.6321	4.62802	10.0555	30.7976	6.53494	28.2207	39.9488	21.6298	29.5127	10.5359	18.5558	10.0283	5.60687	23.504	17.5467	7.12926
84.525701613864_482.877747204089___110	445.249	333.84	402.078	204.259	213.02	129.001	71.9133	59.2967	66.6941	25.5931	61.8881	52.7067	115.467	64.495	110.36	77.7032	76.0488	23.3726	18.0518	22.916	13.0086	13.8861	19.8175	8.66203	58.6962	70.4285	71.6159	123.651	41.116	57.94	32.3882	35.0694	67.2668	35.2424	39.4572	28.4602
84.513397926266_319.12945577757___2145	25.5179	24.7436	42.8629	41.3978	38.0404	45.2064	18.4355	24.6828	19.0206	12.7892	6.38792	5.26629	13.7465	11.9867	16.6951	16.6342	13.9551	7.77126	4.50553	3.2694	0.0396735	0.0423771	4.94525	8.64954	32.5697	28.1332	51.1844	21.5581	5.88305	36.8666	23.1482	39.9954	11.1899	35.1727	30.5753	7.10918
84.7345705597284_381.242285798408___2428	164.562	261.36	251.627	33.1202	31.7888	46.1095	43.0874	29.655	23.8653	31.9685	6.38106	31.5948	32.1287	18.243	56.3757	11.2551	18.9486	11.842	13.7217	9.82732	4.39914	4.62802	35.1176	13.1716	32.6747	21.1655	5.70697	10.8149	11.7892	21.0718	9.26528	15.0424	11.2137	35.2016	17.5273	7.12926
84.7271312468715_318.84796742221___2119	34.0239	32.9914	36.785	41.3978	50.7205	34.5081	55.3737	14.8097	23.8044	19.1838	6.38792	5.26629	9.16431	11.9867	5.57202	5.54475	13.9551	3.88563	18.0221	13.0776	12.9876	4.62099	14.8358	25.9486	32.6166	28.1668	34.1647	26.9852	11.7802	15.8	9.27063	19.9977	16.7848	17.6073	8.74521	14.2356
84.748661403904_482.621460362032__[M+H]+ 83.7389_110	293.835	320.306	178.189	165.79	57.1139	200.529	71.5257	63.2378	76.2218	95.9742	50.9812	68.1411	99.3806	78.043	105.641	61.0525	82.8015	70.1179	18.0261	26.1898	21.6811	23.1436	9.90873	21.6551	65.5262	117.13	86.5343	95.9747	52.9234	96.975	46.3244	55.1091	84.0835	70.3818	52.6096	14.2301
84.9618092651314_1136.98343863718___185	3935.6	3549.56	3131.1	3518.65	2990.26	2902.32	2858.26	2666.4	2868.23	3426.94	3089.68	3642.49	6227.04	5354.14	5267.06	5155.87	4651.61	4557.01	4025.41	5509.53	4657.59	4617.36	5418.44	4799.36	5777.03	5790.59	6121.86	5217.69	5398.36	4340.57	8042.98	5104.11	4829.33	7645.13	8178.31	6292.43
84.9557279724389_128.196143893124___125	411.221	224.945	341.741	317.91	184.996	205.412	161.176	185.882	243.156	297.123	197.334	256.103	2810.74	2560.66	0.0509082	0.0508358	0.042614	0.0356921	0.0413265	2104.33	0.0396735	0.0423771	0.0454262	780.581	1757.65	524.62	933.102	506.298	1127.94	731.888	629.19	1400.39	460.195	1824.96	0.0402583	1341.31
85.0306305730938_402.388489945701___8	34247.7	30245.1	29145.8	24778.1	21487	20548.4	18426.9	18608.8	19572.9	18762.1	16299.4	19051.4	34533.2	35593.8	33035.1	29077.5	27517.5	24347.9	16367.4	18350.1	17779.6	16232	19320.4	17567.6	20180.7	20616.9	20873.4	20093.6	18866.5	18520.9	17219.1	15874.4	13423.3	19202.6	14662.7	14104.8
85.0306762600551_474.807311495094_[5][M]+_[M+Na]+ 62.0426_10	14983.7	13240.2	13434.8	8039.96	6765.74	7085.42	4875.77	4787.59	4665.91	5162.27	4433.43	5084.7	9227.53	9353.69	10509	7346.76	7820.9	6371.08	3791.17	3864.98	4096.14	3304.8	3986.8	3950.62	6076.42	7003.58	6660.22	6591.8	6047.82	5868.12	5204.87	4994.74	4201.5	8940.38	9060.48	7229.89
85.0271790122761_129.210785677601___125	1026.58	840.709	958.567	1500.02	1221.81	1184.54	1368.94	1664.74	1559.25	2929.98	2804.69	3531.29	364.514	0.0549343	1240.64	3159.4	2389.1	2016.37	5049.88	1548.91	2073.94	2956.51	3403.92	4579.37	956.482	1570.9	1080.34	3707.23	2297.92	1000.24	3554.78	5119.1	3289.21	6552.57	6186.34	6978.67
85.0305594076249_260.540865055206___123	7669.81	7948.77	7571.88	5675.43	5487.57	6016.83	4737.64	4963.72	4987.31	3243.13	3454.68	3650.31	1230.59	980.806	1035.94	1045.98	926.948	924.545	944.628	1236.37	970.327	899.025	1214.88	1140.55	1029.5	1246.57	1325.05	1027.22	723.107	1140.01	1068.83	1080.8	910.789	1953.06	1413.86	1251.49
85.0304276546091_291.468250417476___7201	3927.55	4780.06	4299.11	15022.2	15309.7	14700	12597.3	14084.5	13627.3	10407.4	10085.7	10917.4	2152.01	1864.75	2169.77	2173.78	2069.92	1939.68	1588.99	1936.86	1641.13	1645.37	1795.29	2027.52	1385.19	1844.91	1585.27	2078.23	1637.68	1974.69	2114.76	2213.05	1798.06	4019.05	2935.17	3094.22
85.0204734802246_1199.18739357083___8355	0.0389307	0.0751286	0.0558956	0.0378092	0.0579095	0.0525653	0.0559893	0.0451426	0.0434681	0.0583543	0.058061	0.0480593	0.0419457	0.0549343	0.0509082	0.0508358	0.042614	0.0356921	0.0413265	3.17782	0.0396735	0.0423771	9.63495	0.0395657	0.0597342	0.0645454	0.0522024	10.508	11.4661	0.0482588	0.0425389	0.0459168	0.0513705	11.4488	4.25821	0.0652299
85.0306283960077_332.172641198802__[M+H-CH2]+ 98.0379_68	17584.5	16879.3	17853.9	12191	11788.7	11326.5	7906.68	8282.96	9345.82	4382.23	4331.84	4617.26	6621.77	6063.29	6562.58	3853.3	3493.31	3243.78	2105.2	2169.33	1961.6	1933.2	2136.34	2038.19	2467.44	2822.21	2745.76	2293.76	2042.02	2525.95	2692.81	2438.04	1937.81	3837.9	2783.78	2823.55
85.0672112171901_564.118381685821___2587	507.633	536.472	451.829	433.98	373.964	400.049	350.36	329.314	464.44	404.302	453.081	370.239	771.54	629.536	604.644	699.535	456.288	702.329	541.747	751.904	595.899	661.607	668.302	767.002	711.615	682.896	613.608	498.632	249.479	441.182	525.575	491.955	407.302	647.033	635.271	666.535
85.0671740053549_507.467582979118__[M+2H-C6H10O4]2+ 314.168_41	381.725	517.99	410.22	444.533	391.645	284.372	343.093	375.093	433.546	346.597	389.479	443.536	663.012	537.12	680.72	813.183	475.204	539.474	501.959	705.85	443.249	521.402	556.234	604.302	580.687	666.557	537.754	549.704	536.698	525.397	581.524	444.94	448.697	688.022	524.128	690.934
85.0673038949197_790.088481291799__[M+2H]2+ 168.118_109	457.147	3378.15	1084.52	788.945	416.284	288.342	267.787	239.787	359.79	313.605	315.155	326.248	310.422	282.492	305.535	5127.55	195.874	352.716	248.948	428.801	222.789	247.646	325.439	217.92	1753.92	2130.59	1597.07	1286.76	765.82	2428.43	1370.15	431.399	496.989	2119.02	860.733	544.528
85.0671069916791_617.822032412092___22	453.501	633.028	433.161	421.301	381.806	379.731	415.99	345.837	200.049	389.558	298.566	552.249	759.4	617.257	449.661	722.083	430.637	560.288	465.999	704.143	485.749	447.047	531.153	656.768	679.259	824.743	520.611	428.878	485.931	495.544	532.447	378.222	392.088	728.093	554.415	532.085
85.1034395532904_982.449968877132__[M+H-C2H4]+ 112.128_1	2236.79	2168.01	1923.98	1934.83	1943.31	1926.41	1764.2	1888.58	1637.91	2093.63	1842.69	1904.98	1243.2	1348.83	1214.64	1511.07	1303.6	1134.99	1206.72	1591.23	1405.53	1368.72	1500.46	1391.23	1931.73	2035.52	1914.46	1459.15	1499.71	1523.19	2094.88	1490.17	1520.12	2279.04	3098.16	2857.26
85.0682066278506_927.21069969105__[M+H-C2H4]+ 112.093_7	966.815	976.125	902.243	1013.17	1030.79	1217.64	806.564	1080.07	786.189	876.121	1108.72	732.367	921.433	792.651	697.451	820.916	606.885	577.273	620.904	591.349	792.725	741.291	964.098	738.926	1501.81	1575.24	1351.89	1167.19	1205.91	967.291	1163.02	1198.57	594.285	1895.84	1473.52	1339.66
85.0782031615677_1087.44460731941___33	78884.8	79581.8	75065.1	70533.6	66091.7	61055.9	64817.9	61332.2	66226.2	75131.9	68730	75756.6	125.394	1188.45	1237.42	77.6456	60.2147	529.881	152.139	596.033	113.898	189.962	136.847	611.32	8137.46	5000.09	10133.4	6533.23	5043.54	3692.8	7687.04	9114.24	5296.41	8186.64	7441.55	5559.71
85.1030750435353_890.567185153929___4	1304.77	661.783	531.537	494.924	441.048	597.427	487.533	808.282	397.933	542.126	477.802	388.994	264.125	218.494	200.447	281.11	278.26	220.909	228.532	273.531	330.138	279.677	372.62	261.486	715.104	812.409	593.578	516.62	656.625	504.967	569.477	589.428	455.233	806.375	556.221	598.927
85.1752462266186_403.868917758738___66	203.243	172.256	182.704	131.208	170.195	136.721	128.316	103.095	132.535	89.0217	126.703	176.236	149.464	210.938	164.636	150.577	231.098	148.69	81.5974	117.324	122.074	92.9803	134.321	100.564	85.562	255.528	131.886	176.398	130.443	92.3797	102.62	140.951	112.632	129.927	105.739	93.1384
85.1842988806454_483.50271007493__[M+2H-CH4]2+ 184.389_110	231.023	156.655	190.081	45.4703	75.9688	80.376	36.8506	34.5393	66.5327	57.4368	38.1967	105.161	27.4312	71.9354	88.9733	44.3501	32.5836	54.4102	36.06	32.6567	34.6471	36.9454	9.88384	51.9022	32.526	63.2935	103.261	37.7639	23.49	63.1142	32.3882	45.0339	16.7964	76.2481	56.8607	42.6291
85.1841715905761_325.886318383733___2914	66.1922	65.9195	95.6167	116.994	56.9967	51.704	67.4463	79.9379	56.9988	31.9352	19.0873	36.8295	50.9016	6.06471	33.7921	28.0594	18.8353	23.5914	18.2368	16.5169	21.9117	37.4072	20.0068	26.2638	19.7488	35.6157	28.7441	27.2929	5.9541	15.9455	28.0641	35.3723	39.5605	17.7682	30.9403	43.1799
85.3335522871617_123.645105747166___7268	4.25071	16.4291	0.0558956	4.12738	6.30474	5.73892	0.0559893	0.0451426	23.6939	19.1168	19.0551	5.24711	466.515	0.0549343	0.0509082	0.0508358	0.042614	0.0356921	0.0413265	0.0299218	219.277	0.0423771	0.0454262	0.0395657	336.175	7.03212	290.558	286.821	5.89126	0.0482588	0.0425389	0.0459168	0.0513705	300.463	0.0402583	7.1053
85.3775423503946_401.07109301355__[M+2Na+K]3+ 171.19_8	137.921	149.695	129.659	204.997	205.554	173.647	140.748	115.262	210.855	167.672	133.264	132.697	143.154	72.5397	151.567	216.844	153.573	179.6	108.859	143.335	100.423	83.8997	49.7967	139.704	145.71	184.538	213.877	141.303	160.989	206.905	97.0784	76.6568	67.7502	129.931	102.034	93.261
85.3895491865101_377.573046214629__[M+Na]+ 62.3993_40	149.446	210.083	183.347	20.7539	38.7115	29.2533	36.932	24.7818	43.5933	39.0215	38.3805	53.5238	55.0653	78.0449	33.4821	22.2127	32.6657	15.5932	22.5893	39.3102	8.68267	27.7193	44.5882	34.6754	32.6826	56.4271	34.242	59.4842	5.90416	26.3267	37.11	35.1172	22.4389	58.7904	48.2533	92.6558
85.5847365868483_398.880166118402___8	293.482	200.203	219.56	361.886	247.383	198.062	273.77	294.208	284.106	904.208	229.394	274.765	103.696	295.707	244.237	252.458	268.086	309.967	157.871	116.294	172.833	152.43	209.737	151.582	510.677	343.428	326.82	389.102	493.416	243.4	386.605	377.647	340.107	496.963	304.16	239.318
85.6129446348059_331.027754756223___3352	115.07	82.4886	108.363	45.5576	57.331	52.9715	36.8768	49.4218	80.8372	25.5765	38.3099	52.6691	68.7759	53.9296	50.0816	16.6339	27.9166	31.079	31.5164	26.1803	0.0396735	4.6272	44.4743	34.6074	13.0331	28.1517	62.5886	32.3676	35.2974	31.5537	32.407	35.0479	50.4115	52.7467	30.8151	49.7865
85.6132712731113_125.732750654034___5730	0.0389307	0.0751286	0.0558956	12.3496	6.29856	5.72852	12.1892	9.80859	14.1863	19.0446	6.33	5.2274	4.55427	0.0549343	0.0509082	0.0508358	0.042614	202.123	0.0413265	9.74958	0.0396735	249.945	0.0454262	8.6147	12.9647	0.0645454	290.558	16.1112	5.86881	10.5067	23.1399	0.0459168	5.59023	304.487	4.38146	0.0652299
85.7186230414531_476.262093311597___10	253.714	287.326	115.167	116.922	104.51	80.5468	61.4996	40.1222	23.819	57.5935	44.593	36.9058	32.5488	87.1116	118.868	111.827	62.9357	120.732	54.1349	33.2107	43.3655	23.479	60.0615	21.6527	46.3153	57.142	83.9573	163.55	111.779	48.3773	61.121	35.5815	51.1913	71.4794	71.0374	57.7387
85.7540608122153_1046.93040334475___7526	148.718	198.348	198.374	179.152	197.653	109.885	145.538	118.708	147.005	277.555	204.676	178.26	72.5306	53.4009	110.107	49.7464	64.6705	53.7451	26.8921	38.854	38.9144	82.7709	122.668	68.7547	255.28	274.253	274.139	134.381	82.1084	142.168	303.538	112.179	184.594	277.888	78.4164	219.218
85.805411681286_398.231623496395__[3M+2Na]2+ 41.8877 [M+Na]+ 62.8182_8	675.012	502.409	467.454	896.69	572.479	464.458	527.241	531.931	606.302	1180.39	293.402	731.161	450.861	762.065	496.605	641.241	554.651	577.033	342.284	642.343	367.676	437.659	472.471	547.329	922.13	720.496	979.393	1003.03	914.681	913.853	1015.68	719.482	697.42	647.951	732.223	623.621
85.8288110351614_482.668621861594___110	326.838	262.393	311.03	119.877	57.1139	177.586	55.3456	44.4953	47.6386	57.5845	108.335	79.06	135.878	108.06	157.197	105.454	121.134	57.6996	31.5822	36.0109	60.707	23.1436	37.1411	30.3171	71.7398	56.3428	157.541	90.7597	76.4992	103.571	50.9568	40.0793	56.0557	68.6058	50.2649	85.3805
85.9380341269676_125.561961931681___5731	12.7296	16.404	12.1713	4.11653	0.0579095	0.0525653	0.0559893	14.7433	9.45756	19.0791	25.32	20.9472	31.8799	0.0549343	44.3541	572.173	287.535	220.765	0.0413265	163.206	0.0396735	13.8139	261.247	34.4588	38.8942	70.0712	33.9839	85.9264	64.557	269.129	13.8839	269.742	78.1276	46.9086	0.0402583	56.6374
86.02093699935_1183.82951051974___7967	0.0389307	140.838	165.913	182.792	108.156	150.23	0.0559893	0.0451426	0.0434681	0.0583543	121.147	0.0480593	236.296	234.451	251.6	178.372	163.16	221.986	203.129	245.015	180.933	185.663	278.298	195.594	518.99	514.899	560.552	388.487	517.327	485.134	388.156	485.173	498.736	645.199	438.457	687.634
86.033713341884_399.885888815266___8	2473.23	1645.06	1871.29	2012.79	1353.43	1319.42	1146	1412.74	1678.09	1544.08	891.402	1757.1	2278.11	2391.57	2030.42	1708.81	1635.71	1751.17	1025.19	1504.64	1207.04	1026.9	1465.39	1303.81	1507.42	1573.22	2024.56	1716.35	1372.59	1220.06	1633.91	1351.08	983.436	1849.46	1647.48	1034.46
86.0341589965758_475.316510692863_[5][M+1]+__10	850.275	844.054	824.718	585.613	350.796	398.362	385.168	238.044	255.366	320.083	343.056	307.602	532.421	577.038	611.992	465.394	433.417	377.296	263.778	276.578	259.649	223.505	254.854	158.8	404.19	478.466	371.351	360.258	419.521	392.731	389.554	348.374	197.163	457.194	463.715	455.433
86.0334218905463_330.092834707285___68	909.326	893.861	854.615	662.102	610.298	610.005	493.344	442.617	601.045	370.437	293.344	276.957	298.088	317.532	424.023	254.722	209.375	197.375	161.834	192.977	138.562	158.209	166.551	164.385	130.273	197.062	263.215	188.061	207.129	110.438	191.298	199.714	145.295	354.142	213.792	220.483
86.0624107514183_982.738849122103___1	6427.79	7159.01	5509.11	5549.43	4983.62	4510.76	4379.54	4781.75	4901.67	5810.6	4937.6	5662.49	3674.35	3258.7	2690.19	3531.43	2847.06	2737.07	3045.77	3036.41	3446.61	3606.48	3759	3194.74	4360.16	5123.01	4632.65	4085.15	4308.78	3680.61	4746.35	3706.94	3670.96	5980.24	5115.52	4862.77
86.0625519538329_927.990295078489___94	3161.54	3672.65	2656.85	2480.29	2409	2255.95	2038.18	2596.59	2184.56	3132.69	2689.28	2899.56	1806.88	1327.69	1208.61	1399.75	1287.64	1208.72	1246.78	1300.5	1946.43	1854.89	1930.88	1589.02	3788.1	3976.54	3602.43	3129.42	2896.6	2317.95	2492.24	3067.55	2430.49	4797.87	3566.53	3432.57
86.0624307032468_890.422583879759__[M+H-C2H4]+ 113.088 [M+3H-CH4]3+ 271.207_4	2114.81	2261.57	1523.48	1929.36	1891.65	1554.93	1582.05	1670.65	1586.39	2076.16	1632.87	1919.34	906.205	679.397	676.904	988.029	707.583	831.736	823.783	779.328	1138.4	1013.91	1133.25	836.967	2515.57	2552.02	2379.32	2136.97	2179.96	1717.99	2167.71	1924.69	1691.22	3328.54	2526.31	2305.07
86.0625999683383_769.91961981026___45	171.166	1279.03	657.735	435.615	241.964	383.053	141.894	124.089	167.224	218.171	159.895	253.771	189.566	175.744	95.6501	924.743	125.594	188.076	127.658	260.826	152.976	168.394	187.935	170.347	2271.22	3096.54	429.05	1603.66	304.758	1943.8	1065.15	352.218	624.589	2519.41	954.166	350.265
86.098741915008_354.952763029746___69	776.737	513.445	632.625	917.526	572.704	375.218	2011.59	2980.68	2768.2	1749.43	1726.78	2076.91	1157.23	1380.97	1641.61	760.97	694.969	862.322	173.258	269.586	178	3358.71	4380.06	4391.37	1446.22	1740.64	1560.17	1322.47	1336.12	1467.55	3026.7	2838.41	2707.09	5887.64	4249.09	4528.39
86.0834069903148_1088.6554548415__[M+H+K]2+ 132.197_33	8045.4	8052.77	7273.94	7566.89	6235.82	6285.79	7151.04	6483.68	7402.19	8600.49	6861.13	7693.98	90.5884	172.437	99.8472	123.598	130.068	80.6422	111.966	87.3873	82.0601	78.264	122.444	77.7747	716.83	692.109	1110.41	545.153	896.475	446.839	731.655	729.118	649.813	781.359	503.76	589.966
86.0927452229496_124.791216003795___125	499.57	291.887	358.681	223.654	151.166	217.321	421.803	443.426	423.59	234.572	208.89	355.769	2783.37	1850.12	3594.01	1794.25	255.58	1183.5	0.0413265	3358.28	0.0396735	1767.23	4370.86	382.696	2541.07	1355.61	2086.62	548.904	228.884	393.634	502.379	221.179	553.668	1049.59	2210.13	995.541
86.0987588674129_544.821379726836___7862	268.25	205.161	177.521	249.623	164.89	195.616	282.88	168.272	199.862	281.326	270.268	221.274	199.504	164.311	174.825	162.876	127.462	145.823	86.7574	197.609	105.475	173.245	135.179	162.069	1310.19	1584.09	1599.06	1427.83	1285.03	1243.73	1809.65	1316.85	1239.41	1735.5	1404.3	1437.77
86.0987188704956_435.69482648364___1550	166.013	156.801	110.258	288.613	158.476	172.662	209.134	512.229	401.151	166.445	223.085	303.478	947.43	1070.59	1050.15	619.018	504.804	551.534	429.404	499.471	290.37	442.309	570.369	384.009	615.432	632.944	757.179	421.735	565.859	408.812	781.532	772.644	604.533	1352.93	1079.6	867.105
86.0987397647969_312.696188151901___4864	834.669	732.555	875.844	621.274	670.97	512.304	2690.81	2984.39	3362.08	1974.01	1798.05	2060.64	1583.79	1473.71	1842.39	911.852	709.6	723.025	194.776	339.698	258.869	6652.07	8764.75	7718.66	1728.66	2409.14	1975.51	1969.09	1292.06	2014.59	3794.37	3649.58	2924.58	10918.3	7624.69	8176.57
86.0991427433179_675.143671263582___20	2367.48	1364.02	1373.25	284.766	240.614	172.22	171.495	207.277	156.93	172.302	226.279	157.819	156.111	162.465	145.195	133.469	74.8043	94.0115	45.1899	131.109	73.7816	83.4818	119.216	134.33	1535.93	1759.15	2023.58	816.554	676.228	731.736	758.591	628.86	603.78	690.081	655.867	670.155
86.0990955326041_508.501007318817___41	378.792	173.7	185.844	319.053	180.458	245.66	120.416	206.367	232.183	214.724	172.602	319.248	692.155	408.54	600.555	492.035	384.216	328.064	333.578	399.238	301.758	268.805	300.255	138.622	677.14	770.967	726.624	701.662	601.712	516.441	925.398	651.297	482.358	907.356	861.352	678.259
86.0991911779407_565.882271980183__[M+Na]+ 63.1061_53	897.278	486.736	721.78	435.057	241.292	212.079	233.556	182.612	185.714	209.163	197.753	236.834	471.729	428.873	451.258	299.808	188.831	192.809	130.893	124.231	117.99	156.542	177.153	166.368	640.98	618.584	801.361	571.357	603.634	493.554	726.422	550.43	543.485	826.115	847.529	873.286
86.0985200862157_249.714078426558___5424	862.021	547.882	696.092	504.227	339.802	260.363	1363.47	1875.22	1833.68	661.534	731.764	1013.38	1283.05	1238.91	1277.66	414.745	341.56	365.26	169.44	238.649	209.029	3258.94	3658.57	3901.23	2467.08	3045.18	2967.29	940.011	931.161	1085.08	1930.89	2304.14	1799.75	5121.55	3291.07	3538.71
86.0977926084065_169.365463652365___8321	1601.9	1228.99	1445.8	464.739	337.975	369.968	1165.46	1555.85	1552.84	645.15	792.201	872.928	1896.16	1985.97	4219.83	426.118	612.574	468.035	615.788	634.869	207.197	2493.24	3205.62	2528.46	4833.23	6373.76	7730.59	1057.86	909.312	1015.07	1687.51	1834	1557.7	3821.45	2800.15	3050.65
86.099194650487_455.951682606575___37	568.602	505.116	599.355	288.475	120.894	188.288	240.576	259.064	241.617	224.89	223.906	279.307	151.899	162.256	192.857	155.901	187.041	179.872	95.1254	124.819	108.715	189.691	255.231	203.631	613.592	672.385	537.939	541.917	475.691	508.082	682.833	727.382	533.548	851.527	875.955	691.427
86.1942384607035_1047.95614439315___7517	122.87	231.639	166.667	128.904	163.4	174.568	122.966	194.115	203.315	223.122	173.763	195.406	79.1683	77.8331	83.6805	105.853	73.609	50.2833	58.6949	58.0033	60.9839	55.6676	179.331	68.4724	277.424	155.716	293.958	151.733	135.99	201.697	245.022	257.153	176.052	336.942	168.223	317.664
86.2460630195359_398.494644360695___8	503.118	208.025	234.665	401.138	216.397	335.08	317.444	310.762	333.748	531.75	260.645	340.682	369.487	275.609	301.624	290.758	181.462	271.876	212.415	225.868	266.223	279.307	300.704	290.254	376.001	443.338	496.367	575.245	416.461	326.037	586.399	538.052	412.188	395.042	484.189	245.985
86.3806405161016_123.263179986552___7269	0.0389307	8.2358	0.0558956	0.0378092	0.0579095	0.0525653	0.0559893	4.92156	14.2506	19.1168	6.3517	10.4942	233.796	0.0549343	0.0509082	283.238	0.042614	0.0356921	0.0413265	0.0299218	220.741	234.92	0.0454262	0.0395657	6.52271	7.04803	5.69698	16.2104	5.90604	274.406	0.0425389	0.0459168	0.0513705	11.7812	8.81251	0.0652299
86.4624016686074_398.931231966196___8	142.62	108.627	166.941	260.6	218.096	194.466	143.453	139.125	119.585	228.439	167.549	177.598	91.4051	167.731	186.646	181.002	151.747	106.781	101.626	84.8269	120.591	85.6744	117.752	140.725	286.309	247.8	176.377	220.555	238.511	149.462	304.126	275.234	194.455	242.358	250.854	183.886
86.4591664332944_122.498224166376___7270	0.0389307	0.0751286	0.0558956	0.0378092	0.0579095	5.73892	6.11528	0.0451426	0.0434681	0.0583543	0.058061	5.24711	246.489	305.51	287.375	0.0508358	0.042614	0.0356921	0.0413265	0.0299218	0.0396735	0.0423771	0.0454262	0.0395657	332.676	370.367	300.714	0.049469	5.89126	0.0482588	0.0425389	0.0459168	0.0513705	0.0539001	0.0402583	0.0652299
86.6852324627703_398.518668217333__[M+2H-CH2]2+ 185.374_8	107.861	100.273	74.4253	186.492	57.8268	116.613	118.213	120.012	134.265	186.608	71.0224	177.598	185.208	152.465	217.59	154.918	125.693	58.3231	31.501	81.657	82.2392	69.3058	49.4136	107.944	217.59	257.862	139.982	184.522	160.514	51.7967	155.896	139.688	134.332	171.478	166.125	166.911
86.9043523613852_397.979694407808___8	94.9177	100.273	93.0317	46.0971	57.8268	81.6289	87.1045	85.0087	53.0465	90.7023	90.3922	101.313	103.538	164.867	146.724	145.919	46.5	112.442	49.4486	42.4616	69.1769	69.3058	34.5445	43.1532	136.866	85.1896	144.784	119.614	82.2935	103.489	82.7899	60.0192	61.5446	92.6484	87.36	113.645
86.9292053652112_474.954108147806__[3M+H+Na]2+ 49.9472_10	182.513	377.831	295.602	294.056	221.062	307.588	140.42	185.915	111.167	123.972	168.32	130.204	276.749	505.564	449.184	603.418	425.616	272.46	192.964	314.436	87.9333	170.668	219.578	161.909	177.123	218.589	179.824	237.286	246.37	233.224	250.835	158.728	175.948	159.973	199.132	200.632
86.9445631010731_1123.48067242522___134	171.547	223.663	223.092	158.212	268.548	169.461	229.919	196.807	183.995	207.298	212.147	189.28	439.201	364.642	331.731	402.348	313.89	166.834	229.227	205.141	328.111	326.072	410.532	327.309	327.153	253.485	245.481	168.514	183.095	173.771	351.144	295.825	226.055	402.916	389.059	286.549
87.0098768298575_260.184868743844_[6][M]+__123	3455.01	3364.5	3541.4	1374.64	1621.59	1796.61	820.127	831.598	737.782	379.263	385.049	430.097	83.3652	35.8357	72.1706	145.78	206.285	159.039	391.793	536.953	393.176	374.289	279.877	391.75	112.018	177.865	92.0426	103.549	35.693	84.964	107.57	60.6144	73.6213	83.019	136.786	129.34
87.0099513583656_331.612330871643___68	959.785	760.505	827.407	614.353	722.21	576.319	442.984	481.079	565.487	304.331	266.022	435.261	179.31	138.098	195.281	94.5211	88.5993	70.1012	81.2433	91.7566	95.5051	134.381	113.941	134.399	78.3954	143.171	108.409	119.017	94.4116	135.614	123.65	100.271	128.997	432.335	239.08	285.23
87.0097621992611_375.400970988621__[M+H+Na]2+ 150.032_40	115.064	66.0576	104.142	149.006	107.888	186.739	87.3254	79.0818	76.2266	127.975	174.709	173.782	302.093	256.028	250.77	166.306	181.516	159.577	198.403	179.962	164.546	143.223	192.733	280.627	117.515	168.812	165.282	324.411	288.493	273.897	343.023	294.882	256.599	754.445	324.66	483.167
87.0102641164496_436.869006908359___34	421.845	372.531	295.802	111.736	158.686	121.017	129.352	166.682	162.001	205.13	191.956	269.048	55.1597	36.0831	72.5432	72.2868	74.6643	66.2055	72.295	127.637	104.231	97.2706	128.639	95.4329	78.364	98.7076	108.44	97.3028	94.3889	115.914	153.499	100.351	78.5491	283.379	188.548	135.276
87.0084383582433_172.012558752658___8205	112.556	100.528	124.386	121.783	103.048	87.4786	80.8908	110.274	139.968	123.484	122.771	123.038	86.7589	59.7859	72.2654	214.684	227.986	201.501	422.121	342.965	404.998	203.885	182.741	275.1	169.441	147.863	164.986	97.0346	82.3541	84.1222	143.487	205.047	134.417	300.427	209.648	184.386
87.0094844215695_453.705461899484___7911	90.7743	92.131	80.8043	71.3636	12.8951	46.7853	87.3565	90.2584	96.5247	111.193	129.384	160.738	78.1355	108.056	105.944	72.167	102.574	58.3323	76.77	98.2496	86.7298	148.236	133.636	258.975	136.987	77.4761	125.363	108.047	100.176	110.549	185.853	206.083	166.456	636.473	373.634	383.019
87.0454053801008_401.738268272994___8	1041.09	740.128	1339.91	882.356	597.895	622.848	464.212	766.494	645.386	640.738	560.913	694.402	1008.21	1160.72	917.162	800.453	731.565	713.527	537.179	642.432	592.018	564.526	670.51	680.659	862.144	936.262	861.335	775.494	805.115	785.128	722.842	742.198	605.202	974.003	651.081	669.174
87.0651802826958_618.883192543959___1042	620.018	856.411	382.075	634.05	553.767	622.854	542.9	492.436	422.949	680.762	682.421	633.539	992.195	909.859	1099	1337.09	950.631	1878.98	816.331	684.925	1342.89	964.585	687.464	1777.92	558.291	417.031	579.519	421.958	540.921	440.232	575.322	534.846	489.94	965.833	1092.66	801.676
87.0450712481478_127.530895036998___125	242.463	124.97	142.105	661.521	252.184	180.342	216.02	322.645	262.395	349.331	549.773	289.622	205.689	893.355	0.0509082	1112.66	670.266	633.699	568.513	906.742	473.738	1300.21	897.128	0.0395657	590.947	385.555	471.725	824.005	1022.56	866.682	949.49	936.999	870.753	499.703	629.431	789.254
87.0621591589331_579.504326983782___87	696.839	576.663	451.186	424.438	307.846	391.049	490.325	326.681	408.788	514.251	328.252	461.021	1001.68	927.412	873.479	632.318	532.917	617.793	614.34	671.423	472.852	755.088	696.289	694.196	447.712	473.198	436.683	384.404	395.965	320.335	583.015	290.622	347.89	362.282	432.608	371.454
87.0937642313275_1087.04412264803___33	25593.7	28655.7	27416.1	24661.6	24685.5	22496.7	23378	23169.3	24987.7	28091.3	26100.7	26821.7	2013.28	282.696	1544.41	2328.73	1505.87	1778.24	2051.58	756.406	1478	179.349	181.54	1056.57	3472.28	2226.87	4710.71	2759.73	2016.81	1432.96	2453.53	4075.69	2182.88	2452.41	2118.49	2346.35
87.1019092552619_313.644818897855___4876	81.9442	66.8814	68.2725	54.4938	83.5408	40.825	110.643	160.221	279.539	129.687	89.2822	187.872	109.929	47.9462	105.737	88.6565	74.4085	66.0878	31.5374	29.4259	47.6323	478.673	441.92	454.636	98.9205	121.223	138.15	87.4608	107.379	74.5409	203.018	229.972	156.625	545.912	537.041	548.409
87.1543168515129_475.396645279955___10	495.471	421.679	283.4	256.278	233.599	143.235	175.779	142.793	149.832	133.23	71.2123	164.293	434.988	538.25	557.169	414.892	277.094	483.274	237.262	253.723	238.491	193.148	111.475	195.892	180.163	257.004	170.101	241.547	223.115	189.677	240.921	147.792	125.258	153.587	180.687	112.224
87.157435023282_414.406651969594__[M+H+HCOOH]+ 40.1463_38	313.28	471.962	252.459	320.6	161.928	256.874	208.204	133.46	141.48	70.2504	82.6319	84.0612	249.293	115.111	101.361	101.148	56.5446	205.15	31.9984	33.1335	35.0319	46.8119	60.0496	65.6057	98.9895	78.3215	279.502	138.699	41.6849	65.1841	103.009	50.6199	62.3489	89.037	48.6888	35.9913
87.1895907696686_668.143454599387___798	25.5404	24.6947	30.5864	57.8079	136.226	262.387	132.276	95.3181	157.389	6.38561	0.058061	10.5222	22.9669	6.02181	11.1656	27.824	42.1179	19.5533	9.04712	13.128	4.33846	9.28444	24.8628	8.67426	58.7293	14.0822	22.7903	59.9124	17.6786	58.0087	37.1635	20.0343	0.0513705	52.9875	17.5403	28.4934
87.3644819524316_411.800688599431___6921	277.088	442.769	507.345	184.934	286.544	386.528	276.831	220.487	158.96	154.833	172.434	69.0139	180.141	297.758	346.128	238.83	152.463	151.753	54.5901	36.2714	121.092	65.2286	84.786	67.5382	92.1084	232.5	230.97	108.756	124.707	114.37	37.3105	55.517	62.1573	76.8356	83.7441	21.526
87.3697258667309_474.821135465382__[M+3H]3+ 259.086_10	317.855	237.729	225.937	240.571	176.808	142.788	156.967	132.784	111.72	95.1361	77.6862	89.4912	357.355	358.137	412.491	289.05	299.096	239.826	136.032	129.652	193.446	109.948	146.589	181.137	86.511	158.383	99.0347	244.035	271.314	83.5401	197.405	171.108	180.453	118.894	133.024	131.692
87.5858531508246_475.321437456858___10	153.384	229.861	245.676	213.89	125.627	162.704	87.5166	144.454	104.095	77.9174	97.1077	139.979	111.225	333.227	284.778	333.396	185.572	286.957	178.933	127.599	127.763	77.3555	150.049	132.825	110.939	35.208	93.1223	220.624	161.569	72.9628	120.067	178.8	109.694	176.397	72.3045	85.3808
87.5760015331321_407.435233387347___3825	220.803	246.702	261.507	80.727	131.788	201.425	147.183	93.536	189.716	63.7937	76.2866	47.2554	114.524	156.304	279.171	218.168	195.579	120.249	85.535	87.8263	109.193	96.8341	127.829	103.218	65.0463	119.311	130.584	173.843	105.677	89.1632	50.8069	94.8631	51.4104	117.165	30.5348	42.5631
87.6938559313692_475.215535629219___10	99.37	90.9312	92.0244	50.3823	132.76	81.7083	74.5689	44.5455	24.1667	32.4656	25.8954	45.4768	105.526	48.0562	133.754	99.3586	89.7531	38.9622	108.278	16.3701	56.4357	46.2777	108.451	77.9568	19.5671	77.4576	56.9694	122.87	148.778	137.738	92.6937	122.782	89.6748	46.9754	48.8581	78.2658
87.8068116610526_474.937463553414___10	197.748	109.091	104.294	178.196	132.76	40.8542	116.026	74.2425	66.7982	71.4242	71.2123	80.2237	99.9875	187.091	147.836	87.096	109.503	124.839	31.5796	32.7403	68.013	32.3944	9.90823	43.3093	52.1788	42.2938	79.7571	121.396	115.541	124.927	108.339	138.268	61.6514	107.854	35.0783	14.2489
87.8130201755466_415.777953012674___38	149.129	82.1661	150.912	94.7555	88.3484	179.429	49.0244	108.224	75.7988	44.6155	38.0942	62.9249	36.5177	41.8838	28.0733	11.0626	32.5206	89.1901	35.9943	35.8373	34.5476	55.2506	29.5903	47.4371	32.4864	84.1573	39.7065	32.245	41.0604	31.4387	32.3031	39.8958	22.3304	64.2864	47.9608	49.6189
88.0061428670774_1123.84681184586__[M+2H-HCOOH]2+ 220.013_134	60.1343	66.3467	61.3719	51.0262	70.0182	63.5071	110.515	54.2583	67.0771	64.0061	57.4585	111.154	283.213	256.157	205.271	225.653	161.401	188.66	184.724	134.015	199.907	147.704	230.932	240.788	51.8409	91.3038	113.385	96.7227	82.2185	63.26	248.511	84.5593	100.249	146.725	232.437	99.1311
88.0145311547281_261.709325534037_[6][M+1]+__123	227.406	265.262	172.693	170.366	108.711	127.607	80.5728	64.6691	120.606	90.2855	90.002	116.791	55.4076	54.2834	56.0662	72.5963	70.2738	58.7631	49.8627	85.6179	74.1434	79.1519	99.5264	63.6282	98.5481	92.2161	143.422	65.2188	59.3148	105.913	177.237	45.4556	90.3409	147.56	70.3972	78.824
88.024532603987_475.791402140443_[5][M+2]+__10	543.855	628.75	402.34	412.179	411.417	488.555	264.742	229.993	230.992	286.532	284.963	226.383	470.886	493.019	447.328	448.868	472.125	341.035	266.606	230.976	192.917	215.984	342.967	247.385	393.681	346.517	476.595	729.636	611.214	537.752	632.757	583.015	395.705	419.012	399.806	434.162
88.0289619975891_413.483386222616__[M+2H-CO]2+ 202.032_38	267.556	255.546	277.849	239.739	304.418	178.199	147.357	143.096	204.428	255.739	158.867	289.344	205.77	254.947	296.185	298.437	195.432	205.056	137.135	211.769	140.539	107.644	220.542	205.338	265.546	265.164	265.266	294.421	221.35	245.119	330.132	260.53	187.363	418.661	351.472	247.755
88.068885675519_127.091349243723___125	68.7655	119.433	49.4278	149.376	64.0747	122.16	186.646	370.854	301.961	232.029	51.503	53.7239	721.092	928.082	1411.4	2796.07	1031.85	1047.23	1493.69	903.638	553.393	885.193	1604.45	257.126	473.184	543.583	386.003	401.854	473.488	99.3277	0.0425389	498.087	425.734	618.584	401.389	168.605
88.0779745768401_703.387969640084___5055	869.155	874.269	748.866	771.549	718.29	516.606	652.423	491.174	485.124	643.42	663.131	566.165	866.715	713.58	833.68	892.598	593.36	861.598	579.741	752.479	679.587	676.509	987.784	872.083	4936.16	4923.48	5131.15	4728.11	4581.14	3895.75	5490.86	4553.79	4250.36	5741.08	5350.89	5485.17
88.0781175450929_1094.65782417589___33	2601.64	733.432	2460.34	363.562	619.302	1120.88	1877.62	1902.31	1256.78	4074.28	871.968	2361.76	2267.3	1963.65	1644.75	2002.21	1475.34	1646.31	1322.48	2567.84	1418.46	1719.95	2181.16	1847.09	4440.14	4390.74	7920.79	6180.06	5369.69	3509.38	8702.57	6603.38	5869.61	5828.78	5388.59	4726.5
88.114227004125_289.095647454527___13	672.274	465.047	513.544	78.5083	50.6518	57.4379	24.9237	44.3691	28.506	25.5757	6.45322	10.5418	747.764	755.547	757.356	55.3922	51.1217	66.0022	18.0146	26.1324	21.6347	23.0984	29.5876	43.2106	39.078	49.1829	45.491	5.3906	23.5027	36.7441	18.4815	9.98943	11.1888	23.4331	13.1135	14.1926
88.2471449895484_475.397291682127___10	345.165	354.243	296.867	222.936	233.029	251.785	202.927	160.816	161.477	64.9311	90.1607	134.129	323.181	333.861	325.513	352.095	232.312	290.584	263.285	102.307	191.418	155.819	171.679	102.27	322.297	311.13	396.865	367.247	407.076	341.957	388.067	301.218	220.418	325.946	235.954	222.539
88.2520477295694_412.626655065656__[M+H-CH4]+ 103.278_38	64.7	25.0711	37.2416	92.1905	51.2644	110.543	49.1185	51.4703	67.4746	38.3608	69.9772	36.8256	157.13	141.56	56.3119	128.451	131.668	109.56	36.5603	60.3861	61.4048	70.2467	55.1218	61.3322	79.1907	57.0693	116.819	96.6041	41.7635	74.864	58.6637	55.6843	45.3422	83.2426	79.8212	43.2626
88.4380283624273_325.499637466484___2915	17.0667	33.0846	18.3928	20.7261	31.7404	28.7926	24.6093	34.6411	14.2862	6.41032	12.7853	10.5616	22.9561	24.0361	5.57955	11.1178	23.3267	11.6922	18.0674	16.3901	13.0203	13.8976	9.90794	21.682	139.323	65.1623	46.2191	39.5554	136.545	33.4877	42.3077	50.1461	44.0047	29.8271	26.6647	57.9077
88.4640217244183_475.32724218074__[M+3H-C5H8O4]3+ 394.406_10	172.272	463.633	266.842	225.523	236.108	305.946	197.457	152.331	154.044	205.896	151.917	74.1962	164.081	391.073	246.958	353.391	321.925	93.9346	229.606	139.744	219.755	162.655	185.826	157.136	303.217	261.222	263.729	556.086	456.601	356.949	174.239	398.917	459.844	465.994	93.4894	320.642
88.5112563238273_1121.39304143783___134	50.8202	198.8	103.971	37.0115	114.446	126.867	128.757	63.9878	66.1228	140.648	146.67	52.1896	180.926	286.931	201.653	258.187	204.218	115.25	166.222	122.612	151.065	165.909	215.191	182.876	135.927	112.243	124.593	187.897	117.335	115.852	138.562	104.349	144.65	170.05	157.199	106.127
88.50425216874_123.455523809901___7271	21.3059	8.21781	6.09646	24.8249	6.32043	5.73966	18.3458	0.0451426	23.6872	6.38803	0.058061	5.26002	704.346	311.5	0.0509082	0.0508358	487.925	209.896	0.0413265	1047.75	0.0396735	245.317	268.755	12.9493	0.0597342	14.0642	301.952	21.5615	29.4563	5.26419	27.8243	15.01	5.60134	11.7533	30.8438	21.3159
88.6852961644698_475.564537941701__[M+3H-CH3]3+ 278.047_10	141.54	253.128	282.602	163.362	109.03	131.776	75.0142	132.905	134.384	145.793	152.616	215.6	303.47	223.296	192.905	236.915	248.906	195.25	64.2763	121.665	121.11	64.8889	128.807	73.7256	188.346	227.649	145.096	338.886	382.058	214.666	255.876	280.202	252.925	339.927	235.643	297.575
88.6723808573382_123.209462338692___7272	4.26118	0.0751286	0.0558956	4.13748	6.33495	17.2591	0.0559893	0.0451426	9.5004	12.7761	0.058061	5.26002	9.16847	299.519	282.28	0.0508358	0.042614	0.0356921	0.0413265	0.0299218	0.0396735	0.0423771	0.0454262	0.0395657	19.5241	7.03212	0.0522024	5.39038	0.0539793	0.0482588	4.6485	255.831	11.2299	11.7812	4.40625	0.0652299
88.6935646952647_328.695829210288___7176	29.7968	24.7466	42.8126	28.9161	25.3319	34.4678	30.6963	39.49	23.7494	0.0583543	6.36989	15.8007	27.448	17.9567	11.1165	16.6339	13.9423	15.5395	0.0413265	13.0612	8.65039	9.24341	14.8088	21.6296	39.0472	7.03004	34.1016	26.9417	11.7529	15.7584	32.3707	14.9818	5.58826	46.835	17.4828	14.2086
88.7355542984196_578.568451988287__[M+3H]3+ 263.188_87	25.6248	49.4812	12.2718	8.29403	19.0702	5.76663	12.3145	4.94442	14.3119	0.0583543	6.37996	5.2753	50.4367	172.001	122.796	27.8051	9.33872	7.80696	18.1048	9.82235	4.33448	18.5381	19.8308	4.32524	19.5782	49.3331	39.8532	16.2179	5.89722	10.5512	27.8114	5.01593	5.61024	0.0539001	48.1972	21.3871
88.9069127893143_475.241560981203__[M+K]+ 49.9472_10	155.229	123.997	148.734	194.658	51.4736	81.7083	81.6451	34.6465	111.707	71.4242	64.7385	53.5897	64.8653	126.263	102.666	116.354	109.581	162.604	81.0936	94.5963	60.7769	64.7888	84.2199	69.3887	65.3091	121.462	91.6419	152.238	168.917	110.971	191.076	143.741	120.688	161.49	136.271	121.638
88.919628245371_331.861202936577___3353	34.7847	49.5442	42.8625	24.8444	38.0886	51.7611	6.14459	9.88683	14.2654	19.2091	19.1554	5.27351	27.5101	29.961	16.6945	11.1054	4.65391	19.4474	9.01328	9.81754	0.0396735	18.5111	19.7663	21.6563	39.0991	7.03818	34.1475	32.3677	17.6522	21.0359	18.5227	35.0479	33.6061	35.1645	13.1265	21.3371
88.9561870678292_578.828207556427___87	29.817	24.7094	30.6008	24.8123	44.3822	23.0079	6.14261	39.4582	47.5824	31.984	31.8183	26.3037	54.8868	47.9927	100.143	38.8167	41.9157	19.4626	31.5935	45.6629	56.2067	64.7343	34.6106	47.5182	52.1429	77.325	68.2384	59.3135	29.4108	31.5714	69.284	40.0247	39.1679	87.9944	65.6608	113.775
88.9839463111003_1185.97730643675___7968	0.0389307	58.1087	0.0558956	0.0378092	63.0767	97.386	0.0559893	0.0451426	0.0434681	0.0583543	82.1828	0.0480593	184.296	120.724	162.849	145.27	47.1017	117.193	131.385	134.699	111.834	134.929	164.739	168.228	373.126	315.44	288.04	265.564	373.087	263.361	308.375	285.044	247.793	335.791	391.041	198.685
89.0096858280822_1122.80012645106___134	218.583	1126.48	613.04	265.936	540.585	558.973	630.362	457.356	326.858	2015.73	591.764	443.035	699.561	835.152	768.106	860.601	770.53	781.242	690.418	650.34	724.704	793.404	970.9	743.082	713.121	568.205	521.597	629.081	604.284	540.799	746.416	677.896	621.168	679.03	891.469	699.731
89.0629073322781_1086.91247014747__[M+H+Na]2+ 154.13_33	1385.42	918.282	1539.82	345.067	1202.33	1297.44	1647.71	1136.82	639.76	1441.94	1063.37	1076.52	2600.51	2994.34	2550.35	2197.17	2063.16	1808.88	1942.7	2485.33	2072.56	1990.32	2456.52	2080.03	4324.65	4495.26	5063.82	4361.74	4715.13	3456.38	4264.74	4097.56	4575.33	5052.36	4645.53	5385.12
89.062207125365_903.69207725074__[M+2H-C2H4]2+ 204.146_18	778.661	624.342	614.285	687.108	590.138	450.163	514.085	409.365	402.313	476.231	827.708	685.864	631.121	596.143	619.517	488.214	402.828	506.745	500.739	527.984	430.628	586.869	519.254	460.304	2545.59	2874.06	2281.43	2162.25	3017.9	3022.8	1700.12	2124.39	2514.9	1863.59	1624.02	3609.84
89.0622424899314_709.702621225563__[M+2H]2+ 176.112_36	419.254	221.602	213.262	317.366	209.955	195.519	230.384	172.378	272.253	280.363	209.514	224.36	352.608	156.663	183.716	222.693	145.986	187.874	203.578	251.121	180.613	216.788	208.377	212.275	2889.93	2395.59	2849.24	2506.4	2153.99	1844.48	2496.91	2463.5	2180.69	3065.43	2480.4	3380.14
89.0642816353077_1018.5796331559___27	704.468	533.145	603.703	510.474	684.75	590.837	525.862	742.978	702.75	872.18	713.962	646.301	776.817	809.596	1030.88	610.783	602.012	636.868	650.421	867.503	431.696	841.207	838.836	767.413	1981.64	1919.12	1802.61	1460.67	1542.18	1281.21	1616.78	1388.52	1616.87	1971.19	1865.85	2155.92
89.1094358491136_287.573611322653__[M+Na]+ 66.1157 [M+H]+ 88.1002_13	1901.47	1408.18	1830.68	1880.6	1604.04	1534.83	1669.56	1715.26	1892.06	932.637	878.313	1219.36	54.9523	47.9806	44.5904	22.2138	32.6104	42.806	18.057	45.7837	26.0232	41.6364	44.4884	43.3152	730.366	852.75	681.455	1083.83	714.686	1187.28	879.651	939.157	692.681	833.171	488.795	356.795
89.134085337321_475.283806232679__[3M+2Na]2+ 44.0932_10	169.908	82.7885	90.8215	164.183	51.5758	46.7821	37.5071	49.5814	67.8041	268.556	32.3692	94.4728	114.508	36.0422	27.9034	49.4883	89.2298	128.159	27.0682	75.1786	86.584	50.9842	80.6024	47.7048	122.463	56.3328	81.5054	218.51	120.045	158.025	105.696	115.508	183.671	149.034	114.811	56.9206
89.1438407363542_332.074478633826___3354	68.2063	16.5147	36.7846	37.2665	25.3924	23.0328	12.304	24.7171	14.2825	6.40304	6.38502	10.547	13.7549	5.99967	33.4308	16.6581	13.9794	3.88948	4.50664	6.53679	30.3396	4.62777	9.89475	21.6563	6.52435	14.0936	17.0945	16.2078	0.0539793	10.5309	18.5456	15.0016	16.783	23.4707	21.9038	7.12113
89.3519523163884_475.559216482483__[M+3H-CO]3+ 293.039_10	253.215	134.251	164.565	165.871	64.4697	147.749	68.6248	65.1827	92.52	218.953	32.3056	81.9492	160.376	167.011	39.0213	88.8038	69.0592	90.6785	40.0222	42.5619	34.8149	32.4023	39.6329	85.2035	71.7451	84.4992	89.2203	219.665	218.787	213.48	144.022	124.955	134.758	82.8384	158.452	92.4959
89.3646509161239_331.144700862123___68	38.3099	24.7474	42.9155	36.504	25.3603	11.5025	0.0559893	9.87247	14.2826	0.0583543	12.7703	10.5342	36.6801	5.9922	33.4309	5.54596	4.65391	23.3093	0.0413265	0.0299218	0.0396735	13.8651	9.88317	12.9776	0.0597342	14.0936	11.3963	5.40121	5.88407	21.0618	27.8185	10.0014	11.1887	23.443	52.5693	7.12113
89.5085578246258_1120.93732025141__[3M+2H]2+ 59.0042_134	180.991	3416.88	1452.1	172.898	2298.93	2119.88	2354.15	907.285	382.976	2120.75	2480.62	258.765	2471.04	3155.49	2986.07	2811.04	2351.83	2260.47	2287.39	2182.56	2645.85	2611.94	2725.26	2615.08	2272.6	2006.81	2132.17	1982.77	2019.9	1661.97	2683.05	1670.04	1820.16	2288.37	2785.75	2145.67
89.5085412226116_1062.59595497378___5460	1725.26	2201.72	1508.87	598.73	1747.15	1687.98	1586.87	1255.01	1235.41	1642.35	1799.49	1936.33	1993.95	1757.86	1754.88	1871.9	1568.77	1540.44	1898.22	1693.96	2035.65	1536.65	1701.86	1945.18	2280.22	1686.83	1782.15	1906.56	2309.37	1526.76	2562.47	1707.97	1579.31	1932.89	3503.6	2515.5
89.5027623633534_127.627090698098___125	206.92	192.097	224.362	180.327	160.187	177.067	210.768	171.207	122.626	213.154	197.85	207.436	1216.92	427.398	827.728	2331.73	1220.76	945.793	1309.74	835.772	565.855	1837.56	247.985	218.586	1577.44	467.656	1542.87	1544.98	1218.45	335.16	1113.26	1129.19	478.541	781.916	870.153	468.128
89.5889551919083_329.976008105969___3355	46.7607	24.7182	42.8126	41.3087	31.6649	28.7231	36.8355	24.654	18.9995	0.0583543	38.263	15.7831	9.14731	5.98555	11.1165	27.6926	4.64742	11.6415	17.9902	22.8574	17.3008	13.8468	14.8088	0.0395657	32.5393	14.0601	5.67783	16.165	0.0539793	10.4946	23.0972	19.9758	11.1744	23.4175	26.1917	14.2086
89.7964192682152_418.882347602224___6233	315.21	405.447	296.439	57.8035	75.8863	86.1865	36.8571	64.09	47.4737	70.2375	31.8124	47.2859	41.173	35.9853	33.3492	38.7677	32.5552	27.1671	45.0216	22.8542	21.6437	27.6959	19.7467	25.909	78.1235	70.2563	138.153	48.4701	35.2721	47.2591	13.8744	64.9604	22.3772	58.5562	48.0638	35.5123
89.9426241721283_1196.24430571254___8248	323.481	0.0751286	0.0558956	182.643	178.026	167.619	0.0559893	0.0451426	0.0434681	0.0583543	0.058061	0.0480593	116.409	87.2172	377.495	236.742	132.74	111.555	209.416	225.871	416.104	328.397	172.047	226.213	0.0597342	0.0645454	0.0522024	0.049469	0.0539793	0.0482588	56.9001	0.0459168	0.0513705	56.0427	0.0402583	0.0652299
89.937526901473_127.92280760618___125	56.0039	33.3252	30.8924	54.2238	25.5734	11.6343	12.3716	24.8846	24.0163	12.8905	32.1195	58.3813	986.516	1172.05	463.179	338.774	717.61	729.317	284.433	294.43	450.019	680.622	881.07	216.068	197.193	297.703	581.851	181.748	508.351	167.079	449.086	89.3788	188.955	614.778	265.917	267.264
89.9257998222858_757.819017863323___2184	21.2629	33.2749	24.7527	20.6366	25.6838	17.2813	24.8793	29.9967	43.3355	25.8797	12.7228	26.6413	55.8573	60.1996	39.097	50.1242	60.7802	55.5085	45.2784	39.2959	30.3957	69.7498	60.3545	73.2066	72.6896	49.8604	46.3031	43.7157	47.768	42.7196	89.146	66.2066	91.3812	322.379	138.155	180.745
90.0090264762507_1121.08234791139__[M+2H-COCH2]2+ 220.013_134	63.527	329.038	189.398	49.3505	270.589	195.86	407.072	142.604	89.7424	242.686	290.511	78.2879	363.077	359.02	375.878	390.152	354.225	279.466	300.321	283.15	353.6	314.409	354.356	349.651	294.787	182.402	158.536	200.391	264.683	220.696	377.774	175.575	222.551	348.378	451.727	385.889
90.0062538023508_407.776180139177___3826	93.4974	450.574	692.13	55.3818	320.18	233.433	198.858	191.479	113.116	197.153	161.831	212.107	52.9414	71.9035	61.1314	60.8853	69.7425	38.8205	45.0189	39.1197	34.5705	36.8607	39.4988	30.2115	117.206	98.3788	68.2004	79.1379	70.5237	94.4832	73.9778	59.9789	67.1265	70.2992	43.6827	99.4192
90.0572725692833_183.290569709785___8200	272.362	208.748	216.679	217.181	186.116	180.174	217.337	227.706	211.66	233.148	167.764	296.142	212.146	137.18	173.877	132.665	143.589	125.548	139.126	184.418	107.747	142.834	214.284	207.149	195.101	271.26	263.027	215.227	177.769	257.019	298.262	233.575	195.704	359.029	311.687	262.824
90.1257298167909_406.166152499483__[M+H-C4H8]+ 145.188_66	501.607	713.835	428.412	215.479	403.77	390.703	400.937	399.133	211.222	452.596	354.773	280.276	64.0771	125.94	105.707	61.0322	65.1683	46.6447	31.5842	22.8702	34.6477	4.61761	39.587	17.3044	91.2625	126.597	39.8273	75.4029	94.1379	52.5605	41.6579	65.0512	55.9888	11.7465	21.8912	42.6645
90.1411810440243_757.80030811477___2187	0.0389307	33.3421	0.0558956	12.3819	0.0579095	28.8456	56.0897	15.0277	53.0722	12.9656	25.4457	5.33885	18.3822	18.0836	27.9265	27.8468	9.36309	11.7432	0.0413265	6.54932	17.369	32.5499	14.8958	100.197	26.4326	42.8209	23.1516	16.426	29.9134	21.4034	51.7123	56.021	17.0621	367.281	61.3905	120.004
90.2444644556047_406.137460465421__[M+H]+ 89.2405_66	653.355	470.943	722.574	592.796	725.007	478.877	433.84	369.311	406.958	421.456	334.164	500.874	203.064	204.085	189.16	156.41	116.235	77.656	81.0136	55.542	77.7779	41.5142	44.4354	60.4225	162.969	175.636	130.861	145.619	70.5229	120.755	69.6223	95.3664	106.379	87.8533	65.4954	35.5138
90.3625014459129_406.986094649768__[2M+2Na+K]3+ 93.0803_66	399.031	515.192	391.046	444.515	354.122	153.255	184.421	296.21	187.283	270.014	200.948	231.697	132.367	46.8704	66.7635	33.2435	9.30951	46.6447	18.0269	29.4039	38.933	18.4704	24.713	21.6041	88.1466	77.3649	51.2066	53.8567	35.3004	47.3062	27.7722	20.0158	44.7913	35.1884	17.4882	49.7752
90.3677425501827_757.819017863323___2188	4.30794	8.3188	12.3764	12.5436	6.42094	17.5065	12.4396	19.9978	24.0753	6.46993	6.44426	10.6565	18.3569	18.037	22.3412	33.4161	9.35006	7.81837	4.52784	29.4298	8.6845	37.1513	25.1477	4.32848	32.9752	14.2455	23.0999	49.1775	29.8546	21.3598	32.8433	20.3348	34.0467	167.837	26.653	107.304
90.4727368020922_407.014365509803___3870	242.739	156.449	214.243	256.109	208.503	282.782	265.315	197.873	181.884	230.366	89.0011	214.819	125.212	95.8744	66.6869	94.0903	69.6681	89.2853	58.5239	48.2577	34.5699	59.9662	59.2477	30.2107	71.5509	77.2012	73.8085	53.7477	64.5805	99.653	73.901	69.9725	44.7401	82.0156	43.674	42.5631
90.5087457127484_1122.93573252593_[7][M]2+__134	4686.33	5788.95	4628.48	4218.81	4781.94	4403.58	4891.68	3988.63	4034.83	5308.82	4562.55	4910.03	6466.31	4631.41	4421.3	4904.16	3772.85	5124.26	3454.45	5737.29	4101.12	4955.88	5515.79	5294.26	5777.26	4937.24	5864.86	5269.37	5208.99	4046.6	6455.17	5065.95	4826.4	6415.03	7189.93	6136.21
90.5087247025432_1055.47552922936___3	997.806	1465.21	1295.85	742.261	1388.52	1493.97	1317.97	1011.18	935.502	1133.21	1482.06	1015.52	1781.89	1624.04	1582.2	1610.91	1424.05	1486.5	1630.42	1396.81	1433.08	1642.87	1988.64	1708.68	2111.5	2236.88	1795.64	1699.47	1921.66	1353.5	3639.94	1629.27	2083.48	2330.52	3570.84	2214.43
90.5041936026064_124.510070345529___7273	12.7272	8.21781	36.5788	20.5875	12.6409	0.0525653	12.2087	19.6498	28.4246	12.7214	19.0282	20.9415	269.824	0.0549343	0.0509082	559.629	237.669	607.218	0.0413265	682.531	259.696	0.0423771	0.0454262	43.1644	58.4353	28.0746	288.898	548.901	29.3959	305.323	0.0425389	297.026	326.582	610.056	449.381	56.8424
90.590434590188_757.837727611876___2189	12.9238	16.6375	18.5645	8.3624	0.0579095	0.0525653	12.4396	9.99891	24.0753	12.9399	12.8885	5.32826	18.6191	42.1398	16.7559	22.2774	14.0251	11.7275	13.5835	0.0299218	13.0267	55.7269	25.1477	26.0045	26.3802	42.7375	28.8749	32.785	29.855	32.0397	46.9189	25.4186	22.6561	65.4784	35.0077	50.4915
90.6847382682692_411.18121907681___154	130.381	41.7852	190.999	81.2448	115.538	139.864	146.346	118.645	77.1138	90.7389	51.5961	26.6732	60.3328	238.588	147.945	83.1342	88.4435	54.4099	31.5621	33.132	34.6098	23.0798	29.6494	34.5703	85.935	71.3195	40.3774	54.6257	95.4551	74.5989	32.8492	45.6472	45.4191	59.4567	26.6069	50.4632
90.6737971586327_122.11134718839___7274	0.0389307	0.0751286	0.0558956	0.0378092	0.0579095	0.0525653	0.0559893	0.0451426	0.0434681	0.0583543	0.058061	0.0480593	0.0419457	324.173	0.0509082	0.0508358	0.042614	0.0356921	0.0413265	0.0299218	0.0396735	0.0423771	0.0454262	0.0395657	6.52271	7.04803	0.0522024	5.40346	0.0539793	0.0482588	0.0425389	0.0459168	0.0513705	305.636	0.0402583	0.0652299
90.6745754406692_372.141381417669___7850	38.5264	91.2323	24.6211	20.7869	0.0579095	11.5596	12.3565	19.8695	9.5711	6.43022	6.40484	21.162	128.374	156.309	145.956	44.5689	18.72	27.3712	13.602	6.57121	17.4114	4.64184	14.919	13.0456	32.8051	28.2856	34.2926	16.2814	11.8434	5.27267	18.6179	25.155	28.129	23.6011	13.2001	14.2957
90.915288326641_412.833787499628__[3M+2K]2+ 34.6339 [M+2H-C3H2O3]2+ 265.816_38	128.578	49.4606	112.898	107.043	88.6342	127.521	79.8181	93.7525	99.8372	57.5412	57.2691	68.3903	162.54	127.919	169.736	89.9041	103.652	86.514	36.5693	29.8195	48.3333	23.4008	35.0862	74.6125	79.325	112.194	109.078	43.7977	47.8166	74.7362	28.2138	55.7777	45.4213	65.5232	66.0994	65.1949
90.8866687175236_371.870786298241___7793	4.27378	24.8395	12.29	8.30141	0.0579095	11.5413	30.8413	4.95927	0.0434681	6.40891	0.058061	0.0480593	124.815	114.231	134.199	27.8045	51.3944	3.90368	0.0413265	13.1208	8.67863	13.9004	0.0454262	17.3393	13.1003	21.1807	22.8617	10.8365	17.7089	0.0482588	18.5871	20.0911	5.61685	23.5156	13.1565	21.4083
90.9285276986543_740.764084015368___3470	16.9536	0.0751286	6.10153	12.3436	31.667	11.4976	12.2722	9.85909	14.2544	6.37773	19.037	20.9944	27.4772	12.0309	16.7448	16.7028	23.3358	19.5449	0.0413265	32.6193	8.67598	13.9295	24.7588	38.9639	25.9742	28.095	28.4374	10.7602	29.4479	10.5135	27.7239	15.0125	27.9053	64.5481	43.6651	35.5053
91.0103534138479_1122.78581925421_[7][M+1]2+__134	382.149	501.95	504.662	411.072	447.607	439.906	397.255	336.381	381.504	538.035	430.786	572.045	723.287	431.736	492.755	499.632	334.951	548.156	429.957	577.205	393.04	643.461	619.087	561.282	631.654	500.815	506.698	406.931	624.086	445.659	712.304	431.037	496.598	654.336	799.635	683.021
91.0564976916034_925.812551670352_[8][M]+__7	3868.93	4653.7	3248.33	2815.85	3375.1	3023.59	2842.08	3278.37	2811.09	4114.66	3451.2	3475.67	2886.8	2779.35	2146.55	2728.27	2429.46	2144.79	2130.35	2071.38	3130.49	3025.87	3049.52	2805.03	4686.37	5109.93	4378.41	4044.23	4056.69	3443.2	3490.86	3927.46	3069.3	5878.05	4179.15	4605.85
91.0566372576288_618.4250142423___22	729.998	721.063	740.909	903.669	782.423	710.862	762.593	754.366	696.142	759.306	726.909	968.164	1316.02	1027.62	1034.3	1362.7	771.538	971.143	869.202	938.14	867.898	904.248	952.854	990.411	985.943	1045.34	784.299	705.816	693.847	878.233	992.101	640.765	587.05	1095.52	871.097	917.83
91.0565012821686_877.970113894487___54	900.941	1067.47	718.737	631.059	700.954	657.007	725.328	672.626	693.099	860.901	685.32	789.462	870.759	598.442	589.736	670.212	480.377	557.188	531.654	514.828	712.351	766.426	732.503	778.499	1315.18	1092.76	952.64	1028.15	879.279	747.316	909.715	1046.55	678.205	1449.3	1055.11	1403.04
91.0497106925368_124.47069856502___7275	121.525	57.3229	85.0356	124.426	69.2842	57.1897	67.0407	117.703	99.1816	57.1339	120.27	94.0931	1912.38	1801.99	995.719	1796.02	0.042614	0.0356921	870.98	14792.9	952.888	1687.63	15499.1	153.78	338.403	1801.31	1442.93	270.241	966.352	131.101	0.0425389	0.0459168	705.221	462.368	0.0402583	790.917
91.0561655811462_1089.19376776317___33	797.051	1357.36	1357.83	800.584	910.151	844.126	865.302	1167.1	1431.87	1540.43	988.374	1412.47	923.316	1015.45	924.443	1096.57	949.599	764.041	709.904	869.252	731.598	971.764	902.412	812.664	941.785	1168.48	857.028	850.071	840.247	798.733	487.456	629.228	709.188	1022.81	697.061	794.343
91.0564567383335_310.990198737423__[M+3H-C4H8]3+ 326.197_104	299.457	288.362	364.835	299.195	228.038	280.903	260.39	285.759	269.618	365.845	377.049	414.242	2232.4	2168.11	1962.5	496.835	405.612	530.937	437.615	472.259	416.927	445.607	564.858	446.915	923.768	936.221	806.064	549.185	346.706	494.407	674.694	599.033	485.427	862.311	580.708	616.829
91.0566018781245_788.09700144859___21	1207.04	4691.94	2251.71	702.376	504.153	559.494	333.658	353.015	455.464	447.504	359.095	447.273	519.268	610.3	541.777	4708.95	303.885	465.97	343.001	512.087	406.698	503.084	484.056	344.707	2387.48	3360.12	1445.04	1866.12	676.442	3596.92	1465.67	538.895	604.391	2358	1108.49	606.984
91.0564779704727_770.688934041904___45	1250.04	3392.8	1918.16	831.992	682.074	799.604	356.896	420.171	486.45	377.692	433.854	524.057	623.291	666.284	649.423	2634.31	380.708	516.073	332.063	572.524	412.263	600.646	523.573	529.292	4055.2	5351.63	1064.69	2937.2	687.171	2093.03	1750.12	652.463	874.415	3721.84	1589.85	643.206
91.0565403871727_372.509027512827___7857	580.193	638.043	643.478	728.397	521.177	624.295	416.85	496.264	474.124	856.803	603.663	976.3	601.261	536.607	233.491	992.581	577.538	576.785	629.132	925.321	674.526	633.589	835.973	908.14	1248.64	1382.01	1430.39	1770.87	1622.04	1846.07	1382.26	1584.5	1593.83	2080.49	1276.37	1345.1
91.1353441874004_415.294779383665___38	59.7176	41.2697	143.356	53.8712	63.7889	103.673	73.9035	44.546	57.1022	19.1997	38.27	26.3307	64.2068	172.382	150.425	94.508	89.9153	31.1719	18.0776	16.3862	52.0051	13.8859	59.4776	34.6182	26.8513	92.0001	34.1968	59.3803	35.3628	52.635	46.3465	20.0362	44.8613	41.0918	21.8912	28.4853
91.1159396164669_374.158535684145___7794	8.54776	33.118	30.7173	0.0378092	6.3638	17.3078	6.16829	14.8776	4.7777	38.5096	12.7947	0.0480593	273.731	234.451	183.193	33.3748	32.7049	31.2226	9.05098	3.27997	13.041	4.63342	4.96255	0.0395657	91.6705	42.3826	62.8726	5.41827	11.8234	21.085	32.5198	25.1141	0.0513705	11.7782	4.39301	0.0652299
91.2664451963282_740.72714660853___3471	4.23841	16.4088	12.2031	8.22905	6.33339	5.74878	12.2722	29.5773	52.2662	12.7555	6.34568	5.24861	9.15905	24.0617	11.1632	33.4057	18.6918	11.7269	4.52567	26.0954	8.67598	27.8589	24.7588	12.988	6.49356	42.1426	28.4374	21.5204	17.6688	26.2838	18.4826	15.0125	5.58106	76.2842	30.5656	35.5053
91.2881918743783_668.108074647505___17	25.3012	8.21854	24.4366	41.2913	31.6798	63.2329	84.535	137.874	99.4947	0.0583543	38.1404	47.3498	9.17459	24.0553	11.1656	100.102	46.733	15.621	31.6649	29.4111	21.6923	0.0423771	24.8181	30.3181	52.07	42.2466	17.0927	86.1462	75.2408	65.4052	38.7658	40.8194	28.0271	17.6369	21.9	14.2467
91.3349473013818_375.012631724605___1939	25.6433	57.9565	12.2869	8.30168	25.4552	5.76926	12.3366	4.95919	4.7777	12.8365	19.192	21.1233	50.5245	226.283	391.905	33.3748	18.6885	11.7118	27.1531	0.0299218	4.34701	18.5337	0.0454262	0.0395657	19.6437	70.6376	34.2941	16.2548	11.8234	15.8137	13.9371	15.0684	0.0513705	11.7782	39.5371	0.0652299
91.3552746197874_415.338088321322__[M+2H-CH3]2+ 195.719_38	147.154	133.677	128.579	49.6001	107.509	51.712	49.1297	68.2123	23.7329	31.9606	57.2602	47.3385	45.745	104.071	85.9212	112.212	55.8734	38.8669	31.5553	29.4156	17.3098	23.0874	20.9407	21.6094	32.566	28.1086	102.326	5.38458	41.196	63.0008	46.2901	44.9731	27.9708	41.0429	17.4924	56.8338
91.506433444031_1122.79599787005_[7][M+2]2+__134	1768.04	2403.12	2180.83	1779.98	1923.67	1882.58	2144.61	1554.24	1720.1	2051.79	2141.91	1913.9	2565.63	1900.4	1899.42	2158.18	1513.81	2112.16	1597.32	2634.65	1784.96	2086.63	2303.5	2322.69	2509.73	2201.37	2491.31	2511.29	2211.85	1871.68	3005.41	2361.24	2078.29	2683.64	3024.26	2631.61
91.4991821006572_122.712004066205___7276	4.26088	0.0751286	12.2239	12.4172	6.31673	0.0525653	6.12819	4.93499	4.75166	12.774	6.36606	10.5174	0.0419457	0.0549343	0.0509082	300.755	487.925	218.157	0.0413265	340.278	0.0396735	0.0423771	517.077	0.0395657	352.245	14.0961	22.7879	32.4208	23.6242	0.0482588	0.0425389	0.0459168	0.0513705	0.0539001	0.0402583	371.793
91.4956932575233_982.08281520047__[3M+H+Na]2+ 52.9948 [3M+H+Na]2+ 52.9948_1	42.4547	147.561	182.597	60.6735	111.202	172.249	318.341	113.138	42.6659	151.856	243.901	191.248	87.4839	119.553	278.534	132.369	133.494	139.896	200.009	73.5021	128.698	55.1478	227.973	201.041	182.779	270.788	230.327	180.036	94.8713	116.499	103.41	256.949	232.008	131.111	171.908	171.646
91.5471417352134_325.740029788405___2916	12.8	33.0394	6.13093	4.14523	6.34809	17.2756	6.15233	19.7949	4.76207	32.0099	0.058061	5.27377	9.18242	18.0023	27.8596	16.6547	37.2698	7.78055	18.0438	3.27803	8.66871	0.0423771	14.846	12.9916	52.9241	106.051	46.2191	43.8099	53.7851	58.7679	28.2052	50.1461	22.0715	35.7209	4.44412	21.671
91.5901609636001_414.261097929678__[M+H]+ 90.5888_38	224.696	132.244	278.644	91.0459	69.8299	40.3612	30.7367	88.9284	42.9062	51.211	6.37095	52.6738	175.703	245.641	330.607	246.96	340.995	221.361	158.791	161.896	190.304	109.544	115.49	148.913	160.634	96.0284	171.902	136.399	231.359	215.625	95.6874	137.46	159.429	111.564	85.6134	135.501
91.5777562754758_474.937463553414___594	72.4599	66.1318	49.0797	33.1559	102.947	58.3631	25.0047	9.899	29	19.4793	45.3169	16.0447	179.465	380.259	309.59	357.263	379.602	388.051	147.082	55.4788	208.403	200.569	159.35	215.289	45.6565	133.93	66.9386	163.897	156.687	128.458	126.007	211.82	162.82	121.682	115.868	61.1179
91.5975093467589_121.838084646887___7277	4.26088	0.0751286	0.0558956	4.13908	0.0579095	5.75269	6.12819	4.93499	0.0434681	6.38699	6.36606	5.25868	0.0419457	0.0549343	0.0509082	0.0508358	0.042614	0.0356921	0.0413265	0.0299218	0.0396735	0.0423771	0.0454262	0.0395657	332.676	0.0645454	314.16	0.049469	0.0539793	0.0482588	245.852	0.0459168	0.0513705	0.0539001	0.0402583	0.0652299
91.714672088623_121.489292486797___7278	4.27269	0.0751286	0.0558956	4.14889	0.0579095	0.0525653	6.14403	9.89672	0.0434681	0.0583543	0.058061	0.0480593	0.0419457	0.0549343	0.0509082	0.0508358	0.042614	0.0356921	0.0413265	0.0299218	0.0396735	0.0423771	0.0454262	0.0395657	0.0597342	0.0645454	0.0522024	0.049469	590.605	0.0482588	0.0425389	0.0459168	0.0513705	0.0539001	0.0402583	0.0652299
91.724455663473_982.43554597156___1	25.421	57.3092	91.5505	36.9602	106.979	191.852	278.172	172.15	37.8382	167.061	274.024	206.3	78.9856	59.7765	395.047	22.0152	73.8648	50.4405	203.903	61.8283	42.8028	77.959	29.508	132.597	164.545	281.059	51.7657	92.6132	100.678	31.8543	32.8667	145.766	84.6317	218.789	48.985	129.183
91.8027882243624_474.88380759183___595	59.7091	115.731	42.9447	41.4448	38.6052	17.5089	16.3618	29.697	23.8565	44.8664	32.3692	16.0447	240.719	380.7	425.084	345.279	286.463	295.091	219.622	221.861	143.56	117.476	191.383	212.134	52.1789	154.876	112.801	195.187	173.707	94.9346	118.149	101.329	115.765	141.321	40.9212	89.518
91.8217948374128_414.211887979159___38	212.6	90.7922	268.072	82.769	44.3274	109.223	36.884	39.5238	52.3584	19.1806	44.5967	52.6082	268.373	147.138	283.443	286.048	228.613	278.847	159.665	125.183	149.055	101.705	140.906	121.981	67.1349	156.782	216.755	153.881	245.735	183.516	177.398	172.228	61.9777	182.251	99.4816	64.0897
91.9544512497701_983.500289760787__[M+K]+ 52.9948 [M+K]+ 52.9948_1	42.4582	81.9997	85.2011	41.1686	70.3384	340.054	285.989	90.8801	61.6358	436.231	231.147	212.951	50.327	77.7885	66.4493	93.6318	65.1293	58.2633	40.3765	48.8706	102.864	82.6063	103.714	64.4504	131.758	177.856	80.5883	136.363	110.608	111.615	51.671	111.441	168.127	155.329	89.0371	62.3533
92.0071581897599_1122.32391132725_[7][M+3]2+__134	312.142	412.345	316.576	280.73	283.683	285.652	237.572	291.183	203.648	333.419	284.558	344.221	341.115	344.578	237.437	279.101	264.005	368.884	214.449	297.909	297.937	320.511	301.184	342.899	420	370.942	384.056	358.565	270.695	204.932	549.302	231.135	304.943	363.954	543.28	375.289
92.0351855654981_414.144743167589___38	233.484	148.579	250.342	90.9357	215.38	137.966	116.799	93.7525	52.3584	70.3289	69.9956	57.869	116.718	239.558	146.555	240.907	176.138	110.528	94.9653	82.9871	137.484	42.2057	45.1109	30.667	120.191	135.347	80.7744	86.677	205.007	161.707	103.153	188.782	78.0632	77.2935	76.65	165.839
92.0275367869296_475.210874791493__[M+2H-C6H10O4]2+ 328.096_10	64.8079	50.2428	93.0756	25.1912	64.342	40.8542	62.5118	5.01406	19.3333	45.4518	32.3692	26.7412	130.634	224.636	316.62	168.516	175.87	147.087	140.485	150.806	166.085	98.9338	39.6329	125.254	84.7906	105.624	130.008	97.4324	76.4864	52.646	50.9815	63.2982	39.2955	62.3294	35.0783	46.7252
92.0591976338419_925.255336983099_[8][M+1]+__7	258.663	411.433	255.552	194.564	309.121	239.397	250.005	206.291	226.596	326.022	254.083	231.799	252.035	293.67	269.644	205.77	208.997	147.967	202.524	102.058	257.174	254.54	284.783	134.016	331.08	334.513	345.246	249.757	272.434	261.705	257.858	332.856	276.296	372.776	323.567	426.106
92.0602195460262_373.194648581301___7795	76.6176	49.5349	104.018	66.1458	44.4228	34.5203	24.5732	19.7556	61.9318	51.1921	101.897	78.9747	77.7671	83.8203	38.999	77.555	60.564	66.0825	58.5839	71.8651	82.3407	78.4532	64.2437	95.2333	78.3512	105.635	119.541	203.757	64.842	140.15	115.817	148.371	109.984	158.522	87.5955	170.787
92.1845412692012_983.80228301261___1	21.5427	83.2089	61.7174	12.5325	76.7328	170.579	130.351	84.8351	38.4795	400.123	208.672	181.283	59.4773	35.8655	66.3643	55.1398	27.7351	34.9418	44.8746	39.0985	72.9431	55.1316	78.69	68.7513	177.779	149.575	92.0923	59.9854	136.339	100.946	89.2137	154.175	45.1675	154.894	49.0241	71.8097
92.2567352796027_412.593295096652__[2M+Na]+ 34.6339 [M+H]+ 91.2486_38	240.267	196.377	236.739	127.216	178.205	139.42	130.492	164.129	135.921	178.281	90.1421	101.012	86.0938	230.24	182.579	168.593	210.981	86.3917	100.234	88.0552	120.875	60.7409	80.0135	96.0616	72.4755	177.717	97.7477	127.579	131.151	143.478	130.853	112.756	54.513	96.0431	26.5173	85.9302
92.2468273467873_475.396645279955___10	30.2437	83.907	74.5793	29.3897	51.5758	29.2388	50.0095	15.0422	29.0589	45.5318	25.8954	10.7179	191.114	122.21	103.271	153.929	116.326	112.124	50.2677	16.3926	60.6967	32.4445	34.6788	47.6372	32.6546	21.2732	28.4846	27.0008	52.9521	26.323	37.0775	30.0655	89.693	35.2315	35.0783	56.9206
92.4807288003639_409.97337781987___3837	111.246	170.751	263.15	262.852	204.684	178.977	259.732	244.128	172.791	224.986	193.483	183.187	86.7913	198.784	152.072	132.732	74.3926	50.4067	62.9758	97.8011	90.636	73.7065	44.3828	90.637	104.208	162.721	107.984	141.534	135.203	138.164	73.9613	30.2849	61.533	58.5827	57.1413	63.927
92.5054755335638_1122.76209982476_[7][M+4]2+__134	324.038	474.974	341.905	265.282	315.534	276.738	298.779	318.713	349.154	362.545	310.367	308.463	434.021	326.849	313.524	331.989	324.393	414.942	292.276	390.904	270.33	433.05	380.33	378.975	383.661	355.037	391.664	369.754	352.966	258.864	455.803	385.455	348.433	517.672	613.258	504.283
92.7056528481239_413.214834005654__[M+3H-CH4]3+ 291.118_38	156.413	131.895	134.701	172.916	192.079	172.702	197.323	202.863	125.051	135.184	101.675	164.082	90.2166	161.29	282.068	214.225	205.545	249.222	138.85	98.957	91.8305	46.8016	140.642	97.836	105.767	183.685	148.108	179.805	204.832	230.347	65.8248	60.8484	92.2654	81.1072	62.0834	136.963
92.7240600584318_329.751299074628__[M+3H-CO2]3+ 319.13_68	4.26864	16.5425	30.7024	4.1472	12.6962	23.0339	12.3239	9.89783	4.76733	0.0583543	12.7873	0.0480593	18.3641	0.0549343	16.7385	5.56032	4.65879	15.5822	4.5147	9.83114	4.33536	13.9004	9.89477	21.6817	0.0597342	21.1689	5.70447	16.226	11.7984	10.5479	9.28291	5.01354	22.4345	23.5011	21.9386	14.2621
92.8230617169849_414.208380614569___38	51.1071	41.2692	49.0437	16.5538	50.72	40.2885	36.884	34.5833	66.638	44.8091	70.0805	31.6027	106.943	367.553	228.138	447.257	487.484	399.415	194.865	163.311	169.316	133.998	147.761	126.371	233.284	157.121	184.631	306.857	274.882	273.45	83.4438	205.763	160.077	105.982	70.087	92.5741
92.9355318818_414.246941498302___38	117.276	90.7886	119.891	165.745	95.099	100.002	85.9796	108.56	80.8961	125.272	63.7095	100.08	95.2913	339.608	292.964	476.767	477.25	127.197	108.603	91.6294	316.513	189.423	207.689	93.1147	165.988	177.252	113.965	178.412	318.773	291.436	269.694	123.102	141.253	178.149	150.51	85.453
92.9260064466391_434.293675458407___34	440.985	696.724	733.25	45.5243	63.3908	51.7988	24.605	59.395	52.3385	19.2046	38.2515	31.6021	27.926	6.00589	5.57246	33.3255	4.66146	19.4722	9.02478	13.2786	4.3379	18.7894	19.7947	4.33152	19.8513	28.5635	40.4724	5.47615	5.9749	32.0266	18.8011	0.0459168	11.3676	17.8632	13.327	0.0652299
92.9689481288063_1130.72945515922___220	467.375	555.962	422.665	354.145	416.089	360.848	358.235	272.862	293.954	380.202	388.524	363.02	589.489	655.797	569.964	424.973	447.906	461.002	437.008	491.471	448.235	434.337	547.426	537.019	541.074	504.611	792.85	536.164	480.119	423.635	759.238	647.659	570.762	884.96	931.631	700.115
93.047288197549_1090.00690085361___33	1573.63	1905.06	2357.17	1622.97	1332.72	2023.36	1599.16	1734.47	2100.73	1696.56	1477.67	2818.96	86.0828	78.1487	57.062	49.8773	50.8881	57.6853	62.792	38.7175	38.9247	46.0595	59.0555	30.1044	356.469	175.758	511.559	341.985	225.813	247.571	524.183	468.605	215.558	448.309	396.313	312.308
93.0334003083072_378.41261792663__[M+H-C4H8]+ 148.089_40	21.368	89.7345	98.3155	41.5078	37.6218	28.4265	73.9919	104.084	103.564	57.7476	44.7773	63.3637	32.1214	54.1069	39.1219	72.2924	14.0207	35.1361	87.488	52.4929	86.9592	46.3339	14.8837	56.4319	85.2971	56.5119	68.484	27.0778	17.7398	26.3267	78.2653	71.4369	61.9835	58.8756	48.3232	64.2577
93.072297201023_927.29990745409_[8][M+2]+__7	6518.41	8269.47	6037.72	5893.09	6863.78	6059.82	5669.18	5811.9	5079.5	7154.45	6108.51	5842.98	4805.7	4472.78	3614.38	4082.04	3545.88	3567.26	3519.57	3309.08	4728.76	4688.71	5004.68	4253.44	8005.12	9943.45	7969.59	7131.69	6750.31	5686.76	6503.14	6453.81	5284.42	10264.7	7326.76	8632.6
93.0723163393016_982.892922732294_[9][M]+_[M+H-C2H4]+ 120.098_1	7866.58	9294.07	7560.38	7144.14	7589.06	7319.74	6519.91	6922.62	6417.33	7948.95	7586.45	7315.84	5626.92	5787.64	4911.67	6712.56	4801.42	4966.38	5059.27	4399.73	5877.51	5804.55	6530.79	5301.73	7371.06	8126.76	7328.63	6868.14	6459.38	5933.59	6839.46	5955.81	5953.09	8974.89	7232.41	7482.63
93.0723935863198_885.827461662893___112	4803.07	5091.15	4152.05	3932.15	4336.18	4165.64	3854.16	4263.47	3735.61	4636.9	4331.58	4467.73	3216.36	2605.89	2152.68	2918.57	2106.04	2177.05	2219.41	2214.69	3653.99	3214.77	3564.57	2685.04	5279.75	7108.63	6101.98	5266.29	5272.4	3776.51	4017.32	5152.31	3830.96	7955.74	5809.25	6607.92
93.072298208813_619.561575234865___22	2791.38	2966.42	2417.03	3919.99	4991.31	3697.56	2822.42	2496.76	2343.63	2111.23	2462.39	2913.85	2191.27	1607.51	1722.15	2514.61	1503.51	1579.23	1238.93	1758.72	1416.25	1722.05	1709.37	1651.04	1870.03	2140.54	1366.76	1539.11	1181.11	1493.5	1242.47	1041.18	989.161	2000.65	1361.39	1187.69
93.0722728980689_799.044417868684___39	10938.8	14081	12173.7	1783.1	1511.93	1352.74	983.669	1035.34	947.599	871.78	1077.94	1138.54	840.058	879.376	820.68	6193.63	534.795	837.857	640.184	821.766	753.488	851.871	804.217	713.277	4802.53	6471.2	2632.6	3241.03	1601.21	4515.24	2229.38	960.956	1292.6	4728.31	2251.21	1206.43
93.072372285978_768.132886898584___45	1051.21	3470.49	2001.5	852.337	638.703	914.529	494.372	370.323	504.171	476.679	476.471	412.245	993.718	835.038	839.042	2444.32	364.779	483.085	302.754	591.048	455.384	630.457	506.565	680.356	5496.3	7354.34	1729.07	4078.85	716.221	2877.48	2149.25	753.584	1225.67	4693.35	1715.19	701.5
93.0724997383401_359.185992373538___65	898.796	1315.74	883.126	571.435	517.509	591.639	946.527	886.763	934.322	937.588	785.546	1011.86	709.851	596.358	686.145	971.367	399.189	658.843	544.169	880.308	570.733	620.161	889.613	797.42	1592.88	1965.32	621.969	1467.17	723.984	1491.39	1633.03	1507.48	1342.17	3092.58	1879.45	1878.82
93.0720799877058_280.111173807075___7046	138.41	142.136	217.697	75.5725	109.213	87.5048	224.364	299.438	303.716	284.849	352.885	359.517	242.002	161.735	212.093	313.276	125.597	220.402	130.539	192.602	181.953	147.802	259.601	266.901	348	457.41	153.736	311.836	94.1599	303.722	864.914	1059.03	838.792	5652.57	3391.76	4424.72
93.1633895114657_413.919691843997__[M+H]+ 92.1555_38	59.6249	118.38	128.74	164.413	31.7	63.3105	24.5894	74.107	71.3978	115.084	44.5427	68.3906	57.8132	139.847	164.619	264.823	177.45	117.745	95.6778	53.1117	91.9308	56.2742	60.2555	117.224	158.214	164.577	98.0831	141.507	95.4374	138.174	61.0186	76.0603	63.0814	166.675	66.5179	36.052
93.1575881271746_434.175741822178___34	471.092	577.623	634.325	20.9521	32.0951	75.7768	18.685	40.0398	43.3515	32.4096	6.45374	37.3242	32.5138	17.995	16.6965	27.7377	23.2782	7.77949	18.0239	9.94049	12.9976	0.0423771	14.828	17.3041	19.8155	35.6405	23.084	16.3988	5.96417	21.3118	9.3836	0.0459168	5.67346	47.55	4.43425	0.0652299
93.1913462826149_669.278151887811___799	29.7972	8.21854	12.2183	8.25827	31.6798	28.7422	30.653	24.7787	42.8166	31.9713	12.7135	10.5222	18.3492	24.0553	16.7484	35.7484	18.6932	23.4316	9.04712	13.1091	13.0154	18.5394	9.92722	8.66233	45.6168	49.2877	34.1855	37.8107	23.5714	79.1027	27.8358	30.0515	33.6326	23.5158	35.0907	28.4934
93.2260377921297_123.632668095913___7279	4.24241	0.0751286	0.0558956	4.11749	0.0579095	0.0525653	0.0559893	0.0451426	0.0434681	0.0583543	0.058061	0.0480593	228.684	312.153	284.059	0.0508358	0.042614	0.0356921	0.0413265	3.26239	0.0396735	231.538	0.0454262	8.63288	336.589	0.0645454	5.68416	0.049469	0.0539793	10.5284	0.0425389	0.0459168	22.4053	11.7533	224.738	363.437
93.3219146728516_120.666063543546___8313	0.0389307	0.0751286	0.0558956	0.0378092	0.0579095	0.0525653	0.0559893	0.0451426	0.0434681	0.0583543	0.058061	0.0480593	0.0419457	0.0549343	0.0509082	0.0508358	0.042614	0.0356921	0.0413265	0.0299218	0.0396735	0.0423771	0.0454262	0.0395657	0.0597342	0.0645454	0.0522024	0.049469	0.0539793	0.0482588	0.0425389	0.0459168	0.0513705	0.0539001	0.0402583	0.0652299
93.3754396895297_412.424665234359__[M+3H-CH2]3+ 291.118_38	104.784	208.588	165.084	140.711	120.289	114.719	36.8388	70.0345	52.9278	83.1151	12.7231	68.3903	27.7947	157.493	178.331	117.997	141.344	120.264	63.9904	19.8792	57.0187	28.0804	95.2104	35.0469	105.767	231.319	167.318	32.7818	125.19	101.732	18.7748	106.54	56.7767	47.5672	17.738	64.8939
93.388269493934_431.438798305591___4502	375.241	482.11	428.102	162.52	70.1829	63.7134	43.3352	84.5567	47.8871	64.4027	70.552	63.5413	54.7149	95.553	77.5304	38.6632	37.0616	54.1976	17.9507	45.5365	60.3966	27.618	59.0732	47.3432	71.325	125.249	67.9811	48.2943	64.406	73.2124	53.8089	84.6376	45.0308	46.71	60.9757	70.7033
93.5334075074246_978.868513082938___3903	59.3808	89.9062	85.011	328.664	132.102	85.777	237.186	224.669	113.591	436.938	157.725	225.697	54.8569	84.8567	89.7623	77.1988	74.8902	70.8537	36.3431	29.6928	59.9603	64.2489	68.8791	39.1619	215.969	327.432	137.142	223.096	444.065	127.372	117.574	495.627	398.154	144.109	98.0635	100.496
93.6068896659351_412.16073948852__[M+2Na+K-H]2+ 103.278_38	295.489	357.178	209.475	67.7061	69.6412	86.2253	52.7224	54.2778	42.7874	57.5412	63.6157	31.5648	150.123	127.686	139.723	170.543	103.845	55.2747	45.7941	33.1328	35.0884	56.1619	20.085	48.1896	79.325	204.487	46.1567	71.0272	47.7298	90.5876	28.1622	35.4949	28.3883	101.08	44.3451	57.6834
93.7557966677663_979.031279454552__[M+K+NH3]+ 37.7661_80	80.258	65.536	109.423	403.833	81.8825	182.742	244.132	200.136	137.344	436.841	243.786	313.84	68.3371	83.7921	101.158	66.1704	73.7733	69.9553	62.8027	29.7457	77.0918	45.8921	34.4738	65.6731	214.796	368.247	266.268	175.15	510.981	179.231	230.034	680.429	537.708	257.735	60.9818	141.298
93.8004104864864_373.925141884792___7796	17.1235	41.4686	6.1435	24.9454	12.7481	11.5567	6.17815	14.9021	23.9288	12.8571	6.40653	5.29069	128.574	433.183	614.506	66.8536	53.936	33.7622	22.6701	9.85674	0.0396735	4.64048	4.97156	30.4392	45.9133	82.014	28.6249	43.4192	35.5283	26.4045	18.6125	10.0456	22.466	29.4929	22.0001	7.14751
93.8356785426868_414.290956573028___38	149.063	202.375	320.971	84.8861	274.021	203.773	110.681	64.226	181.32	44.8096	134.517	89.0819	1188.56	5151.65	6978.99	7876.12	5718.46	1802.98	2686.55	626.27	3348.8	3265.6	3826.09	1685.27	5057.11	5265.63	4148.04	6922.39	5088.3	5930.43	962.86	4290.65	4484.57	1063.21	3226.47	5178.34
93.9855847173679_979.664964096463__[M+3H]3+ 278.926_1	67.9471	94.3144	75.9987	207.37	81.9933	45.8036	151.911	152.478	114.671	416.912	138.403	196.549	54.9202	47.9523	130.416	48.0927	92.4403	73.489	99.0751	52.1307	85.787	73.5237	64.0906	60.1481	171.392	224.069	160.622	145.625	207.419	138.229	177.943	412.195	362.782	180.383	80.4364	100.773
93.9742047180923_1126.22055763913___134	106.938	175.49	98.5846	157.746	158.09	145.471	123.595	99.2828	90.6259	122.402	127.945	136.994	192.113	228.049	193.837	191.659	204.638	189.791	213.524	182.9	298.778	265.287	203.97	161.81	222.203	316.517	142.979	177.757	148.159	143.263	269.503	250.596	235.599	342.778	236.293	292.559
94.0298368397126_373.547469350789___7797	34.309	24.979	67.9662	33.3201	25.5941	34.8096	31.0103	34.8348	28.8253	19.3259	25.6727	53.0003	164.018	244.235	252.753	61.3882	70.4724	62.2099	27.2527	49.3742	52.3435	27.8984	34.8727	52.2782	79.0401	118.42	34.4812	16.3449	59.445	58.3056	51.3932	55.4417	56.3576	65.0203	44.0783	57.3978
94.0747005638395_982.710626738537_[9][M+1]+__1	429.98	895.53	578.98	370.358	804.182	533.447	526.935	467.178	505.561	922.665	629.852	318.17	438.688	582.309	515.354	610.578	371.386	302.458	337.464	375.868	379.634	535.858	555.658	402.505	682.648	721.956	506.53	485.073	575.369	448.104	548.724	442.821	469.751	759.217	451.672	751.103
94.0745508762998_927.048077416512_[8][M+3]+__7	362.524	812.717	507.299	461.15	770.675	675.098	530.091	498.598	458.912	660.981	770.131	620.714	628.579	512.707	285.902	512.007	354.156	357.061	329.045	320.749	515.289	482.995	467.045	459.654	645.407	876.928	746.293	579.393	677.505	591.177	512.302	478.433	440.76	761.417	509.72	872.593
94.0649834207011_1091.50604953234___33	2486.55	2782.58	1857.85	1702.02	2132.63	1574.45	2960.65	1931.39	1898.5	2438.67	2224.67	3044.4	463.073	387.814	392.518	342.637	335.99	354.373	364.882	381.733	310.799	254.462	414.457	422.303	1012.56	675.124	801.015	916.243	729.503	499.883	538.035	765.526	787.722	665.71	603.286	867.258
94.0491977673097_121.996042783462___7280	25.5653	0.0751286	30.5493	4.13908	0.0579095	11.5391	0.0559893	24.675	9.50332	6.38699	6.36606	5.25868	18.3369	0.0549343	0.0509082	0.0508358	255.071	0.0356921	269.79	16.3532	0.0396735	260.887	0.0454262	0.0395657	6.52271	0.0645454	62.6668	582.372	5.90604	15.8763	253.392	270.88	16.8448	352.657	0.0402583	21.3756
94.0751987667151_786.166386631374__[M+3H-CH3]3+ 294.235_21	1033.01	1293.07	1012.99	195.901	221.358	172.271	146.744	161.998	146.955	152.78	205.102	157.361	196.944	156.385	106.299	405.848	129.865	168.114	117.794	149.774	104.187	144.473	104.381	121.687	272.797	464.751	307.127	316.795	194.199	398.701	191.454	185.969	240.005	454.099	333.504	192.068
94.0748701136836_629.441147686887___63	280.628	217.475	223.72	421.355	450.921	406.538	266.373	169.731	251.275	229.635	177.642	300.942	201.421	214.561	124.251	197.036	170.242	224.402	128.255	163.21	155.674	178.129	150.611	158.054	158.498	235.262	236.25	202.033	196.669	165.474	136.137	146.742	113.208	224.51	168.665	129.809
94.0708503720291_1200.60267118567___8375	0.0389307	0.0751286	0.0558956	0.0378092	0.0579095	0.0525653	0.0559893	0.0451426	0.0434681	0.0583543	0.058061	0.0480593	35.6125	12.2035	28.2947	16.8453	9.47278	11.3544	9.18658	0.0299218	13.2096	28.0844	14.9903	17.6042	0.0597342	0.0645454	0.0522024	0.049469	0.0539793	0.0482588	0.0425389	0.0459168	0.0513705	41.4981	0.0402583	0.0652299
94.0651643801542_414.268556447852__[M+H]+ 93.0554_38	201.612	370.744	283.455	246.42	236.096	323.6	173.092	183.038	195.852	215.587	178.387	168.556	5164.12	5503.87	5530.83	6732.1	4659.81	5843.02	3370.04	3846.74	3297.68	2818.15	3268.19	2485.65	4262.1	5049.23	5789.12	5626.9	6606.91	5065.07	4228.49	4542.14	3700.23	3886.33	2077.88	4393.6
94.1757808518509_406.661186621688__[M+Na+K]2+ 126.398_66	314.63	261.375	260.218	105.957	211.818	161.889	154.413	226.284	204.371	214.616	194.75	85.0289	110.004	236.629	272.796	318.468	308.212	100.418	157.183	75.5695	90.8454	41.9166	138.171	69.133	156.275	141.526	204.791	260.43	188.728	273.188	68.1489	226.527	200.646	158.348	174.352	105.793
94.2120265017058_979.173673838306__[M+H+K]2+ 148.454_1	72.0843	163.627	73.6796	180.762	62.9055	57.1847	113.766	103.021	47.3279	226.544	119.871	200.315	86.9652	42.4283	140.254	77.2912	65.529	55.1084	49.9717	32.9931	67.154	55.0705	93.4788	82.6751	111.962	234.899	103.667	98.1302	172.871	47.8024	111.337	323.718	170.453	125.952	40.1693	93.3177
94.2658638359348_373.190950923085___7798	12.9209	24.979	12.3855	4.18291	6.39852	11.6032	6.21648	9.99624	4.81517	12.9139	25.7914	0.0480593	249.049	201.135	363.9	67.2666	32.8871	23.6108	18.2455	19.8355	13.1122	4.67007	4.99193	4.36576	33.0097	63.9001	45.9749	21.7932	11.889	15.9015	23.3605	10.1237	11.3195	23.6913	17.6662	0.0652299
94.2950213629684_414.11239583593___38	369.735	392.787	350.852	295.244	340.344	266.088	265.669	215.689	204.209	140.84	204.877	287.331	2970.43	3727.71	2749.12	3135.37	2961.09	3512.75	1815.6	1656.59	1787.43	1618.63	1375.28	1400.98	2008.14	2422.84	1936.53	3415.9	3351.41	2617.89	1815.32	2206.46	2414.25	1791.29	1503.76	1880.77
94.5202404029675_414.097611760458___38	186.853	185.5	161.492	113.723	253.255	136.97	128.41	132.051	80.9175	128.027	89.1933	95.1984	1379.53	1927.53	1349.04	1317.02	1225.38	1957.82	765.601	747.291	650.862	597.731	920.871	509.309	1380.04	1038.3	1038.22	1422.33	1589.15	898.962	890.617	988.663	967.693	869.96	525.91	835.65
94.7477627674888_414.211887979159__[M+H-CH3]+ 108.764_38	53.645	99.0421	104.218	83.6565	50.7195	97.8889	40.5463	39.4762	71.379	57.6123	63.7095	68.4759	966.669	630.571	750.457	829.781	746.959	897.07	551.614	513.058	539.042	377.934	461.822	361.222	737.09	725.904	822.177	1134.38	899.734	713.579	694.217	563.62	538.53	506.589	369.743	515.968
94.9645249658081_475.198469875782___10	278.705	107.464	232.82	155.346	102.947	110.487	62.5118	84.1415	142.43	345.327	64.7385	179.799	200.513	161.883	121.607	165.838	133.132	197.95	85.7019	202.065	123.456	106.439	140.125	125.729	284.489	258.963	169.654	378.54	141.195	260.027	353.379	211.762	183.327	378.996	353.41	156.168
94.9685610069971_1192.6857029214___193	200.883	0.0751286	0.0558956	0.0378092	149.962	138.242	0.0559893	0.0451426	0.0434681	0.0583543	215.508	0.0480593	264.103	152.135	431.279	287.332	137.374	160.867	299.096	268.366	294.84	291.984	320.744	321.261	0.0597342	0.0645454	0.0522024	0.049469	0.0539793	0.0482588	0.0425389	15.1428	0.0513705	0.0539001	70.7665	0.0652299
94.9759081222071_414.288384162447__[M+3H]3+ 281.91_38	102.215	66.0281	116.479	86.9111	69.7393	57.5817	55.3406	24.7023	66.6204	70.4151	31.8548	73.7433	156.514	389.907	235.921	345.781	493.61	323.3	252.247	262.241	334.465	318.509	281.517	260.21	395.878	294.836	304.743	357.299	456.514	391.015	261.614	414.876	276.442	376.31	205.643	426.866
95.045861651292_130.261359863012___125	3461.61	2694.32	2923.14	2955.64	2090.78	2134.12	2177.25	2322.46	2521.9	2264.93	2258.17	2712.1	4717.11	4648.72	4511.67	5350.99	2791.96	0.0356921	3351.94	4154.07	0.0396735	3044.05	3868.79	1738.6	3769.18	3203.44	4285.24	3228.82	2552.75	2899.93	4434.92	2871.08	2962.85	4764.55	5206.72	3658.22
95.05148915264_346.731109801075___201	3423.07	2838.14	2802.28	2790.16	1944.99	1676.22	1750.62	2288.53	2319.86	2290.88	2312.93	2746.8	2816.51	2045.23	2152.83	1755.59	1331.6	1713.45	1387.84	2108.13	1480.55	1869.63	2350.64	1946.66	2768.33	2935.89	2920.13	2307.04	1986.74	1783.68	3079.56	1953.1	2044.95	3280.11	3136.88	2635.84
95.0618104117569_1087.98401673919___33	8733.26	13757.8	13885.6	8625.84	11394.2	11291.5	11309.8	10810.1	12201.7	14114.3	13047.1	13115.5	337.286	253.84	281.761	152.061	209.184	120.198	246.012	112.872	183.527	231.529	191.263	288.433	1825.29	1128.11	2697.45	1630.08	1223.48	781.86	1689.34	2795.04	1466.02	2401.59	2016.77	1179.37
95.0878022718943_926.705364760776__[M+H]+ 94.08 [M+H-CH2]+ 108.094 [M+H-H20]+ 112.093 [M+2H]2+ 188.16_7	39607.6	44606.3	32637.1	30656.8	31658.5	30158.9	28072.1	30835.8	28342.9	37163.9	31794.9	32959.9	28299.4	25582.2	21572.6	20233.8	19274.6	18371.4	18446	18604.6	27168.2	25724.2	27478.7	23665.6	45622	49529.2	43542.9	37241.7	36672.9	31188.8	34760.2	37193.6	28729.2	55223.8	42412.7	43616.6
95.0878608245796_982.602385381009___1	41896.3	45255.5	37929.9	37318	36498.8	33393.1	31986.2	34667.5	32841.8	41026.8	35786	38839.1	28418.9	25593.4	22336.6	28125	21920.6	22441.6	23211.1	22803.5	26493.7	26750.7	29732.7	25292.6	33461.5	36517	33576.9	31033.8	30247.9	26201.4	33759.5	28193.5	26643.8	40689.4	37925.5	35732.7
95.0879203215439_618.214877359879___22	7533.54	8653.63	7048.53	7582.96	6642.16	6512.38	6561.34	6496.91	6754.88	7276.4	6942.18	7813.44	13392.1	10964.5	10655.4	12164.8	8717.52	9873.6	8359.17	11674.4	9157.12	10622.7	11420.1	10973.3	9324.34	9519.65	7159.85	7343.53	6182.35	6932.85	7738.84	6368.75	5959.55	10805.6	8293.62	8131.5
95.0878786770501_883.618211430234_[10][M]+_[M+H-C2H4]+ 122.112_112	14849.1	12528.5	12394.2	13558.9	14012.7	12369.2	12269.3	13095.7	11805.1	15146.3	13252.4	14171.2	7711.24	7242.49	5836.91	7247.22	4800.11	5670.02	5913.2	6098.27	6881.75	6892.65	9063.84	5990.41	14760.3	18568.3	17695	15995.6	14481	12974.3	12056.8	14915.4	10871.4	23401.2	18457.9	18687.3
95.0880371206095_564.233499479418___53	3355.31	4344.33	3166.33	3399.52	2698.2	2772.75	2990.09	2779.61	3264.15	3477.19	3300.15	4016.26	6778.2	5016.37	5186.94	5755.72	4178.48	4786.67	3967.37	5733.85	4326.04	5339.7	6057.24	5455.55	4672.62	5707.6	3981.18	3855.6	3199.86	3578.66	3948.58	3133.33	3572.25	5391.08	4214.41	4321.43
95.0877898282801_769.397723240011__[M+3H-CH3]3+ 297.268_45	3577.16	19227.7	8806.04	5286.3	4064.05	5105.37	1921.38	1635.42	2166.5	2182.99	1848.53	2690.2	3274.81	3215.39	2890.71	14476.4	1960.16	2918.02	1992.69	3221.92	2087.84	2936.17	2655.28	2607.24	29376.9	39855.9	5842.03	21594.9	4402.04	17006.2	13324.3	3507.04	6469.58	30604.6	11060.3	4602.25
95.1611324753447_326.689031368043___2917	25.5662	33.0391	24.5568	24.8384	31.7405	34.5496	24.643	4.94222	19.0483	12.8039	12.7851	21.0949	0.0419457	6.0875	27.8978	16.894	14.1774	19.7367	22.8799	13.3094	17.5915	23.465	5.01895	13.1784	79.2986	187.956	149.769	79.1291	146.676	107.067	77.0233	91.7128	62.6425	107.14	106.668	44.5192
95.1836693457072_475.592002714631__[M+H-CO2]+ 138.167 [M+2H-H20]2+ 206.365_10	215.106	292.026	320.474	149.171	183.444	193.333	166.047	185.171	213.446	542.095	196.181	114.027	195.167	273.751	249.99	324.846	339.11	164.687	217.04	128.708	264.434	191.291	138.186	198.742	468.004	351.679	601.356	494.305	597.438	437.633	356.242	481.032	413.105	517.421	776.68	484.221
95.2057280098487_414.297502064746___38	145.179	57.7746	104.218	70.2684	38.0396	57.5817	73.6968	74.0179	33.3102	44.8096	38.2257	31.6043	230.138	218.66	240.803	276.003	185.041	212.134	158.787	171.798	176.766	122.341	145.665	152.076	146.459	162.643	268.347	112.85	206.835	211.593	140.535	229.522	151.386	170.452	92.3889	99.6951
95.2432380552602_981.965424820855___1	184.437	174.506	146.059	181.076	239.616	126.032	139.877	177.591	184.979	136.823	132.78	196.208	114.05	131.495	119.959	194.012	80.8873	69.8258	68.5251	143.656	155.647	154.975	110.404	151.702	85.6428	198.395	172.497	163.636	172.427	117.374	151.89	106.252	156.81	206.626	137.663	200.897
95.2426291121682_925.8090451536___7	183.113	207.966	121.74	147.129	142.799	131.586	98.1682	154.158	118.214	139.379	136.85	157.51	147.707	133.732	100.73	89.4456	121.013	63.0196	59.5003	79.5203	66.2519	134.827	74.915	125.8	161.306	253.334	184.116	154.523	214.148	184.193	158.581	173.148	157.02	279.718	298.841	235.884
95.3162409411372_415.274592565965__[M+Na]+ 72.3263_38	88.4412	90.7886	147.131	28.934	31.6997	23.0327	42.9898	39.4762	38.0688	38.4082	57.2704	5.26738	110.887	121.461	113.031	89.909	94.4726	70.0422	58.6875	32.1565	90.2948	32.3591	64.2903	43.8114	191.894	188.372	102.568	118.924	123.871	134.867	27.7739	50.2018	50.4681	64.5118	39.3674	78.3319
95.3895862203807_325.640325490641___2918	17.4869	8.25985	12.2619	16.767	6.34809	23.0341	18.4347	15.0132	19.0483	12.7886	38.2578	36.9164	13.9259	30.0038	33.4315	11.2424	18.6349	11.6708	9.02191	19.8857	0.0396735	18.7341	14.846	4.33054	79.3862	155.735	157.782	115.992	95.618	73.8169	9.3847	73.6445	63.8111	47.6278	17.9749	79.4602
95.4142722158663_475.577658059787___10	165.982	167.258	263.263	139.777	169.407	167.277	120.578	220.679	139.81	285.378	168.914	136.284	148.574	215.896	228.917	189.491	249.367	250.38	105.219	223.306	181.593	100.446	291.283	147.222	313.395	378.761	362.335	453.964	433.501	410.833	172.716	486.735	421.725	283.01	210.201	290.839
95.433599324233_414.097611760458__[M+Na]+ 72.4435 [M+2Na]2+ 144.885_38	154.432	98.9173	153.872	45.4678	70.4873	91.9771	67.5554	34.5417	61.7734	51.1482	44.5967	31.5649	116.033	158.038	84.6131	214.651	160.183	81.5596	123.647	75.6787	79.1121	79.5802	80.8788	65.8365	170.391	174.225	185.438	157.39	161.496	131.558	64.9007	122.256	103.927	177.08	88.0178	110.291
95.4787055197517_981.774765168371__[3M+H+K]2+ 50.3352_1	192.327	217.231	200.857	168.339	144.736	163.751	171.961	149.58	164.694	193.367	234.692	136.965	184.935	107.598	121.022	182.007	110.929	116.551	107.668	161.317	132.821	153.894	152.458	116	189.475	262.357	170.199	174.309	223.595	127.575	175.733	154.393	148.819	238.554	151.621	215.552
95.5848599624574_982.567804221776___1	161.776	258.831	151.987	180.161	255.544	289.3	182.985	184.073	145.183	263.489	257.762	121.086	268.432	81.1682	177.923	177.383	98.5966	93.7642	107.554	93.1156	155.27	159.336	189.077	198.838	177.874	260.87	219.303	190.908	158.752	223.662	213.215	217.765	104.807	326.362	157.235	292.05
95.5849676474631_926.332073234091___7	166.472	216.432	169.993	184.488	100.444	173.514	126.74	127.375	140.405	212.566	170.156	177.227	115.871	146.972	147.475	94.9799	112.09	66.7564	122.067	69.8048	182.331	167.758	156.49	47.6355	288.011	213.591	257.82	250.553	213.127	149.926	182.721	157.463	113.311	364.819	183.181	253.304
95.6121835923964_325.499637466484___2919	8.64493	57.8189	12.2619	24.8714	31.7404	28.7926	30.7617	9.89747	21.341	38.4118	25.5366	15.8213	0.0419457	24.0031	22.2877	16.6547	9.31745	3.89028	9.02191	9.82013	13.0031	9.25073	14.846	12.9916	138.953	81.0601	109.77	85.0686	98.8101	155.433	32.906	72.7848	44.8115	23.8139	13.3324	57.7893
95.6439917096926_475.272247170913___10	273.371	173.596	266.877	175.169	148.28	125.23	156.578	145.198	62.9609	197.172	116.529	123.256	219.265	132.331	149.993	211.502	160.592	202.733	61.8753	159.937	200.664	90.3022	146.259	136.701	212.242	189.753	216.999	320.739	251.923	185.246	505.656	369.203	147.416	335.089	315.716	107.644
95.6563487659554_412.892263636042__[M+2Na+K]3+ 202.032_38	119.102	57.704	104.087	66.135	75.9722	45.9868	36.8391	39.4747	80.8206	76.7216	44.5427	47.3472	233.617	183.645	198.887	286.167	179.097	209.918	114.179	102.712	126.818	134.606	140.98	176.237	210.512	85.7603	129.387	240.665	182.432	144.632	79.7936	141.98	156.266	124.954	70.9524	162.178
95.6927551588822_981.971251441541___1	139.42	254.586	123.786	115.829	88.2323	208.394	152.124	155.148	120.531	178.014	214.222	111.799	95.8329	127.059	99.5593	66.0944	109.759	153.549	147.184	103.105	124.251	135.853	134.039	172.375	190.643	170.801	206.123	232.117	240.746	100.866	201.21	95.364	174.246	241.791	158.482	157.847
95.8039994938808_926.91116835601___7	266.779	97.7675	121.445	229.312	196.286	110.523	139.848	200.942	151.665	69.6035	84.037	206.251	147.553	118.469	168.142	44.5883	91.4491	136.737	49.7789	99.0224	134.296	92.6933	109.846	143.454	338.314	323.961	300.286	174.835	190.151	153.579	125.223	252.785	151.335	337.866	269.014	260.32
95.8770352453411_413.585551176567___1743	51.0435	107.165	85.7191	112.763	25.3241	57.4835	83.3406	78.9495	66.5581	89.5085	44.5427	57.8687	130.793	210.431	183.352	168.593	182.772	195.177	153.468	49.6992	141.961	107.477	95.2341	21.9448	110.961	90.232	86.701	118.311	173.081	99.4291	61.1299	151.309	146.305	106.931	62.0834	82.3193
95.8760297035991_475.031170772309__[3M+2Na+K-H]2+ 35.9362_10	140.743	90.9312	104.294	78.7585	108.129	81.8687	68.763	74.2425	38.1704	102.677	25.8954	42.8718	190.731	159.665	128.041	128.908	74.6581	111.057	49.699	92.5197	95.2424	41.6499	104.195	47.7048	99.4842	112.783	189.743	185.844	223.234	122.905	238.371	164.793	91.8511	186.047	135.957	202.547
95.8849310802248_982.066942459802___1	165.887	124.471	139.973	113.669	251.332	226.239	136.789	127.956	146.165	324.088	174.46	157.166	154.555	59.859	99.6835	104.649	94.1592	93.2411	147.884	148.592	165.807	101.172	148.703	77.2439	111.994	132.471	89.7821	109.09	207.501	85.0397	170.369	101.372	62.1338	143.228	152.549	158.203
95.9327176899414_982.203580793809__[M+H]+ 94.9197_1	91.1327	253.863	217.859	201.031	182.767	121.367	153.855	144.922	137.319	158.706	126.267	171.299	215.004	154.367	99.4586	132.189	115.227	128.319	125.464	87.5409	56.3656	110.885	161.313	72.7783	141.161	165.411	190.056	196.016	101.704	107.001	127.061	131.741	82.8479	180.29	214.219	107.776
95.9564169740952_1121.37314484172__[M+Na]+ 72.965_134	76.2304	431.9	177.363	61.6859	422.452	389.535	341.745	113.209	56.6767	343.25	315.596	73.1379	297.639	1110.3	1117.44	1011.14	960.02	464.68	779.681	339.385	710.582	773.11	788.049	613.268	307.389	384.284	350.458	351.898	338.91	280.841	489.203	300.046	307.975	416.768	485.741	331.973
95.9666010332288_125.564691180374___125	80.4891	65.5119	103.257	28.767	31.4928	74.3466	54.8515	63.668	28.3376	44.3785	31.65	62.6459	1319.74	1422.04	708.14	1225.03	975.33	917.325	0.0413265	542.219	676.823	549.184	892.212	113.566	167.792	154.157	413.521	386.246	181.933	407.019	60.0266	140.199	61.386	305.636	782.247	375.921
96.048910545592_124.483098274087___7240	173.656	147.351	139.727	147.937	119.865	102.927	97.6699	117.703	130.422	95.2232	145.883	162.294	531.403	0.0549343	270.357	0.0508358	0.042614	0.0356921	0.0413265	29.3008	0.0396735	0.0423771	255.599	0.0395657	758.391	412.813	147.506	145.252	146.979	0.0482588	655.316	330.313	367.306	0.0539001	0.0402583	412.368
96.0912109444186_926.714480457178___7	3307.32	4238.39	2969.51	2696.69	3045.28	2700.29	2348.25	2940.98	2543.54	3248.08	2744.16	2850.41	2386.94	2400.95	1868.41	1848.11	1945.41	1637.45	1791.12	1569.58	2502.94	2178.28	2603.47	2191.85	3950.4	4245.04	4009.29	3177.37	3539.22	2469.75	3119.56	3264.4	2396.72	4687.77	3644.94	4000.84
96.0910857733027_982.572977858093__[M+2H-C4H8]2+ 246.236_1	3386.93	4458.03	3864.18	3420.79	3353.43	3150.85	3088.58	3155.39	3305.24	3540.27	3321.75	3615.4	2547.95	2393.78	1871.14	2591.42	1873.96	1934.74	1935.35	2015.39	2368.61	2456.59	2688.62	2159	2707.91	3228.27	2821.2	2754.57	2582.7	2337.49	2608.7	2335.41	2303.78	3646.93	3397.4	3082.11
96.0912161914064_618.123686919808___22	676.977	680.196	694.252	683.52	526.312	552.136	569.77	416.697	518.558	628.178	420.983	572.442	1056.22	983.029	811.662	917.596	686.887	893.829	800.884	1096.95	854.647	894.76	928.539	909.042	896.926	953.074	571.685	778.106	521.935	539.678	584.617	590.809	468.235	999.994	743.663	583.749
96.0762541237987_1089.10320312741___33	4001.1	4454.27	4707.12	3120.66	3680.17	3047.93	3975.66	3309.88	4848.36	4642.18	3886.22	4767.21	93.5634	136.441	129.954	136.659	837.527	135.058	89.9145	84.8035	73.9354	177.366	103.597	165.858	942.889	379.883	822.085	563.161	489.985	361.678	730.779	752.835	443.717	766.637	658.625	330.342
96.0910676070446_884.327020276234_[10][M+1]+__112	1265.26	1378	1046.58	1107.42	1097.94	1094.99	1163.59	1237.09	861.389	1375.97	1211.46	1305.66	788.259	478.401	612.216	823.197	455.512	515.568	413.694	586.35	812.069	685.171	752.47	696.359	1413.82	2116.88	1728.96	1489.33	1218	1171.56	978.303	1659.4	1067.5	2303.01	1677.38	1962.51
96.0907368512326_562.767458980763___225	314.254	393.161	245.589	353.109	270.667	201.483	228.02	246.9	289.902	308.569	381.305	357.129	576.275	390.316	362.475	466.244	310.34	510.29	254.927	554.101	519.974	514.036	561.962	455.605	341.412	552.299	330.811	367.582	241.236	224.318	343.754	200.628	304.463	385.707	413.064	317.516
96.1001503309706_123.027469433888___7281	4.26118	8.2358	6.10987	0.0378092	0.0579095	5.75302	12.2564	9.86998	4.7502	6.38699	6.36606	5.25868	0.0419457	0.0549343	0.0509082	300.373	0.042614	0.0356921	229.725	333.734	216.93	230.75	0.0454262	4.32682	0.0597342	0.0645454	11.394	0.049469	0.0539793	0.0482588	13.9455	5.01505	5.61493	5.8906	4.40625	0.0652299
96.2314943020082_982.752247283793__[M+H]+ 95.2254_1	144.358	180.161	134.359	127.527	189.069	206.457	158.587	132.8	213.755	139.363	162.198	159.023	127.688	119.718	105.221	148.712	151.191	135.512	134.425	81.353	144.221	137.866	157.569	129.89	197.678	192.379	181.798	235.659	173.693	188.767	136.791	146.942	214.244	234.158	151.067	158.072
96.2531317126919_1019.86886114185___27	29.9362	149.912	95.454	20.7648	38.4148	162.996	61.689	44.7191	33.4389	19.2812	19.2098	80.82	364.31	89.9984	255.872	16.4587	46.5929	26.7182	22.2378	29.4247	68.5289	72.9244	68.2569	47.7407	154.983	327.227	119.835	59.521	70.9564	111.944	69.9045	33.6221	72.9118	88.7338	70.3041	121.206
96.2651902855952_925.900210181734___7	84.9732	204.13	85.0034	142.539	81.6185	74.2818	115.524	107.597	66.1211	77.7683	82.5257	63.1154	196.239	84.6191	167.883	64.0405	58.3653	86.4307	61.3672	87.1948	94.5217	79.6002	84.9037	112.248	176.926	169.278	157.443	79.7433	112.449	111.194	135.927	210.246	90.3148	266.118	98.5618	199.414
96.4839441438456_924.672982755239__[M+Na]+ 73.4955 [M+H-HCOOH]+ 141.471_7	114.795	176.818	78.9425	69.9999	56.4328	34.2854	109.446	46.6949	51.9657	63.2871	117.025	62.6489	144.321	114.678	188.639	39.0388	66.278	83.3647	78.2441	66.0633	60.5721	106.077	59.8696	98.9518	273.134	154.687	116.599	83.9794	126.205	105.733	128.949	221.85	164.642	264.578	146.612	132.784
96.5697394622034_414.270109295893__[M+Na+3K-H]3+ 150.839_38	136.313	156.619	177.561	119.193	94.9872	91.9771	110.545	88.8215	104.54	63.9353	50.9676	84.1731	148.522	201.015	197.431	171.377	133.118	167.915	175.358	122.951	109.474	107.481	109.133	147.072	295.729	278.708	322.357	152.896	128.939	129.023	122.652	118.107	124.91	181.552	128.797	138.726
96.6781946846868_414.293528983609___1744	63.8072	115.549	79.6962	20.6672	31.6997	40.3072	18.4242	24.6726	23.793	38.4082	38.2257	31.6043	137.589	143.702	164.391	242.624	141.584	116.592	94.5434	61.4174	112.529	79.4511	48.4312	84.2139	91.4017	98.6086	110.834	132.814	146.912	129.01	139.19	75.1174	101.129	46.9743	144.421	171.39
96.7980082170285_414.211887979159__[M+Na+NH3]+ 56.781_38	206.695	82.4311	116.333	45.4678	63.3248	45.9886	55.2726	54.2798	61.7734	51.1482	38.1803	31.5649	158.022	148.684	133.607	154.381	108.768	78.8059	86.8423	127.001	121.207	106.207	160.164	100.071	212.017	147.19	265.829	205.254	124.389	63.1466	158.867	135.041	146.093	160.646	147.266	98.5383
96.9081280577573_413.502309899684___38	42.5892	82.5383	85.8266	37.2461	69.6573	63.2343	36.884	54.3452	42.7662	19.1806	25.4838	36.8257	55.6958	42.6396	84.6131	101.327	125.549	35.5269	64.1122	63.0702	35.1609	28.1371	30.1278	17.5564	72.715	106.713	34.6176	71.0437	65.6132	79.9266	37.0861	131.191	96.5211	88.0767	56.9457	50.4728
96.9256286994692_983.083374571297__[2M+3Na+K-H]3+ 91.9337 [M+H-CH3]+ 110.935_1	84.5232	184.367	103.332	100.407	76.5897	99.3571	79.1946	182.342	133.772	208.435	109.485	243.082	102.002	59.7703	144.513	33.0139	50.7826	42.6713	139.899	91.218	89.4734	121.288	183.842	226.972	83.6212	199.199	100.702	119.86	147.868	95.557	129.701	130.221	90.2536	148.384	166.578	266.434
96.9719331327599_1124.34583815448___134	690.444	2007.75	1322.98	510.299	1598.15	1580.64	1520.75	937.196	560.531	3570.99	1549.28	176.196	1566.18	2171.69	2325.46	2586.38	2173.68	1242.9	1801.97	1195.81	1773.61	1665.53	2054.53	1905.48	1474.75	488.228	1422.99	1206.26	1190.19	801.703	392.009	1072.67	972.465	1720.42	1846.44	1278.72
96.9640483682611_1191.90504832994___8130	4024.36	4118.08	2420.39	2833.58	2930.59	2575.22	2509.97	1813.36	1786.04	2868.37	2812.25	2135.9	5295.58	7470.54	7028.59	6532.14	6117.6	4049.33	6071.4	4477.05	4547.99	5689.5	5699.19	5487.33	980.746	3304.23	0.0522024	0.049469	0.0539793	2867.1	0.0425389	29.233	2676.95	0.0539001	3011.73	3607.56
96.9593214913052_122.409526667109___7243	104.14	91.39	35.6091	428.513	188.593	22.3358	170.649	206.602	36.9402	145.7	202.56	307.355	3603.59	6990.36	0.0509082	0.0508358	4326.81	4768.79	0.0413265	0.0299218	4471.47	4659.73	0.0454262	0.0395657	6167.01	2296.93	0.0522024	6345.21	752.581	0.0482588	0.0425389	0.0459168	0.0513705	0.0539001	0.0402583	0.0652299
97.0306920133009_404.124066367206___66	3252.34	3459.78	2975.87	2412.19	2294.95	2281.44	2193.34	2274.98	2025.54	2021.34	1721.4	1964.76	2807.81	2843.1	2875.14	1500.72	1932.47	1655.32	1086.65	1393.35	1531.48	1374.8	1805.03	2090.31	2114.21	2786.38	2166.44	1726.8	1792.41	1731.7	2268.43	1590.35	1465.94	3741.82	2420.12	2075.98
97.0281648820403_128.051535919693___125	1023.21	958.073	966.227	2184.1	164.405	1500.42	2094.74	1645	1554.89	1783.05	2142.9	2069.32	0.0419457	998.385	3869.89	2846.2	1160.85	0.0356921	3134.24	2528.47	0.0396735	0.0423771	3149.06	2407.98	1827.34	1310.82	1726.28	2432.95	1536.29	2185.22	3087.02	2894.39	2404.66	5039.44	2434.36	2239.79
97.0305277639411_333.718490246366___68	6754.49	6555.44	6827.95	3888.5	4038.07	4100.2	3197.89	3358.19	3451.04	2240.55	2211.17	2254.96	1460.13	1807.48	1455	955.438	647.712	810.165	547.396	671.7	675.969	512.656	673.421	733.09	1164.27	1356.72	1350.59	893.51	893.472	728.255	1115.12	1098.8	853.326	1828.3	1074.1	1254.08
97.0306479184271_259.449595770046___123	4226.85	4456.52	4185.51	2880.82	2867.28	2855.36	2260.46	2636.2	2577.1	1695.36	1533.15	1821.86	429.505	470.017	375.61	754.375	708.563	617.434	720.609	916.524	716.896	664.707	728.272	784.303	736.46	697.352	668.578	623.929	532.711	763.637	869.05	780.091	501.813	1241.8	878.382	804.528
97.0306660759427_290.45066486883___7210	1304.82	1681.05	1360.52	6418.08	6569.6	6390.29	4872.14	6020.07	5509.64	4649.31	4536.14	4259.06	338.025	257.83	402.51	654.596	759.125	963.805	950.948	1248.28	722.725	690.342	835.893	966.495	490.963	703.842	823.595	650.933	664.608	918.196	1105.85	772.607	957.551	1504.73	1112.85	1078.96
97.03081081619_456.687416912402__[M+2H]2+ 192.045_37	2788.72	2246.37	2167.42	858.936	763.308	932.796	904.437	1116.55	1264.13	786.459	910.16	923.543	1067.13	869.821	664.823	455.914	615.301	462.477	284.027	492.57	435.578	404.747	450.166	593.438	764.899	1441.52	1341.19	832.246	438.643	637.382	1610.95	778.282	730.709	2759.78	2963.72	1766.11
97.0310428923451_484.725587583443__[M+Na]+ 74.0391_110	1207.58	1147.66	1250.06	695.435	841.205	767.335	634.9	595.639	738.242	736.649	704.104	654.91	486.741	571.986	515.441	383.797	525.778	375.949	311.064	347.545	362.95	324.115	321.885	391.573	509.712	591.725	404.419	554.79	497.226	434.991	910.286	629.951	523.322	1839.48	1534.88	1558.25
97.0775448402973_1086.89018453311__[M+Na+K]2+ 132.197_33	39333.8	40481.4	38199.6	35508.4	31896.5	31340.7	30701.6	30080.1	32173.7	34202.6	34596.1	36050.2	3433.64	3338.21	2760.86	3795.66	2924.09	2466.71	2917.13	3331.85	2811.1	2979.65	3001.18	2838.5	15188.2	12661.1	15842.5	14513.3	15351.2	11503.6	13153.1	15354.9	12983	15563.1	13409.2	17307.2
97.1034817922343_891.079070407863___4	10298	13821.8	9223.11	9401.86	10063.8	9718.7	8378.12	8892.09	8230.21	11000.2	9508.81	9983.67	5782.89	4772.43	3735.14	6113.85	3967.51	4487.37	4168.59	4327.59	5783.07	5878.73	6601.65	4795.24	13187.5	14395.3	12376.9	11719.3	11159.9	9638.13	11345.9	10889.3	8466.65	17067.7	13308	13364.6
97.1035492214573_928.923760117881___94	15301	16726.7	12453.6	12483.1	11885	11058.3	10942.5	12248.7	11151	14754.7	12703.2	13141.7	10048.6	8180.18	6786.7	8270.92	7236.87	6998.61	7093.16	7493	9817.02	9227.99	10757.1	8606.02	18542.3	20091.9	17689.2	16052.7	15811	12979.6	15099	14670.1	11740.5	23202.8	17278.9	18403.5
97.103445859202_982.708978757987__[M+H-CH4]+ 112.128_1	38613.8	42255.2	35445.3	35267.6	33034	30767.6	29526.9	32029.1	30384.2	37748.2	33968	35916.3	26324.9	22123.4	20004.8	24799.7	19336.9	20351.4	20228.8	19706.3	24326.6	23637.9	27087.6	22427.9	30383.8	34301.2	31273.9	27571.7	27516.8	23481.1	31301.1	27380.1	24527.3	39758.2	34690.3	33546.9
97.1035754177643_1056.5990710138___9	6712.49	8701.29	6374.73	5471.27	5587.88	5491.19	5128.64	5461.5	4608.11	6034.03	5658.64	5694.34	11373.8	13331.7	10838.1	12983.1	11367.5	9347.78	10931	10411.8	9844.88	10783.9	11028.6	9165.94	10862.3	13474.5	10384	9874.92	10237.8	9174.78	9818.74	8584.17	8427.71	13955.3	12124.3	12352.4
97.1036657301337_617.868661920857__[M+3H]3+ 288.286_22	2237.74	2338.45	1925.8	2049.58	1608.43	1642.12	1660.98	1657.64	1830.52	2148.47	1729.8	2085.49	3740.56	3006.06	2953.77	2985.53	2247.69	2723.35	2452.63	3189.48	2446.37	2783.76	3050.14	3085.78	2647.46	2590.29	2197.29	1938.63	1793.25	1984.49	2224.81	1681.07	1963.98	3010.05	2334.82	2625.44
97.1034628029571_846.78289670249__[M+2H-C2H4]2+ 220.223_51	1267.01	6018.53	3191.98	1603.36	1379.74	1981.76	894.864	1071.54	1375.4	1259.03	1154.43	1394.94	1691.59	4362.64	3013.31	9868.18	2575.37	2238.57	2448.21	4331.22	2476.04	2109.59	1823.67	2151.8	7606.6	9897.89	5358.54	6345.38	3953.73	8011.93	7192.01	1437.67	5216.15	7459.23	6573.53	3786.05
97.2150192265987_982.088233699802__[M+2Na]2+ 148.454_1	250.622	207.523	261.961	343.936	169.523	237.176	264.872	233.073	209.849	219.033	280.578	353.923	175.421	101.063	182.406	154.153	155.104	124.869	208.655	168.307	158.229	206.972	208.145	196.71	228.436	278.839	296.505	215.543	223.524	206.358	183.387	206.461	137.357	334.071	324.804	363.199
97.2555018284384_741.771879047947___4696	25.6294	24.7372	24.527	20.7362	12.7446	11.5847	12.3463	24.7709	9.54879	19.2352	19.1885	15.8319	18.2108	11.9597	22.2092	33.2043	4.64442	15.5334	31.4949	6.49248	8.62196	46.1517	34.4501	17.2154	45.2654	77.6605	39.6452	21.4337	53.2436	52.3466	51.0898	29.9043	11.2365	58.9904	64.2489	28.2941
97.4118554820328_981.834653523978__[M+Na+2K-H]2+ 94.9197_1	200.245	295.093	202.179	332.359	262.526	253.835	238.313	230.991	210.867	397.252	263.926	317.498	188.825	155.667	132.602	176.252	83.3634	191.994	146.644	97.5845	177.79	182.852	231.468	168.799	339.524	498.717	266.468	203.664	283.916	170.063	253.671	448.807	263.042	691.337	207.363	236.771
97.5157364982457_1121.74112134653__[M+H-NH3]+ 113.524 [M+2K]2+ 117.113 [M+Na+K]2+ 133.087_134	29.6451	223.65	110.087	53.5158	184.385	201.834	246.736	83.7646	80.3921	217.366	229.57	47.0172	258.604	382.143	297.765	337.834	240.344	135.007	171.357	156.863	250.481	268.006	395.521	315.285	181.413	238.751	158.573	112.738	117.456	179.285	220.599	139.132	198.466	258.276	323.475	312.443
97.6354196681993_982.204873168209__[M+2H-C6H10O5]2+ 355.313_1	303.103	417.557	295.176	506.404	354.088	248.157	306.648	202.661	188.669	448.807	418.809	390.053	118.062	133.391	101.299	194.53	189	140.972	118.559	165.025	248.006	256.52	194.803	200.88	590.776	385.847	285.099	249.225	497.99	216.26	290.455	598.173	361.958	631.981	269.968	416.574
97.7251932006231_414.398623789451__[M+2H-C3H2O3]2+ 279.442_38	55.2996	74.2816	73.5657	82.7724	88.7591	63.3398	67.6385	74.0179	95.1719	70.4151	25.4535	79.0107	1033.7	673.087	750.753	701.627	696.779	729.391	651.977	820.402	626.342	842.886	854.565	794.256	324.652	304.004	488.505	378.559	391.518	292.547	338.233	376.4	275.595	588.166	371.79	375.938
97.762024443525_982.704949383924__[M+H-C6H10O4]+ 242.817_1	152.359	294.82	165.86	224.201	204.101	290.947	223.988	190.119	143.364	180.602	199.408	176.575	148.692	137.626	128.51	183.099	127.111	109.056	140.9	143.636	221.952	177.886	118.018	236.849	206.249	242.255	157.722	229.425	339.149	254.053	210.693	196.657	194.347	213.593	261.606	215.433
97.8751115904999_981.996845448557___1	330.029	278.34	274.574	344.171	299.913	228.776	249.278	269.767	202.456	228.788	326.717	299.2	165.16	217.883	191.496	160.753	175.404	97.0009	194.106	153.183	106.892	264.83	228.409	135.04	435.875	415.309	276.213	176.093	295.485	278.164	306.566	319.432	276.477	569.78	302.898	229.208
97.9432419778519_415.082837124249___38	68.1432	57.7746	61.3048	53.8021	65.3978	80.6143	74.704	59.2855	109.448	89.6192	44.5997	68.476	141.827	750.143	803.876	586.332	695.744	189.659	713.281	412.182	794.417	434.943	298.393	299.794	390.997	207.541	264.378	204.944	473.564	273.768	177.642	224.248	271.842	226.326	83.109	433.805
97.9681956223034_1122.50847192048__[M+K]+ 59.0042 [M+H-C5H8O4]+ 228.996_134	1939.7	6933.07	3005.21	1677.23	5292.26	1467.14	4793.83	2166.15	1894.35	4018.01	4942.75	2008.96	6561.16	9189.83	8660.08	9046.08	7805.15	5664.8	7400.51	4683.12	7129.61	7290.06	7621.41	6515.03	5209.7	4539.47	5682.59	4675.17	5055.18	4041.3	7168.08	4598.07	4673.55	7049.02	7309.35	5599.26
97.9683414260051_130.544592124148__[M+H-CH2]+ 110.978_125	2652.33	2590.97	2064.43	2080.26	1477.62	1825	1599.35	1764.44	1543.2	2040.09	1860.84	2059.63	15091	20203.2	13956.1	14912.4	13502.7	20094.8	8459.81	8822.67	19392.3	8613.67	5503.56	5203.77	15817.6	1107.19	25571.8	7226.68	6181.87	760.55	488.209	744.55	4872.42	9748.48	8727.42	6037.65
97.969715075832_1200.72192900563___8376	0.0389307	0.0751286	0.0558956	0.0378092	0.0579095	0.0525653	0.0559893	0.0451426	0.0434681	0.0583543	0.058061	0.0480593	492.234	343.061	299.282	258.287	361.565	438.6	232.713	0.0299218	450.501	384.522	0.0454262	305.293	0.0597342	0.0645454	0.0522024	0.049469	0.0539793	127.426	0.0425389	0.0459168	0.0513705	0.0539001	0.0402583	64.8078
98.0341615465876_329.884188507846__[M+3H]3+ 291.076_68	351.297	280.07	363.529	228.43	240.923	235.222	244.813	289.192	242.512	132.023	127.543	115.872	105.332	125.836	100.163	77.6248	37.2222	62.158	63.0328	94.8372	56.2906	69.3256	54.3575	86.5185	71.665	91.3905	73.9684	75.4367	99.8999	63.1048	111.11	79.9921	83.9192	152.396	113.791	92.3561
98.0624966783993_287.423412638638___13	1288.85	1222.65	1043.38	1257.9	897.068	1134.43	1191.9	1444.03	1536.57	839.181	739.184	936.966	155.698	89.9636	122.624	105.515	74.538	112.852	117.37	94.8376	73.7325	83.1547	118.636	126.401	559.412	775.203	555.685	877.458	575.171	948.075	787.556	730.841	582.696	692.455	475.8	408.444
98.0742359557926_1088.96280734047___33	19448.1	19202.2	18156.5	17333	17324.7	14377.2	16576.3	14513.6	16173.1	17132	17377.4	16895.8	653.361	661.194	519.907	616.213	472.689	434.236	535.013	605.595	525.493	484.872	547.995	448.692	2748.81	1625.3	2804.73	2335.52	2472.54	1863.66	2604.95	3034.17	1877.15	2531.64	2634.49	1960.92
98.1028778256177_770.79840492045___45	183.265	961.943	378.179	332.198	216.494	275.748	67.8621	79.4172	100.607	89.8351	147.104	158.607	87.7194	151.317	90.0236	572.089	94.2179	118.082	63.8291	112.108	96.1563	130.973	129.767	109.068	1665.73	2058.67	269.311	951.763	248.646	885.957	526.919	176.486	322.957	1683.33	621.48	236.022
98.1035795770694_927.45591827761___7	2165.91	2592.06	1711.11	1802.32	1720.93	1571.21	1631.29	1815.63	1531.5	2095.29	1804.34	1912.61	1398.22	1210.92	948.12	1233.13	1182.96	1044.59	1223.84	1161.51	1499.21	1342.65	1475.5	1196.91	2691.87	2913.22	2328.01	2175.32	2168.53	2042.06	2124.05	2076.89	1332.59	3434.57	2582.61	2634.89
98.1058937976332_982.663386715602__[M+H-CH3]+ 112.128_1	4432.43	5061.06	4016.22	3743.48	3704.11	3501.94	3465.52	3438.45	3511.74	4455.08	3864.95	4123.03	2749.69	2370.18	2013.63	2514.52	2062.4	2290.5	2316.16	2210.07	2511.99	2735.87	2838.54	2546.8	3554.14	3927.55	3449.11	3034.72	2967.5	2776.5	3787.73	2952.65	2617.3	4431.08	3544.88	3691.75
98.1056544721916_889.867606222324___85	1166.08	1478.16	1067.03	1119.33	1163.51	615.134	944.108	1110.21	961.32	1216.18	1263.2	1063.51	453.071	461.137	396.284	671.595	384.213	553.694	498.74	397.597	728.626	594.389	655.182	648.236	1219.84	1792.14	1306.68	1226.03	1169.14	1103.82	1219.7	1130.15	710.337	2142.72	1396.85	1528.38
98.1059244410678_1056.51970000522__[M+3H-H20]3+ 309.306_9	811.947	942.186	972.481	519.316	1093.29	814.318	680.228	866.219	742.18	976.439	1068.95	878.71	712.561	824.895	674.189	1004.28	870.55	642.244	563.582	667.575	1190.45	779.941	905.901	632.888	985.924	334.103	823.497	938.531	850.881	752.638	803.412	707.393	679.756	973.45	1014.36	1170.09
98.1019315165635_123.40952279255___7282	4.25071	16.4716	24.4395	12.3822	19.0048	5.75302	18.3458	19.6863	19.0008	38.2336	31.7585	20.9885	283.115	312.568	0.0509082	0.0508358	0.042614	0.0356921	0.0413265	186.506	0.0396735	0.0423771	248.595	25.9609	32.5401	358.638	575.419	556.697	333.563	5.27703	241.78	5.01505	11.2299	5.8906	253.135	371.793
98.1777795841648_414.335693190699___38	51.0458	33.014	42.9133	45.4678	95.099	66.676	49.1312	44.4108	57.1032	57.6123	38.1803	31.6043	172.533	518.961	544.079	725.465	430.461	594.532	357.222	510.637	483.899	395.765	427.308	405.553	341.121	458.106	316.036	282.272	317.332	279.837	469.238	233.881	251.958	396.737	363.573	361.702
98.1992492675781_126.065722553547___5732	8.47104	0.0751286	6.07397	8.21875	6.29856	0.0525653	12.1892	9.80859	4.72293	12.6964	12.66	10.4548	4.55427	0.0549343	0.0509082	0.0508358	249.62	0.0356921	0.0413265	0.0299218	0.0396735	239.511	248.595	8.59971	19.4471	7.00712	11.328	280.401	29.3441	20.9761	13.8523	4.9862	0.0513705	0.0539001	8.76292	0.0652299
98.2445542708166_983.16362914581___1	200.662	90.1997	169.006	156.888	82.9722	150.401	117.286	194.458	190.5	92.7017	134.487	122.237	182.784	126.119	108.583	93.6318	96.8442	115.269	45.604	152.846	166.232	127.556	144.564	117.465	190.956	206.586	146.609	125.28	118.419	78.9097	136.427	67.7183	181.397	200.295	149.978	158.026
98.330542919676_122.646272152894___7283	12.7521	8.2358	0.0558956	8.25477	0.0579095	0.0525653	6.11528	9.84313	0.0434681	19.1168	19.0551	5.24711	246.069	311.5	284.453	0.0508358	0.042614	0.0356921	0.0413265	0.0299218	246.711	0.0423771	0.0454262	21.6341	6.50802	0.0645454	5.69698	0.049469	0.0539793	274.406	4.6485	0.0459168	5.61493	310.894	0.0402583	0.0652299
98.3442735898887_983.494087722143__[M+H+K]2+ 156.715_1	215.216	232.534	232.907	117.477	122.184	127.11	233.015	101.964	158.174	266.919	223.125	191.682	139.362	173.734	93.9174	101.707	82.3108	97.7741	89.4798	57.2672	66.6287	129.571	88.4254	98.6066	245.111	254.938	171.086	198.683	153.765	116.777	110.983	187.156	112.174	296.831	184.428	108.329
98.4056977364796_414.20487324998__[M+2Na]2+ 150.839_38	60.7512	24.7293	91.8419	57.8681	56.9923	91.9771	61.414	44.4108	47.518	38.3612	44.5967	63.1298	187.421	408.063	542.969	453.15	403.58	265.822	267.434	329.404	390.254	314.72	311.463	301.524	382.744	278.393	299.289	235.306	215.784	201.733	268.783	315.414	219.281	410.161	291.629	318.422
98.513798251044_1121.20172800176___6221	386.071	4719.46	1860.29	258.92	3561.96	2906.24	3266.79	1152.45	556.193	3339.49	3277.17	582.317	3752.64	4736.19	5079.49	4789.53	3826.03	3196.19	3809.38	3403.29	4000.23	3901.24	4295.12	3779.77	3080.53	2884.61	3161.18	3067.89	3076.14	2605.13	4270.12	2946.45	2792.39	4117.65	4709.75	3757.28
98.5061466540909_127.140064201829___125	437.493	258.194	352.173	316.021	288.336	203.014	254.162	337.523	324.986	333.303	278.464	457.422	2078.57	2448.26	2031.31	0.0508358	2007.62	2343.47	0.0413265	2052.91	1269.02	3601.06	2130.5	0.0395657	3167.59	4360.55	1351.95	1135.83	2888.9	777.185	0.0425389	0.0459168	1515.59	1673.75	0.0402583	1565.04
98.513742996822_1064.10542040032___5482	685.828	3157.57	2744.05	2117.53	2354.69	2419.93	2639.36	1905.97	2036.74	892.193	3360.27	2234.62	2410.05	2799.28	2586.98	2236.14	2734.46	2360.48	2470.37	2408.52	2157.65	2343.93	2493.76	2793.91	2978.22	305.152	2656.91	2695.23	3027.72	2097.41	3981.19	2693.04	2572.34	3180.59	5171.13	3182.91
98.5354949822752_414.195351157571___38	68.1428	49.523	79.6961	16.5538	19.02	23.022	12.2947	44.4642	33.319	38.3612	19.1129	31.5649	171.225	54.8224	67.7905	149.776	33.1033	174.536	13.7383	200.523	74.717	174.134	111.134	96.6059	65.0971	102.76	205.11	102.253	64.8146	57.8844	257.703	52.2924	69.5265	213.22	133.77	95.4131
98.5556751058696_979.879268651851___1	123.992	279.88	262.003	429.534	124.071	194.101	282.839	216.278	173.06	386.288	234.103	339.458	109.244	77.7083	44.8734	159.701	74.7621	104.676	115.747	110.972	94.5634	91.7956	160.865	68.6569	341.526	340.792	227.955	190.47	379.2	208.704	223.999	381.181	299.181	343.986	141.213	204.619
98.6336684265446_414.230308356207___1745	59.5534	65.9449	67.3508	45.4678	25.3299	57.4857	49.1312	64.1489	42.7662	63.9353	25.4535	15.7825	210.764	223.224	169.349	221.349	141.672	95.4105	165.774	122.355	158.825	217.856	164.68	124.67	195.576	105.483	93.7498	168.752	166.92	122.582	175.607	235.305	210.176	160.858	128.903	164.02
98.6570732896169_414.128752111377__[M+3Na-H]2+ 129.348_38	93.5839	16.4862	85.7191	66.1349	37.9949	40.24	36.8484	29.6072	61.7734	44.7547	19.1129	63.1298	206.981	91.3706	90.3892	129.244	47.2027	115.659	72.3778	154.565	86.6463	158.269	130.56	161.885	182.889	121.244	105.363	54.649	77.5429	89.3173	177.924	230.112	79.488	248.014	146.015	43.2624
98.7858038537168_979.376431826472__[M+2Na+K-H]2+ 113.642_1	71.0547	139.3	192.097	311.526	203.917	199.15	169.541	308.607	196.405	439.224	193.036	398.094	59.2088	59.7756	115.496	125.294	78.5743	69.8648	97.5892	94.4868	86.6879	160.72	87.0612	97.6622	176.314	342.338	144.069	226.774	437.972	263.392	238.916	451.097	350.772	400.095	93.7216	227.7
98.8666639058554_414.301475145882__[M+2H]2+ 195.719_38	63.8842	123.803	82.6669	45.5248	116.301	138.196	61.4895	44.4641	66.6204	32.0069	38.1803	52.6738	429.611	444.994	477.795	294.617	387.612	340.388	172.309	410.099	396.209	420.955	410.557	384.012	597.032	693.334	719.286	631.037	661.677	446.102	645.593	607.883	420.754	748.503	770.54	663.854
98.9644644061172_1122.99854128712___134	6816.17	9934.32	8133.96	6187.54	8641.5	7213.19	8086.38	6388.31	6164.7	8403.67	8211.84	6708.5	12063.5	11951.2	11543.8	11881.9	9820.22	9553.76	9474.59	9127.69	9233.86	10813.9	12250.6	10803.9	9515.72	8313.78	10343.5	8138.77	8766.51	6423.04	11955.4	8972.35	7525.81	12178.8	12729.2	9423.54
98.9636890240758_1201.538646655___8394	0.0389307	0.0751286	0.0558956	0.0378092	0.0579095	0.0525653	0.0559893	0.0451426	0.0434681	0.0583543	0.058061	0.0480593	260.688	228.003	0.0509082	264.579	108.484	197.324	121.814	0.0299218	136.267	203.491	0.0454262	0.0395657	0.0597342	0.0645454	0.0522024	0.049469	0.0539793	0.0482588	0.0425389	0.0459168	0.0513705	0.0539001	0.0402583	0.0652299
98.9864230497471_690.442616309739__[M+2H-C5H8O4]2+ 328_116	2287.42	1909.95	1517.03	2006.47	1772.68	1529.96	1895.89	1331.42	1427.88	1656.86	1642.21	1763.89	543.13	527.638	610.461	525.387	506.744	469.053	345.86	447.425	506.995	339.331	541.255	576.441	2226.72	2079	2471.78	1976.95	2448.77	1897.18	2772.86	2479.63	2396.14	2771.23	3177.85	2912.17
98.9864553149283_793.059821936037___109	678.266	946.923	537.439	827.983	675.828	704.511	841.37	878.214	891.177	729.235	705.599	752.173	868.346	1324.49	950.304	538.938	438.074	493.429	513.792	608.143	514.166	550.702	788.328	422.591	895.39	884.698	1298.83	444.755	640.316	425.988	764.796	871.061	586.918	595.527	750.526	962.314
98.9815598695981_131.6337382777___125	847.657	647.658	752.386	1733.29	786.98	522.36	886.689	1899.43	2155.15	1421.2	1132.73	2253.04	2098	2605.88	3595.19	0.0508358	0.042614	1652.07	2294.18	1915.79	2037.95	2156.24	1709.58	1087.09	1957.9	1278.35	1742.2	2281.04	2735.06	1874.81	2999.35	3435.97	1526.65	2904.23	2695.65	1957.78
98.9865491198615_841.750047180648___26	575.838	687.088	310.156	549.473	310.137	346.284	717.867	1151.38	932.575	346.456	417.653	537.9	860.864	963.419	954.177	207.232	298.971	234.448	98.4716	85.8422	218.932	182.48	186.115	203.466	667.313	820.237	815.836	262.699	291.435	288.339	878.07	879.278	947.876	489.396	340.456	612.539
99.0118689537048_1199.19834176816___8356	0.0389307	23.9378	0.0558956	0.0378092	0.0579095	0.0525653	0.0559893	0.0451426	0.0434681	0.0583543	0.058061	0.0480593	17.8035	0.0549343	11.4016	11.3838	4.82118	11.3528	0.0413265	39.4841	17.7387	4.49569	9.63109	13.2922	0.0597342	0.0645454	0.0522024	0.049469	41.5373	10.2512	0.0425389	0.0459168	0.0513705	59.283	41.7421	27.6596
99.0464240284949_288.615117789192___683	1776.87	2155.74	2098.03	6787.72	6795.27	6582.01	6873.49	7162.13	6959.66	5550.75	5045.25	5752.96	378.315	312.812	335.358	419.714	440.645	535.928	399.833	484.386	448.233	435.506	634.304	603.438	564.87	625.03	571.278	659.029	591.004	644.337	667.166	584.003	663.709	1196.33	861.584	914.956
99.0466606888955_332.196564179196__[M+H]+ 98.0379_68	2688.73	2676.63	2439.01	1387.1	1330.01	1395.37	1282.48	1567.44	1560.9	1205.91	767.63	974.307	625.382	569.905	464.488	381.611	358.047	369.176	278.57	334.696	256.856	301.108	391.22	348.765	560.983	861.687	543.235	348.374	495.221	494.833	622.508	505.405	372.882	849.37	646.828	600.881
99.0474102739136_455.560935780644__[M+2H-C6H10O4]2+ 342.137_37	720.193	757.464	905.543	592.463	484.789	731.409	495.648	636.835	597.4	640.809	480.626	684.859	658.976	626.213	657.555	403.65	392.31	410.404	288.987	442.832	322.003	452.808	463.892	519.045	584.907	694.414	706.98	411.871	480.257	468.484	621.628	561.055	470.715	1449.49	1207.82	1128.22
99.0466751286833_259.291750954388___4811	2175.13	2568.28	3030.25	1988.65	2180.31	2036.5	1918.86	1951	2162	1778.7	1348.09	1482.98	486.883	432.089	400.289	438.738	409.938	435.502	409.202	623.814	438.624	404.943	545.002	477.407	460.752	457.119	594.454	481.418	317.529	518.953	531.34	479.922	433.772	791.991	553.872	602.934
99.0463981783713_387.403879983595___6535	748.141	873.794	883.244	841.431	763.519	843.076	807.52	836.993	630.119	740.813	710.57	764.819	957.683	680.542	891.252	783.866	685.208	587.232	520.908	722.048	561.274	493.228	563.45	507.691	743.215	716.54	642.43	772.741	670.379	618.925	908.734	739.734	620.298	1343.29	990.235	1054.25
99.0831830951206_926.711399483454__[M+H-CH2]+ 112.093_7	2336.47	2621.37	1910.01	2155.94	2233.33	1971.02	1690.28	2107.32	1881.94	2680.34	2031.96	2206.26	1636.51	1291.7	1193.89	1336.75	1292.46	1165.02	1006.49	1306.82	1605.68	1461.81	1574.13	1290.63	2668.58	2921.97	2404.33	2159.95	2413.91	1934.39	2268.21	2219.98	1706.22	3101.38	2571.13	2698.92
99.0834331671957_982.774383439448___1	2441.75	3078.39	2183.11	1948.89	1978.93	2068.84	1858.56	2021.43	2304.09	2447.46	2358.58	1969.6	1504.65	1342.67	1225.27	1527.53	1074.7	1239.16	1056.38	1214.51	1265.57	1365.88	1429.68	1357.86	1833.87	2195.26	1554.7	1473.06	1895.4	1350.16	1637.7	1502.32	1542.32	2114.01	1888.44	2067.5
99.090163882435_1085.97405669051___33	8899.56	9681.72	9437.31	8419	7947.79	7203.07	6930.31	7742.69	8966.2	9388.84	8001.99	8623.58	607.535	542.034	333.375	511.583	412.092	319.318	335.306	373.376	906.591	275.613	451.407	559.695	2922.83	2237.64	2578.16	1931.36	2265.36	1846.03	2126.54	2210.55	1903.02	3544.31	2039.88	3485.43
99.0832593801278_618.262043779214__[M+2H-CH2]2+ 210.166_22	672.134	841.431	662.408	585.065	496.762	417.521	561.698	491.482	489.34	514.072	470.974	582.598	922.138	683.884	715.831	705.34	596.507	630.042	630.8	722.238	594.069	670.478	839.023	771.748	683.347	505.803	569.305	471.664	423.725	565.528	629.171	530.991	584.383	726.537	730.024	640.303
99.0830134195655_769.743632656764___45	569.308	1653.43	764.969	640.804	448.24	513.938	326.58	349.544	455.603	403.523	388.157	458.989	353.137	363.161	405.217	975.979	351.321	329.674	268.665	358.56	321.49	381.557	424.565	275.006	2244.48	2289.37	753.327	1559.32	643.359	1033.29	1142.71	446.193	606.117	1698.99	997.483	733.953
99.0950086998564_414.246941498302__[M+Na]+ 76.1074_38	76.661	175.319	120.571	123.783	107.203	127.504	113.941	108.69	133.241	172.837	70.0805	94.8129	321.265	381.538	429.072	347.142	321.917	256.248	427.827	224.845	442.648	309.598	368.132	279.77	642.351	878.097	558.751	616.777	643.937	522.813	589.216	441.503	742.787	688.592	518.318	740.27
99.1868405655061_1120.69627330353___6210	42.3969	99.3984	91.6429	32.9003	69.9352	103.692	42.9201	49.2733	28.3397	70.3233	57.3323	20.8768	90.5478	111.908	111.772	159.678	70.1455	65.3101	62.6793	83.988	82.0816	111.179	163.153	125.145	110.042	112.247	67.9441	37.6203	58.6567	31.5966	69.0319	44.7704	33.4176	111.528	82.5343	106.412
99.2119293212981_133.66579069149___5733	4.27423	0.0751286	12.2473	12.4436	6.35003	0.0525653	18.4403	0.0451426	14.2818	19.2074	6.38109	5.27224	22.9367	0.0549343	0.0509082	300.05	0.042614	0.0356921	0.0413265	13.0886	0.0396735	246.058	0.0454262	12.9914	26.1305	28.2571	304.445	37.8595	11.8143	15.8414	9.2997	25.1122	16.8615	11.7887	30.8605	21.3909
99.2473913118787_981.112333396051___1	118.873	98.2443	60.7887	98.7972	119.701	126.034	67.0873	63.9474	108.138	228.755	126.398	162.088	85.5842	116.625	60.9215	88.1728	64.708	48.0927	67.2808	65.0824	51.4231	59.7435	64.546	38.6656	158.181	206.654	126.718	92.7613	134.464	74.4252	144.098	155.071	183.745	141.412	105.947	129.36
99.3244890750268_414.456927859151___38	135.938	98.9173	73.4736	152.919	63.3248	57.4857	55.2726	145.24	99.7878	70.3288	82.7239	84.2781	448.714	495.794	364.718	389.118	333.11	353.679	338.802	320.346	304.669	426.66	391.295	294.512	736.887	497.552	635.271	516.121	769.12	537.097	725.952	565.746	571.688	790.182	610.573	616.247
99.5138870143549_1122.87897110112__[M+H-CH3]+ 113.524_134	6644.62	7916.36	7493.67	6560.17	7237.01	6557.73	7508.32	5937.23	6357.23	8071	7126.93	6883.54	11387.6	9135.22	9238.27	9491.61	7559.32	9089.41	7078.83	10529.4	8255.78	9408.74	10294.8	9693.45	9231.97	7776.1	9916.61	8375.15	7995.74	6383.52	11513.6	8286.41	7372.82	11564	12910.3	9684.66
99.5138671731124_1055.78351374473___9	1865.39	2445.94	2006.09	1329.58	2507.1	2326.91	2083.21	1718.29	1419.52	2119.65	2714.2	1736.73	2962.68	2794.89	826.725	840.296	2497.93	2711.34	2731.63	2038.34	2491.42	2649.7	2962.92	2770.55	3099.49	2636.92	2805.9	2572.1	2567.03	2317.26	5568.63	2545.81	3025.31	2386.83	6511.49	3658.48
99.5015100751785_125.228035284572___5734	4.23552	16.404	6.08566	8.21875	0.0579095	11.457	0.0559893	4.90429	0.0434681	6.34822	12.6855	5.2274	261.321	1222.04	913.26	314.685	0.042614	1619.43	230.255	496.147	0.0396735	0.0423771	1024.21	12.9221	338.403	1167.01	0.0522024	16.1391	41.1542	872.34	13.8839	14.9857	22.3609	1010.2	0.0402583	14.183
99.554641370368_414.666081704189__[M+H-C3H2O3]+ 184.544_38	116.723	107.296	85.8267	170.295	107.779	132.438	104.532	49.4046	123.724	115.085	57.2704	47.3382	216.494	297.158	118.166	322.422	286.15	290.922	272.595	244.544	221.732	260.723	282.11	274.936	517.4	468.022	621.503	320.495	388.61	337.948	502.117	320.281	368.629	450.814	471.426	485.334
99.5642493690473_482.662276671513___110	289.851	409.247	424.727	138.263	170.944	253.274	59.6936	39.5312	23.8193	31.9914	44.679	21.1108	51.064	30.0095	55.7427	76.0916	51.4739	42.8498	27.0777	6.54744	4.34214	13.8861	4.95437	8.67379	97.9553	119.697	68.4517	87.6393	76.4476	133.772	23.1622	50.1675	22.288	46.9898	35.0731	56.9208
99.6855350797427_482.083779469545__[M+2H]2+ 197.348_110	755.44	831.566	726.838	81.4588	140.981	492.19	110.021	74.1588	122.156	51.1252	42.9421	77.5287	87.7548	121.911	111.228	63.8735	135.105	97.3601	27.0705	26.1902	34.6897	18.5103	14.8667	12.9769	68.451	56.3428	73.55	209.63	125.526	257.589	55.5893	105.666	11.1974	64.5939	52.6091	28.4602
99.6747761954487_1120.90801853212___134	51.3727	82.928	61.9351	61.7492	114.571	92.3712	110.49	59.1955	56.7372	83.2031	121.299	62.6923	107.604	138.146	102.155	94.0471	129.438	137.392	122.216	134.123	155.247	138.626	131.563	142.399	103.695	61.4807	129.948	123.604	135.079	100.166	82.9209	114.406	89.1123	146.748	159.522	130.191
99.6814709443312_123.812027274173___7284	8.48482	8.19957	0.0558956	8.23499	12.6409	17.183	0.0559893	0.0451426	9.45575	6.36068	12.7034	15.7061	466.515	0.0549343	0.0509082	0.0508358	0.042614	0.0356921	0.0413265	3.26239	231.653	0.0423771	262.864	0.0395657	332.676	379.724	300.228	5.39038	5.89126	0.0482588	257.436	0.0459168	11.2027	0.0539001	0.0402583	0.0652299
99.7849385228187_414.28570098211__[M+2H-C2H4]2+ 225.588_38	118.79	65.9449	73.4736	99.2024	88.6547	132.217	85.9796	59.2144	66.5252	57.6123	44.5436	21.0695	98.9746	157.819	154.932	162.707	175.644	160.414	138.473	152.278	92.1456	139.651	129.961	211.22	281.988	240.418	147.404	201.371	238.615	271.287	130.592	126.719	195.486	460.767	171.321	271.841
99.8037983552108_482.83306364648___110	863.941	942.707	628.147	180.623	329.955	378.848	180.507	131.678	33.347	31.9914	170.019	42.4807	138.07	24.0132	163.336	117.528	69.9091	93.7787	36.1035	36.0109	43.3621	18.5148	9.90873	17.3241	119.478	49.3	89.138	154.303	159.739	232.145	69.4866	47.154	89.689	70.4847	61.3779	63.9588
99.813892929652_125.361182420329___5735	8.47254	8.18899	0.0558956	0.0378092	6.29856	5.71897	0.0559893	4.90647	9.44587	6.34986	31.7147	20.9149	0.0419457	0.0549343	298.01	288.374	246.286	208.037	0.0413265	12.9994	228.177	0.0423771	257.904	12.8996	32.4118	7.00712	295.597	5.3704	305.178	5.24402	0.0425389	4.9862	0.0513705	5.85276	0.0402583	0.0652299
99.8453814891475_1121.8909283586___6222	101.882	74.6392	97.9654	53.5754	95.477	80.824	61.3963	24.6639	56.8136	64.0032	57.3925	47.0172	81.5891	110.506	127.213	121.921	64.7156	100.12	44.817	71.3357	82.0541	78.4663	113.096	64.5705	97.1857	42.1795	73.7671	91.4575	88.1934	84.3518	184.697	74.6974	98.5191	48.2087	145.685	113.47
99.9199349085403_482.861165714044__[3M+H+K]2+ 53.293_110	699.327	389.985	565.877	151.529	170.519	128.961	6.15778	48.1369	71.458	148.041	38.2963	63.3325	41.2394	140.019	61.317	94.3538	32.6686	79.1533	22.5647	22.916	17.3686	18.5148	24.7718	30.3583	156.222	107.037	150.873	102.716	29.0235	138.864	37.0595	35.1173	33.6802	46.9898	30.6889	56.9955
99.971835187425_1122.9060515158___134	5709.57	8006.9	5991.07	4862.8	6933.36	5771.47	6704.03	4815.12	4323.64	6780.38	6969.51	5386.64	9785.28	9197.72	10128.7	9497.99	7873.8	8054.74	7949.04	7482.41	8017.15	8641.77	9989.72	8928.7	7866.46	7050.82	9397.49	7017.18	6478.05	6020.46	11199.9	7071.66	6599.52	11508	11786.1	8680.99
99.9616308429426_125.160162399453___5736	25.4131	24.567	24.2959	20.5469	44.0899	22.8759	24.3784	24.5215	33.0605	19.0446	44.31	26.137	1872	1850.31	0.0509082	568.777	1275.51	1211.04	487.132	551.637	1219.21	1691.93	268.482	40.5991	181.439	1367.87	416.976	1368.92	563.406	36.7081	353.723	104.71	366.592	978.88	0.0402583	921.854
100.015213686854_414.229574139573___38	55.3663	74.2816	61.3048	41.3862	76.0792	80.6143	49.1916	59.2855	38.0688	76.8165	63.7138	84.2781	143.276	172.28	139.833	126.582	125.475	136.193	100.155	122.108	161.384	101.7	138.935	160.586	336.714	189.303	132.848	282.927	292.767	238.468	178.237	167.46	147.147	409.755	257.68	457.268
100.036498941233_483.708738569049__[M+H]+ 99.0336_110	155.206	418.159	425.226	144.314	115.007	232.293	97.2127	98.9587	65.5972	70.3842	50.9923	63.2474	105.389	144.803	81.8648	61.0525	37.2855	42.9069	45.1294	26.6305	39.0271	60.251	44.6477	57.1169	156.482	98.5742	135.659	144.494	131.564	131.036	106.546	115.229	112.115	76.3585	136.094	85.3812
100.078145708788_982.76869570987_[11][M]2+__1	23343.8	24624.4	19886.9	20216	18077.5	16962.7	15773.7	17380.6	18209.2	21416.6	18373.6	19883.4	13754.3	11962.5	9919.43	12724.8	10692.9	11289.6	10670.6	11490.1	12796	12968.9	14844.7	11990.9	17096.4	19116.7	17881.3	15916.6	15475.7	13698.4	18351.6	15560.4	14293.8	22225.4	20052.2	18604.4
100.07817738576_890.297384741269_[12][M]+_[M+H-CH2]+ 113.088_4	7703.27	8212.22	6773.97	6927.83	6519.15	5793.55	5248.5	6221.01	5795.57	7391.44	6531.93	6797.28	3947.69	2918.18	2098.07	3323.81	2105.18	2706.8	2746.06	2454.15	3946.51	3758.99	4175.68	2739.71	8987.42	10585.9	8433.13	8644.56	7745.7	6578.16	8126.94	7603.87	6049.65	12000.8	9501.46	9252.99
100.078218829932_927.951970691954___94	11038.5	12063.7	8341.54	9597.33	9130.54	8520.47	8336.98	9230.85	8358.41	11314.8	9158.47	9860.12	7118.5	5008.08	4631.37	5393.12	4749.73	4994.61	5094.24	5299.64	7421.36	7090.52	7304.57	6199.16	13299.5	14694.1	13110.8	11577.4	11773.1	9242.87	10629.5	11281.8	8498.88	17346.4	13748.7	13322
100.078196310634_770.318838225896___45	508.239	7312.14	1835.21	1318.93	722.698	1136.57	246.771	261.22	302.198	352.527	243.041	465.904	254.004	230.286	289.767	2821.08	160.17	396.562	211.431	497.487	193.948	392.341	314.887	185.353	7954.06	10308.2	1316.46	5938.28	920.962	6155.29	3593.12	601.942	1564.84	8498.42	3012.21	642.262
100.048859506286_123.937197037991__[M+Na]+ 77.0629_168	29.755	24.5987	36.5055	24.7643	6.30474	22.9107	36.6917	14.7647	28.3672	25.4891	6.3517	31.4827	0.0419457	0.0549343	0.0509082	0.0508358	0.042614	0.0356921	0.0413265	205.782	0.0396735	0.0423771	321.715	0.0395657	719.499	0.0645454	0.0522024	0.049469	0.0539793	279.018	0.0425389	552.16	0.0513705	0.0539001	0.0402583	0.0652299
100.078466528637_1057.7020986492___9	6125.32	3366	2997.56	5355.96	3265.5	2360.21	2492.99	2483.14	5338.97	6059.56	3091.04	6726.81	2232.21	2026.95	3333.6	2706.93	2070.54	1856.12	1815.56	3446.83	2009.9	1927.42	2230.05	1935.82	3481.4	4758.07	3312.54	3375.4	2976.91	2603.56	3277.52	2707.16	2658.59	3757.86	3592.29	3847.35
100.25121821631_414.230908349088___38	80.3487	173.105	122.456	116.764	113.985	108.212	42.9898	83.887	96.2849	31.9677	25.4838	57.869	332.867	215.719	179.379	174.969	210.717	121.526	119.544	252.57	170.098	202.656	221.797	167.817	362.856	447.855	469.603	470.878	317.179	230.606	381.424	298.792	309.489	401.953	507.996	480.464
100.271873823416_482.915687970161__[M+H+Na]2+ 176.547_110	199.386	267.798	198.01	33.9584	25.4182	113.207	43.0351	29.6484	38.1629	25.6265	25.4961	0.0480593	32.116	53.1751	39.0734	27.7511	23.3035	15.5818	0.0413265	19.6692	13.009	23.1735	14.8631	30.3161	45.6405	56.3281	28.484	49.2145	29.4029	57.9405	23.1622	25.0498	28.0288	29.3686	21.9207	0.0652299
100.333341037394_1123.04526444201__[M+Na+2K]3+ 200.077 [M+2Na+K]3+ 216.051_134	47.2484	116.107	79.5976	70.89	76.3835	80.8272	61.3974	88.7864	52.7034	70.4067	84.7738	53.0187	169.01	161.911	225.091	88.5373	83.3015	105.722	95.6109	105.037	82.3509	139.903	93.4828	117.29	110.162	112.504	178.607	69.8553	111.711	68.4553	138.168	94.5074	150.373	164.332	157.349	148.697
100.371216942292_414.309464720174___1746	46.792	123.803	191.451	45.5248	38.0396	57.5817	30.7448	39.4762	28.5516	6.40137	12.7268	36.8717	82.2127	112.479	84.7734	140.499	107.361	124.519	60.8051	93.6919	104.694	146.353	146.056	125.932	346.266	101.912	170.39	214.956	248.017	208.915	370.306	188.729	217.241	317.328	403.941	121.058
100.385865921058_1122.33551627288___134	114.102	82.9324	116.334	37.0494	70.0165	40.412	67.4608	59.1257	148.501	76.7179	89.3822	114.931	163.454	71.372	121.544	165.916	64.7156	151.356	104.192	71.0565	125.732	154.05	210.84	137.947	103.665	112.354	193.099	112.849	111.583	100.052	151.983	89.5359	134.329	162.369	200.67	84.9884
100.392900415193_483.019788838322__[3M+2H]2+ 66.2535_110	111.22	148.302	125.278	42.856	57.1138	59.2061	6.14787	39.5312	23.8193	31.9914	25.4962	32.4186	54.9859	30.0095	33.4456	5.55022	32.5843	23.3726	13.5388	6.54744	4.33635	13.8861	19.8175	12.9926	26.0494	42.2461	17.0904	43.2115	47.0447	50.515	23.1622	20.0149	22.3946	17.6212	48.2255	35.5755
100.482580755918_414.185591507365___38	25.5535	93.9243	121.474	45.523	77.3026	51.7995	36.884	59.2856	38.0788	83.1159	25.4838	21.0433	175.931	48.731	118.371	154.923	108.768	116.609	27.4767	45.6572	127.185	46.8952	91.0162	115.056	278.68	173.914	130.897	233.936	257.938	143.8	282.865	233.107	102.388	256.075	242.469	263.585
100.511685460883_1122.96629979668__[M+H-CH2]+ 113.524_134	3096.41	3804.57	3416.97	2777.54	3363.54	3141.16	3211.81	2657.38	2802.81	3756.37	3332.59	3115.61	4970.72	4126.4	4021.58	4256.31	3181.76	4220.49	3127.25	4502	3697.4	4256.93	4668.29	4341.95	4134.68	3530.85	4620.32	3857.64	3927.12	3125.18	5478.74	3884.93	3585.77	5170.06	5928.12	4317.34
100.501622772201_125.6268088006___5737	4.23552	0.0751286	12.1502	12.3281	6.28642	0.0525653	6.09461	14.7129	9.44104	6.34822	12.66	5.2274	750.082	358.555	0.0509082	0.0508358	0.042614	0.0356921	0.0413265	329.677	463.124	0.0423771	262.864	0.0395657	38.8942	363.379	315.72	268.52	352.129	287.632	0.0425389	0.0459168	0.0513705	664.918	0.0402583	363.437
100.511863167388_1054.34652743458__[M+H]+ 99.5072_3	411.43	1153.12	623.352	614.606	1001.55	853.2	757.073	624.52	531.995	959.203	982.264	559.82	1246.59	1249.01	1186.91	1258.88	994.863	1153.33	1191.17	991.184	930.972	185.507	1310.76	1425.24	1588.71	1336.4	1190.24	1040.98	1263.47	1176.79	1803.17	1082.6	1220.4	1450.82	2868.1	1300.18
100.574722467841_982.104678723681_[11][M+1]2+__1	165.886	122.967	152.164	127.363	132.15	79.5594	158.947	95.179	159.906	76.1788	143.709	73.2708	98.0771	123.706	88.5029	105.166	83.0979	136.013	76.1612	102.135	85.6907	121.81	122.95	103.111	159.817	312.428	109.405	117.86	136.378	101.861	207.006	159.023	134.56	137.88	111.486	203.667
100.647725508608_982.774777087685___1	131.147	180.722	202.29	201.694	121.267	121.787	118.911	173.851	133.63	224.085	242.469	214.699	97.9108	77.7014	110.621	174.303	125.457	96.9803	157.017	70.3281	90.5214	172.585	184.59	169.628	131.758	120.164	159.975	147.532	199.057	139.317	98.5777	156.252	118.892	272.867	164.986	172.749
100.655184021738_1051.61578357822__[M+3H]3+ 298.942_3	106.767	200.66	203.705	120.577	268.199	93.2447	130.033	136.625	104.858	154.989	303.981	97.665	152.574	137.705	243.211	116.848	74.3841	135.204	63.1332	71.2249	94.2129	64.8585	131.334	132.665	317.963	491.806	171.019	207.631	129.93	201.741	181.392	288.928	296.4	177.304	109.658	315.864
100.680599026389_1123.21433381829__[M+3Na+K-H]3+ 195.125_134	150.632	124.125	116.204	108.946	63.5824	69.2027	141.054	114.64	96.4285	147.043	146.671	74.1023	181.178	113.033	162.476	192.312	138.526	157.44	116.377	110.239	168.467	157.175	178.12	132.787	129.602	168.561	158.739	161.204	140.946	110.471	216.463	129.326	168.276	176.07	204.422	141.047
100.734077226673_1122.62841139803___6223	72.0682	115.972	85.6239	53.5158	38.1495	28.8345	91.992	59.1257	66.2052	65.3521	82.9011	120.155	126.244	135.047	115.899	165.984	87.8278	80.6398	66.5243	61.367	130.716	106.041	90.4743	94.4959	97.0849	98.4424	73.6232	80.5227	109.496	42.1273	139.357	64.5977	109.502	117.394	164.759	56.6589
100.933910830895_127.837551661185___125	42.2285	41.7602	24.2554	73.7701	50.2997	68.5241	30.9953	73.3745	37.7312	45.2144	38.6273	74.4641	477.32	1387.62	0.0509082	0.0508358	0.042614	0.0356921	0.0413265	317.756	0.0396735	0.0423771	0.0454262	235.769	155.161	118.792	468.795	142.818	177.502	132.485	336.53	129.549	127.982	204.519	0.0402583	105.901
100.96025563902_1122.94858705068___134	3042.3	4184.36	3229.09	2549.81	3215.38	3098.38	2961.87	2648.34	2530.6	3410.6	3440.96	2904.19	5195.53	4849.98	5024.54	5181.14	4122.9	4271.51	4255.04	3824.02	4225.26	4354.02	5279.76	4679.91	4010.11	3615.12	4507.31	3561.64	3653.66	2929.49	5581.67	3796.12	3055.4	5277.34	5601.23	4242.87
100.941491021149_1200.74777792018___8377	0.0389307	0.0751286	0.0558956	0.0378092	0.0579095	0.0525653	0.0559893	0.0451426	0.0434681	0.0583543	0.058061	0.0480593	159.237	104.768	28.504	299.434	31.6796	72.6973	48.2825	0.0299218	74.7265	81.0112	0.0454262	48.7741	0.0597342	0.0645454	0.0522024	0.049469	0.0539793	0.0482588	0.0425389	0.0459168	0.0513705	0.0539001	0.0402583	0.0652299
101.025629913086_270.906931950697__[M+3H-CH2]3+ 314.064_90	2040.02	1715.87	1989.21	268.566	269.704	250.678	136.021	136.935	122.501	141.641	147.832	169.615	1721.67	1380.29	1301.96	256.739	215.229	230.883	76.9598	128.485	82.7438	116.196	54.7134	71.8722	2261.57	3133.08	3076.38	325.743	163.919	323.104	102.539	214.834	146.736	273.926	228.146	114.531
101.025644981898_228.065761599008___6012	782.851	987.786	840.84	270.792	275.378	254.398	111.231	154.684	167.793	77.1425	102.634	135.854	490.196	513.726	499.294	155.883	182.169	105.107	122.085	147.574	113.121	64.9755	115.285	108.637	1280.52	1715.17	1127.16	276.38	320.572	285.606	254.262	234.341	214.287	343.005	241.778	186.228
101.022268027192_128.268609233487___125	142.089	108.039	166.436	1474.68	5882.35	4403.37	7086.28	3606.16	3093.94	4922.61	6280.08	2940.59	0.0419457	0.0549343	1825.12	8787.53	10939.4	5051.35	4886.78	2025.94	3333.18	1809.17	1888.56	1093.37	580.225	346.947	1054.63	2178.52	3428.94	7150.1	3012.47	5256.82	5228.49	2081.69	2060.85	6234.15
101.025673512441_309.095350195391__[M+H-CO]+ 128.017_60	3231.55	3312.08	3163.69	570.273	387.23	372.394	166.175	235.818	186.893	200.57	178.669	216.15	1528.03	1468	1266.43	227.241	239.459	266.986	126.332	148.703	117.067	101.766	118.857	108.263	3070.84	3916.14	3363.57	386.84	411.295	430.005	274.302	257.751	188.816	252.914	240.791	306.078
101.023071289062_1198.96812196991___8357	0.0389307	0.0751286	0.0558956	4.01231	12.3028	5.57823	11.8949	19.182	18.3647	6.16889	18.5045	0.0480593	0.0419457	0.0549343	0.0509082	0.0508358	0.042614	0.0356921	4.38988	3.17565	17.4344	0.0423771	4.82116	0.0395657	6.59349	0.0645454	0.0522024	0.049469	22.9357	10.2536	0.0425389	14.6324	5.45441	34.3052	21.3226	27.716
101.063319783446_1082.37113323832___33	15601.5	14210.9	9574.98	12739.4	7404.99	7304.73	11399.5	11425.3	11911.3	12177.3	11963.3	14241.6	1336.09	2069.58	1802.76	1779.89	1739.58	1081.48	1655.56	1585.58	1557.76	1551.83	1446.91	576.57	8788.96	10987	7425.6	7269.14	13612.1	12796.7	4319.49	7247.75	10060.1	5247.88	6329.26	15526.3
101.071473612958_1056.32480448257___9	15837.4	14546.8	13879.1	12518.7	11558.1	11315.3	11364.7	11544.9	11718.1	12684.8	11847.5	13900.9	725.764	866.6	659.591	724.316	500.159	677.34	540.681	649.618	675.926	613.976	860.434	597.669	1167.94	167.03	2143.34	711.439	0.0539793	415.891	1675.42	1162.81	230.809	2447.53	1584.78	191.577
101.080830881301_982.153308668334_[11][M+2]2+__1	1290.8	2162.27	1543.61	1001.5	2114.15	1422.09	1160.33	987.04	1198.93	1313.78	2022.63	772.485	824.952	736.716	782.341	1023.36	816.46	787.599	880.957	563.817	700.281	776.203	740.745	798.117	633.498	934.837	720.916	599.547	793.531	761.152	912.989	776.602	382.153	1395.26	1341.74	983.626
101.09173788376_891.956101890861_[12][M+1]+__4	583.016	599.533	231.781	420.394	387.282	209.79	518.231	483.511	403.064	334.122	553.956	500.512	349.234	208.209	169.637	398.435	201.23	138.893	216.142	146.072	165.633	182.841	74.0284	168.966	682.263	757.824	498.461	609.597	649.994	397.422	514.796	441.28	566.984	819.382	621.367	748.712
101.08014763695_927.296397812915___7	340.05	949.491	507.87	458.945	617.456	587.486	670.771	552.907	480.791	787.306	706.595	712.17	412.019	228.71	295.962	524.055	317.133	227.567	368.967	236.303	550.839	282.387	389.346	328.723	657.013	598.083	782.314	656.927	462.042	515.086	443.539	350.362	355.036	516.748	573.849	607.537
101.351968956103_983.85107358392___1	135.868	124.813	136.144	53.3751	130.623	139.768	90.6973	141.49	115.439	174.643	204.809	166.587	102.648	89.7658	88.5879	55.0799	46.2251	97.0606	67.312	19.5256	81.4436	87.1951	88.697	34.3756	166.218	114.107	141.044	206.894	130.763	130.771	145.845	55.7068	95.9809	102.732	85.8167	122.077
101.390070781788_123.224647192673___7285	4.26118	0.0751286	6.10987	8.27495	6.33495	0.0525653	36.6917	24.6078	9.5004	0.0583543	19.0551	0.0480593	4.58424	0.0549343	0.0509082	288.584	480.525	198.236	465.163	3.27064	0.0396735	0.0423771	0.0454262	12.9804	6.52271	711.894	0.0522024	10.8069	5.90604	10.5541	13.9455	10.0301	0.0513705	600.925	220.313	0.0652299
101.51090758995_1122.51134190539__[M+2H-CO]2+ 228.996_134	537.379	664.81	625.425	489.907	573.214	610.858	639.657	419.211	421.388	572.097	691.565	547.733	1036.44	718.033	782.223	827.838	605.336	585.699	597.098	920.784	612.864	734.15	787.939	857.656	635.788	662.934	833.551	600.997	693.518	494.192	1178.71	815.464	678.566	1039.11	1019.91	777.902
101.808250427246_127.147149828792___5738	4.22955	0.0751286	12.1277	16.4134	18.8624	11.4207	43.5013	14.6926	18.8656	12.6796	32.2686	0.0480593	13.6414	306.557	0.0509082	0.0508358	464.69	213.218	0.0413265	168.612	0.0396735	0.0423771	0.0454262	8.58351	0.0597342	359.471	16.9661	300.03	17.579	5.23519	0.0425389	9.95675	39.0037	11.6868	0.0402583	0.0652299
101.96695102888_1123.02742837072___134	2456.1	3292.84	2546.2	2164.58	2928.28	2261.29	2742.34	2291.21	2077.92	2810.1	2849.98	2160.14	4378.2	4015.03	4052.57	3929.15	3381.61	3339.6	3348.46	3422.53	3601.36	3763.31	4223.66	3828.23	3495.85	2954.37	3811.07	2824.82	2963.58	2464.64	4769.73	3348.85	2782.21	4867.33	5235.11	3605.01
101.947064137838_126.334051378557___5739	42.2955	32.7559	18.1915	45.137	18.8624	45.6827	12.4289	44.0778	23.582	25.3592	25.8149	26.1025	659.194	1630.58	0.0509082	391.996	0.042614	1060.43	293.784	863.037	755.913	820.07	0.0454262	167.808	116.516	852.065	950.077	176.957	124.129	323.228	156.807	109.019	116.91	110.537	135.925	393.65
102.015597819997_1184.21732176502___7969	3998.5	2194.97	2723.55	3337.05	1794.94	1851.85	1692.82	2132.15	2661.81	2831.4	1840.62	2737.77	3742.38	2689.64	2263.12	2511.7	2022.47	2367.08	2018.22	2911.31	2114.75	2207.26	2699.83	2658.07	6386.14	6917.45	6265.34	5303.76	5879.13	4627.93	6730.41	5620.33	5501.94	7628.93	6683.02	6744.95
102.056694139136_125.920652697107___125	93.1815	65.4008	42.5178	131.5	113.374	108.489	121.892	112.799	169.762	158.705	110.168	130.685	50.097	0.0549343	0.0509082	358.306	0.042614	0.0356921	0.0413265	216.4	0.0396735	244.133	0.0454262	0.0395657	369.495	119.121	124.608	374.491	602.417	577.925	0.0425389	0.0459168	379.477	364.412	0.0402583	99.1155
102.060084788683_409.471077439326___3874	55.453	41.3249	18.4167	78.7389	31.734	51.8543	74.9771	24.7353	57.2233	51.2778	38.8419	48.0986	122.77	66.0696	89.1358	33.3364	60.5887	27.2786	81.3676	61.0772	60.637	92.5608	84.1244	73.5461	169.742	176.085	140.907	97.1013	88.3811	123.477	160.733	109.034	104.793	143.905	103.51	203.12
102.093858303786_959.653365945839___2	404.316	507.883	409.647	462.397	432.837	395.21	416.797	410.238	394.357	420.935	444.998	409.049	429.658	243.841	222.126	449.199	252.503	258.764	288.668	358.85	372.571	347.166	320.135	349.379	736.055	813.463	786.469	629.845	676.47	629.189	712.42	711.671	712.609	802.132	700.474	601.484
102.094019651287_863.782962261628__[M+H]+ 101.089_6	472.6	408.828	380.527	471.451	391.67	310.269	332.394	439.325	310.474	550.738	359.434	351.16	278.166	375.635	162.404	325.252	166.158	233.823	160.883	303.93	387.78	240.079	342.106	277.061	669.597	1100.8	685.286	737.251	573.409	529.588	608.648	688.061	544.481	836.858	671.267	726.72
102.130182085941_1099.96234895097___56	3595.67	3184.06	2666.81	3164.91	2415.21	2510.42	2276.98	2424.52	2608.21	2746.32	2536.86	2789.23	4742.81	3641.47	3174.46	3460.87	2734.95	3450.42	2678.38	5740.44	3049.8	3545.9	3972.81	3504.25	4758.43	4386.15	5410.14	4412.63	4865.78	3272.17	6725.08	4000.76	4453.35	6133.91	6870.45	5515.36
102.243104429013_757.540235318945___2190	25.8001	41.594	18.5297	12.5212	25.637	11.6496	43.4589	14.9714	24.0323	6.45824	25.7304	10.6346	18.3569	30.0977	27.8909	33.3681	0.042614	27.3643	27.1332	22.8599	17.3477	27.8635	29.7453	34.6694	32.9076	49.8594	28.8217	21.8168	53.7383	15.9907	51.5168	81.1903	51.0701	170.978	150.142	36.0007
102.252045356913_482.934178686331__[M+H-C4H8]+ 157.31_110	343.582	350.236	176.466	132.66	120.141	128.949	43.2951	34.5898	38.1109	42.2313	38.2442	36.8943	45.7679	60.019	43.8146	38.8516	93.9741	31.1635	4.51294	26.1898	26.0181	9.25742	49.5437	25.9852	32.6004	35.2051	17.0904	124.414	80.4252	95.0386	18.5298	35.0698	28.0288	46.9898	30.6889	42.6906
102.376165755612_482.908900725347__[M+2Na+K]3+ 222.182_110	197.76	138.214	480.827	114.027	88.8438	103.247	30.7476	48.0928	33.347	25.5931	49.271	36.4429	96.0733	54.0298	33.4456	44.4018	45.7061	68.3322	0.0413265	3.27372	21.6811	23.1436	19.8175	4.33101	45.6526	77.4714	28.4828	64.3567	58.8038	119.173	64.7764	47.3009	61.6612	23.4949	21.9207	56.9204
102.510556871018_1121.25414410669___134	237.019	166.556	110.69	194.349	269.413	92.7361	147.95	107.737	147.381	248.816	173.502	152.24	336.646	222.634	240.912	272.599	148.72	286.06	156.166	560.686	195.356	232.248	181.436	281.16	169.409	155.355	230.049	250.116	171.19	164.087	265.313	206.003	238.835	346.669	289.975	163.772
102.501645084384_123.942968806741___7286	8.50142	0.0751286	0.0558956	8.25477	6.32043	11.4554	24.4611	0.0451426	4.72787	6.37226	12.7034	0.0480593	0.0419457	317.491	0.0509082	288.937	246.927	0.0356921	0.0413265	9.78717	0.0396735	0.0423771	0.0454262	0.0395657	6.50802	28.1285	291.359	16.1711	23.5651	0.0482588	0.0425389	0.0459168	0.0513705	0.0539001	0.0402583	7.1053
102.492363236468_482.908900725347__[M+K]+ 63.5274_110	191.121	165.111	250.543	84.8273	19.0371	63.301	25.2691	19.7656	38.4216	38.3886	6.37404	15.8119	73.3138	36.0114	52.5668	33.9131	48.2029	82.4373	22.5647	29.463	21.6817	18.5147	29.7262	21.6543	26.0803	35.2051	56.9679	120.22	58.8058	79.0098	32.4271	10.0199	39.2403	41.1161	39.4091	7.1151
102.582835533062_414.263181805109___1747	46.792	41.2155	79.5964	107.334	75.9898	57.4857	30.707	64.1489	57.0216	38.3612	44.5436	42.0866	506.866	635.68	398.062	713.156	455.639	427.105	350.489	384.761	573.606	403.861	561.993	439.034	287.14	362.573	303.244	275.344	283.723	247.834	154.013	274.187	229.891	375.429	211.857	275.679
102.616960094033_483.539369240009___110	208.471	121.312	111.27	67.9983	31.7286	69.0557	12.3121	4.94794	19.0547	38.638	19.1474	10.5412	22.9106	12.02	16.7227	33.3438	23.3352	38.9548	27.1126	26.1894	21.7105	4.62867	9.90879	4.33695	39.173	35.2525	45.6344	41.5711	35.3349	52.7335	46.3873	60.2044	28.0666	31.7818	26.305	14.2496
102.629850175641_125.205693712749___5740	0.0389307	16.404	12.1713	4.10937	18.926	11.457	6.10437	14.7129	4.72878	12.6964	6.34274	0.0480593	247.526	312.153	293.35	0.0508358	0.042614	0.0356921	0.0413265	0.0299218	0.0396735	0.0423771	0.0454262	8.6147	12.9856	14.0373	17.0199	21.5188	300.478	0.0482588	0.0425389	0.0459168	16.7707	11.7271	0.0402583	42.549
102.706902250773_756.790252661445___2191	17.1703	16.5822	12.3323	33.335	32.0469	17.4749	12.4171	14.9461	23.9997	32.2367	25.7307	10.6166	13.7282	48.0325	50.0887	22.1982	23.3179	27.3054	18.0505	16.3082	12.9798	55.5861	34.6163	38.9063	78.8472	49.6759	34.5289	32.6704	0.0539793	47.8809	32.7277	40.5268	33.919	41.5195	22.1223	86.2599
102.822640482413_414.132096178352___38	63.8072	32.9724	55.1052	45.4678	75.9898	74.7314	30.707	49.3453	61.7734	31.9677	38.1803	95.2319	522.806	431.018	455.847	430.946	539.292	470.529	324.929	455.201	384.89	515.272	520.319	447.989	236.302	126.425	249.657	235.36	92.7364	293.951	199.582	187.283	87.9732	315.804	242.034	153.714
102.958553545508_1123.06568440253__[M+K]+ 63.9896_134	607.902	758.214	526.58	495.152	522.323	549.174	639.655	511.734	606.31	694.7	723.258	493.155	1061.84	963.573	898.297	967.898	689.548	830.517	824.289	860.706	764.096	972.967	932.349	839.996	700.044	622.369	942.929	656.043	696.471	607.1	974.87	772.102	731.937	1003.09	1061.33	895.976
102.986167055371_1053.67056731636__[M+Na+NaCOOH]+ 12.0188 [M+K]+ 64.0272 [M+H]+ 101.976_3	114.283	198.69	164.949	101.922	186.767	121.033	128.572	147.644	136.87	140.46	259.772	136.468	88.3634	77.8903	178.135	111.671	124.012	132.529	113.08	129.035	104.908	102.133	161.792	130.113	356.211	284.69	187.96	192.226	287.359	270.275	298.813	278.723	222.731	242.707	259.957	419.326
103.016627906142_1187.97623296325___7970	0.0389307	90.5974	0.0558956	153.9	38.004	28.7609	0.0559893	0.0451426	0.0434681	0.0583543	95.2429	0.0480593	109.562	89.9066	44.6171	66.6044	55.7765	54.3522	44.9816	49.0986	34.6331	55.6724	89.267	47.4996	0.0597342	162.233	0.0522024	54.2531	17.2018	158.153	180.048	20.2754	179.209	41.4981	194.36	199.599
103.041412265394_389.722990527688___8023	928.639	824.984	669.431	988.285	937.609	1020.98	869.051	854.629	851.141	583.864	671.291	627.65	865.965	1000.63	1264.86	664.179	625.791	644.289	455.827	418.132	405.777	272.834	365.323	313.736	686.239	773.843	673.8	750.106	786.631	937.243	691.665	809.409	555.903	1069.7	699.527	1012.35
103.027242889568_416.674985617644___1748	25.5222	0.0751286	42.8581	4.13343	63.3228	46.0201	36.6671	0.0451426	19.0113	27.6896	44.5368	15.7796	28.6013	258.513	193.633	217.572	185.925	53.5769	225.812	67.6324	66.3179	79.4356	138.229	38.8981	123.893	154.764	20.1092	91.6565	106.113	75.8352	59.0528	30.0171	123.356	35.188	30.6118	106.662
103.054492626708_136.999462152767__[M+Na]+ 80.0617_62	5125.03	4521.58	5912.8	1927.4	1948.46	2006.02	3122.26	3581.65	3497.35	3257	2911.73	3524.25	10847	8636.98	11195.2	4012.94	5404.55	5066.65	6123.66	4867.73	4766.08	11316.9	14433.6	9859.1	13295.2	16246.5	14220.9	3957	2864.11	4621.8	9683.41	10741.7	7578.29	6409.7	3450.45	3732.55
103.055655890471_286.409977659432__[M+2H]2+ 204.083_13	1641.7	2180.03	2025.19	6719.78	7957.83	7307.53	7615.65	8080.96	7826.09	6440.82	6164.85	6198.16	619.256	744.254	658.429	648.775	432.573	372.383	1209.99	1005.9	1241.54	461.124	698.572	699.495	980.893	1280.62	1118.89	182.136	133.92	240.525	349.725	339.23	453.255	703.798	483.195	672.736
103.041675421297_453.850034690744___7910	1986.89	1911.85	1892.57	1462.21	854.225	875.478	851.986	1250.73	1030.95	485.429	576.77	655.106	639.258	631.803	722.599	396.001	263.869	263.699	278.852	178.802	206.774	273.817	302.168	282.864	546.954	1024.7	668.701	440.712	356.67	514.565	320.929	408.405	363.058	1084.84	771.228	953.035
103.056163397125_322.266874399189___2146	135.096	173.193	133.778	72.5653	44.0434	136.565	115.963	161.723	9.43895	1029.89	596.786	633.734	282.245	174.821	153.683	56.1309	65.9117	102.297	136.822	118.644	182.159	306.286	288.451	265.155	290.714	472.745	328.843	124.224	84.818	101.075	139.241	211.297	169.478	277.007	180.512	223.701
103.055244457621_367.553631790985___64	217.779	214.393	131.272	309.7	131.31	146.468	220.329	212.896	145.556	359.352	230.971	421.935	326.317	256.697	263.999	286.689	221.433	286.846	686.429	617.714	713.959	512.412	522.919	453.518	219.008	281.824	307.086	170.441	129.895	189.42	106.753	160.489	229.773	287.094	65.7677	267.053
103.041509808068_343.307910448209___4924	2157.04	1995.5	2224.94	1282.6	1139.47	1484.8	1216.83	1072.65	1427	1024.65	689.926	1083.61	996.698	690.416	796.619	385.972	283.505	155.972	117.412	119.08	75.5652	143.63	109.292	121.458	495.185	617.48	547.078	408.634	267.556	330.4	495.826	454.782	332.944	1156.78	895.361	876.339
103.08134494786_1014.07174260547__[M+H-CH2]+ 116.09_89	473.267	275.832	432.757	91.7445	537.272	684.397	286.204	364.794	731.997	431.807	570.673	148.653	279.144	480.577	336.261	144.312	134.542	131.4	134.344	154.768	211.672	209.375	143.126	227.273	358.98	432.71	251.86	288.539	428.793	324.994	220.075	216.564	348.844	253.886	178.332	404.76
103.077890151778_747.6427017726___186	193.017	216.367	98.9824	103.036	200.769	103.57	183.981	119.956	128.419	190.022	165.268	136.742	167.301	150.463	111.64	72.4779	98.1654	99.1045	63.4926	102.75	121.496	80.0531	140.866	104.015	742.113	599.794	767.924	848.396	649.685	640.522	493.129	637.361	657.007	675.499	590.867	686.023
103.087754422733_959.058198155922__[2M+3H]3+ 153.12_2	261.458	539	665.421	320.132	365.839	512.93	379.976	465.102	420.546	519.844	548.231	458.072	88.0734	152.582	95.3419	128.817	79.5327	113.101	68.1018	125.853	78.1329	51.1798	109.942	86.9392	265.477	468.747	360.052	285.307	457.173	363.811	177.311	275.096	326.101	209.63	142.088	472.469
103.076497503941_414.995395000174___38	21.2947	66.0281	85.8267	81.0895	50.7195	28.7908	61.4895	44.4641	85.6547	21.1235	19.1141	57.9412	400.3	60.0513	141.819	214.748	118.787	280.026	40.6298	319.138	60.7375	131.283	209.924	290.708	77.7259	107.324	146.44	82.5762	70.7069	44.6294	159.32	72.8719	115.866	192.31	66.9192	95.2141
103.133859868006_1101.7610597169___6604	361.426	258.332	222.624	228.963	229.935	230.832	160.85	201.964	210.61	219.323	235.226	279.297	383.86	384.869	242.499	325.662	246.528	330.061	194.915	447.298	267.155	284.793	347.552	319.826	342.847	281.951	553.499	333.192	361.894	198.881	395.049	414.61	264.107	472.935	711.289	424.153
103.167226604385_123.400021383132___7287	0.0389307	8.21454	12.191	4.12738	0.0579095	11.4778	12.2306	4.92156	0.0434681	0.0583543	0.058061	10.4942	0.0419457	611.02	0.0509082	0.0508358	0.042614	0.0356921	0.0413265	0.0299218	0.0396735	0.0423771	0.0454262	0.0395657	0.0597342	0.0645454	0.0522024	0.049469	0.0539793	0.0482588	0.0425389	0.0459168	0.0513705	0.0539001	0.0402583	0.0652299
103.209609291803_124.510070345529___7288	12.7272	24.6534	24.3859	8.23499	12.6409	0.0525653	6.10437	4.91244	4.73744	19.082	19.0282	10.4707	9.14657	0.0549343	558.171	0.0508358	0.042614	609.685	232.467	166.123	227.153	0.0423771	0.0454262	12.9493	338.403	42.1119	583.461	285.794	0.0539793	272.728	245.852	20.0134	22.4053	23.5065	242.767	0.0652299
103.283421585349_414.348895334078__[2M+Na]+ 40.1463_38	38.4492	41.2155	36.7368	41.3343	75.9898	75.4406	55.2726	44.4108	23.759	51.1482	76.3605	36.8257	47.432	234.302	151.934	236.834	136.787	122.094	153.839	66.9944	156.641	202.357	121.684	110.911	66.1046	149.523	80.7744	38.1827	71.4598	58.5156	111.607	114.072	148.137	93.8354	112.545	129.569
103.53409034802_399.048977434439__[M+3H]3+ 307.59_8	202.003	262.129	217.448	141.22	51.389	75.798	62.3419	90.1921	86.8029	77.7441	76.0472	69.3191	73.0216	47.9875	55.6449	49.8845	37.2341	27.2174	27.0009	46.1858	21.6419	36.9148	39.5309	68.3444	84.7262	58.539	51.2062	91.5672	29.4233	78.86	41.6557	55.0179	39.1647	46.8842	17.4908	42.6646
103.546287287483_416.026400804113___1749	17.0352	41.2695	80.0562	91.0458	25.353	57.5792	18.4509	19.7668	52.3573	25.6004	12.7398	52.6609	141.513	48.0269	16.7137	127.426	41.9578	92.0207	166.807	269.487	235.791	235.212	327.666	346.282	71.8191	55.0693	45.8244	43.1236	41.196	120.179	254.914	337.06	229.618	469.991	269.582	406.94
103.677951004406_1073.90965072217__[M+H]+ 102.667_55	183.502	276.373	284.663	62.4345	114.158	86.6169	116.644	78.9656	47.3514	83.1471	63.8477	47.0996	344.713	279.905	247.497	109.019	55.4586	38.9643	95.3535	58.2554	39.4141	74.5904	44.8355	51.5507	324.089	520.123	457.277	43.8265	107.291	74.8079	88.3913	50.4753	90.2627	152.936	64.177	121.995
103.729260670079_124.646843655247___7289	12.7296	24.606	24.3426	4.11653	18.8957	5.72852	0.0559893	0.0451426	9.45756	12.7194	6.34294	5.23679	264.571	336.179	292.146	305.233	241.639	205.743	0.0413265	0.0299218	17.2791	9.20927	0.0454262	30.1515	12.9647	28.0285	28.32	16.1112	0.0539793	5.25333	23.1399	24.9761	306.485	17.5907	8.76292	375.921
103.786905785624_415.55873682418__[M+H+HCOOH]+ 56.781_38	63.4584	24.7617	99.2002	74.492	31.6913	40.315	43.0521	34.5918	19.039	44.8007	19.1396	36.8627	59.6186	24.0205	44.5698	22.2024	32.6338	38.9129	247.702	166.635	246.817	126.486	367.573	230.222	97.9351	70.435	28.4973	80.9531	64.815	111.47	87.9874	269.784	202.625	497.476	204.501	330.418
103.773513025504_398.777029930407___8	199.499	320.462	177.719	200.775	96.1951	98.9548	43.5522	40.0041	56.4275	97.0199	58.1093	63.8819	45.7025	77.8917	61.1388	83.6	55.8	31.0717	85.4155	55.4637	60.5298	64.6009	96.9553	67.9299	123.692	56.2175	96.6161	48.4256	64.6592	71.6409	64.7254	79.936	89.4199	52.6756	56.784	71.0279
103.903141645673_758.929645443926___2192	29.7216	8.3034	12.3537	12.3629	12.8177	0.0525653	37.251	34.9252	9.69336	25.8266	38.1256	21.2736	13.94	30.4775	22.3143	16.9183	28.0524	11.8947	13.7549	9.9528	13.1909	37.6896	45.1975	48.2752	79.1413	49.7716	28.8748	38.2513	5.96009	37.3796	28.1021	25.4135	45.3251	101.621	52.4909	50.4795
103.948460922022_128.950799372204___125	97.1124	157.596	117.104	162.631	89.5068	127.689	30.8701	139.04	52.6107	109.353	57.7004	105.939	231.169	1990.49	0.0509082	0.0508358	0.042614	0.0356921	0.0413265	434.204	1522.29	0.0423771	1597.18	0.0395657	1383.42	353.835	289.912	206.902	297.57	912.522	0.0425389	0.0459168	134.05	154.64	0.0402583	850.466
103.958805307825_1096.86097372259__[M+H+NH3]+ 85.9203_33	25022.3	24325.4	7973.27	5971.24	8042.18	23585.3	9306.34	6135.42	5403.72	9068.77	10140.3	5744.62	19747.4	20071.5	17817.3	18160.1	17314.6	13879.4	16245.7	24675.3	15328.1	16479.8	16396.4	14605.3	12022.8	13368.8	14953.2	15547.4	14288.7	10728.1	21955.9	11548.3	15116.4	18701.4	27466.9	16731.6
103.958807905546_1054.61779437512__[M+H-C4H8]+ 159.01_3	11662.7	11219.6	9942.97	7932.25	9830.99	11136.6	10281.9	7710.66	7776.74	9723.15	11729	8375.87	13531.1	12365.4	10586.4	11838.8	11241.3	10426.5	9435.01	17852.2	10108.2	11016.1	11917.3	10440	11773.1	10925.5	13790.2	14646.4	12614	9946.71	18075.2	11204.1	11862.9	17511.3	22711.9	13897.5
104.012093861898_1199.2092899655___8358	0.0389307	8.30404	0.0558956	0.0378092	0.0579095	0.0525653	0.0559893	0.0451426	0.0434681	0.0583543	0.058061	0.0480593	55.3332	54.6475	22.4106	16.7738	23.5512	51.192	22.8552	32.9301	46.4359	23.3908	20.0588	74.024	0.0597342	127.785	0.0522024	0.049469	0.0539793	47.9792	225.518	114.505	0.0513705	223.384	231.362	127.975
104.024254873325_416.44595294465___38	84.1814	74.2855	76.9986	110.75	0.0579095	46.0769	18.4511	34.6078	80.8947	19.1997	31.8916	63.1936	81.79	18.0101	22.2852	55.5208	32.6339	58.3578	195.681	178.117	176.86	160.874	205.323	242.026	52.213	42.2612	88.6851	101.191	35.3628	26.3175	120.202	174.133	209.46	252.527	215.826	318.116
104.036884892009_340.379467734009___5209	296.244	239.113	225.067	99.1816	94.9536	132.128	73.7292	118.548	90.3904	115.008	95.6391	92.7089	368.32	292.2	407.202	173.885	154.029	182.388	157.881	187.055	174.899	46.2151	14.8019	51.8564	220.387	317.304	267.105	75.5772	117.522	147.183	157.365	122.443	33.5725	128.853	227.066	177.73
104.054841834002_293.931499507441___7203	167.681	217.02	123.931	399.528	442.783	372.674	424.919	498.591	490.767	311.934	259.143	405.763	167.134	163.666	163.378	136.529	103.571	102.326	132.303	86.2231	147.155	411.406	529.161	441.973	178.44	234.94	113.789	76.4846	89.3219	153.447	247.56	295.295	247.005	808.795	599.741	566.232
104.060741434376_137.638961885693___3000	430.022	299.644	496.935	205.896	170.586	212.219	187.033	306.805	345.579	380.41	349.99	353.51	1149.41	0.0549343	0.0509082	0.0508358	0.042614	0.0356921	0.0413265	445.097	344.374	1340.27	645.49	1016.87	1343.36	1620.33	1349.04	647.365	316.588	423.758	1931.97	990.095	633.632	585.608	529.079	732.452
104.059472694259_320.883035362106___2147	81.1445	107.661	98.375	95.4844	95.4892	69.2958	98.7199	113.992	138.492	205.137	226.302	185.115	96.6096	72.2322	104.88	77.8047	79.4075	78.022	63.3438	78.7947	60.8542	189.887	163.887	215.053	98.09	226.023	137.03	129.896	88.5932	116.199	134.808	162.401	168.841	348.851	207.433	221.329
104.105852436159_128.164818353711__[2M+3Na+K-H]3+ 102.703_125	1074.99	1174.83	1276.2	852.024	317.544	595.235	238.607	485.213	447.542	264.171	178.923	275.521	1778.62	1356.29	0.0509082	2186.59	615.865	1059.45	782.125	714.844	0.0396735	0.0423771	0.0454262	0.0395657	3620.15	0.0645454	3933.9	0.049469	1057.03	1368.86	0.0425389	0.0459168	2323.39	0.0539001	0.0402583	892.356
104.109427844202_1100.71918540626__[M+Na]+ 81.1233_56	77.5823	233.558	129.377	28.7943	203.76	240.996	124.619	24.1248	60.054	81.5845	179.328	19.2539	159.434	95.4683	219.23	16.6645	102.07	107.946	98.9181	248.918	78.0386	110.884	122.631	143.213	2020.59	2260.21	2259.56	1931.83	2080.75	1604.37	2778.03	1708.36	2117.83	2629.37	2515.84	2300.22
104.10967022753_740.886557468995__[M+H-C6H8O6]+ 279.139_71	592.813	411.949	508.16	782.4	868.683	837.93	1854.1	2077.15	1762.81	720.828	919.15	946.811	933.974	900.865	836.802	603.661	665.054	843.392	326.995	250.155	363.721	1695.32	1526.71	1579.49	2550.12	2540.32	3430.76	3201.89	2972.19	2943.74	4923.83	4000.97	3370.26	5872.81	5427.21	5374.21
104.10968576185_761.532110958005___30	462.783	247.044	389.668	446.403	374.949	436.401	866.645	900.345	878.184	418.191	373.456	548.454	634.844	627.593	577.479	341.412	352.338	492.756	154.525	237.439	178.689	1127.02	1037.29	1069.97	1932.72	1686.56	2672.85	2465.21	2309.83	2232.85	3405.88	2982.34	2668.87	4006.27	4103.18	4061.42
104.109246628984_704.108825619264___5032	62.9595	48.6852	48.289	208.065	175.183	176.214	242.481	350.061	302.338	195.608	169.328	160.718	165.733	223.422	290.972	131.48	272.203	213.954	73.1592	128.69	126.965	548.164	681.077	632.346	1066.64	1110.94	1187.6	1236.99	1078.44	977.039	1921.64	1208.05	1078.1	1913.11	1788.53	1657.7
104.110078397826_784.292810383104__[M+3H-CH4]3+ 325.328_21	156.712	90.3531	91.6049	218.97	219.874	211.369	431.696	471.062	425.861	351.721	241.747	393.246	198.129	208.462	241.472	263.381	188.076	292.543	205.846	248.416	221.452	1572.76	1716.58	2351.1	1077.35	1076.29	1417.73	1322.72	1279.38	1159.98	2723.55	2036.31	1972.58	3185.58	3039.41	2929.77
104.126349449239_412.978683294614___38	25.5535	57.7768	49.0437	53.7999	38.04	40.2885	18.442	25.2523	33.319	6.40131	19.1129	47.4041	37.1958	30.5174	22.605	50.6634	47.3865	15.7897	22.8972	43.1533	22.0186	46.8952	50.2129	18.8681	6.62264	49.3826	17.3402	43.2429	0.0539793	86.7152	29.1092	15.2399	17.0647	23.4871	43.131	61.046
104.14676824394_1073.72821992414__[M+2Na-H]+ 59.1724 [M+Na]+ 81.1576_55	191.897	285.111	196.497	82.0429	184.742	115.629	110.505	49.3535	52.0865	102.751	83.002	88.1018	347.853	158.456	181.937	84.1841	69.3233	62.4779	118.057	35.5226	109.705	79.4094	65.8401	60.1425	293.237	601.908	513.58	65.4534	93.752	139.199	51.4853	85.9227	124.52	116.16	100.595	158.177
104.259158238693_126.820341808544___5741	4.23627	8.18899	24.2554	12.3287	18.8624	0.0525653	12.4289	4.89754	9.44587	6.33979	12.9075	5.22049	0.0419457	0.0549343	0.0509082	0.0508358	0.042614	197.847	0.0413265	3.2445	0.0396735	248.739	0.0454262	12.8996	6.47312	356.847	16.9661	32.174	5.85967	10.4704	4.61743	24.931	22.2878	291.333	13.1193	368.828
104.27518120028_415.695970311044__[M+H+Na]2+ 184.544_38	34.0294	33.0156	18.3915	37.2009	12.6765	0.0525653	12.3006	14.8035	14.2793	19.2003	12.7245	5.26609	22.9302	30.0256	5.57122	27.7132	9.32395	54.4136	54.0949	91.8461	56.326	89.5438	177.562	131.394	6.52901	28.174	28.4973	32.3812	11.7845	10.5244	96.38	64.5155	33.6457	206.363	46.3348	74.8295
104.380480308159_1075.00203409009___95	150.062	283.568	203.021	103.129	133.976	116.563	135.212	88.5453	108.91	172.892	137.791	89.0517	207.254	154.07	214.236	112.249	111.075	61.6133	72.6574	89.0407	64.8959	55.296	93.3608	65.468	288.274	553.53	300.836	164.035	170.498	152.103	115.623	109.854	111.633	149.505	117.968	209.282
104.37826170281_759.188517775684___2193	16.9636	8.3034	30.8844	12.3485	19.2265	17.2575	18.6255	19.9572	14.4192	12.9133	19.0628	0.0480593	23.2333	42.6684	50.2073	33.8366	9.3508	23.7423	22.9249	23.1822	35.1756	28.218	40.1756	8.77732	39.4992	49.7716	34.5871	27.2727	17.8803	21.3209	28.1021	45.6501	39.6594	53.4771	56.8651	43.1919
104.695876011409_127.501880897566___5742	12.686	0.0751286	12.1277	12.3114	18.8624	5.71034	12.3981	9.79915	4.7164	0.0583543	0.058061	31.9986	9.08184	324.091	0.0509082	276.039	239.789	202.93	0.0413265	12.9592	0.0396735	22.9462	0.0454262	12.858	64.6503	376.917	0.0522024	10.7068	17.5489	10.4555	18.44	265.251	22.2577	23.3831	8.73175	371.501
104.856180378048_122.92572125655___7290	4.26088	0.0751286	6.09552	0.0378092	0.0579095	0.0525653	0.0559893	0.0451426	14.2163	6.38699	0.058061	5.25868	0.0419457	0.0549343	0.0509082	0.0508358	0.042614	0.0356921	0.0413265	0.0299218	0.0396735	0.0423771	0.0454262	0.0395657	364.434	383.897	290.558	0.049469	0.0539793	0.0482588	0.0425389	0.0459168	0.0513705	0.0539001	0.0402583	0.0652299
104.947393345556_336.995733006633___5262	21.347	41.2849	36.8334	29.0094	6.34513	34.5489	24.6461	4.95122	42.8583	25.6229	25.5656	5.27193	183.7	239.298	264.04	130.73	85.0887	56.2484	32.0719	62.2544	75.8356	61.1705	45.1477	17.5768	59.6971	28.5927	40.5718	21.9317	53.7724	32.104	42.4022	55.9807	28.4784	41.6853	53.434	7.22188
104.961889320985_1098.57425585886__[M+2H-C6H8O6]2+ 383.944_56	287.497	240.396	195.681	159.416	255.227	293.065	247.686	155.41	208.023	298.135	251.062	156.886	540.99	514.924	406.282	540.842	366.424	392.652	342.927	898.595	441.841	559.274	408.027	529.363	386.255	361.897	470.871	457.659	354.418	346.33	796.89	298.69	473.277	515.337	779.411	297.847
105.035728082192_227.636935286014__[M+H-H20]+ 122.04_129	18212	15496.5	14345.6	5314.61	4490.08	5529.89	1953.5	2039.44	2038.15	2180.49	2093.21	2406.05	7302.09	8313.14	8229.32	1994.21	1797.01	1763.24	1236.95	1220.7	1093.42	758.683	911.624	939.53	26329.7	33120	28560.7	6038	4890.43	6498.33	2757.6	3143.02	2420.63	2541.39	1999.31	2008.48
105.035836552531_306.11268766042_[13][M]+__60	67325.1	69017.7	64785.2	11252.2	9722.94	9154.99	4141.12	3923.09	3653.96	4194.44	3480.83	4552.58	28484.2	27020.2	25547	4092.34	4450.41	4261.18	2198.87	4093.31	2395.58	1361.74	1638.07	1564.52	73379.6	85944.5	76759.8	19646.3	15259.5	12201.2	5193.56	6354.66	4485.12	4580.13	3563.43	3868.95
105.035957465342_496.208012642649_[14][M]+__91	42710.4	40725.6	39246	10054.3	8832.87	9173.44	3920.38	4223.99	3559.48	3393.53	3655.22	3945.64	2415.81	2083.86	2325.65	364.28	436.183	368.653	437.76	506.655	410.159	211.891	184.246	257.54	120843	149307	131640	12018	9562.59	12200.8	5334.64	6223.77	4574.92	4487.11	2700.17	4168.63
105.035704265049_271.999986555491_[15][M]+_[M+H-H20]+ 122.04_90	55605.7	53470.1	52804	6680.25	4614.74	6176.19	1180.33	1207.79	295.372	1845.72	1657.51	1963.11	36303.7	31882.1	32666.4	4499.02	3971.73	3906.72	1264.5	1558.82	1445.29	606.4	905.61	901.272	73259.9	83704.9	78989.5	7227.86	5565.84	6011.82	2159.04	2787.78	1860.09	1844.68	1552.97	1479.58
105.035847606484_639.486990087684___100	3055.06	3060.44	2988.72	663.11	601.857	556.163	293.227	272.788	271.219	271.56	273.96	300.951	329.946	273.504	289.134	140.503	89.671	140.207	127.857	213.038	100.93	74.8469	135.472	110.861	14553.8	17185	16768.7	1482.63	1401.38	1533.19	640.233	850.138	629.656	849.595	362.295	652.337
105.034202139735_376.431808365229__[M+H-HCOOH]+ 150.032_40	1849.86	1888.95	1742.27	2111.32	2460.93	1905.46	1665.69	1668.39	1614.26	1550.9	1706.48	1458.41	436.662	633.004	798.705	1047.72	1071.67	853.168	502.042	525.226	419.422	296.569	414.95	458.909	2642.57	3618.05	2951.44	1680.18	1356.27	1717.01	1823.9	1754.85	1365.47	623.536	746.7	974.205
105.028596966063_130.79995135734___125	2814.42	991.219	1725.03	542.42	305.97	463.466	141.376	168	81.0453	102.44	134.003	121.27	4954.27	6597.14	14940	0.0508358	944.323	1444.5	370.104	108.442	0.0396735	0.0423771	0.0454262	117.587	4970.82	7829.71	7041.71	280.401	516.552	417.726	261.195	154.23	129.466	872.118	0.0402583	171.38
105.020785696016_437.594767557942___34	263.243	237.105	367.008	141.151	109.998	92.0733	153.744	110.469	159.302	253.547	266.086	260.919	82.6299	36.0348	39.0088	707.193	51.2747	66.8754	63.1737	68.7287	104.092	101.908	157.442	121.288	13.0436	28.1655	9.72993	37.7902	53.0239	73.9732	43.3466	78.9743	59.0017	425.436	181.59	482.421
105.0722887518_925.629468774119_[16][M]+__7	4116.9	5613.45	3707.45	3084.97	4150.16	3674.76	3681.27	3579.07	3148.11	4305.27	3797.36	4013.78	3325.88	2645.57	2624.89	2723.48	2558.12	2359.04	2532.97	2147.5	3547.34	3059.09	3393.1	2953.79	5267.25	5858.65	5022.99	4657.73	4345.38	3854.72	3806.84	4428.11	3361.57	5954.97	4506.48	5321.6
105.072498217558_876.72875605069__[M+H+Na]2+ 186.144_54	1061.01	1324.53	975.9	869.185	823.132	828.581	713.184	872.962	775.375	1082.44	693.503	729.213	753.847	865.761	673.54	743.401	592.882	665.715	694.151	543.714	751.248	758.473	800.962	749.829	1352.58	1528.5	1310.55	1087.16	1267.92	937.987	1053.96	1203.65	832.187	1740.38	1078.82	1321.59
105.073228301222_619.241481174053___22	1250.27	1249.81	1157.74	1127.34	1198.48	1098.38	1082.3	1199.35	1214.13	1329.09	1185.55	1283.12	1641.98	1527.3	1800.6	2083.18	1509.17	1651.6	1265.04	1660.86	1221.38	1511.06	1702.89	1570.83	1397.36	1375.17	1041.26	1145.22	1062.7	1128.83	1112.33	902.913	970.621	1717.43	1164.04	1098.41
105.073317847995_565.262081723671__[M+H-C2H4]+ 132.097 [M+H-C4H8]+ 160.128_53	805.467	779.811	804.538	765.602	583.775	663.552	618.398	693.771	627.888	659.132	648.029	794.873	949.001	799.954	880.637	903.045	826.501	897.274	828.3	1069.6	649.16	955.475	980.049	861.587	894.174	982.244	724.86	753.162	657.68	833.48	813.5	585.006	675.806	1085.98	838.982	816.752
105.072238726396_770.983035777282__[M+H+K]2+ 170.172_45	605.986	4589.98	1854.18	870.544	740.557	711.766	393.816	440.641	416.011	433.853	323.862	416.351	627.003	495.127	519.091	3603.68	352.576	544.314	276.387	575.492	366.03	593.399	494.798	492.021	4263.69	5952.63	1092.01	2847.55	739.799	2933.79	1973.27	621.354	1090.26	4195.05	1415.91	805.048
105.074111305483_122.933023813005___7499	80.7635	72.0949	48.7717	33.0191	25.2817	68.8759	48.9223	54.1372	23.6872	38.2336	38.1102	62.9654	531.893	0.0549343	0.0509082	293.025	0.042614	0.0356921	0.0413265	936.759	506.205	0.0423771	0.0454262	137.695	175.717	91.4175	79.5782	323.423	47.1301	89.4913	0.0425389	742.127	89.6214	58.3557	0.0402583	419.212
105.129109288426_121.679819971814___168	17.0435	8.23355	18.3358	0.0378092	12.6699	0.0525653	0.0559893	4.93499	9.50332	0.0583543	0.058061	5.25868	9.16847	0.0549343	0.0509082	0.0508358	0.042614	0.0356921	0.0413265	0.0299218	0.0396735	245.317	0.0454262	0.0395657	26.0908	7.04803	301.282	10.8069	313.021	0.0482588	250.49	0.0459168	0.0513705	0.0539001	0.0402583	0.0652299
105.177341192129_336.934253836955___5207	51.2327	41.2849	55.2501	29.0094	38.0708	28.8302	30.8077	14.8537	14.3051	12.8114	31.957	36.9035	300.121	266.52	341.884	67.7611	94.5883	146.03	22.9085	43.2311	17.5826	28.2326	45.1477	57.1246	59.6971	78.7871	78.925	43.9523	11.9729	32.104	51.8249	25.4458	17.087	11.9336	31.1698	36.183
105.206387739913_121.451288520952___8314	4.27269	0.0751286	30.5596	8.29777	6.33144	0.0525653	0.0559893	0.0451426	4.75166	6.40703	0.058061	5.27549	0.0419457	0.0549343	0.0509082	0.0508358	0.042614	0.0356921	0.0413265	166.867	0.0396735	0.0423771	0.0454262	0.0395657	0.0597342	0.0645454	0.0522024	0.049469	0.0539793	0.0482588	0.0425389	0.0459168	0.0513705	0.0539001	233.552	0.0652299
105.336830579318_124.596144338051___7291	8.47104	16.404	12.1713	4.10937	0.0579095	0.0525653	0.0559893	4.90429	4.72878	0.0583543	0.058061	0.0480593	233.257	322.699	291.839	0.0508358	0.042614	398.64	0.0413265	3.25564	0.0396735	0.0423771	0.0454262	4.30735	38.8942	378.384	28.32	5.3704	17.6064	10.5067	0.0425389	0.0459168	0.0513705	303.643	0.0402583	0.0652299
105.456705212882_633.376090830096___1297	4.26437	24.7045	61.2472	355.496	829.614	1036.21	946.141	510.401	794.794	332.401	333.113	490.006	54.9947	42.1027	16.7325	209.991	98.2286	31.2496	72.6884	29.4551	60.7787	4.63516	14.8891	21.6639	87.7919	84.7959	57.0443	219.718	356.826	832.299	498.015	1121.35	305.187	29.4439	8.78515	28.5305
105.486324665003_309.481042687288___104	226.741	218.752	248.97	37.2772	38.1493	34.6056	12.3224	9.88722	23.8368	25.6103	6.39095	15.8191	124.472	126.183	133.789	22.1904	0.042614	27.2819	27.0722	16.3654	17.3671	18.502	14.8775	8.6726	137.058	243.169	178.834	27.0344	23.5916	36.8473	41.6991	30.0327	28.0082	17.611	13.1335	7.12724
105.515818901772_127.724811234376___125	16.8914	0.0751286	24.2238	4.09834	12.5535	17.1073	6.19906	0.0451426	18.8398	12.9184	6.45373	5.31886	0.0419457	0.0549343	305.939	0.0508358	0.042614	206.321	0.0413265	0.0299218	0.0396735	0.0423771	0.0454262	0.0395657	51.7202	752.654	300.714	295.049	5.84962	0.0482588	0.0425389	0.0459168	0.0513705	313.211	0.0402583	361.139
105.579404155244_633.392047824575___1298	51.1009	32.9393	61.2473	1042.69	1636.65	2123.96	1237.19	1568.06	1577.5	647.051	767.551	905.395	27.4973	24.0587	22.31	396.359	554.616	415.977	80.1852	36.0007	73.7064	18.5406	24.8152	12.9983	65.2674	77.4852	48.8483	949.092	781.187	1758.47	758.689	1863.73	702.564	47.1102	21.9629	35.6158
105.627915114651_308.815580346361___60	279.225	278.971	337.44	82.7163	46.139	23.0058	12.2912	14.8129	23.7759	12.7925	38.2862	15.7962	149.156	95.8911	174.389	11.0849	27.903	23.3252	9.01285	13.0761	21.6525	13.8609	14.8391	12.9755	304.732	410.003	199.197	37.7522	76.4817	47.317	13.8825	19.9975	11.1918	52.7696	21.8645	14.2183
105.69967544604_633.326461454746___1299	29.8506	65.8786	42.8731	1744.39	2513.66	1485.94	1602.96	2038.76	2335.57	1093.05	1508.2	1452.12	45.8289	54.1321	16.7325	780.77	1022.91	495.372	117.216	16.3639	30.3893	13.9055	59.5565	34.6623	91.3744	106.046	103.059	1945.51	1489.98	3275.67	1090.03	2196.66	910.134	82.4428	39.5332	57.061
105.765287918961_308.13298960327___60	243.717	368.798	250.333	37.1407	18.961	40.1261	18.3801	19.6812	4.74065	12.7458	31.7995	47.2444	178.538	127.005	139.579	27.9617	23.4625	23.5373	18.1907	6.60659	13.1121	0.0423771	14.9682	26.182	348.261	282.577	286.033	98.1195	53.4964	53.1262	32.7279	25.2607	22.6199	53.3279	13.2578	14.3684
105.820981307144_633.215611170285___1300	46.9081	16.4465	55.1225	726.522	1220.5	1168.96	1231.78	1605.35	1602.67	634.482	883.755	1120.8	13.7313	36.0333	39.0425	346.972	530.327	268.204	56.2557	19.6367	43.4134	27.7751	34.6972	8.65373	110.779	69.4019	39.931	1175.72	792.438	1916.6	288.731	1763.6	1017.69	17.6382	39.4708	64.1936
105.886361802858_495.106870008285___91	166.744	66.2705	128.821	37.385	31.8469	40.4432	61.7898	49.6052	14.3386	25.706	44.8573	21.1578	32.2076	54.3234	39.1669	16.7359	28.0843	27.3628	4.53354	36.1414	17.4309	9.29452	14.919	4.34656	721.644	651.62	394.9	48.8537	23.6259	31.7475	46.4979	55.3273	61.9147	82.5625	30.8077	21.4589
105.887891151524_417.779168675679__[M+2H-C4H8]2+ 265.816_38	532.142	450.905	544.488	45.5343	44.3782	28.7981	49.2033	44.4844	28.5508	31.9999	12.7402	21.0647	50.4479	54.0301	33.4283	38.8646	27.9719	46.6862	31.6026	39.2725	47.6722	37.0027	39.5824	17.3097	58.7594	105.654	146.634	86.3711	35.363	47.3713	90.8126	65.1173	61.6849	70.4636	110.035	35.5974
105.884588718097_309.2986536718___104	302.143	247.769	222.088	41.4088	57.0763	40.2601	12.2912	29.6692	33.2862	19.2127	6.38103	47.3887	162.037	96.8968	72.3304	55.4246	18.602	7.77507	27.0386	16.3656	17.322	13.8771	9.89273	4.32515	466.782	347.906	341.092	37.7979	41.2317	52.6389	41.6974	20.0226	33.6157	41.1028	17.5121	28.4724
105.879336950919_130.939849598545___5743	25.69	16.5927	18.4556	4.15427	19.1087	0.0525653	6.16348	0.0451426	4.78344	0.0583543	12.8002	0.0480593	4.60227	335.757	333.752	0.0508358	0.042614	214.414	0.0413265	0.0299218	0.0396735	0.0423771	0.0454262	4.2764	32.7721	28.345	5.72609	270.241	17.7829	15.6462	237.13	268.967	298.428	300.463	224.777	14.305
105.933126836706_633.429673686592___1301	21.3218	16.4696	66.3707	40.3662	929.243	1204.45	705.235	2058.95	1791.12	287.24	705.529	671.657	22.9144	6.01468	5.58507	293.059	423.352	19.531	22.6011	0.0299218	30.4405	0.0423771	4.96304	8.66556	86.0686	28.1764	66.8828	209.345	347.529	1997.47	154.736	3033.17	749.744	12.8792	0.0402583	7.12316
105.957104391185_1096.66039810828__[M+H-CO2]+ 148.93_33	11342.8	9918.48	4051.84	2534.36	7931.2	4261.35	10057.2	2673.45	2472.56	10208.5	10787.5	2675.07	9297.62	9340.65	8051.13	9056.47	8409.91	6759.63	7380.01	10909.3	7691.55	7900.33	7398.5	6929.87	5683.74	5951.6	7060.46	7572.09	6948.03	5202.79	10713.3	5590.26	6607.35	9485.25	13621.4	7954.83
105.957069722933_1054.52421800405__[M+3H]3+ 314.844_3	5039.79	4772.75	3927.36	6541.94	4273.74	5852.22	4512.22	3637.11	2936.71	4879.08	5086.75	3716.76	6266.94	6104.57	5334.98	5288.1	5035.15	4843.38	4778.3	8261.9	4897.33	5081.56	5488.57	5018.67	5560.64	5533.6	6620.3	6971.96	5712.3	4652.42	8390.23	5586.08	6113.56	7914.53	10557.8	6817.18
106.03984985409_307.987250736212_[13][M+1]+__60	5741.92	5980.51	5561.04	987.408	1269.77	696.282	245.886	155.126	133.143	76.7403	205.418	451.834	2379.92	2332.16	2004.54	349.415	434.882	405.79	94.7488	239.407	222.935	55.4372	95.2555	64.7401	6832.53	7301.24	6938.42	1403.42	1451.4	2115.05	426.302	933.849	229.392	232.518	250.151	85.31
106.03971623006_272.106148391843_[15][M+1]+__90	4724.54	3188.99	4533.72	747.577	308.234	396.167	111.109	168.118	133.678	109.271	96.0863	74.0847	3183.86	2664.75	2598.99	364.143	358.317	296.823	122.007	93.2637	82.6289	23.2013	54.5229	47.7894	6649.86	7622.31	7080.92	702.256	483.97	722.711	224.247	95.3981	106.86	82.8149	107.556	91.3496
106.03994627521_495.831968422958_[14][M+1]+__91	3701.69	3646.03	3028.49	835.076	616.06	697.768	278.438	258.306	294.867	225.986	262.948	347.812	166.176	163.527	174.02	50.3639	65.1917	58.8456	54.5811	85.7206	69.8046	79.2692	64.8757	65.4252	10382.5	13234.2	11880.7	1199.88	822.998	1003.65	568.387	679.506	487.136	564.083	389.323	467.838
106.039910217283_227.045828188225___4903	1527.51	1475.77	1570.22	261.558	389.584	285.986	92.4815	295.857	119.164	128.367	115.276	265.409	665.906	847.295	758.455	116.726	102.434	77.7447	94.639	75.3015	117.584	46.3364	79.2244	30.3682	2662.01	3559.98	2908.09	503.533	483.163	527.949	128.982	127.397	208.294	185.803	147.421	133.352
106.05221445573_633.583876629303___29	72.4181	82.2378	65.8677	574.379	243.63	547.792	492.782	740.482	380.115	448.903	361.313	365.504	54.926	72.0839	33.4644	160.601	196.577	332.404	54.1779	65.4601	34.6854	32.3961	34.6958	30.2962	1465.06	1602.91	1401.11	463.963	522.8	775.76	512.254	521.418	440.161	261.222	203.66	220.818
106.053123856633_124.508560109253___7494	63.5328	40.9309	99.9185	117.76	69.3952	62.9001	85.4612	107.894	113.292	50.7857	76.1129	89.0013	634.68	0.0549343	306.789	0.0508358	0.042614	244.974	0.0413265	195.101	0.0396735	0.0423771	291.888	0.0395657	837.944	399.391	319.087	156.011	64.6709	113.109	607.258	914.965	1253.8	334.358	0.0402583	113.464
106.067138603755_351.242579818595___83	200.174	181.446	158.859	70.1909	94.9526	103.378	67.5152	103.608	133.081	117.428	95.4466	73.69	283.774	332.129	332.268	315.977	244.778	263.84	157.535	156.221	188.66	92.2253	123.379	103.694	285.416	332.871	510.189	242.539	289.57	227.097	212.034	336.715	229.294	215.924	172.39	178.336
106.053381153558_753.648010516889___5708	119.998	90.494	42.8223	154.477	127.18	109.628	277.44	256.956	287.015	122.032	152.981	135.724	96.5643	83.5784	95.1944	120.195	107.992	145.079	40.8575	68.8392	73.9966	136.97	125.174	106.834	229.75	291.325	229.097	146.866	217.673	189.991	360.626	289.225	338.743	367.341	218.441	202.221
106.088186063033_702.572635834582__[M+Na]+ 83.0985_108	425.735	470.168	373.333	604.051	504.973	468.935	191.649	314.128	368.923	361.509	378.78	399.627	407.267	627.911	473.611	459.297	461.376	418.285	401.335	534.051	456.434	490.503	589.261	480.2	29860.4	28932.8	30676.5	26908.6	29294.8	23395.1	31221.8	26903.3	27215.1	34006	32557.5	34275.9
106.074024455221_925.527568701674_[16][M+1]+__7	222.708	621.186	213.934	227.411	481.167	264.124	311.736	243.331	228.936	381.213	427.685	302.086	160.982	330.919	461.106	290.329	209.291	258.167	279.941	154.945	322.059	339.611	179.928	245.742	337.042	557.719	386.005	374.815	498.548	264.761	230.038	302.601	439.638	320.814	154.466	670.054
106.08843575564_796.585153340115___1915	190.443	180.46	152.789	165.407	182.987	166.705	67.4425	123.406	99.8108	98.8051	120.766	234.199	145.835	206.095	123.367	192.81	144.597	121.687	179.859	105.934	116.945	139.92	110.673	87.0686	4239.66	3451.44	5011.9	3955.81	4745.14	2951.38	5218.08	4759.16	4508.4	4885.23	4260.97	5468.16
106.088359728122_606.467128873256__[M+2Na]2+ 166.205_23	140.435	133.629	93.0495	62.1316	50.6853	63.2972	73.6789	93.0789	71.3606	135.022	108.109	121.097	129.687	84.1704	117.144	174.801	93.3267	145.062	82.5418	156.681	56.395	103.23	108.12	99.4863	1268.03	1317.67	1330.18	1338.02	1135.55	1113.99	1404.73	1205.68	1268.08	1648.4	1446.63	1513.12
106.105902485665_414.451240442295___38	76.2613	607.233	364.13	41.3862	63.3993	28.7908	61.7607	29.6427	42.8274	38.4082	25.4535	15.8021	87.1161	60.8032	176.66	160.792	188.246	54.4772	165.436	162.834	162.296	161.163	165.479	87.6227	273.449	255.26	425.001	268.888	160.913	299.962	160.519	234.346	320.952	95.5876	352.13	233.481
106.185605069104_633.475722447831___29	17.0575	24.7045	42.8731	146.467	111.635	323.33	192.532	189.37	193.836	198.313	47.533	214.695	13.7487	12.0294	27.8875	22.2432	98.2314	113.013	49.7224	13.0911	8.68267	23.1758	4.96304	25.9967	65.2674	77.4852	39.931	229.292	258.295	336.437	173.025	272.426	143.649	35.3326	8.78515	14.2463
106.199534606711_702.696183531418___5073	21.5337	16.6527	0.0558956	33.4885	6.41675	0.0525653	18.6975	10.0103	14.4661	32.351	6.45068	26.6539	13.7538	36.1512	27.866	27.8329	23.3694	15.6327	4.53554	19.6308	17.397	18.558	14.8856	21.6773	183.664	146.073	279.429	258.933	285.128	224.314	310.068	85.2413	208.572	179.478	348.844	314.225
106.200613901388_309.664695933313___104	154.537	173.629	181.489	41.4192	19.0489	23.0337	18.4591	24.718	47.611	32.0717	31.9048	21.1202	113.685	132.246	105.845	27.745	32.5936	15.569	13.5361	16.3654	17.3432	4.6255	14.854	8.66094	283.939	289.871	289.612	32.3983	35.3413	68.4307	27.7994	35.0381	39.2115	41.0924	39.4005	35.589
106.198370925771_495.177275507011___91	99.121	90.8541	55.1635	16.5663	31.7452	28.8018	36.9186	9.89161	19.0607	6.4072	25.5445	10.5472	18.3444	30.0518	22.33	33.3711	14.0125	23.384	4.51944	22.9289	21.6916	18.5315	14.8751	8.67473	350.505	536.535	502.603	43.246	64.7732	21.0768	50.9965	30.0915	22.4461	29.3991	35.0978	42.7342
106.252751604156_703.535091175618___5074	4.30675	8.32637	0.0558956	8.37213	6.41675	29.1567	6.23249	35.0361	0.0434681	6.4702	25.8027	5.33077	41.2613	24.1008	16.7196	33.4485	23.3694	19.5409	13.587	13.0872	17.3787	9.27901	44.6568	17.3418	135.316	161.508	138.484	167.254	125.67	104.249	177.442	165.2	124.967	224.076	162.717	86.6138
106.352609748257_415.181795763044___38	657.851	811.881	818.843	49.6012	88.6324	103.516	98.2593	64.1487	57.0348	64.0009	70.0852	47.3948	527.988	168.125	373.83	263.784	260.482	220.53	216.477	580.992	363.133	376.463	233.307	326.727	864.568	630.601	671.312	739.801	934.914	526.929	1104.67	608.59	548.577	945.577	1183.11	499.52
106.402527735791_154.024191244207___5945	0.0389307	0.0751286	6.13096	4.14409	6.34281	0.0525653	12.3139	0.0451426	0.0434681	0.0583543	0.058061	0.0480593	13.7419	12.1697	45.2015	16.8933	0.042614	0.0356921	13.7326	6.53667	4.39243	0.0423771	9.89234	13.1881	13.0695	28.2275	22.8193	21.6402	5.89814	15.8144	9.42778	5.08952	5.61616	0.0539001	4.46009	0.0652299
106.468419833727_493.247820161073___4334	33.8645	24.6028	79.1108	32.9061	18.9178	28.5995	36.6507	29.4399	28.3968	19.0791	12.6686	5.2381	13.8189	24.1431	39.2078	55.8303	4.68566	15.658	18.1563	9.86943	8.70597	13.9607	24.8925	13.0569	248.865	298.026	110.377	48.8055	41.3446	26.4296	18.4133	45.2744	50.6577	11.6741	4.35628	35.3608
106.51862881575_308.160522749973___60	163.289	156.542	112.698	16.5241	31.6247	34.4337	12.2678	4.92985	33.2231	19.1596	25.4654	15.779	50.9991	78.8698	33.8505	11.217	18.8275	23.6122	9.1221	13.234	13.1512	4.6758	24.9821	17.5093	151.429	135.202	126.981	49.1467	29.772	5.32082	46.8252	25.2995	50.9783	35.6062	18.0806	14.3905
106.545097046563_703.303647051963___5075	12.9202	24.9791	18.5791	16.7443	19.2878	5.83133	18.6975	20.0206	19.2881	12.9404	45.0672	26.6539	36.6767	30.126	27.9002	22.299	28.0433	31.2654	13.6042	42.5334	8.68935	13.9185	19.8475	17.3418	127.941	87.7314	77.5198	165.257	211.487	93.1329	127.303	213.258	161.334	207.583	144.993	173.188
106.595002507746_414.481595940843___38	340.449	658.173	629.247	147.909	120.459	92.1307	55.3406	69.1664	76.1376	57.5423	82.8279	36.8186	529.487	292.848	254.811	334.658	173.716	325.784	103.844	367.777	333.245	395.578	451.111	426.762	627.078	391.247	658.434	640.243	509.651	349.928	999.121	547.927	530.683	840.814	1126.16	833.785
106.617057945132_702.770368797556___5076	17.227	24.9791	6.19305	8.39078	12.8335	11.6627	12.4405	10.0103	19.3312	38.8212	6.43817	0.0480593	22.9229	18.0756	16.7401	33.4484	18.6955	15.6327	18.139	32.718	26.0681	0.0423771	19.8475	30.3482	207.484	106.956	100.753	96.6046	124.141	37.395	202.27	198.531	62.4934	177.245	210.887	129.595
106.725988832392_414.76740734349___38	177.144	263.781	302.587	82.5735	50.6471	34.5054	55.2086	54.2199	33.2703	51.1487	44.5436	63.1176	29.0909	42.5623	39.4867	44.3948	18.8804	15.5649	4.51442	32.684	13.1618	18.47	40.0989	26.2868	58.6854	49.2447	45.5288	32.3428	58.8511	36.7912	41.6608	30.0089	28.0028	70.3765	83.109	35.5615
106.7545542723_702.720279029477___5077	4.30675	8.32637	18.5791	16.7443	6.42927	5.84432	12.465	0.0451426	9.64404	25.8808	32.2534	5.34157	4.58459	18.0756	33.4803	22.299	14.0216	39.0817	13.6042	13.0872	13.034	23.1975	44.6568	8.67092	186.098	195.726	277.835	151.502	158.188	138.392	224.589	149.203	162.963	181.181	174.482	142.83
106.844909368825_399.040330837557__[M+2H]2+ 211.67_8	5888.44	6489.4	5978.44	5635.9	5922.96	6609.74	4343.45	4014.28	3683.42	4000.5	3420.26	4055.62	7111.86	6354.81	6334.75	3794.97	2965.55	3119.18	1128.79	1126.11	1654.37	753.805	1316.84	737.82	2040.92	2785.43	2235.49	2612.58	2028.62	2903.4	1071.55	1213.28	1042.17	901.871	373	115.761
106.908241454872_1091.00144328819___33	214.6	141.201	179.523	171.013	141.623	169.324	86.8568	109.74	105.232	122.882	122.527	170.213	2056.12	978.347	1067.78	1638.28	834.831	2002.55	974.447	3749.44	1067.72	1423.53	2000.98	1312.27	288.032	305.155	313.425	282.427	334.406	200.496	729.512	335.438	190.501	391.299	389.055	305.298
106.962736192828_400.657499226847___8	395.999	832.88	877.835	349.554	449.515	562.109	265.458	500.14	265.936	412.864	457.842	304.198	181.555	362.439	542.448	242.871	273.115	189.368	120.159	120.503	147.451	65.5937	107.402	46.0876	197.879	71.32	237.521	145.299	143.41	122.108	112.616	149.498	79.4102	91.2185	44.3316	43.2548
106.954207703758_703.449104816336___5045	68.908	41.6318	61.9305	37.6746	44.9172	46.7546	56.0924	45.0464	24.1101	77.6424	32.2534	69.3001	95.6735	84.3528	50.1588	155.864	88.8036	62.5308	54.3478	93.8855	69.5148	88.1506	74.428	56.361	171.96	230.658	175.852	102.511	277.678	106.349	251.58	90.2555	125.727	343.913	153.487	249.651
106.994577500879_1182.84105523547___7971	3302.34	1611.12	1652.81	2295.36	1286.57	1238.87	1425.64	1608.47	1854.08	1924.77	1719.63	1912.49	3069.65	2285.93	2340.79	2239.35	1680.19	2154.6	1935.91	53.2223	1954.62	1442.86	2327.34	2106.65	4669.6	4922.37	5948.64	4057.94	4268.17	3453.76	6903.36	4825.29	3743.3	7401.83	6651.94	5684.21
107.051891361256_761.884178357904__[M+2Na+K]3+ 236.215_30	1732.99	1246.85	1230.64	1476.5	1163.51	1040.55	1021.83	842.106	978.949	1293.63	1451.59	1325.54	2769.12	2762.45	2611.77	2742.39	2157.52	2495.93	2238.32	2807.27	2166.92	2349.33	2358.9	2137.89	1087.98	1113.2	1192.58	859.208	1090.17	773.626	1425.76	954.628	882.28	1137.03	1272.24	1049.95
107.051414657656_345.783840102317___4925	2944.71	2462.79	2333.3	414.983	258.303	375.677	237.175	371.817	313.34	227.471	287.232	303.432	1695.79	1477.72	1429.2	778.906	761.991	678.212	521.538	538.002	660.947	208.734	282.518	276.221	1225.69	1802.8	1408.86	566.669	554.378	647.61	605.942	631.377	572.405	634.74	295.408	385.325
107.049503148369_276.624192451468___7771	1102.06	1235.42	1255.42	112.156	160.972	86.8337	92.7679	143.806	123.579	77.2584	51.3261	111.307	710.774	642.446	677.134	223.258	163.534	197.533	108.62	84.0686	82.6919	106.865	118.99	156.433	638.442	1079.77	486.8	167.9	130.052	89.6881	191.715	140.888	67.5802	219.926	76.6599	178.3
107.048749303879_134.796715696486___2976	3230.05	2471.96	3114.27	1196.65	973.645	1112.86	1452.71	1759.6	1738.24	1473.77	1346.12	2009.72	2879.07	6610.36	4055.84	2223.86	2064.92	3624.55	2916.05	0.0299218	2607.27	3852.56	7410.55	3926.33	6601.73	10199.6	8959.04	3037.67	2103.28	3478.22	5000.67	6468.72	5994.03	3754.54	2711.31	3167.83
107.063051469837_1090.40519084334___33	6204.74	6611.8	4779.36	6274.45	5290.59	4106.28	4424.71	4292.62	5252.93	7093.27	3418.68	6434.66	198.714	161.264	87.7652	144.54	135.077	129.29	72.538	223.066	88.2581	173.831	153.139	126.561	1100.85	788.954	952.95	841.721	937.836	490.782	968.932	833.524	781.791	930.562	820.989	595.249
107.088155858555_927.551643272882_[16][M+2]+__7	8322.75	11496.5	7844.97	7607.45	8119.6	7240.31	6836.41	7430.9	6129.36	8380.1	7373.58	7436.88	6384.14	6136.91	4387.46	5212.82	4804.76	4369.13	4787.87	4407.87	6683.14	6103.38	6627.99	5292.8	11151	12400.6	10431.8	9221.51	8605.17	7711.16	8390.61	8403.28	7219.08	13067.6	9695.97	10737.3
107.088183817962_982.84562158634_[17][M]+_[M+H-CH2]+ 120.098_1	10759.1	13564.3	10778.8	9806.9	10099.4	9512.79	9219.31	9952.02	8945.82	10981.9	10142.1	10391.6	7721.51	7400.17	6641.99	8263.86	6547.85	6413.19	6970.19	5699.79	8184.89	7713.6	8892.48	7218.18	10262.6	10643.6	9448.21	8898.73	8716.24	7311.75	9114.79	8214.63	8006.42	11993.4	10375.2	10222.1
107.088092229365_886.570036450867__[M+H-CH4]+ 122.112_112	6354.82	6305.39	5771.44	5320.27	5810.96	5186.28	4979.53	5398.95	4991.2	5872.07	5704.61	5532.73	3794.22	2631.41	2876.8	3345.79	2090.77	2669	2970.66	2754.73	4278.76	3571.41	4513	3057.21	7898.4	8559.12	7588.57	6383.81	6989.58	5145.79	4849.04	6542.21	4793.36	9773.25	7408.54	8054.86
107.085356987085_398.916281569812__[M+H]+ 106.081 [M+2H]2+ 212.158_8	5428.37	7681.59	8151.36	7026.54	7379.06	6362.13	5554.1	4476.3	4714.82	4863.31	4347.59	5533.67	2899.83	7159.32	6171.63	5401.15	3986.13	3085.15	2292.79	2165.18	1876.1	1658.21	1861.66	1762.17	1907.23	2652.69	4360.66	4004.44	2563.35	3119.05	1340.93	2384.1	417.083	1836.45	1252.97	2574.28
107.087918133106_356.818093009633_[18][M]+_[M+H]+ 106.08_69	1270.1	4667.46	1679.54	964.436	842.226	821.073	910.441	827.548	1004.16	1182.51	936.076	1195.41	819.306	590.025	793.569	4601.11	373.153	457.445	691.841	841.389	512.518	768.656	919.098	880.03	9930.29	12061.8	1200.36	5315.23	889.983	5743.66	1476.33	754.947	862.711	9812.54	2777.55	1405.58
107.088102488043_619.69438834901___22	2625.77	3541.45	2929.27	3827.42	4599.21	3862.97	2585.96	2215.13	2427.77	2122.01	2401.53	3106.03	2195.14	1802.72	1648.67	2883.85	1587.44	1876.57	1383.56	1820.45	1465.26	1784.09	1707.58	1779.14	2328.87	2792.25	1470.53	1740.52	1226.97	1969.27	1648.83	1151.93	1204.75	2539.79	1834.37	1707.37
107.090248689407_705.138422460007___5057	1282.48	2769.54	1631.98	1199.41	879.776	1098.23	937.446	846.031	812.665	718.987	756.19	811.293	1004.43	775.196	748.503	2334.03	634.884	737.695	632.52	779.549	620.524	863.787	916.484	702.227	4854.28	5906.54	3381.58	3817.61	3038.44	3722.47	3283.21	2762.32	2891.6	5066.24	3379.63	3548.88
107.088205372188_800.830136096042___28	3209.44	8941.15	5260.58	1997.01	1826.26	1849.16	992.201	1381.22	1034.79	1324.25	1147.16	1430.73	1135.79	938.677	1054.02	8047.95	641.31	866.999	634.312	1044.79	821.607	1170.84	1248.95	1010.65	6811.16	8291.48	3526.74	4884.72	2338.81	10124	3439.38	1649.77	1801.41	6777.79	3400.29	1866.31
107.08803358203_786.271207066853___21	12595	17777.4	14365.6	2065.57	1533.94	1917.13	853.199	1103.26	894.723	1434.18	1226.3	1362.14	1062.49	923.795	1033.42	7084.71	595.607	860.736	655.261	999.503	661.026	989.4	1097.33	872.2	5526.05	6839.67	3375.09	4247.41	2325.53	4911.29	3256.8	1677.55	1811.09	5612.18	2787.03	1877.66
107.213724632286_404.458649007458__[M+2H-CH4]2+ 228.453_66	491.889	330.204	638.799	438.325	302.454	312.888	328.266	332.12	367.998	261.037	197.379	197.657	385.343	153.101	128.085	235.136	148.252	180.258	54.1294	39.3138	77.1222	18.4742	54.4176	48.1796	123.387	77.3683	136.765	140.002	70.5999	85.3611	87.9643	70.0239	39.1745	99.2294	52.4868	56.8746
107.247752575598_983.231251336405___1	62.9976	158.92	110.89	100.058	51.1552	210.067	195.069	184.365	86.42	276.276	269.001	275.639	95.9657	59.7759	71.8946	109.953	55.403	54.2975	80.658	32.3506	55.7178	96.374	119.929	106.405	184.626	214.131	103.464	144.053	119.224	106.161	28.1419	136.573	195.796	109.336	71.2297	206.509
107.324753539346_398.870390025647___8	2908.45	4429.9	4125.52	2652.57	2489.28	3289.46	2244.85	2123.62	2457.6	2345.55	2173.73	1677.5	3947.7	4737.99	2812.3	1831.89	2240.38	1519.05	752.906	769.128	663.457	458.336	716.534	584.084	1506.91	1461.15	1528.95	1830.81	1553.47	1207.39	540.546	837.962	532.136	352.212	166.941	195.985
107.44491449099_404.944666662604___66	228.635	248.945	415.957	202.458	237.349	251.831	110.391	165.74	123.504	134.126	90.0846	126.308	239.332	219.191	102.654	133.453	112.869	66.0216	49.4963	65.2647	51.8511	50.7406	54.2969	38.8407	131.003	113.609	51.098	118.338	81.0718	88.1818	18.4932	99.9218	44.7207	93.71	56.7865	42.6167
107.482293942518_983.500289760787___1	73.0948	168.066	105.588	74.6781	140.677	87.1871	206.583	168.55	72.0167	213.171	190.949	205.897	82.2563	131.507	132.729	99.1396	69.2537	50.4191	87.6393	42.9995	72.8617	41.3031	78.69	60.0843	157.855	277.711	103.464	81.2994	195.938	79.1013	103.187	85.9905	39.4763	89.2559	84.678	100.422
107.515355957275_128.335537054186___5744	4.22285	8.3313	30.8924	12.295	6.40747	0.0525653	0.0559893	19.5665	14.4098	6.45921	6.43788	10.6377	271.263	635.413	312.34	0.0508358	0.042614	202.668	0.0413265	170.139	0.0396735	0.0423771	267.664	34.2879	38.7452	41.9266	305.463	10.7068	11.6992	26.1389	231.936	29.8292	27.8222	311.513	243.476	7.06005
107.561613856749_399.423635021609___8	563.049	1626.78	1562.2	712.636	1040.16	1406.01	895.751	978.659	805.401	790.141	935.627	859.086	440.4	1463.48	1289.14	1184.13	812.041	362.03	256.29	251.161	479.415	231.165	435.772	166.745	875.187	657.41	283.973	811.216	531.271	545.111	213.497	421.162	328.347	158.898	211.496	191.931
107.705805761719_1072.97917001203__[M+Na+HCOOH]+ 38.714_55	307.83	293.621	186.068	117.556	85.7412	104.067	104.496	69.1828	99.5582	76.8444	118.848	104.818	325.84	261.511	262.718	77.5915	62.5175	74.7983	67.2612	67.7199	78.8281	60.6047	35.851	60.9335	434.172	400.964	463.693	60.1089	89.5936	123.429	94.1975	55.6163	129.969	65.426	113.022	93.444
107.725719424292_633.363162214625___1302	12.7931	57.6437	24.4989	82.6946	120.195	166.035	132.258	108.478	66.6992	89.5149	126.331	98.662	0.0419457	24.0587	22.31	83.4119	98.1993	111.863	9.04043	29.4551	39.072	32.4461	29.7783	30.3295	71.7941	85.4403	74.1575	105.312	64.7583	128.159	133.232	159.887	63.3989	11.7775	30.748	21.3695
107.733345539908_982.30968818812___1	63.6106	139.215	151.959	78.1289	114.273	155.949	115.67	152.449	66.211	245.955	212.131	134.183	59.4054	53.7255	71.8262	92.5945	46.1156	69.7438	49.2893	58.5742	68.4903	87.1079	98.1769	138.557	181.795	266.846	80.4988	114.412	235.685	101.71	37.5383	115.416	72.2178	154.744	57.8914	107.623
107.800708962543_399.780234094914___8	596.026	721.969	709.689	291.622	394.868	480.12	443.924	417.893	400.011	384.325	330.215	331.918	566.542	714.829	546.805	388.546	259.184	379.8	172.315	117.429	107.538	97.201	173.671	65.5898	247.616	344.352	218.963	270.622	196.494	324.671	112.683	70.7607	139.028	106.773	66.3889	122.889
107.826115638105_124.63627114411___7292	8.47104	8.18618	12.1713	0.0378092	6.29856	11.457	0.0559893	4.90429	0.0434681	6.34822	0.058061	15.6822	242.637	316.013	0.0509082	0.0508358	0.042614	0.0356921	0.0413265	172.243	0.0396735	0.0423771	0.0454262	0.0395657	336.589	56.0569	0.0522024	10.7408	17.6064	269.129	0.0425389	258.67	5.59023	333.765	0.0402583	21.239
107.936472171104_1073.08350158695_[19][M]2+_[M+2H-C3H2O3]2+ 299.866_55	448.463	263.955	126.532	37.1711	155.359	92.39	91.0554	59.2995	56.8904	121.385	44.6934	26.2045	75.7594	409.675	389.327	38.7957	48.9805	35.0679	26.3127	60.9646	77.8419	32.698	64.8741	81.622	322.009	481.383	382.351	93.6003	98.8685	149.907	23.9529	80.2571	73.6017	83.1726	29.9342	205.319
107.96269374835_1157.9638104834___8228	178.959	528.519	367.098	433.036	450.939	718.57	600.942	365.25	234.895	602.26	763.579	399.396	946.917	1433.62	1465.2	1739.48	963.375	764.426	656.222	703.412	634.901	845.797	894.974	893.863	729.65	928.286	1118.86	917.129	1139.07	738.434	485.51	656.13	1521.9	719.324	388.187	1389.8
107.961298080663_1191.07020932387___8133	0.0389307	0.0751286	0.0558956	237.331	0.0579095	0.0525653	0.0559893	0.0451426	0.0434681	0.0583543	0.058061	586.98	593.398	639.176	590.147	607.565	1341.58	174.689	394.822	404.878	491.362	582.939	722.914	620.538	0.0597342	241.368	0.0522024	0.049469	0.0539793	0.0482588	40.6694	269.13	0.0513705	0.0539001	0.0402583	0.0652299
107.949577285909_124.986205407437___125	80.4749	40.9449	18.2219	12.3281	18.8957	17.1569	12.1892	19.6172	14.1688	12.6964	12.66	36.5918	72.8684	0.0549343	0.0509082	434.925	0.042614	651.154	0.0413265	48.7479	239.33	0.0423771	247.363	77.3974	113.277	1146.2	127.231	418.891	382.235	41.9522	478.574	85.4847	378.927	532.019	247.181	176.992
107.951006632755_146.974828709989___202	241.366	90.4215	152.147	123.333	56.7818	91.6037	111.313	88.4359	113.607	127.307	25.6848	167.649	371.137	649.971	1619.76	392.844	294.114	658.593	881.608	350.932	318.789	582.539	815.859	304.651	477.121	439.955	438.289	494.528	398.081	353.804	482.315	436.333	378.126	822.352	640.572	515.596
108.037479187871_404.223527751078__[M+2Na+K]3+ 239.171_66	294.006	317.756	324.682	193.768	272.785	241.413	212.626	197.351	137.359	244.879	189.695	101.921	159.37	298.825	311.111	218.889	185.396	101.702	90.8844	85.3086	113.227	135.341	39.8969	95.9126	59.1987	188.967	114.834	205.295	130.618	151.72	74.7305	121.128	180.668	130.237	35.8099	110.429
108.054662904792_761.748854718361__[M+2H-CO]2+ 242.088_30	161.752	135.436	208.214	181.452	75.95	115.04	116.537	108.295	151.924	161.416	88.9561	120.811	233.624	288.973	291.506	311.097	215.579	209.74	227.821	152.171	177.666	315.811	270.003	304.591	118.871	122.599	153.745	166.932	170.673	98.9836	207.4	94.1938	72.7711	178.974	204.421	153.069
108.050483253975_130.337589005648___125	198.088	190.181	190.093	103.422	38.1567	75.0414	98.3485	158.695	109.65	76.8296	121.241	89.6281	475.713	0.0549343	1389.78	0.0508358	400.163	413.235	0.0413265	242.663	0.0396735	680.732	391.661	296.523	1037.98	375.213	890.669	461.54	426.005	284.282	381.136	379.24	303.963	268.975	273.538	219.638
108.08905176216_927.672032195523_[16][M+3]+__7	707.21	1248.88	763.905	564.431	966.333	836.965	899.973	684.869	563.659	988.832	881.727	843.758	574.532	714.405	766.897	697.466	449.323	482.127	624.97	380.662	593.654	681.198	534.342	548.05	1446.34	1509.14	1293.74	973.119	1629.26	899.235	1023.72	1158.18	951.895	1693.18	1208.13	1891.93
108.089563753737_982.808115778652_[17][M+1]+__1	683.371	677.541	865.491	698.404	930.554	740.536	992.127	731.808	534.369	661.923	764.797	835.626	715.204	892.407	756.299	871.917	594.82	579.731	747.063	468.998	567.046	609.434	789.463	587.709	854.717	1076.96	792.266	733.063	990.41	509.154	786.707	746.092	640.637	1027.48	1080.86	1387.45
108.083113218946_1102.82426788114__[M+Na]+ 85.0983_84	4548.92	3308.45	5065.46	3663.11	3280.4	2606.13	3349.76	2409.8	4594.22	4021.46	3368.37	5403.02	957.434	798.431	709.934	865.85	946.258	751.409	804.622	808.273	760.427	881.233	862.236	707.131	3082.71	2709.68	3269.08	2769.29	3170.45	2064.15	3339.82	2352.55	2628.37	3260.56	3384.64	3508.52
108.089970918503_357.052186353046_[18][M+1]+__69	186.658	421.124	215.158	162.91	82.5936	138.341	129.22	125.387	115.99	128.094	133.884	131.679	186.435	157.017	128.009	489.082	102.456	70.0807	157.933	175.563	108.939	124.717	133.586	146.375	1021.13	1274.08	256.596	593.002	208.729	555.871	286.541	185.31	185.825	1009.45	412.45	271.549
108.090061562775_786.454587557311___21	1335.85	2056.72	1709.79	338.081	394.581	331.803	232.326	277.991	287.571	362.709	381.244	390.801	289.428	282.948	218.194	846.331	185.582	275.837	199.344	206.089	198.925	190.811	300.655	187.63	907.331	1237.46	780.412	684.981	553.369	658.005	662.907	587.446	680.274	1144.51	859.892	771.027
108.089129634139_629.799517107495__[M+2H-C6H8O6]2+ 390.19_29	355.294	297.023	310.393	618.509	621.646	428.551	449.084	325.048	309.078	381.321	241.999	499.579	246.001	236.122	187.211	333.8	207.253	190.267	279.33	245.91	180.32	209.394	240.217	232.922	614.842	602.285	444.21	615.794	512.158	470.332	493.351	466.655	397.07	553.807	567.597	606.94
108.17830964802_1073.09068042822__[M+H-C6H10O5]+ 269.235_55	317.382	156.928	216.507	41.2511	64.5552	115.629	122.936	39.533	47.3514	121.67	179.547	83.7327	101.186	178.551	229.223	106.633	55.4586	42.9536	59.0284	38.6971	39.4939	56.0537	29.8903	42.9589	229.333	254.52	210.264	65.7126	65.5665	85.6609	65.6331	35.4583	96.2484	71.5064	56.8581	108.043
108.196812736493_633.419425982247___1303	12.7931	24.6697	6.11637	44.7881	93.6859	202.126	55.2027	126.881	80.9919	123.512	99.3066	111.587	4.5771	24.0222	27.8875	120.759	88.7249	29.8824	13.5606	13.0911	26.0138	32.4042	34.6972	21.6343	39.0985	49.3088	51.2722	141.989	17.6613	117.533	191.47	305.453	200.929	76.4322	26.3139	21.3695
108.275556502235_410.956074281149___6915	272.674	253.662	223.291	166.281	185.388	133.586	142.249	117.942	178.198	69.0955	89.1264	141.316	121.204	195.97	148.436	167.832	189.906	151.708	100.409	102.668	110.21	83.1183	133.136	104.622	72.1698	148.669	107.386	86.759	82.9103	69.1943	88.0792	126.22	78.8879	112.279	91.6075	64.401
108.317548433036_633.408004819055___1304	17.0575	32.893	18.3491	31.811	85.4026	104.823	91.6605	103.466	142.326	127.379	118.568	101.31	9.1542	36.0333	33.465	88.9727	135.004	85.7237	22.6366	22.9095	31.4388	18.5167	4.95675	26.0099	6.51642	56.3529	39.8783	169.297	191.995	216.562	120.579	319.797	121.747	23.5176	21.9282	7.13263
108.315712561979_125.239271091833___5745	0.0389307	0.0751286	6.07397	0.0378092	0.0579095	0.0525653	0.0559893	0.0451426	0.0434681	0.0583543	0.058061	0.0480593	229.191	0.0549343	0.0509082	0.0508358	0.042614	0.0356921	0.0413265	6.49972	216.413	0.0423771	0.0454262	0.0395657	0.0597342	0.0645454	16.992	0.049469	321.859	10.488	0.0425389	0.0459168	0.0513705	11.7271	4.38146	0.0652299
108.394739448791_416.135669829479__[M+H+NH3]+ 90.3622_38	259.141	295.535	302.395	102.152	65.9546	69.0951	42.9885	34.5416	33.3183	83.2012	12.7245	47.3948	22.9302	47.9806	38.9986	27.7132	18.6479	23.3201	27.0474	6.54538	12.9983	9.23498	19.7767	30.2899	32.645	49.3045	51.2951	16.1906	11.7845	15.7866	4.62901	25.038	22.4305	46.9062	55.5984	56.9709
108.441832036234_1073.55075769624_[19][M+1]2+__55	222.477	125.654	165.469	112.525	154.464	105.037	86.8326	64.8337	95.8551	142.205	122.423	95.172	201.644	96.1971	94.7743	95.074	60.7252	81.5636	80.3514	78.1421	96.0306	83.7843	79.4277	90.0997	224.904	238.304	221.497	92.4257	154.465	138.655	121.306	105.83	96.0563	128.096	122.343	151.164
108.518845957878_1123.2443141691___134	148.372	91.0247	98.9986	120.75	96.4696	110.855	86.8617	54.8278	86.11	84.0816	77.417	73.9911	113.883	136.537	71.6781	165.916	119.938	139.462	85.0447	115.575	116.563	105.972	172.528	163.806	110.03	98.2083	207.682	150.309	93.8683	84.168	236.171	162.729	188.864	183.714	236.185	176.841
108.499237060547_123.263179986552___7293	0.0389307	0.0751286	6.10987	0.0378092	0.0579095	0.0525653	0.0559893	0.0451426	0.0434681	0.0583543	0.058061	10.4942	228.664	0.0549343	0.0509082	0.0508358	0.042614	0.0356921	0.0413265	163.12	220.741	230.75	0.0454262	0.0395657	354.515	7.03212	5.68416	281.051	300.478	5.27703	0.0425389	0.0459168	5.60134	304.037	0.0402583	14.2106
108.513429961423_415.292817978855___38	288.412	403.958	329.966	154.142	88.4307	86.0395	36.7676	73.8585	85.3543	102.077	63.563	47.2368	78.6557	223.07	56.3116	226.348	56.5446	77.9297	103.315	70.5044	70.0639	65.3206	110.091	97.6653	65.993	78.3215	34.5587	81.82	17.8649	42.5568	56.2179	55.596	62.3489	53.4222	17.705	79.1808
108.75249205668_407.0861186681___3851	392.791	365.734	461.193	340.178	203.953	292.004	124.692	229.933	242.396	192.491	169.381	271.757	91.4597	167.879	162.211	138.231	111.469	100.83	58.4521	76.4816	107.918	142.538	159.361	96.3553	78.1368	133.347	85.1637	91.3712	105.677	83.9183	78.5198	159.96	122.793	198.113	114.82	49.6569
108.873205218506_405.466844727286___66	634.948	642.263	519.86	437.629	394.565	380.892	304.233	312.505	323.442	306.132	193.738	268.208	45.7791	150.112	72.3251	145.645	155.544	34.9526	58.4956	32.6713	30.2465	32.3239	34.5526	56.658	91.2844	147.356	125.033	118.338	107.892	130.23	60.103	55.0433	39.1841	35.1412	39.3137	56.8222
108.902758610603_1074.15599292984___55	583.286	263.418	380.407	201.95	197.862	212.12	147.166	118.874	152.349	127.777	204.778	141.306	2969.59	605.924	1483.74	944.937	519.676	880.835	546.239	3440.41	715.039	961.385	1011.3	1776.42	659.223	649.049	722.783	182.909	141.11	192.325	430.953	179.265	152.567	528.19	481.61	348.874
108.907816258923_1091.47284201412__[M+Na]+ 85.9203_33	526.343	434.368	477.535	281.537	281.366	300.243	184.919	178.94	200.755	205.569	263.604	225.988	3122.06	956.086	1404.36	1693.16	1192.29	1741.73	857.02	3249.7	1241.84	1523.35	1845.18	1645.48	748.729	603.156	877.089	237.355	302.044	397.492	503.373	330.17	321.294	548.162	491.117	578.226
108.964364586611_1143.18817530421___219	2735.23	2389.37	1472.74	2509.75	2226.24	1538.55	1822.76	1929.31	1714.6	2364.48	1790.5	2176.11	1618.72	2675.36	2741.27	2932.25	2400.06	2550.33	2109.84	2842.69	2183.32	2344.38	2860.09	2695.37	4257.28	4386.12	3250.5	3390.77	3487.7	2837.01	4831.53	3385.08	3292.4	5114.38	5078.47	3963.5
108.99522853105_406.081225585589__[M+H]+ 107.988 [M+H]+ 107.988_66	378.744	842.248	455.794	406.024	422.57	264.382	590.611	277.955	352.67	375.825	294.365	411.042	44.4107	135.569	189.16	176.705	116.372	77.7584	73.0358	47.6199	140.473	110.705	135.876	82.0937	143.413	91.4312	1140.18	123.876	76.487	148.582	100.793	126.15	189.703	164.741	128.743	141.331
109.030602577204_571.506182967203___7559	175.108	380.083	273.386	178.716	894.643	793.802	717.003	496.25	544.498	1197.34	1338.25	1498.48	141.851	116.39	162.231	284.904	307.922	269.37	362.773	495.631	480.686	341.906	402.313	411.15	156.771	273.949	242.158	559.561	486.756	576.571	601.876	620.073	592.647	581.112	341.663	385.887
109.029955150117_169.757776215276___8322	878.296	1138.65	839.561	2091.47	1724.79	1950.8	2453.58	2803.93	2521.49	4487.56	3957.25	4662.5	775.192	590.51	511.13	10057	4750.23	8168.57	7885.81	5117.3	6210.54	737.615	1121.43	2467.24	947.007	894.887	783.571	3611.11	2298.55	4636.99	5573.35	6547.8	4375.67	4585.4	3447.51	2784.98
109.030837414384_331.164918870298___68	6961.69	7106.56	7097.78	5602.47	5588.07	5487.07	3986.15	4530.16	4603.68	2186.11	2049.93	2290.31	1182.67	1013.51	1995.12	520.228	187.448	460.222	357.301	393.372	452.284	485.981	412.373	466.374	667.849	614.183	677.902	534.591	424.853	605.842	697.492	566.533	575.836	1214.77	766.223	976
109.030855235465_260.244790342402_[20][M]+__123	6493.45	6908.45	6680.69	3404.74	4084.82	3618.69	2362.02	2261.57	2519.72	1480.81	1483.37	1760.29	381.932	272.886	355.301	613.487	636.816	609.662	832.382	914.369	673.419	632.031	815.251	719.952	386.815	633.917	478.072	525.113	393.384	706.943	458.471	676.584	545.192	691.89	555.419	500.756
109.030787214599_455.116291025153___37	1165.77	939.564	897.263	833.858	1120.76	863.163	990.884	1001.9	1054.66	1931.05	932.268	1032.81	617.581	524.84	625.378	289.53	325.121	363.017	369.477	469.158	479.673	442.557	830.793	732.527	680.131	1054.53	769.034	623.221	440.38	742.477	747.078	754.678	606.56	2144.52	1374.44	1292.34
109.025797351626_129.750957293009___125	615.096	708.903	472.686	986.364	1001.8	838.241	1139.65	1077.05	898.9	1460.5	1619.63	1509.5	698.394	0.0549343	1967.02	0.0508358	0.042614	0.0356921	0.0413265	3303.76	0.0396735	0.0423771	0.0454262	0.0395657	866.297	824.592	645.856	1337.79	1441.86	0.0482588	0.0425389	0.0459168	0.0513705	0.0539001	0.0402583	1693.5
109.03063997828_439.774974802946___3211	2037.06	1992.5	1583.75	1163.14	1502.94	1255.44	1239.17	1402.92	1346.44	1596.18	1162.09	1426.23	733.675	613.419	669.182	406.181	369.726	455.004	329.999	447.925	384.717	650.545	702.015	591.023	646.844	937.029	780.858	588.238	482.61	688.255	866.42	853.336	731.252	2105.92	1395.09	1590.72
109.031157619212_292.078634800301___7215	1088.56	1422.84	1149.67	3052.68	2984.45	2911.22	2891.18	3600.75	5911.65	3247.33	2648.74	4692.09	301.652	308.429	341.589	734.103	695.348	641.429	408.692	496.231	571.409	363.894	532.767	516.471	234.851	395.805	368.59	496.66	348.411	456.471	584.126	646.551	570.851	1728.34	679.602	809.641
109.031673735172_485.073024281303___110	367.086	505.775	332.366	328.599	445.582	482.225	577.03	473.282	570.952	494.873	553.62	529.067	264.999	258.792	245.981	287.103	246.264	183.95	177.869	297.046	243.38	273.918	261.498	335.769	203.752	283.571	308.324	335.155	283	284.071	612.992	662.675	538.793	2381.65	1235.74	1754.29
109.07785487853_1088.24907011253___33	19196.6	19781.4	21101.2	17294.2	16976.1	15506.3	16273.1	16039.7	17248.3	20078	18401.7	19909.4	2371.65	2139.23	2194.14	2435.68	1781.68	1903.87	1313.49	1931.43	1616.35	2069.34	2330.6	1677.57	2917	2791.78	4984.93	3402.53	3230.01	1979.15	4311.43	5860.29	3523.65	5469.75	3820.04	4181.12
109.030773246126_379.655128267431__[M+H-COCH2]+ 150.032_40	1180.87	1245.67	866.245	1291.92	1444.94	1165.21	1335.98	1256.62	1421.97	1499.34	1267.02	1742.8	1278.45	1327.22	1035.23	1044.05	1123.19	940.52	745.469	908.117	766.19	883.895	1014.48	856.559	1345.37	1004.3	858.421	1289.74	1140.54	1317.86	1616.95	1558.28	1198.81	2772.71	1667.39	1986.28
109.103558631157_926.739187233419_[21][M]+_[M+H]+ 108.094_7	37149.5	43596.1	30537.4	29459.2	30923.7	28484.5	26851.9	29259.5	26709	35225.5	29975.3	30878.8	27145.1	25155.2	20748.8	20790.5	18020.7	17520.3	18030.4	16879.1	25208.5	23612.5	25839.3	22718.9	43670.7	49066.2	43000.9	37205.1	35359.5	30244.4	33425.2	35111.2	26810.2	53168.5	41222	41482.6
109.103818421715_795.593805646794__[M+K]+ 70.1408 [M+Na]+ 86.1147 [M+H]+ 108.097_146	6756.61	34733.3	15804.5	9750.57	4615.52	4506.77	2836.51	2800.49	2789.14	3179.57	2973.48	3414.96	3306.85	3050.86	2680.97	42252.1	1887.04	3348.9	1833.19	4234.6	2433.01	2898.03	2873.19	2651.96	23350.9	28940.8	13602.4	16849.4	6511.35	38316.8	25770.4	3653.03	5229.93	22016.2	10501.3	5617.87
109.103640118012_982.672935193824__[2M+H]+ 54.0493_1	36363.8	40302.1	32793.1	32796.3	31310.8	28728	28383.2	29761.9	29911.3	35754.6	32255.8	33025.5	24433.6	22020.8	19178.9	24196	18322.2	19604.7	19949.8	19431.4	22306	22922.6	25086.8	21825.8	29828.4	32002.9	29740.8	28314.4	26403.1	23336.5	29482	25213.5	22657.6	38254.7	32428.4	31292.9
109.103627823523_618.123450196112___22	7487.24	9724.2	7430.11	7901.6	7206.92	6906.4	6685.29	6323.37	6761.02	7117.56	7182.45	8064.02	12679.9	10813	10822.2	13649	8106.15	9965.29	8492.4	11717.1	8556.95	11143.4	11477.7	10787.7	10087.9	11509.4	7575.34	7704.38	7040.69	9101.39	8211.27	6036.22	6223.98	10749.3	8239.47	8175.98
109.103709619976_883.680456417623_[22][M]+_[M+H-CH2]+ 122.112_112	13929.6	16267.6	12204.6	12077	12565.1	12086.6	10198.7	11225.2	10397.7	15507.5	11188.8	13796	7051.66	6738.5	5300.24	7590.74	4770.57	5123.72	4810.64	6106.78	6468.57	6533.31	7523.05	5552.3	14084.7	16713.7	16495.8	11281.1	15279.5	13203.3	12918.9	14390.4	9009.15	22954.1	17691.5	23217.8
109.103779685128_1060.75356750038___5475	7963.22	13804.9	8392.77	6403.01	7319.36	6676.86	6641.72	6368.6	6033.01	8091.99	7485.88	7459.22	3697.31	16956.1	14734.9	20952.1	13971.3	11566	13491.8	11616.7	12935.1	12955.8	13980.2	12290.9	19748.5	24050.8	13564.4	15760.1	13156.3	15824.5	12561.7	10607.2	11032.7	15671.2	15737.8	946.04
109.214954779311_925.309217445987__[M+2Na+K]3+ 242.702_7	267.6	226.271	93.6033	180.321	190.47	142	147.494	182.785	176.085	169.032	126.207	235.738	152.015	166.77	117.518	61.752	83.7603	124.626	84.99	110.402	139.455	148.703	209.173	108.287	328.216	277.939	376.562	225.086	206.035	211.698	249.198	259.214	151.485	368.87	303.746	319.734
109.236342773681_406.725594401796___66	307.903	318.477	330.524	139.005	263.344	277.44	243.063	182.149	150.119	145.377	158.93	160.631	232.36	167.78	138.933	144.236	92.9891	73.7574	100.186	112.77	60.4973	153.981	180.218	109.696	78.137	112.407	135.101	75.3198	135.169	73.506	88.5297	77.445	135.707	166.951	139.757	156.702
109.226335097292_336.995733006633___5263	29.8378	24.7709	49.6283	16.555	19.0354	17.2744	6.15171	34.6121	14.2861	25.5914	19.1532	21.062	93.4529	267.174	211.334	117.132	104.047	47.359	32.0101	16.5938	21.9782	23.4746	15.0492	17.6125	13.2397	35.7409	11.5686	16.4488	11.9494	16.0194	18.8078	20.3152	0.0513705	29.7752	22.2193	14.4438
109.355848830188_406.874675647467___66	156.49	197.848	298.603	203.413	186.023	179.139	103.281	107.528	137.184	127.867	145.587	78.9493	84.6183	125.976	94.5816	38.7431	77.5385	46.5836	36.0147	32.671	47.5848	18.4511	39.4985	30.2457	45.6314	77.3649	68.2754	161.57	58.834	78.8437	27.7722	35.0276	5.59891	64.4408	61.1436	49.7752
109.374994593651_1073.17814421346__[M+K+NH3]+ 53.3945_55	565.683	339.091	300.327	165.123	146.701	57.8147	67.6149	89.007	89.9677	206.608	108.616	59.3882	597.207	350.439	230.088	167.002	83.3014	211.16	36.3899	191.058	101.687	51.3826	89.8993	60.1425	458.88	505.245	525.181	70.923	58.8673	171.395	70.3212	65.8511	74.4352	227.493	74.3529	108.043
109.486227650555_411.798807590653___6922	197.831	247.244	201.395	129.134	70.2835	116.02	86.7385	164.718	132.887	107.093	109.017	100.867	164.825	60.5199	78.91	83.7771	42.5423	90.0598	31.7961	69.2454	69.8391	106.192	130.128	108.251	118.425	92.285	68.901	65.2536	89.0767	84.8651	84.0583	118.059	56.5066	88.6565	74.9289	68.5961
109.473887443373_982.171912150283__[3M+3Na-H]2+ 50.3352_1	117.626	131.2	54.7722	123.654	95.916	122.712	167.095	108.207	128.013	119.679	137.559	106.753	77.6865	119.675	71.9867	78.6066	105.242	76.1307	67.2942	45.5578	86.1653	118.367	78.7762	180.97	98.8186	170.943	101.311	103.636	71.6672	53.1498	152.921	86.1136	67.7662	131.065	93.0209	122.111
109.462954459812_336.995733006633___5264	38.4246	57.7988	49.1112	16.5768	19.0605	80.7247	43.1307	19.8049	19.0734	25.6229	6.39139	15.8158	195.651	115.989	220.466	11.2935	37.3323	19.7329	4.5817	19.9528	4.33893	9.41085	9.90263	30.7594	13.266	50.1372	46.3678	21.9761	17.9594	26.7534	14.1341	10.1783	5.69567	11.9336	44.5283	43.4196
109.52290165359_1122.81131348359___6224	218.281	720.159	509.388	286.914	605.09	608.637	554.877	387.878	247.151	1441.75	673.337	308.509	406.473	324.991	330.247	303.585	299.271	302.523	266.033	295.876	227.073	332.166	347.977	288.575	487.909	411.245	349.747	401.62	519.018	349.235	383.353	329.725	406.275	341.92	344.601	539.603
109.506257230406_926.53655430895__[M+2H-C2H4]2+ 245.022_7	78.0941	158.777	115.353	78.4248	137.955	45.6593	103.783	76.1824	118.982	164.332	114.896	205.653	61.7627	125.178	117.343	124.982	93.3496	64.1183	67.8803	67.2886	77.8109	106.341	156.46	53.0758	198.898	267.358	154.61	95.4265	162.654	393.797	154.831	105.706	108.708	443.73	115.061	64.4373
109.540345904885_982.118765318358___1	220.799	164.445	165.099	156.016	214.674	166.296	153.275	142.459	146.789	200.109	188.562	240.063	133.281	119.541	158.537	159.567	139.211	107.91	193.5	116.775	107.016	155.877	206.96	107.283	288.381	236.54	218.962	203.339	153.163	175.61	194.397	167.81	198.833	282.201	205.074	258.244
109.613953998661_1072.72951622015__[M+2H-C4H8]2+ 273.279_55	302.046	266.983	228.888	71.2028	168.188	144.97	112.215	80.4751	81.7545	45.4746	136.014	90.3513	117.72	243.819	251.371	193.303	69.3346	73.0263	157.155	80.7715	38.8678	64.6683	44.2604	96.3278	248.471	353.153	300.1	71.0367	113.473	80.3037	84.4043	81.0443	67.9301	77.4806	112.114	151.256
109.632054263766_926.243711842175___7	118.579	212.234	170.981	137.169	95.9372	91.5378	115.524	170.326	198.352	120.233	196.445	253.806	142.934	145.563	111.772	130.757	84.2519	110.003	114.462	74.4367	183.674	125.167	207.817	98.1513	294.394	432.074	283.013	297.369	265.088	177.765	267.988	161.906	124.183	219.671	279.418	293.151
109.645593197319_983.282219412583__[M+2Na+K]3+ 243.989 [M+2Na+K]3+ 243.989_1	145.539	240.128	164.522	193.659	196.865	150.602	247.437	104.796	207.453	193.071	167.891	252.471	181.226	107.842	110.607	129.95	110.806	177.544	180.737	167.269	233.65	176.261	117.412	217.505	204.125	297.228	200.418	164.289	169.446	74.3125	150.243	147.745	118.429	238.299	170.588	93.2491
109.79750080547_982.132803633919___1	178.636	214.307	158.037	143.931	139.713	157.565	115.746	115.457	137.319	135.578	151.748	184.714	165.24	126.46	105.09	63.2994	101.57	115.686	50.0443	113.209	98.5443	117.844	185.222	100.86	192.969	171.003	109.187	163.445	199.391	132.718	227.791	93.565	199.952	271.213	306.369	202.028
109.826926069362_925.851587015078__[M+2H-COCH2]2+ 259.657_7	180.94	195.318	253.44	192.934	155.876	182.846	157.91	144.091	108.433	114.826	129.163	219.124	125.903	162.981	209.9	102.054	107.374	103.936	95.8199	121.454	158.132	115.716	100.584	130.484	312.472	251.875	213.97	211.254	76.8287	127.803	182.828	207.403	199.219	144.041	158.421	230.526
109.885027676491_984.147988946901__[M+2H-HCOOH]2+ 263.756_1	116.098	298.844	162.429	139.873	98.9969	118.022	276.365	89.8254	129.98	148.483	130.533	202.615	167.618	145.364	137.372	122.14	114.003	125.033	204.337	103.665	172.272	90.3101	203.38	211.9	297.207	170.92	228.382	97.1746	189.675	149.633	142.527	96.2209	152.248	142.98	123.827	178.135
109.885300343068_926.388742246708___7	142.292	249.653	97.1993	74.1039	118.29	79.9953	79.9809	148.265	99.1566	150.93	159.619	126.028	105.942	149.861	95.0066	66.8824	97.976	62.8525	112.818	59.8475	136.942	193.553	143.821	138.07	140.702	234.541	290.409	230.092	208.004	216.55	178.089	131.999	144.986	338.958	244.52	194.598
109.965660565073_1157.49669149721___8227	933.394	676.354	592.757	658.028	524.577	376.166	450.634	469.284	386.719	430.754	636.663	593.297	1366.59	1591.67	379.043	658.663	1042.27	417.816	546.172	1116.68	947.943	467.446	1434.95	1211.65	1169.31	1764.81	2311.08	1237.21	2167.99	906.676	1481.3	1514.15	1956.09	1295.27	2405.14	2303.99
109.962274442235_1200.72061019879___8393	0.0389307	0.0751286	0.0558956	211.055	0.0579095	0.0525653	0.0559893	0.0451426	0.0434681	0.0583543	0.058061	0.0480593	0.0419457	284.777	0.0509082	91.7014	0.042614	188.542	4.38377	82.5469	279.036	125.904	0.0454262	0.0395657	0.0597342	0.0645454	0.0522024	0.049469	0.0539793	0.0482588	0.0425389	0.0459168	0.0513705	0.0539001	111.413	0.0652299
109.959412196207_125.552524885645___5746	67.7803	24.567	12.1479	49.3149	37.7914	45.7518	6.23394	24.5324	14.1688	69.8485	50.7435	47.0585	136.702	1015.29	437.212	745.377	855.642	691.227	0.0413265	264.5	689.977	560.74	0.0454262	202.335	517.988	141.259	138.417	129.707	400.54	83.9043	23.0871	64.8206	100.45	48.9027	731.687	162.587
109.945222060319_418.296620318169___38	163.856	222.57	252.055	57.8678	63.3069	74.7796	49.1429	49.46	52.2805	51.1383	57.2623	31.5583	45.7967	125.779	122.419	88.7076	97.8555	58.1989	49.5876	56.0353	34.6293	23.0999	64.2476	43.2198	104.285	98.4908	34.1468	75.484	47.0817	73.5991	60.8561	40.0226	22.4029	49.641	74.8936	56.8859
110.017404895328_1123.49115745798___134	604.685	2460.18	1171.57	461.509	1795.99	1633.98	1638.17	766.781	643.046	1635.89	1898.82	702.781	1667.16	1455.82	1614.53	1797.58	1250.07	1191.85	1407.72	1411.19	1455.56	1341.5	1343.94	1459.75	1756.28	1833.95	1444.05	1651.98	1656.09	1519.49	1433.66	1318.52	1605.22	1644.66	1533.22	1953.18
110.006266124636_127.22548409075___125	148.147	117.495	172.601	104.277	178.583	104.461	123.716	149.307	153.346	271.529	83.5108	153.021	666.382	0.0549343	1069.7	0.0508358	0.042614	0.0356921	0.0413265	775.438	0.0396735	1104.94	1451.42	0.0395657	687.125	648.52	897.285	272.467	490.084	317.555	834.556	0.0459168	0.0513705	822.196	0.0402583	246.813
110.033293984016_330.077268154447___68	617.643	514.301	677.054	456.3	451.792	447.819	403.395	299.967	416.715	249.731	234.29	163.48	36.6805	83.9915	94.7213	89.1656	73.9379	77.0224	72.1243	76.9026	60.6207	98.0779	158.131	95.2892	91.5218	155.03	50.6067	168.496	52.9461	121.105	70.4185	90.1231	87.9133	183.928	40.3156	99.6999
110.032907227527_261.709325534037_[20][M+1]+__123	408.83	519.746	697.572	256.92	294.943	348.453	229.75	229.998	225.966	195.958	136.128	147.116	51.0288	72.5909	56.227	117.832	108.194	109.468	63.6311	112.465	65.6004	56.1263	73.5107	74.4336	154.986	79.2258	92.8545	144.415	77.319	63.8201	89.9153	92.0534	126.388	71.2683	82.5721	182.099
110.073803023462_1088.24442701207___33	83308.4	78666.2	74947.4	71925.2	68293.4	60499.2	68255.7	62027.3	69979.7	75718.3	70292.6	74680.5	283.426	299.311	354.033	317.213	157.414	192.274	179.047	283.986	199.886	249.355	309.175	306.831	8097.81	4685.31	10642.7	6477.61	4700.72	3121.96	9463.08	9574.54	5284.73	9737.89	9321.18	5061.36
110.098970522019_297.383626742144___6955	21.2919	771.115	85.8189	57.9019	50.6969	51.751	6.14717	34.5484	23.7864	38.3547	44.6725	57.9375	59.5411	23.9608	29.8694	1222.95	46.5049	31.1297	36.0604	49.0498	51.9563	27.7088	44.4578	51.8957	2332.12	2945.3	108.258	1093.35	100.183	1559.75	124.95	44.9921	62.7206	2311.77	470.147	42.6652
110.10707649095_926.87470664079_[21][M+1]+__7	3314.61	4430.89	3055.04	2659.2	3115.37	2925.31	2832.55	2778.65	2530.48	3612.27	2870.08	3297.65	2429.89	2518.64	2365.95	2192.61	2001.58	1753.33	1954.46	1638.72	2693.44	2180.43	2663.43	2161.19	4277.86	4710.92	4135.6	3636.16	3455.41	3261.45	3128.97	3127	2707.27	4659.34	4074.73	4213.36
110.10700781682_982.708978757987__[M+2H-C2H4]2+ 246.236_1	3352.62	4132.39	3369.59	3109.77	3296.46	2799.6	3081.95	2797.61	2735.22	3688.68	3194.75	3055.82	2183.29	2198.02	1929.08	2467.01	1992.53	1750.65	2016.89	1825.73	2480.21	2250.07	2514.59	2354.47	2851.1	3402.5	2746.13	2519.43	2569.47	2272.95	2569.09	2504.23	2311.35	3188.01	3110.47	3158.8
110.106751993055_618.123450196112___22	918.787	814.902	752.982	827.577	711.417	674.506	723.858	638.229	627.403	725.346	605.924	861.883	1447.21	1134.02	1077.99	1474.99	869.767	1035.79	844.451	1153.27	832.131	1056.12	1052.33	1022.94	1056.02	1534.89	635.746	732.396	744.75	961.831	909.799	798.474	778.881	1039.56	818.191	736.328
[truncated: 19,021 more rows]

## Sheet: G+T+U-Albedo pos
Table S4. Normalized albedo metabolite profiles in positive electrospray mode.
[truncated: 20,204 more rows]
