# Supplementary material for: Developmental Stage- and Genotype-Dependent Regulation of Specialized Metabolite Accumulation in Fruit Tissues of Different Citrus Varieties
Source: Int J Mol Sci. 2019 Mar 12;20(5):1245. doi: 10.3390/ijms20051245 (PMC6429498; doi:10.3390/ijms20051245)
Supplement: Supplementary file 1 [file ijms-20-01245-s001.zip › Tables S5 and S6.xls]

## Sheet: G+T+U-Pulp neg
Table S5. Normalized pulp metabolite profiles in negative electrospray mode.
Variable name (mz_rt_isotopes_adduct_pcgroup)	Duncan grapefruit-Pulp-20 days after F.B.(1)	Duncan grapefruit-Pulp-20 days after F.B.(2)	Duncan grapefruit-Pulp-20 days after F.B.(3)	Duncan grapefruit-Pulp-80 days after F.B.(1)	Duncan grapefruit-Pulp-80 days after F.B.(2)	Duncan grapefruit-Pulp-80 days after F.B.(3)	Duncan grapefruit-Pulp-110 days after F.B.(1)	Duncan grapefruit-Pulp-110 days after F.B.(2)	Duncan grapefruit-Pulp-110 days after F.B.(3)	Duncan grapefruit-Pulp-200 days after F.B.(1)	Duncan grapefruit-Pulp-200 days after F.B.(2)	Duncan grapefruit-Pulp-200 days after F.B.(3)	Wase mandarin-Pulp-20 days after F.B.(1)	Wase mandarin-Pulp-20 days after F.B.(2)	Wase mandarin-Pulp-20 days after F.B.(3)	Wase mandarin-Pulp-80 days after F.B.(1)	Wase mandarin-Pulp-80 days after F.B.(2)	Wase mandarin-Pulp-80 days after F.B.(3)	Wase mandarin-Pulp-110 days after F.B.(1)	Wase mandarin-Pulp-110 days after F.B.(2)	Wase mandarin-Pulp-110 days after F.B.(3)	Wase mandarin-Pulp-200 days after F.B.(1)	Wase mandarin-Pulp-200 days after F.B.(2)	Wase mandarin-Pulp-200 days after F.B.(3)	Thomson navel orange-Pulp-20 days after F.B.(1)	Thomson navel orange-Pulp-20 days after F.B.(2)	Thomson navel orange-Pulp-20 days after F.B.(3)	Thomson navel orange-Pulp-80 days after F.B.(1)	Thomson navel orange-Pulp-80 days after F.B.(2)	Thomson navel orange-Pulp-80 days after F.B.(3)	Thomson navel orange-Pulp-110 days after F.B.(1)	Thomson navel orange-Pulp-110 days after F.B.(2)	Thomson navel orange-Pulp-110 days after F.B.(3)	Thomson navel orange-Pulp-200 days after F.B.(1)	Thomson navel orange-Pulp-200 days after F.B.(2)	Thomson navel orange-Pulp-200 days after F.B.(3)
50.05535246_1067.567285___6166	62.7143	172.836	208.445	35.0998	139.505	97.5169	196.125	131.517	188.554	185.588	135.621	86.578	116.245	345.614	301.416	170.481	119.073	97.8825	427.911	49.4958	127.577	123.732	151.914	343.153	123.882	102.801	85.632	121.474	101.775	137.563	92.7161	92.147	115.834	99.5378	75.2604	121.225
50.04301373_782.7058314___8822	9.70346	0.0417716	11.6032	8.80841	8.78811	27.9739	15.4901	21.6868	12.1225	8.01208	11.3204	21.7988	7.77849	10.5719	13.9379	7.33617	13.1706	6.89739	8.19515	4.7158	12.7231	132.465	137.772	116.154	24.4847	51.0533	12.4489	35.8814	35.3018	45.4436	92.8481	53.8605	56.1235	306.257	143.735	172.374
50.06380539_977.0180565___5547	9.75521	281.285	100.149	13.2544	235.172	126.336	263.856	210.505	43.9574	153.413	167.448	226.813	120.743	388.098	114.667	562.211	224.297	237.651	202.949	28.1538	272.28	348.86	582.196	117.037	238.525	232.964	135.343	134.567	258.915	197.337	84.2665	76.8334	273.576	167.147	54.6216	153.307
50.2248319_1111.82039___14	48.686	127.596	115.238	30.8926	196.609	118.914	167.136	119.978	188.727	193.789	109.915	153.064	78.4894	137.143	270.49	175.812	143.457	135.609	224.487	53.797	145.929	106.223	109.96	231.664	71.2073	87.5936	54.0927	56.4645	57.5017	61.1893	57.261	37.4943	77.2551	44.6312	44.4224	74.084
50.23413879_978.1452807___2165	14.6647	235.235	85.0415	26.5667	217.058	73.8622	162.993	187.269	48.0725	116.244	141.853	183.388	146.728	244.695	157.555	193.155	160.304	163.426	161.299	23.5143	373.684	204.251	584.335	138.828	263.274	380.58	254.607	333.242	256.643	395.104	50.6707	409.994	216.387	174.872	198.43	235.009
50.23518706_1058.716957___4234	34.216	154.291	127.255	26.5538	152.179	108.788	157.633	114.806	107.935	116.175	100.453	86.3697	114.712	669.381	309.802	203.591	150.152	67.9562	935.512	46.9064	176.123	156.79	277.273	953.748	131.09	118.306	154.826	153.624	151.399	162.455	294.005	81.3849	144.189	100.819	58.6078	103.931
50.22335326_780.8666871___3131	0.044486	27.7198	3.92399	4.45807	4.44874	7.09309	7.86818	29.3362	16.3758	4.06382	7.64055	17.6916	2.55289	10.562	20.9125	7.33085	19.7384	11.4793	16.1412	16.4839	12.528	57.878	52.68	73.3047	12.2219	36.5637	6.21982	22.3963	25.1433	19.602	34.1017	37.0935	29.1661	127.706	71.3574	99.2947
50.3868142_783.1074672___6950	9.70346	4.56292	3.86773	13.2126	26.3643	10.4766	7.74504	7.22892	12.0908	0.0365366	18.8674	17.439	5.18566	2.64297	13.9379	4.89078	8.89354	9.19652	6.14636	4.7158	8.48208	26.2068	36.4424	41.7163	21.4241	18.0188	24.8979	24.841	8.2749	17.0413	27.5422	22.8157	17.4757	76.8156	34.104	58.7138
50.40592222_1113.918873___5259	44.4597	138.341	136.269	26.4805	135.721	80.4387	171.302	105.135	145.624	129.477	79.5941	91.2676	66.0346	130.601	290.392	149.85	173.395	119.87	258.575	35.0848	126.823	73.4893	139.786	136.124	62.8185	81.4366	41.448	39.519	60.154	41.6507	50.8853	46.8041	56.5209	76.5857	31.1914	57.9706
50.41428148_1062.700627___5199	48.9369	160.784	135.886	31.054	162.83	80.8926	174.445	64.74	96.2695	125.312	99.1058	61.1901	159.404	884.053	317.067	184.731	127.437	74.0645	281.849	41.8347	151.757	165.573	203.837	145.144	93.7827	137.345	92.517	88.8134	148.56	110.364	288.845	95.8763	109.761	118.617	38.0251	132.31
50.41361737_972.9669849___5548	9.80045	178.378	68.8923	39.5128	128.997	83.2574	123.239	81.786	35.6913	100.107	113.346	103.784	53.1442	161.815	184.02	292.773	126.941	92.7704	123.611	23.3117	167.272	136.199	192.13	116.748	238.332	413.961	171.705	152.16	195.14	389.653	67.3685	137.05	171.463	135.306	195.009	237.059
50.57784836_1111.917242___14	34.0374	261.028	114.555	39.6085	117.592	83.8383	117.235	112.672	126.555	119.336	68.1399	165.996	63.4928	271.846	330.963	353.641	223.961	224.317	258.146	159.415	177.58	116.039	220.294	236.847	166.519	145.088	155.772	113.232	201.14	132.426	163.879	116.854	96.8562	51.4419	133.665	283.987
50.64089203_421.7257085___5487	171.468	106.546	146.723	84.98	75.5497	74.5038	35.3411	65.5208	69.135	40.3827	61.3876	61.1561	22.971	28.8518	6.91744	31.7877	30.4793	31.9494	6.02253	25.8734	14.5945	27.7764	28.9298	35.8009	43.6298	57.347	46.8728	39.6949	30.1095	52.9068	19.1352	40.6094	26.7832	58.7581	20.6857	25.7413
50.66427891_407.37674___7929	24.3968	27.5625	143.199	17.7165	62.0116	102.197	23.3422	43.3714	24.2015	160.064	153.747	170.343	15.1674	20.8299	31.929	29.0844	23.7238	29.3825	25.8388	70.9271	42.2511	85.6527	99.4965	78.6297	49.3102	83.7161	34.7161	30.9121	35.2518	83.6269	28.3972	57.5325	38.3183	61.7213	13.64	44.6107
50.76203655_1111.883345__[3M-H+Cl]2- 22.5255_14	43.8268	50.3259	88.6637	39.6662	88.2288	73.4467	137.634	53.6088	79.7068	99.6923	60.6417	113.709	17.778	289.445	307.186	278.009	208.38	202.203	237.532	131.462	193.72	176.174	199.69	187.577	157.503	122.293	108.02	89.7216	143.438	181.825	145.387	69.3117	98.2542	65.24	118.549	236.092
50.76277281_839.4021004___5778	0.044486	18.2142	38.6072	8.80079	39.4061	6.99048	30.9323	21.6102	20.1236	15.9798	22.603	17.4188	7.65521	34.7848	27.9442	14.8708	8.75099	6.91845	24.1942	9.53351	12.4825	29.9935	25.4727	17.9399	64.0792	35.698	21.6566	54.8646	22.0844	51.7576	9.10505	11.4525	23.1003	29.8109	16.9592	15.9939
50.76551584_1048.84515___162	29.2916	248.37	206.67	22.1046	229.892	113.223	166.706	175.457	153.44	197.361	194.755	82.8633	275.853	557.096	265.294	232.293	126.641	79.2687	486.953	68.0095	113.072	316.231	435.001	403.198	217.977	261.155	184.925	172.838	157.756	170.061	204.134	269.937	169.571	198.332	120.463	169.928
50.84469622_405.1646022___7930	29.2677	13.7646	11.586	17.7234	22.0377	28.1267	23.3398	36.1545	56.3748	181.492	133.639	82.8413	22.7479	36.4459	29.6432	21.787	15.0976	9.04213	17.8923	73.1296	52.3289	50.3957	78.9441	76.3122	33.9061	62.6398	18.91	30.8736	13.5633	49.6331	28.4329	43.103	26.5295	61.6574	27.3153	28.6772
50.94433762_1114.329748___5247	29.5293	146.643	90.3513	31.2394	98.8883	88.3877	86.4509	93.9027	92.7825	104.809	80.4973	30.7496	64.0119	294.462	328.527	337.211	194.27	231.167	222.243	105.037	181.522	303.798	229.501	238.532	167.067	114.25	104.08	62.7694	146.498	167.93	104.934	92.4212	69.4452	72.8518	90.3777	149.547
50.94472093_1053.129076___3285	14.6782	255.404	161.991	44.2579	252.835	186.4	147.956	157.862	229.442	199.081	224.65	43.6607	162.584	855.064	246.734	173.247	139.445	93.0241	424.227	67.1535	163.108	222.089	420.86	502.691	215.416	173.444	159.421	202.453	124.8	202.709	181.703	168.133	170.81	153.293	160.092	234.096
50.94415725_923.6059792___5549	4.87985	390.481	165.665	13.27	213.916	224.53	226.439	324.312	168.026	55.9336	125.425	139.37	53.0318	165.266	165.38	77.5974	61.2103	56.7619	46.564	37.5819	91.3226	50.8714	53.6533	68.976	376.441	321.569	218.82	105.082	62.7453	155.99	45.7043	75.8398	74.989	101.588	577.459	113.883
51.03744052_502.6423939___3	114.935	61.4285	85.8984	35.4126	46.3673	80.2881	3.88573	3.61766	8.0606	11.9844	7.57166	4.34618	17.7541	10.4113	18.2916	4.83374	2.16033	13.5435	5.95592	6.97122	14.4365	6.85254	2.52778	5.05463	53.998	72.0719	53.7158	111.591	73.8285	33.2051	3.14892	8.61831	17.6677	6.84031	10.2177	12.7621
51.11441417_1049.65628___3273	43.8941	247.777	195.135	107.283	179.386	182.092	143.141	139.51	171.568	163.704	295.061	69.7084	306.162	402.862	207.612	171.892	122.15	90.3651	212.186	81.9974	155.125	166.76	289.159	497.206	238.411	169.955	225.269	189.019	129.266	161.599	158.703	206.876	151.742	211.616	116.909	221.513
51.1111995_904.4875356___5119	43.6821	205.041	84.2815	4.39744	143.594	83.6947	161.827	156.933	91.4557	71.5103	56.7205	77.9041	50.8198	105.615	188.561	44.347	39.5867	27.4798	38.4853	30.7815	52.6164	46.5915	78.7893	51.8914	375.258	141.556	348.244	95.3885	75.5384	100.958	40.3213	79.2513	82.6845	114.504	45.4359	58.6674
51.12288164_1115.49466___5239	19.6863	134.08	69.8329	4.45535	110.635	95.4598	58.5168	75.8404	60.4057	68.5448	53.6397	30.7508	43.073	187.002	411.572	279.497	144.431	205.302	168.204	65.2054	209.736	318.784	207.164	144.068	261.927	109.749	78.7321	108.975	131.663	156.67	35.2922	61.199	60.0327	31.2252	65.6019	139.752
51.12570873_930.1225469___4483	9.75746	255.546	127.114	8.84397	202.009	168.456	337.212	333.494	232.496	107.89	117.784	184.033	35.7351	183.401	157.115	75.8178	67.6748	27.2805	64.2694	25.8601	80.1523	62.3419	45.9775	56.1021	197.551	284.235	60.8947	121.659	65.5086	171.391	32.2605	77.9056	110.742	122.813	548.916	113.535
51.20563505_387.1007411___5852	14.7687	18.5735	19.4899	4.48586	26.7331	28.3894	15.7013	18.2877	32.5718	16.1939	26.7995	17.6909	10.0842	31.1499	29.5832	12.0813	10.7724	11.2772	11.8949	11.6081	18.5141	18.2842	17.7163	25.2468	27.7132	38.7049	25.1953	22.42	13.5287	30.2801	34.6792	63.2137	29.4186	51.242	20.4323	28.6411
51.21517182_502.420148___3	75.7618	82.1028	106.814	39.7925	39.5712	72.8316	15.5429	3.61766	4.0303	3.99481	3.78583	4.3471	12.6645	7.80871	9.13385	2.41687	4.32063	9.02897	3.97061	16.2662	8.24942	4.56836	12.6389	12.6366	40.1449	56.1901	35.2839	124.201	57.2095	68.4491	12.5957	11.4911	8.83385	17.1008	20.4355	19.1201
51.30392496_1116.9221___5244	29.1135	129.457	68.9199	26.6912	83.9525	45.8926	39.0111	42.7606	80.4143	194.262	38.2577	43.9294	30.8063	322.414	391.856	291.007	158.278	345.458	133.221	182.465	175.277	503.723	242.722	186.837	215.51	94.8641	57.8385	70.9943	117.379	221.609	76.883	79.9277	80.9004	54.7207	147.677	251.641
51.30368722_1046.569373___5648	43.7446	237.093	250.391	22.0061	209.827	195.58	123.464	179.165	99.488	223.038	188.425	73.8042	277.295	768.306	239.459	190.915	166.079	61.3586	346.112	87.3036	118.672	187.422	163.875	366.085	212.204	251.125	151.471	119.19	128.766	222.184	251.618	188.351	113.632	181.896	153.501	262.288
51.39400907_501.9069764__[M+2Cl]2- 32.8404_3	86.6247	78.9493	46.3058	50.819	43.968	25.3175	11.6572	10.853	4.0303	7.98962	3.78153	4.3471	10.1316	15.6174	18.2677	9.66748	10.8016	6.77173	15.8825	13.9617	14.4365	4.56836	2.52778	7.58195	24.7046	37.4862	32.0203	92.374	59.8375	30.4371	12.5806	8.61831	11.7785	3.41528	6.80187	9.57199
51.44525211_735.742016___4075	0.044486	0.0417716	3.93684	8.91321	8.92295	14.1693	31.4735	29.365	41.0904	28.4569	19.1012	4.42151	5.12867	5.34529	11.7098	9.84941	8.83364	18.3852	12.1633	9.42797	2.09494	13.94	5.1458	0.0232341	21.5882	11.8686	18.7727	33.6164	24.409	27.644	37.7186	28.8351	29.4753	63.1937	37.5596	28.3447
51.48351964_1117.266127___5267	19.409	73.8578	57.372	13.178	53.0226	48.8517	46.2255	39.1563	31.7598	59.6275	22.6897	26.3154	43.5749	238.724	341.419	179.603	137.429	294.593	114.791	161.931	165.755	429.361	175.968	155.914	104.911	109.406	53.9301	76.88	98.8862	211.787	31.6264	113.738	44.3858	85.5011	74.8732	200.804
51.4747412_1041.980583___5671	9.67878	167.619	148.566	21.9132	174.175	104.388	115.229	152.74	71.2928	142.296	158.092	64.8726	134.064	588.427	162.003	119.591	143.906	104.566	250.023	97.8308	110.017	146.833	148.818	242.689	208.957	180.899	149.141	226.126	113.25	151.461	221.662	145.206	121.689	187.342	126.268	113.859
51.5742033_502.3238342__[M-H-CH4]- 68.6106_3	58.3869	45.979	61.7324	39.7925	13.1904	28.0195	7.77147	21.706	8.0606	7.98962	7.57166	13.0585	22.796	10.4116	20.5512	12.0844	2.16033	11.2862	7.94123	4.64748	24.7483	0.0210019	7.58335	7.58195	30.8807	20.9682	31.5755	70.8229	27.1088	22.136	3.14892	11.4911	2.94462	17.1008	20.4355	9.57161
51.64250161_738.6640617___4672	0.044486	22.778	0.0352303	4.38954	4.38761	6.96821	27.0851	14.4575	8.09071	11.9925	11.283	0.0396846	0.0232039	10.826	21.378	17.4539	15.6548	9.32029	2.05268	4.7732	6.37033	16.4921	5.19983	10.4585	18.2143	17.9892	6.16579	11.0287	13.7267	28.0237	27.8294	17.0383	23.2028	53.4749	50.4398	45.0115
51.65931477_1117.167753___5274	19.409	106.171	63.0056	26.3559	57.3468	45.828	53.9298	39.1563	31.7598	43.7268	64.9326	17.5436	64.0808	182.8	219.388	168.96	157.396	182.618	111.811	160.1	135.884	258.58	133.048	148.616	107.996	91.3148	85.6537	68.3378	85.5547	158.965	136.871	210.676	154.267	78.661	122.52	150.891
51.7200171_398.2059023___1	58.5171	45.9493	61.229	53.2657	54.7174	78.7158	66.0495	66.0542	77.7134	56.0443	53.0576	43.7372	53.0848	33.8519	44.0938	12.1239	28.0478	22.6096	15.9066	11.6349	16.5028	20.6606	22.8363	30.3698	131.376	176.201	141.271	76.5584	87.3748	168.243	85.4057	92.9812	92.0502	71.9092	44.3456	47.7971
51.76202325_502.6902786___3	24.3259	18.3897	23.181	8.83949	4.39529	10.5207	11.6529	10.8499	8.05803	3.99405	7.56916	0.0396846	10.1307	7.80848	13.7008	9.66691	21.6336	13.5425	9.92741	2.32682	2.06194	2.28404	5.05515	2.52732	12.3522	20.9679	15.7883	14.02	21.7168	19.3697	6.29631	2.87365	8.83345	13.6761	3.40504	6.38977
51.84215768_1117.507557___9429	0.044486	41.0667	30.6366	17.5927	17.4524	17.4294	15.4085	17.8166	0.0365954	39.7927	15.1077	21.6772	15.4027	128.914	130.721	92.0826	115.293	66.6488	81.4663	99.695	96.8593	206.416	103.853	40.87	64.8734	79.3357	12.6894	33.7715	27.6392	125.895	25.3241	31.5962	124.503	34.2324	37.473	110.152
51.89997653_398.3782318___250	59.2527	32.6289	86.0954	35.9453	75.8969	64.1097	59.0816	69.5943	44.9928	60.8701	42.2654	57.5672	37.9287	41.6642	32.247	33.9039	17.2594	20.3479	15.8883	27.8924	22.6917	9.16075	27.9122	20.2513	98.6102	167.985	119.903	88.1959	87.8934	125.919	60.9606	96.4955	101.373	61.5695	54.5106	35.0503
52.01691385_1117.616967___199	29.1434	59.3185	45.955	13.1945	56.7924	31.4047	53.9298	35.6331	27.8194	51.7305	52.9427	39.019	28.2383	134.813	147.088	85.263	88.6523	88.2409	80.8666	96.7435	54.5942	95.9489	56.4773	61.3972	64.1519	94.5007	15.8618	53.4715	60.8061	107.687	53.8138	40.2657	41.4267	78.7344	51.0996	79.8891
52.07581264_398.6408174__[M-H-CO]- 81.07_1	1067.24	1109.04	1040.12	367.857	475.478	402.765	194.628	137.008	173.852	81.5458	91.8759	97.5904	76.7485	44.2679	163.193	33.9041	15.1026	27.1315	9.94163	11.6351	16.5028	11.464	17.7616	10.1233	710.257	833.359	713.596	185.516	138.777	203.147	70.9326	93.6053	44.2257	47.9524	37.5679	41.4746
52.08559745_420.6869486___6	752.06	964.196	1061.14	207.192	466.574	411.808	155.874	142.526	143.466	115.987	103.952	90.0474	141.122	160.562	158.506	33.8984	38.8108	13.5677	25.842	13.9701	35.0861	13.7538	15.2143	17.7277	595.169	906.094	407.156	125.154	146.091	222.074	67.5261	57.4654	70.6879	54.8032	27.2775	70.112
52.15535871_675.2390743___1293	53.4888	36.6144	27.102	4.40962	4.39867	3.50185	3.88022	0.0328174	0.0365954	4.01013	0.034555	4.36159	7.66142	5.30049	4.64754	4.90899	4.39408	6.86085	2.01958	0.0213417	4.17004	2.31419	0.0232272	2.57014	162.772	186.462	149.342	5.59296	10.9674	26.287	12.7129	14.395	2.96065	6.83363	3.40713	0.0293344
52.19640234_1050.04788___3322	9.776	142.073	119.5	35.4121	171.466	73.758	112.568	50.2376	96.9137	156.212	141.552	43.6603	85.791	179.028	136.777	126.166	135.893	75.7335	253.92	65.7353	114.638	91.4788	136.329	69.6042	124.775	132.697	89.6037	113.772	79.9461	161.79	70.9497	84.1187	94.6478	97.448	68.826	81.1548
52.25574048_398.6655989___1	883.102	852.422	994.373	324.91	341.973	353.429	133.003	128.396	108.405	72.1398	76.6045	81.7839	75.8228	59.9637	147.147	26.6389	21.6005	49.8129	17.8949	16.2891	18.5657	16.0496	12.6868	7.59244	577.566	819.437	655.181	142.155	76.4498	140.821	18.9356	90.1404	33.3764	44.3323	34.1091	35.0503
52.26457213_419.0855887___6	555.695	770.191	782.929	162.56	328.701	349.945	142.311	131.604	80.6473	112.254	99.4585	56.859	88.884	146.556	142.667	50.8909	34.5527	33.9763	15.9164	30.2936	24.7872	20.6482	27.9208	27.8816	470.638	798.51	415.64	128.944	67.9554	145.401	25.2763	45.6647	68.7962	44.5724	37.5607	54.2727
52.33007146_675.4625779___10	48.5646	50.3448	50.3324	4.40395	4.39867	14.0074	3.88022	3.61239	8.07066	4.01013	3.78342	0.0396846	7.66142	2.65025	4.64754	9.81798	15.3793	11.4348	8.06581	4.71437	18.7652	4.62837	0.0232272	12.8312	184.902	253.691	167.433	19.5753	21.9349	41.747	22.2476	25.8855	17.7488	3.41682	13.6156	9.67866
52.37380637_1049.413308___3274	39.0229	96.2431	146.315	30.9211	146.056	112.161	123.931	96.6902	100.971	119.912	155.596	65.419	64.3899	149.264	158.771	163.778	133.901	82.126	214.573	58.1551	111.107	71.3097	89.6783	83.6363	112.082	123.067	83.0309	87.9851	104.621	122.733	99.8522	92.6028	113.424	107.665	79.15	126.465
52.43816312_398.5911712__[M-H-C4H8]- 109.505_1	527.064	405.909	549.638	173.36	197.997	245.152	109.838	140.218	73.4876	101.307	64.5052	84.2946	60.6858	44.2679	15.9563	41.1692	15.0858	29.3925	13.9183	11.6351	10.3143	18.3424	35.5231	15.1849	340.353	372.216	421.633	110.602	89.5664	109.1	52.6617	43.1263	32.4322	41.1021	17.0546	25.4911
52.42344232_326.0084579___2286	14.6409	9.19074	11.5981	22.1618	17.6145	7.03294	7.77887	7.23178	36.2228	4.01456	11.3936	0.0396846	23.1215	13.2286	18.5182	9.71976	6.57344	13.7942	3.98309	2.33409	2.0663	2.32774	15.4618	10.2902	21.9532	15.2055	32.1742	90.9535	74.4203	112.455	31.7485	62.2779	32.9726	41.8224	13.872	22.6932
52.4442229_420.743205__[3M-2H]2- 35.6325_6	251.798	184.652	225.269	75.4467	98.8103	175.506	78.3855	82.4618	36.0355	52.2694	61.0272	8.68453	68.635	75.5703	71.572	26.794	32.5276	15.9195	25.9898	21.057	18.6836	18.4443	12.7577	25.4738	143.567	233.544	72.2944	89.0868	65.4533	61.4886	46.5888	43.2962	47.3971	27.5735	24.0002	48.0784
52.51826928_674.9577086___1294	58.2776	102.711	87.5193	0.0402612	4.40484	10.5201	7.77146	3.61717	4.04031	8.03105	0.034555	0.0396846	12.7848	7.95991	16.2664	4.90899	4.39408	9.1595	12.0987	7.07155	8.35058	0.0210019	10.2391	5.13249	114.642	189.983	159.516	27.9648	10.9674	22.2651	19.0694	17.274	8.87442	20.5009	13.6156	6.45244
52.54619823_1050.113957___3286	39.0229	100.709	138.458	26.4787	105.294	129.687	116.185	125.223	119.682	163.727	151.657	69.7089	124.687	140.371	105.824	149.669	194.305	118.722	207.893	72.8744	153.938	111.541	156.945	155.128	146.405	96.9078	118.139	150.096	71.5003	164.396	101.189	100.665	136.96	147.52	82.5115	119.486
52.60985618_326.9294185___5948	9.74857	13.7726	11.5837	0.0402612	13.195	28.0972	15.5389	18.0573	12.06	12.0429	11.3936	13.1133	23.0798	23.7618	27.7773	9.84588	13.1232	16.063	12.1056	14.1864	8.37297	2.32774	12.8613	2.56723	21.9532	21.2447	22.477	53.6635	46.696	88.531	33.0745	46.9259	44.9621	41.7394	27.7386	22.6523
52.61578861_398.7965671__[M-2H+Na]- 31.6374 [M-H-CO]- 81.6117_1	253.684	223.148	284.139	57.7815	129.237	73.8654	58.3484	66.0542	61.3527	44.0854	49.3275	65.6058	32.862	15.624	22.7947	29.0606	23.7327	15.8267	13.9183	13.9793	18.5657	13.7568	17.7616	12.6541	142.514	226.447	141.511	52.5158	40.6729	57.8953	28.4385	23.0261	26.5696	27.4014	13.661	9.55941
52.62486398_423.6723461___13	34.5962	66.1059	84.0547	22.4267	44.5824	64.197	19.6975	36.0354	24.1538	8.13154	30.7941	17.6899	28.1877	26.0051	25.1058	16.9392	12.9478	15.8142	9.93315	11.6382	10.3162	2.29072	15.2006	12.6515	21.8894	53.8353	19.1731	28.4455	24.4149	30.7217	25.6009	14.5489	26.8755	34.6807	10.3747	16.1646
52.69961104_675.3825032___1295	72.847	89.1979	87.6681	13.2118	0.0400679	14.0074	0.0353867	0.0328174	4.03533	0.0365366	3.78342	4.35534	5.10762	10.601	6.97131	9.81798	6.58103	18.2956	2.01645	4.71437	4.17004	11.5709	2.55607	5.13249	83.2572	123.306	98.1221	22.3718	24.6767	32.6782	19.0694	20.1332	29.5814	20.5009	23.8274	19.3573
52.78583938_323.6076074___2287	4.95078	13.9817	35.2847	35.9613	17.8671	21.3976	11.8362	10.8482	24.1454	12.2158	3.85117	13.3039	12.6508	15.6309	22.8005	7.27313	12.9529	4.52804	5.96659	2.33107	4.12244	6.87864	5.07568	7.59759	15.4404	26.9403	22.1574	33.7412	16.25	72.5122	31.6996	37.502	20.6846	23.9926	10.2548	37.2495
52.79113548_475.8796338__[M+Cl]- 17.8218_2	160.619	202.081	126.726	58.5716	91.9746	70.4938	19.4963	21.7393	16.1848	20.0199	38.0666	22.1635	15.1866	23.3948	29.6462	16.958	10.81	20.322	11.9258	13.9783	12.3791	6.85954	10.1346	15.184	305.696	216.935	240.035	64.7237	68.938	81.567	18.9173	47.3145	29.4357	37.6426	10.2308	12.7724
52.88563832_675.3992237___1296	33.9952	45.768	59.2236	8.81925	0.0400679	7.0037	3.88022	3.61239	0.0365954	16.0405	0.034555	0.0396846	0.0232039	18.5517	16.2488	12.2725	6.59111	6.86085	2.01645	4.71437	4.17004	2.31419	7.66821	10.265	142.833	92.4381	127.283	25.1683	27.3799	34.2448	19.0694	14.3713	25.276	10.2504	30.6352	16.1082
52.90492484_1116.187778___5261	19.6863	69.3518	54.3145	17.8511	61.9554	35.4157	27.3963	32.503	24.1623	48.3846	49.8936	39.5367	37.8427	214.568	183.948	87.904	104.634	84.6553	132.348	34.9982	49.5473	116.343	43.0818	41.9288	75.1233	93.3807	45.1265	34.2336	46.4201	74.8573	48.1257	37.8851	39.0966	27.7558	41.4328	51.455
52.90593184_1050.353978___3287	58.6449	110.09	111.856	30.9796	153.879	145.144	133.842	93.1854	123.929	96.1297	159.521	82.9563	149.547	162.811	130.806	133.851	116.665	113.917	189.652	70.4312	124.664	106.335	126.172	91.5615	134.176	142.479	167.843	99.7725	99.2205	80.9956	116.115	108.814	144.518	164.149	68.9135	103.888
52.97438298_323.9697558___2288	44.557	9.32116	11.7616	8.87389	17.8673	14.2652	31.5633	21.6965	12.0727	8.1619	3.85145	8.75515	12.6659	15.6485	11.4136	4.8547	6.4839	2.26666	1.98649	0.0213417	6.19088	6.88664	7.62394	10.142	9.27574	17.9831	3.16148	11.2331	18.9817	26.6646	18.9958	28.8108	14.7562	30.8093	13.6569	9.58645
52.97311281_475.7912183__[M-H]- 53.9791_2	39.2255	114.63	202.439	17.7795	30.9369	35.2469	35.0933	28.9858	8.09238	20.0199	19.0333	13.2981	20.2488	20.7954	6.84142	9.69029	10.796	13.5698	1.98763	13.9783	4.13206	9.15805	15.2225	10.1227	266.47	156.657	251.659	64.778	39.078	35.9048	15.786	37.3789	17.685	51.3984	17.0513	22.3517
53.08624194_974.5394474___75	9.84559	294.969	171.635	17.812	168.746	393.074	658.286	327.379	136.306	157.229	351.522	563.853	126.208	80.2757	256.473	55.8504	55.2321	117.067	67.3034	21.0035	99.3255	111.272	101.714	167.307	405.57	320.365	191.798	158.824	220.48	122.407	57.8886	402.747	236.285	356.011	55.0428	134.816
53.06633924_675.2390743___1297	4.86262	50.3448	30.9738	0.0402612	4.39867	10.5056	0.0353867	0.0328174	0.0365954	4.01551	3.78342	0.0396846	5.11465	7.95074	6.96376	7.36349	6.59111	6.86085	0.0182778	0.0213417	2.08502	6.95248	10.2411	5.14028	77.3916	95.5322	108.373	36.3542	13.6899	30.4886	6.3626	20.1198	8.88196	13.6673	6.81425	12.8865
53.09599699_955.2766576___8432	4.85002	124.845	65.9453	8.79306	57.5402	154.566	200.206	101.099	28.1661	48.3482	96.3642	100.937	719.567	387.644	1504.89	100.607	600.129	259.987	637.417	16.3407	462.914	433.094	300.737	697.718	133.578	316.316	63.8086	56.5943	189.363	240.024	44.1351	90.7046	83.7589	123.275	199.643	55.1905
53.15091633_475.7268473___2	73.5479	78.3154	82.8849	66.673	149.449	140.947	81.1945	76.0877	89.0162	36.0358	41.8733	39.3657	22.78	28.5937	29.6462	12.1129	4.31841	24.8779	7.96131	30.2863	12.3962	18.3161	22.8338	25.3422	148.996	106.931	140.682	43.4835	18.96	54.7794	18.9432	25.8777	11.79	30.8391	20.4615	19.1586
53.14305244_323.1898101___2289	29.7047	33.5751	23.4763	8.99032	22.3339	39.229	7.89078	11.0048	24.4478	8.14387	3.85117	22.1731	15.1809	18.2361	20.5459	7.28246	6.47644	2.26402	0.0182778	16.3175	4.12738	4.59263	7.61352	2.53571	21.6422	20.9536	12.6614	11.2471	5.41667	19.3308	9.49816	20.1635	8.85387	10.2826	10.242	6.38255
53.21076255_501.6744462__[M+Cl]- 18.2481_3	531.627	307.745	348.057	155.73	89.5915	214.454	3.89189	7.23532	4.0303	3.99481	0.034555	0.0396846	12.6645	7.80871	13.7008	4.84036	4.32063	4.51449	5.95592	6.98087	4.12471	2.28418	5.05556	0.0232341	12.3523	20.9682	9.47265	11.2023	13.5552	13.835	9.44676	17.2366	11.7785	6.84031	3.40508	6.38133
53.26709319_974.7603374___75	19.6293	360.153	138.211	17.812	119.342	427.818	570.176	417.489	153.732	108.514	246.417	416.814	157.225	100.163	246.188	56.6586	87.0241	95.4453	65.8121	39.6316	96.8623	113.519	126.786	176.11	260.649	323.609	201.238	200.427	269.49	141.36	35.3764	346.911	245.483	395.909	106.645	195.225
53.27575981_954.4054157___151	9.71057	138.947	66.0551	22.3098	57.6371	196.368	189.319	87.4106	78.9752	36.3302	103.511	105.504	684.584	416.132	1388.14	73.8976	680.837	269.576	620.475	25.7079	518.682	441.489	333.302	709.214	115.693	269.156	73.4695	97.3284	205.744	308.8	47.3333	49.4383	68.3193	103.863	62.063	97.4745
53.26663254_1115.793268___5214	29.1761	74.2374	49.8922	44.074	79.7912	38.9573	35.2239	32.1144	35.8553	31.91	34.5418	17.6343	40.5838	172.599	183.056	85.8241	78.568	56.4045	87.5032	46.8776	81.1093	96.3649	78.6033	68.2619	52.5686	66.2787	35.4565	45.793	49.2195	61.0635	34.9143	37.4285	33.0818	44.5563	40.9828	54.6709
53.3227813_475.7328557__[M+Cl]- 18.3554_2	24.4831	36.8543	70.7055	84.3102	79.5519	95.0504	73.9749	66.094	98.4129	31.9924	30.4159	17.4716	12.6555	5.19885	11.3897	7.25766	0.0198348	11.2937	5.96306	13.9599	6.18851	6.85986	12.6656	20.2428	52.3731	50.8797	63.2302	22.4305	13.5429	16.5714	15.7651	22.9729	5.88699	10.263	20.436	6.3762
53.33310798_323.274375___23	9.88301	23.2606	42.9645	13.4616	17.8348	32.0378	27.5676	10.985	12.2027	16.2587	7.68803	8.85477	10.1095	13.0149	4.56043	16.9709	19.4089	2.26161	5.95341	2.32808	6.18384	9.17448	7.60517	12.6637	6.1743	17.9391	3.16132	14.0247	13.5264	5.51657	15.8123	8.63178	2.94793	17.1159	0.0313307	15.9376
53.39686435_501.9699947__[M+Cl]- 18.4285 [M-H]- 54.4028_3	525.571	193.456	501.08	155.394	75.8148	114.327	3.88573	0.0328174	4.0303	0.0365366	0.034555	0.0396846	10.1316	15.6174	0.0209605	4.83374	4.32063	0.0207037	1.98531	9.30782	2.06236	4.56836	7.58335	0.0232341	24.7046	20.9682	9.47265	11.2161	10.8442	5.53401	6.29784	2.87277	5.88923	0.0314148	0.0313307	9.57199
53.45289439_975.2484893___75	4.91477	217.215	103.894	0.0402612	97.3938	264.062	327.971	250.475	81.136	166.439	162.395	273.604	51.0947	98.8932	164.972	92.2707	143.975	43.2849	87.8989	25.671	109.565	93.3415	74.2239	79.9878	321.433	353.843	293.991	260.112	214.042	188.851	35.4423	358.794	202.361	307.889	41.2821	124.435
53.45798177_955.3721623___8433	19.4001	87.8539	38.3269	0.0402612	61.9664	130	138.562	93.8772	44.261	39.8081	56.7091	65.8287	383.772	291.252	855.712	276.905	347.969	163.862	341.034	32.6813	396.758	314.016	264.116	353.274	111.261	172.567	86.1416	101.87	296.893	262.832	25.1989	87.4989	50.4482	107.566	30.5707	61.0344
53.44825596_1114.525434___5254	24.6488	92.6256	38.8611	26.7767	44.3284	46.1233	35.2239	47.0301	52.4409	80.776	30.7607	30.8031	50.7331	198.309	103.537	96.8184	116.259	74.7939	70.5362	71.6067	74.6154	96.3559	94.5825	87.6613	65.8463	87.3561	25.7865	51.4383	60.0731	66.5398	45.0034	64.2393	42.1041	52.1283	24.2104	64.3187
53.52662326_399.425254___1	24.6113	27.8634	42.9128	26.8651	40.0491	21.2972	43.1859	25.5933	36.6806	16.1803	30.6416	48.5474	17.8813	15.7855	16.1302	16.9143	17.4408	15.9924	23.8361	18.5754	16.6766	29.7655	35.4848	46.047	59.1704	57.3846	47.7909	25.535	13.7046	32.0559	38.269	46.4633	32.7722	34.6049	51.6968	35.4185
53.57647664_501.5084634_[1][M]3-__3	223.694	137.29	205.973	80.2385	34.5796	31.5692	0.0353867	0.0328174	16.1212	7.98962	0.034555	4.3471	12.6645	2.6029	4.56693	2.41687	21.6032	4.51449	3.97061	6.98087	4.12471	2.28418	0.0232272	10.1093	0.0283566	14.9773	0.0290008	8.41211	2.71104	19.369	12.5957	14.3639	5.88923	6.84031	6.80187	6.38133
53.6034625_730.3247121___7577	4.8386	4.56008	11.6391	8.79404	8.79375	3.49276	23.2651	3.62047	8.09724	4.00879	0.034555	13.0746	5.12979	8.00959	7.03203	4.92402	4.41572	6.90074	2.02675	2.3578	4.19391	4.65265	5.14761	2.58139	21.3335	23.8133	6.18043	33.2358	10.8481	30.4631	27.9473	22.815	20.4283	13.478	6.75217	52.175
53.62744031_1073.646659___41	1915.95	144.048	263.184	62.6112	158.4	124.724	127.142	73.8721	140.595	135.37	65.446	66.2736	81.4425	421.892	159.293	209.339	130.559	99.7352	188.76	70.2558	135.681	107.251	139.984	170.82	96.5968	90.7655	98.6046	75.4465	93.4325	92.0834	48.2013	85.5483	54.4693	62.4631	55.0632	209.688
53.6433666_956.2094954___8434	0.044486	50.2546	68.9116	8.79306	39.3615	69.8669	73.3724	49.8884	27.8301	59.6458	30.2449	43.3625	226.463	130.184	354.948	331.532	187.725	34.2738	188.312	21.0334	263.937	149.899	77.1608	52.6142	64.9731	285.847	47.8717	53.7646	245.603	136.74	28.3857	22.915	53.4838	37.5027	64.5381	87.6642
53.75736435_501.5084634__[3M-H]- 18.2481 [M-H]- 54.7646_3	77.9647	69.4126	82.0137	68.2683	35.1864	38.535	3.88698	7.24667	4.03671	7.99122	0.034555	4.35362	2.53644	5.21297	13.719	4.9034	4.32063	6.78149	3.97574	2.35735	4.13116	2.28785	2.53117	0.0232341	6.18602	17.9966	3.15732	8.41256	2.71104	16.6242	6.29779	11.4903	17.6668	3.41956	13.6203	6.38133
53.78452651_730.5531062___7578	0.044486	0.0417716	0.0352303	4.39702	13.1742	10.4655	3.87277	14.4819	8.09724	8.01757	7.5331	17.4328	7.68508	5.33973	11.7201	4.92402	6.61488	0.0207037	4.04838	7.07341	6.28141	6.97069	7.71196	12.8898	12.1906	17.8599	12.3609	13.8482	16.4155	39.8394	15.5263	22.7796	8.74754	33.6099	26.9459	41.394
53.80772126_1073.743782___3550	1749.5	92.934	272.52	44.147	157.791	74.5232	105.807	79.2088	109.22	71.8886	61.4745	44.1824	76.2305	356.991	135.947	178.8	61.8733	83.6121	118.708	99.3738	112.113	105.244	125.366	128.298	84.1327	48.4622	113.055	92.1275	71.3831	69.67	64.2685	72.3333	75.6819	45.0453	61.9461	83.6382
53.81446398_1117.103532__[M-H-CO]- 82.8147_71	14.6056	50.3162	65.1788	8.80626	39.4116	24.4833	30.9235	57.0775	23.8736	55.7722	37.9044	34.7682	57.2725	159.944	137.01	84.8129	106.746	75.5685	81.0397	72.5429	76.8617	143.063	127.951	43.6352	46.4434	88.7111	28.651	45.1327	66.5653	81.685	66.5492	43.243	55.443	48.0444	51.16	65.2016
53.8242298_955.6656194___8435	19.4001	45.686	34.4558	17.5861	17.494	48.9068	34.7554	46.3249	43.7331	35.7875	45.3673	30.3538	51.4408	85.6538	140.882	190.416	95.8648	29.704	85.6694	39.7297	132.073	81.2945	81.9608	43.6106	55.1971	171.86	31.9145	41.0947	126.87	90.1055	12.6159	34.3725	23.7403	75.0054	348.321	61.6897
53.91390302_502.2130356_[1][M+1]3-__3	34.0563	73.6646	34.7245	22.0987	17.5872	53.6007	11.6572	7.24448	8.07025	3.99481	7.57166	0.0396846	10.1307	13.0141	25.1181	7.25061	6.48099	9.04099	3.97096	16.2662	20.646	6.85254	7.58335	2.52732	21.6163	32.9496	18.9453	78.8266	31.674	25.5501	0.0290452	8.61831	14.7231	13.6806	3.40591	3.19054
53.96108892_674.9094451___10	218.682	226.278	351.856	0.0402612	0.0400679	7.01342	3.88573	3.61717	4.04031	0.0365366	7.57757	0.0396846	7.6709	10.6132	11.6188	7.36349	4.39257	9.1595	2.01884	7.07155	4.17529	2.31713	5.11956	10.2772	318.127	518.038	565.296	19.6042	10.9674	25.0827	3.18435	14.3809	8.87442	13.6928	20.4235	6.45244
53.99561526_1073.706067___41	144.778	152.388	172.993	26.4882	127.968	102.95	108.165	94.9678	115.978	95.8515	101.967	17.6729	123.077	382.857	162.591	163.905	199.499	47.521	128.933	118.125	95.0945	60.1929	131.556	80.6444	143.258	105.01	102.19	68.3119	71.2733	125.575	65.7546	55.047	68.8565	58.9929	75.7118	87.5777
53.9964283_987.8876775___3812	14.5824	60.2316	46.5873	13.1937	22.1528	46.076	39.1482	36.0887	298.558	44.3031	41.6404	57.1822	50.757	117.538	202.427	87.1116	105.438	125.105	242.883	42.0222	126.39	102.413	69.7431	343.577	127.064	142.101	81.1735	116.411	70.6622	61.9196	25.4941	73.7168	65.6136	82.7489	214.789	52.1418
54.09566893_501.9069764___602	29.1935	34.67	57.5405	13.2642	21.9593	45.4787	0.0353867	14.4706	20.1515	3.99033	3.78153	0.0396846	15.1974	13.0145	22.8346	7.25061	10.7883	13.5435	5.95592	16.4706	20.7648	4.56836	5.05556	7.58195	15.4404	23.9637	15.7679	71.7482	38.0917	36.1859	3.14516	11.4769	5.88174	10.2458	10.2028	9.56003
54.14693083_674.9511284___10	177.987	137.566	205.019	0.0402612	4.40484	3.50671	3.88573	10.8359	0.0365954	8.03105	0.034555	4.35534	0.0232039	15.9198	4.64754	12.2725	4.38735	16.0291	4.03768	2.35718	4.17529	6.9514	5.11956	7.70792	280.806	773.341	563.44	36.4078	19.168	36.4458	3.17823	14.3809	14.7907	6.84639	13.6156	9.66672
54.17689072_1074.139918__[M+Cl]- 19.2034_41	738.591	110.027	207.395	52.9764	83.6277	63.0403	81.2322	98.3617	79.8647	71.8886	99.0413	43.5913	143.37	300.371	81.8326	121.936	136.403	59.7517	190.063	109.525	66.478	67.1079	96.8807	55.9022	130.264	63.1779	141.628	82.7057	65.9793	98.1004	77.1222	72.3333	62.7728	68.3583	58.5046	100.885
54.18347393_988.4433049___3825	0.044486	50.7969	42.6395	4.44443	26.4968	35.3276	62.3447	39.6381	193.487	60.3229	38.2445	30.6904	38.4624	113.426	185.738	80.0198	166.518	41.0049	232.198	18.656	148.227	69.9487	60.3495	280.72	110.662	109.549	35.24	63.2349	35.8599	64.5252	35.0147	52.178	66.3018	68.7923	65.3309	81.2206
54.24077621_429.9412077___46	397.114	514.282	531.462	40.327	61.4928	70.1592	89.2632	47.3617	24.4281	39.993	18.9627	35.3099	20.2098	28.5217	15.9492	4.83343	8.61122	22.572	5.95117	13.9382	8.24045	4.57392	30.3465	17.6898	30.835	59.721	34.6496	19.5899	16.2285	41.3136	18.8942	40.1221	29.3783	30.7485	10.2202	9.55173
54.24407077_400.5030445___1	59.1569	41.795	82.0706	22.4268	40.1128	35.5498	51.1151	36.5618	56.3788	20.2552	34.526	26.5209	20.4668	21.0792	13.8476	29.0265	21.8336	27.4568	22.1034	16.2713	14.592	13.7379	52.4575	25.6207	71.1342	138.787	141.431	22.7331	49.4134	100.061	25.5564	103.294	26.8547	62.3875	27.6195	22.5729
54.28056207_501.7760448__[3M-H]- 18.4285_3	63.1739	55.1071	57.8823	17.6855	4.39185	34.9836	0.0353867	21.6809	16.1041	11.971	15.1261	8.6942	20.2631	7.80871	27.4016	22.0244	2.16032	18.0579	5.95592	16.4706	10.3118	9.25181	5.11954	5.05463	27.759	35.9455	37.843	52.6545	43.3767	22.136	25.1613	20.0845	11.7635	6.83056	10.2028	9.56003
54.32817253_674.9989296___10	208.051	85.9956	164.802	8.80789	4.40484	3.50671	7.77146	0.0328174	0.0365954	4.01552	0.034555	0.0396846	5.11393	7.95991	4.64754	12.2725	4.39257	9.1595	2.01884	14.1431	4.17529	9.26854	2.55978	7.70792	183.154	408.386	256.145	14.003	10.9531	13.9157	6.3687	8.62852	20.707	6.84639	6.80782	19.3334
54.3590009_1073.948928___3550	193.18	157.988	92.2649	44.2126	164.585	103.123	86.3834	103.78	63.9879	88.2111	110.144	66.2736	115.381	160.6	143.657	95.197	181.617	77.114	104.272	109.355	86.8065	101.831	97.7223	71.0851	107.395	137.979	102.19	94.3306	49.4852	91.0357	93.1893	81.1218	65.8628	93.6785	87.9013	81.3725
54.3563101_988.0540315___3841	4.85516	73.9998	46.0336	30.7853	79.6146	42.4595	46.8878	32.4798	126.113	39.7928	37.8549	30.7388	53.9297	262.475	141.042	126.082	66.3003	59.1369	118.237	18.6766	130.073	67.2853	71.6934	235.721	55.7215	148.857	54.4619	88.1873	58.1097	56.1959	70.1966	84.6521	68.3818	62.0617	178.134	55.3129
54.42419628_430.2727526___46	419.159	447.843	497.935	22.4039	70.3729	31.6064	19.428	32.842	40.7135	35.9937	26.5778	13.2412	15.1573	28.5217	13.6707	14.5003	4.30561	13.5432	0.0182778	9.30219	8.24045	11.4348	12.6444	10.1084	18.501	38.8186	15.7498	8.40437	2.70475	33.0509	9.45693	34.4271	23.5265	23.9155	13.6421	9.55173
54.45958534_502.3238342___603	9.74559	13.813	27.0117	4.42138	8.7966	3.50318	15.5479	3.62334	4.03671	0.0365366	3.78707	4.3471	12.6645	13.0145	11.4173	7.26055	10.8016	2.2605	13.8972	11.7867	8.26231	0.0210019	7.59351	7.58195	12.3523	17.9727	12.6293	22.4335	10.8442	22.136	3.14889	11.4903	2.94447	17.0978	6.81015	12.7627
54.54322313_1074.054777___3558	112.153	125.461	122.102	39.7323	77.2159	63.1352	58.1071	42.9435	67.885	75.8824	102.548	13.0774	167.171	115.365	166.784	69.1547	140.434	39.5684	113.077	36.3872	82.1937	51.635	88.2322	177.573	77.9007	148.845	105.219	80.6687	63.231	50.2273	35.3477	46.3553	47.9002	62.4631	61.9461	68.0569
54.61603362_415.3987421__[M+Cl]- 19.6417_6	102.237	250.66	315.507	30.9418	83.5089	90.1366	27.1788	43.2221	20.1127	31.9657	49.2868	30.481	43.518	28.9914	46.1709	24.5046	17.4674	9.14693	10.0514	28.2653	18.7911	23.1842	28.2278	25.6245	49.93	155.308	94.8342	59.5588	59.8476	78.1769	31.8871	52.2274	44.6659	92.7106	17.2563	35.5
54.70603035_774.4362105___8791	4.84856	4.56392	7.72716	4.40163	4.39425	10.4732	19.3667	10.8354	4.03375	4.00405	7.53571	13.0657	5.10429	2.64741	6.97585	7.35019	6.58518	9.1746	4.04148	2.35509	10.435	13.9345	17.9419	15.4235	27.46	32.9577	37.1729	24.8868	16.5067	27.9688	27.9091	25.5491	55.4008	40.0208	53.3195	56.4592
54.72587785_1075.455344___6596	102.522	77.9576	113.87	48.5598	109.688	54.4111	54.1526	82.307	55.889	158.228	72.0799	65.3824	143.036	194.436	135.443	97.4763	87.5783	52.0385	152.778	57.6252	62.4371	43.7961	30.6123	54.8653	74.8927	77.858	66.956	59.773	60.5684	78.2723	45.7807	151.045	56.7923	59.0667	31.0125	188.664
54.79707137_416.4466716__[M-2H+Na]- 33.8318 [M-H-CH2]- 69.8148_6	63.2917	181.458	164.073	48.6234	61.5246	70.153	54.3531	28.8051	52.2867	31.9267	41.7171	8.71737	25.2613	52.7097	43.8633	22.0459	15.0866	16.0064	12.0606	4.71085	20.8794	4.63635	15.3923	15.3746	112.063	149.598	86.6568	56.0652	32.5177	52.3703	37.8251	34.4116	23.5458	37.6268	13.6258	19.1129
54.88667601_774.4362105___8792	4.84856	22.8196	15.4543	8.80326	17.577	0.0319682	15.4934	14.4472	24.2025	4.00405	7.53571	13.0657	10.2086	10.5896	13.9517	17.1504	8.78024	2.29365	4.04148	4.71018	8.34803	27.8691	33.3206	25.7059	36.6134	23.9692	34.0751	27.6521	22.009	19.5781	34.1111	42.5819	14.5792	73.3714	30.2598	47.8291
54.90618042_1114.329748___5275	29.6397	46.398	42.825	4.47089	48.8526	28.3822	7.84193	28.995	20.2069	36.4155	26.9141	13.2259	50.7948	49.5046	102.742	77.5466	58.36	72.2116	67.9442	35.0845	81.4243	48.1786	87.4959	60.6795	18.8477	45.2395	32.2919	54.3972	38.2766	44.4241	38.645	43.882	24.1065	27.8521	34.6504	48.2488
54.96455365_490.9149671___4555	24.3028	18.3739	26.9776	178.185	240.44	211.815	267.589	299.205	234.626	126.527	108.829	133.937	10.1164	7.79272	4.56109	7.24372	6.47025	11.2712	7.93738	6.97562	10.2973	4.56663	7.57956	12.6254	12.3312	26.9036	22.0782	16.812	21.6559	24.8428	15.7255	14.3341	20.5839	6.83529	6.79277	9.56459
54.97102854_324.5736694___2290	44.557	73.9213	125.074	236.633	248.027	230.462	71.9489	127.592	94.9378	43.1324	32.2561	34.9604	12.6659	7.82427	11.4136	4.8547	10.8065	9.06664	5.95948	4.65622	6.19088	6.88664	7.62394	5.07099	9.27574	26.9746	12.6459	8.42481	16.27	27.6519	12.6638	14.4054	14.7562	10.2698	0.0313307	15.9774
55.02057523_309.7044791___117	131.802	153.066	121.044	39.9542	66.0762	63.2587	7.77646	28.9318	28.1654	32.1838	15.1729	39.4327	108.903	141.159	105.318	41.3556	67.1252	49.9182	29.8866	41.9682	37.1813	18.4151	38.1345	22.8179	152.117	144.554	174.538	39.3587	43.3435	38.6572	15.8442	14.4079	44.3074	20.5302	27.3094	12.7683
55.02048969_270.4971254___3495	137.019	242.719	154.433	31.0739	57.254	59.8631	31.1442	14.4651	4.00557	0.0365366	7.59822	17.4809	95.8925	163.075	92.5038	26.6576	36.68	24.8971	9.93648	16.2925	4.12456	13.7736	5.07235	12.6513	173.482	219.221	164.535	11.3878	10.9812	47.381	6.43629	11.6966	5.99864	27.7255	13.8643	9.7024
55.05701561_329.9142483___44	182.332	212.307	226.005	168.117	135.542	143.972	120.064	115.449	92.3761	56.0458	68.28	43.6135	7.5813	0.0238966	13.6541	2.42022	8.628	6.78436	1.98412	2.32507	4.1163	0.0210019	2.53718	2.52865	0.0283566	2.99052	9.47367	2.80501	5.42123	22.0745	15.8124	17.2629	2.94712	23.9492	27.2853	19.1299
55.09271729_1114.477502___5276	19.7598	37.1184	66.184	4.47995	31.088	35.4777	35.2887	32.6194	28.3471	24.277	19.2243	26.4517	42.4561	50.1771	61.7414	72.1607	86.3882	79.6567	58.171	30.4065	46.3533	44.3643	50.8118	55.6885	34.5541	58.4114	29.1196	25.7671	45.2087	38.8711	16.1386	26.3292	27.1719	17.4076	24.2553	41.8641
55.07499606_774.3014664___8793	9.69712	0.0417716	7.72716	4.40163	8.7885	3.49106	7.74669	25.2827	8.0675	8.0081	3.77256	8.71044	7.66681	15.8845	11.6264	4.90013	8.78024	9.1746	10.1165	11.7755	4.17893	25.5797	23.0975	10.2824	27.46	35.9539	15.5101	27.6848	27.5112	14.0041	27.9091	28.3879	29.1583	36.6857	47.0709	48.2493
55.08657501_1047.525219___5678	39.3041	163.55	169.178	30.7556	87.2788	83.6856	100.18	81.9086	63.5489	226.113	97.2791	69.3427	122.11	118.516	147.092	63.373	158.921	102.708	69.2302	39.6164	117.986	186.378	203.359	194.376	114.622	120.471	82.5906	94.4919	73.8747	83.1642	71.8559	128.806	91.9757	62.9621	38.0896	195.068
55.14627017_491.3255664___4556	29.1306	13.7646	34.6814	178.345	286.029	229.171	211.584	244.828	246.655	124.768	109.007	78.2416	10.1026	10.3906	6.83314	0.0221872	6.47043	4.50237	9.91094	4.64449	6.17134	6.84994	5.04738	2.52229	21.556	29.9022	37.8071	8.40598	13.5351	22.0845	9.42473	11.4553	14.6866	3.41764	13.6006	9.56535
55.15086104_324.6651366___2291	57.223	75.3681	109.775	189.744	197.49	223.252	87.9977	63.9301	105.068	28.5035	57.7675	17.7385	10.1206	10.4206	15.9604	0.0221872	2.15881	2.26402	3.97772	0.0213417	8.24487	6.87864	0.0232272	5.06506	9.26421	38.9137	12.6614	11.2471	18.9584	41.4231	9.50988	8.6543	5.9099	13.7101	23.9279	9.57382
55.25756614_774.4627795___8794	4.84317	13.6714	15.4368	8.79063	17.5511	6.97279	34.8203	28.8606	16.1129	15.9976	3.76372	0.0396846	5.09864	18.5078	25.8502	9.78686	10.9607	16.0344	10.0913	2.35208	0.0189364	23.1968	15.3614	10.2698	21.3371	26.9343	9.28596	22.0684	30.2253	16.7589	18.5837	22.6929	32.0359	39.9809	33.6093	35.338
55.27562214_1049.942415___3267	39.3642	92.2433	116.36	31.1467	84.0999	144.961	101.477	90.1673	120.671	256.179	141.42	52.7529	98.7708	103.885	317.032	111.506	188.68	111.558	147.634	41.9486	247.004	135.9	270.523	197.498	116.227	144.581	80.4328	105.802	93.0421	99.8048	88.3934	90.5136	129.965	83.9507	41.5559	160.12
55.33616882_324.7061684___2292	79.2124	78.273	105.818	129.546	165.416	113.029	44.5024	76.1251	103.299	12.2181	30.8116	13.1147	17.7275	20.8389	29.6386	4.84847	15.107	2.26658	1.98925	4.66199	2.06116	4.58539	2.53816	2.53242	15.4596	28.4435	34.8264	36.5531	13.542	35.912	12.6826	14.4232	23.6392	23.9992	6.83728	19.1499
55.32598131_490.4301417___4557	24.3324	22.991	23.1515	135.1	198.186	178.246	148.694	154.316	127.703	48.0357	37.8962	60.9409	5.06442	5.20129	6.84887	7.35767	6.4781	2.25711	5.96012	4.71779	6.18737	2.28961	7.58911	7.58445	24.6917	8.97836	40.9997	8.41649	8.13086	24.8716	9.43445	8.6019	2.94044	10.2661	10.2152	3.19217
55.33351603_421.0313248__[M-H]- 56.3369 [M-H-CH3]- 71.3651_6	125.917	84.6202	104.982	53.835	53.5019	74.7577	39.3971	21.9174	48.9689	34.4837	30.7939	17.691	30.3464	26.0017	31.9463	16.9207	10.7904	11.2934	17.8789	6.97482	16.5057	16.014	35.4703	7.59102	30.8355	44.8597	15.7385	33.6328	16.2764	19.3207	6.3053	17.2018	26.4821	27.3438	3.40754	15.9446
55.35445044_444.6776628___2818	29.2952	55.2534	46.3709	13.3437	57.2832	95.0881	39.395	46.8616	44.3152	44.2086	45.6298	52.483	12.6989	20.8354	9.13891	14.5274	15.1374	15.8537	7.96375	6.996	12.3826	16.049	20.3015	20.2865	12.5719	15.0088	12.8179	28.4537	16.2932	5.53603	9.6185	29.1933	35.8829	31.2517	44.4881	35.2025
55.46288278_1052.294179___3288	24.5296	206.184	157.127	17.798	101.501	137.517	151.958	85.4407	109.317	152.975	250.895	70.2236	156.289	162.33	303.464	89.4483	200.319	88.1251	200.378	44.4299	236.134	245.665	365.307	173.593	81.4479	135.116	85.9972	183.699	122.685	109.268	280.333	112.452	173.674	62.8823	62.3474	109.421
55.46064823_1115.722174___5210	24.3429	116.161	85.4944	17.8836	53.2918	67.4109	43.1305	43.4124	44.4553	56.6464	53.8311	44.0862	53.2697	95.7873	96.8427	76.7385	76.0944	72.9094	117.133	39.7107	75.0357	84.9885	69.0525	65.1309	55.7315	42.2236	35.5213	51.5172	49.4421	69.4127	41.8654	37.4856	48.2079	48.041	41.5035	61.1859
55.51350235_451.1720912___223	38.9384	32.1179	34.7405	26.5908	83.3373	52.6437	60.597	90.8283	101.678	39.9639	37.8984	34.8744	0.0232039	12.9737	4.54941	4.82353	2.15231	4.50997	1.98412	6.96967	4.11163	6.85008	12.6421	15.1377	12.3224	17.9359	28.338	8.38211	16.2017	11.0315	12.5935	22.9397	5.8736	6.82113	10.2114	31.8706
55.52307714_324.8608238___2293	39.6858	50.0065	81.8677	65.852	106.562	85.0689	19.7271	54.718	61.7562	8.1619	15.4366	8.75515	7.59952	10.4324	20.5444	7.28205	8.6452	9.07864	3.9785	2.33423	0.0189364	2.29555	2.54131	2.5355	9.27574	14.9859	3.16604	14.0781	18.9817	38.7127	15.8754	14.4434	5.9179	37.713	13.6923	6.39096
55.52185059_422.6744797___13	125.027	133.391	130.45	17.9173	26.7056	46.193	55.0609	54.0532	28.1449	16.2072	23.0562	17.6593	17.9176	13.1601	18.4789	17.1435	19.6564	20.5742	8.0426	18.817	18.7936	6.95487	20.5124	12.8053	24.9751	21.1907	19.1419	54.3276	45.126	60.1113	19.1352	25.7654	29.7592	31.1536	24.1333	25.8178
55.56894074_124.4631399___7304	0.044486	0.0417716	0.0352303	0.0402612	0.0400679	3.49245	0.0353867	0.0328174	0.0365954	0.0365366	0.034555	0.0396846	0.0232039	0.0238966	0.0209605	0.0221872	0.0198348	0.0207037	99.7028	235.251	105.313	0.0210019	0.0232272	0.0232341	3.10102	0.0274813	0.0290008	0.0257658	0.0249155	2.76875	0.0290452	0.0264366	0.0271353	0.0314148	0.0313307	0.0293344
55.62916773_739.7081287___4673	0.044486	0.0417716	11.6702	8.82665	17.6448	7.00394	35.1771	40.5462	36.5569	4.01902	0.034555	4.37163	5.1431	10.5616	16.1903	7.29833	4.43158	2.30877	6.09973	4.7277	10.5165	14.0012	10.3205	12.9513	21.3586	17.8397	12.3732	8.30059	8.16076	16.6552	12.4464	19.9781	40.8458	43.7049	16.9033	24.7882
55.64689687_1052.00926___3275	49.0592	207.82	227.247	35.4978	215.279	163.511	159.538	58.9506	165.993	225.238	274.275	61.3563	109.356	145.118	254.733	105.847	195.393	106.109	193.445	51.219	230.124	212.745	475.455	173.137	147.494	156.147	141.427	136.56	122.481	105.939	193.302	119.358	136.976	94.1831	51.8838	123.288
55.69612632_475.7292264___2	49.0319	69.2018	43.2901	48.8936	39.7759	21.1481	46.7911	47.1019	44.5081	12.0119	15.2266	21.8698	17.7177	18.196	13.6828	7.26772	4.324	11.3082	0.0182778	4.65943	4.13206	9.15805	5.07417	12.6711	151.371	93.2065	147.715	33.6942	37.9821	34.1795	18.9432	43.1295	17.685	20.5594	3.41026	22.3517
55.70664904_327.8320022___5933	111.595	73.4511	143.85	48.7198	74.7719	52.6822	27.1931	46.9477	36.181	8.01851	18.9658	13.0968	12.8189	10.5817	13.86	9.82744	17.5324	2.29509	0.0182778	2.35998	6.26695	2.32348	7.73033	7.7017	12.5249	24.2818	3.20515	5.69379	11.008	39.209	28.8953	11.6808	8.97546	13.8879	6.92231	6.47249
55.70204624_435.9368636___1203	34.4675	46.3615	53.9355	44.2192	124.426	122.753	66.7472	86.1733	84.2405	24.2847	57.5214	30.4592	28.1505	13.1217	16.1241	14.6461	8.72212	11.4176	8.03216	11.7498	10.4199	16.1955	15.3514	7.66694	34.3106	36.2796	12.7503	11.3144	5.47694	22.3161	25.48	34.7793	11.8841	24.1598	6.89065	6.44886
55.72680496_500.8045558___3	218.484	118.392	145.097	26.5374	35.1864	31.5338	11.6796	32.5683	12.0959	3.99561	18.9659	4.34803	2.56939	7.91958	6.95066	2.45666	6.57579	9.15998	4.02781	4.72455	4.18493	2.31776	5.12892	7.69124	27.7999	33.7343	18.9439	19.6293	11.0014	28.0723	3.14889	8.61776	11.7779	6.83912	3.40976	6.47319
55.82561216_1052.276925___3276	29.3225	266.287	187.399	22.1543	286.236	196.682	135.864	93.3864	148.239	235.969	252.246	69.8579	114.108	107.425	242.52	90.827	201.212	90.3845	106.08	42.2603	199.424	146.937	307.731	157.78	121.705	101.46	118.713	98.4044	82.7811	139.484	140.207	136.709	146.076	125.42	110.398	200.448
55.82651771_1116.316069___5215	29.1761	64.8382	61.3308	8.81479	26.2743	13.9903	38.6545	49.9558	19.8946	51.7904	26.5325	13.2013	27.9014	118.342	93.1472	67.978	72.9275	81.9622	75.1001	49.9696	82.3818	81.1917	72.2591	63.2769	52.5685	81.43	28.6502	59.9925	49.2195	77.9541	28.5243	51.8241	38.6087	61.6933	47.7535	61.1735
55.88429327_475.720839___2	139.969	32.2475	47.2256	26.6243	48.615	28.1975	23.3955	40.3908	24.6032	12.0119	11.42	8.73578	12.6555	20.7954	13.6828	9.69029	4.31841	6.78489	5.97098	4.6533	6.19809	11.4476	9.319	12.6711	92.7418	84.2333	122.137	17.6629	8.12571	25.4137	18.9432	17.2518	17.685	13.7062	37.4659	6.3762
55.88786466_326.7743194___5949	97.16	70.8749	123.905	26.5277	35.1865	49.1697	11.6541	32.4673	12.0462	0.0365366	3.79303	8.72164	7.68037	21.129	18.4552	9.81351	4.3747	4.582	14.076	2.35607	8.34428	2.31983	5.14489	0.0232341	3.12503	9.08719	3.19962	14.2103	13.7333	11.1827	0.0290452	2.9152	8.96039	10.3973	6.91025	6.46093
55.88574303_436.2158453___1204	33.9937	36.5897	70.7005	48.5975	87.6731	63.0268	54.2248	53.8014	24.0428	40.3661	18.9123	39.125	7.66631	13.0862	16.0801	19.5268	4.34814	20.4949	8.01032	9.39998	8.31112	6.93076	15.3301	17.8408	15.5538	27.1737	22.2814	16.9692	13.654	13.928	15.925	20.2897	11.8838	17.2596	20.6684	16.0999
55.91647748_501.4879641___3	84.4801	57.3919	182.934	22.1069	8.79359	21.0461	7.77147	7.23532	4.0303	0.0365366	7.57166	0.0396846	12.6645	2.6029	11.4173	2.41687	6.48095	4.51449	1.98531	0.0213417	4.12471	6.85254	0.0232272	5.05463	6.17614	23.9637	12.6302	5.60807	8.13313	13.835	12.5957	14.3639	11.7785	3.42016	3.40591	0.0293344
56.01632669_1116.71794___5277	24.2862	45.6833	34.4599	0.0402612	34.9891	31.4404	23.1378	28.507	31.7947	51.7305	18.929	4.34059	43.6422	124.179	82.1364	55.7746	92.133	34.2858	79.7067	25.6953	102.748	88.2288	69.0624	56.3725	30.888	60.9707	38.1144	64.8022	46.9896	72.9543	41.1563	46.0123	53.3059	44.5055	57.9198	70.7752
56.08380427_402.8179545___251	29.0731	54.7533	69.1299	44.05	70.0048	83.819	42.5044	68.9624	24.2917	47.7481	52.7954	34.7312	22.8656	39.228	36.641	19.4707	10.8298	31.7669	14.9922	51.5981	54.6547	102.869	141.252	116.869	99.2418	100.229	60.1939	59.2613	19.0679	89.0755	66.6275	80.9422	55.0402	90.2083	41.9623	41.6476
56.07658659_328.889737___3704	87.4378	41.3672	84.208	22.172	44.0366	38.6831	7.77892	7.2314	24.1517	12.0452	15.1919	4.37098	5.06492	23.4995	16.1983	9.84532	4.32731	4.53412	8.07193	4.72866	2.09318	13.9654	12.7202	2.57179	3.09247	14.9887	9.49629	14.0584	8.15158	11.0645	3.17086	23.0719	11.8191	30.8638	10.2575	15.9783
56.07526875_430.1458469___46	75.9987	110.472	149.601	66.6494	103.441	105.672	58.4738	50.5427	48.4108	40.179	57.1074	30.6237	17.7768	15.6397	20.5845	12.1343	19.4755	13.5998	5.97211	21.0229	22.7553	11.4813	27.9425	25.3499	43.306	48.0172	44.2778	36.5681	21.7535	38.7699	18.999	51.8533	8.86168	51.4742	13.6974	19.2076
56.19927147_1053.650488___3310	34.2492	192.387	150.597	44.3086	239.205	154.673	116.591	129.304	125.154	227.194	178.906	104.908	130.146	167.901	135.723	111.985	167.184	90.791	97.8795	51.7121	152.125	129.261	135.243	95.8647	163.345	173.231	107.395	109.804	110.23	151.224	109.796	109.136	117.875	128.905	134.545	126.947
56.26480514_327.5542565___5950	43.8686	27.512	30.8536	17.7163	17.5934	28.0972	11.6542	21.6443	16.0621	8.01851	3.79315	4.36561	7.67878	10.5608	11.55	7.37058	10.936	6.88414	4.02792	2.35998	0.0189364	4.64696	5.1445	7.7017	6.26243	9.10488	15.1553	2.8469	13.7341	36.3454	19.2636	0.0264366	14.9339	0.0314148	0.0313307	9.70811
56.27293562_411.1169557___8563	24.7558	18.6816	31.468	22.5258	35.7487	49.9311	43.423	36.1649	32.307	12.186	15.4164	31.0943	25.3164	13.0377	6.85149	19.3882	12.9576	13.5744	65.8019	64.9857	67.6762	64.4675	127.249	74.3932	106.058	53.8885	37.8172	43.0976	40.7414	30.3776	44.2247	64.8483	37.5754	68.8943	34.148	28.7291
56.3949233_1117.769236___9430	29.1434	36.5037	30.6366	13.1945	13.1059	34.9328	26.9929	28.5065	23.8452	15.9171	30.2464	56.3607	33.3725	160.741	179.743	80.8056	153.58	133.29	161.047	40.2576	123.962	102.287	80.9981	97.6908	77.2302	45.7261	19.0534	19.7	38.6948	72.9644	18.9931	11.5045	35.5437	34.2324	47.693	87.8944
56.39415807_1070.20158___41	4.8763	118.958	88.3051	26.4448	74.5187	102.247	84.9839	78.6314	59.8087	95.7327	99.8095	44.1004	293.785	285.858	128.546	121.982	139.237	44.3307	139.81	28.0991	72.8188	87.964	53.3911	68.5625	88.1875	206.266	73.2577	65.3635	116.75	201.537	35.3605	26.0721	62.6659	72.8882	55.0534	48.6246
56.46355732_423.9768731__[M+Cl]- 21.4927_13	1406.17	1184.96	1615.85	326.72	235.99	313.405	42.7972	46.8278	8.05043	32.0666	22.8101	17.448	23.3989	18.4854	34.7679	7.35956	21.9169	6.88326	18.159	14.1588	45.3043	69.6757	20.581	25.6997	47.0032	69.6475	31.9562	31.2887	30.3059	33.6338	19.1973	26.189	38.8108	24.2698	34.5843	16.1661
56.44566207_399.5085854__[3M-2H]2- 38.2982 [M-H]- 57.454_1	39.4379	13.9317	15.6282	4.48554	22.2849	35.5498	43.2512	32.9056	36.6806	24.3076	19.1811	22.1022	22.7278	20.8085	20.4986	12.0944	17.2395	9.03326	13.9044	32.5426	14.4239	34.3449	32.67	35.4006	53.0333	44.7795	67.0064	36.9412	32.511	41.3069	31.9455	29.0896	23.8709	24.2618	41.4293	35.0105
56.54596157_740.1416686___4674	0.044486	9.13097	0.0352303	4.40089	17.5933	10.4766	23.272	18.1179	8.11136	16.0306	11.2964	0.0396846	5.20294	2.71694	7.0343	10.0124	2.24522	9.35787	12.365	7.18748	12.7901	4.73076	7.84551	5.25043	12.1692	14.8262	6.17999	19.3451	19.0114	22.1692	27.9309	39.8012	14.5489	94.946	79.1352	28.6288
56.57811642_1070.599748__[3M-H]- 19.2034_41	29.2514	97.6487	46.1326	84.6789	87.6684	80.5748	85.0959	83.2038	75.7758	139.209	75.734	60.9556	226.851	181.517	143.008	125.976	163.523	47.5159	104.985	37.4663	106.501	130.235	53.4644	25.3948	118.831	163.026	50.9608	82.4179	129.291	241.953	61.5141	58.042	53.7186	104.635	41.295	75.6719
56.58251936_1117.676061___199	14.5717	41.0667	15.3183	8.80626	17.4746	24.4259	42.4192	115.979	11.9368	15.9171	22.6897	21.6772	28.2855	128.6	151.679	60.6932	137.595	170.108	148.663	54.3739	103.807	119.661	64.2984	140.693	46.3381	39.6958	31.7971	22.5143	44.2967	53.4107	22.1831	25.8851	17.7686	20.5394	20.4398	39.121
56.64397772_423.3821927___13	1065.78	1053.93	1377.76	273.626	239.406	373.43	27.5765	25.2248	16.1025	32.4683	26.9448	22.1124	10.2552	31.6345	18.2808	14.5194	17.5016	2.26186	19.8663	32.587	20.1416	18.3258	38.0015	33.0967	28.1436	109.427	38.3463	19.9119	22.0007	50.3574	9.60034	37.8273	23.1791	27.7446	20.7494	29.0963
56.65936546_501.8930585___3	53.5213	102.594	108.355	35.3711	35.2303	71.6986	11.6757	7.24667	20.1835	0.0365366	11.3755	4.3471	27.8618	20.8232	15.9842	2.42018	2.16032	13.563	15.8825	23.2696	22.7214	9.15138	5.06234	7.58195	21.6165	29.9546	18.9699	25.2717	24.3994	11.068	15.765	2.87647	14.7231	17.1243	10.2315	3.19066
56.73137692_558.0098663___20	9.7393	9.19117	30.9139	0.0402612	4.37163	0.0319682	0.0353867	0.0328174	3.98984	0.0365366	0.034555	4.33517	145.198	236.969	243.836	21.8097	27.2203	11.2755	7.96365	6.98391	14.8906	2.28886	5.06507	2.53458	6.18446	5.99621	0.0290008	2.81055	2.7104	2.76545	3.16234	2.87967	2.96013	6.8511	10.2154	6.38286
56.7608702_1118.100381___199	9.71446	54.7555	42.1254	13.1945	43.6865	31.4047	57.7819	101.527	15.8968	147.453	30.2154	111.953	30.8054	281.052	338.361	76.1669	333.762	351.716	271.654	68.4288	176.955	147.869	111.7	171.926	108.122	65.7085	47.5854	70.3573	49.7505	106.64	63.3103	40.2133	26.6315	23.9627	37.473	61.8516
56.75274565_1070.896151___41	19.4749	110.104	99.8224	48.4842	153.175	87.4637	73.3954	70.2935	31.9056	83.7648	92.8564	43.5397	187.064	193.544	122.352	108.911	135.792	76.4237	174.474	44.4913	85.1876	80.3807	55.9357	155.7	111.421	130.632	70.0711	65.275	71.4644	142.54	48.2263	80.9972	80.5779	103.973	51.6188	74.5641
56.83277775_423.8068885___13	552.337	608.981	632.963	169.147	141.313	250.176	27.5765	32.3857	52.2692	28.4098	23.0956	4.36201	33.3296	21.0897	48.5875	17.1723	17.5016	13.7386	22.154	11.799	23.0097	34.8316	35.954	23.0883	40.6538	57.6172	44.7387	22.7554	25.0238	43.9067	28.7959	11.6395	29.8544	39.8294	34.5843	48.4147
56.84379268_501.5781699__[M+Cl]- 21.8729_3	82.612	73.5704	134.91	84.7232	70.3728	45.1371	3.88698	25.3309	0.0365954	3.99561	7.57414	8.68406	25.6457	21.0799	13.876	2.4517	6.56214	16.03	10.0516	14.1441	18.8322	4.63552	12.8223	2.55916	15.4217	24.2629	9.47196	33.6502	21.8921	22.4168	12.5956	2.87259	2.94087	6.83912	3.40508	12.7627
56.91638214_557.9735706___2083	0.044486	24.5356	7.72847	0.0402612	8.74326	6.97575	0.0353867	3.58847	0.0365954	3.98123	0.034555	0.0396846	228.254	186.513	259.718	24.233	29.8074	9.02043	5.97373	9.31188	4.13541	4.57773	5.06507	5.0622	9.26431	12.0084	3.16556	5.62111	8.1312	13.8459	0.0290452	8.63901	5.91204	0.0314148	0.0313307	3.19143
56.95450581_1117.717817___9431	29.1135	36.5037	15.2992	8.78531	17.4746	6.97882	23.1378	35.5967	23.8198	142.241	26.4713	21.6772	20.5059	289.874	301.154	75.6821	335.572	335.519	226.306	49.6458	146.132	107.656	115.487	158.306	46.2841	39.631	28.5858	33.7715	49.6769	72.8407	12.6506	20.1088	41.4602	17.1002	20.42	39.0488
57.03644507_302.2767204__[M-H-CO2]- 102.034_38	317.744	335.162	320.153	128.989	165.203	161.94	124.603	79.7876	116.752	124.941	83.5731	87.7155	279.538	272.42	291.23	153.408	258.176	172.095	104.041	79.3715	80.7653	48.3538	87.456	71.1102	276.183	311.243	279.668	84.6948	68.0198	130.132	44.5689	72.3697	56.3983	58.4544	54.8804	72.8753
57.01755627_424.1643425___13	245.511	339.836	357.039	104.882	85.4826	136.557	42.744	43.2257	32.2426	12.025	7.59395	8.73462	35.9567	10.5631	32.4501	19.9889	15.3418	0.0207037	8.07065	16.5493	14.6696	20.9365	33.4441	15.4198	37.6026	42.5329	12.8057	25.6468	13.7754	25.1797	22.438	14.5757	5.98161	83.4439	27.7196	22.6326
57.03648502_269.835212___3475	248.003	340.304	265.416	106.539	130.053	103.29	66.9296	50.5585	44.0016	36.7237	23.1036	26.2214	579.707	283.048	595.284	53.3152	73.1613	67.812	29.7698	32.5406	49.4277	22.9251	25.3617	2.53025	289.726	412.179	393.554	59.7862	41.1234	86.2774	19.3089	40.9381	20.9952	31.1912	13.8643	22.6084
57.03569759_492.7008907__[M-H-C3H2O3]- 144.052_48	252.708	286.981	288.901	93.7825	93.2458	116.732	39.2789	25.5462	32.5576	24.1712	11.4548	17.5571	27.8203	36.3878	50.1596	24.1358	15.1027	29.2969	27.7815	11.6055	24.7025	22.8193	15.1591	17.6891	600.123	836.899	578.842	69.3465	70.4105	110.469	38.07	37.5951	53.3991	51.6942	30.6237	54.193
57.03578136_326.4028739___5951	167.729	201.503	187.277	88.4258	111.286	142.182	85.4875	64.8666	76.2122	64.9285	49.8916	30.5258	89.6058	123.906	121.902	93.2284	111.373	109.395	32.1737	61.2579	43.8075	32.4777	51.3642	51.2615	127.602	179.794	147.183	53.9993	57.5691	69.8698	41.5913	61.1247	47.7146	24.2604	34.4961	38.7629
57.10600242_558.4752126___2084	9.7393	9.19117	11.5927	8.77258	4.37163	0.0319682	0.0353867	0.0328174	0.0365954	3.98123	3.7655	0.0396846	83.8621	90.8329	56.7736	15.0422	10.8141	13.5306	1.98847	4.65594	0.0189364	11.4443	5.06507	2.5311	3.0881	8.99431	6.33112	8.43166	10.8416	8.29634	0.0290452	2.87967	5.91204	3.42555	3.40515	15.9572
57.12875239_1110.582867___1612	63.3081	73.2008	126.603	87.9908	66.9581	104.626	53.7879	57.1455	43.8394	119.806	74.0012	47.7957	184.401	296.178	272.074	74.1241	68.7419	200.275	98.3195	46.7805	130.184	98.874	94.1962	103.818	142.174	177.238	109.803	104.146	89.6767	110.941	44.4937	57.7125	56.4638	80.7041	34.1811	44.7875
57.18488365_455.7554097___2413	24.6079	37.0841	54.6407	131.997	131.523	127.013	43.1472	47.1972	64.9013	40.3788	45.9769	61.6623	70.7689	31.4311	49.8353	19.5106	19.5643	22.8036	6.02081	25.8353	24.9583	13.8519	12.7794	17.8563	24.9155	39.1963	25.4787	19.7744	8.1816	2.78194	12.7353	34.7892	17.8149	20.6855	10.3205	28.9474
57.19595619_424.1643425___13	123.989	154.317	245.893	61.9759	52.782	59.694	38.8582	32.4192	36.2261	28.0185	37.9698	17.4468	43.5853	31.6183	25.4491	19.625	13.1229	16.0319	8.05618	16.5191	27.1936	18.5761	28.2358	23.087	43.792	45.4885	35.1516	22.7544	19.25	33.573	25.598	23.28	11.9413	41.6135	41.5052	29.0991
57.24486765_502.1045714___3	117.55	123.826	119.376	66.976	95.9778	155.275	15.5429	7.23532	8.0606	3.99481	3.78583	4.3471	10.1316	15.6174	20.5512	2.41687	6.48095	4.51449	5.95592	0.0213417	4.12471	6.85254	0.0232272	2.52732	9.26421	14.9773	12.6302	19.6282	8.13313	16.602	9.44676	2.87277	11.7785	10.2605	3.40093	3.19066
57.31473988_1111.235492___14	77.8192	73.0085	65.0958	58.127	78.7741	133.399	92.6529	74.8578	137.011	91.4834	57.0781	43.3571	190.105	254.954	151.428	84.4631	253.173	139.447	127.52	49.0555	78.4499	78.8757	97.8615	88.5859	147.875	144.054	73.0966	84.2532	105.981	146.343	47.5636	51.8736	50.4629	110.153	75.0106	80.4412
57.37425597_452.5677489___2657	19.7323	32.5408	35.2238	117.289	104.813	90.8726	43.274	54.6008	36.6044	36.4755	57.6178	26.4638	17.7107	28.5676	54.6559	19.2935	12.9276	20.3168	9.93482	18.5828	18.5283	13.7155	12.6513	25.2496	6.24909	35.8674	6.38945	11.3169	10.8144	30.338	15.9429	26.1731	20.8167	10.374	0.0313307	9.55773
57.4281017_501.8750612__[M+Cl]- 22.4575_3	89.3342	91.2841	133.787	87.9447	82.3494	171.711	7.78378	7.23532	12.0909	11.9844	3.78583	4.3471	7.59868	7.80871	11.4173	9.66748	6.48095	6.77173	11.9118	6.98087	8.24942	4.56836	12.6389	5.05463	15.4404	26.9591	15.7877	11.2023	21.6884	11.068	22.0424	8.61831	20.6123	23.9411	13.6037	12.7627
57.49736894_1111.923989__[M+Cl]- 22.5255_14	58.3499	82.2484	57.5006	39.6181	74.5953	96.5178	57.8427	53.5415	43.7834	47.7944	56.7204	43.4068	111.028	176.823	110.476	77.1931	139.375	45.0775	89.3912	62.9826	60.1705	43.5813	60.3374	55.567	74.2233	122.832	78.3087	78.0641	68.269	114.987	47.599	28.8087	47.4813	71.3872	47.7868	111.699
57.56666427_400.1555967__[M-H+Cl]2- 81.174_1	44.3032	67.7978	66.2452	44.7163	57.8326	70.8891	43.1227	46.8642	59.7809	44.4206	34.4343	30.8461	58.6518	53.6535	52.9203	41.5961	30.6448	15.9642	22.0694	18.7843	22.8969	34.7586	44.0936	38.3162	127.706	208.356	220.572	81.6501	60.5362	120.863	41.4025	46.3987	41.6479	44.9874	37.8521	54.6547
57.57289085_419.2417421___6	140.838	59.719	173.734	153.837	66.0667	63.3665	42.8113	57.7362	48.3708	56.1694	26.6087	13.1058	434.967	339.574	341.448	58.1574	83.1329	29.4014	9.94289	18.6429	18.5919	9.17353	22.8391	12.6678	37.0598	91.112	47.3194	42.1475	16.3197	44.2841	9.48156	20.1188	11.7992	24.0005	17.0716	15.966
57.62338544_502.1988147___3	43.7902	55.1748	73.2465	44.2139	70.3243	82.9064	7.77147	0.0328174	16.1212	7.98962	3.78583	0.0396846	5.06579	7.80871	4.56693	7.25061	4.32063	4.51449	7.94123	9.29495	6.18707	4.56836	5.05556	2.52732	3.08807	17.9727	12.6302	16.8242	8.13313	8.30101	6.29784	2.87277	11.7785	10.2605	6.81183	15.9334
57.67594538_1113.365603___71	44.4597	109.66	50.5206	30.8516	21.8905	45.4654	57.9821	21.7114	36.3156	56.543	22.7412	26.0439	43.1739	132.235	82.511	104.81	54.3287	60.8679	89.2467	78.043	61.4807	48.1699	76.1138	93.6968	94.0453	60.2539	56.7298	67.6709	40.6324	51.0907	41.2963	32.1778	26.7397	55.886	72.6563	118.184
57.75599549_419.5036729__[M+Cl]- 22.7828_6	87.8416	132.334	128.883	48.7294	92.8893	98.4418	27.2436	43.3022	28.2163	28.0482	34.2111	21.843	365.99	279.559	226.305	38.7699	88.1463	67.4776	11.9315	11.6518	10.3288	16.0537	12.6884	15.2014	108.676	162.812	39.7218	25.2885	16.2976	33.1601	18.9631	8.62235	14.7489	17.1432	17.0716	9.57962
57.87280419_984.8027099___9106	24.4808	115.135	96.6463	4.43244	61.6837	127.958	89.5197	39.5348	16.0465	72.1729	76.7627	26.235	397.49	209.591	432.998	63.6791	231.021	74.8586	254.406	18.8395	112.666	229.16	113.861	229.458	135.164	169.744	58.1916	54.4861	46.2118	107.861	28.9024	46.1848	87.6673	159.702	23.9889	67.2192
57.87218498_1067.430422___6167	72.7152	228.993	202.099	39.4873	147.205	90.6245	104.793	53.3746	239.032	162.492	184.903	77.9202	213.275	154.275	220.182	61.1981	94.3278	43.2619	233.458	25.9642	110.445	118.749	99.8723	193.519	90.6951	142.439	60.2596	170.744	91.4609	125.325	188.839	71.9462	143.551	75.9736	68.4186	94.7258
57.8716572_1114.298692___5211	44.5486	41.2216	54.6156	53.7594	96.4485	17.536	35.3596	21.7958	28.3471	86.1119	49.4129	8.70446	35.6038	109.652	98.7158	122.025	89.3701	101.873	82.8486	72.272	65.9698	41.357	38.1599	30.4135	44.0663	69.4605	35.5906	50.8733	50.6964	36.1423	38.7326	32.2479	48.3056	34.8841	20.8333	54.8196
57.93581596_362.1380983___2540	4.87988	4.59647	3.86412	4.43759	22.0263	14.0556	7.77825	14.454	12.0683	20.0659	7.59154	0.0396846	25.3488	13.0328	9.12903	2.42252	4.31932	11.3155	3.97757	4.65879	10.3185	11.4636	12.6957	7.603	6.18566	12.005	22.1631	11.2537	5.42884	30.4588	15.8265	14.4073	17.7379	30.8457	13.6859	12.7981
57.94540941_419.5060636___850	126.238	41.3439	93.4611	26.5797	57.2578	101.161	35.0275	43.3022	36.2781	40.0689	38.0124	26.2116	150.261	164.452	165.125	26.6543	30.2507	42.8757	7.95431	16.3125	26.855	20.6404	20.3014	12.6678	33.9715	53.9179	41.0102	25.2885	32.5952	33.1601	18.9631	20.1188	8.84936	13.7145	17.0716	19.1592
57.9643548_502.3238342___604	14.6407	23.0555	27.265	17.7063	13.2299	17.5631	3.89726	3.62843	8.08419	8.01238	0.034555	17.4113	12.6815	13.0318	16.0052	4.84758	12.9795	11.3191	7.95188	11.6348	8.27239	4.58217	2.53467	5.06121	15.4608	23.9961	12.665	11.2486	32.5759	16.6251	0.0290452	25.9337	5.90585	17.1488	0.0313307	6.38979
58.05580993_984.4435227___9107	14.7076	63.767	54.1219	247.376	82.8107	62.7315	61.6179	61.0992	39.6822	60.1441	84.0383	47.5792	399.583	275.073	466.073	63.7684	71.4124	128.765	247.048	18.8395	98.5392	259.321	106.939	310.329	135.41	134.958	74.4821	60.3033	65.2402	85.8123	41.8103	40.8436	96.3284	143.188	195.009	67.2192
58.13494574_419.2417421___6	39.0407	50.5315	46.4455	31.0096	52.8533	35.1578	23.3516	32.4766	24.1854	12.0207	26.6087	0.0396846	109.78	60.2848	75.3402	24.2312	15.1033	9.04657	9.94289	16.3125	4.13153	9.17353	15.226	7.60069	18.5299	26.959	18.9278	13.5869	13.5647	27.6334	9.48156	5.74823	23.5983	10.2859	17.0716	15.966
58.12009608_361.13005___2541	0.044486	4.60264	0.0352303	4.44413	4.41118	14.0741	7.78852	0.0328174	8.05632	8.03684	0.034555	4.38112	7.61696	13.0503	9.14096	4.85194	6.48759	11.3305	3.98313	0.0213417	10.3328	2.29579	5.08511	12.689	12.3912	6.01116	19.0229	19.721	2.71788	27.7274	3.17032	17.3118	20.7229	24.0226	10.2784	22.427
58.1499426_502.2755453___605	24.2952	18.3916	23.1218	35.3206	21.984	31.4852	11.6572	18.0883	0.0365954	23.9689	11.3446	4.34099	22.7662	15.598	13.6844	9.66748	8.63061	6.77173	7.93217	18.5899	18.5612	6.85254	15.1667	15.1459	33.9275	29.9171	25.2286	53.394	16.2455	30.3993	6.29032	11.4911	20.6123	17.0764	10.2028	9.56003
58.24517653_1048.76581___8891	39.1407	142.387	188.998	44.3086	206.876	120.639	66.0674	82.5192	167.878	168.713	270.896	56.8259	162.948	105.742	168.033	107.396	184.811	91.4735	143.522	65.8192	114.163	187.611	352.333	213.62	150.314	300.415	97.7818	155.091	71.7437	109.37	286.986	263.708	95.8137	125.081	51.7489	126.784
58.25328963_985.1491699___9108	14.7291	64.5609	65.8095	62.5878	78.4848	67.1233	39.0225	39.5878	28.1558	112.412	122.236	48.1643	278.701	306.022	253.3	124.828	116.425	60.6712	183.745	20.967	199.753	207.466	78.505	161.848	115.682	169.879	35.6613	190.671	86.2504	94.1127	25.7317	26.0464	71.9236	92.5302	58.343	64.081
58.24447682_1114.999684___5249	39.0107	51.0378	46.7181	26.8254	22.2503	31.9945	43.2172	28.995	40.4139	40.4617	42.3797	26.4517	38.0961	97.6633	167.559	122.839	87.7806	40.6267	60.6903	51.0537	57.3996	53.9996	35.5682	44.6287	40.8367	65.1776	29.1196	17.1781	19.1383	66.1018	19.3225	25.9878	39.2483	27.4881	27.7203	45.413
58.30134893_450.1013869___2819	43.6979	41.2084	53.883	48.6543	92.0611	59.5653	61.9861	67.9342	96.9559	23.9631	37.8185	47.841	7.66769	18.3584	16.1002	7.32925	4.35186	4.55984	4.013	16.4487	6.23852	11.5658	10.2268	12.7605	12.464	15.1023	25.5116	19.7842	16.3945	25.0685	6.36968	11.6173	17.8466	10.3632	13.773	9.65908
58.33073111_479.7453506___4816	4.93066	18.5704	19.5574	0.0402612	4.45325	7.10073	27.5089	18.2381	0.0365954	12.1097	26.8413	22.0041	17.8832	15.7378	25.3293	7.32356	13.0729	9.11584	8.02383	7.04404	6.2477	6.92348	2.55649	7.66212	15.5674	39.2631	28.6663	11.3223	13.6675	22.3065	3.18195	8.68882	11.8836	10.3599	6.87308	16.0873
58.32260605_382.711702___1429	0.044486	36.713	30.828	13.28	13.2077	17.5593	23.3088	46.9518	4.02065	205.045	140.784	92.0145	5.05423	23.7419	16.1855	7.36432	15.3013	2.29102	6.04027	14.1532	10.4474	6.96385	20.5707	17.9501	15.4294	24.2051	9.47349	2.80904	21.9663	24.8421	25.2831	14.3765	29.4965	34.2286	6.82889	12.7626
58.34305379_501.5778563___3	663.344	397.462	485.769	83.2837	26.3898	66.3223	7.77396	3.61766	0.0365954	0.0365366	11.3612	8.6942	5.06579	2.6029	9.13385	4.84036	8.64126	16.6447	7.94123	11.7867	16.4988	4.56836	5.05556	5.05463	9.26421	25.3974	18.9215	8.41256	10.8442	13.835	6.29032	8.60765	2.94462	13.6611	6.81015	15.9533
58.43287472_1047.933898___5647	44.0969	111.596	85.3012	22.1862	110.883	98.4754	73.9335	73.5833	92.2609	123.972	151.212	52.521	368.873	119.397	218.982	58.5671	105.623	131.845	234.085	41.8681	70.3712	240.173	261.091	141.441	168.189	245.773	72.0318	91.2397	93.7403	122.079	100.36	103.259	73.2737	83.7223	65.6092	101.39
58.51559431_475.8031478___451	19.8275	32.7289	23.5563	4.49654	22.4254	28.5589	3.9576	3.61832	8.08138	12.1696	7.7255	13.2704	22.7773	18.1902	22.804	9.67677	2.15856	6.7657	7.94068	4.65302	6.18155	6.85131	7.58968	2.53046	18.7757	41.508	28.4005	14.0203	13.5439	16.5718	3.15288	0.0264366	5.88713	10.2661	17.0285	12.7525
58.50326363_381.8405382___12	24.3984	18.3789	27.0107	8.86306	26.4475	31.6513	19.4519	18.0792	24.1568	142.898	134.888	108.8	7.59034	7.92795	13.9023	9.83724	6.56877	2.29564	4.0339	7.08972	8.3731	2.32538	12.8798	7.70844	6.17967	6.06147	3.16179	5.62546	5.501	22.1095	22.1514	25.9154	20.6731	17.1349	6.83753	15.9777
58.5284398_501.5098451___3	538.015	418.042	559.827	57.478	35.1864	52.5477	7.77396	3.61766	4.0303	3.99033	7.57414	0.0396846	20.2631	10.4116	11.4173	7.26055	6.48095	11.2862	1.98531	16.5014	6.18707	2.28418	7.58335	5.05463	6.17614	11.9818	6.30716	19.6293	10.8442	5.53401	3.14516	14.3461	5.88923	3.41528	3.40508	6.38133
58.62320487_1043.699672___5674	33.8963	138.067	103.234	17.5421	117.604	100.93	130.727	88.8726	95.1324	99.2213	217.555	73.5248	131.896	110.708	110.588	71.9492	76.5765	58.4883	92.7376	56.4822	75.2817	164.161	261.469	127.333	107.675	209.929	57.0725	121.127	81.9813	78.3627	79.8911	152.324	91.7965	117.351	90.6218	125.852
58.72127813_501.4647015___3	416.462	201.717	243.117	17.6916	30.7881	45.5414	15.5479	7.23741	12.0959	7.99122	0.034555	4.35362	20.2915	18.2203	13.719	12.2585	0.0198348	6.78149	9.93934	7.07204	8.26231	6.95328	5.12892	15.1837	0.0283566	14.9773	25.2586	14.0209	10.8442	13.835	9.44668	5.74517	2.94447	6.83912	3.40508	6.38133
58.82206164_1051.136027___3318	4.86869	85.6748	46.1049	4.40862	83.3361	38.5479	50.3584	57.1807	35.9128	75.8059	102.404	21.7765	30.5376	105.412	69.4473	69.6989	60.4952	33.4867	77.0973	35.1284	58.2744	87.5877	170.648	35.5121	74.5924	113.729	44.6878	56.7594	35.7596	80.8134	45.0444	53.4161	65.1204	55.6065	37.764	39.8898
58.9050052_501.644486__[M+Cl]- 23.9392_3	130.924	57.5405	127.824	17.6916	13.1949	17.5159	3.88698	14.4748	12.0959	7.99122	11.3612	8.69605	5.07288	13.0145	13.719	9.80679	2.16032	0.0207037	5.96361	4.7147	2.09246	9.27104	0.0232272	5.06122	0.0283566	23.9637	22.1012	22.4335	16.2663	22.1656	3.14889	14.3629	8.83341	6.83912	23.8355	3.19066
58.97264063_737.1174556___4076	4.89201	0.0417716	7.82987	8.89769	22.2285	24.6721	61.2305	29.2656	24.5643	4.04421	7.59925	0.0396846	7.77695	13.3287	7.0092	9.82564	8.92998	2.32609	2.049	4.75743	4.23964	11.7607	20.8086	13.0528	6.14637	8.99081	9.34191	16.7452	8.22323	39.1683	15.6648	28.7395	26.4451	49.8933	27.2246	40.4762
59.01545806_335.3394843__[M-H-CH2]- 74.0363 [M-H-COCH2]- 102.033_44	241.502	263.121	200.797	116.367	236.091	266.503	122.981	105.329	113.311	114.943	153.776	61.3781	96.4906	104.556	76.4543	63.3627	67.4488	74.9941	55.5702	35.0593	31.0873	43.7696	50.9334	53.3868	59.0538	66.1459	60.3326	76.1381	68.0732	55.5048	48.5037	78.0886	50.8157	104.233	78.8565	76.9342
59.00871126_1114.650798___5234	24.6488	78.7318	55.7123	8.92557	35.4031	45.9621	50.8789	18.0885	32.2713	48.4656	42.2177	48.4049	54.8896	92.8168	138.054	95.9265	74.3704	76.7764	73.8681	72.3297	57.7021	57.3547	117.786	145.372	40.762	66.2702	38.6798	37.1499	57.3425	44.3599	12.8581	34.9708	60.1487	48.6531	38.0449	51.455
59.01569394_502.7235171__[M-H-C3H2O3]- 146.024_3	168.187	133.517	87.559	53.1876	83.6446	110.902	50.5771	39.8446	36.3161	47.9988	56.8575	26.1099	50.6535	65.1566	61.6536	77.4447	54.084	54.2459	59.5645	73.6745	69.5819	36.5934	48.0882	55.601	55.5848	100.007	82.0792	84.2346	51.5775	72.0446	40.9895	60.4257	50.1258	68.4916	34.1046	38.8141
58.9963628_1045.59337___5650	24.2117	113.671	122.351	39.4698	117.604	73.0869	76.8982	117.219	94.8563	140.172	116.806	30.2749	76.7156	81.5978	76.3554	70.8666	65.637	84.0713	100.155	49.422	54.4286	162.117	194.011	133.912	193.243	135.036	101.462	92.7616	80.1087	67.168	70.3041	133.824	50.34	80.0635	68.247	148.998
59.01587781_260.989853___4770	225.17	240.565	213.648	134.43	168.55	148.926	102.046	142.338	117.194	73.0463	88.0896	57.34	120.606	90.8258	122.498	43.4212	62.311	42.8679	51.4556	57.9722	47.2591	34.266	43.0262	50.4025	93.4851	75.3991	111.959	22.6972	43.7569	88.7845	44.8908	40.7719	23.9101	51.7704	37.9976	35.4201
59.00615599_1006.601207___3543	19.4798	59.4707	57.5806	4.40754	48.1534	35.0089	38.6671	39.2875	27.9052	51.7572	49.1527	21.7307	119.814	75.7429	61.038	55.9061	34.7972	42.8702	48.9167	25.7398	89.4542	94.3193	100.672	43.0375	79.2925	341.052	25.5986	53.8405	79.3945	58.3475	41.591	31.6604	29.7568	72.8017	707.353	67.7587
59.01524452_374.21332___6397	24.4714	105.832	58.1296	22.2328	89.5371	74.0534	62.3789	72.3699	36.2549	92.5519	102.717	35.0871	35.5102	52.1718	48.0473	43.6704	32.4624	52.1321	43.7706	49.0557	51.651	57.3913	78.6901	66.1345	58.8149	45.0028	41.26	45.1297	70.7534	85.8722	79.3372	98.2104	56.3043	92.693	58.1804	76.8619
59.01488161_452.2493599___2658	38.9818	110.247	54.1015	44.3676	123.252	59.8003	69.9565	32.8199	36.6654	56.066	94.8521	48.0108	35.4598	45.93	38.7551	33.7991	49.6093	49.7187	45.7444	41.8616	45.341	66.2844	55.7458	65.7352	43.2213	71.8215	66.2059	78.3123	35.1831	60.7414	59.8913	88.9858	73.4983	126.317	95.4012	76.5765
59.05497653_471.2383782___1382	24.512	23.034	27.1372	152.192	221.512	145.82	91.926	74.5574	68.6327	31.9834	41.5081	34.9138	20.2506	13.0043	20.534	4.8375	6.47854	9.03845	0.0182778	6.9813	8.25283	4.57395	2.53417	12.6517	21.601	56.9483	31.5583	22.4283	21.6647	16.608	15.7653	8.61673	17.6603	17.1029	10.2232	9.56286
59.06843124_397.90468___252	34.5077	37.15	35.1604	53.9179	98.0521	42.7398	39.3877	40.2222	48.9069	68.9861	46.1077	48.6278	17.6772	18.2081	25.0478	19.3513	19.3754	22.5789	13.9023	18.5949	10.3026	27.4822	22.8109	41.0014	81.3351	106.086	37.8005	36.4603	32.4699	58.0739	34.6759	40.1978	26.5051	23.9437	34.0691	31.8277
59.19258758_1114.999684___5235	29.5786	55.4812	31.0374	8.92555	66.4926	31.8725	27.3964	36.1164	52.2438	32.249	15.3517	17.5712	33.8462	46.8991	86.0385	76.4918	78.9899	38.2804	53.802	68.3175	51.7676	68.6734	93.9174	112.474	46.9489	42.127	22.5641	22.8252	27.2777	52.6231	19.2897	40.8796	27.0696	38.1605	17.2662	48.1882
59.24332546_471.6126159___1383	14.6429	27.5704	19.281	172.118	123.089	127.56	67.0282	103.57	60.3934	23.9615	18.9965	26.1549	17.679	18.165	11.382	4.8315	4.30822	0.0207037	1.98586	9.29727	4.12147	9.13738	7.59348	7.58197	27.7418	29.858	44.1295	25.2	16.2104	11.0259	15.7469	17.2134	17.6387	23.9138	13.6155	3.18045
59.35276127_738.1545692___4675	9.68043	4.56555	15.4975	8.80212	21.9914	10.4638	23.243	25.3315	16.2008	4.0028	3.76086	0.0396846	0.0232039	5.35304	16.3893	7.39772	0.0198348	4.66845	6.16862	9.56393	4.25474	18.8814	10.4402	7.85972	3.03972	6.01938	3.08641	2.76055	22.0001	36.4971	27.8976	36.9626	14.5337	35.4142	23.5681	36.7811
59.38463003_1113.033469___5278	4.92137	36.5115	46.5571	13.206	34.9341	31.4035	46.3286	18.0624	32.2248	20.1555	30.2848	34.6854	17.7366	89.4332	107.951	143.069	89.2391	81.1737	105.595	42.0005	81.5362	92.6526	98.5468	168.2	59.4706	54.1713	34.9599	16.8997	60.747	89.7609	28.9031	26.2394	41.5461	27.7611	34.5444	70.694
59.42566591_469.0393116___1334	73.8286	27.7816	60.466	157.446	166.983	175.217	74.4284	114.028	105.314	40.2506	45.9335	61.5239	10.1956	13.0921	16.0805	7.29407	10.8658	11.3733	8.00808	2.33978	14.5344	4.60448	5.10219	10.186	40.3816	15.0647	47.6548	19.7245	16.3547	13.9058	12.6831	8.6753	17.754	13.7709	3.42677	25.6708
59.5219143_501.3686778___3	115.509	91.9672	103.391	37.1755	61.1358	74.5677	7.77396	10.853	12.0909	0.0365366	0.034555	0.0396846	2.53289	5.20581	2.28346	7.26055	2.16032	0.0207037	3.97061	4.7147	2.06236	2.28418	5.05556	5.05463	12.3523	5.99091	3.15358	2.80059	8.13313	11.068	0.0290452	11.4911	5.88923	6.83056	10.2152	12.7627
59.5465806_1105.847806___4351	33.9583	161.53	229.187	17.5841	152.746	97.6743	211.261	176.868	437.571	249.977	45.3737	118.566	49.5754	75.9694	93.7614	80.0962	70.6161	76.7428	135.62	34.8205	104.599	88.6253	118.544	232.717	40.1561	21.3559	31.7453	48.5536	33.194	114.316	44.407	28.7707	56.3625	30.8301	44.3671	48.8556
59.55611536_1043.357396___5647	68.1668	115.355	96.1698	66.195	163.631	52.5172	104.45	78.7126	115.693	87.8567	205.593	60.9354	99.3842	177.97	149.193	95.9517	65.203	59.2074	730.762	53.8304	64.4632	130.068	127.076	691.946	102.528	117.578	108.482	120.766	83.2441	103.882	115.507	104.754	83.4336	104.115	75.4815	107.834
59.6247455_418.8118456___6	225.523	159.287	228.873	44.2994	52.8555	28.1264	42.8146	39.7006	40.3653	24.041	22.8121	39.3173	22.789	15.6288	20.5589	9.69248	10.8013	15.8315	7.95431	9.32129	4.13153	11.4669	20.3014	17.7349	21.6182	29.9511	31.5463	8.42981	5.43261	30.4018	15.7979	37.3194	17.6775	17.1432	20.4845	19.1624
59.71271029_501.5098451___3	43.1041	68.9686	113.207	22.1069	39.6341	77.4455	3.88698	3.61766	8.0606	7.98066	7.57414	0.0396846	5.06579	2.6029	6.85039	9.68073	0.0198348	4.51449	5.95592	2.35735	2.06236	0.0210019	2.52778	0.0232341	15.4404	17.9727	15.7679	8.41256	10.8442	5.53401	9.43548	0.0264366	2.94462	6.83056	6.81015	6.38133
59.71850289_704.8885316___8753	4.92541	4.57753	7.875	0.0402612	0.0400679	3.50461	7.77734	3.68168	16.4503	4.07504	0.034555	8.86421	0.0232039	2.66843	4.69533	2.46432	11.0319	6.90512	6.08379	0.0213417	4.18788	2.32768	7.72128	7.74678	12.4396	12.0021	9.41639	8.3901	13.6345	13.894	18.8134	11.4132	17.6109	30.3134	6.75047	22.4735
59.743753_1112.729262___14	19.4744	92.5404	217.08	22.0368	127.85	104.925	215.988	153.399	407.03	296.854	41.6919	73.8837	38.0956	106.153	103.854	108.785	78.4546	47.5413	113.555	48.9021	75.6483	95.6984	140.004	119.881	43.3436	39.2661	15.9096	33.8787	41.0074	47.2077	38.1196	25.9576	35.6562	30.8985	10.2513	41.9266
59.74572866_1068.548968___6168	29.1759	91.2758	65.1134	39.5742	96.2125	62.895	50.102	62.5466	162.472	79.5919	79.3361	60.797	88.8098	255.426	199.588	124.932	56.39	40.5733	290.33	37.3684	47.7288	43.5416	132.968	110.254	74.5681	30.2466	47.6635	65.5631	63.0585	47.3037	51.302	49.1007	89.7003	55.3912	54.9129	48.5001
59.81661242_419.4375683___6	474.597	507.29	486.62	35.4399	87.9807	77.2519	42.7575	40.1887	40.8842	20.0107	30.3727	21.8429	30.3443	36.4048	15.9704	14.5205	2.1581	27.1061	5.95967	11.6375	6.18955	16.0527	20.2693	15.186	43.1779	38.8851	47.2646	25.2563	16.2767	30.3598	6.31356	22.9601	14.7305	17.1341	10.233	25.5152
59.82728557_397.7562807___253	9.75285	13.7848	46.3743	4.43881	52.9254	42.2088	31.1192	40.3665	44.992	16.0311	18.9721	34.9898	17.6949	36.4559	15.9563	21.823	10.7876	20.3487	11.9449	30.773	12.3929	16.0694	22.8639	20.2465	30.829	89.9215	22.1023	47.7949	40.6729	66.1661	25.2786	40.2957	26.5696	20.5762	17.0763	12.7459
59.92610141_1112.814496___14	34.0802	148.771	186.19	13.206	96.2936	55.9598	159.629	105.149	312.932	88.6608	41.6919	86.922	20.3177	382.266	289.174	493.684	166.809	213	354.858	46.0248	200.298	224.371	250.762	400.1	52.6315	48.2664	60.9314	36.702	46.4229	41.6053	44.4257	23.0734	32.6848	17.1658	30.754	25.7684
60.01008411_420.1624149___6	526.302	412.94	727.574	89.5744	79.0962	105.229	62.123	47.4214	44.8138	35.9796	22.753	26.4926	27.759	25.9707	43.3003	14.5038	12.9178	13.5386	9.91963	18.5791	18.5475	11.4392	12.6528	12.6382	43.13	65.663	40.9175	39.2006	21.678	41.3078	22.0447	31.5052	26.4567	41.0359	27.2291	28.6358
60.01355701_401.0789468__[M+Cl]- 25.0406 [M-H]- 61.0238_1	148.96	172.895	86.4297	26.9644	31.1989	56.8797	43.2512	18.2809	48.9074	32.4084	34.526	8.85558	33.2585	36.4149	18.221	14.5132	21.5494	20.3248	7.94538	11.6224	18.545	11.4483	17.7424	10.1145	81.1097	102.119	79.5639	36.9412	37.9295	61.3845	19.1673	34.9075	17.9031	55.4556	17.2622	12.8988
60.13278819_1072.696442___41	343.586	229.163	232.293	252.313	291.787	236.498	194.186	206.553	221.776	151.033	234.511	113.418	666.929	1227.56	578.547	218.767	223.403	201.487	335.603	170.095	137.042	73.7111	85.2093	248.003	340.167	435.558	508.572	204.524	102.398	179.948	82.7016	181.642	135.598	176.378	83.3926	96.3677
60.12273022_1113.150287___5270	34.1345	73.2012	99.7879	22.0368	65.76	38.523	81.1749	50.0338	117.945	79.7739	49.2726	30.4227	25.3971	348.109	231.165	383.769	166.398	159.817	363.897	63.1516	235.52	191.08	301.2	433.134	40.2476	36.197	47.7502	44.8035	41.0074	49.9846	31.7664	17.3269	20.7975	27.4971	30.754	38.6491
60.19658624_419.1591463___6	591.784	621.217	735.23	112.244	108.905	84.1869	66.082	43.2541	52.3384	15.9869	49.3535	21.8163	37.8881	25.9782	22.7847	31.462	8.62058	20.3078	5.95871	11.6374	24.7584	9.1627	7.604	15.1661	46.1977	82.2554	47.2635	25.2572	27.0989	27.5656	18.9352	25.8365	8.83876	34.2445	13.6402	22.2976
60.20029228_400.168618__[M-H-NH3]- 78.226_1	208.175	153.042	187.322	62.9168	44.6449	60.5375	66.9525	43.3586	80.5411	20.2552	57.6394	22.1389	61.4003	31.6187	36.484	36.3247	19.6502	18.0861	11.9314	20.9443	14.4404	11.464	35.5244	30.3768	123.923	153.525	173.449	45.5429	49.4134	72.5453	57.5018	55.3605	35.8063	59.0206	44.8818	58.0446
60.30992159_1112.815906__[M+Cl]- 25.3425_14	9.73721	68.6261	72.9219	22.0368	83.1627	69.8628	61.7714	86.062	63.7667	83.7626	52.9984	30.4227	30.4765	1397.7	474.314	901.925	206.352	297.827	453.402	351.156	422.085	242.067	343.513	451.334	211.544	63.3447	370.728	127.386	178.134	178.773	394.173	222.347	167.796	44.6312	202.399	321.565
60.32338211_1072.301924___41	347.592	299.132	330.162	264.558	182.26	257.544	116.981	131.313	234.612	290.514	193.402	184.546	493.122	1373.55	511.861	162.516	226.345	186.052	273.348	163.686	178.095	78.3893	84.1822	172.675	303.912	520.871	418.359	144.076	125.389	237.427	342.03	147.945	133.927	189.612	132.315	164.521
60.3934602_419.1325504___6	183.036	174.348	381.055	26.5493	65.6068	95.4055	42.7575	47.4957	20.4052	16.0086	34.1693	4.36307	22.7582	36.3589	22.7896	21.7808	12.9486	6.76929	9.93053	20.9476	12.3794	18.3243	25.3396	27.8347	24.6457	135.316	40.9626	30.8688	21.7023	16.5599	9.47034	22.9601	23.5688	17.1177	20.4659	15.947
60.5032797_1112.521561___1613	14.6058	45.6935	65.1673	22.0101	56.8314	34.9314	30.8857	32.1249	43.7834	55.6076	37.856	17.3627	32.9762	1372.8	358.872	842.272	194.708	263.032	321.772	354.529	282.374	203.259	236.768	319.594	114.428	77.3356	388.374	134.976	202.545	176.269	335.112	235.414	117.552	20.5768	145.731	301.929
60.516541_1072.206546___41	58.5025	150.825	222.157	88.5211	123.744	215.812	184.622	196.094	116.757	182.571	141.083	169.298	247.142	1137.85	459.59	60.5097	242.895	188.009	51.9611	93.7581	137.839	46.6158	74.7666	144.878	173.934	272.688	316.318	81.5364	98.4171	84.3614	133.889	66.0062	70.0251	65.8205	58.5228	115.817
60.58376745_413.0465696___154	82.8559	156.384	157.649	44.3049	44.0023	56.1972	42.7606	61.3033	48.3289	32.0008	22.773	34.9553	196.425	176.252	190.73	36.8748	41.8782	36.7247	8.06935	30.6722	35.62	25.5932	23.1784	41.0374	74.9975	158.763	118.723	34.1463	35.7543	36.3565	22.3963	32.0834	11.9506	20.8699	34.5696	16.163
60.57599352_450.1013869___2820	29.2209	27.561	42.4315	71.8313	92.3452	87.8761	58.2973	72.1668	80.347	12.0219	22.7611	39.271	12.6645	15.5755	18.2129	7.25295	19.4109	9.02921	9.93159	9.31503	8.23298	6.85779	7.59244	15.1556	21.5913	29.9312	22.0649	14.0037	5.4146	24.8493	6.31432	20.096	14.7028	17.0777	10.2361	28.7211
60.69476196_1113.016808___5279	24.343	79.5775	50.4269	26.4442	70.0317	34.9748	30.8857	46.4599	23.9125	135.352	49.2722	30.4227	27.9368	991.763	215.164	718.396	211.281	127.209	245.121	317.616	184.566	161.555	151.278	179.312	113.521	66.3611	115.165	59.2878	139.609	134.484	191.456	175.889	82.982	34.3317	129.85	262.029
60.75719998_449.0306447___2821	24.3776	50.5911	23.1668	65.6812	52.8246	66.7725	35.0292	43.2114	80.4469	12.0194	22.7587	39.3185	15.1964	2.59858	2.27952	7.26255	4.31254	9.03913	0.0182778	13.9905	6.18143	9.15411	12.6685	12.6438	9.26396	20.9518	18.9343	11.2173	13.5379	8.28304	6.32248	11.4967	2.94407	13.6787	0.0313307	19.1765
60.77691692_413.0313947___8564	48.7388	59.661	69.5789	17.7017	48.4025	42.1479	50.5352	46.879	40.2741	12.0148	11.3865	17.4565	140.327	227.021	163.316	44.2194	30.6749	18.3623	6.04111	16.5158	12.5455	25.5477	12.8541	5.13472	82.5554	108.436	137.248	19.9187	22.0484	22.3732	22.3963	20.3806	11.9506	20.8317	13.8279	16.163
60.88126607_1113.073437___5265	24.6489	63.9685	107.605	0.0402612	61.2031	17.4657	15.4619	54.2785	50.0999	139.383	15.1608	47.7471	27.9028	688.757	102.658	522.962	92.4181	83.0921	187.249	167.139	112.234	136.249	133.503	130.317	68.9666	67.844	162.537	56.3924	98.4997	64.8975	73.0626	59.1531	35.6529	20.8527	76.1161	124.201
60.87050129_741.2465578___4676	0.044486	9.1327	3.87906	8.79929	30.7888	13.9691	54.2999	110.062	45.5945	16.0269	11.2808	4.35915	7.69361	2.67666	9.49757	19.9846	11.0445	13.8326	4.05443	7.08102	4.19457	11.6363	23.1461	23.2431	12.1544	23.6893	21.6241	27.6288	24.4485	36.9437	49.5757	47.0952	68.1854	154.055	59.9148	143.602
60.95948881_446.2134733___2822	59.0517	55.691	39.022	67.2554	102.183	134.794	74.6134	82.5267	80.178	48.585	34.5036	70.5303	15.3371	7.86571	2.30024	0.0221872	17.4073	2.28301	6.02819	21.1794	8.32995	11.5664	23.4091	57.0976	37.3847	18.1236	35.0712	16.9842	10.9315	13.9267	12.7587	23.2352	5.94934	20.7294	31.0355	22.5724
60.97386712_413.0360373___154	68.2343	27.5358	34.7895	27.7482	52.8027	28.0986	42.7606	39.6668	20.1371	36.0009	26.5685	34.9129	161.407	102.594	102.357	17.1767	21.8708	16.067	20.137	18.8752	14.6365	6.96755	7.71248	15.4042	56.2615	113.545	47.9129	17.0731	27.5033	33.5599	15.9974	20.3806	11.9506	38.1915	24.1987	29.0935
60.99142489_634.2393693___1944	0.044486	0.0417716	3.86146	13.2098	4.39351	10.5008	7.75737	7.20238	8.04767	4.01167	0.034555	0.0396846	7.65584	5.27451	9.25096	9.76281	6.53725	4.56539	4.02042	4.69881	6.24526	2.30645	2.55021	2.5565	12.4247	30.1823	3.17731	11.3459	21.8938	62.9799	3.1963	0.0264366	8.94345	13.8234	6.86793	6.4572
60.99106392_484.6126191___100	19.5165	9.21017	38.6126	17.7638	26.4835	45.6292	19.4667	21.7464	16.1866	140.958	130.367	94.5058	7.60309	31.2445	13.7042	16.9263	12.9647	11.285	5.96135	6.97741	16.4979	4.57351	10.1262	7.60162	21.6265	20.9776	9.46621	11.2216	10.8557	27.654	6.30178	8.60548	20.609	19.2113	30.6469	12.7647
61.06084319_740.2273645___4677	4.82899	4.5556	11.6069	17.5582	4.38761	13.9367	73.2712	43.3254	32.3197	19.9879	15.0272	8.6955	7.79044	8.11948	7.11115	9.97366	13.4165	6.97882	8.2107	4.76519	4.24691	16.4962	23.4373	2.61482	18.2143	14.991	9.23693	27.5418	24.4126	46.9451	30.6461	67.8498	36.2499	129.201	66.0486	88.9093
61.08433794_1114.285983___5280	44.3785	78.7311	42.7477	8.94211	13.299	35.4136	19.6048	43.4132	20.1701	125.379	19.1894	8.80056	45.6605	469.722	84.8952	264.976	67.8784	47.3408	123.156	101.101	81.5215	85.3654	83.6266	74.1049	40.7574	56.6977	38.7503	22.8644	49.157	47.147	41.7943	23.3571	27.1199	20.8493	44.9686	67.5483
61.16623553_413.0695418__[M+Cl]- 26.1912_154	48.7388	36.7145	65.6397	8.84082	61.6032	70.2465	31.0986	36.0608	16.1096	32.0008	30.3639	13.0772	46.1626	55.8596	74.6853	24.4964	15.3096	13.7237	16.0819	11.797	4.17489	4.63714	23.0981	7.68739	37.4459	140.562	44.6462	31.247	24.753	31.2289	3.19349	29.0652	20.8777	13.8644	6.91393	25.8609
61.18153832_490.6027626___60	58.2215	54.4986	73.0811	22.0951	26.3769	10.4959	3.88309	7.22314	4.03264	95.677	123.227	184.917	7.66503	10.4996	9.21536	7.33156	6.53788	2.28165	10.0259	7.05128	12.5086	4.62233	2.55741	10.2075	15.5754	19.9008	12.7637	5.67131	8.20617	8.36772	3.18284	8.7058	8.92783	0.0314148	6.88262	12.906
61.28259067_1114.818622___5212	24.6488	36.9875	54.3154	13.3883	13.2985	60.2035	7.82754	43.3397	16.1361	95.7508	30.7034	0.0396846	25.3386	288.066	89.5287	156.14	119.353	38.2804	77.8102	86.7082	73.0976	48.1247	64.5115	80.2698	34.4292	42.127	9.67031	45.6505	35.461	47.9965	16.0747	11.6799	24.0618	27.8018	37.9855	57.8258
61.33723973_328.6182198___3705	14.6409	18.3628	27.0277	22.172	22.0183	14.0666	3.88946	10.8341	16.0804	4.01505	3.79797	4.37098	2.56377	18.518	11.5702	17.2293	6.57464	2.29934	6.05395	7.09299	10.4659	4.65512	2.57678	10.2872	3.09247	30.4062	6.33086	14.0584	11.008	33.6077	6.34171	11.5359	8.97546	20.5758	20.515	16.2105
61.36848068_491.1631944___60	24.3028	45.8819	105.475	8.85849	26.3743	24.4872	15.5318	25.3173	16.1463	57.0712	93.0217	77.8475	15.1746	7.79272	15.9638	7.33117	4.30871	4.5085	5.95303	16.4523	10.2973	16.1774	5.05304	5.05018	15.3966	38.8607	25.2021	13.9933	8.11155	5.52062	3.14155	8.59078	0.0271353	3.41373	6.79277	12.7387
61.42913072_844.7510804___5779	4.86436	231.819	250.929	17.8795	22.2283	14.1767	39.2669	25.6395	24.5067	4.05163	0.034555	4.41652	10.2104	13.1896	18.3712	7.32707	13.0978	11.3683	14.094	11.7477	8.31653	4.61265	15.2862	17.8868	21.4829	21.2268	24.9055	24.9182	5.50529	14.0383	18.2445	20.0774	5.82101	53.5977	10.1988	13.0209
61.46660208_1116.123831___5281	9.84313	36.9876	34.9165	17.8214	39.8284	31.8199	19.5688	32.503	28.1893	32.2564	22.9884	17.5719	27.8708	133.109	97.6836	114.645	87.9148	47.1146	81.6994	46.7785	72.7621	55.4945	86.8209	79.0444	65.4965	51.2088	25.7865	51.3505	24.5754	60.9948	28.8754	43.7136	15.0372	38.1642	34.5273	35.3753
61.61537662_845.0189591___5780	14.5931	160.33	267.734	8.81292	4.4454	14.1767	54.9737	18.2705	28.585	16.2065	15.0832	4.41652	5.10519	7.91377	13.7784	4.88472	8.74382	13.6243	0.0182778	2.34649	6.2374	9.22531	12.7385	12.7904	6.1475	15.1422	18.6791	13.8699	8.25793	5.61216	6.08923	14.3277	8.73123	20.0991	10.192	19.5313
61.62551684_738.5839421___4678	0.044486	0.0417716	3.86994	8.78108	4.39262	6.97587	15.4953	25.2725	50.6555	8.00561	0.034555	8.69735	10.3871	13.5288	4.74141	14.9601	11.182	11.6309	4.10514	7.15968	0.0189364	14.1361	18.2333	15.6877	12.1423	8.9989	12.3169	11.1601	24.7501	32.1599	24.7687	17.0402	17.4204	71.4326	26.7456	42.3942
61.6542792_1074.054777___41	53.5532	222.922	236.591	35.3176	148.277	80.2908	77.364	67.9037	169.588	79.7498	200.007	30.4666	179.997	213.358	309.339	53.2345	91.9719	69.2263	187.523	42.1429	68.4956	71.6996	122.137	99.9975	123.889	154.422	86.0881	67.1209	35.7388	39.0677	81.4247	101.723	50.8161	93.6778	30.9239	134.049
61.67620993_1115.069715___5282	24.3817	31.2418	49.9586	8.82651	17.8003	14.2198	47.1461	21.4662	15.9575	39.9408	30.8216	26.5052	27.9738	263.46	100.503	184.95	134.544	82.5339	119.08	30.4482	96.3225	84.3448	129.441	94.9192	21.7024	30.1597	16.1776	25.8107	30.1203	33.3596	12.7131	2.88753	27.1719	20.6161	10.2596	42.6376
61.81617517_739.7081287___4679	4.82908	4.61508	3.86994	4.39054	4.44557	10.4523	38.6931	35.337	40.4076	15.99	15.0271	13.046	5.19356	8.1173	4.74141	12.4667	8.93024	9.30474	8.21028	9.53018	8.47935	4.70435	15.6029	18.2713	12.1423	8.9989	9.23767	13.9501	13.705	41.9649	37.153	25.5603	14.517	76.9803	50.4442	48.1596
61.84673463_1073.870998___41	43.8744	329.708	217.601	39.7323	200.354	84.4858	69.6276	39.3648	166.908	110.651	149.372	47.9504	227.26	182.843	318.066	46.2311	170.249	93.8382	177.418	39.8016	83.3312	55.3223	86.59	140.031	149.936	157.228	95.6427	54.7096	41.237	44.6489	57.9392	145.417	63.162	78.2317	17.2333	135.57
61.86678181_1115.18985___5216	9.73715	37.1187	42.2165	22.0663	31.0869	17.5108	23.2241	14.2914	43.883	39.9408	38.0844	17.6343	22.8573	207.428	127.374	155.406	66.7014	109.143	106.49	67.6172	59.8301	93.4213	147.266	104.88	9.28858	36.1911	12.7505	25.7586	24.6097	58.2879	19.0696	5.76702	35.6872	24.0205	17.0761	48.3663
61.98986193_1142.686385___7642	92.3392	159.95	88.0824	70.4002	122.246	111.775	107.894	92.6099	95.4259	128.998	128.443	108.492	48.7975	73.8348	73.9674	86.6068	61.445	45.6157	50.543	63.9205	46.1824	48.8358	54.0034	54.2643	180.556	183.479	273.79	230.405	188.226	171.192	233.684	159.362	222.976	287.22	194.988	173.865
62.00594557_738.1545692___4680	0.044486	4.61496	7.85722	13.3465	26.6742	3.53599	43.1973	14.6568	32.8143	4.05701	0.034555	30.8958	5.19347	32.0259	4.67751	14.7556	13.2515	9.19298	4.05368	14.1239	14.6653	11.6197	5.13972	23.2136	15.3865	18.0029	15.6147	45.9325	35.6898	16.8151	22.0001	20.1466	44.2183	44.1105	39.785	32.1715
62.02546302_783.1380995___6951	4.85176	13.6887	0.0352303	22.021	8.78817	6.98503	3.87345	32.487	28.2109	12.003	7.5475	4.35419	2.59272	13.4038	9.42326	9.92019	15.5595	4.66833	8.19122	9.55357	12.7227	41.6471	90.105	86.4261	21.3954	11.995	3.11345	13.7968	16.5203	22.3984	28.6511	32.1351	43.6845	105.386	56.3799	111.293
62.04120163_1074.054777___41	58.6009	179.494	136.74	48.6339	118.165	73.6577	103.778	89.4655	142.569	107.512	155.271	74.1051	156.572	175.636	244.347	51.176	80.9009	79.4242	150.603	37.5263	66.699	55.5077	73.118	94.8344	78.0145	102.445	68.9595	66.888	35.7913	69.8632	64.3769	100.969	62.869	92.0891	65.4866	99.9089
62.06481214_1114.083376___5283	24.6547	37.0499	73.8369	4.47105	26.598	14.1654	15.6551	21.7066	20.1701	36.3405	26.8651	8.80056	35.5137	894.854	312.928	425.96	226.183	187.016	206.479	255.153	210.243	104	197.655	185.698	25.0814	39.6863	16.146	8.57416	19.1166	38.827	9.66502	17.5178	15.0666	13.8995	31.1321	48.5131
62.11427288_474.7099907___2	400.292	293.144	169.134	31.0617	70.6215	45.8353	19.4671	32.5994	8.09008	31.9924	26.6139	8.73578	5.06157	20.7961	20.5303	7.26782	10.7965	6.77619	5.96306	4.65991	2.06284	4.57926	7.61164	5.0607	229.007	486.911	284.561	47.8369	29.7922	34.1103	15.7876	8.61484	20.6045	10.279	3.41056	3.19226
62.12671261_423.8709944__[M-H-C6H10O4]- 209.188_13	1048.49	852.787	863.99	349.37	355.156	483.421	35.0159	46.8278	32.2017	24.05	30.4135	17.448	100.53	107.244	97.0199	17.1723	10.9584	20.6498	18.126	11.799	16.7344	13.9326	5.13629	15.3922	28.145	72.9135	31.9562	28.4442	22.0407	33.6338	12.7982	11.6395	14.9272	13.8684	10.3753	12.9329
62.15918158_501.4865824__[3M-H+Cl]2- 30.115_3	222.549	176.463	296.346	48.7098	74.8644	52.6153	0.0353867	3.62334	12.1101	12.0017	7.58369	8.6942	0.0232039	18.2203	4.56693	12.1009	12.9619	11.3025	21.8384	6.98087	6.19674	11.4392	0.0232272	10.1224	12.372	20.9682	12.6466	2.80797	13.5552	5.53401	12.612	2.87647	14.7428	13.6995	3.41049	9.57199
62.21603219_782.6309628___8823	14.5552	18.2517	11.589	0.0402612	17.5762	6.98439	15.4901	39.7108	12.0908	4.00108	0.034555	8.7086	2.59283	15.8578	9.29194	19.5631	8.89354	9.18299	10.2439	0.0213417	4.24104	70.2939	75.3344	91.1603	39.7279	15.2032	6.22446	11.0289	11.1734	45.4436	37.1994	83.0971	34.7722	117.504	48.507	100.664
62.26282157_1113.84997___5217	4.93997	13.7075	15.5448	0.0402612	17.5124	13.9893	11.5964	32.5671	16.1403	20.1939	15.1608	4.34064	22.8296	989.796	224.042	398.552	199.093	178.976	190.725	251.547	156.665	95.1144	151.648	156.103	40.753	30.127	9.55004	19.7373	13.6525	36.0564	6.43268	20.4768	18.0486	13.9018	41.5179	45.0345
62.30736809_474.685899___2	175.337	97.808	150.676	44.3285	30.8969	52.8058	31.1473	25.6494	36.8276	11.9972	30.4159	17.4495	25.3079	18.1966	22.8115	7.25766	6.4779	4.51746	1.98769	6.98067	6.18851	4.57324	10.1325	10.1214	230.034	343.461	230.776	30.8419	16.2503	19.3387	12.6121	17.2297	11.774	10.263	10.218	6.37626
62.32244376_423.9377462___13	597.024	816.105	1090.46	404.357	350.747	537.401	27.2346	25.2537	32.2446	16.0333	71.6569	13.086	93.3133	85.0497	80.4288	27.0345	32.8753	11.4721	8.07065	9.32218	12.5739	6.97885	5.14525	12.8498	6.2671	66.8374	25.6113	48.4462	16.5305	16.8169	9.61805	23.2791	11.9418	13.8963	10.3942	12.956
62.35161154_501.5084634__[3M+2Cl]2- 18.2481 [M+2Cl]2- 54.7646_3	252.071	180.861	275.213	26.5283	35.1744	48.2983	7.77147	7.23532	0.0365954	3.99481	3.78583	4.3471	2.53289	10.4116	6.85039	7.25061	2.16032	4.51449	7.94123	2.32374	8.24942	6.85254	5.05556	12.6366	12.3523	11.9818	9.47265	2.80404	8.13313	5.53401	3.14892	0.0264366	20.6123	6.84031	3.40093	6.37336
62.41411873_782.4590621___8824	0.044486	9.10381	15.4512	4.39873	0.0400679	6.98503	7.7362	7.21933	8.06025	4.001	3.76902	8.70838	18.1166	5.35238	11.7575	12.3788	6.65696	6.98624	4.08885	11.942	8.46632	25.8846	33.4519	39.0242	27.5084	17.9925	12.4362	16.5389	19.2736	11.3401	49.5957	8.56495	29.0922	105.438	54.5178	71.4388
62.45478001_1114.242172___5284	9.86189	18.525	38.8615	8.92555	22.165	17.7068	11.7413	7.23554	4.03402	32.3027	23.0272	22.0014	25.367	673.129	143.682	436.759	185.849	63.1211	128.684	183.288	130.911	28.0505	118.036	101.882	37.6222	30.1246	19.3752	25.7225	16.3857	11.0934	12.8598	17.5178	24.1065	31.274	27.673	28.9493
62.49745848_474.9859855__[3M+2Cl]2- 18.3554_2	79.3391	63.6604	78.1353	26.9736	22.0692	38.7242	19.4671	25.655	36.8354	15.9962	11.406	22.1211	15.1665	10.3859	6.83381	16.9345	12.9552	11.2769	0.0182778	2.32665	10.3013	6.85163	15.1801	7.58136	147.988	207.129	172.443	19.6266	13.5429	16.5714	18.8945	11.4687	11.7596	20.5015	20.436	15.9405
62.51451388_423.9768731__[3M-H+Cl]2- 30.3559_13	681.191	356.628	630.239	228.275	236.837	257.901	62.1731	39.6235	52.3278	16.0333	15.2067	13.086	46.2301	65.3867	75.2988	19.6255	24.1086	20.6078	6.04199	9.43923	16.7344	13.9326	12.8407	12.8269	37.5266	36.4568	22.3694	34.1331	19.2856	50.4507	15.9977	29.0988	8.95633	27.7369	24.209	22.6326
62.52648422_501.0444219___3	232.37	180.881	198.447	26.4999	26.3595	34.9891	7.76489	10.8561	8.06392	7.98216	3.78176	4.34203	20.5165	10.5399	18.5013	7.34129	4.37476	9.15998	6.03097	4.70617	6.27739	4.63552	12.8223	5.11832	12.3373	18.1972	9.47196	19.6293	8.23526	25.2189	6.29779	0.0264366	14.7223	13.6782	20.6864	3.23076
62.55186479_844.73235___5781	239.499	178.729	199.034	8.94007	8.76526	10.6326	15.7109	0.0328174	0.0365954	0.0365366	3.82613	0.0396846	5.10526	10.5537	11.4824	9.77082	8.74428	4.54759	6.04228	11.7483	4.15938	2.30687	12.7387	7.66828	24.568	8.96047	12.4365	8.30664	11.0152	16.8548	12.1543	11.6334	5.81216	6.68528	17.2399	6.41381
62.6470132_1114.282825___5285	9.8431	27.7874	23.278	4.46278	4.42538	17.6775	7.82754	0.0328174	24.2041	0.0365366	15.326	26.4017	15.2032	342.177	79.4043	245.012	157.03	31.525	103.258	122.002	61.1022	52.7671	95.9762	40.4091	12.5197	21.0872	22.5641	11.4126	16.3857	19.3875	16.0747	20.4023	21.0541	17.3457	10.3597	16.0829
62.70349675_424.0878304___13	288.195	297.73	261.173	115.531	119.92	86.9133	27.2346	43.292	32.2446	20.0416	30.4135	13.086	41.0934	70.7862	23.1786	12.2659	17.5335	9.17768	10.0883	16.5186	16.7652	9.30513	5.14525	25.6997	31.3355	69.8755	15.9781	28.4442	8.26525	53.2535	22.3968	14.5494	11.9418	31.204	3.45843	22.673
62.7437091_844.9502726___5782	208.694	167.626	147.796	13.4101	17.5305	3.5442	15.7109	18.2782	12.1014	8.10392	0.034555	4.41671	2.55263	0.0238966	6.88944	4.88541	4.37214	6.82139	4.02819	2.34967	10.3985	9.22748	10.191	5.11219	9.21298	5.97365	6.21825	13.8444	8.26141	8.42738	21.27	11.6334	5.81216	6.68528	10.3439	6.41381
62.82636278_1114.240162___5238	0.044486	41.7582	31.1454	17.9198	39.9703	17.7388	11.7629	21.7463	8.08278	32.3694	26.9141	8.81724	17.7782	117.991	77.6361	138.378	95.4728	40.6267	92.0571	51.2917	74.321	89.4311	41.8731	40.5008	15.7064	27.1437	35.5906	31.4931	24.6064	58.3067	22.5429	29.2547	15.0955	24.3706	20.7902	32.2031
62.81629864_995.612676___5877	4.92938	77.6744	42.7952	17.8469	39.3405	45.5155	81.1088	50.0008	47.791	44.3924	45.4459	56.4148	473.565	67.7647	261.907	17.0043	60.8212	26.4275	62.0386	14.0239	43.5866	351.185	224.541	37.9592	158.135	339.706	70.4099	68.2467	39.6611	66.6133	55.1042	69.8392	78.5127	135.564	733.867	103.003
62.87953136_398.6063329__[M-H-CH4]- 79.9126_1	352.925	303.4	241.355	115.826	135.148	127.02	75.8665	62.1616	44.8313	44.6381	26.8962	44.2071	20.1776	31.2138	25.3398	4.83782	23.7063	22.5789	9.93018	16.2706	2.06053	4.58037	12.6727	25.2804	78.6564	387.153	151.669	86.4619	106.575	153.841	22.0665	32.3635	23.5601	20.5232	10.2207	22.2565
62.89437094_469.4589959___1384	19.5277	22.9494	38.7213	17.6936	17.6512	45.7797	15.5527	32.4055	28.1498	11.9791	19.0012	8.7109	35.3573	54.4994	75.9068	36.2373	36.6217	9.02878	9.93018	16.2714	16.4907	9.13567	5.06138	7.58438	33.872	29.8597	22.066	19.5759	16.21	27.5709	15.7516	2.86915	20.5778	3.41613	6.8028	19.0792
62.94157152_844.2354918___5783	57.2883	63.9559	110.251	0.0402612	4.44565	0.0319682	15.7109	7.31129	20.4222	12.1559	3.82609	8.83343	5.10526	7.91525	9.18592	12.2135	10.9303	0.0207037	12.0846	9.38648	10.3985	9.22748	10.191	10.2355	18.426	15.1309	12.4365	8.30664	13.769	11.2307	6.0844	14.5417	20.3411	13.3706	10.3277	6.41381
62.98190227_398.3473747__[M+Cl]- 28.0156_1	263.322	440.729	826.917	88.6348	245.968	243.653	93.3464	80.785	88.9018	34.4287	73.0039	26.6193	17.7	39.0602	20.5204	14.5303	12.9446	9.0435	7.95331	4.65402	8.26171	11.464	5.08112	12.6571	477.158	570.714	544.086	34.1076	59.6695	117.652	9.4678	22.997	29.4838	17.1259	27.2873	22.3047
62.97954972_782.5996635___8825	4.84602	9.22466	15.452	8.78738	17.7657	17.461	23.2351	14.4403	20.1514	12.0032	7.52904	13.0629	15.5025	24.0485	11.6002	9.88753	8.87877	9.29689	16.3632	9.53602	6.34995	48.2592	94.2463	53.5716	39.6794	27.3658	27.9713	33.0868	13.9355	33.963	43.3015	56.9271	49.409	138.922	58.2908	85.8037
63.00354186_1114.026426___5245	9.87993	77.757	23.3605	13.4132	48.1591	31.476	27.0949	14.5014	36.3736	44.5078	30.3216	21.7304	22.8581	199.106	79.0527	127.682	68.6886	40.6274	103.971	32.7458	64.5103	117.662	78.997	27.8113	59.6775	48.2587	54.2012	39.519	35.5455	52.7575	19.33	23.4021	47.5965	38.2928	45.0543	45.0882
63.01278279_994.1902093___5860	24.3103	82.1525	19.1607	13.203	26.1978	52.3921	75.1385	53.4465	23.8671	23.8566	41.5632	13.0038	484.77	59.8651	305.54	34.0115	52.0637	29.2705	46.8955	4.66923	62.489	411.269	228.264	56.2062	127.079	298.965	41.6683	62.4224	57.2728	78.6508	32.4002	48.7916	86.9614	90.9755	44.2445	86.7825
63.07687354_398.8048529__[M-H-CH4]- 80.1133_1	856.416	690.297	738.862	208.171	141.756	202.256	71.4279	73.3186	82.3555	40.0777	81.8879	31.0559	27.8143	31.2482	25.0804	12.1237	21.5743	18.087	7.96302	6.98103	2.06543	6.88521	27.9462	25.3141	473.41	596.812	431.788	93.911	101.763	116.14	37.8712	45.1646	44.2257	37.7251	23.8764	35.0503
63.19545747_1113.245655___5286	14.8199	32.0176	38.9341	22.0671	48.1591	38.4707	54.1166	39.8788	28.2906	16.1846	26.5314	21.7304	35.5571	196.067	89.8012	109.417	79.9011	47.3986	53.9861	87.3515	79.972	106.689	73.6531	80.2111	63.6793	51.2749	47.8246	39.519	61.7204	86.0781	48.3251	20.4768	41.6469	17.4058	55.4514	65.3284
63.2042872_1053.970859___3340	29.1695	104.947	99.6374	17.5888	83.1153	73.3835	50.2014	78.4273	59.7045	95.5268	121.058	43.4359	73.8132	151.995	81.739	63.9307	71.8871	54.8796	102.504	23.6788	36.9225	111.473	135.534	89.7595	105.589	415.276	69.9528	70.7767	58.3902	67.2265	57.7599	112.325	77.2842	79.6019	48.0124	105.654
63.27415181_399.1822238__[M-H]- 64.2798_1	317.37	282.65	358.714	50.4748	86.0403	82.0672	55.2416	44.0339	61.3539	24.3907	46.1933	48.8021	17.7214	31.2482	34.2006	16.361	12.9446	11.3044	3.97652	20.9702	22.6917	11.4613	25.3748	20.2513	184.524	245.484	199.074	73.1362	48.8205	83.6346	9.48117	47.1777	38.3755	27.4364	30.7425	12.7456
63.27397213_423.3714513___13	172.403	125.564	172.027	62.0266	143.208	89.7829	74.8505	90.9385	40.2564	36.5919	19.2463	35.3798	30.7657	39.0517	41.1318	13.9083	24.0647	22.6186	5.95989	13.9658	28.8853	9.1629	22.8009	20.2672	21.8894	72.7796	48.1993	19.9119	27.5009	61.548	9.60034	11.6392	8.9585	13.8723	24.2077	21.0914
63.39400748_1113.232455___5287	24.3818	41.1757	30.704	17.6295	21.8905	34.9734	27.0583	28.5907	31.8833	39.8869	49.2726	21.7305	20.3177	221.474	94.0356	139.445	83.4594	79.8164	81.5163	63.9035	75.5003	68.7852	45.7222	48.5964	43.3436	69.3775	34.8222	47.9949	32.8059	44.4307	34.943	23.1025	44.5661	20.6228	30.754	93.245
63.40187342_1054.563814___3277	9.70258	130.132	76.5647	26.3559	117.8	111.577	73.1944	71.2261	59.5761	91.4318	103.901	39.0054	93.4639	89.5488	119.892	73.6422	83.5253	29.6769	97.9305	18.8814	73.0336	107.974	166.472	46.0178	68.0085	483.691	38.1154	56.5027	41.6383	75.9913	25.6419	104.735	59.3911	124.644	58.1061	173.041
63.46239038_425.0698873__[3M-H]- 21.4927_13	68.3179	68.9054	59.597	35.4572	61.6367	87.8035	59.9687	39.6649	44.3308	32.0225	22.8114	30.5704	22.7981	28.6249	32.7075	14.7457	15.1207	18.1184	0.0182778	9.45705	12.574	13.9571	5.14266	12.8491	37.0722	26.9569	37.8809	79.8547	44.0954	83.6196	15.8008	31.6208	23.5856	17.1227	13.6648	19.1622
63.58662276_1113.823146___5288	14.7928	37.0499	46.1362	17.8511	17.732	28.3309	19.6048	43.4132	32.2722	60.5675	30.7589	35.2023	27.9036	136.832	88.1401	132.786	62.7668	43.7137	97.3795	67.5342	89.4901	64.9197	88.542	59.8023	93.0629	33.1371	29.0627	40.0128	40.9641	33.2803	25.7196	35.0357	30.1332	24.3242	38.0504	41.8156
63.59513738_1052.63615___3279	29.0794	216.223	95.6117	21.9423	127.979	74.0481	83.9974	67.6	72.2055	83.4028	83.953	30.6779	140.475	126.607	85.331	52.4559	52.5459	29.5827	58.5255	42.4195	54.4391	186.583	291.063	66.3744	89.7429	335.499	72.9858	77.0626	60.8815	58.9169	57.5707	74.7261	68.2177	72.4585	88.8789	91.263
63.77460714_1113.474368___5272	19.7599	140.505	103.699	13.4132	35.0248	48.9627	42.0632	90.7666	122.447	52.6001	37.902	34.7686	33.0173	111.103	59.3845	84.5451	77.7351	55.5756	80.903	71.3385	62.6554	67.8234	85.0154	88.3432	40.832	30.1617	31.8335	28.2278	30.077	58.311	35.4384	29.2526	44.5661	59.1799	34.6572	51.468
63.78461275_1048.269332___5706	14.739	68.3134	77.46	17.7726	82.9149	73.2249	100.18	79.2339	68.2818	72.3802	75.4984	34.6714	155.736	167.723	59.2132	85.4411	64.8807	62.9943	166.786	32.6253	66.1898	190.844	246.971	98.456	122.781	198.059	70.6704	93.1558	35.5693	85.9363	48.6407	55.3985	80.5296	66.46	65.7912	83.7411
63.97136215_1115.285918___5213	24.6488	78.5984	81.4731	31.2394	106.388	70.8277	90.0167	51.8711	72.489	88.6846	65.2447	57.1063	58.2789	121.244	92.1842	77.8526	75.1721	63.0501	74.287	51.3313	70.7992	70.3317	86.6957	98.2585	50.0789	75.2269	70.9156	34.2379	47.4528	66.6988	41.7239	37.9596	57.1469	69.3826	72.5179	77.1011
63.97671064_1045.004434___5646	9.78708	136.266	96.5928	22.1589	117.506	62.5947	69.1512	61.0733	63.3711	60.1613	90.3572	77.7975	102.161	132.279	59.7889	46.3723	68.963	61.2748	168.776	25.8554	60.6296	170.699	292.49	53.4754	56.1993	128.041	50.7311	73.1802	66.2149	81.0675	67.8175	63.8738	65.1459	72.9653	72.4163	110.44
64.02049703_1096.279509___24	5267.81	3712.22	4773.76	2578.02	2781.39	4755.13	2483.94	4027.88	2438.9	4203.44	3630.93	5468.03	40.8285	60.2551	80.3707	68.3312	41.4331	80.5871	46.2191	30.5267	48.215	55.3453	102.098	56.0108	2817.16	2058.55	3345.02	2077.98	2715.38	1782.54	2555.16	1219.83	2943.55	1872.66	2535.02	2142.62
64.0322429_450.9134441___2823	24.4155	23.0254	23.2397	609.284	873.603	581.498	459.692	599.946	695.289	101.672	105.488	39.2094	5.07256	5.20658	11.4108	9.69457	10.7971	4.53144	0.0182778	4.6694	4.13323	13.7652	7.62399	15.2108	15.4785	14.9822	9.4943	14.0387	10.8406	13.8222	6.32929	5.76308	2.95157	13.7115	0.0313307	6.39135
64.16380739_1114.064578___5242	29.5857	45.7394	54.4061	22.3553	53.1959	56.6618	58.7066	36.1777	52.5397	60.6924	34.5409	34.7686	47.8196	166.995	115.672	124.469	82.1418	116.27	105.442	46.7206	118.526	69.5906	137.125	133.32	53.2981	36.1941	32.2919	51.445	57.3498	52.6938	22.5517	35.0357	43.8778	48.6484	44.9686	65.3092
64.14162854_398.4308359__[M-H-CH4]- 81.174_1	706.127	371.445	421.389	44.3881	88.2089	77.3828	42.7888	40.3665	36.8116	28.0222	37.9442	34.9898	22.7506	23.4359	18.2357	16.9734	17.2602	20.3487	5.96498	18.6391	12.3771	13.7568	25.3737	25.3081	368.866	400.833	396.827	50.6064	29.8268	75.6255	15.7809	17.2696	11.7943	27.4014	13.6448	25.4918
64.18637653_1047.525219___5681	4.92052	86.6182	88.1798	17.593	78.6331	90.7745	53.9999	87.6387	63.6154	35.8232	26.4515	56.4031	27.8588	147.06	47.9283	43.601	49.8183	18.002	55.9287	32.6598	43.5472	127.486	163.523	42.9607	86.8888	90.4461	57.2364	59.347	38.3482	66.5701	38.5149	70.8892	68.3127	70.0637	68.5358	83.8269
64.22744672_450.8752808___2824	29.2986	32.2356	11.6199	516.394	736.501	603.002	433.487	748.19	594.317	142.914	107.637	77.3407	12.6814	2.60329	9.12861	7.27093	6.47829	2.26572	1.99371	4.6694	10.3331	2.29421	5.08266	2.53514	9.28707	14.9822	12.6591	11.231	5.42031	0.0253439	6.32929	8.64463	2.95157	27.4229	6.84028	9.60018
64.3544815_1115.016111___5210	14.7893	50.9441	42.7472	22.3545	53.1941	31.8725	43.0515	32.5593	12.1242	43.7783	26.8655	22.0022	48.1964	150.094	120.255	142.114	99.7352	87.3802	143.911	44.2974	106.837	75.476	106.163	132.403	28.2199	51.2715	67.6922	31.4345	38.2283	66.5398	51.5266	40.8796	24.0618	24.3265	51.8794	57.8465
64.38420598_1047.858564___5682	58.7958	78.1942	73.3979	26.5906	83.7372	87.9244	101.043	82.6285	40.0583	76.1895	79.9511	61.2745	48.0203	154.916	88.9892	53.7615	48.024	47.2543	61.7485	35.2574	58.4656	71.4135	142.847	35.2516	84.4112	103.856	35.2865	39.864	60.0335	89.629	86.4956	81.4004	62.8407	64.3404	55.2499	57.8271
64.42335726_450.8752808___2825	43.8903	27.6305	46.4795	208.967	401.513	327.251	309.071	332.082	386.178	49.2783	67.2822	80.0155	2.53628	10.4132	2.28215	2.42364	10.7971	4.52547	1.991	0.0213417	6.19173	6.87333	5.07566	7.59559	15.4581	23.9715	22.123	28.0775	5.42031	19.3511	3.16464	34.5296	5.89453	20.5386	13.6806	9.58703
64.46785389_484.0869398___6521	29.2843	32.2428	42.4799	17.7622	26.4875	28.0921	15.5732	18.1187	20.2295	92.7188	53.102	78.5096	15.2058	18.22	18.2655	2.41818	6.48391	9.02847	15.8974	11.6293	12.3737	6.85879	12.6613	7.60026	21.6256	23.9718	9.46724	2.80536	8.14341	22.1296	12.6046	11.4732	26.5032	20.5332	10.2133	22.3369
64.55355607_1113.704569___5248	34.4509	91.3835	38.862	35.7021	44.2452	42.426	50.8791	41.9795	44.3858	88.8287	30.6518	26.0439	25.3378	339.071	185.283	226.047	141.702	143.287	170.833	93.0016	127.531	98.8779	174.442	145.923	56.4272	51.2158	84.8128	54.8681	49.1492	86.3992	48.2451	59.6387	48.4707	52.0451	55.3572	114.916
64.62069491_450.9999999___2826	24.4155	4.60508	15.4932	173.619	236.239	112.771	108.936	191.524	148.043	48.1944	53.2371	26.2552	5.0794	13.0338	11.4108	12.1182	8.64918	4.52547	1.991	2.3347	8.25565	13.7652	10.1513	17.7231	9.27486	27.0031	15.8021	16.8465	13.5717	11.0727	0.0290452	8.64463	20.661	10.2836	3.42014	9.60018
64.63012475_419.5220305__[M-H+HCOOH]- 19.6417_6	112.973	171.795	230.558	84.8356	62.0675	70.7829	70.4932	54.4797	68.9634	28.2234	41.5902	39.6214	35.2669	28.4916	27.2628	16.872	10.745	20.2506	13.8462	47.0643	24.6573	36.4973	30.2841	42.8414	39.9208	82.6088	53.3593	22.358	40.5287	54.9724	31.4345	45.7457	17.6056	44.328	27.1767	38.1064
64.66536246_484.0987553___6522	4.87399	18.3999	27.0646	26.6073	13.2256	17.5739	15.5939	14.4764	8.08136	67.9217	43.3725	59.7526	2.53099	12.9979	11.4019	4.84277	10.7896	9.02798	7.94846	6.98704	0.0189364	4.57963	10.1262	7.58965	6.17084	17.9556	18.9324	2.80925	16.2611	13.8125	0.0290452	11.474	5.88829	10.2809	10.2292	3.19098
64.74671431_1113.812712___5289	29.5787	41.1226	38.862	26.7766	86.8757	48.9039	7.82755	39.8043	32.2805	56.543	26.8651	30.3845	17.7563	288.509	201.481	220.878	99.4493	186.442	172.273	101.189	127.107	95.422	120.412	165.083	43.8878	30.127	61.2308	53.5728	68.2627	65.3511	173.539	78.8441	48.1295	34.7545	79.5759	127.545
64.81620052_451.8979628___2627	19.4909	45.9363	57.9659	62.6118	96.0298	75.7587	83.3106	110.869	125.206	32.0377	42.9854	26.1877	5.06568	13.0016	13.6783	9.6569	4.31385	9.03977	0.0182778	6.98523	8.23485	15.9997	7.59329	10.1131	24.6979	38.9033	12.6107	2.79687	10.8256	30.3707	15.7609	25.8346	8.8198	20.4838	17.0558	12.7628
64.82474193_368.9906318___666	4.89387	4.61068	23.2518	22.22	17.6745	17.6212	11.6958	14.4915	16.1378	4.02704	11.4126	26.3015	20.33	2.61214	11.4513	4.84988	2.16637	4.54127	3.98097	7.00627	10.3419	4.58907	7.63327	10.1617	6.20242	24.0664	12.7061	25.3943	21.6835	47.1858	12.6966	17.3338	8.89124	27.453	10.2946	9.62484
64.84370806_418.6254408__[M+Cl]- 29.8757_6	58.4897	50.4702	77.3087	22.1189	50.0608	90.4802	19.4359	14.418	32.2083	56.029	26.575	8.72651	66.9471	81.6318	78.1416	33.8821	34.4823	22.5643	47.9705	27.9297	43.3272	43.5228	38.2752	32.8599	18.4791	77.6913	34.6599	19.6445	24.389	44.156	18.9352	34.4487	23.57	34.2445	17.0503	31.8912
64.85759423_475.341862___452	44.6283	23.0339	51.1611	35.9648	22.0977	10.5741	11.6978	29.3751	16.4022	60.0596	53.2932	57.6251	56.3023	23.3948	34.6695	4.84515	2.1592	9.03201	3.97526	6.98915	4.12638	2.28951	10.1346	2.53067	9.25255	32.9222	28.4005	25.2706	10.8343	19.3334	6.30576	5.74096	8.8307	27.3764	13.641	12.7524
64.88528779_501.2716451___3	841.002	467.359	825.207	97.1284	70.1026	148.867	3.88698	10.87	4.03671	7.99122	7.57414	0.0396846	2.53289	20.8232	11.4173	2.42018	4.32063	2.2605	5.95592	2.35735	8.24942	2.28785	2.53117	2.52732	15.4404	8.98637	6.31464	11.2167	2.71104	8.30101	3.14889	8.61776	8.82261	6.83912	3.40508	6.38133
64.95306687_1114.024725___5218	69.0332	101.734	96.9886	31.2394	57.6289	38.955	43.0515	39.7275	28.1971	56.4356	38.3787	35.1425	20.2702	225.172	186.956	324.123	147.922	130.413	178.596	116.009	116.144	104.957	96.0897	178.704	84.5231	76.4114	70.8988	74.1924	51.822	58.1802	37.8307	23.3571	48.1295	55.5148	58.7138	119.673
65.0163495_1095.058696___24	18127.8	10808.4	16063.4	10373.4	14600.4	15889.6	9748.92	13954.7	16446.9	15406.5	12942	13605.5	271.324	329.158	305.214	456.509	222.296	309.659	203.729	304.881	280.739	141.854	406.65	391.947	3939.44	8074.46	6323.32	4473.35	9525.08	10293.5	7887.19	7072.13	5756.11	8503.4	6365.32	6599.06
65.03578811_418.4653026___6	43.8672	59.6465	114.279	30.9665	43.992	52.6742	44.9935	39.6496	20.1302	12.0031	22.7786	43.6325	35.4075	69.7421	68.5091	33.8821	12.9454	18.0714	11.9174	34.9121	33.0112	22.9067	48.1586	56.5943	30.8382	139.786	25.2072	32.4832	29.8427	60.6443	25.2469	40.1902	40.0122	47.9424	37.5107	25.483
65.05842506_475.8002166___453	19.7941	32.604	11.7781	13.4624	17.9065	17.8493	31.5982	10.9757	12.2574	40.5652	49.5104	30.9644	35.393	34.0952	44.5129	4.83201	15.0923	2.25523	0.0182778	4.65302	6.18155	2.28377	5.05979	2.52753	15.6158	29.5391	9.46684	5.60812	5.40943	30.3444	12.6115	11.4819	5.88713	27.3764	3.4057	22.2849
65.08256199_501.4623814__[M+Cl]- 30.115_3	728.541	526.184	677.818	150.885	69.4577	126.87	38.8698	18.1167	8.07342	0.0365366	7.57414	0.0396846	10.1316	10.4116	4.56693	2.42018	8.64126	11.2862	9.92654	2.35735	6.18707	0.0210019	7.59351	2.52732	9.26421	17.9727	3.15732	2.80419	8.13313	11.068	6.29032	5.73844	2.94462	6.83912	3.40508	3.19066
65.14446702_1114.262499___5240	39.4475	134.896	159.187	40.2395	62.0619	56.6618	47.0516	54.2666	44.3742	109.401	11.5346	30.802	30.4403	207.728	119.364	208.365	130.361	51.8494	115.256	100.644	85.7852	89.7544	116.653	180.574	53.2981	74.6993	90.2029	22.242	57.3498	87.9881	57.8691	72.7853	39.1731	63.8027	44.9686	220.32
65.1528235_1052.516921___3268	29.3555	114.847	175.592	70.8937	114.423	77.4715	108.818	114.937	90.1366	112.259	125.615	118.022	99.354	146.382	89.1158	70.7851	45.8604	34.0466	113.569	37.6086	64.7419	69.2469	61.3413	129.798	71.8581	91.152	86.5057	94.1294	88.3052	102.054	159.186	75.5084	125.432	115.11	91.232	102.366
65.21483454_368.273295___667	9.77332	23.013	3.8696	13.3121	13.2365	17.6212	7.79723	3.61739	20.1428	12.0811	19.021	8.75384	12.6876	7.82526	25.1544	12.1247	8.65303	6.80171	3.98097	9.32794	12.3924	4.58907	5.08162	5.07363	40.2578	30.0394	28.5449	16.9039	8.15703	24.9439	15.8264	25.9624	11.8213	20.5898	27.4112	22.4261
65.22552171_475.6455522___2	358.079	135.843	322.895	22.1869	73.2725	57.9198	7.79851	18.3594	24.6032	12.0119	7.61332	13.1037	54.6423	12.9971	54.7314	9.67688	12.9552	9.04652	7.95052	6.97995	10.3301	13.7371	2.53709	7.592	736.256	1265.75	729.802	120.145	159.383	296.261	15.786	63.2566	43.8152	37.6922	20.436	15.9405
65.24412269_415.6389069___6	61.8414	59.5192	88.8154	30.9422	17.5793	35.0764	34.9427	25.1808	32.1442	27.9635	26.5396	0.0396846	20.4756	31.6258	32.3204	22.0459	26.2006	16.0064	52.3403	37.6281	83.4488	65.2229	90.6011	30.7492	21.5608	75.6621	22.0266	28.3594	24.7108	61.0941	25.5114	34.8157	23.8213	44.468	51.6905	54.9078
65.27442223_501.2721496___3	264.574	196.701	272.549	93.1552	62.7165	96.9241	3.88698	0.0328174	4.03196	3.99561	3.78707	0.0396846	5.06579	7.80871	4.56693	9.80679	4.32063	2.29	11.9118	2.35735	10.4623	2.31776	5.12892	0.0232341	6.16867	23.9637	12.6293	22.4335	18.9773	2.767	0.0290452	20.1081	2.94447	0.0314148	6.81015	0.0293344
65.32549703_424.6946802__[M+Cl]- 30.3559_13	112.418	132.186	134.851	26.6258	26.4581	38.7236	15.5842	10.8367	12.091	8.02731	3.80689	8.74666	7.72187	2.6459	4.64485	9.85042	6.5885	6.89683	6.06376	7.10694	4.19975	2.33087	5.1551	5.15	18.5599	21.3092	18.9659	5.626	19.3239	16.8516	12.6569	17.2699	20.6653	17.1453	3.42064	3.24564
65.34464652_1113.974262___5290	44.3785	78.7311	66.0646	40.2395	57.6289	56.4497	58.8145	57.8843	24.2041	72.681	23.0692	30.802	32.977	277.019	110.824	233.982	101.11	36.0692	118.715	51.3927	122.818	97.3918	206.88	105.412	53.2981	69.2866	35.5211	45.7289	57.3498	55.4671	35.4384	43.7946	48.2131	31.274	27.673	45.0322
65.42589027_476.2615562___2	586.42	227.872	709.994	62.9516	76.1028	62.3685	31.5982	21.7099	24.2441	8.11305	26.9889	8.84696	71.7423	31.1494	83.1195	9.67677	6.47569	4.51047	1.98517	2.32651	6.18155	9.14605	5.0673	2.52753	1633.66	2257.13	1084.94	281.879	334.981	658.746	44.1859	84.7957	70.3133	27.3764	30.6513	9.56435
65.53727971_1115.310984___5291	9.85953	69.4692	42.7472	26.7321	48.7612	28.3311	50.879	32.5593	56.3803	52.4175	26.8655	30.8031	15.2032	165.902	113.488	133.96	85.5198	60.9404	80.5664	61.3485	110.356	68.6264	81.9638	105.239	71.7084	54.1633	28.9623	42.8652	66.2838	47.0838	54.5621	35.0396	54.0472	38.2274	58.7967	54.6133
65.61326352_417.4336795___6	196.181	152.186	186.511	53.0856	83.5883	66.7209	42.7622	54.0772	40.2617	28.0416	15.1886	26.1805	22.7879	41.6413	38.7787	12.1011	12.9456	18.0721	9.92913	37.239	25.76	21.4212	40.5579	32.8978	118.604	213.92	118.641	39.2904	48.8337	38.6441	51.1321	60.2859	26.5166	20.5463	40.9165	35.0858
65.62235916_475.612313___2	245.285	105.137	353.615	26.9736	39.7759	69.6811	19.4963	18.3594	24.6032	16.0159	19.0333	13.2727	37.9666	23.3948	36.4876	4.84515	10.796	4.516	5.96289	9.30659	8.25276	6.86854	7.60095	15.184	490.692	571.458	258.763	122.466	118.501	175.675	31.572	21.1867	14.7178	13.7062	13.624	25.5048
65.73593656_1114.057291___5220	34.5166	83.3623	58.2923	4.46278	48.7629	67.2859	27.3964	47.031	32.2722	32.3027	76.7575	26.4017	17.7569	209.631	164.902	128.757	82.4776	77.6365	93.7275	88.5947	169.105	77.5789	104.887	92.2666	53.2981	54.2243	35.5211	40.0128	49.157	108.963	54.6541	32.116	30.1332	41.6986	69.1825	64.3317
65.81091581_416.2909372___6	214.246	173.64	224.47	75.0035	81.0311	109.075	61.9957	43.1314	56.1981	47.846	56.7558	47.8496	45.868	44.5947	41.3771	34.1914	6.52085	31.878	14.0116	16.4385	31.1774	25.4266	35.8134	33.1561	133.849	250.188	193.104	56.6374	41.0063	47.2592	25.4743	40.5626	41.6275	27.6448	34.411	28.9597
65.82267237_475.6019177___454	19.5865	27.6407	76.2467	8.88974	8.8391	45.821	3.89926	11.0157	0.0365954	12.0119	11.42	8.74793	10.1378	2.59942	4.56791	7.26772	4.31841	9.04652	0.0182778	2.32972	8.26412	9.15805	5.07417	7.60266	106.536	196.904	77.3766	38.7724	24.3771	65.1793	28.4148	8.6259	14.7375	6.85312	13.641	9.5643
65.90560513_418.7166698___6	209.421	119.156	200.124	35.3903	35.1553	52.6168	34.9454	18.0043	20.1072	15.9869	15.168	13.0898	10.1035	10.3913	9.12401	7.25201	10.7757	11.2946	1.98364	6.97449	10.3038	9.15067	10.128	7.5917	24.6432	23.905	25.1799	19.6222	5.41977	22.0525	6.30467	11.4705	8.8287	13.6819	3.40603	15.9269
65.93327179_1114.285983___5292	69.0332	69.8163	73.0304	58.0161	35.4639	46.0377	35.2887	43.4132	32.2722	68.6432	38.3787	39.6025	43.1238	236.293	130.479	86.3406	102.791	72.1384	102.902	98.3849	115.736	76.1284	107.558	70.7595	37.6222	84.3489	54.8963	45.7289	54.6188	79.074	32.1495	46.5527	51.2264	38.2238	44.9687	32.1659
66.01040048_1091.927978___24	4124.93	8472.31	4889.95	4131.53	5697.94	4371.65	7110.26	6100.7	6042.55	3805.98	6317.25	6801.94	195.115	262.724	254.259	267.958	194.997	208.542	203.97	173.108	158.139	281.06	270.53	276.055	1337.38	3315.3	1691.92	1404.85	1959.25	2636.32	3580.61	2804.93	2675.75	2763.16	3253.71	2820.64
66.00875838_420.6765447___6	189.805	278.146	204.8	132.802	237.515	239.056	145.769	164.6	130.67	125.783	119.326	66.4654	63.2217	114.563	82.1476	72.6897	79.8487	63.2433	53.6366	48.8785	47.4538	81.2377	59.6104	73.3799	123.342	195.195	136.229	70.1534	75.9565	55.2021	34.7249	60.2063	64.8084	44.4837	40.935	47.8339
66.13333999_1114.018086___5250	24.6547	36.5915	86.4749	22.3553	88.6599	46.0377	31.3102	36.1777	44.4566	64.7386	46.0545	21.7304	60.0886	169.549	77.4071	120.954	87.3749	61.5651	100.799	99.3177	90.3053	52.8433	127.16	54.3346	105.982	77.6441	45.2087	51.445	38.2798	99.8408	45.1034	58.3928	42.1865	48.6484	44.9686	61.1912
66.20263794_422.9321516___13	177.947	117.705	202.461	71.6498	57.9586	98.4919	43.3356	65.3806	36.6607	28.3552	42.3427	26.4907	27.7873	25.9722	31.9099	21.7537	30.1776	22.5621	21.828	9.29993	8.24354	6.8644	12.654	25.2755	43.5187	63.8693	41.4635	22.719	10.8386	38.5968	22.363	29.05	17.8874	24.237	13.8118	22.2983
66.21437094_401.3656258__[M+Cl]- 31.2414_1	29.1181	36.5597	100.013	44.1201	39.45	52.469	46.436	50.3521	44.1244	47.824	45.3216	21.7419	43.2939	43.0497	59.3262	26.8743	21.7381	11.3862	12.0172	25.7927	10.3945	6.94114	20.4487	25.5057	65.23	133.399	53.994	54.4498	42.342	75.032	38.1641	55.0017	21.3287	24.1848	20.6165	28.8956
66.3344058_1113.844233___71	34.5166	59.3993	38.862	31.2394	53.1959	38.955	46.9653	39.7275	28.2455	56.543	46.0545	21.7032	35.4729	149.241	74.2123	100.687	43.4107	65.1504	73.9536	121.724	77.4553	61.8744	66.5598	35.3962	50.0735	42.1777	70.8988	50.7532	62.8017	52.6979	25.7307	46.7142	45.1214	48.5754	31.1384	61.1182
66.38456952_473.9350371__[M+Cl]- 31.4132 [M-H]- 67.3904_2	19.5621	23.036	24.2854	17.7314	22.1025	10.5774	35.0894	25.3153	8.07738	16.0133	11.423	4.36238	10.1231	5.19902	9.12459	12.0963	4.3186	9.04719	3.98096	4.65378	8.26263	6.86022	5.07443	7.59105	85.2773	76.1539	91.1423	11.2147	27.0838	28.9446	22.0735	11.4872	2.94331	10.265	13.6252	6.37626
66.40705944_422.6744797___13	127.796	65.1051	133.609	53.835	89.0211	88.8507	82.5936	65.7574	77.5288	40.575	38.4276	17.691	40.4179	25.9722	34.1892	19.3597	23.711	18.0497	5.95308	13.9496	18.548	4.58038	20.2464	27.8031	40.6162	57.325	44.1159	30.8675	18.9675	22.0553	18.9159	17.2212	41.1944	34.2182	17.0377	25.4838
66.53555928_1114.070017___5213	24.6547	50.9437	54.4061	13.4132	84.2269	24.7895	39.2097	25.3244	48.4083	68.6432	23.0272	30.802	25.367	88.6629	79.2622	74.6524	80.6895	27.1828	67.6521	31.1613	60.0662	32.5402	81.732	25.283	47.0277	51.2119	25.8335	22.873	62.8117	38.827	28.995	26.2768	33.1465	38.2238	48.4278	73.9815
66.60492542_400.0855706__[M+Cl]- 31.6374 [M-2H+Na]- 45.632_1	59.068	51.0044	58.5175	71.7657	75.6463	60.3427	35.3405	51.1047	56.9692	52.5714	45.9761	44.134	38.3106	26.3091	34.5647	26.9167	30.5214	15.9924	24.1128	25.8659	20.8458	16.2173	25.6408	25.5816	105.535	107.27	117.498	86.5811	54.8184	100.096	22.326	40.6605	26.8126	34.6066	20.677	25.7576
66.7975294_399.4999559___1	93.6651	46.4389	42.9128	58.2078	93.5966	70.9907	51.1151	40.218	57.0586	80.9014	57.5434	73.6172	63.7982	31.571	52.9991	21.7699	23.9811	43.4078	18.0846	25.5692	18.7612	16.2173	15.3845	23.0235	71.8869	132.648	112.249	62.5159	43.8547	77.3464	44.6471	26.1356	23.8343	31.1459	17.2323	19.3192
66.79396985_433.8899746___1201	83.7102	64.9066	78.033	93.6302	84.428	67.4212	62.8189	58.1738	121.325	48.5672	57.5379	44.0661	23.0277	13.123	9.2165	12.2051	17.4444	2.2835	8.03155	16.4494	10.4201	6.92962	12.7927	12.7816	6.23957	18.143	15.9116	25.4652	10.9546	2.78945	31.8496	28.9812	17.8261	17.2586	13.7801	16.122
66.88439313_675.2390743___1298	29.1388	29.3688	50.2556	4.40395	0.0400679	10.5056	3.88022	10.8359	4.03533	0.0365366	11.3503	8.71069	12.769	5.30049	2.32377	7.36349	4.38735	4.5739	4.03291	4.71437	6.25505	9.25674	7.66821	5.13249	57.6091	73.4979	94.7295	16.7789	13.6914	8.3494	6.35646	5.75234	8.87442	6.83363	6.80782	3.22224
66.92490653_1115.468106___5221	14.7893	23.1564	34.975	44.6278	22.1642	28.3311	42.9789	28.9416	12.1018	28.2716	30.7034	22.0022	30.4398	75.454	65.6966	53.2503	43.3625	45.5281	80.4892	42.0466	73.3312	45.8838	38.0636	47.9861	47.0331	48.1965	16.1166	22.8615	32.7671	44.3599	19.2872	23.3597	48.1189	31.277	27.669	51.455
67.01959001_636.0221193___1945	14.5919	36.6029	34.6991	21.9979	13.1826	17.5086	15.5187	0.0328174	8.0364	16.0221	11.3519	13.0462	5.09675	15.8044	6.92789	12.2053	0.0198348	4.5613	10.0543	2.34962	4.15825	6.91194	0.0232272	17.8711	98.9933	129.005	69.6405	17.0037	10.9441	11.1189	22.3779	14.4643	8.9446	20.7147	17.1501	6.45743
66.99109413_424.734573___13	194.536	145.773	244.956	76.0381	111.103	56.7648	78.5357	58.2407	56.2899	48.538	34.5305	52.8934	35.8173	21.0155	48.4306	22.0071	26.1621	27.3906	10.038	25.8734	18.7645	13.8881	17.9138	15.3423	18.7035	54.4071	35.0395	34.0242	24.6709	36.252	12.7568	34.7601	26.7447	34.5623	24.1333	16.112
67.02062125_367.0959676___668	34.4759	60.1973	31.2004	58.1523	53.3585	56.7546	54.9389	43.6913	60.9132	48.5947	45.9412	66.1682	38.3645	44.6208	36.8308	45.8565	30.4751	15.9708	10.0165	20.8929	20.7896	32.3273	30.6866	12.7662	262.884	279.24	299.629	45.4259	35.5794	41.8888	41.5257	29.075	47.7216	31.1266	37.9848	29.0579
67.01800584_127.8561916___8062	4.89534	9.20618	15.5029	119.08	92.5541	132.438	196.116	124.733	148.105	138.575	162.626	308.957	0.0232039	0.0238966	125.354	349.943	176.675	294.771	124.545	183.026	0.0189364	263.31	52.6495	0.0232341	12.2715	0.0274813	9.40448	67.9737	101.278	174.071	119.098	170.575	179.321	102.027	61.0747	0.0293344
67.07610022_675.5259321___10	43.7082	18.2814	42.524	0.0402612	8.79771	3.50225	3.88063	0.0328174	4.03343	8.02026	11.3368	4.35534	10.2152	5.30661	9.29507	2.48586	6.58103	9.1595	6.04936	2.38776	2.08764	0.0210019	10.2243	10.265	61.8438	117.237	83.3045	13.9673	2.73828	11.1325	9.53468	5.75234	5.91628	10.2428	10.2117	6.44448
67.20615408_400.1284076___1	78.8758	61.2689	93.9255	71.7657	84.6826	56.8797	47.1831	84.0922	32.6049	60.7657	34.526	66.3023	67.4843	60.5803	53.8005	21.7699	30.567	11.4403	18.0846	25.5692	20.8458	23.1676	20.5127	28.1398	71.6274	97.0596	76.7334	50.9035	47.5284	66.9649	22.3618	26.1806	23.8709	41.5279	31.072	29.0223
67.19383951_332.1212942___3706	14.6228	4.5898	3.8612	26.6125	26.3893	31.6036	15.5431	21.9643	28.5362	8.02637	11.3783	8.74321	15.1754	12.2014	25.9878	0.0221872	6.47007	4.52736	5.95833	16.2931	14.4215	0.0210019	0.0232272	7.59719	9.26623	14.9715	6.32316	16.8494	10.8463	30.3911	18.9962	23.0441	8.85178	27.4387	0.0313307	9.57645
67.32002418_1115.180089___5293	39.4381	55.5753	50.6223	17.8836	31.0299	42.4966	50.879	36.177	32.3311	48.554	49.893	44.0044	45.6598	104.652	64.5965	80.1216	56.4472	47.4338	77.2554	42.0466	64.6796	71.4385	81.0068	59.7381	47.0331	45.2395	41.9797	31.4345	49.1507	55.4498	32.2041	23.3597	51.2209	55.6035	31.1277	70.8469
67.40394648_332.0622753___3707	0.044486	4.58465	30.8531	13.2902	43.9335	7.01484	11.6442	10.9636	20.3485	12.0252	3.78838	4.36619	25.2649	7.80217	11.3794	2.42041	6.46339	2.26123	1.98403	11.6251	4.11605	6.866	0.0232272	2.52926	6.17051	11.9629	6.32316	11.2201	8.12345	19.3173	6.32497	8.63152	2.94715	13.7019	3.41078	6.37693
67.51930627_1116.15566___5294	14.588	51.0382	34.4986	39.6666	57.627	28.3326	38.6545	35.6827	43.8231	43.8762	30.3229	44.0858	38.0474	101.981	73.1717	85.8425	73.7303	38.3294	63.314	51.3896	45.6449	70.2946	97.5865	53.0926	49.4763	54.2867	50.9338	45.793	43.7506	41.6342	34.9143	28.7912	17.8194	44.5563	47.8351	54.7342
67.60627637_501.5914548__[M-H]- 68.6106_3	181.141	113.633	213.692	8.84277	17.5674	10.4951	11.6439	18.0674	8.05207	15.9613	3.78153	4.3471	5.06579	7.80871	11.4173	12.2358	4.3153	9.02897	5.95592	7.05885	6.18707	9.25181	10.2391	5.05463	12.3373	8.98637	3.15358	5.60117	10.8303	13.835	3.14516	11.4769	5.88174	6.83056	10.2028	6.37336
67.71296994_1115.351721___5295	9.85953	60.2066	42.7472	8.92557	48.7612	31.8725	43.0515	21.7062	24.2035	24.2328	30.7034	17.6018	15.2199	93.6731	102.17	83.0126	77.4234	33.8141	55.3506	53.6231	59.1568	71.5489	75.9788	76.6123	53.3042	42.1719	32.2921	25.7191	38.2283	38.8149	48.2179	8.7599	30.1299	34.7522	31.1277	54.6709
67.80542028_501.1364918__[M+Cl]- 32.8404_3	145.708	160.305	202.356	17.6485	21.9364	21.2125	7.84507	3.6059	8.0369	8.06632	15.2836	0.0396846	12.8013	10.5201	4.61763	4.8783	0.0198348	0.0207037	4.01404	2.34545	6.25382	0.0210019	2.55134	5.10992	18.73	27.2443	9.56249	14.1528	10.9421	11.189	12.7138	8.69415	26.7877	6.90328	0.0313307	3.2196
67.92109794_1115.232537___5296	39.3725	92.469	50.4349	44.5535	66.3807	42.4266	50.8789	28.8916	40.2704	44.3525	45.9769	26.3578	25.3371	106.501	88.8008	103.211	61.3209	77.4319	77.3462	46.6643	78.3112	50.4155	65.8898	60.614	62.6027	79.3143	45.0528	34.2336	70.2694	50.5102	41.7089	32.0566	45.0245	38.1642	41.4328	81.3575
68.01415112_419.6709115__[M-2H]2- 138.042_6	304.199	177.205	339.521	367.514	396.738	482.372	146.321	137.124	92.6122	119.804	87.4285	91.6246	791.615	669.796	704.945	120.244	85.7248	138.036	96.5418	107.454	165.89	82.4594	96.2904	58.1998	109.859	522.087	121.505	176.315	279.604	354.625	34.7246	40.1803	47.1376	47.9296	58.0435	51.0913
68.11467952_1116.363406___5251	53.4297	41.6817	42.1649	26.4123	44.2541	42.4285	42.4675	39.1972	35.8103	15.9355	22.7149	17.6017	32.9744	90.4733	97.8911	58.6026	68.8825	24.8014	53.8268	20.9987	60.4499	57.2413	65.7776	25.5834	74.1313	45.8048	47.6941	25.7111	47.0685	44.3289	44.3712	8.62731	14.8274	27.388	17.0548	55.412
68.21285409_419.0004032___6	269.575	343.675	296.089	345.091	303.104	294.881	35.0275	36.0851	32.2472	32.0551	26.6087	17.4744	588.801	350.848	632.682	73.6491	38.8371	83.6881	69.0065	116.155	96.486	6.88015	7.61302	12.6678	135.293	452.356	202.233	200.232	179.467	362.654	18.9631	72.0538	14.7489	13.7145	13.6573	12.7728
68.22041221_484.6602337___6523	14.6169	18.396	50.1964	4.43485	26.4835	24.5696	3.89333	18.122	12.14	4.00331	3.7925	0.0396846	5.06209	7.80115	20.5298	9.67219	6.47529	6.76274	9.92353	2.3258	6.1804	9.14702	5.06309	7.59127	21.5989	23.9433	6.31081	8.41622	8.13107	16.5712	9.45267	5.73015	8.82173	34.224	17.026	19.147
68.41114611_419.4956453___6	235.311	283.772	289.645	172.137	133.892	273.044	62.1948	32.4406	32.2083	44.0228	37.9643	30.5801	336.79	283.248	262.564	35.6307	19.4185	58.1486	21.8744	48.877	49.5684	6.87202	12.6884	7.60069	104.021	299.073	158.479	106.255	160.775	161.227	22.0911	25.8365	38.3013	27.3956	23.8704	35.0804
68.60675921_420.5546786___6	160.756	148.277	153.621	98.254	63.0019	156.673	43.3368	18.2645	28.5652	32.0556	11.5477	13.2689	133.392	124.714	133.97	26.6203	8.62264	28.1669	13.8906	27.9306	22.6695	2.29032	7.601	5.0552	24.6412	151.206	72.4743	50.5105	48.8775	99.9782	15.7841	17.2202	11.7833	27.3809	20.4675	25.5114
68.80582663_418.5922872__[M+Cl]- 33.8318 [M-H]- 69.8148_6	137.217	68.1012	123.422	39.8141	83.4938	98.2181	62.1251	36.0087	32.2083	32.0083	30.336	34.906	63.0839	57.2399	52.4692	19.3612	36.6786	42.9195	13.9037	16.2738	12.3792	16.0347	20.2773	17.714	40.0896	109.094	44.0648	25.2286	29.8427	38.5918	28.371	34.4116	26.4861	23.9712	10.2181	12.7415
69.01138974_1094.13518___24	1208.41	1280.09	1695.35	1008.24	866.161	1086.89	1311.05	1343.68	1374.27	966.941	1301.58	1137.29	61.2007	167.399	100.959	96.7891	108.221	78.3544	92.482	96.335	73.0512	115.434	102.063	111.865	470.597	1050.13	602.819	458.181	748.963	655.971	387.57	471.65	585.95	448.287	496.005	523.526
69.08626322_772.3867144___8795	14.5623	13.711	7.73701	4.40835	22.0056	10.4856	3.87914	18.0854	4.03942	4.00811	7.54417	4.36098	12.9854	10.6121	9.31623	4.91146	8.94189	16.0699	6.17169	11.7969	6.37126	18.9063	13.0452	5.23323	15.2591	17.9819	12.3853	24.9257	8.25408	14.0173	15.5255	41.1546	26.2862	33.3685	13.4108	19.3082
69.21300979_409.1671201___9219	43.9177	55.8178	27.4199	17.9543	48.4597	77.3884	31.1339	36.6492	36.753	68.077	53.181	26.5505	27.8055	31.2516	45.6187	16.9439	24.6557	24.8598	23.8419	27.9261	18.5606	20.6271	15.2182	12.6622	43.1472	90.4804	34.6646	16.8424	24.4121	44.1215	25.241	17.2342	23.5808	17.1197	13.6392	15.9406
69.28622498_772.3702948___8796	9.70713	9.14026	3.86849	8.81671	4.40123	0.0319682	11.6374	7.23363	20.1945	8.0162	7.54477	8.72141	10.235	16.1543	9.45651	24.9165	6.60436	6.99144	2.02645	7.184	14.6447	4.65618	23.1326	12.8884	24.4268	11.9941	3.0987	11.077	11.0138	16.7991	15.5254	45.4424	17.5233	16.6887	36.9481	16.0958
69.30536718_1114.477502___5266	9.87991	32.8839	62.1785	8.92555	22.2057	28.3822	31.3677	18.0889	12.1021	36.3405	30.7589	26.4517	15.2202	78.4885	38.818	55.8407	65.7676	54.1366	57.7874	14.0338	46.3844	55.0613	75.4207	63.4604	31.4128	45.1869	35.5211	31.4931	16.3857	44.3737	22.5046	43.882	42.1865	41.7782	41.5095	28.9493
69.49368769_775.4781371___3132	0.044486	9.12595	7.74651	8.80142	4.39344	7.0006	19.4173	18.1052	16.1783	8.02925	3.77771	8.73337	2.55874	7.95296	13.9717	7.35884	4.39968	6.89359	4.05221	11.791	6.27821	9.31458	20.5591	12.8862	18.3585	12.025	27.96	19.3753	8.27072	22.4396	15.5469	37.085	35.0332	30.0731	16.8884	9.67936
69.52714337_988.9703538___3844	4.88189	27.537	34.6669	8.83716	21.9432	35.1059	11.6321	35.8082	23.9944	39.9714	26.6073	43.5714	51.6507	39.584	95.3047	36.6017	45.7976	27.1567	93.1336	14.082	55.706	49.9579	17.5886	125.436	62.2648	173.309	28.6816	57.1094	46.5847	36.4468	102.371	47.3489	167.971	41.2382	536.495	29.0582
69.53638591_954.1181792___8436	4.8686	13.9474	31.1426	8.94019	22.2486	17.7793	31.4401	36.2333	20.23	20.2203	23.0648	30.8905	154.168	78.1901	183.186	36.6116	138.758	86.7351	102.22	4.68004	119.466	41.3587	45.868	57.2504	52.7212	75.3051	22.3855	31.2285	21.8647	47.2839	6.31762	29.1359	29.7714	40.9638	20.731	32.1111
69.59537322_376.12458___1112	14.6411	22.975	11.5899	8.88111	17.631	21.1287	23.3667	18.095	16.115	8.03629	7.59936	13.1391	25.3232	7.81598	15.9899	9.69217	15.1296	4.52629	3.97535	16.3268	2.06337	18.3459	10.1532	12.6643	18.5456	14.9821	15.8443	8.44858	10.8668	35.957	9.50365	34.6008	14.7939	68.8208	20.5455	28.7803
69.73474228_953.76097___8437	9.84694	32.4203	19.4634	17.8442	26.6029	39.0363	39.1477	14.4668	20.1535	16.1761	23.0167	35.1744	125.692	64.3713	208.205	46.2523	92.2897	73.4325	93.0271	9.34824	119.684	65.3737	48.296	87.0642	47.0306	72.2002	19.4573	45.9107	51.3443	33.3335	19.1848	17.4509	33.1026	41.4685	31.0424	22.4442
69.79689487_376.4180069___1113	0.044486	13.785	7.72658	0.0402612	13.2409	14.0858	27.2611	14.476	0.0365954	4.01815	11.399	17.5188	17.7263	7.81598	20.5584	16.9613	6.48413	2.26315	3.97535	11.662	8.25347	4.58647	12.6914	12.6643	15.4546	14.9821	9.50659	5.63239	2.71671	38.7229	19.0073	31.7174	17.7526	34.3284	30.8182	36.3015
69.92309502_1116.347201___5271	19.656	18.465	34.8626	17.7941	8.83709	28.2416	27.3078	14.4201	28.145	24.1542	34.4319	8.77215	25.6329	88.0138	68.0234	46.0267	39.4881	38.7248	45.8825	48.9452	71.8041	49.5543	51.2787	48.5356	40.6289	39.5704	44.9855	11.3929	44.1502	25.2166	38.4415	17.4321	35.9557	24.2483	20.6838	22.7448
69.92500011_976.0411069___75	0.044486	37.0493	58.3334	13.3812	75.386	42.1779	58.7516	101.048	72.6255	126.159	107.703	131.622	27.741	39.0349	50.1806	34.0325	21.7108	31.5602	21.4126	9.335	22.8358	22.9631	46.1332	53.2147	47.1195	55.5241	91.6125	43.2895	47.0238	71.8855	3.17966	99.2444	56.0473	91.0533	34.4686	52.1301
69.94449444_954.3885231___8433	24.2764	46.3156	19.428	13.3859	26.645	24.7965	27.4047	14.4669	24.1827	64.5869	49.8828	21.98	65.9669	126.638	192.053	186.362	218.391	75.3759	230.607	9.34833	136.74	89.6343	156.311	109.707	37.1155	76.967	28.7489	34.4486	41.5018	110.028	34.711	17.4488	32.7103	34.1093	20.6877	42.2724
70.0078672_375.9205268___1114	9.78889	13.8235	11.6254	4.4481	39.7835	28.2146	15.6009	28.9958	24.2082	12.0719	11.4157	26.3167	7.61832	23.5116	18.3269	2.42999	8.66955	4.53885	3.98606	4.66479	2.06921	13.7973	5.0907	5.07966	15.4983	24.0382	25.3509	8.44858	8.17315	33.285	9.52014	28.834	20.7426	34.37	10.291	25.6574
70.00305803_424.3052791___13	124.122	156.855	214.87	26.5595	44.0387	58.5437	35.0159	61.3304	12.0917	24.05	15.2067	17.448	38.7152	15.8446	20.8608	7.35956	21.9169	20.6498	14.1236	16.3138	18.8609	11.6314	23.1536	20.5597	21.9348	45.571	52.8094	11.3991	13.7754	39.2394	6.41204	20.3692	38.8108	41.689	24.2532	35.6289
70.00553717_332.8801179___3708	4.89434	13.8275	15.5046	17.7962	4.41595	3.5259	7.80296	7.26462	4.04407	0.0365366	0.034555	4.3842	22.86	10.4583	43.5593	14.5966	6.49522	6.81917	11.9629	7.01178	8.27746	4.60033	5.09536	5.08496	9.303	18.042	6.34873	11.279	19.0627	30.5136	6.35974	17.3527	11.8327	24.0789	17.1426	3.20537
70.12640673_1116.294195___5255	0.044486	27.7408	22.9733	8.79433	17.7016	7.07142	23.4431	14.2535	7.94867	27.8549	42.1479	30.7506	20.5375	118.164	103.438	55.7746	66.7057	41.0746	62.4681	48.9584	68.6026	60.2242	74.228	40.9335	24.7104	56.1657	32.1806	45.6296	44.2255	30.8653	28.4928	28.7577	18.0098	20.541	23.8493	22.7801
70.1448198_954.4420588___8438	4.85529	23.1578	34.9703	8.81366	39.9026	63.7623	35.2346	10.8501	16.1218	24.2201	26.8599	30.772	22.8347	80.9012	101.637	207.93	163.21	56.3963	174.683	18.6967	100.978	110.552	98.4999	153.328	37.1155	89.2875	28.7489	17.0136	142.854	73.2093	15.7777	26.1732	23.7632	44.3421	20.6877	16.2586
70.19523726_424.5304433___13	204.493	221.119	314.138	39.8866	52.8456	51.1074	15.563	28.8499	44.3335	12.025	15.2069	13.1019	17.983	31.7508	13.9072	2.45768	4.38244	4.58884	8.07065	14.1851	16.7652	4.65256	20.581	17.9898	47.0032	74.5277	44.8198	17.0979	19.3239	16.8182	38.4652	17.4909	17.9448	20.8445	17.3247	3.23931
70.21005392_332.8557469___3709	14.683	13.8275	11.6316	8.88269	22.0798	21.1554	7.80296	7.25294	8.07486	4.01861	3.80832	4.37766	15.24	31.3748	18.2734	9.7168	19.4857	2.27306	9.95529	4.66754	4.13176	2.29695	5.09536	5.08496	24.7715	15.035	12.6788	11.2622	5.44648	30.5136	22.2202	17.3272	8.87449	20.6067	13.6939	16.0268
70.25192915_124.369566___7305	0.044486	0.0417716	0.0352303	0.0402612	0.0400679	0.0319682	3.87144	0.0328174	0.0365954	0.0365366	3.77695	216.973	0.0232039	0.0238966	228.355	0.0221872	0.0198348	630.046	198.988	376.05	138.411	229.44	397.824	0.0232341	3.10102	0.0274813	3.16097	2.81888	0.0249155	0.0253439	0.0290452	2.88813	0.0271353	0.0314148	0.0313307	0.0293344
70.33002359_1115.700879___5219	19.6863	55.4814	42.6757	17.8214	30.9777	28.2844	27.3963	43.3374	24.1623	44.3525	19.1899	17.5719	63.3427	94.6415	105.708	83.5387	47.7078	40.5297	73.7258	55.9972	84.5536	67.5658	90.3278	53.0373	50.0822	42.1719	54.7964	45.6449	61.9717	75.7653	41.7089	37.8851	45.1115	41.6337	31.0746	51.455
70.35316157_954.832661___8439	0.044486	18.467	19.3653	8.90904	8.84058	24.7157	27.315	18.025	12.0527	52.2948	26.8149	13.1452	20.512	67.6896	68.384	154.577	124.013	29.3249	94.8154	9.32773	88.3328	76.0149	112.751	30.3755	43.7639	76.004	28.7139	11.465	95.0076	53.3267	6.30501	14.5134	39.0199	44.3018	6.88425	51.8507
70.42592256_501.4865824__[M+Cl+NH3]- 18.4285 [M-H+NH3]- 54.4028_3	331.123	240.079	442.07	8.83329	30.7881	35.0318	3.88698	3.6187	12.0959	3.99561	3.78707	8.68406	5.06579	7.80871	2.28346	12.2585	4.32063	4.57999	10.0516	2.35735	4.18493	9.27104	2.56446	2.55916	9.253	26.9591	0.0290008	5.60837	8.13313	16.602	3.14889	5.74517	5.88174	10.2587	10.2152	6.38133
70.41475008_415.6502973__[3M-H+Cl]2- 35.6325_6	73.2	81.0325	69.7716	53.228	128.22	86.6128	93.421	60.6968	52.4801	64.0782	60.8256	13.1254	10.1275	36.4896	41.1093	21.8098	17.2827	22.6174	13.9366	25.634	45.5043	55.8731	42.5259	36.3966	27.792	77.8594	34.6916	30.9115	24.447	41.4533	12.6405	17.2463	20.6511	44.575	50.8767	55.7247
70.43842039_123.9252782___7306	0.044486	0.0417716	0.0352303	0.0402612	0.0400679	0.0319682	3.87144	0.0328174	0.0365954	0.0365366	0.034555	0.0396846	0.0232039	5.22612	0.0209605	2.42614	0.0198348	373.104	299.108	511.796	120.383	345.657	584.687	268.223	3.10102	0.0274813	0.0290008	2.81888	2.72333	0.0253439	0.0290452	0.0264366	2.96446	0.0314148	0.0313307	0.0293344
70.52566925_1115.946355___5297	29.1435	60.1051	19.1444	13.1915	13.2762	17.6786	31.2574	17.8169	31.7947	19.8963	26.8214	26.3576	28.2391	96.968	55.5749	50.9246	30.3595	68.4056	74.4525	51.3301	47.5358	55.7235	74.2952	84.1182	46.3321	42.6795	34.9757	37.074	16.5846	50.5814	28.4928	37.385	20.7301	41.082	17.0352	71.5894
70.60606632_418.3732238__[M+Cl]- 35.6325 [M-H]- 71.6111_6	103.289	55.5466	65.2129	84.8356	110.677	73.7612	74.5071	86.8318	48.7432	47.8579	51.1536	35.219	37.786	18.131	20.4471	4.82483	19.3409	20.2506	1.97973	27.8416	30.849	27.3959	35.3623	44.111	36.85	41.707	50.2634	16.7841	13.5096	27.4862	25.1699	20.0305	26.4312	34.1283	34.0017	25.4043
70.63026121_501.2545617___3	412.139	257.285	349.951	35.3332	30.7881	21.0191	11.6609	21.7122	4.03196	19.978	7.57414	8.68406	12.6645	10.4116	6.85039	4.9034	4.32063	6.8568	8.04129	4.7147	14.6175	4.6259	5.11954	15.3549	12.3373	20.9682	12.6143	14.0209	2.71104	13.835	6.29032	14.3461	8.82261	6.83056	3.40508	9.57199
70.80394073_326.0538864___2294	4.88051	9.18918	44.1029	4.43125	30.8251	42.1884	11.6712	14.4639	4.02449	8.0405	7.59546	0.0396846	22.7924	13.0423	6.84765	2.4266	8.64281	11.3329	3.9781	0.0213417	2.06365	4.59072	2.54122	5.07099	40.7765	95.8064	75.5512	14.0781	5.42483	30.434	9.51198	11.5385	8.86471	20.8684	23.9305	6.39147
70.83200834_501.6594661__[3M-H]- 23.9392_3	256.5	168.283	343.56	8.83583	26.68	35.4138	3.92946	10.8311	4.02357	0.0365366	15.3104	0.0396846	10.2588	7.90338	4.62538	4.88595	2.18317	11.4075	10.035	0.0213417	2.08498	6.9297	5.11057	2.55917	15.6382	9.09646	22.3464	2.83511	5.47974	11.2077	3.18326	8.70701	2.97638	6.91415	6.884	9.67387
70.81513214_399.6967474___254	29.493	32.4113	23.3745	71.5369	133.493	110.568	86.3879	105.703	77.2031	56.5387	53.6388	44.0689	17.8534	23.645	27.614	12.2165	13.0619	20.5311	18.0578	35.2205	8.32635	20.8206	40.9662	45.9816	49.759	107.664	25.4504	53.8249	40.061	84.8537	31.8481	52.1986	53.5473	55.29	65.381	70.7353
70.86127594_633.8984846___1946	0.044486	4.57764	0.0352303	13.1922	8.79831	3.50563	3.88382	7.21222	4.02343	20.0549	0.034555	8.69614	5.10523	2.63753	4.62507	9.7759	4.35763	6.84625	6.02262	2.34916	6.24494	6.91838	7.6494	0.0232341	3.10549	18.1632	15.8825	53.621	75.3177	61.0586	56.0648	64.4091	68.1668	24.1889	13.7174	19.3968
71.01355755_132.0923119___6831	244.97	330.985	274.659	482.486	1119.64	764.134	825.432	771.434	869.824	1639	1382.7	1387.17	965.475	909.008	724.772	796.38	596.93	758.928	1047.23	1708.11	1256.24	1446.71	1984.03	2175.49	314.857	416.683	483.33	1148.05	790.029	1374.1	993.706	1420.79	868.899	1936.75	1987.72	1647.91
71.01571225_306.3805801__[M-H-CO2]- 116.013_15	1060.28	1402.56	1267.41	581.582	656.591	524.919	623.044	606.056	484.484	719.062	605.037	625.873	369.438	950.123	832.45	446.236	665.679	493.355	502.403	304.429	631.716	509.066	616.455	506.071	1152.19	1110.42	1008.94	541.953	411.042	701.329	425.23	553.856	397.955	628.379	371.093	636.692
71.01569449_260.0459942___4757	1063.48	1315.18	1089.32	686.38	837.743	806.495	468.999	519.394	589.774	416.646	350.109	432.297	713.58	635.951	754.808	293.944	328.257	319.05	288.565	261.672	251.09	242.161	337.133	323.27	495.789	713.354	647.257	298.822	267.501	411.712	279.056	424.639	313.051	562.168	341.249	478.911
71.0156327_337.1761936__[M+Cl]- 36.0462 [M-H]- 72.0229_65	361.395	405.764	387.272	365.8	442.497	431.472	356.838	361.21	327.004	562.328	615.743	543.051	408.872	441.677	437.932	390.283	351.241	397.073	417.958	366.143	390.592	381.009	423.09	489.514	544.45	662.167	496.572	389.161	337.381	545.719	429.285	626.572	498.033	563.922	556.878	690.847
71.01564753_376.3094025___8	302.742	476.778	352.442	297.496	377.355	264.512	347.267	214.452	332.398	817.32	833.481	522.49	195.08	274.247	216.436	217.061	295.442	220.147	255.687	253.855	292.368	310.816	351.168	638.232	298.597	328.835	267.093	314.784	349.256	518.132	408.828	462.059	458.088	425.557	483.626	560.472
71.01554724_451.936322___2626	124.756	211.061	103.914	186.344	256.617	207.503	186.336	222.951	225.031	376.71	369.581	218.231	126.5	116.423	114.239	134.45	169.328	128.414	169.175	136.146	132.011	292.136	319.152	343.173	299.736	308.59	288.963	273.066	217.549	274.188	319.309	347.316	339.101	641.874	436.475	526.652
71.01603086_560.4164714__[M-H-COCH2]- 114.034_20	180.867	262.943	193.711	303.88	333.76	381.94	364.345	214.678	292.05	539.915	531.063	380.331	61.0925	107.337	103.624	108.919	128.196	99.6527	153.84	181.104	152.595	204.533	181.693	196.817	179.815	267.547	216.186	309.934	261.293	402.961	275.868	375.287	365.248	435.31	345.641	424.145
71.01585074_504.9042631___3	150.11	247.357	193.54	163.346	175.957	210.438	194.455	141.189	173.335	271.875	164.244	199.841	113.75	132.74	121.52	202.04	183.208	153.823	180.296	158.467	240.143	154.242	179.413	197.389	529.277	422.543	723.779	232.374	215.537	316.901	245.311	352.935	270.143	373.683	302.249	318.947
71.06572622_633.6176386___1947	4.87098	0.0417716	0.0352303	13.2087	17.5966	7.01126	11.6515	7.21222	8.04686	8.02194	3.78911	13.0618	7.65785	0.0238966	9.25014	2.44398	4.3695	6.84625	6.032	0.0213417	8.32658	2.30613	5.0996	15.3596	24.9151	27.279	31.7649	57.4802	80.9717	71.2299	44.7439	111.955	44.715	26.4079	6.86771	22.6296
71.2194422_399.6287038___1	54.3158	88.3813	80.8034	67.5362	107.151	117.536	59.0775	96.5231	73.4859	73.172	80.6949	57.6717	15.1686	28.6431	29.6091	31.4819	25.9657	31.6507	17.8943	23.2713	26.8175	41.2605	27.9122	25.2862	86.3648	154.72	78.8351	85.8928	70.3833	99.4127	56.8163	54.8218	94.3934	75.3393	51.1717	54.1655
71.42375013_400.0642786__[M+Cl]- 36.4552_1	64.4174	88.1492	86.1202	67.4109	75.7687	133.055	78.6386	90.2056	68.46	85.072	37.2513	53.1335	15.3501	23.4352	22.8025	24.1887	10.9168	20.3469	11.9181	20.9202	26.7872	11.4483	17.7622	27.8454	115.745	151.645	65.819	42.6245	74.2722	157.958	59.1771	54.857	62.661	48.5236	31.072	51.5952
71.62586029_399.6545592__[M-H-CH3]- 87.659_1	277.731	239.608	316.235	76.399	138.667	158.745	86.6471	86.8325	77.9629	52.7511	87.5874	44.2779	35.3933	26.0392	25.0828	26.6076	15.1007	29.0545	5.96572	25.5692	8.25164	22.928	20.2996	10.1256	86.3504	100.879	81.9885	36.5017	54.2465	63.7435	41.034	51.7513	26.5346	23.9716	20.4687	31.8621
71.82949841_399.9405392__[M+Cl]- 36.858_1	214.965	231.454	230.506	58.3096	75.6576	39.1048	31.507	50.5851	48.3247	44.5615	46.0347	48.6217	30.7002	26.3489	27.6953	19.3732	15.2835	29.7448	10.0625	20.9202	12.527	13.9254	5.13604	15.3724	28.0711	66.5861	44.7448	34.0996	27.4519	55.8041	19.1673	53.7795	32.8224	27.7281	10.3573	22.5729
72.01013547_138.4470399___6841	78.7258	64.8067	96.8776	57.9362	475.302	56.5441	78.3428	47.2535	28.3262	60.6807	87.962	238.102	85.6956	126.843	136.853	43.4626	32.3654	51.877	149.472	307.369	85.0526	675.489	501.581	651.113	150.592	242.519	245.915	45.1097	94.7611	97.5847	91.2577	132.133	147.651	117.88	61.8051	134.097
72.02387787_450.3044932___2827	14.6507	27.6355	19.3918	117.787	209.331	128.481	70.2648	128.509	121.589	36.2115	32.1059	70.0091	15.2371	5.21315	20.5989	9.69524	8.64891	11.345	11.98	11.6746	10.348	9.17716	22.9065	17.7719	18.6018	27.0055	22.1478	14.0398	13.5702	13.8407	9.49505	20.1707	20.6615	27.4263	27.3643	32.0014
72.23054024_449.7246128___2828	29.2989	32.2404	19.3891	94.2935	143.543	154.398	67.5518	92.1969	90.6646	40.0601	34.2238	26.2496	22.8528	31.2766	15.9972	7.27225	6.48677	9.06225	9.96861	18.6793	10.3281	2.29447	2.54131	7.60537	15.479	27.0067	9.48989	14.0402	13.5717	13.8406	6.33073	23.0529	11.8074	6.8586	17.1038	16.0017
72.40148445_1105.44759___55	4.86754	23.2392	46.7122	40.2183	26.6282	24.8278	47.0635	36.2432	32.3517	35.7665	49.9901	26.5011	20.3018	41.7331	27.4581	24.3062	21.7287	15.7839	32.0598	18.7116	22.8696	20.6768	10.152	22.7934	37.2604	69.4611	29.0404	45.504	47.5453	75.5896	69.4734	96.5099	53.8761	56.6514	45.1257	71.7655
72.4349845_446.9343847___2829	78.4559	55.4532	62.2187	89.241	163.799	141.056	136.941	76.0747	182.144	44.3135	30.5576	39.5237	28.0147	36.5944	32.1106	14.6098	13.0176	45.4518	11.9933	16.409	22.8097	9.21923	22.9303	43.2461	21.7325	24.0789	76.2078	31.0416	40.8861	11.1066	31.78	28.918	17.7839	30.9847	30.9202	25.6775
72.45574164_419.6408908__[M-H-CH4]- 89.5003_6	29.2122	54.9863	50.1944	44.192	57.1429	81.4559	62.123	54.717	52.9656	35.9796	30.3373	30.5073	35.5682	56.388	63.8189	24.1737	21.5519	15.795	27.7755	27.8984	16.4871	6.86418	7.59369	0.0232341	45.7109	93.9417	36.6808	42.0461	46.0657	55.1335	15.7624	28.6694	20.6	17.0987	10.2211	35.0421
72.54348461_475.060024__[M+Cl]- 37.5748_2	186.794	115.17	148.842	53.2486	48.6151	40.2925	19.4963	18.3594	28.7038	12.0119	11.42	4.36789	7.60333	10.411	4.56791	7.25766	6.47761	6.78489	0.0182778	2.32665	2.06603	4.57903	2.53709	2.53422	252.337	300.058	273.522	61.9867	46.2788	51.649	3.15303	54.9023	12.7179	17.1328	6.81199	9.5643
72.65102702_474.7596712___2	313.458	284.146	394.478	26.6243	57.4541	71.834	7.79851	14.6876	32.8043	3.99905	19.01	8.73578	22.78	23.3948	22.8047	4.83844	4.31841	4.51746	7.95075	0.0213417	8.25135	4.57324	7.59939	7.59105	111.262	271.358	203.167	84.7142	70.8859	133.171	15.7651	29.4357	23.548	30.7889	37.4659	25.5048
72.6360321_397.2209428___255	34.0939	36.6653	46.3174	62.0674	66.0748	31.6187	34.968	54.21	52.3494	24.0146	49.6434	78.6312	17.6899	13.0049	11.3839	12.0971	6.46562	6.77408	1.98605	4.6539	12.3628	4.58006	17.7456	15.1689	43.1158	53.734	57.8553	106.668	94.1085	150.18	63.3859	80.7002	26.5379	43.2356	13.6432	15.9342
72.65737883_419.7397157___851	24.4004	41.3439	69.6683	57.5893	88.0889	91.4102	66.163	46.9107	32.2472	36.062	30.4099	21.843	26.3413	83.3459	38.786	26.6543	12.9646	9.03569	7.95431	20.9732	22.7234	6.88015	20.3014	32.8955	46.2597	80.8769	47.3194	41.5526	24.4464	35.9234	22.1236	31.6153	11.7992	24.0005	23.9003	12.7728
72.75601811_474.9049098___2	144.859	183.234	212.55	8.87476	44.1955	45.8353	11.6978	3.62216	4.04504	11.9972	15.2266	4.36789	7.60333	7.80821	17.5873	2.42261	6.48629	0.0207037	7.95075	0.0213417	0.0189364	9.14649	0.0232272	0.0232341	202.235	139.911	141.349	113.651	39.9235	95.012	12.6121	14.3581	23.548	10.263	10.2317	6.38452
72.99506998_310.5045761__[M+2Cl]2- 76.0471 [M-H+Cl]2- 112.02_117	397.913	322.459	332.767	191.304	201.84	207.045	182.318	191.463	160.562	200.411	128.81	185.066	195.76	270.127	215.478	96.9393	145.751	177.073	131.338	108.22	80.0732	78.2471	100.869	88.539	266.952	438.549	297.042	171.051	102.142	200.661	160.515	137.993	155.373	102.43	95.3401	127.209
72.99471897_368.1595782__[M+2Cl]2- 76.0447_4	113.279	166.936	105.129	116.145	168.98	130.334	133.427	102.095	89.3393	145.576	183.507	145.367	43.4171	68.3506	46.0965	90.3072	89.373	73.128	86.399	77.47	47.8851	76.2001	84.5082	74.1467	376.075	432.571	463.76	127.575	128.814	166.362	133.998	121.704	144.713	120.874	127.548	122.506
72.99210386_132.089462___6845	425.53	315.76	280.832	318.16	496.879	262.453	224.383	96.3365	273.473	218.733	264.4	516.655	455.848	635.382	0.0209605	223.518	0.0198348	79.1536	0.0182778	0.0213417	394.369	0.0210019	356.946	562.328	164.481	165.618	149.482	81.9624	152.852	142.631	114.642	153.969	170.28	151.408	137.649	255.891
73.03138337_371.186941__[M-H]- 74.0334_4	116.612	109.787	157.86	141.242	158.806	219.634	85.1827	133.109	176.095	275.912	272.669	252.239	225.471	187.893	183.829	241.123	238.493	202.831	282.666	267.292	326.356	369.454	418.499	344.355	193.548	240.154	172.246	488.996	253.52	245.009	253.253	368.449	240.166	318.692	267.332	363.799
73.03127213_451.818233___2644	151.206	142.572	116.056	116.402	171.854	125.971	109.293	129.646	112.653	270.885	248.054	104.188	68.4173	93.6064	77.5045	77.448	99.2161	70.0573	125.738	109.346	105.286	226.906	319.532	269.34	163.997	209.86	207.014	164.231	115.039	240.904	185.436	196.352	209.397	467.888	343.658	318.675
73.03156251_259.9442842___4761	483.729	608.874	538.087	282.081	401.174	348.294	247.768	235.788	296.537	142.038	168.404	132.324	115.581	152.591	155.014	43.4203	47.2265	76.6011	65.9436	87.0374	63.6279	95.8565	98.0259	95.7659	130.704	199.105	179.279	85.1143	43.7103	121.95	51.3037	87.259	100.236	65.5758	72.5409	102.933
73.03231966_571.1270407___7494	33.9534	105.278	46.1404	126.805	145.586	166.62	123.122	92.9334	83.4968	231.38	240.605	215.593	30.3281	49.4157	41.16	48.3513	54.6236	45.0017	81.8233	62.3346	57.7751	73.3707	63.1234	94.7424	55.4028	44.8109	73.7506	96.4398	59.0872	126.166	103.626	127.705	95.104	68.2843	67.883	89.3878
73.03133372_332.0280699__[M-H]- 74.0363 [M-H-CO]- 102.033_44	73.8224	69.5455	97.4667	49.7005	88.797	42.5551	35.3062	51.0509	40.5918	85.3815	99.5656	92.5604	114.734	118.536	101.488	58.7182	78.4852	61.8505	78.1953	65.8137	86.5199	109.965	71.754	84.006	99.7896	129.218	130.866	81.5366	63.2122	106.052	76.7661	113.27	110.248	145.274	131.021	167.579
73.06420881_398.6874277___1	241.379	182.404	223.827	67.3997	98.0539	103.005	103.645	80.4483	69.405	84.0665	57.3171	26.57	25.252	18.2279	31.9125	21.7747	19.3961	18.0877	1.98609	27.8922	10.3143	11.4899	15.2242	15.2725	33.9119	81.3168	50.513	52.8353	101.386	125.781	31.5259	45.944	23.5608	23.9491	6.8144	25.4627
73.26579571_399.9583057__[M+Cl]- 38.2982_1	158.417	292.282	286.229	192.546	152.734	95.9845	66.8428	80.436	74.7312	105.327	84.3969	57.5612	29.1822	36.8885	43.6603	12.0944	10.9168	41.1851	9.93172	20.9202	18.545	25.1862	25.3463	25.6207	31.1423	72.8046	60.6248	51.1494	90.6016	58.5943	22.3618	37.9856	35.8063	31.1938	20.7147	29.0223
73.76028289_774.3157808___8797	4.86784	9.14029	7.75816	8.81518	13.2006	17.5263	15.5619	14.5072	20.249	8.04138	15.1327	0.0396846	5.12577	13.2805	11.6642	7.37322	8.81707	2.3007	10.1477	4.72367	6.28517	11.6584	12.8712	23.2305	15.3142	9.02878	18.6492	33.2704	8.28063	36.5143	34.2584	28.4428	49.7168	46.8862	30.3701	12.9243
73.77453375_136.0929293___6847	4.88205	4.59033	0.0352303	0.0402612	4.39567	0.0319682	3.88529	0.0328174	0.0365954	4.01205	0.034555	4.3611	131.086	130.767	118.744	0.0221872	0.0198348	0.0207037	0.0182778	0.0213417	2.07246	4.6006	2.54463	7.62681	3.11709	6.04218	6.38089	2.83521	2.73906	2.78384	0.0290452	0.0264366	2.98415	6.91371	0.0313307	3.22731
73.87512341_420.0313697___6	93.021	83.568	194.104	58.1383	62.3287	48.4328	55.062	58.3548	61.1097	32.4063	46.1099	26.4506	32.8387	28.5392	38.7007	9.65897	19.3767	13.5243	11.8916	9.28967	10.2935	11.4272	12.64	5.04904	30.7703	38.8009	34.5887	36.3977	27.0691	22.0552	28.3444	14.3206	20.5764	17.0766	17.0194	9.54608
74.00562346_1093.443716___24	422.39	587.736	456.606	355.844	983.712	525.136	425.545	407.954	425.198	446.01	526.474	434.653	48.6778	33.9031	52.6089	34	41.2791	20.4979	24.0315	13.0945	43.6544	20.6876	48.7115	33.2723	247.037	187.124	248.222	195.461	270.464	289.822	225.906	187.807	268.776	298.884	234.667	297.888
74.02601717_250.9450862___8371	78.8736	87.9403	132.323	85.0064	146.356	195.612	105.784	139.349	84.6981	129.66	118.329	105.701	68.6251	115.733	80.3803	65.1386	64.4572	70.728	57.3273	30.1103	41.0447	96.0311	145.391	145.887	141.836	122.919	116.608	93.0035	83.0285	188.149	172.611	250.074	218.854	97.7561	115.097	78.1553
74.09319376_403.7151257__[3M-H]- 25.0406_1	229.097	721.572	727.357	220.757	374.498	224.324	300.04	252.749	237.601	232.485	218.123	196.119	114.057	106.438	113.575	31.9126	50.2116	26.2869	10.0782	30.6164	27.1886	27.8965	23.1489	30.7506	76.2032	99.4845	66.994	59.6551	79.0695	93.4689	15.9694	67.8214	38.7853	47.9437	24.1561	16.1212
74.24395822_1109.370333___1614	14.6095	32.0172	34.5522	17.6293	35.0071	31.4753	27.0304	3.57251	19.9233	31.9084	30.3275	13.0354	25.7693	30.3126	30.1663	12.3292	35.2707	4.57977	44.7185	14.236	16.8634	11.6493	12.8873	7.70598	86.3043	192.409	125.099	73.2754	98.299	129.995	41.3308	87.9733	47.5097	58.4144	54.7095	111.838
74.29778186_403.1708093___1	1007.46	797.654	918.18	379.193	521.81	470.709	344.084	339.348	360.252	364.49	297.846	276.887	97.8327	142.817	103.43	69.3462	69.1677	74.4539	30.1328	25.8648	35.5062	20.8533	18.0238	43.9392	69.8173	111.325	86.0971	71.9327	60.5869	108.473	28.3384	59.1667	38.2358	30.7479	13.6111	16.0739
74.45138566_1109.266254___1615	14.6291	13.7404	38.3913	17.6293	21.885	17.4864	27.0641	35.7251	35.8619	23.9313	37.9002	8.70239	12.7194	21.1704	25.5254	14.8251	33.0663	4.52085	24.3919	16.6424	16.8969	13.7986	12.7238	7.5984	55.9063	185.353	89.0939	54.6813	148.85	107.605	31.7929	66.3953	62.3164	58.4806	41.0321	144.534
74.50552891_399.0317022__[M+Cl]- 39.5354 [M-H+Cl]2- 115.059_1	19066.6	15358.3	21415.3	16624.6	18331.9	21656.7	11624	12968.1	11133	12416	12617.1	9769.56	16780.6	18209.5	15699.5	9758.34	11223.2	11541.7	3821.48	3169.87	4604.24	2453.33	2515.43	3056.42	8382.1	10630.7	10868.7	9248.72	8919.69	12163.3	2690.17	5416.97	3159.34	1902.27	775.958	1034.46
74.71405008_399.198929_[2][M]-__1	21375	17121.9	26628.6	3956.9	21113.4	22705.2	16078	16322.4	14324.9	15085.9	15982	12150.6	22063.6	21988.8	19173.4	13606.7	12772	12379.9	3847.75	4322.2	4066.74	2969.79	3354.25	3556.49	9964.21	11841.8	13703.7	11438.9	9835.37	14032.7	2664.12	5989.71	4021.36	1959.68	855.161	1289.5
74.83536906_977.9106992___21	14.5705	63.9561	34.5249	4.39973	30.6266	51.6378	108.182	67.7785	35.8236	23.8664	45.4295	91.1164	91.2859	52.1026	85.9667	9.72503	36.9534	42.8848	30.0468	16.355	24.9419	41.3862	30.5288	73.5701	99.1376	101.599	67.3825	54.1597	41.5026	70.3738	12.7227	171.76	71.71	137.049	23.8007	47.2174
74.92361766_399.2562265__[M+Cl]- 39.9489 [M+2Cl]2- 79.9126_1	9797.14	8364.71	12582	8614.47	8491	8836.39	6604.92	6797.65	5785.15	6981.76	5656.29	5176.01	9070.06	7729.03	8876.17	4834.43	5668.1	5790.65	1817.55	1885.96	2036.32	1178.88	1162.9	1379.4	3739.95	5998.47	4964.55	5359.85	5514.59	6377.54	1357.3	2286.1	1709.2	898.058	548.631	568.896
74.99324758_763.5955065___3601	29.0889	18.2568	11.6131	42.8157	55.9299	38.4532	34.8628	68.7613	49.5407	80.1095	52.7992	65.3896	28.1568	29.2496	37.6899	54.0778	83.4607	55.0952	54.7317	59.913	31.3777	45.1987	35.9406	51.4303	18.2556	23.8118	27.8273	52.6054	61.7462	52.2703	75.1992	67.5369	89.8522	55.6513	26.5857	43.7767
75.0103333_308.6094658__[M-H]- 76.0209 [M-H-CO]- 104.014_15	695.477	1125.93	726.521	203.744	285.077	240.274	170.309	109.947	116.132	128.024	157.401	113.29	328.19	471.462	428.586	184.462	231.141	151.587	98.2995	105.758	80.8991	110.826	89.6884	92.1441	763.037	847.697	699.318	207.579	144.691	217.202	143.668	116.171	98.258	187.667	103.18	109.346
75.09852817_493.0454279___4010	48.6013	64.3095	65.5057	84.8063	130.297	42.0205	34.9865	32.5508	28.2485	7.99463	18.9225	21.7338	10.1165	2.59765	2.28033	9.65854	6.47043	0.0207037	3.96808	6.96637	0.0189364	4.56749	0.0232272	5.05008	6.16578	21.0552	3.15433	11.208	10.8281	8.2817	3.14523	2.86706	5.88158	3.41748	23.8021	6.37579
75.13153166_399.2100609__[M+2Cl]2- 80.3309_1	2999.79	2706.62	3877.75	2328.95	2922.28	3363.88	1852.58	1933.36	1663.16	2179.8	2226.54	2053.32	3100.54	2482.57	2155.6	1706.02	1782.62	1681.29	375.351	591.481	798.574	464.32	550.921	527.289	1791.36	1940.83	1736.99	1926.21	1258.29	1831.32	426.942	707.754	572.298	340.885	214.199	193.126
75.27459251_956.0895205___8440	0.044486	54.7624	22.996	13.1896	39.3168	27.947	30.8647	43.0702	7.94263	39.8653	26.4945	64.9677	45.3857	93.7341	257.14	433.206	115.781	32.7941	201.576	11.8462	163.334	58.076	121.426	23.0917	62.0814	119.057	28.7592	33.9702	239.335	81.6596	18.9318	25.7776	47.495	71.6799	30.5682	74.8045
75.3423084_399.4956182___1	1052.3	1009.53	1252.4	889.398	896.724	1280.1	701.378	684.396	486.083	785.055	673.721	563.627	897.74	888.903	876.074	644.499	652.892	686.86	222.463	261.874	295.224	130.273	198.128	272.936	504.196	705.423	622.299	413.332	523.753	601.911	164.462	156.492	288.764	73.3796	67.99	107.168
75.43978325_734.8325004___4077	0.044486	9.13145	3.88095	0.0402612	17.5696	6.97547	11.6206	14.4728	4.05049	4.00855	11.2976	0.0396846	10.2591	10.6893	7.02726	7.38687	8.83211	6.90221	14.1883	9.43043	4.19523	2.32595	23.1611	5.16465	12.1874	17.8436	15.4535	24.8799	18.9849	30.4525	24.8159	47.5229	39.0557	44.7269	47.2211	78.9387
75.46633218_977.5582496___234	4.85079	83.2225	34.8871	8.78975	110.7	56.6006	188.109	215.599	60.4245	172.887	120.431	183.243	30.8406	65.0576	43.6976	41.2847	24.1676	40.998	164.161	18.6694	44.1208	53.4524	83.9194	104.334	160.719	97.4718	154.538	100.716	118.858	73.0693	22.2166	150.713	145.338	173.245	33.9643	64.9468
75.47913611_956.2261514___8430	9.70197	22.8177	15.3307	0.0402612	39.3168	24.4536	65.5875	74.8325	23.8279	23.885	45.3683	51.9741	43.7239	60.5409	165.556	386.395	77.1822	32.0344	64.3314	14.2154	110.851	88.1214	182.073	48.7491	79.7063	174.209	38.3457	48.1244	192.52	130.67	31.553	22.9134	44.5266	51.165	23.7752	32.5237
75.55355426_400.0775118__[M+2Cl]2- 81.174_1	495.502	587.502	543.723	468.221	599.516	592.092	415.021	484.878	233.313	416.586	307.236	420.848	373.861	515.732	407.551	334.558	276.836	243.807	129.447	110.777	125.544	76.3671	44.0558	122.734	270.61	351.763	312.925	329.085	270.078	303.866	112.639	182.655	112.797	63.6713	55.1386	75.7874
75.65245175_736.3367014___4078	9.82098	4.56572	3.8863	0.0402612	8.79622	0.0319682	19.418	7.2463	16.2248	20.0694	0.034555	8.72928	2.56424	2.67616	9.38028	12.3285	11.0384	4.6017	6.08093	7.08063	8.39059	6.97801	15.4372	0.0232341	6.17962	17.8285	12.5385	11.0686	16.2927	28.9603	27.9497	11.5555	20.4124	43.3661	38.4001	68.1483
75.68664857_955.8392991___8441	4.85647	41.1174	19.1634	4.40148	26.241	38.4736	46.3405	24.9442	15.9029	35.8274	15.1397	30.3538	33.496	49.6322	106.227	303.057	75.8425	18.3054	64.2895	4.67992	145.456	84.0799	86.638	148.922	55.6912	98.8246	22.3683	42.5045	127.502	53.5974	18.9494	14.3369	20.7993	30.7284	20.4018	48.3858
75.71517633_402.6478734_[2][M+1]-__1	364.525	210.732	264.047	334.691	337.167	274.763	226.163	207.906	186.37	243.115	242.921	202.069	176.853	207.957	222.839	125.848	174.348	164.081	48.0346	70.1051	75.8361	27.8503	48.7374	66.8258	149.93	207.192	138.153	117.103	100.232	86.9118	51.3634	84.1313	78.1475	56.0141	37.9636	25.7964
75.7547527_399.6734855__[M+Cl]- 40.7853_1	289.163	321.267	371.803	228.621	370.199	421.515	190.401	337.196	191.788	176.733	182.436	153.545	276.674	302.801	162.799	182.536	82.6637	148.333	77.1044	83.6798	89.1027	51.9216	59.7279	64.9587	203.106	194.151	282.686	224.154	161.84	202.998	48.6603	134.039	125.302	98.3579	20.7147	66.9368
75.87476465_971.6566443___5525	9.69072	63.8292	30.6506	4.39031	34.9172	38.357	73.2446	32.0332	15.8776	67.5601	45.386	38.9568	63.3268	36.8695	53.0675	54.0609	23.8584	33.493	46.3705	16.3358	120.775	57.2614	38.0376	84.8714	156.89	419.868	256.87	148.527	123.391	219.867	57.0629	426.098	91.5434	113.144	16.958	92.6281
75.90793032_400.3282295___1	207.189	175.174	239.924	168.202	229.468	198.283	171.804	150.314	112.161	116.433	203.345	92.3736	105.02	176.549	180.399	112.816	92.7754	144.641	49.5189	41.8883	52.5144	18.3652	40.363	31.5324	147.747	113.84	179.909	90.9941	79.8955	182.407	50.5988	63.5079	64.8624	27.4298	13.6458	3.18621
75.95550105_399.5874776__[M+Cl]- 40.9902_1	283.633	305.347	309.428	228.622	372.128	283.085	220.105	227.368	219.135	241.205	144.437	126.084	219.007	251.67	219.944	160.275	121.748	216.622	56.878	95.8801	63.7205	39.9551	59.2206	97.9727	165.427	235.926	177.24	157.756	141.462	243.398	71.674	90.9929	82.8288	68.887	35.0547	41.4207
76.05503056_399.2940695__[M-3H]3- 231.184_1	132.057	220.093	202.15	205.689	334.398	213.301	232.639	196.014	231.767	128.437	232.864	209.55	361.048	135.068	250	355.078	311.073	350.817	116.937	139.791	148.906	91.2168	89.1916	41.6366	177.425	155.592	231.066	204.488	126.658	319.79	82.1556	136.53	44.0706	21.0968	13.661	25.5228
76.08357402_973.4789562___5526	14.7009	36.8791	19.38	35.5695	39.7221	14.1049	62.373	28.7906	36.1324	60.2854	26.778	61.2864	55.6884	49.3606	28.4033	29.0806	34.6636	38.2057	9.96931	23.2901	37.2865	50.3497	35.4672	58.108	156.237	335.409	261.079	133.027	78.9727	179.526	38.5256	375.701	18.0843	72.9054	51.5237	70.5378
76.16972094_399.5787275___1	215.029	235.114	282.232	336.421	303.709	325.442	253.015	225.514	145.816	233.346	180.291	130.088	301.938	263.982	254.765	408.116	268.332	263.38	77.1871	145.883	152.861	92.499	128.577	84.5171	193.65	231.757	183.361	252.939	217.43	331.207	97.7828	117.636	80.8554	61.6413	47.7603	44.6069
76.27458783_399.6482996__[3M-H+Cl]2- 39.5354_1	134.156	199.806	302.719	243.319	133.421	249.693	191.104	200.929	162.304	220.117	142.497	121.834	196.482	220.051	221.793	217.955	190.173	278.496	109.232	77.2395	129.268	84.8615	79.242	78.1043	96.9812	171.137	104.124	87.6558	120.419	233.274	60.114	64.4504	82.2797	25.8099	13.6458	25.5334
76.29315286_973.7493939___5522	4.91471	31.9923	81.5253	40.1449	13.1226	42.4404	62.5641	114.372	44.2932	115.57	34.4823	34.7076	40.5816	46.8446	25.0907	43.709	19.522	22.5231	33.9597	18.6705	41.4819	48.1576	43.1518	27.8455	102.592	152.249	132.493	89.2262	65.4362	152.525	35.363	210.175	36.2887	52.2567	10.3206	80.2365
76.30547266_1069.586196___3559	39.3704	100.21	59.6714	13.1914	61.1279	59.3362	61.6642	46.8981	213.499	60.3873	71.0881	51.9954	48.1211	259.018	198.827	82.3189	36.8723	27.0222	161.219	18.6436	48.8287	131.151	96.8083	48.0508	62.8838	84.5065	44.4833	53.7929	35.5695	61.0905	68.031	38.0089	71.451	45.5394	41.6132	41.9415
76.37524234_399.9960288___1	288.282	295.533	297.211	161.852	313.342	259.315	162.329	119.333	94.9801	103.701	105.667	126.092	186.215	133.855	159.319	171.05	91.1189	128.013	35.7542	100.101	92.5908	42.1264	32.9869	70.8814	151.732	240.418	154.437	131.207	101.733	142.374	37.8775	82.1727	41.276	23.9716	23.8801	15.931
76.51471823_1069.254501___6169	14.5717	63.893	76.6945	26.4124	69.8771	34.9023	57.81	64.257	87.6118	63.744	56.6686	52.1117	38.2633	306.998	120.826	86.2908	36.8704	22.5666	158.281	16.3487	33.1661	62.6216	85.5933	73.355	71.4611	60.4932	25.4487	45.298	21.9334	41.7386	32.0637	40.3941	44.7071	38.5358	17.1603	61.4335
76.58185219_402.6660257___1	146.559	109.775	119.28	154.404	146.451	206.273	180.112	143.215	131.334	116.489	94.3739	121.359	169.323	122.728	177.795	83.565	93.5972	77.2835	36.0615	54.2325	45.8484	20.8197	64.1298	55.1144	90.4977	140.145	107.851	96.0164	75.5761	117.042	47.7682	63.9428	41.6443	38.0125	20.6441	28.9334
76.68349006_403.8648151___1	130.548	123.389	164.456	106.378	125.343	41.9412	42.9245	75.2074	68.1914	50.9968	41.5123	82.6192	155.871	129.465	116.378	83.7956	47.8238	58.1921	24.0344	25.7929	35.3414	18.4838	25.5609	22.9552	71.8095	85.0395	101.338	67.7553	40.9953	106.969	28.0309	28.9517	32.6746	17.2522	20.6157	25.6582
76.72419529_1043.150266___5683	4.86274	84.5876	84.3689	35.1944	30.6065	34.9439	46.3264	39.3163	55.7353	80.0216	45.4052	47.7685	59.1721	56.4439	34.7456	39.6979	28.8005	61.7157	77.5578	35.5172	27.3466	157.86	138.481	25.6457	68.2483	61.1963	57.2433	31.1037	33.3439	77.3439	25.6726	98.6003	74.2206	51.9432	44.5334	137.549
76.79416513_400.3262447___1	123.065	118.635	212.465	107.48	214.303	203.815	175.35	191.197	160.659	167.117	112.893	75.0229	255.075	247.898	149.395	117.954	75.3601	81.6713	75.7359	53.5491	67.5468	44.0276	69.4403	60.8998	107.613	133.216	147.725	143.642	122.259	118.78	104.118	107.725	78.9641	84.0919	27.5288	61.3086
76.89395931_400.6886065__[M-2H+K]- 39.9489 [3M-H+Cl]2- 39.9489_1	124.176	97.372	124.565	78.8023	138.748	137.545	148.88	120.461	101.264	210.06	125.787	133.336	103.714	190.268	106.979	106.417	89.1202	81.8017	35.5634	43.3491	66.8109	57.3389	57.3943	48.6792	263.414	169.18	140.056	242.388	170.34	149.373	110.963	149.042	109.613	46.0558	42.7116	124.173
77.00388341_399.4382294__[2M-2H+Na]- 28.0156 [3M+2Cl]2- 28.0156_1	135.424	97.6846	196.88	206.908	231.008	233.325	167.258	186.463	122.367	153.869	250.347	142.771	156.42	101.372	145.039	138.039	88.295	99.5551	87.2034	60.9228	86.117	81.7019	88.0961	44.8116	186.419	187.338	260.772	159.681	205.758	252.518	145.401	165.408	244.845	119.446	77.8215	50.2373
77.01655247_1093.566746__[M-H-C2H4]- 106.054_24	718.804	633.141	625.659	596.037	706.885	869.254	465.44	408.48	503.725	712.844	374.919	928.547	25.4273	23.495	32.0498	12.1532	8.69795	11.3001	14.0303	7.02164	10.4034	23.0065	27.9922	17.9364	296	349.819	319.075	240.782	314.836	323.27	277.974	240.25	289.264	276.249	313.796	293.512
77.02995176_478.0426495___2	204.9	223.915	293.127	61.9845	75.0122	119.783	38.9345	54.2318	48.4396	31.9965	41.7786	26.1245	113.816	99.1424	91.9595	39.1893	40.009	25.1904	12.0961	23.5548	20.9204	6.94525	10.2586	7.70005	238.79	484.518	397.968	53.3734	38.4035	63.8487	35.1155	43.8383	38.7466	6.92892	27.5782	25.827
77.04105963_638.4895564___6334	29.5536	36.9965	31.1728	4.44866	22.2155	7.0812	19.6126	7.28035	4.06214	4.0576	15.3041	13.1891	7.63418	10.5255	4.60833	0.0221872	6.61334	6.83967	8.02324	18.7548	4.15364	9.2074	0.0232272	7.74718	131.988	156.894	197.171	22.9304	19.3574	28.1212	6.46775	2.92585	27.1427	6.99153	13.8956	9.79321
77.09620128_401.0142424___1	83.9471	76.7856	124.49	112.134	116.077	131.208	114.132	104.881	64.4329	72.9189	103.578	90.5255	80.846	61.2542	99.7841	86.7606	39.3005	95.0796	22.1374	40.275	22.1028	24.2726	68.4653	51.2413	184.691	79.4568	211.383	204.528	131.17	127.298	91.9448	172.901	41.8549	34.718	55.2391	61.5817
77.11561949_399.507781___1	98.5948	83.5901	163.504	67.4109	132.212	126.414	122.094	73.1236	72.487	112.764	145.318	88.206	97.3502	143.686	66.304	66.5013	83.6281	69.9253	44.6781	53.4571	71.1043	52.7334	54.8701	53.2266	158.541	133.241	68.5388	79.7786	118.593	176.347	47.9182	63.5667	88.6837	43.0251	6.82289	15.931
77.21544859_399.6596538__[M-H]- 78.226_1	73.9461	111.938	115.964	135.641	71.3117	167.025	139.191	109.685	107.771	100.541	112.138	70.8446	116.671	70.2309	111.875	101.849	72.3699	35.1958	49.4546	27.8937	53.1743	21.0243	44.2089	37.9292	158.254	148.079	106.915	114.145	106.226	135.752	77.9925	74.8243	101.392	47.9853	58.6915	16.1235
77.23284127_475.0795477__[M-H-C4H8]- 134.313_2	210.454	139.579	223.336	44.3738	52.6221	109.132	23.3605	18.3595	28.7038	15.9962	11.406	8.73578	140.582	97.8467	98.0984	29.0285	51.9682	13.5524	7.95075	9.31983	8.25135	13.7197	10.1325	5.0607	12.3406	23.9763	30.4821	32.1923	21.6967	23.4626	6.30606	11.4865	8.83049	3.42099	10.218	6.38452
77.29990356_416.24046__[M-2H+Na]- 56.3369_6	137.33	131.476	120.455	83.7397	75.2871	67.149	87.7824	46.6473	56.1291	28.1759	61.1077	86.9196	52.7114	36.725	32.1822	37.6003	21.6121	27.1669	20.0165	29.0729	16.628	25.9444	15.3282	17.8533	40.4	84.167	63.4385	64.3162	36.931	63.8617	41.9654	57.4038	50.4185	34.4662	27.4594	44.9318
77.423417_400.0853313__[M-H]- 78.4269_1	210.624	116.097	248.55	210.705	276.793	223.301	189.662	130.627	105.599	144.15	133.852	137.745	160.524	160.872	202.315	203.964	155.881	238.802	65.142	83.8856	95.622	106.231	105.299	115.496	202.689	220.034	206.634	140.216	136.033	160.151	81.6852	95.9522	101.786	75.4648	34.4395	73.7455
77.43150756_478.3221437__[M-H-CH3]- 93.4619_2	137.749	87.3002	217.753	26.5979	30.8874	49.2317	31.1476	43.3949	28.299	7.99912	11.3942	17.4369	43.6357	73.7868	37.0498	34.8089	24.0859	16.0606	10.0792	7.07922	0.0189364	9.27698	5.13978	2.56713	15.4228	36.2733	22.4072	28.453	8.24463	16.8137	15.9899	14.5915	2.98601	27.767	17.2664	6.47006
77.63380328_401.9357656__[M-3H]3- 235.912_1	203.537	360.722	508.007	306.057	463.361	472.891	268.098	304.165	261.122	167.463	162.12	159.657	288.993	244.465	237.899	148.302	229.655	219.073	71.3262	106.919	99.5286	63.0581	73.4334	115.368	117.385	194.949	147.903	121.424	94.7694	161.411	69.6476	53.461	58.1123	48.4484	44.7298	32.1945
77.73149143_417.5714613___6	642.105	537.378	751.991	634	451.219	250.207	188.074	250.364	226.853	104.309	110.417	124.893	17.6845	18.1935	11.3924	7.26064	12.9311	13.5391	9.9182	4.64959	6.1823	11.4383	12.6601	12.6391	27.7236	44.8189	56.6548	16.819	21.6792	27.5708	12.6088	17.206	20.6014	37.6683	20.435	6.37146
77.84508033_405.4327296___7899	671.065	515.279	657.016	649.549	631.299	629.073	222.069	316.03	284.612	202.281	150.265	193.154	182.894	148.29	164.505	217.737	140.387	129.411	79.731	55.2395	59.9578	46.8857	66.3499	57.1131	106.56	176.884	115.815	72.2004	46.4706	139.237	54.0619	63.6938	68.0545	37.9548	41.2314	46.6541
77.95150411_696.2114602___9085	14.5391	13.7096	19.3599	0.0402612	0.0400679	0.0319682	0.0353867	7.24119	4.05188	4.01228	0.034555	0.0396846	5.1267	7.99707	0.0209605	4.92637	4.40975	4.59414	6.08178	2.35765	0.0189364	2.32607	7.71238	5.16118	3.06513	6.0015	15.4684	2.79001	2.72805	2.77721	15.7025	14.243	8.78587	3.36486	23.5924	9.63143
78.05690437_403.2865184__[2M-H]- 39.5354_1	253.472	154.546	244.319	399.8	362.845	209.752	154.926	167.803	133.488	123.158	98.2798	134.067	83.168	86.7984	82.8202	71.4582	69.9542	70.4025	20.013	44.6123	31.225	30.1226	25.5954	17.8811	111.766	127.191	82.7995	57.5229	42.4053	90.5855	60.5063	41.1295	53.5427	24.2244	51.6102	28.9334
78.15765816_695.9891198___9086	0.044486	0.0417716	3.87693	4.40382	0.0400679	3.50183	7.76171	0.0328174	12.1517	0.0365366	3.78522	0.0396846	2.56711	2.66934	0.0209605	2.49997	4.41594	2.30025	6.09222	7.17909	4.19496	4.65997	5.14898	2.58372	6.13811	9.01728	0.0290008	8.38127	5.46407	2.78116	6.29081	17.1143	8.79701	6.74067	0.0313307	19.2988
78.26690738_401.5816447___1	93.3956	144.017	218.7	179.29	155.855	134.043	109.766	100.135	60.2129	115.319	80.3475	91.5043	87.0286	78.1155	73.6322	53.8823	56.3363	54.7306	40.1009	32.8723	29.1415	13.8802	20.5114	40.9296	133.536	160.517	146.165	91.991	71.1618	121.16	41.3999	72.0338	68.8063	51.8349	54.3952	51.4381
78.37675758_400.0258007__[M+Cl]- 43.4101_1	49.4687	27.9097	65.724	71.0126	102.875	84.7218	65.0284	83.2145	60.4058	69.106	88.5409	100.575	58.2158	49.4844	65.7249	31.4907	34.3811	33.9114	35.7943	23.2715	30.8909	25.2208	22.8371	15.1884	99.6507	114.919	37.4483	69.487	67.9366	104.514	52.1082	112.636	55.8506	20.8308	23.8214	47.8497
78.47428485_400.0602114__[3M-H+Cl]2- 40.9902_1	103.525	74.3023	57.8559	143.15	193.524	149.189	92.6739	129.019	129.176	151.264	134.24	106.267	73.8986	81.0084	92.9426	64.4286	101.84	112.892	52.0776	60.5338	54.0931	77.9514	68.217	62.7515	94.8304	176.118	180.187	190.979	133.612	140.115	144.243	127.651	137.736	94.0993	50.1381	44.1055
78.58330842_399.0163587__[M+2Cl]2- 87.2241_1	48.7643	69.014	47.0468	31.5101	135.025	122.011	149.04	66.0542	69.5344	92.1786	101.053	35.4924	190.937	135.514	99.6617	223.72	80.2524	46.6687	94.6761	140.938	141.614	113.603	116.533	86.8887	209.177	138.264	95.2431	86.1679	138.89	59.3076	118.036	149.277	99.6113	34.2517	63.6469	34.0973
78.69174277_399.5057035___1	54.4125	37.2901	86.0954	35.9453	58.1479	152.603	90.7541	117.893	73.6246	123.4	120.428	105.965	151.444	119.82	117.013	165.821	124.084	86.6144	82.5148	53.08	41.2577	80.2481	35.3176	17.7199	114.421	161.883	187.209	153.494	123.876	163.6	82.184	84.0418	134.348	100.453	37.7968	66.0531
78.79442139_399.1194277__[M+2Cl]2- 87.659_1	19.7509	51.1787	62.7291	27.0087	114.666	132.548	111.623	69.5943	83.6592	40.0777	86.2725	48.8021	101.143	102.723	68.525	143.921	85.5757	77.0951	79.1903	60.9396	94.1944	28.767	96.2594	28.5292	85.5543	97.6779	53.9609	60.2601	59.6695	82.094	47.339	31.6208	103.04	39.5495	47.7527	31.8639
78.90366353_399.425254__[2M-H]- 39.9489 [M-H]- 79.9126_1	29.6268	51.0828	19.5728	35.9525	75.8984	60.549	85.6707	54.8427	57.0586	82.4069	95.1423	53.1335	78.2736	108.811	50.0125	103.353	54.6328	41.1144	57.9686	46.4894	71.4011	41.2696	34.8139	47.595	85.7773	110.161	87.0493	85.2033	86.7123	86.635	79.9718	77.2831	79.9551	51.9896	34.1145	31.8621
78.95883348_133.4995135___6834	134.943	170.7	577.784	490.519	732.507	596.571	148.689	527.861	185.545	898.262	861.205	887.896	1036.3	2073.86	0.0209605	575.765	0.0198348	372.224	1323.91	915.371	823.143	983.503	1284.27	941.121	637.891	1037	664.49	780.942	1051.03	1584.03	1284.73	904.53	944.316	791.042	779.591	1884.96
78.96096075_842.8420854___5758	155.89	187.71	162.904	158.809	252.976	195.935	586.88	602.539	578.879	172.828	237.628	164.975	735.448	997.563	1082.57	235.048	404.63	257.092	247.137	98.6697	130.455	111.773	106.111	89.7744	345.414	618.039	438.962	215.45	156.337	266.974	456.351	630.739	557.168	216.021	169.791	264.492
78.96084969_881.3943661___5322	150.78	178.725	182.195	123.887	166.917	207.191	293.856	267.698	327.143	124.008	144.422	108.313	1051.31	1225.26	1229.98	151.995	255.957	209.786	162.991	113.662	100.088	115.62	102.195	125.601	517.031	664.324	576.713	155.66	140.826	178.61	271.229	387.236	350.676	94.0832	102.122	144.862
78.96097677_789.8778659___7105	121.442	295.743	209.034	123.452	158.703	142.822	309.464	256.576	250.11	136.138	201.564	95.285	466.093	919.663	829.653	138.327	273.789	129.133	254.794	97.7213	97.5163	111.279	118.121	92.8714	285.151	401.485	392.224	148.672	154.872	150.337	211.431	350.464	213.79	108.5	151.355	213.837
79.03154839_1097.35285___24	3878.62	5319.35	3856.52	4165.14	3307.88	2479.68	3504.43	2627.41	2818.53	1830.28	3432.81	5089.65	120.095	69.0688	121.828	125.022	56.8644	97.6609	66.5116	77.6643	70.2317	75.2062	140.596	122.431	932.622	1718.68	1363.4	1301.74	1593.66	1460.2	1193.96	1359.33	1378.53	1286.18	1210.82	1520.09
79.1080593_399.109398__[M-H]- 80.1133_1	127.555	122.276	101.935	192.697	269.548	330.891	360.26	291.853	249.033	317.595	274.79	234.028	333.335	205.791	307.178	221.376	274.652	171.914	222.141	191.602	195.016	118.404	190.175	184.929	457.106	333.945	375.963	443.571	397.77	338.197	273.412	459.296	316.994	352.556	169.56	243.901
79.22848417_730.5531062___7579	0.044486	4.56008	3.87969	4.39702	17.5875	10.4783	15.5101	3.62047	24.2917	0.0365366	7.5331	17.4328	5.12979	13.3493	9.37604	12.31	8.83144	6.90074	4.05351	7.07341	8.38782	9.3053	10.2952	7.74418	12.1906	14.8833	12.3609	13.8482	5.42405	16.5922	15.5263	11.3898	11.6733	43.7367	38.7827	9.55245
79.32581175_399.5732996__[M-H]- 80.3309_1	97.5109	65.1231	113.304	370.429	314.848	309.267	283.865	215.856	200.776	279.343	251.023	161.02	316.918	482.836	301.971	257.284	265.228	301.911	213.589	150.4	181.981	143.761	150.576	174.831	585.87	586.058	722.087	376.735	337.313	226.579	272.672	339.172	351.783	289.729	224.401	242.108
79.45909939_762.0020349___3602	4.85349	0.0417716	11.6099	8.81245	13.2012	27.967	46.6416	36.1945	28.334	12.0306	18.8534	8.71883	30.7731	16.229	18.9237	12.4989	2.20769	23.9651	14.2159	4.79144	10.4748	65.6046	83.4205	90.29	6.08983	37.706	18.5444	19.376	93.2838	185.779	36.9535	63.5256	27.4414	145.043	126.325	517.841
79.53542871_399.9763523___1	81.4115	88.234	89.8619	99.0696	194.504	123.564	222.885	185.427	210.612	203.242	205.346	139.563	178.849	216.104	203.092	160.867	182.398	173.667	73.2155	172.587	124.556	85.4117	89.4834	120.556	791.442	776.968	740.241	244.683	237.182	203.623	299.839	264.855	283.961	219.263	79.2795	149.651
79.67599958_762.4438733___3603	4.84754	4.56429	0.0352303	8.80309	4.39441	10.502	49.4123	27.0779	16.193	16.0401	11.3143	0.0396846	28.1689	7.98979	21.2891	14.7714	8.83077	13.7201	8.1234	4.71992	2.09496	29.6258	55.7555	80.6265	21.3144	59.417	9.27409	24.9149	57.0391	188.456	44.9015	72.1462	32.1119	131.873	74.6751	645.547
79.75048767_399.8151668___256	39.4379	65.0145	128.35	31.3988	84.6826	113.179	106.522	69.4675	93.7392	87.9428	120.309	70.727	109.899	130.881	87.125	141.633	109.1	116.626	62.1414	91.3806	146.282	93.0174	92.8247	76.1341	364.923	348.62	305.191	192.96	104.968	94.1186	145.806	173.485	176.478	125.406	106.139	84.8411
79.89188612_762.4438733___3604	0.044486	9.12858	3.87582	4.40622	17.5776	10.502	23.2713	14.4967	15.4833	8.02004	0.034555	17.4621	15.3866	10.6713	11.8273	17.2631	8.83077	4.59191	8.1234	9.43984	8.37984	55.7397	22.1912	18.3171	18.2695	26.7885	9.27409	33.5325	43.1878	138.913	6.20111	29.3049	20.4349	97.2683	40.3606	230.158
79.95652731_128.0732831___8068	54.0821	46.1234	38.8387	53.3402	61.9706	45.8289	58.6989	21.7707	28.3274	32.318	49.6768	30.6601	909.903	753.8	570.275	205.77	223.662	266.334	104.91	124.119	0.0189364	459.678	130.804	587.451	115.844	74.4191	96.0183	48.3753	32.3871	85.0838	48.0611	32.0804	52.9258	58.9876	58.8816	73.1099
79.95951627_400.107904__[M+Cl]- 44.9887 [M+Cl]- 44.9887_1	54.2271	97.5218	66.5474	62.9168	129.252	143.806	96.327	109.685	102.681	105.327	124.994	84.128	106.005	123.621	121.794	94.3361	71.5459	74.6086	86.6581	69.0653	92.1667	75.5587	104.036	75.9421	156.454	210.937	154.623	202.257	107.563	146.258	69.7245	111.148	142.699	126.32	120.857	128.988
79.95893888_256.399831___8345	38.9667	45.7503	19.2399	35.4127	56.991	49.0294	34.854	36.5593	32.328	16.0433	34.0275	39.2278	60.3754	101.429	121.446	105.659	118.232	78.9387	73.2257	60.3091	61.6291	54.898	88.7085	60.5587	96.5748	51.2661	83.1912	77.2874	71.2131	94.3318	64.2183	49.5539	80.697	55.2843	76.0647	99.8197
80.06006481_398.0768926__[M-H]- 81.07 [M-H-C2H4]- 109.104_1	48.7643	50.5442	39.1325	62.9064	70.5672	49.1835	81.6878	62.3845	65.4428	96.076	60.6373	66.425	72.8047	59.0964	41.1116	88.9802	46.5828	86.5544	36.6658	55.1198	53.7728	29.3786	57.5031	55.3656	51.3689	47.8167	59.9184	44.6847	50.9269	49.6246	37.8741	28.715	46.2219	20.551	30.7008	25.4918
80.16740209_398.9597993__[M-H]- 81.174_1	59.156	46.4375	58.7014	85.37	106.966	203.553	194.873	114.025	97.9811	126.248	69.6799	66.4236	124.971	129.345	59.5785	84.5888	115.88	95.4301	53.033	65.2927	74.4157	38.4578	54.7228	55.7612	114.249	139.796	101.743	89.1105	73.7765	86.7674	78.013	63.3282	50.3576	47.8874	34.0691	54.1071
80.28280225_400.269719___257	39.5024	55.8198	50.9805	54.0289	58.0399	151.009	63.0161	109.679	51.1099	173.854	149.423	114.532	96.5828	121.278	58.7329	93.6915	76.3577	59.9535	41.7132	43.5643	101.627	52.7334	109.371	27.8148	69.3706	44.9079	44.1476	25.2704	43.3972	61.2304	12.6258	31.6258	20.638	17.1226	13.6458	15.931
80.32444572_986.9958215___3826	19.6429	41.5611	31.0097	13.3534	52.9936	17.6639	31.2173	21.6203	16.0916	16.0859	38.2532	21.9217	141.288	60.0577	231.965	33.9478	69.0955	29.235	119.126	23.32	46.7829	149.719	69.3779	45.5481	75.1629	118.923	29.1702	31.6711	24.8242	53.4957	22.3073	43.4817	48.2976	44.7567	27.5078	51.9788
80.38500668_399.9120858___1	69.0164	46.4389	70.462	157.401	133.709	248.749	171.695	133.504	91.78	100.088	129.699	44.2779	90.0442	99.085	110.661	140.733	86.8046	93.5478	63.8363	95.296	48.2663	65.6585	37.7943	87.5554	64.9575	171.47	41.4802	99.5482	91.5926	96.3789	69.9479	127.19	62.661	34.6597	26.4846	35.4717
80.39540261_482.5749412___4802	486.439	508.788	541.917	121.361	108.877	141.424	69.9948	18.0671	48.4235	32.1377	26.523	34.808	32.8482	46.7245	36.4473	9.6614	6.46725	9.00643	1.98475	4.64601	6.17247	2.28114	7.57935	12.6325	24.6524	35.8653	25.1853	38.2656	16.2394	27.5917	18.8647	14.3094	17.6222	23.8986	6.80118	19.119
80.52517117_1074.844771___3560	24.3681	54.9473	49.9208	22.0373	83.2384	59.5534	27.0763	64.3288	159.803	39.8846	37.9338	26.1138	22.9055	422.105	311.132	123.388	87.0586	27.1505	169.749	16.3882	76.0844	64.1972	90.7687	47.9658	34.2748	43.0908	35.0722	36.9431	39.0684	56.6697	22.4894	20.2861	35.8688	31.2112	30.9585	52.9765
80.5336653_987.312679___3846	9.83685	50.8757	27.1753	0.0402612	65.742	35.3831	35.1823	25.2614	23.624	40.2751	76.6284	21.9556	169.434	94.0322	160.042	26.7022	85.7894	39.6481	98.3809	9.33786	45.6087	154.312	58.3469	62.1628	50.1862	100.575	9.73941	34.6134	30.3856	98.3428	31.8992	14.5159	36.2879	55.1282	27.5547	35.7875
80.60228405_400.4096876__[M+Cl]- 45.632 [M-H]- 81.6117 [M-H-C2H4]- 109.636_1	24.5775	50.7048	35.12	119.817	102.174	161.067	105.128	89.4033	60.2723	127.248	102.758	22.0656	83.7595	94.1108	65.246	66.3472	37.0599	43.9547	24.0771	57.3785	55.6627	32.3876	25.6402	23.0232	130.642	115.131	63.626	42.4933	43.8543	69.5845	47.7721	81.1978	65.4467	48.3788	20.6466	25.7576
80.61315656_482.7020388___4796	606.649	572.643	562.114	109.47	111.284	179.001	54.3804	55.2222	56.4941	43.9215	30.2819	21.755	30.3214	28.5538	52.5236	21.7129	8.623	15.7613	3.9651	6.96901	6.17247	4.56227	7.57935	2.52378	12.3106	23.9102	15.7408	8.39557	24.359	11.0367	0.0290452	14.3094	11.7481	10.2422	0.0313307	9.55949
80.73557714_1074.854141___41	348.461	59.5262	46.6146	22.0726	56.9526	118.443	42.5485	50.0335	177.629	47.9251	34.1405	39.1707	30.5406	377.479	220.087	140.767	52.832	24.888	197.045	23.4118	98.6653	27.6203	134.71	135.036	56.0861	27.3384	31.8838	25.576	30.6966	27.9544	25.7449	51.5363	38.8579	38.147	37.8382	51.9752
80.75459966_987.694633___3827	4.91843	64.7508	27.1753	8.91719	114.999	31.8448	35.1823	28.8702	32.232	40.2751	111.752	8.78225	106.786	130.084	173.706	95.1678	61.1651	17.9908	113.238	11.6723	98.3112	153.576	105.087	73.3831	66.2258	109.732	29.2182	23.0756	55.2465	53.3861	31.8992	26.1285	39.3119	68.9103	30.999	48.8011
80.82066791_411.941172__[M-H-C4H8]- 137.898_154	1986.59	1774.45	2104.64	1935.24	1745.88	2358.56	729.399	840.307	997.058	491.062	363.834	353.347	166.998	177.244	130.54	85.701	71.964	77.421	32.1194	46.8757	41.6812	39.359	41.0569	30.7567	77.6767	195.016	114.632	59.6543	70.9334	124.527	28.7401	71.8963	50.7208	41.5277	27.6089	48.4017
80.96583721_1079.440419___6455	102.587	123.077	92.5512	70.7867	127.37	140.72	139.676	111.239	112.049	183.93	121.693	56.7351	108.934	905.416	205.695	209.695	221.345	90.6879	269.664	118.724	128.992	125.537	106.031	108.256	334.845	176.297	276.589	288.673	169.496	193.003	225.897	269.154	261.692	193.221	238.493	134.701
80.96225336_987.714297___3814	19.6429	87.74	58.1448	44.4443	147.882	38.8605	81.9455	56.932	68.3892	92.4951	177.3	70.1496	56.4116	161.096	115.986	122.913	83.5407	78.0565	157.326	51.304	149.044	155.301	90.0751	111.207	134.667	121.715	74.546	74.7322	98.8042	98.3971	47.7474	60.8743	149.846	55.0338	257.885	113.704
81.04740984_1094.999903__[M-2H]2- 164.108_24	4954.66	6545.44	5220.91	7759.07	6043.66	8574.85	4474.84	6159.16	4661.22	8668.7	6457.15	5203.06	86.6245	68.0553	94.4825	109.697	54.5207	88.3131	64.6094	70.3573	75.1248	66.8268	140.788	94.1178	2073.94	2900.18	1970.23	1962.18	2725.83	5428.33	1831.47	1903.2	182.489	2118	2874.8	3015.24
81.03490037_413.8852939__[M-H]- 82.0422_154	1484.56	1389.95	2023.64	1612.87	2717.8	2576.67	916.398	965.698	952.016	486.741	302.419	273.185	142.174	76.5789	99.9572	81.2812	85.7754	65.5898	48.3256	59.094	43.921	81.2824	74.548	79.8713	67.9504	170.758	70.6519	70.2108	124.064	167.293	216.384	92.0806	104.565	135.405	79.6557	84.4522
81.03655381_324.7920139__[M-H-CO2]- 126.036_23	397.006	493.618	474.415	206.553	324.063	188.686	315.422	286.056	300.252	259.625	224.707	218.578	97.0729	62.6032	77.7307	270.473	340.902	268.805	278.277	247.148	365.2	200.22	265.467	238.873	75.2848	190.688	66.8626	301.868	418.402	569.987	389.357	520.402	449.369	504.895	317.415	392.792
81.03614603_125.6187765___166	48.2566	45.446	64.5222	67.1277	283.262	45.1149	46.1652	58.3416	47.7262	31.779	54.7643	35.2887	0.0232039	0.0238966	356.233	0.0221872	152.236	262.568	121.637	0.0213417	0.0189364	363.97	15.141	152.537	36.9816	35.8257	15.7475	42.0202	27.0673	90.6897	53.5805	48.7847	50.0057	68.2832	61.3148	31.87
81.03687756_358.5946996___1767	43.4548	88.5347	42.8613	102.76	109.093	100.88	221.317	171.668	170.868	125.545	112.702	189.439	45.1765	49.0263	24.8407	115.282	115.976	71.6589	134.979	141.173	157.881	134.551	222.921	238.235	33.6472	38.6244	65.746	220.378	199.047	316.094	378.855	448.422	351.03	355.131	265.898	310.396
81.17958992_987.3800288___3813	34.0256	78.7571	85.4101	31.158	73.011	49.6203	86.126	39.6975	60.541	72.4961	91.9501	30.7904	50.7005	127.513	77.5895	87.0612	65.063	62.439	65.9894	11.6728	115.858	83.965	73.5145	106.365	86.7757	106.864	44.9061	66.2215	71.9419	90.0649	44.6147	49.3637	102.569	75.7421	30.999	55.4006
81.23397096_371.4239315___6398	0.044486	41.4118	19.3471	8.87605	17.6811	10.5585	3.89342	14.4677	20.1441	24.1144	30.3828	21.8888	7.61233	7.82325	20.587	7.28637	8.65372	9.06421	1.99284	4.67099	4.13185	0.0210019	7.62074	12.6805	15.4811	12.0051	6.34242	16.8983	2.72156	27.7041	15.8463	28.9206	11.8409	24.0195	6.85063	12.8143
81.25297183_412.9711109__[M-H]- 82.2618_154	920.618	786.697	1119.48	1015.57	930.787	1379.96	455.355	564.186	474.8	282.828	212.149	234.173	33.3295	105.796	55.4943	72.3473	26.2392	98.2408	24.1644	138.872	60.4104	79.8838	65.9795	117.861	96.9884	42.4452	22.3594	82.4798	41.264	98.9346	22.3963	32.0266	26.8888	13.8878	13.8279	6.46458
81.44560284_371.4239315___6399	14.6603	23.0065	34.8248	8.87605	4.42028	7.039	0.0353867	7.23385	8.05764	16.0763	22.7871	8.75551	12.6872	10.431	18.2995	7.28637	10.8171	4.5321	3.98568	9.34198	6.19777	6.89597	2.54025	10.1444	0.0283566	9.00384	9.51363	5.63277	19.0509	24.9337	12.6771	14.4251	5.92045	6.86273	10.276	9.61075
81.469184_412.3833091__[M-H]- 82.4778_154	188.959	444.646	430.678	306.052	495.616	456.095	192.871	271.407	235.182	117.292	156.842	127.404	43.5847	70.8568	59.7726	84.3218	19.4351	83.4948	45.8134	137.466	134.668	72.8866	89.1006	71.7429	31.3113	80.351	47.9127	54.0643	43.9039	81.097	28.7946	34.9401	20.9198	35.273	24.1983	16.1615
81.47219682_482.2746959___4817	63.5866	32.2906	58.0319	17.7615	17.6628	17.5875	27.289	25.3968	8.10186	20.0382	11.3962	4.36307	81.9	57.533	120.691	14.5308	6.48354	15.8219	1.98981	6.98715	6.19675	6.86846	12.6822	7.60072	24.7192	38.9521	28.4368	22.4731	29.8569	30.8903	6.31279	22.9812	26.5321	13.7067	17.0455	12.7795
81.5014801_123.8722858___7307	0.044486	0.0417716	3.85077	0.0402612	0.0400679	0.0319682	0.0353867	0.0328174	0.0365954	0.0365366	0.034555	0.0396846	0.0232039	2.61306	0.0209605	0.0221872	2.17409	0.0207037	101.94	116.743	109.442	114.72	0.0232272	0.0232341	0.0283566	3.01223	0.0290008	0.0257658	0.0249155	0.0253439	0.0290452	0.0264366	2.96446	0.0314148	0.0313307	0.0293344
81.58487527_1114.137596___71	24.343	41.1226	46.0559	13.2221	43.7165	27.9451	57.9821	25.0169	35.8688	51.853	26.5314	26.0439	17.7563	87.3473	61.2091	70.0007	26.0778	29.7888	50.0254	46.0574	51.9234	80.2268	82.3824	119.196	55.7275	48.9197	54.1169	59.212	35.5398	83.4978	25.4131	26.2814	35.717	34.3317	30.754	174.879
81.61350346_1048.735323___8891	34.4437	59.2651	42.2225	22.0161	43.685	52.354	34.7623	32.1194	67.6657	43.8328	68.0935	73.7579	50.705	62.469	77.7014	41.1792	30.3565	27.0303	40.0018	18.6628	16.599	61.9269	93.8701	37.9065	43.964	63.3123	57.314	56.5886	49.2949	52.7257	39.045	37.9632	26.7803	49.1269	54.7547	64.4823
81.68110493_414.0438861___154	131.495	116.221	155.948	147.549	244.573	208.842	105.588	101.461	73.4379	69.9835	49.2868	30.5135	70.6038	60.735	43.9347	46.5431	34.9933	37.7907	32.1638	47.0668	16.7052	31.8579	52.6937	39.1234	40.6334	42.4374	25.5121	34.0876	22.0026	33.5599	25.548	23.2522	30.5907	27.7288	27.6101	19.3636
81.66605822_373.6453874___6400	14.6609	36.8195	19.348	0.0402612	26.4796	7.04017	19.4649	3.61819	24.1377	8.03641	34.1896	8.75818	5.06624	15.6312	11.4243	9.70186	10.806	6.79089	0.0182778	0.0213417	6.19826	2.29579	17.7634	7.59851	6.19124	20.9748	12.6768	5.63281	10.8701	35.9635	15.8448	11.5379	14.7953	27.4579	30.8279	31.9824
81.6727244_481.8138096___4818	38.9664	18.3578	30.8539	26.5092	57.2137	63.1185	56.3044	46.9072	48.3459	35.9129	34.0875	21.7401	66.4912	49.5037	39.7011	2.44489	15.0739	11.4087	2.0088	2.35123	2.08544	4.62225	5.12122	5.11589	12.3103	35.8242	22.0355	13.9913	16.2188	44.1066	15.7269	8.58739	14.6843	30.7237	0.0313307	9.54567
81.71447665_411.3984037___8565	34.6601	18.6444	60.9004	44.9501	40.2977	35.7709	27.6328	36.1148	31.2992	12.186	38.5411	26.5969	15.1727	33.898	41.109	29.5615	26.9201	24.8864	47.9337	87.3907	120.219	43.581	27.3257	20.3146	15.4324	26.9122	12.6206	11.228	21.7022	30.3412	6.31031	11.4891	23.585	24.0029	3.41063	19.1288
81.80680579_1114.137596__[M-H]- 82.8147_71	38.8999	59.4016	61.334	22.0101	52.4598	132.61	38.6071	28.5555	181.585	124.623	30.3213	34.7255	5.07327	89.1527	127.618	184.393	83.922	42.8236	68.943	51.3933	108.864	60.3923	88.9871	141.496	158.729	40.0295	69.9198	75.5375	124.404	77.6633	57.1188	92.2311	32.6434	41.1535	71.6803	115.249
81.8351261_1071.978823___3551	29.6391	59.4946	66.206	40.2401	93.2281	67.429	48.1703	43.5078	40.4528	60.6914	38.4218	26.1225	40.6656	91.9519	30.2207	36.4972	30.4369	18.0785	34.045	14.0319	10.3918	18.3861	30.5122	22.8159	75.8826	57.7701	212.098	107.154	125.852	76.8447	52.2023	69.574	71.277	56.2284	34.9287	83.7822
81.88312813_414.0015563___154	73.0277	124.557	134.287	126.069	111.572	107.978	23.322	46.8152	72.4029	19.9785	60.9303	26.1532	28.2055	44.8049	30.0111	26.8136	54.5201	41.2153	6.03082	11.7774	6.26369	16.2289	20.5293	28.187	83.8818	54.5785	41.615	39.7677	30.2017	27.9742	35.1309	23.2467	26.8413	41.5927	17.2562	9.69846
81.93978278_123.7421993___7308	4.86243	13.7135	30.8061	4.39238	4.37731	17.4623	3.87144	3.58703	4.00199	7.99449	11.3309	4.33982	5.06736	26.1306	141.443	4.85228	10.84	2.26068	0.0182778	0.0213417	213.19	4.58881	10.1314	10.1531	12.4041	12.0141	9.5048	0.0257658	2.72333	5.53751	3.1699	2.88813	0.0271353	13.7349	6.83934	0.0293344
82.04002157_1099.004609___24	18335.4	11961	10350.6	8149.52	15250.5	18357.6	8327.05	9302.95	10060.5	17095.7	14461.1	14261	199.846	383.713	256.854	264.422	239.337	199.211	169.672	181.635	81.1919	251.166	470.198	107.817	4758.82	9417.09	3868.88	2898.61	9432.38	9725.58	10884.1	3150.89	4789.63	4101.07	6472.47	9580.4
82.03088345_235.752558___9451	107.3	195.505	138.616	98.7459	149.187	143.767	273.892	188.826	139.558	104.313	102.201	150.239	93.1436	116.93	78.5006	111.109	120.408	49.6777	108.775	62.6184	73.863	97.2417	121.744	114.683	48.8517	120.613	60.8262	65.3245	65.5143	160.583	161.745	254.768	173.258	79.4939	62.2111	141.807
82.10449679_402.1165326__[3M-H+Cl]2- 43.4101_1	58.9867	64.5126	50.0947	48.6382	94.993	127.578	98.0021	79.2099	118.515	94.6268	109.574	78.4323	51.1651	73.7376	66.8203	60.0236	50.2942	61.6298	24.0757	44.6124	18.7609	37.0138	25.6392	48.1365	118.013	92.3938	96.4427	45.3248	63.04	95.6807	79.1449	49.2939	83.8964	82.9358	55.052	38.5786
82.24739826_1114.262499___71	34.1345	59.4612	61.4921	17.6295	30.6467	45.4654	50.2512	21.4729	47.825	104.847	49.2726	21.7304	10.1592	70.6066	200.937	302.415	122.608	29.342	150.363	23.3899	183.563	29.8557	43.1814	91.1297	31.0049	42.2298	38.2002	33.8734	24.6045	52.612	45.8879	58.5052	47.5372	83.7088	13.685	67.6358
82.3152897_401.8234978___258	59.071	54.9981	124.615	83.2092	115.665	190.085	101.093	68.4939	52.236	60.6579	99.6194	47.9831	76.3793	47.366	46.083	42.7151	40.7788	41.1073	20.1244	28.2172	33.4058	25.5295	17.9756	25.6213	100.336	127.229	126.279	69.3786	85.4824	88.6127	70.1622	52.2707	53.5002	58.8297	24.1213	38.6335
82.31982706_123.7133055___7309	0.044486	0.0417716	0.0352303	0.0402612	0.0400679	0.0319682	0.0353867	0.0328174	0.0365954	0.0365366	0.034555	4.33982	0.0232039	0.0238966	0.0209605	0.0221872	0.0198348	115.079	0.0182778	0.0213417	0.0189364	116.745	134.179	139.283	0.0283566	0.0274813	6.33706	0.0257658	0.0249155	2.76875	0.0290452	0.0264366	0.0271353	0.0314148	3.42799	0.0293344
82.46024868_1114.284404___5298	34.5798	77.757	58.4011	31.2974	78.8059	55.9574	42.5778	58.0056	48.4982	68.8327	45.543	60.8451	27.9377	56.0572	177.798	280.036	106.954	63.9825	147.841	39.7628	155.376	55.117	81.9067	72.183	59.6775	78.4205	57.3895	36.6962	73.8253	84.6708	61.2118	49.7294	62.4704	80.0669	38.1229	74.0735
82.52562788_399.1265049__[M+Cl]- 47.5613_1	69.2523	107.209	35.2851	261.559	195.755	209.507	209.685	150.422	171.134	264.447	314.014	84.2946	227.962	409.938	290.399	396.343	322.993	323.715	404.667	310.829	385	308.514	358.825	378.757	227.31	289.436	275.264	295.135	264.819	219.068	295.71	278.216	291.711	161.301	129.194	213.819
82.67822483_1115.023855___5268	79.0393	32.4786	42.825	31.3597	35.5291	63.2341	27.4468	25.3707	36.4463	40.5529	42.2935	22.0431	7.61922	74.1819	98.5521	261.954	108.325	24.8274	86.5123	14.0338	81.9712	20.6729	40.6494	74.2027	40.8367	27.1437	45.2972	37.2191	51.9468	44.4241	51.6435	32.1801	54.2397	17.4076	17.3252	41.9209
82.74418219_399.0408184___259	54.315	65.2577	35.2851	58.5188	185.332	148.941	155.831	167.741	55.8288	157.064	173.886	136.914	283.458	279.236	309.424	362.878	321.936	365.246	370.317	395.643	381.494	334.839	319.235	213.865	196.916	184.595	228.216	195.333	286.011	201.806	203.272	287.999	223.482	166.218	144.177	176.249
82.89645692_763.5012014___3605	14.5444	22.8209	19.3574	26.4093	0.0400679	6.99178	34.9063	7.23831	28.2994	8.00917	11.3143	0.0396846	10.2559	18.6428	18.6364	7.38568	8.81751	18.3444	10.1397	14.1401	6.2761	23.2398	22.6054	48.8124	39.5939	26.8099	26.0735	24.9149	13.6546	16.7369	21.0949	28.4	24.6371	29.3323	26.5966	32.0104
82.95672018_398.6063329___260	64.1905	79.0943	48.9968	67.5217	69.3048	78.3563	155.66	76.92	77.5703	88.1709	180.783	48.8021	232.107	246.99	221.472	260.615	94.9196	202.039	123.797	215.572	212.532	182.397	174.949	255.857	204.234	132.016	143.522	92.8143	126.666	121.747	131.603	163.299	154.289	142.392	45.2803	95.8151
83.0180319_309.4457795__[M-H-CO]- 112.02_117	1297.32	1553.23	1387.79	618	827.066	742.135	527.113	448.827	345.047	378.168	228.276	269.257	1028.34	1196.07	1049.49	713.96	589.002	589.889	296.676	360.318	368.949	245.781	372.91	386.583	1094.82	1304.45	1085.29	401.605	301.311	495.836	198.57	331.811	270.41	284.809	221.12	414.365
83.01186673_127.7446319___8060	144.903	133.931	182.559	57.7852	53.0033	56.4047	82.8582	57.1472	60.5626	32.3617	45.7567	741.983	326.812	766.29	0.0209605	182.846	0.0198348	396.891	0.0182778	173.759	780.576	1142.64	678.984	592.602	43.8328	73.0309	86.704	19.2773	23.0317	88.8203	41.7489	32.0804	50.9024	58.2305	66.9796	52.5789
83.01929348_445.3533348___2759	405.114	382.721	358.191	191.808	447.624	315.516	462.419	207.41	428.221	409.874	597.015	415.183	131.72	81.7796	116.424	1374.54	1292.14	1122.76	316.165	280.383	102.468	357.329	298.065	389.292	330.948	512.393	412.219	432.027	338.218	495.07	327.768	411.27	383.976	465.104	330.887	321.15
83.0167205_495.5048594___4006	1058.61	1658.91	1561.69	705.418	455.951	633.135	333.221	297.597	458.462	470.534	368.879	630.21	258.886	176.972	249.957	67.4002	99.6095	115.632	113.408	200.517	151.79	111.881	116.748	313.301	1751.58	2520.75	1821.19	537.359	469.408	793.009	429.561	584.192	647.512	489.343	452.497	507.199
83.02051193_544.7756069__[M+Cl]- 48.0524_50	780.708	757.207	648.983	365.474	316.443	571.332	453.575	301.723	351.771	89.3363	308.9	236.717	240.529	229.643	93.604	125.196	148.263	91.0781	3.97388	172.467	0.0189364	119.13	59.5574	50.5229	466.124	585.083	627.43	292.243	184.113	392.097	217.527	377.357	331.414	237.967	298.994	185.12
83.02664227_1110.563166___14	9336.24	12059.8	9096.69	9304.63	12185.8	9606.93	10063.4	8154.68	9031.4	8167.31	9384.95	9593.67	1693.68	1870.15	1365.37	1353.18	1473.89	1616.87	1396.19	1074.47	1306.28	1784.37	2067.79	2077.21	4625.89	6959.55	5750.18	4424.18	9563.89	5335.67	5169.47	5039.72	4933.07	4752.13	4541.26	5452.41
83.02683572_474.4981028__[M-H-C6H8O6]- 260.07_2	1495.56	1647.44	1820.61	1040.35	1725.7	1300.5	1381.13	1138.16	1057.17	1331.86	1192.22	969.138	1239.17	1614.9	1453.42	1759.11	1440.95	1272.85	1085.01	871.971	996.885	1214.12	1207.69	1302.03	936.975	1115.96	759.979	647.715	504.966	725.189	437.082	416.849	535.207	649.177	491.849	539.374
83.01889942_637.6060882___6328	361.73	453.491	69.4884	70.4891	84.4932	238.426	225.219	69.4049	224.229	0.0365366	102.337	78.3911	149.409	0.0238966	54.8908	0.0221872	0.0198348	0.0207037	37.2496	86.9419	53.7241	2.30449	0.0232272	92.0633	542.586	954.863	809.515	194.205	116.489	287.028	145.239	235.964	333.649	195.196	193.967	137.95
83.05140481_983.8539131___9109	377.797	627.031	307.185	314.444	595.107	416.811	252.842	260.876	409.072	317.907	280.678	432.856	179.268	150.208	157.296	200.878	171.973	153.908	150.081	118.383	160.683	161.781	175.291	179.132	431.885	327.334	425.401	516.999	398.225	282.266	396.626	508.835	437.515	362.35	625.714	431.093
83.11515143_762.6818463___3606	19.4173	31.9929	19.3791	13.2384	8.80084	24.5046	31.0702	28.9934	24.2895	24.0601	22.6589	21.8276	7.70376	13.3392	9.33149	12.3308	8.83077	4.59191	10.1542	4.71992	12.5698	24.7684	28.2786	33.5561	24.3992	32.7963	15.4748	5.54427	2.73348	19.5477	9.30166	36.9113	17.5156	73.3785	23.288	63.4681
83.17438772_399.2924099___1	29.6268	74.4263	39.1343	35.9453	77.8582	64.1097	55.2416	43.9517	92.8514	68.9861	108.266	57.5672	76.2209	120.321	106.369	125.217	71.406	75.1393	112.122	86.2859	96.7081	96.4636	92.2843	97.2774	94.1736	138.295	63.068	110.949	105.141	82.6138	71.3772	100.272	58.9002	61.1272	27.2553	57.2899
83.17330957_476.5829051__[M+2Cl]2- 96.4029 [M-3H]3- 252.533_2	97.7537	154.974	127.398	40.3968	87.6347	53.4402	39.4965	43.3648	36.3217	27.7375	23.1226	22.0755	66.8806	36.8321	46.1947	24.16	32.7856	29.318	21.8369	6.97076	14.4236	15.9864	10.1196	20.2437	25.0343	30.5939	22.3674	76.3981	64.2289	46.8851	25.5387	20.8295	11.9222	38.1161	17.2417	29.0549
83.33876156_762.677663___3607	0.044486	31.9929	23.2289	4.40757	4.40042	13.9836	23.2709	32.5724	32.3421	16.0183	7.54286	21.7977	7.6919	15.9796	6.98866	2.46189	13.2263	9.17219	4.05586	4.71337	6.2761	23.2398	30.8082	20.6203	21.3198	44.6831	15.4568	11.0733	19.1164	11.1579	18.5821	14.1818	23.3253	33.3135	13.2983	19.2063
83.38012848_327.3414591___5952	58.5636	50.5491	19.3302	224.939	264.609	136.379	66.73	71.333	123.195	8.01903	60.4211	41.1525	10.2762	10.5829	9.25911	14.7688	15.338	13.7942	8.07037	7.00228	6.27973	9.31096	5.15395	15.4353	731.916	1290.1	807.962	1018.13	650.417	1606.16	285.777	634.91	371.193	217.945	82.8552	120.282
83.40514989_475.1669669__[M+Cl+NH3]- 31.4132 [M-H+NH3]- 67.3904_2	32571.7	28281	30362.7	15568.3	16845.8	19108.9	6840.09	7666.32	5501.76	5051.11	6532.81	4641.74	17419.3	17314.1	16848.9	13903.4	16502.4	15768.9	312.443	2599.57	4799.14	1995.26	3092.47	2301.35	6695.33	9393.34	10606	20199.4	19610.2	21831.4	6341.86	12131.7	7660.23	3917.17	2954.79	2828.64
83.38857162_401.6996474__[M-3H]3- 253.179_1	34.1047	22.9414	19.3076	68.3108	74.8586	53.3272	66.0701	43.3071	88.5983	36.4504	30.6982	61.1412	79.5372	37.9322	59.9704	33.4279	45.8484	94.1953	18.1434	54.1679	56.8424	50.9117	37.0781	30.421	49.9953	51.8985	102.267	86.395	56.9122	82.0428	82.469	78.5344	59.6772	69.4368	27.611	61.2665
83.55595872_762.6818463___3608	29.0889	9.14082	11.6144	13.2227	17.6017	20.9753	27.1493	28.9532	20.2138	28.0321	7.54286	13.0786	12.8198	15.9796	23.2955	19.6951	8.81751	6.87914	10.1397	16.4968	4.18407	13.9439	15.4041	15.4652	30.4569	20.8521	12.3654	27.6833	8.19275	19.5264	15.4851	14.1818	23.3253	33.3135	6.64916	16.0052
83.60033948_327.2638618___5953	63.4439	32.1676	23.5819	168.655	225.646	237.57	117.636	84.619	106.997	51.6172	45.2865	35.017	23.1215	26.4572	20.833	9.84588	24.1026	16.0933	4.03519	14.0046	16.7459	11.6387	2.57697	10.2902	736.871	1453.66	1125.28	755.854	839.658	1617.77	234.983	502.275	307.025	153.878	85.1852	29.177
83.62332788_475.1154357__[M-H]- 84.6282 [M-3H]3- 253.888_2	32828.2	22244.1	28466.4	10807.6	14052.4	18302.8	6032.54	5980.29	6206.18	3675.97	4110.32	6024.48	14937.1	17401.3	17220.2	13206.4	16779.6	12689.5	2270.07	3044.05	4040.86	1444.42	1671.57	2392.46	8843.16	9161.04	10646.7	19062.4	19077.2	23185.2	6533.99	11991.7	8790.34	4349.78	2710.15	3596.51
83.75922678_762.677663___3609	19.3443	22.7936	3.86605	21.9802	26.3345	13.9661	27.1159	28.9188	20.1863	15.9997	11.2983	13.0619	7.68243	10.7952	18.8569	9.9767	8.92934	4.64466	12.1676	9.545	12.7081	11.767	12.8367	10.4409	21.2632	29.6997	18.5248	8.29362	8.18063	22.2805	9.28081	8.49132	8.73581	39.8921	26.5611	15.9775
83.82469203_403.6045667___261	43.8497	55.0591	61.7875	91.3633	158.609	138.291	85.4783	123.87	68.9612	76.5753	106.741	73.7555	701.614	416.188	484.053	63.8101	241.961	280.212	60.4759	58.9782	56.7877	55.8722	59.1608	73.5633	99.9952	270.465	158.811	135.964	67.1941	74.4836	63.9852	64.4982	65.7513	55.2188	48.3968	32.2962
83.81776842_327.3414591___5954	29.2818	13.7861	42.5265	90.608	163.978	95.9514	62.231	28.9271	70.9051	31.6229	40.4206	30.6399	15.4143	15.8743	13.8887	2.46147	15.338	9.19616	8.07037	7.00228	10.4662	2.32774	7.73092	5.14509	380.56	845.482	452.503	558.269	373.037	844.364	207.943	418.956	175.058	161.046	13.9	28.8191
83.84225689_475.1154357_[3][M]-_[M-H-C5H8O4]- 216.901 [M-H-C6H10O5]- 246.91_2	14802.8	12754.5	15002.5	7709.81	8673.19	7874.13	3615.17	3138.4	2913.85	2691.42	2916.89	2738.19	7732.65	9578.98	7634.34	7755.11	8448.82	7139.1	1761.58	1918.52	3025.97	655.256	1188.65	1458.5	3657.1	3702.33	5574.37	11455.1	11142.2	11926.7	3713.94	5142.74	3863.65	1647.3	1426.6	1612.81
83.93297243_1091.139926___24	314.677	452.298	249.594	281.866	358.97	283.214	350.978	279.484	319.858	320.109	369.644	285.465	1771.27	1275.09	1273.05	1187.01	1680.83	1080.88	1069.21	1061.29	954.867	1078.8	1074.05	1181.91	385.635	264.639	410.968	317.526	315.245	304.977	332.444	500.605	324.526	425.14	309.902	368.899
83.94729519_1203.52507___243	0.044486	0.0417716	0.0352303	0.0402612	0.0400679	0.0319682	0.0353867	0.0328174	0.0365954	0.0365366	0.034555	0.0396846	0.0232039	35.5331	0.0209605	9.93828	4.21264	15.3678	17.4713	27.1962	16.7331	0.0210019	24.6672	14.7945	0.0283566	0.0274813	0.0290008	0.0257658	0.0249155	0.0253439	0.0290452	0.0264366	0.0271353	0.0314148	0.0313307	0.0293344
83.95077172_126.8621989___8069	34.2043	22.9785	27.0854	13.2911	30.8091	52.7004	15.5594	28.8695	16.0875	24.0966	18.9922	48.0242	55.1956	219.465	0.0209605	165.591	0.0198348	138.606	424.216	395.069	0.0189364	457.824	163.164	159.542	37.4399	24.1889	38.296	11.3468	10.9623	8.35918	15.9725	5.81547	11.9406	17.294	6.78939	9.68571
84.03742448_326.3392344___5942	29.2818	68.9306	100.517	48.7682	101.012	123.727	73.8993	65.6987	52.3218	52.1859	53.1699	61.1955	30.8287	44.9773	81.0172	46.7679	47.2953	36.7846	46.4047	32.738	46.0514	48.8825	33.5006	25.7255	205.97	395.961	393.744	291.621	198.71	410.913	85.6815	169.461	135.051	80.0006	48.5426	75.5609
84.06010463_475.2036927___2	4909.91	4620.79	5206.67	3423.13	3116.16	2669.39	1016.73	1673.07	1108.4	1103.79	1245.23	869.997	3333.93	3554.18	3451.27	1960.65	294.255	3275.29	618.983	412.83	679.189	266.847	477.2	485.075	1893.24	1923.79	1848.27	4459.84	2392.76	4384.29	1539.24	2545.18	1691.81	728.795	528.613	720.531
84.04786663_403.6618063___1	24.3904	59.7195	34.7988	142.187	172.778	235.616	100.247	132.848	133.06	123.171	87.3182	69.955	623.228	439.196	598.06	259.523	267.004	265.84	62.0439	135.627	115.42	48.5284	70.2494	86.922	210.86	181.271	83.8207	64.8537	96.9672	142.537	67.9034	84.5999	86.1861	78.7024	51.2216	66.9954
84.15253113_414.8564302__[M-2H+Na]- 63.1839_154	166.098	214.864	239.069	181.07	268.329	108.107	46.644	28.8094	75.8266	28.0005	41.7529	13.0917	90.7081	44.6153	20.8117	35.5522	19.6833	36.6484	18.1217	21.1993	12.5487	18.5776	12.8516	60.5117	40.0837	51.5464	46.0063	39.7677	38.5037	36.3665	31.9371	23.2468	17.8942	20.5479	10.3537	19.3969
84.2566934_326.4232317___5955	9.76101	22.9769	34.7944	48.756	86.1768	56.2512	31.165	25.3112	20.1238	0.0365366	15.1909	4.37123	12.8453	13.0586	9.1423	17.0096	15.1439	11.3474	3.9781	2.33093	4.12731	9.19357	5.08896	7.61827	95.7585	73.8293	97.922	75.2092	78.8102	145.017	16.0857	52.5016	34.0213	34.9033	27.7439	22.4013
84.27973369_475.1154357_[4][M]-__2	1752.23	1245.2	1728.47	910.388	869.329	1165.92	440.848	452.732	439.655	270.99	286.814	291.904	1253.52	1256.3	907.614	849.455	913.235	666.725	206.347	166.837	268.594	134.132	270.283	204.173	462.201	692.546	481.017	1216.75	1039.61	1605.06	409.01	604.333	517.292	302.189	184.952	241.011
84.26772365_404.5114974___7931	72.9929	285.423	466.95	133.939	355.095	321.948	121.438	109.793	143.775	47.9591	72.0445	56.7656	370.21	311.512	311.159	168.679	164.605	139.888	49.1734	58.6866	71.7882	48.1259	66.9629	28.1889	80.0846	177.558	91.1994	75.783	88.1825	107.488	50.4879	77.5933	64.8506	51.3683	51.1546	35.0499
84.48197303_405.8501179___7900	232.878	137.227	145.8	91.4158	150.208	156.158	46.5668	98.6038	68.3919	87.9149	71.9705	38.4743	167.37	151.554	157.412	66.0868	53.8046	87.3153	43.6262	53.4608	51.2983	25.1661	58.2102	37.8882	36.9045	108.224	67.6914	56.0691	37.8874	88.1415	44.1257	37.3035	72.9979	65.5665	17.0312	25.4634
84.47457867_326.4232317___5956	9.76101	0.0417716	11.5832	44.3237	52.1854	56.2512	19.452	25.3119	20.1224	0.0365366	22.7864	0.0396846	12.6794	10.4339	2.28255	7.27979	10.8035	11.3474	7.9562	0.0213417	0.0189364	9.18145	2.54122	2.53549	12.5466	79.4581	22.2294	31.3736	31.8281	70.9864	12.8686	14.6271	26.9776	17.3904	6.93598	3.19573
84.49651894_475.2851653__[M-H-C5H8O4]- 217.555 [M-H-C6H10O5]- 247.561_2	416.069	633.482	605.158	356.665	277.033	434.886	179.518	165.762	205.675	158.846	131.296	140.087	363.062	373.992	352.156	286.558	415.738	285.702	59.0383	85.2434	117.169	55.2633	68.2968	69.8735	170.685	259.531	113.729	477.822	349.188	418.5	186.252	185.056	204.845	131.551	60.2672	82.6372
84.70716126_475.9561198__[M-H]- 85.7161_2	307.175	241.295	312.533	149.587	128.206	176.985	119.701	83.8473	106.041	56.1476	85.2815	99.8665	168.971	82.8113	162.572	191.283	147.544	179.327	25.9552	50.4634	37.5474	38.8707	43.072	15.2034	147.061	124.743	126.733	277.537	48.9464	212.091	94.7338	154.129	96.1655	78.0144	37.4627	28.7379
84.69441561_322.2937153___2295	44.3988	27.8663	46.8703	53.5285	137.641	119.599	35.3836	47.522	40.6757	24.3482	11.5124	4.41992	20.1987	20.7993	13.6523	4.83813	10.7743	9.04643	3.96894	11.6272	6.17096	6.86462	5.0652	2.52676	9.2418	39.2812	53.9736	22.4395	18.9172	43.0467	18.9748	20.1408	20.6355	6.83836	13.6403	6.36814
84.71543722_404.7094405___7901	29.2324	45.8824	30.8955	22.1557	74.4276	73.7444	19.4267	32.5015	12.0812	15.9864	45.5018	8.73317	82.5125	60.1645	89.3085	41.7319	34.5088	38.4774	30.546	14.1547	39.7372	25.5718	7.71632	20.5348	58.5642	73.6248	40.9834	19.6474	46.1151	63.4201	50.4879	34.4859	29.4776	44.5192	34.1031	28.6772
84.85555514_475.8796338_[3][M+1]-__2	184.863	144.086	143.91	78.2465	117.128	94.5904	55.4063	32.5649	45.2058	4.05652	34.7648	39.8943	62.5076	134.668	79.6859	79.0104	81.4593	72.9065	33.7897	34.8977	21.019	0.0210019	22.8029	15.1828	59.4011	101.436	117.465	161.805	132.812	212.8	48.0648	70.6134	78.4296	37.6425	10.2171	12.7525
84.90140663_382.0608748___12	112.457	76.4924	107.342	4.44929	13.2841	24.6871	3.90105	7.26326	16.151	24.1422	15.2252	21.939	12.6885	19.4801	13.7452	14.3666	15.1809	4.53843	11.7849	2.30152	16.5553	4.52794	5.09431	2.54056	30.9842	15.0071	25.3739	11.2837	13.6177	24.946	15.8678	14.4376	5.92359	17.188	10.286	3.20511
84.9104341_324.1301314___2296	64.2421	51.2664	78.4105	96.4791	75.7987	78.3152	63.012	47.009	52.3149	16.2577	30.7531	17.7055	30.3211	20.8412	29.6407	26.6681	34.541	33.9216	19.8649	20.953	20.6122	16.0502	20.3027	20.2602	52.4972	59.709	43.4587	30.891	35.2084	88.2902	18.9958	23.0486	41.2705	44.5023	10.2427	15.9389
84.9183299_403.4580658__[M+Cl]- 49.9463_1	24.3089	114.457	57.8635	35.4081	87.829	108.632	50.3976	57.6528	36.1623	51.9007	64.3218	43.6125	78.5185	76.1054	113.751	97.0125	59.7315	43.4623	52.4687	48.1564	50.2032	23.2072	41.0743	28.1881	70.8175	82.5552	58.0719	67.5925	76.7521	97.8016	40.0686	73.2832	74.4698	72.6732	41.3457	38.6318
85.00480893_475.2694148__[M+Cl]- 50.0381_2	304.374	540.912	394.711	199.193	317.322	496.673	262.719	159.819	163.226	161.284	378.034	133.97	207.575	195.488	199.749	225.079	224.427	144.658	125.312	108.923	118.448	79.5954	119.828	136.178	109.737	98.9325	128.056	143.216	191.825	202.024	115.31	116.644	68.3699	99.5462	88.5559	60.6908
85.0309738_299.7472016_[5][M]-__38	31142.6	36993.1	32072.7	9160.27	21481	11330.2	5985.52	5792.75	6195.39	6204.49	5834.76	5828.64	42353	45400.8	77597.7	16370.8	20472.5	20883.6	8690.29	8671.03	9909.67	5158.96	6366.57	5980.84	31161.2	36042.9	32712.2	13284.4	11251.6	19147.8	5512.32	7558.89	5806.11	7171.26	5019.7	6066.82
85.02719881_132.1782659___6798	892.726	808.413	2909.8	3029.54	5020.23	3677.45	4808.5	4285.99	4707.51	3987.32	4128.16	5406.56	9594.95	8653.14	8067.37	5481.67	3085.92	3331.49	2278.96	2017.67	2598.53	2155.47	2609.16	2269.51	3961.89	9520.06	5379.03	2108.58	1808.61	3518.55	2199.91	2765.13	2396.19	2166.91	1705.25	1916.45
85.03082983_267.9638343_[6][M]-_[M-H-CO2]- 130.029_39	35194.8	41727.5	37936.4	5905.36	7650.65	7044.18	3440.87	3029.95	3009.7	2481.3	2743.66	2519.02	74507.9	80488	26403.3	6314.31	7643.96	7577.45	2915.97	2781.95	3218.55	1633.9	2234.45	1962.32	38810.3	48254.9	43973.3	4672.12	3941.09	7332.78	1978.12	2718.82	2083.48	2532.25	1558.16	2147.79
85.03064975_226.8280838___99	8970.02	12314.6	9214.54	2796.34	3754.43	2996.81	1923.01	1930.1	1678.18	1759.39	1803.09	1736.61	9863.33	11167.6	10252.4	2209.29	2415.57	2448.63	1025.5	965.29	1010.55	672.261	826.823	796.309	11674	14946.2	12767.4	2648.38	2013.31	3696.81	1347.93	1910.91	1611.76	1298.85	947.619	1212.56
85.03078048_433.9475108__[M-H]- 86.0362_9	6335.58	8776.27	7138.51	1868.55	2760.74	2358.53	1793.44	1723.76	1435.68	1578	1621.09	1380.91	635.439	695.519	703.262	696.094	639.034	677.699	348.618	355.982	397.726	317.839	384.613	374.751	9484.3	12118.7	10592.9	3535.92	3096.1	5220.8	2754.18	3414.55	3304.71	3429.23	1764.28	2117.14
85.03096842_370.0694463__[M-H-CO]- 114.035_4	3800.7	4879.84	4464.8	2525.05	3481.85	3373.21	2948.15	2765.07	2669.76	2632.01	2491.54	2363.13	2024.01	2273.78	2296.44	3975.3	4221.35	3776.69	1833.26	1775.99	1908.11	1313.92	1580.36	1650.22	12402.7	15222	13787.2	3582.39	3204.78	5006.15	2669.22	3209.91	2779.61	2309.31	1980.67	2354.04
85.03082845_496.8854019___48	15556.1	19330.3	17232.2	3964.89	5358.33	4765.7	2453.65	2108.12	2205.53	2246.61	2415.01	2051.36	1142.46	1356.73	1450.22	556.902	565.34	491.67	415.969	369.726	494.102	353.778	412.528	329.345	33845.9	45978.1	35916.2	4476.29	3766.79	5911.52	1922.06	3027.4	2552.81	1897.79	1355.67	1833.66
85.13266872_401.2074842___1	34.3645	87.8543	53.8963	48.5901	124.063	88.4806	90.0387	75.5371	68.1766	88.8391	93.9949	52.2334	177.737	189.153	142.43	114.549	84.2383	66.6252	55.8569	72.8886	74.6702	50.382	51.1266	43.3679	142.719	113.716	63.5253	79.2107	88.5155	114.599	84.5607	76.8514	78.6047	104.541	48.1058	73.9423
85.12519516_379.0189693___8	128.834	173.285	180.751	13.3092	30.9029	28.5361	23.6694	25.3009	20.1208	16.282	38.4933	13.1245	32.9017	13.0138	15.9902	16.9421	28.1056	15.844	3.97121	13.9584	6.19044	9.16904	7.61591	7.59875	131.644	133.338	91.7588	33.7553	46.176	82.9399	41.1331	28.793	23.6298	34.2737	30.7738	22.3811
85.1457091_475.0440187___2	171.618	203.556	255.725	83.3161	132.47	70.4938	46.7911	72.3473	57.4076	32.6635	79.1999	0.0396846	67.5559	119.602	95.3706	73.3625	134.198	97.911	23.7481	27.9198	28.8797	13.7197	25.3313	26.4707	102.37	207.902	255.482	121.208	120.174	138.082	6.30606	104.032	77.7512	30.7889	30.1647	19.1286
85.17614836_306.8855429___15	165.329	141.884	141.977	39.7781	26.3396	31.5155	34.8681	28.8327	16.0329	24.0588	18.8953	26.1621	113.861	152.882	368.072	58.7673	48.0888	41.2257	12.0681	23.5369	45.8809	23.1716	17.9644	30.6665	199.444	228.773	219.381	94.0003	43.7124	155.954	22.3873	37.825	35.7931	41.4609	31.013	35.4236
85.17594899_270.4971254___3482	73.2963	123.803	111.814	31.0319	30.7356	35.1603	11.6589	3.61129	8.00057	24.4274	26.5555	21.8211	183.497	181.113	132.784	41.1416	45.2508	42.9463	13.8888	11.6215	24.7136	9.17004	7.5987	22.7426	270.912	393.024	258.383	62.5476	27.4156	86.6119	16.0691	32.1216	38.9283	24.2273	20.7688	22.5751
85.18933923_481.5145613___4794	224.162	181.016	226.52	115.319	100.326	111.416	54.3249	46.8707	57.2629	38.174	34.0126	26.0511	65.5625	90.5271	76.5671	95.6046	94.394	46.902	31.6562	27.7878	34.2633	20.4905	30.25	22.6895	175.483	250.36	169.633	146.294	100.236	135.308	54.0543	54.2915	52.7497	13.629	40.5169	34.9422
85.27335128_475.5812613_[4][M+1]-__2	126.658	115.273	140.302	44.4487	62.3865	70.9028	29.7458	43.4787	40.4619	40.0398	30.4533	39.8943	92.0247	37.554	59.6942	36.77	62.523	64.7166	21.8639	32.3769	18.3812	6.86854	12.6854	10.1227	71.2941	159.004	39.9298	134.27	105.683	151.449	6.31441	73.2057	53.0551	30.8391	6.82051	12.4447
85.32099893_125.6863635___8931	4.84139	0.0417716	0.0352303	13.1761	13.0761	0.0319682	3.85415	7.31786	3.98408	11.9382	15.0413	12.9621	0.0232039	7.8042	120.597	4.83097	4.31722	0.0207037	201.4	122.978	106.414	0.0210019	0.0232272	2.52638	6.17429	14.9274	9.46438	0.0257658	2.70673	2.75698	3.1569	2.86969	5.90116	6.83723	0.0313307	3.187
85.34668422_476.8234443__[M-H+NaCOOH]- 18.3554_2	222.408	114.41	153.233	87.3992	74.6093	77.6363	34.8898	46.7206	48.1601	28.1506	37.7684	43.3498	66.9809	75.2064	96.4995	66.0567	77.703	66.051	11.9873	21.0697	28.3963	6.90429	7.63657	15.2585	145.595	160.571	161.813	60.0086	76.9041	99.7284	22.1836	17.3066	14.7958	27.5181	13.7079	30.0322
85.3503743_410.9423955___8566	73.4683	46.1295	27.2157	44.5592	88.4744	49.4133	62.4988	54.4239	44.5329	48.2638	91.5167	52.7183	126.19	59.5894	112.808	86.2698	73.71	44.9756	70.3774	48.5907	48.4581	34.18	35.2985	76.6384	68.826	118.857	79.1808	99.8866	92.7128	66.1105	53.9315	84.4358	77.0323	24.0951	32.3942	76.9064
85.35371916_327.5542565___5935	73.6319	50.4996	65.6412	26.6009	66.0544	49.2306	15.5577	50.5604	68.3402	28.1001	3.79785	21.8555	41.5718	31.7487	37.0364	27.0762	41.6318	41.2405	18.1583	33.1015	27.2122	25.6051	20.6158	20.5804	53.3149	69.9453	54.3059	25.6694	24.7653	39.2777	19.299	8.77659	32.4449	20.8697	17.3367	12.9675
85.49735544_123.427399___7310	4.87611	9.13843	7.7232	13.2086	13.1755	3.50405	19.4134	14.3517	8.00399	4.00922	11.3309	0.0396846	142.357	5.24152	0.0209605	0.0221872	0.0198348	0.0207037	105.685	118.79	0.0189364	119.034	5.0776	129.452	12.4396	39.159	9.50559	5.65465	0.0249155	11.1056	3.17017	2.89611	5.9453	6.88677	0.0313307	6.43128
85.51654025_475.5469107___2	68.4927	79.4845	148.059	41.7525	13.5363	54.5978	27.6484	32.5649	40.4069	24.3391	30.8444	0.0396846	27.8422	45.5336	50.9102	40.6611	59.8154	29.3466	13.9134	2.32651	8.25276	11.4326	20.2692	10.1227	132.026	150.617	93.8904	72.9722	70.4863	91.74	18.9173	39.5564	14.7178	6.8441	20.4342	15.9406
85.56732241_413.7513329___154	73.8784	51.003	92.6678	137.722	137.847	149.789	112.658	115.609	80.3694	92.9579	73.3777	52.3089	99.6603	66.8218	62.3286	98.2007	41.2324	41.1711	18.0653	37.6281	61.8566	23.1509	58.9272	33.312	57.0269	154.586	124.798	99.3086	90.1892	111.169	41.452	52.0126	78.3826	93.7136	37.9053	59.3855
85.58161915_378.7251943___8	133.721	150.729	113.166	8.88477	22.4044	21.4443	19.7629	25.3329	44.322	36.7073	57.8545	48.2592	20.253	26.0482	13.277	24.2659	17.291	11.3163	9.9394	4.66491	16.5076	11.4788	22.847	20.2632	52.5243	41.9288	67.5701	11.2673	24.4415	38.707	28.5151	37.4902	35.4928	37.751	17.1201	22.3827
85.56959629_326.4434791___5935	120.2	111.593	79.1832	49.2047	75.6735	67.4186	23.554	54.7447	44.6808	16.2051	38.3151	22.0632	94.5093	125.181	111.371	77.805	77.311	47.7905	31.7176	39.489	39.0816	22.8802	25.3241	32.8538	107.339	147.779	221.948	59.133	59.4559	90.9494	41.5909	61.1113	49.7252	27.6743	20.7009	44.5806
85.60573442_269.9362248___39	141.014	194.986	196.181	31.0319	57.796	28.4364	11.7869	21.6407	27.9673	20.3562	11.5085	21.8211	109.624	189.877	157.381	28.9786	47.2971	38.3796	7.92691	13.9284	16.4553	20.5789	20.2414	15.1238	312.2	318.831	279.671	45.4439	43.8227	52.812	6.41825	8.74923	29.9013	34.5674	0.0313307	9.67503
85.68185505_415.763476___852	38.1424	13.8236	46.5144	31.0497	57.3453	51.7872	23.3876	14.4589	32.3447	24.067	30.3859	13.1254	27.8927	32.0739	17.2253	29.1196	27.6972	18.1187	30.9239	21.0015	24.2219	11.4986	15.2525	17.7634	37.1033	82.39	50.5375	62.6216	53.8164	73.5816	37.9707	68.7509	38.4064	37.824	17.0906	41.5082
85.74536808_306.1796984___15	171.058	186.26	186.604	58.0163	39.9547	31.8713	43.0982	17.9868	27.9998	44.487	11.4649	17.611	165.064	188.974	144	31.7836	86.9085	66.1515	22.0602	44.5904	55.6815	16.1967	23.0612	25.5182	177.627	218.863	387.577	42.4697	60.5168	30.6003	22.3373	34.8339	23.8054	31.017	30.9427	16.0709
85.78333587_402.0796029__[M-H+HCOOH]- 40.7853_1	58.9867	60.1921	38.916	141.125	123.288	115.214	194.062	156.75	168.915	123.357	127.95	74.8061	134.218	167.404	159.475	160.802	152.643	148.255	119.219	163.634	149.472	72.3116	144.763	134.609	108.809	115.375	107.32	87.8168	116.48	69.4621	89.8365	81.19	67.0567	55.3126	48.1705	85.1261
85.80104198_475.7687474___2	74.5187	112.213	85.7472	54.0661	22.1278	66.163	39.0494	18.0916	8.08138	16.0159	19.0333	8.8654	69.7204	31.2306	40.3215	36.6382	63.8553	59.3525	13.9134	18.6377	14.4423	6.85954	7.60095	7.592	161.785	66.1007	92.284	75.2806	91.5892	102.888	25.223	57.4096	50.674	10.2661	20.4342	28.7379
85.88516263_307.5677716___15	166.764	164.551	136.615	31.2396	39.9547	46.0364	43.0982	17.9868	15.9999	28.3099	26.7515	17.611	71.4849	103.524	117.462	58.6774	57.2143	38.882	30.0388	28.1624	22.8866	20.8244	28.1404	22.9664	124.599	129.394	95.7237	53.795	38.2062	33.3821	9.57311	26.1254	23.8385	17.2316	17.1904	25.7135
85.99636109_399.161022__[M-H+HCOOH]- 40.9902_1	93.6637	143.898	92.198	128.683	157.38	116.02	242.715	192.366	162.232	233.23	208.215	170.33	184.619	244.986	157.8	227.389	181.024	129.246	186.533	237.714	234.117	170.826	232.116	233.816	116.223	89.8974	93.7247	173.066	189.66	139.547	123.416	160.177	127.174	107.67	82.2572	61.8502
86.03432962_300.7297381_[5][M+1]-__38	1675.36	2123.5	1642.15	597.749	761.836	546.854	354.024	403.185	313.055	390.944	421.096	340.011	2138.21	2378.02	2354.78	771.049	1236.61	1050.94	504.03	485.122	542.814	311.534	337.023	331.177	1784.29	1861.96	1726.95	787.765	594.299	931.378	345.189	400.992	364.852	345.139	230.813	335.207
86.0340659_267.2366544_[6][M+1]-__39	1859.85	2137.87	2040.95	371.651	407.837	434.662	211.776	207.627	199.975	240.49	197.26	139.851	3741.08	4386.75	4306.15	227.789	416.728	408.572	201.805	137.847	188.867	90.6067	125.634	102.863	2248.89	2604.39	2320.24	256.056	218.188	329.174	109.555	120.041	125.501	187.702	111.306	153.005
86.03413734_493.9207304___48	169.797	984.383	828.603	301.912	303.231	266.919	216.69	156.251	149.924	148.604	162.057	126.641	123.432	151.274	128.792	60.6626	65.8693	62.0804	45.8475	30.3332	45.5375	34.399	50.7836	40.6091	1685.07	2619.44	1924.76	222.286	154.586	340.244	132.653	126.689	156.927	116.734	89.082	96.064
86.03352662_227.1985508___6504	550.767	623.26	470.821	160.349	260.717	197.073	157.199	106.871	160.531	137.92	154.657	101.766	555.498	605.705	580.916	105.754	163.081	146.747	77.783	77.0979	76.421	43.7807	79.0785	53.3152	624.57	844.925	708.673	126.972	130.951	227.206	112.416	126.342	130.532	86.9315	69.497	125.476
86.02667086_132.2718545___6842	170.369	169.535	158.686	145.771	164.477	116.453	240.671	126.19	273.241	340.736	293.172	508.127	711.46	568.364	531.359	142.912	0.0198348	185.445	0.0182778	121.119	292.567	228.912	267.6	187.735	183.012	351.846	210.207	118.834	68.3394	150.424	121.129	141.021	113.146	131.088	103.349	133.465
86.03398484_370.5857696___4	244.418	245.015	260.635	167.564	200.528	213.794	191.567	147.49	191.555	206.239	213.536	169.895	104.543	127.368	112.778	179.01	220.706	182.34	110.161	108.968	140.36	80.8266	76.7344	102.125	527.993	823.075	716.256	191.728	196.264	268.344	143.249	195.929	180.638	145.075	137.732	198.411
86.21552835_399.9371056__[M-H]- 87.2241_1	63.9903	41.7309	94.8038	58.2181	133.456	110.915	152.726	165.978	113.953	144.095	146.188	132.455	118.785	152.534	74.4182	139.712	139.344	179.692	159.334	159.88	152.541	144.066	129.254	144.701	179.334	84.0387	171.858	115.695	147.991	141.271	122.102	142.469	96.8272	99.7328	76.8023	117.828
86.4284877_399.4324192___262	54.2272	46.4389	31.2563	102.559	71.3117	92.5039	136.361	51.1865	97.8148	112.196	117.674	117.759	131.485	64.2916	88.4597	139.223	132.701	119.183	60.6107	178.793	119.703	96.6685	161	125.152	69.5972	65.6767	84.3811	102.483	108.243	59.0558	108.244	81.5242	96.8018	101.553	37.9769	103.269
86.44772873_475.9055928__[M+Cl]- 51.4838_2	94.0072	60.5473	66.6266	53.8625	62.5446	25.9516	31.5395	28.8777	16.125	48.6021	50.0045	48.566	12.8129	29.0208	34.1598	19.328	41.4609	26.889	2.01242	16.2651	14.6214	13.7026	5.12093	10.2487	62.4752	90.8936	73.3691	70.1657	62.8231	69.9146	19.154	34.8158	38.0745	17.3255	27.5867	19.3699
86.65546956_400.12369__[M-H]- 87.659_1	29.534	41.7309	54.8538	44.7752	120.144	134.698	54.9741	62.0557	89.4214	100.853	121.335	39.7206	99.5464	134.129	64.942	106.53	73.4877	80.8298	29.7955	117.024	102.826	65.7213	121.521	100.472	65.3989	75.506	79.6464	39.72	57.4909	40.6211	42.4254	80.79	74.4532	41.5279	36.3327	70.7352
86.80478772_762.4229965___3610	4.84814	13.6758	15.4859	0.0402612	4.38895	10.4877	15.5139	18.0958	12.1283	12.0138	15.0666	4.35954	15.3412	18.6428	9.31822	4.91616	2.20438	6.87914	6.0838	7.07006	6.2761	6.97194	15.4041	10.3101	6.09138	26.768	6.17605	19.3537	5.46183	33.5639	36.4335	22.6661	61.3232	39.9321	40.0982	100.364
86.83281194_130.2807547___8217	0.044486	0.0417716	11.6516	4.44502	0.0400679	7.05059	11.7111	0.0328174	4.03751	8.06025	11.4392	0.0396846	130.313	0.0238966	0.0209605	2.40051	0.0198348	2.23611	0.0182778	0.0213417	103.49	0.0210019	0.0232272	126.913	0.0283566	0.0274813	0.0290008	2.84561	0.0249155	0.0253439	3.20407	0.0264366	11.977	13.8794	6.92725	0.0293344
86.88292217_401.7529353___263	44.24	37.0413	70.5347	101.698	112.175	49.6138	58.8013	82.8104	40.142	60.6579	53.565	30.5015	79.4568	139.254	76.15	97.1143	69.4327	97.7003	67.5515	100.768	71.1413	72.7461	60.2338	88.2488	37.3207	71.681	48.5189	48.1576	77.3643	91.3491	54.1383	70.1032	38.706	72.6588	38.0678	38.5786
86.89930051_475.5812613__[M-H-C6H10O5]- 249.957_2	178.808	150.719	167.353	49.462	74.2347	84.4148	39.4978	57.8931	12.1221	20.2826	30.8444	22.1174	42.3031	64.7438	48.628	14.5152	59.232	46.0723	7.94068	16.2856	20.6052	9.14605	15.1794	17.6927	46.2627	99.0441	37.8673	59.0282	51.7433	84.0772	18.9173	45.9277	24.37	17.1102	13.6228	12.7525
86.94586889_1124.179569___5111	200.653	175.075	178.397	214.001	208.86	204.541	153.998	195.714	124.991	169.32	180.747	146.925	137.553	132.861	116.821	130.79	121.281	91.6604	117.716	93.6942	97.6424	104.199	100.696	105.608	150.732	110.74	138.686	151.655	70.8903	77.5268	183.507	191.905	134.453	134.593	173.246	89.8287
87.0070469_128.2331255___142	209.787	362.99	299.586	4215.2	6957.01	5370.15	8469.03	7171.66	7362.28	6872.4	7768.52	6836.8	719.752	1050.26	910.847	4710.67	5132.29	3233.96	3206.6	3826.49	2341.23	2528.44	2174	3101.71	308.685	527.076	357.73	2954.33	2688.36	4765.37	3776.09	5597.25	4925.81	2879.83	2076.49	2927.98
87.00914383_1199.905015___238	0.044486	0.0417716	0.0352303	0.0402612	8.51074	3.39581	11.2768	13.9303	0.0365954	23.2636	7.34116	#VALUE!	0.0232039	0.0238966	15.5267	0.0221872	15.8308	8.77718	0.0182778	4.53005	4.01951	0.0210019	14.7903	0.0232341	0.0283566	0.0274813	0.0290008	#VALUE!	10.5819	13.4614	24.6824	25.3346	34.574	16.6869	22.5106	9.34859
86.97872473_1136.591158__[M-2H]2- 175.966_177	44.1204	156.002	88.9484	66.9869	79.7581	109.579	66.5164	46.9182	64.0181	60.4992	103.329	48.3228	109.273	321.995	228.718	154.219	198.226	81.2587	197.32	84.3237	88.8613	114.584	113.056	105.409	59.4854	87.7374	64.5598	74.1866	75.9891	99.488	64.2015	67.005	38.8627	69.1693	110.423	121.452
87.01012545_490.9793896___4549	527.898	764.478	803.01	453.21	783.255	650.535	622.685	537.988	497.892	573.901	658.135	421.314	313.969	350.616	360.243	475.314	416.593	347.227	367.412	277.466	319.943	286.792	299.38	325.523	1089.94	1338.83	1342.85	490.107	530.381	616.027	559.323	602.298	645.414	593.426	479.768	573.774
87.01068883_306.3685436___1639	537.913	283.153	698.081	401.634	726.261	597.533	642.475	564.514	657.284	422.474	433.447	565.12	473.311	617.068	515.11	560.844	600.808	588.245	437.017	436.272	388.896	288.005	332.49	309.872	151.745	1602.9	781.664	439.605	408.956	631.153	523.595	506.643	551.671	478.54	400.121	404.55
87.03493478_266.4880888___4621	564.172	265.28	528.399	29.2686	64.6483	59.7066	38.8204	43.8865	27.9899	28.0961	26.5187	21.8221	510.198	248.63	136.581	46.9878	42.1905	42.3132	31.1107	27.8931	30.8933	25.2132	32.2416	32.8205	190.906	301.635	274.262	31.2829	30.1554	61.1947	19.3053	35.0826	32.9508	48.3144	55.4835	22.4646
87.03658328_762.677663___3611	38.7355	41.0786	27.1003	22.0077	35.1553	20.9753	46.5417	14.4766	20.2138	36.0413	33.7824	26.1573	10.2432	26.6326	7.08243	17.2332	17.635	11.4652	10.1397	11.7834	10.4602	11.6199	20.5388	23.1978	12.1644	29.7422	18.5482	35.9882	44.5538	63.3691	27.8732	63.4419	41.2826	52.044	62.0555	121.767
87.04608073_459.8331537___6690	111.766	133.146	123.925	35.4734	97.0332	63.423	46.666	50.3373	44.1898	71.971	37.9942	43.6458	101.148	85.7558	89.2139	51.8093	36.618	29.1834	34.1255	32.5303	39.1628	13.7196	35.4564	30.3308	102.333	148.477	100.362	65.6125	67.5503	101.574	37.8516	66.0794	70.5719	47.8206	54.4508	60.4546
87.10511883_401.3196919___264	44.24	41.6714	65.4455	61.8419	71.075	67.333	78.4017	112.163	52.1845	60.5721	75.4102	43.5735	60.4865	102.532	59.7474	83.8527	80.9081	50.1697	22.8805	52.9692	75.9253	60.8025	45.0549	26.0297	87.5144	90.8379	73.1655	84.0948	64.6143	105.708	22.2922	43.4946	62.4692	31.1009	44.7298	41.7935
87.12128146_481.003664___4798	105.17	121.571	151.862	35.3818	30.1211	80.2126	33.6957	32.4819	44.3259	27.9406	30.295	13.0441	37.4743	45.2918	91.6614	38.6032	10.767	24.7686	15.86	6.96123	14.4054	4.56265	7.58111	10.095	55.3979	68.1828	28.3317	90.0504	37.8438	51.2609	9.42413	8.58765	20.5586	17.0699	6.7857	9.54567
87.21067022_412.910137__[M+Cl]- 52.2397_154	29.2433	41.3038	77.3099	53.1051	79.3027	45.7171	62.2758	39.6668	44.3015	32.0394	64.6013	30.5488	56.5198	34.3931	37.0639	39.261	32.866	39.02	12.104	16.5158	16.7624	20.9027	12.8769	17.273	51.0854	88.0845	67.8258	34.1463	44.0969	76.3345	47.9922	61.1247	47.8024	71.9365	31.1127	29.146
87.24637828_762.16833___3612	4.84754	9.12858	7.73991	8.81245	0.0400679	3.49588	11.6356	21.7167	12.1267	8.00979	11.3121	0.0396846	7.69328	16.229	16.5582	12.4989	8.83077	4.59191	8.1234	7.17216	2.09496	13.9619	7.71235	15.4874	24.3593	26.7885	9.2624	8.30401	8.18742	24.2283	31.0055	19.8518	20.4349	81.2801	36.5683	93.5669
87.33297243_412.3726503__[2M+Cl]- 26.1912_154	780.352	846.301	1021.7	611.438	1058.75	985.06	505.721	500.259	160.482	238.049	241.352	241.761	794.253	850.809	626.348	451.667	515.477	413.572	53.6969	294.764	137.616	150.699	174.557	231.073	291.753	373.584	342.019	273.521	275.014	287.518	73.8382	101.792	102.818	191.171	38.0258	54.949
87.55305654_412.8283277__[M+Cl]- 52.5835_154	793.908	586.047	1191.21	1087.81	1068.79	1224.03	475.189	460.31	574.042	161.1	135.219	173.452	587.852	642.537	557.638	486.273	412.839	525.334	62.5665	376.817	121.002	185.77	194.155	235.423	216.805	362.085	327.895	171.071	241.158	210.483	60.8991	99.525	62.8758	189.98	34.632	100.708
87.74399742_452.2417187___2659	19.5363	46.0547	30.998	26.6971	58.4449	52.8964	70.1349	76.0391	59.8152	0.0365366	26.6237	26.2583	12.6961	7.81005	18.2587	16.965	0.0198348	6.78805	1.99139	4.66915	6.19019	6.88417	7.61123	10.125	18.5505	15.0009	9.4807	19.6528	13.5737	8.3049	9.49274	14.3866	8.84112	6.84251	3.41986	19.1989
87.77449786_412.3566593__[3M-2H]2- 59.1804_154	449.012	575.078	735.64	355.332	548.765	634.538	200.639	284.848	292.175	111.643	83.4483	74.6732	351.735	367.152	271.494	270.36	269.48	253.178	33.8035	174.417	72.7321	50.2108	78.6745	125.056	141.079	150.05	136.766	125.559	165.386	281.389	54.3899	42.2758	62.7595	59.1661	13.8276	45.2521
87.92575468_125.954167___8053	24.1283	50.9863	34.3948	31.2471	478.104	45.1149	74.2094	47.2637	36.5164	47.5956	29.9948	13.2333	168.195	518.174	191.958	0.0221872	189.1	132.814	0.0182778	0.0213417	0.0189364	0.0210019	138.97	0.0232341	21.5221	20.8784	34.594	19.5794	24.3371	27.4557	9.44211	25.7904	38.2029	34.0629	30.6332	57.3072
87.9206904_153.4532504___6726	65.8862	114.608	61.7099	57.6097	83.4639	73.7916	46.5767	46.96	32.0618	60.2767	79.7132	47.9925	88.3004	144.487	93.0643	126.406	121.883	70.0353	71.4377	62.7523	437.634	84.1152	205.283	187.361	28.5482	30.6835	42.2344	49.0229	50.0884	36.2423	38.6168	29.6078	30.4383	35.2025	66.7674	45.8898
87.96705701_451.1720912___9583	14.6493	23.0254	15.4932	13.3457	44.1187	28.2068	24.8919	39.6655	64.4581	12.0486	15.2106	30.6311	2.5397	7.82029	9.12861	9.69457	8.64918	11.3137	5.97301	14.0082	6.19173	9.17683	10.1513	5.06373	6.18324	21.0024	18.9626	19.6542	0.0249155	5.53633	12.6586	5.76308	5.90313	20.5672	10.2604	0.0293344
88.01940156_1095.001576__[M-H-NH3]- 106.054_24	3328.04	4074.74	3043.49	2781.94	3835.15	2441.45	2777.74	2623.07	3313.6	3708.27	2879.15	4832.02	81.4753	143.858	98.6648	86.4803	65.3659	99.5909	82.3543	85.0118	85.4792	89.8944	152.344	126.292	1424.22	2161.58	1228.53	1137.07	1746.33	1831.85	1224.31	1278.09	1926.2	1148.35	2246.8	2619.4
87.99648417_412.3039466__[M-H-CH3]- 104.025 [M-H-C3H2O3]- 175.011_154	316.345	206.048	245.198	318.105	342.894	373.067	165.631	206.863	93.9706	68.9257	86.8204	43.6962	178.469	181.618	156.255	159.848	113.284	83.3731	27.2388	39.5635	48.8732	29.8196	41.1332	55.5048	67.9848	186.641	118.899	80.7758	75.1761	57.4019	28.7946	46.5868	35.8626	59.1318	24.1983	74.3314
88.00593323_633.1049746__[M-H-CH3]- 104.027_19	53.5084	191.175	42.4076	96.7156	328.891	299.964	201.886	97.3596	64.363	131.02	269.384	69.565	35.6785	57.796	34.6862	51.3195	50.1068	30.152	50.1866	21.1706	66.522	23.0292	25.4638	33.1802	37.2641	79.2761	72.1898	87.9889	73.9923	102.787	47.8746	49.1667	74.4256	62.1133	41.1511	35.5503
88.04171357_182.8291932___9345	156.766	175.028	156.376	210.969	417.582	175.947	247.832	232.048	208.746	365.833	246.557	219.258	140.945	152.988	365.534	194.164	207.813	253.864	156.041	123.675	165.955	193.905	276.921	318	261.817	506.427	189.475	282.016	211.916	320.435	259.992	490.311	461.758	662.778	278.877	315.829
88.0418854_244.5382796___9105	29.3138	45.8506	34.7059	35.4648	48.3399	45.6433	76.7228	75.6808	71.9177	68.2977	53.0636	43.64	174.631	166.49	153.349	97.0497	146.109	124.085	139.995	120.859	119.329	132.194	195.537	143.887	77.9652	75.5949	57.6825	42.6014	24.6913	36.1458	70.6788	72.9883	62.9243	117.462	48.41	74.2057
88.01083321_126.6802599___8070	14.7129	69.0464	58.2488	93.2743	195.172	207.864	409.013	248.339	384.47	252.449	381.364	321.532	0.0232039	0.0238966	0.0209605	0.0221872	0.0198348	0.0207037	344.249	242.238	0.0189364	0.0210019	0.0232272	283.631	18.4072	0.0274813	169.959	117.106	0.0249155	216.194	216	288.847	195.104	145.923	95.005	179.774
88.0421764_338.7776794__[M+Cl+NH3]- 36.0462 [M-H+NH3]- 72.0229_65	38.9765	41.3806	34.7434	44.3057	26.3943	24.5795	27.1932	28.9238	16.0863	40.0765	37.922	30.5577	146.555	166.047	147.459	76.8281	39.4315	68.7714	56.3931	58.9752	83.2178	126.207	138.995	118.263	43.8641	66.9264	64.1029	34.1656	16.5246	44.8376	44.9334	52.5687	41.3253	76.4003	31.153	29.1781
88.19183202_326.8119894___5957	14.6415	13.8051	11.6108	17.7295	39.6847	32.0375	15.5825	25.3452	24.1797	20.0728	3.79773	17.4849	10.1436	13.0586	13.7135	9.71976	10.8171	13.6169	3.9781	2.33093	12.3978	4.59679	5.08896	10.1577	83.4897	100.345	88.0098	105.445	77.713	94.0423	78.5297	72.3276	56.9381	41.3874	27.7439	25.6014
88.21790696_475.4886109__[M-H-C6H10O5]- 251.282_2	246.595	273.383	217.565	116.709	178.006	315.03	165.098	187.087	95.6104	150.498	147.951	100.492	184.522	329.102	270.926	229.634	354.5	190.538	182.013	102.738	142.745	106.49	129.219	119.561	188.31	191.922	128.966	220.757	319.326	292.955	318.833	465.424	332.646	345.208	294.52	331.403
88.21396869_411.9186038___8567	68.2579	65.3398	130.926	99.7584	146.353	95.4309	51.2225	82.1126	113.909	56.7623	46.3708	30.972	86.2196	113.78	53.2183	33.8869	44.3479	56.7179	11.9188	34.5792	32.9986	20.6199	36.3547	25.3183	53.1336	78.2644	80.7825	57.7112	74.1309	105.091	41.5923	32.0284	29.8855	53.2377	44.9396	19.3938
88.40991054_326.0311722___2297	9.76101	41.4154	11.5981	22.1618	30.8251	28.1256	11.6712	7.24148	16.1198	12.0437	3.79773	13.1137	10.1436	15.6704	25.1081	4.8532	10.8171	13.6169	7.9562	9.32371	12.3819	6.88608	7.63344	10.1577	84.6954	60.5847	97.5868	77.4895	77.9728	82.8739	53.5236	49.0757	62.9477	24.3465	27.7439	25.6014
88.43546786_475.7482043__[3M+Cl]- 17.8218 [M-2H+K]- 51.4838_2	216.262	252.568	284.875	172.55	282.403	287.8	163.194	186.932	170.031	66.3644	154.312	117.936	196.941	70.9619	230.421	247.65	121.632	210.625	72.7627	137.72	139.813	75.7591	106.625	125.996	177.395	184.773	206.677	340.585	302.687	266.579	384.741	372.041	448.094	238.097	87.3699	163.474
88.43412519_399.6967474___265	4.9378	23.3004	23.5295	40.5217	49.2009	117.749	35.8026	86.0587	36.2888	32.5209	46.1933	44.3628	15.1686	41.7141	29.6777	36.1571	30.2015	20.3719	22.616	32.5798	20.6546	13.7739	10.1622	22.8101	40.1184	49.4647	59.9146	39.3095	96.8832	102.923	47.3469	31.6258	79.1272	34.2872	27.2916	28.6759
88.45499879_474.9885037___455	44.0696	96.7426	144.025	53.2486	128.892	214.318	112.829	91.3888	86.2882	147.311	112.456	26.2073	76.9988	485.48	203.206	176.041	270.608	35.271	209.41	52.2365	110.41	51.8488	54.2791	34.0889	15.4446	102.989	45.905	112.873	163.309	203.93	108.973	40.6735	249.336	133.257	81.7439	121.37
88.63950965_326.0084579___2298	9.76101	22.973	19.3244	22.1303	13.2108	21.0942	19.452	10.848	16.0979	4.01456	7.59546	13.1147	5.06499	20.8677	22.8255	7.27979	8.64281	13.5995	5.96715	2.33093	2.06365	6.88608	10.1649	5.07099	77.8503	88.359	28.8989	83.6667	18.9869	73.2841	34.8773	39.3556	29.549	20.8684	20.5118	15.9787
88.65676754_475.6787913__[M+Cl]- 53.6909 [M-H]- 89.6667_2	181.317	158.917	177.703	169.954	94.7457	169.277	123.385	143.59	98.9305	76.0755	123.676	99.5299	141.773	79.2438	171.732	151.416	46.0779	108.655	22.6956	79.8754	79.06	80.7272	93.7638	92.7348	107.143	90.1444	156.525	264.608	161.713	184.396	288.828	254.276	265.555	162.052	181.091	137.938
88.65454684_409.2136718___9220	34.4738	41.7282	35.1304	49.2193	93.3773	91.2214	31.0546	51.056	52.9149	35.9262	53.0368	22.0553	71.7254	89.0818	104.942	34.7825	53.7404	36.084	34.5544	32.5081	26.7563	25.1576	20.2437	33.2031	64.5863	180.922	88.0358	81.2271	85.364	163.455	44.3558	144.087	90.8116	102.577	62.3492	61.5663
88.72720816_578.6981279___33	9.73572	13.7738	55.4242	4.38215	0.0400679	6.97776	0.0353867	14.3374	0.0365954	0.0365366	0.034555	4.33352	226.324	174.565	281.686	4.855	4.3357	2.25848	5.98715	2.33151	4.14373	9.16061	2.53422	0.0232341	15.4465	45.2516	19.0373	8.43989	0.0249155	8.29325	3.17173	2.88056	8.8741	0.0314148	10.2264	6.39488
88.75708597_412.9398603___8568	44.3947	32.5682	11.7359	35.8352	66.8052	56.8676	23.6011	25.2471	24.4932	44.5267	26.8857	26.5474	71.5673	13.1761	27.6994	26.6254	17.4642	16.0124	8.04181	18.5967	8.34956	18.3288	28.2266	10.2522	83.1645	33.292	115.587	107.191	168.588	175.98	127.988	122.422	90.0466	41.4641	39.6781	65.5791
88.88240448_475.4741966__[M-H-H20]- 107.905_2	44.0696	104.257	124.315	93.185	82.5423	105.996	100.208	80.7423	29.1206	45.1852	81.7706	39.8181	97.4935	133.071	132.974	80.1032	99.7278	88.7571	28.8639	50.8041	47.8826	42.7209	12.6854	53.3171	90.4156	29.9293	50.5431	131.426	144.726	101.978	97.2283	105.496	105.124	132.472	65.1274	92.8472
88.93273926_1203.596642___9630	0.044486	0.0417716	0.0352303	0.0402612	0.0400679	0.0319682	0.0353867	0.0328174	0.0365954	0.0365366	0.034555	30.9036	0.0232039	0.0238966	0.0209605	4.71227	18.9569	0.0207037	15.533	0.0213417	13.7219	0.0210019	7.39974	0.0232341	0.0283566	0.0274813	0.0290008	0.0257658	0.0249155	0.0253439	0.0290452	0.0264366	0.0271353	0.0314148	0.0313307	0.0293344
88.94569508_579.6102711___3025	29.2072	59.6866	65.1679	21.9381	17.505	13.9555	27.0327	10.753	19.9462	11.9343	15.0773	26.0011	210.726	296.605	237.555	24.275	15.175	20.3264	15.9657	32.6411	8.29897	13.7593	10.1503	17.7284	21.6251	56.0754	19.0373	19.6931	10.8633	22.1153	6.34347	20.1639	11.8321	13.7185	20.4529	9.59233
88.98960992_405.1570646___7924	361.837	416.7	286.901	467.38	556.21	671.387	456.661	482.89	412.978	385	418.362	511.188	168.123	117.366	173.946	60.9167	66.5286	132.685	65.5658	86.6515	53.9752	110.762	88.4091	115.98	212.395	249.27	186.085	139.71	187.015	230.156	202.958	136.335	192.617	121.818	105.2	166.897
89.0166204_1094.750011__[M-H-CH4]- 106.054_24	34814.6	28162	23169.4	25118.1	40505.3	28045.9	28139.6	33323.8	26514.2	35390.9	32970.1	28717.8	1277.8	884.787	1210.04	1070.24	948.85	2501.93	1362.13	694.613	1241.73	1117.8	1809.99	1660.07	11767.6	18224	21869.8	10731	14134.4	13674.9	11985.5	9282.37	13609	21322.7	13579.2	19877.9
88.98734286_131.4389204___8292	947.306	1125.21	883.274	602.632	995.886	517.563	691.234	1443.11	797.439	858.745	664.445	782.632	0.0232039	0.0238966	402.392	0.0221872	152.236	0.0207037	193.437	521.815	587.341	331.719	1008.01	490.984	356.849	257.634	389.738	452.37	0.0249155	305.623	369.383	366.546	316.139	332.981	276.829	493.479
89.02610127_630.4155047___8333	537.957	278.018	562.384	743.495	395.424	681.374	684.531	580.209	653.258	589.815	429.184	577.219	297.469	1089.92	1025.34	493.126	1145.49	165.37	444.113	301.118	365.68	146.846	282.393	211.585	2725.79	2299.71	1958.26	5641.26	1936.52	2934.4	4292.59	4924.3	5039.62	2271.26	1585.72	1411.3
89.10565065_475.4085884___456	29.3797	36.8543	62.055	53.2486	48.615	63.7568	38.9926	36.7189	32.8043	36.0358	3.80666	43.6789	38.0167	56.7792	51.2981	48.4763	41.6617	18.093	21.8936	9.30659	14.2791	13.7197	17.7596	12.6711	27.8004	54.9844	47.3841	60.2043	66.0587	50.4356	9.45909	34.4594	81.1284	52.4995	10.218	19.1286
89.0961901_408.9066077___9221	39.3443	104.634	19.5222	44.7318	114.602	81.3488	54.9781	65.5461	40.6443	40.4215	57.4893	17.6425	61.9023	70.0975	68.9606	36.4064	58.4038	54.8251	19.807	20.8772	30.8422	18.2742	30.5278	20.1957	64.5289	114.127	43.9777	79.2222	111.512	109.768	70.2919	71.5918	61.6935	58.9058	30.5927	50.7413
89.10934082_328.6182198___3710	9.74857	9.16961	11.5701	13.2872	26.3892	10.5344	19.4238	7.21457	0.0365954	4.00997	3.79328	4.36549	7.67866	10.5622	2.30984	2.45662	8.75001	4.59017	2.01433	2.35983	4.17884	4.64664	2.57207	10.2661	21.5176	24.2818	6.32311	14.041	13.7355	19.5722	22.1632	5.76093	8.96032	0.0314148	6.83015	3.23624
89.17026958_579.0742874___3026	29.2072	13.7738	36.347	0.0402612	4.37626	3.48888	3.86182	10.753	0.0365954	11.9343	3.76932	8.66703	121.311	113.743	112.512	4.855	4.3357	6.77545	11.9743	18.6521	10.3737	6.87046	10.1365	10.1305	24.7143	55.2714	22.2101	36.5729	13.5791	13.8221	15.8587	17.2834	23.6643	27.437	17.0245	15.9872
89.3370764_124.0319948___7311	4.86243	4.56922	0.0352303	0.0402612	8.75462	6.9849	3.87144	3.58703	0.0365954	3.99724	0.034555	0.0396846	0.0232039	0.0238966	0.0209605	128.623	111.61	119.591	0.0182778	0.0213417	0.0189364	119.034	2.5388	0.0232341	3.10102	3.00353	9.50559	0.0257658	2.72333	5.53751	3.17017	2.88813	0.0271353	10.3012	0.0313307	6.41265
89.33116567_329.6882608___3711	0.044486	4.58996	11.5834	4.43458	17.614	7.03157	7.78094	14.445	16.0821	8.0296	3.79809	4.37104	12.6471	23.4676	13.6858	7.27841	0.0198348	6.80119	0.0182778	2.33071	2.06336	11.4715	5.08119	5.07026	18.5605	23.982	18.9693	8.42457	18.9957	5.52561	0.0290452	8.64139	2.95112	6.8587	10.2452	12.7826
89.4003622_578.6186473___3027	4.86786	9.18255	0.0352303	0.0402612	4.37626	3.48888	3.86182	7.16868	3.98924	0.0365366	15.0773	0.0396846	17.7743	57.0764	76.0295	4.855	4.3357	0.0207037	11.9743	2.33151	8.29897	6.87046	5.06843	2.53262	15.4465	24.0048	3.17288	5.62659	8.14744	16.5865	9.5152	17.306	14.7902	17.1481	10.2264	12.7898
89.53138403_419.1227976__[M-3H]3- 271.629_6	195.393	148.858	109.289	53.1599	88.0889	59.7682	77.8388	61.3447	64.4944	32.0551	41.8136	39.3173	40.505	26.0409	34.2642	38.7214	15.1254	24.8772	15.9116	18.6201	22.1182	20.6148	25.3736	10.1362	40.1401	44.9316	44.1136	50.5125	29.8789	38.6867	31.5678	31.5702	29.461	41.0825	30.6989	19.1592
89.75522731_417.6372118__[M-H+NaCOOH]- 22.7828 [M-H]- 90.7661_6	153.669	111.199	255.353	44.2883	39.695	49.2854	23.3857	25.3006	36.3314	16.049	15.2326	26.2126	22.8175	13.028	15.987	2.42661	19.4684	11.3082	7.95456	23.3345	18.5916	6.88057	5.07554	22.8024	21.6171	32.8517	28.391	30.9524	27.1998	75.3632	28.4803	20.1452	26.586	34.2872	30.7666	25.5835
89.8666287_417.8709217__[M-H]- 90.877_6	218.754	290.412	308.029	31.0018	52.8578	42.1898	7.78477	10.8298	8.06238	4.00594	0.034555	8.73753	22.7879	7.81681	15.987	12.1011	6.48062	15.8315	7.95456	6.98232	2.06573	9.1741	5.07554	12.668	21.6171	23.9603	9.45251	25.2581	21.7306	19.3457	12.6229	17.2245	26.5166	23.9707	10.2291	12.7738
89.91664928_764.7622453___3613	19.3741	4.56316	15.464	8.80571	21.9716	20.9484	11.6208	36.1446	8.07437	4.00071	11.2976	26.1232	5.11851	7.97342	13.9445	7.37219	13.2042	18.322	6.07315	7.06092	10.4419	23.2063	7.69288	20.5953	42.6074	41.7017	3.08596	16.5903	30.0297	42.8208	12.3765	17.0658	37.8653	39.9359	9.97172	49.0289
89.97719863_417.974434__[M-H]- 90.9882_6	336.86	260.424	254.822	52.9298	43.9939	112.618	54.4246	46.8669	44.3431	28.0072	45.5659	34.9501	12.6455	23.7737	9.13542	21.8096	10.7878	18.0931	13.9205	9.30976	18.5916	11.4676	5.07554	12.668	33.9697	26.9223	37.8101	33.6775	8.13891	38.6441	25.2458	40.1906	26.5166	10.2861	20.4583	35.0858
89.95521085_454.6978628___2414	43.3729	18.1772	23.2997	13.1744	21.783	13.9213	15.3777	25.3309	57.8307	7.92185	7.5034	12.9529	12.7374	7.8484	2.29351	4.85335	4.33839	4.54582	2.0009	4.67572	10.3621	4.60332	10.1953	7.62688	12.4212	15.0457	15.8729	11.245	5.44521	8.33034	12.6751	8.66977	5.92011	20.615	10.2726	6.4045
90.01139377_1093.041205___24	85267.4	60488.2	47008.8	48789.8	66855.2	72084.5	51732.4	48863	45000.8	54575	61565.2	50517.9	1443.16	1274.47	1988.5	1452.13	1567.3	1690.04	1155.76	1133.24	1766.71	1612.34	2239.55	2124.61	22710.7	26226.3	20412.2	15908.7	24851.3	28048.3	19441.6	13652.3	20051.8	20972.3	22165.8	24512
90.00726982_122.9681262___7312	4.89283	41.374	58.1226	39.8779	57.2897	45.7368	54.5498	50.5633	52.3567	36.211	30.417	255.419	95.6305	471.409	0.0209605	373.626	124.21	2.27595	0.0182778	0.0213417	525.133	4.61699	148.262	516.979	21.8452	18.1354	38.2801	36.395	16.4421	22.2997	6.38193	11.6306	2.98266	24.1863	20.701	29.0403
90.01247172_1203.638606___9631	0.044486	0.0417716	0.0352303	0.0402612	0.0400679	0.0319682	0.0353867	0.0328174	0.0365954	0.0365366	0.034555	17.6592	0.0232039	51.3723	0.0209605	60.3422	62.6194	93.5057	58.5954	0.0213417	56.2338	0.0210019	69.4793	35.7578	0.0283566	0.0274813	0.0290008	0.0257658	0.0249155	0.0253439	0.0290452	0.0264366	0.0271353	0.0314148	0.0313307	0.0293344
90.12743762_757.6619516___2211	4.92243	18.2843	19.6394	0.0402612	17.6059	17.5032	60.3936	25.7724	44.5627	8.01841	11.47	4.42146	5.13258	13.3435	16.3336	12.3241	2.20936	9.18379	4.06198	9.4287	6.28797	26.562	29.7313	15.4992	15.4402	14.8324	15.6664	39.2847	27.2241	47.2771	40.534	122.495	50.3777	358.264	153.703	387.845
90.20584017_417.92316__[M-H-C6H8O6]- 267.242_6	218.177	168.952	150.022	26.5427	77.6893	76.5844	23.3534	57.7463	44.3431	28.0072	26.6142	17.4751	25.2911	28.62	15.967	12.1164	15.103	13.5535	1.98624	18.6426	16.5056	13.7611	10.1387	17.714	33.922	29.9136	37.8547	36.5292	35.2686	89.0133	18.9574	28.7414	23.5996	27.4297	6.82818	31.8962
90.34620386_758.1944832___2212	4.91299	13.8916	11.8062	8.9241	17.8343	10.6385	51.1508	25.762	47.3188	4.06137	11.4699	8.86067	5.1251	2.66453	9.31933	2.46108	15.4429	6.89603	6.08478	4.71435	8.37223	25.9916	25.6825	25.7957	27.7924	2.96649	18.7672	22.4084	19.0568	41.9804	37.9881	63.5951	27.2528	281.698	153.331	296.194
90.39479634_1090.976163__[M-H]- 91.4025_24	259.033	232.748	195.23	172.926	205.461	130.887	147.397	75.101	113.748	197.173	162.219	195.326	7.58731	23.6562	9.20853	19.5693	15.3033	13.4879	20.1488	18.8524	6.2858	13.8788	22.7758	5.04685	62.5153	75.2237	88.6813	87.4365	138.472	132.922	35.9221	49.5562	72.6383	59.1434	51.8001	83.5465
90.40839768_454.059037___2415	19.5719	18.4497	19.4164	26.7464	39.8038	7.0679	23.4193	32.5075	32.2809	12.0632	26.6681	8.7665	5.08694	10.448	2.2899	14.5382	8.66299	4.53847	5.99258	9.33693	2.06963	0.0210019	12.7193	7.61494	15.5014	39.0545	15.8462	5.61401	8.15402	5.54455	9.49188	14.404	5.9011	3.42532	6.838	6.4045
90.43760837_406.7609076___7902	77.8692	27.4987	69.4465	93.0189	70.3336	132.238	77.2512	50.4898	68.3919	63.9381	53.0309	34.9269	61.0403	75.3055	57.7295	41.1057	30.1603	22.5725	23.8273	20.9194	22.6676	25.1944	25.3356	25.2588	93.6183	144.576	72.4082	56.0691	24.3773	60.5973	34.6702	34.434	64.0565	44.4698	43.7423	54.1098
90.57283875_758.0559042___2213	14.7673	4.57108	35.3508	13.4125	4.40148	24.8232	31.4774	14.6914	24.6223	16.2455	22.9399	4.42146	2.56629	5.3374	7.00013	14.7889	6.62807	6.88784	2.03099	4.71435	4.19198	11.6438	18.0028	23.2488	30.8805	44.4973	37.5993	11.2242	21.7792	26.7441	21.9704	46.8445	26.6253	193.151	163.633	123.932
90.57328779_1088.967293__[M+Cl]- 55.6041_24	235.702	288.89	246.279	164.639	267.007	174.692	229.754	183.138	171.077	301.766	198.977	227.255	20.3842	26.1813	25.2343	31.6885	26.1471	6.79459	24.0971	32.8317	25.0449	34.5781	17.8478	10.1806	113.066	164.943	102.22	96.598	137.324	126.511	117.228	104.414	155.703	86.5808	137.088	84.2359
90.65779474_411.7635321___8569	49.4103	55.8313	74.4519	58.0199	96.0569	93.3795	55.1627	30.1781	48.3322	36.4915	23.0844	35.3965	200.232	167.798	184.819	127.629	50.7634	88.5147	21.8512	85.2101	24.7489	48.1132	38.2066	30.3819	99.7311	211.741	144.841	91.2551	43.4044	119.737	15.997	54.6373	51.9083	45.134	31.112	25.8142
90.68237622_1093.13299___24	258.228	225.537	169.301	205.437	158.394	252.314	199.402	146.778	257.66	211.905	260.633	219.753	10.284	13.0792	16.0575	7.30566	6.53565	13.7131	8.03249	11.726	6.25533	13.8306	5.1461	10.1681	88.9742	133.157	137.852	70.9346	111.604	133.864	73.5382	85.2838	68.7158	68.8977	120.243	97.1614
90.77266731_412.6122334___8570	34.1586	32.1645	23.2214	17.723	92.5198	65.9059	15.569	28.8853	20.1627	16.0197	15.2003	13.1089	154.663	228.06	106.4	142.64	74.8855	152.066	29.4203	95.1299	40.7642	32.1134	26.3935	23.1062	80.3746	69.5335	87.1308	123.286	96.4939	100.326	22.4365	46.6695	20.9578	55.406	13.8528	42.0998
90.77699198_1094.76224___24	334.891	235.554	167.779	242.057	263.239	161.575	172.484	201.758	164.688	215.955	155.307	209.967	47.3484	31.132	36.4037	9.67091	19.45	17.9487	19.9126	4.64795	8.27183	6.85832	20.2276	20.1667	103.256	123.466	99.821	83.8949	128.128	89.0985	70.6528	40.7931	119.329	76.4818	66.7316	79.8476
90.79789861_758.3668189___2214	9.82598	4.63053	27.5478	4.46205	8.91714	3.54617	31.4774	22.0817	8.2232	8.12274	15.3241	4.43033	7.68765	13.3226	16.3336	2.46108	4.41871	4.59735	6.09297	14.143	4.19198	9.31504	10.2873	5.1664	15.4402	26.6984	18.7997	22.4484	16.3344	13.9116	15.7213	20.1539	32.5488	93.5138	40.5303	44.6434
90.88021781_411.9323193__[M-H]- 91.8904 [M-H-HCOOH]- 137.898_154	29.7087	51.1787	135.823	70.8921	40.225	63.8056	47.3701	54.1722	76.5259	32.4943	46.2522	57.2786	324.329	375.298	249.238	216.704	195.975	222.696	61.5947	133.597	83.9077	51.1993	92.3883	84.4587	119.246	142.241	160.422	133.063	99.5963	155.315	54.3899	82.2692	45.1961	106.209	20.7414	35.1135
91.00414005_413.0647221__[3M-2H]2- 61.3452_154	136.855	224.975	189.092	212.425	256.995	228.533	179.549	213.788	234.205	282.018	221.506	258.15	324.43	246.297	355.895	413.506	295.171	211.471	242.582	208.046	180.469	203.188	204.508	258.027	192.319	334.803	99.1795	230.447	252.66	215.175	239.014	234.07	199.395	369.442	256.224	215.756
91.00120904_1186.903664___9301	0.044486	564.918	0.0352303	454.824	514.967	412.066	467.22	0.0328174	0.0365954	466.304	435.815	495.905	312.726	466.506	357.646	423.295	434.584	356.23	381.608	349.962	376.13	345.776	391.376	412.708	650.838	380.546	706.76	564.651	378.787	442.029	663.656	649.707	742.4	554.523	0.0313307	478.529
91.00154562_145.4894608___8878	281.43	278.484	245.259	254.376	288.018	211.559	220.343	199.051	233.332	225.435	248.941	320.665	424.106	585.185	290.763	1069.73	399.668	251.614	526.419	177.916	788.725	454.6	805.352	357.669	381.68	304.689	339.825	292.681	294.475	272.602	285.264	252.359	345.397	360.39	370.693	252.16
91.03110276_1095.248342__[M-H-CH2]- 106.054_24	23414.2	17950.6	10651.2	9719.35	18309.6	15051.5	19385.7	16153.3	10210.2	18036.8	15502.6	14741.1	933.918	758.286	675.984	595.845	422.584	364.479	453.953	333.44	254.598	505.047	1094.34	866.408	5347.41	9527.77	5549.23	6895.71	5626.47	7342.83	4880.35	64.8536	8537.3	5128.53	6456.21	6614.68
91.02478679_763.3255762__[M-H]- 92.0296_43	698.241	930.87	869.104	895.856	400.351	1125.11	1330.68	1129.68	1004.76	1431.59	1113.52	1349.72	203.34	187.564	192.628	507.275	554.451	357.961	419.181	413.075	143.163	246.642	165.763	306.339	200.018	188.982	176.086	407.05	470.908	555.661	517.97	618.658	619.618	405.954	325.648	409.175
91.05697577_366.5612579___4	160.993	222.238	182.147	57.681	92.6477	77.4151	50.6172	33.0505	69.5184	52.2582	45.5869	39.3844	142.395	159.405	120.355	72.6279	75.7013	74.5355	49.7656	71.3377	71.8253	43.5936	71.1448	60.8854	152.092	138.203	136.589	81.0782	65.2194	69.3048	47.5582	69.2334	47.3553	51.4619	34.2634	54.701
91.05758754_330.6907909___44	107.001	68.772	65.5641	17.6787	17.5734	24.5527	19.4015	18.0364	20.0788	7.999	7.56978	13.0673	89.5844	126.531	107.843	9.80959	24.0126	22.9119	12.045	28.2256	27.1113	30.1527	28.2441	17.9358	64.779	90.9086	97.7711	28.3756	16.4552	22.3682	41.6578	23.2866	14.9339	17.3036	13.798	19.3852
91.11140086_411.8428171___8571	24.7052	46.5261	30.9618	22.1538	31.2283	54.879	27.5813	25.2471	28.1938	16.2471	57.711	26.5474	96.7156	199.512	239.347	107.618	57.4545	33.257	27.8106	58.1816	52.4329	55.4398	22.8192	27.8501	107.536	109.754	46.0444	94.3824	61.8468	84.0758	25.5952	78.9236	29.8855	26.5507	13.8276	19.3938
91.33478529_475.7637499__[3M+2Cl]2- 37.5748_2	142.317	114.23	93.2368	120.776	115.796	122.189	111.978	36.2322	56.3092	28.0278	71.4008	26.5962	40.4977	86.3176	63.8533	51.0657	36.5419	41.8395	17.5935	4.65943	14.4423	2.28651	17.7356	10.1227	97.0518	63.695	69.5792	108.504	117.521	93.583	75.895	96.0922	94.4398	70.265	71.1089	35.3191
91.31606307_374.4541035___6401	9.82225	36.9355	31.0528	13.3846	13.2816	7.07883	19.5586	7.25897	20.2074	12.1163	22.903	13.1776	107.815	61.6679	90.1665	7.29912	13.0249	15.9188	5.98637	0.0213417	10.3622	4.60544	7.64543	10.1775	37.2634	20.405	9.56092	16.9829	10.9202	22.231	12.7372	0.0264366	20.8168	6.8874	13.7697	12.8515
91.33859253_332.4585956___3712	9.77417	22.98	23.1961	22.2124	22.0477	14.0822	7.7915	3.62108	0.0365954	12.0396	3.80167	13.1148	30.3583	18.2748	9.137	4.85812	10.7957	9.06585	5.96515	6.99168	6.19911	2.29685	10.1757	5.07754	6.19314	17.9882	9.49637	8.43522	10.8627	22.1305	3.17005	17.3042	11.8169	24.0088	10.2569	9.58888
91.34576245_412.090924___8572	29.2788	27.5695	11.6107	8.86151	35.2456	64.0816	27.5813	28.8539	20.1384	44.599	34.6266	4.36962	48.4984	77.6587	83.0861	37.4686	52.4809	6.78679	29.8316	25.6319	20.6497	18.3505	7.61719	10.1396	31.3113	57.6042	28.7986	17.1051	65.7928	30.7609	25.5952	17.501	14.9427	24.3484	3.45689	16.1615
91.55846095_476.6263026___2	111.243	105.065	103.096	39.9458	109.403	90.6688	78.565	14.4549	32.2859	48.6885	72.6854	38.6398	25.3385	39.8352	68.1261	23.8288	27.2608	29.5	10.7069	9.30554	18.5664	13.7184	7.59867	7.60106	56.1716	38.9498	70.6254	112.887	77.1974	80.9762	117.718	121.125	71.4154	75.3473	67.1249	35.1152
91.55300925_375.2514034___1115	9.78855	18.4368	15.5264	0.0402612	4.42002	17.6318	15.5947	7.24722	8.06799	12.072	7.60868	8.78594	78.0809	65.1293	95.5129	14.5748	10.8364	6.80958	1.99231	4.67197	8.2765	6.89716	10.1809	2.54039	15.5008	27.0439	14.8754	14.103	5.45105	19.4198	6.34698	5.77708	11.8535	6.87625	10.2912	6.41496
91.75129954_325.8644182___2299	19.5484	9.2014	34.784	13.3143	22.0469	10.5612	31.1648	21.726	12.0891	12.0607	15.2122	8.75489	15.195	10.4481	9.14253	7.28991	6.49237	9.06634	11.9505	7.00248	6.19908	9.1939	5.08934	2.53886	94.1607	53.3725	41.2161	77.1697	57.0364	107.49	28.5822	64.1104	38.4137	27.4659	20.5398	54.3275
91.77686877_475.4912856___2	146.82	233.017	172.762	118.271	164.552	163.604	90.2116	94.706	84.055	114.476	90.6329	82.6141	365.038	521.465	442.967	444.59	519.64	236.256	202.613	245.465	307.152	211.315	166.33	158.979	160.833	130.676	90.5051	202.822	247.152	242.78	213.701	269.746	238.596	226.922	116.106	154.148
91.91480077_1190.741534___9302	199.469	204.461	0.0352303	216.808	251.49	185.093	267.731	162.541	254.382	183.035	105.845	78.1565	267.521	265.452	179.895	426.817	225.998	184.205	157.537	131.924	229.921	212.682	180.387	244.217	135.727	66.2762	82.6715	0.0257658	109.107	61.4052	140.158	121.05	168.004	0.0314148	150.39	84.5146
92.00391905_475.4088019__[3M-2H+K]- 18.3554_2	132.191	143.116	161.345	119.34	131.232	185.726	98.3189	55.0783	98.413	63.9848	91.4736	65.5183	340.139	596.088	368.198	395.112	452.367	384.917	309.537	262.169	203.49	134.978	170.626	171.718	118.009	108.522	103.383	187.476	218.317	126.3	203.623	209.382	274.17	135.574	129.535	193.541
92.02638904_1095.730207___24	22920.3	19168	20216.4	20014.1	20166.5	18194.4	18849.4	15899.2	10208.4	16221.9	18293.7	19035.3	512.201	436.788	343.114	238.105	318.748	146.92	319.153	406.98	350.647	370.542	445.843	310.144	5178.05	6238.35	5569.91	8932.29	6333.71	12032.6	5481.72	6596.88	7334.9	4921.41	6193.98	9567.15
92.02829355_347.0406619__[M-H-CO]- 121.03_35	177.85	105.735	118.608	97.4763	79.3024	88.996	86.6329	115.542	96.6392	129.945	142.286	130.947	157.455	206.93	150.838	41.1708	69.0077	43.0498	57.6395	25.601	37.0784	71.0129	70.4014	63.2747	75.0482	60.0061	80.7943	45.5704	35.2813	47.64	73.7906	61.3096	47.873	24.307	72.7347	77.6906
92.03040916_142.493657___229	53.5817	59.3507	73.2254	61.8697	52.6177	66.5615	46.5123	46.7809	52.0476	16.014	34.0686	30.4772	15.162	33.8864	25.0299	19.3816	12.9533	38.3809	21.9065	134.949	18.5529	34.342	30.3967	25.3347	56.8141	39.219	19.4033	40.2082	35.5475	38.9069	38.8974	61.8566	45.3586	31.5167	34.9881	57.9897
92.23097866_475.4886109___457	14.6899	76.6311	31.7021	48.8112	143.143	78.5792	38.9926	62.4221	41.0054	81.3687	45.6799	17.4716	188.122	210.139	231.839	181.624	123.93	186.021	82.7382	160.898	141.018	112.987	88.9726	132.784	76.834	47.8594	65.3414	89.2809	102.128	125.445	125.03	128.721	111.812	86.9208	94.3808	76.0901
92.22480829_408.6359804___9222	43.813	50.414	38.6374	75.2891	132.839	84.2044	58.2275	112.13	36.6912	31.9653	64.4019	21.8261	102.729	109.591	116.84	47.4038	39.6378	77.1752	37.6707	32.5422	24.6981	32.0188	28.6753	27.7967	49.2086	59.7337	39.6746	73.8336	37.9305	60.1203	37.8203	40.1752	38.2701	69.8027	34.0592	31.8438
92.45447509_474.8204655__[M-H]- 93.4619_2	34.2763	41.4611	31.0275	50.3428	90.6266	66.8873	46.0299	27.5606	28.7038	35.9915	30.4533	4.36789	106.478	121.434	98.9026	125.839	86.3998	95.8725	62.8898	72.5634	72.0391	20.6587	49.4063	90.6874	15.4446	35.9645	15.7736	71.6397	63.4368	67.6799	68.6558	83.9015	53.7135	20.5259	55.3963	26.3849
92.45449966_410.9367186___8573	19.7315	46.4375	31.3464	49.8764	36.198	73.0322	39.3369	73.034	69.3033	28.3827	53.76	26.5489	45.4567	102.114	96.3043	53.1923	74.1321	51.6575	25.8906	23.2445	26.779	20.5982	17.7339	10.1052	46.1807	32.8552	58.4724	30.8418	43.3543	72.3955	28.3651	28.6908	41.2182	30.781	34.06	31.8447
92.67804538_410.0977461___9279	54.3499	32.5604	39.2543	72.5731	93.6726	119.816	63.0466	83.8075	53.0877	32.0362	37.9864	35.466	92.8739	68.2431	92.9852	48.4112	68.044	60.8645	19.8682	25.5989	16.4983	22.919	30.4363	12.6622	48.8797	48.5071	50.4213	22.4565	46.1155	72.8032	22.0858	34.4685	17.6856	23.9676	13.6392	44.6338
92.68446673_475.1180713___458	24.4831	32.2475	35.3528	13.3121	39.7759	28.1631	23.3605	3.67189	12.3016	27.9934	11.406	21.8394	57.9997	68.8344	54.8784	53.3908	30.2289	58.8075	13.9138	18.6132	28.8797	13.7197	20.6838	12.6356	18.4846	11.9717	22.083	2.80381	35.2114	22.0953	50.4485	25.8445	38.5087	34.2099	27.248	22.3167
92.91749471_126.8086203___8071	24.6405	32.3667	7.78477	13.362	8.85294	24.7281	15.653	18.184	16.2301	4.03975	11.4912	4.38907	72.7868	375.587	0.0209605	67.3063	0.0198348	24.6565	324.165	0.0213417	142.198	29.5575	246.264	223.061	27.6749	11.9198	28.2843	39.1249	16.2053	5.49292	28.3103	22.9096	29.4032	27.2627	23.8094	22.2674
92.9222968_1203.628942___9632	0.044486	0.0417716	0.0352303	0.0402612	0.0400679	0.0319682	0.0353867	0.0328174	0.0365954	0.0365366	0.034555	0.0396846	0.0232039	0.0238966	0.0209605	0.0221872	28.4812	65.2578	50.39	65.3434	23.0104	0.0210019	301.629	53.8621	0.0283566	0.0274813	0.0290008	0.0257658	0.0249155	0.0253439	0.0290452	0.0264366	0.0271353	0.0314148	0.0313307	0.0293344
93.01174151_1093.106636___24	7463.45	4694.31	4215.03	6248.65	5536.98	5589.5	5219.91	3489.2	3772.38	3862.3	5197.34	3697.19	201.439	278.486	208.254	239.312	218.01	209.474	241.619	172.201	200.62	228.778	257.715	181.959	1778.44	3015.49	2896.83	1787.59	3113.93	2185.57	1357.97	1352.98	1773.66	2224.27	1860.1	2887.29
93.03535797_151.6694133___6721	617.039	637.062	557.885	205.606	314.671	247.312	148.786	134.636	117.871	102.077	118.594	158.428	1321.32	1047.97	403.938	437.259	192.305	149.278	202.252	87.9813	175.455	200.693	80.7667	83.2311	323.7	318.28	362.919	220.406	210.248	271.857	87.4491	93.7476	141.891	83.8489	66.3711	83.6804
93.03629947_226.9480158___6505	73.894	106.273	54.3939	85.004	97.5208	70.8965	53.0349	65.4434	60.3942	64.8591	103.253	52.8418	1120.73	1084.92	1003.78	501.078	601.364	550.427	267.273	278.143	267.566	184.404	244.832	194.522	160.604	238.039	222.776	198.019	203.959	291.466	149.205	161.686	187.653	69.8645	97.7474	91.1739
93.03633878_442.1732869__[M-H-CO2]- 138.036_73	144.559	105.723	109.56	765.304	938.972	797.935	146.769	120.55	122.446	136.274	151.689	129.009	121.559	168.761	146.552	248.279	216.356	224.067	209.973	242.068	202.493	117.699	135.446	141.757	456.156	340.16	333.976	1134.67	870.768	1118	246.966	289.531	279.126	469.516	366.497	448.005
93.03602116_299.4974387___3394	180.494	242.192	180.966	97.7291	127.696	71.8448	101.085	104.856	76.3354	92.6127	88.737	131.377	265.4	263.667	275.825	147.817	165.993	131.583	79.2283	72.2613	80.2475	273.632	275.782	337.279	433.579	561.764	487.976	109.886	113.956	146.417	111.199	168.895	159.972	297.078	257.425	339.479
93.0366108_345.2405187__[M-H-C6H10O5]- 256.094_35	221.941	236.618	185.446	112.109	187.006	182.668	165.116	113.104	150.154	105.405	121.787	99.3495	376.824	491.074	348.468	65.1868	140.542	119.84	53.6048	30.1891	65.8466	52.617	43.5717	48.5987	236.236	251.312	191.237	110.713	104.054	111.727	57.5659	95.6329	89.4658	93.5981	72.4857	98.8238
93.03656087_543.0661002__[M-2H+Na]- 72.0524_50	470.883	424.295	431.396	109.707	165.932	103.369	120.967	96.7147	155.277	115.263	124.081	103.781	68.3627	89.8253	86.0714	34.3001	54.6697	41.0373	34.2452	28.1971	31.3278	69.438	53.7761	84.5036	326.96	355.394	375.898	91.2301	79.3774	109.112	95.8174	102.55	98.595	122.044	110.304	64.4825
93.12847399_434.6189818___9	700.348	690.571	895.522	62.7666	57.9682	71.1986	31.5132	25.1846	40.157	20.2667	30.7874	13.2402	15.3756	13.1432	9.23109	9.79387	15.7767	22.8756	8.04365	7.07118	4.17464	18.5337	17.9367	10.2411	6.24912	24.2328	12.77	11.3496	19.2013	25.1436	3.19446	29.0736	20.861	13.8476	10.3691	6.46968
93.1240399_500.4474452___599	97.2437	90.455	101.933	30.9165	39.5392	34.9891	23.2947	21.6568	24.1327	3.98621	7.56351	4.34203	12.8228	2.63499	4.62533	7.34129	8.74952	2.2856	10.0516	2.35308	2.08821	9.23688	0.0232272	5.11832	3.08433	24.2629	9.46074	17.0395	0.0249155	5.6042	3.1833	11.4769	14.7043	13.8273	3.44774	16.1538
93.14109951_411.3984037___8574	34.5301	41.7938	66.3792	62.6226	71.2624	84.8118	47.2043	43.8204	48.92	52.6227	38.4	22.0518	50.5074	90.9336	54.6267	48.3041	62.3914	45.0998	60.3111	25.5423	57.6189	25.1487	20.241	30.3157	52.9538	80.6447	69.2541	47.6645	65.0314	90.9212	37.8202	54.5125	44.1624	51.3017	40.8564	47.767
93.35930866_413.0154766__[M+Cl]- 58.3867_154	52.0362	90.4462	130.385	48.8107	123.72	97.9255	144.064	99.8984	65.1199	148.5	123.798	53.004	53.6716	69.202	41.4266	51.4855	81.184	52.5188	14.0523	25.8687	20.8406	11.5762	35.8698	20.472	65.4305	42.2985	38.2107	68.1602	60.4356	60.3369	38.2625	36.6626	17.8691	50.9923	6.89173	41.7651
93.34748794_435.2851267___9	613.854	621.353	867.348	22.1552	79.2693	52.7619	42.7946	46.8254	24.1202	16.0417	0.034555	30.5247	15.4324	10.5489	11.5575	7.35777	10.9582	9.18298	6.0431	0.0213417	4.1816	9.28454	2.56659	7.6934	18.7788	24.3194	12.7945	19.8949	22.0194	19.626	15.9989	8.73734	5.9703	20.8102	10.3871	6.48168
93.35415108_500.4401186___3	63.2686	27.5903	69.3634	17.6972	43.1577	31.5338	15.5527	21.7183	20.1675	7.99282	7.5747	4.34896	7.70664	7.91799	11.5852	0.0221872	4.38286	4.58023	0.0182778	0.0213417	4.18365	0.0210019	5.12933	0.0232341	9.40017	18.2256	25.6228	14.2259	2.74468	14.0356	0.0290452	17.4793	2.98683	6.93835	10.3624	3.2366
93.39756083_668.931747___767	0.044486	0.0417716	11.6048	20.4478	31.8972	31.5918	27.2164	52.8581	32.3227	4.01531	3.79039	4.36013	10.2201	2.64718	9.28504	4.90203	6.57811	11.4473	8.06189	7.06971	8.34408	6.94499	10.2331	2.56686	0.0283566	3.02866	18.9627	78.2646	48.9744	258.482	19.1761	14.4572	23.8013	0.0314148	0.0313307	3.22855
93.4615648_413.674557___154	24.399	50.5442	69.1553	70.8068	241.06	139.689	199.997	228.952	154.168	113.621	38.0008	106.159	28.2599	35.0373	47.2561	31.1998	41.6302	39.02	16.1387	23.3017	14.6671	13.9599	12.8769	18.0088	34.4439	42.5236	22.3594	54.2734	35.8287	19.6119	19.2313	32.0266	17.9259	34.7196	13.8528	19.4813
93.58419495_413.8990687___8575	69.2403	32.5137	61.7785	57.4654	159.644	223.126	227.735	144.869	135.345	226.025	173.865	189.292	96.7735	59.8812	134.124	113.596	101.089	85.9446	40.1452	51.369	35.728	27.781	81.2277	63.9605	37.4459	136.863	102.129	122.356	115.039	151.875	79.9718	78.5188	83.1916	102.905	44.8653	79.5164
93.57607952_434.5541591___9	338.686	339.599	413.887	17.7445	39.6877	31.7007	42.855	16.2598	40.2607	16.0625	26.6431	26.1974	15.2342	15.619	16.0063	12.1116	21.6348	15.8637	5.96785	11.6572	4.12978	11.4647	7.60378	10.1469	18.851	12.0026	25.6361	25.6274	21.7363	38.7477	16.0276	2.91841	11.9627	10.4243	24.2811	9.59704
93.58787959_484.6232012___100	390.625	364.241	521.912	227.278	261.623	229.701	130.075	152.474	191.849	126.222	121.155	94.7734	12.6549	36.3941	50.1683	14.5091	15.1055	9.02798	7.94846	13.9552	2.06224	9.13397	7.59464	12.6494	18.5125	32.9186	3.15129	22.4429	18.9712	41.8308	17.5658	17.19	32.3453	34.1803	17.0221	6.38197
93.62906386_668.9590017___768	9.73701	9.14959	7.7365	22.06	30.8397	17.5263	15.5523	10.8366	16.1397	4.01531	11.3712	0.0396846	7.66511	2.64718	4.6354	4.90203	19.7343	0.0207037	4.03094	4.71314	0.0189364	9.25999	0.0232272	0.0232341	9.26473	3.02866	9.48135	5.6136	46.6225	114.589	3.19601	8.6743	5.95031	6.87703	6.84514	3.22855
93.69731635_402.9629954___266	9.74437	41.2943	19.3086	75.3338	122.208	160.774	120.447	137.604	134.226	157.965	94.195	107.766	35.9514	40.0227	48.5509	41.7315	30.6707	44.8687	16.1263	14.1548	27.1894	12.7838	18.1156	24.6187	40.623	42.5189	45.9067	45.4101	27.6741	47.6077	22.1085	28.6155	14.9435	27.774	17.2846	32.3564
93.81328331_413.8678489___8576	19.4955	32.1252	27.0585	39.8288	118.594	62.5753	168.317	84.5911	115.664	104.127	92.1175	39.2771	160.664	127.057	116.695	108.582	100.106	106.069	49.0674	70.4617	100.235	42.026	34.3636	30.8083	101.022	120.982	95.203	103.208	145.781	157.502	130.325	112.336	74.1314	99.8832	80.7597	112.324
93.79914524_434.9534017___9	200.739	186.146	194.121	66.6522	66.1462	49.3122	38.9591	21.6412	36.3367	16.0625	38.0616	30.606	35.5464	26.0317	18.293	4.85116	10.8174	22.6624	5.9761	9.33904	8.27089	9.18667	12.6894	20.2938	18.851	33.0072	6.4219	17.1189	16.3022	27.677	12.8474	5.84873	17.98	10.4447	10.2886	9.59704
93.81823979_484.1812967___100	574.235	409.613	435.127	233.192	221.586	165.827	96.5937	127.113	112.073	84.9775	166.627	91.5429	27.8409	49.392	47.1588	7.25455	25.8951	6.77098	9.93558	16.2811	14.4357	6.85048	15.1893	2.52988	18.5125	14.963	31.554	11.2214	27.1018	27.625	25.1776	17.211	14.7207	23.9568	27.2354	25.5279
93.91191868_1193.514067___9442	0.044486	0.0417716	0.0352303	0.0402612	0.0400679	0.0319682	0.0353867	0.0328174	0.0365954	0.0365366	0.034555	0.0396846	106.877	81.8142	0.0209605	84.681	92.5643	0.0207037	92.2414	0.0213417	93.7383	0.0210019	40.8751	0.0232341	0.0283566	0.0274813	0.0290008	0.0257658	0.0249155	0.0253439	0.0290452	0.0264366	74.1115	0.0314148	0.0313307	0.0293344
93.96433762_955.8623577___8430	29.1388	41.167	19.1866	13.2206	17.5155	27.9468	50.2022	35.6747	19.8787	25.7681	26.5282	26.0175	30.4822	33.9589	201.28	203.116	96.4192	11.3023	92.2865	4.67992	89.8729	45.254	17.813	104.381	52.5972	73.348	31.9894	28.3669	240.723	64.8811	25.292	31.581	35.6939	37.5952	17.0232	16.2904
94.0176897_375.4646113__[M+Cl]- 59.0529_8	48.8705	51.8332	27.0861	8.88053	13.2406	31.6911	11.6796	21.7446	8.06885	16.0727	7.59768	4.3793	282.136	78.6694	704.301	16.9829	25.9706	28.7831	9.94785	9.33007	4.13208	11.4783	10.1811	15.2424	40.2418	164.319	78.2991	16.8974	13.6022	19.8432	19.013	25.9588	5.91783	41.1969	13.701	12.8091
94.04035708_1095.92805___24	1510.11	1783.46	1302.51	2158.72	2433.11	1241.57	1368.95	2078.93	1463.85	1422.45	1718.63	1601.83	45.7209	36.8258	48.4535	34.3578	52.5873	58.7126	44.426	40.1352	44.0305	34.7538	48.2997	45.5767	830.078	857.01	864.563	577.382	974.131	864.189	790.323	645.868	795.589	758.483	901.284	856.216
94.03988788_414.7954734___8577	342.723	200.136	313.019	218.598	612.748	672.729	347.216	391.517	434.994	162.293	119.416	200.137	16621.4	18554.3	15692.6	22467	20667.7	2979.94	12076.5	12248.8	14733.9	10490	14528.8	11410.2	16658	14075.4	15775.7	23565.4	20942.6	22761.2	14938.9	1186.67	18590.8	14292.1	9648.6	14402.6
94.05395333_484.6787511___100	260.401	226.659	170.405	173.052	72.6137	115.626	55.7403	28.9952	40.003	89.2771	53.1671	30.5285	12.6718	26.0371	22.8403	16.9497	6.48235	13.542	0.0182778	13.9741	2.06224	2.28676	10.1262	2.53387	6.17901	29.968	18.9324	14.027	24.4254	24.8886	9.45267	14.3425	14.7207	10.2672	6.81945	3.1955
94.14862112_414.7374505__[M+Cl]- 59.1804_154	4.88118	18.3797	34.8857	17.7433	26.4314	42.188	19.4586	36.0946	20.1861	28.0707	22.8091	17.5011	2699.53	429.629	312.194	932.025	82.038	2953.55	71.5403	1650.05	481.953	1240.12	1878.94	775.817	2659.89	315.291	2253.52	3706.82	2865.91	1355.09	1912.95	2228.07	2858.9	1959.85	1476.78	1964.88
94.24367123_375.2514034___1106	4.89427	9.23332	31.0024	4.44656	8.84004	10.5791	7.79736	21.7417	8.08144	4.024	11.413	8.77178	465.625	224.71	570.559	26.7027	27.1785	20.4291	5.97694	4.67197	0.0189364	4.59811	2.54522	2.54039	44.6902	28.1005	31.7385	8.46181	10.9011	11.0963	12.694	8.66562	20.7437	10.3144	6.86083	12.8294
94.26576301_414.9311514___8578	217.349	321.025	237.749	322.675	445.818	585.853	326.592	268.661	258.785	122.693	109.846	131.7	21058.1	20713.6	17141.9	23806	21809.1	20571.3	12724	13529.9	15822.4	12550.9	15357.4	11315.7	16614.6	16622.9	16357.6	22893.6	19889.8	23302.9	15522.1	16862.9	17955.1	16391.3	14047.5	16134
94.26606908_484.3967877___100	196.303	129.899	121.285	78.2348	66.2187	74.092	81.0847	49.3719	25.0096	28.4698	41.7997	47.3711	25.3099	56.033	36.4861	30.5535	34.7156	14.7938	13.9098	6.97761	22.6847	13.2169	5.07121	7.58965	18.5125	23.9408	22.0902	28.0536	29.8119	13.8125	12.6046	14.3414	26.4643	10.2666	23.8309	25.5279
94.41260611_782.6835825___8826	4.86554	9.13819	3.87329	8.82041	4.40012	3.50138	3.88466	18.0977	8.08164	16.0462	7.54696	0.0396846	5.12597	13.2309	9.30634	2.44843	2.19509	4.59826	8.09034	2.3579	2.09338	2.32785	10.2791	7.72429	6.12117	15.0393	3.11569	19.3474	11.0332	14.0397	12.4152	143.856	71.8369	108.684	98.1656	25.7866
94.45965763_450.1105037___2830	29.3438	0.0417716	7.74658	17.8212	52.9968	45.8967	19.5138	27.4818	36.3104	16.0932	11.426	13.1475	5.08653	2.61038	6.85501	0.0221872	2.16538	4.53144	0.0182778	7.01522	0.0189364	0.0210019	5.08266	5.07027	15.4785	6.00984	18.9886	11.2482	5.43724	13.8612	9.51125	2.88154	2.95157	17.1393	10.2763	12.8199
94.47208943_375.2552592___1116	29.3657	36.8736	19.3765	17.7862	13.2601	35.2635	3.89868	0.0328174	8.06799	4.024	15.2174	8.77178	170.029	75.1545	356.782	19.433	23.8058	11.3331	7.96925	4.67197	0.0189364	4.59811	5.09044	10.1615	46.5024	65.4135	53.9554	19.7442	13.6064	30.5149	6.34698	34.6625	20.7437	50.1359	33.977	30.5823
94.49525507_414.9397617___154	136.919	138.551	140.782	207.367	300.089	244.049	158.538	214.821	200.919	96.7113	69.8896	56.8023	11648.1	9060.71	10026	12360.1	8856.15	11433	6316.17	7325.61	6813.94	5559.92	7356.65	6469.28	6977.29	9108.58	8176.92	10326.8	11586.8	11902	6336.24	10073.3	8730.68	7873.02	5759.56	7389.52
94.69280222_451.1712151___9584	14.6522	13.8362	27.1232	35.5961	26.4201	49.4376	35.1239	21.6367	25.3864	8.0324	11.4251	0.0396846	10.1739	2.60676	4.57041	4.84715	4.3311	2.26577	3.98841	9.33829	6.19984	11.4736	0.0232272	2.53516	3.09584	15.0231	9.49416	8.42263	0.0249155	11.0895	3.16425	2.88129	2.95122	0.0314148	3.41986	6.39962
94.72354722_414.9397617___8579	53.693	55.1392	100.696	166.66	96.9059	146.613	67.2191	96.8164	111.231	54.4502	53.2213	26.2165	3583.85	3660.47	3159.62	4758.21	4039.42	3941.04	2109.36	2374.81	2637.72	2108.01	2916.18	2434.29	2824.3	3134.18	2122.26	4970.47	4044.59	3653.51	2677.19	3647.06	3056.19	2726.6	1818.88	2769.19
94.84367604_415.1878078___154	54.6606	54.9821	70.5749	13.2908	17.621	56.1836	11.6752	10.8284	12.0958	12.0146	7.59144	4.36941	219.309	171.94	178.339	244.307	289.974	112.953	91.3622	170.058	161.037	82.7707	140.462	62.8971	160.892	191.167	154.808	235.684	198.012	224.794	233.277	149.189	185.763	122.429	177.703	134.001
94.92549648_451.1720912___9585	24.3881	22.9954	11.5932	8.88707	96.9432	66.823	42.8016	61.2215	28.1632	20.0297	15.1927	30.59	7.60741	18.2013	20.5159	12.0857	21.5949	6.77974	15.9076	6.99425	14.4267	9.15309	15.2041	7.5848	40.1425	2.99628	25.2506	22.4011	24.3603	30.4091	37.8725	37.36	26.491	37.5971	20.4927	25.5646
94.95352443_414.9277183__[M-H]- 95.9584_154	24.4059	45.9494	168.068	31.0119	97.2593	90.2825	35.0255	46.9229	56.4469	44.5741	38.0152	4.36941	1256.99	1052.34	899.57	1290.11	1189.04	1137.52	699.832	915.423	802.159	544.732	667.867	766.787	822.811	840.194	1162.08	1271	1312.37	1030.01	815.797	1236.01	753.467	911.61	651.111	704.362
95.01602027_254.6325994___8388	315.414	362.625	308.897	261.221	266.534	285.408	278.058	184.123	234.773	213.541	193.326	206.153	55.7669	52.3627	73.1451	60.8307	67.1834	54.5464	63.8096	77.1041	78.6589	73.7613	96.9286	70.4174	71.3555	88.2293	114.725	140.075	82.7834	86.7656	100.201	109.148	113.947	148.473	93.9491	159.174
95.01614405_374.761755___8	78.1929	142.643	65.8802	62.2519	119.166	70.5271	129.365	123.029	84.723	124.744	144.565	153.506	89.3656	49.5632	54.9112	48.5226	50.2425	56.7475	99.3168	44.3837	83.3138	91.1232	86.67	127.919	46.4328	80.3347	50.7047	104.362	68.132	102.416	140.21	151.379	109.645	109.858	117.324	125.086
95.02711958_980.344567___21	1155.52	1136.6	780.811	1185.76	901.3	895.293	700.523	898.816	1008.09	993.765	921.392	715.835	20.37	44.3996	38.9431	17.0609	21.7679	18.0808	24.0728	39.9589	45.7873	29.9292	60.0856	7.61934	665.868	741.731	809.399	364.255	809.895	708.45	618.456	526.071	857.082	715.781	718.233	1147.6
95.02716789_1103.542197___24	2029.48	1241.12	1277.05	1354.75	1826.53	1454.98	1240.37	1256.04	1524.52	1262.44	1136.72	872.208	86.8129	75.8683	71.1318	65.7543	56.7561	69.9312	60.2585	56.301	60.1112	97.1954	122.538	48.2674	656.166	769.705	872.649	665.173	587.609	668.234	1222.1	568.93	870.528	1023.89	627.822	634.528
95.0871748_758.7347985___2215	4.82126	18.1775	19.2681	13.1344	8.75078	6.96045	34.2319	46.8481	16.1018	19.9356	11.2591	21.7003	10.3373	18.7946	11.7367	19.8502	8.88807	6.93746	22.4733	4.74996	6.32537	11.7127	12.9379	12.9929	33.3153	51.0061	15.3787	30.3066	16.5077	39.3218	30.8444	22.584	20.3184	66.9723	42.6557	57.9157
95.16459296_482.1194135___4808	152.294	163.118	229.695	148.938	188.592	221.814	145.08	148.121	63.5137	133.765	124.267	95.3535	156.07	177.383	181.036	93.2814	224.711	133.962	130.954	127.491	142.945	77.5173	120.641	114.399	36.8538	32.2994	25.1577	22.3625	40.5062	38.5471	21.9896	14.2982	16.4227	53.565	16.9643	22.2511
95.17683948_414.9294349___154	94.7747	84.4241	122.338	22.1514	52.8629	38.6723	23.3504	46.7533	44.3511	40.0486	30.4122	8.73882	395.334	244.527	323.321	578.645	295.13	410.305	269.691	259.777	316.321	221.578	407.893	257.179	417.434	401.27	423.064	549.654	440.988	354.917	373.648	386.436	439.549	364.3	271.198	475.972
95.30466303_757.15765___2216	14.739	13.8916	7.85574	8.9241	4.45857	7.09233	15.7387	18.3642	16.4148	12.1841	11.47	17.6858	7.68765	2.66453	14.0003	7.38325	8.82618	2.29595	4.06198	7.07152	12.5759	13.9726	5.14365	18.06	9.26415	17.7989	15.6664	16.8363	2.72241	11.1135	15.6932	22.9881	23.6254	55.0436	50.5833	61.2424
95.38225784_296.8227362___5017	19.5395	27.569	3.8662	8.88397	0.0400679	7.03439	7.78287	0.0328174	8.04211	0.0365366	0.034555	8.75643	10.14	2.6182	4.57112	0.0221872	2.16632	2.27065	0.0182778	0.0213417	2.06641	4.60156	0.0232272	0.0232341	154.455	378.677	196.48	2.82485	5.44436	5.53675	6.37193	2.89672	11.8819	0.0314148	0.0313307	3.20356
95.37048151_325.580557___2300	9.7742	9.20343	23.2217	13.3143	26.4563	24.6428	11.6868	25.3452	4.02996	12.0607	11.4091	26.2647	5.07178	5.22346	11.4128	2.42997	0.0198348	11.3474	3.9835	4.66832	8.26544	6.89543	10.1779	7.60648	41.9955	85.6956	70.7489	58.1206	65.0979	72.1614	34.9338	47.8455	42.3584	37.3926	37.6563	16.0009
95.39399203_475.7238067__[M-H]- 96.4029_2	166.396	168.304	238.338	196.45	157.483	275.429	169.133	180.505	123.932	143.932	125.322	112.69	228.861	388.688	245.744	338.075	223.532	104.565	193.091	174.431	243.188	57.6475	157.227	147.368	73.2749	29.1906	49.1437	80.1239	49.9214	108.81	90.9903	83.4643	88.939	65.8715	56.3158	55.8845
95.40702827_414.6128282__[M+Cl]- 60.4343_154	34.1683	87.3038	145.013	26.5816	96.9153	31.641	70.0511	21.6567	28.2234	16.0194	57.0228	17.4776	309.362	278.523	157.116	284.067	100.103	251.424	103.548	158.909	145.613	79.607	152.56	158.43	207.54	197.056	233.903	317.839	349.783	302.958	177.389	226.058	229.605	266.254	76.5106	133.367
95.53274889_414.5590027__[M-H-CH4]- 112.579_154	107.253	74.464	100.451	17.7001	26.4	17.5574	15.548	7.2108	16.1084	16.0194	15.1829	21.8196	195.594	111.626	59.4356	174.263	154.978	182.571	26.8917	46.3826	96.801	35.8367	101.382	50.8261	82.892	132.671	132.763	183.07	90.9286	130.532	102.705	98.6879	132.213	112.552	86.3124	184.737
95.59710907_326.0538864___2301	4.88051	0.0417716	3.86489	8.86473	66.0539	17.5785	15.5616	14.7458	12.0735	33.5444	18.9886	8.74247	2.53249	10.4339	4.5651	4.8532	6.48211	4.53317	3.9781	6.99279	4.12731	4.59072	0.0232272	0.0232341	54.4388	38.9687	48.9249	31.3736	35.2614	72.2998	38.1096	41.692	20.7133	31.3026	13.6932	28.7616
95.61940899_475.6445736___2	44.1287	115.273	163.638	146.786	134.787	114.24	92.7786	67.0726	87.7281	130.706	87.4328	75.3559	153.94	250.507	178.948	206.485	190.105	194.877	105.798	110.115	122.257	86.353	96.7792	114.955	49.1065	38.908	40.2309	29.116	63.3566	44.1905	83.9594	19.3668	121.505	68.5313	51.778	35.1241
95.62659416_414.5144149___154	107.836	83.3732	102.893	13.2751	48.4602	59.7813	50.5968	57.7598	16.1296	28.034	41.5072	8.72783	107.151	212.745	157.166	176.349	92.685	119.482	72.4085	123.765	76.6827	113.9	135.935	111.139	176.655	88.0489	226.321	132.162	97.3089	200.142	94.4586	158.607	96.1375	163.188	136.33	114.243
95.61508276_297.0114889___5018	19.5395	22.9742	19.331	0.0402612	0.0400679	3.5172	3.89143	7.24191	0.0365954	0.0365366	7.59428	0.0396846	10.14	2.6182	6.84804	2.43068	4.33265	9.0826	1.99463	0.0213417	0.0189364	4.60156	10.1816	0.0232341	144.143	326.633	163.789	0.0257658	0.0249155	0.0253439	0.0290452	5.79345	0.0271353	3.4328	0.0313307	9.61069
95.67794118_414.9138961__[M-H-CH4]- 112.715_154	82.2145	41.3544	30.9664	8.86055	35.2419	21.094	3.89173	14.4378	8.06384	16.0003	15.2061	13.1082	113.011	126.794	128.059	105.549	200.122	149.347	49.2097	101.298	114.872	60.1198	101.107	75.3031	81.4764	158.404	100.568	157.41	186.895	69.6205	152.029	68.8965	167.43	57.6569	61.9522	63.8187
95.85573392_414.1449617__[3M-H+Cl]2- 52.5835_154	24.3694	41.3648	74.6709	13.2915	70.4036	49.4162	77.7465	57.6972	32.2593	60.0014	30.3639	21.8471	167.494	204.624	106.841	218.526	166.192	177.418	53.0224	129.216	122.781	97.154	129.098	98.3482	88.972	141.714	95.9652	156.875	204.798	129.218	146.024	68.0465	73.6608	87.7012	112.396	84.4964
95.85056013_475.2077032___459	48.9662	71.78	100.864	66.5607	110.961	119.606	81.8844	58.7502	76.9687	49.2047	49.4866	73.6822	131.846	98.2632	137.843	87.1119	113.968	109.481	36.5579	92.6004	85.3428	66.7143	96.333	76.4344	43.245	5.98585	25.2377	39.9579	40.6286	61.3527	44.0239	48.4025	44.1524	34.3056	33.3946	67.4996
95.84999725_297.0114889___5019	19.5395	9.18967	27.0634	4.44198	4.40821	0.0319682	0.0353867	7.24191	0.0365954	4.02597	0.034555	4.37822	2.535	5.2364	9.13071	2.43068	2.16632	2.27065	1.99463	2.33279	0.0189364	2.30078	2.54541	0.0232341	61.3357	216.633	94.6506	0.0257658	5.44436	2.76837	6.37193	8.69017	2.97048	0.0314148	0.0313307	3.20356
96.00249544_414.6128282___8551	43.9896	50.6253	65.8035	35.4422	52.9346	49.2317	35.0752	36.1446	16.1508	80.0971	38.0032	21.8471	123.031	110.766	70.9982	98.1188	144.117	85.979	66.3331	103.824	74.8178	13.9589	96.6574	75.792	103.202	147.743	52.6496	141.502	116.823	105.071	44.2978	62.9812	91.508	79.6809	46.3397	74.5712
96.02855826_123.8722858___7313	14.5873	22.8461	7.70154	8.80576	240.309	13.9698	7.74288	14.3481	12.006	11.9917	18.8848	13.0195	0.0232039	7.83918	0.0209605	136.09	0.0198348	6.78548	107.936	126.083	223.015	13.7664	151.349	0.0232341	15.5051	18.0212	12.6741	8.45663	16.34	30.4563	9.51051	14.4407	2.96446	17.1686	6.85597	16.0316
96.05781579_1110.780864___14	2526.83	3567.82	2861.45	3859.8	3469.69	2411.7	2411.89	3298.89	2492.08	5897.2	2078.14	3153.75	33.2315	68.3529	53.0265	63.6028	35.0368	72.7073	43.7264	49.4294	60.2852	55.4826	142.504	114.807	1132.55	1295.58	1101.01	999.937	1235.48	1396.27	1130.56	1032.63	1068.16	1165.71	2391.13	1280.46
96.05001901_913.4047707___4437	527.776	259.436	52.7844	235.168	208.296	227.409	256.399	99.0938	301.712	118.785	157.102	327.721	30.8112	50.0292	39.2731	24.5784	37.253	36.5193	24.2155	37.7753	43.9946	53.348	28.2519	30.7298	289.009	281.192	1895.1	156.773	111.244	137.985	124.666	158.962	139.883	209.629	827.957	167.132
96.07762999_413.1031662___8561	68.2343	41.3038	38.6549	70.8068	96.805	49.5875	50.5352	46.879	32.2193	48.0011	41.7504	30.5488	162.477	162.713	84.5063	138.175	85.8097	107.079	42.7253	50.8326	39.7276	46.6581	61.1024	96.8375	65.6384	93.9511	115.803	76.8126	94.7695	162.236	70.37	43.3118	42.7886	48.2439	84.763	92.3955
96.08649185_475.1302411___460	39.1729	18.4272	35.3528	17.7495	70.7128	53.2394	23.3955	22.8146	12.3016	28.0278	22.84	13.1037	56.0227	114.077	94.4805	53.6311	84.0569	94.1724	25.8743	20.9398	54.5095	18.7807	27.8644	7.60266	18.5336	17.9576	25.2377	16.7961	25.8896	33.1429	26.239	28.7161	29.0872	17.1049	17.03	22.3167
96.12386462_414.7300667__[M-2H+K]- 59.1804_154	34.1683	18.3797	77.0349	8.86055	17.621	21.094	19.4586	14.4378	20.1596	12.0002	7.60304	13.1082	25.3227	81.8361	104.545	63.9061	60.9615	62.7242	61.5884	60.6029	71.0111	34.8947	54.0783	41.1524	78.8879	112.639	56.7793	103.96	106.897	85.3213	28.4363	106.352	102.939	85.7637	36.7778	73.4377
96.31675505_414.2765304__[M+Cl]- 61.3452_154	19.5244	27.5765	46.3884	30.9753	44.0547	56.2648	31.1365	25.2699	24.1944	40.7851	45.6038	13.0917	55.4444	118.603	105.052	72.8632	92.0206	69.6284	53.7615	47.8594	86.7789	30.1906	35.9887	35.9429	83.8133	127.576	66.5316	96.9261	120.667	114.837	48.0814	84.5742	88.5247	101.719	70.9777	78.0855
96.31467435_475.1302411___461	29.3797	27.6407	27.5483	22.1869	58.0587	35.2469	11.6978	29.3751	16.4022	16.0159	22.84	8.73578	35.994	75.0354	52.7629	38.9651	72.0242	22.6722	7.96131	13.9599	20.6603	19.3912	2.53709	10.1369	6.17786	20.9505	18.9536	36.5714	21.6686	13.8095	3.1572	17.2518	23.58	17.1328	23.842	19.1286
96.53289931_414.4351096___8580	9.76222	27.5765	38.3163	22.1252	44.0547	42.1986	42.8126	28.8799	32.2593	32.0008	22.8019	39.2752	108.552	100.482	45.993	111.504	72.1613	85.1709	34.2354	74.5633	33.4636	100.246	80.3583	83.3586	72.7915	47.6591	119.99	103.162	110.492	138.492	86.4242	90.8047	42.0894	118.708	87.3975	64.092
96.62494659_124.1387113___7314	0.044486	0.0417716	0.0352303	4.40288	0.0400679	0.0319682	0.0353867	3.58703	0.0365954	3.99724	0.034555	0.0396846	0.0232039	0.0238966	0.0209605	0.0221872	0.0198348	4.52366	101.697	0.0213417	0.0189364	0.0210019	2.5388	0.0232341	0.0283566	0.0274813	0.0290008	0.0257658	0.0249155	0.0253439	0.0290452	2.88813	2.96446	0.0314148	0.0313307	3.20633
96.65345094_414.6716762__[M-H]- 97.6636_154	48.7513	27.5359	58.062	8.86055	35.2	42.1377	19.435	36.054	28.1897	16.0194	51.4883	17.4776	60.544	94.8109	52.7389	117.404	94.842	65.394	76.4157	66.1645	56.3469	69.4925	82.8032	20.5762	186.706	121.978	57.9004	165.295	76.285	100.516	152.478	134.125	168.169	88.186	166.978	148.003
96.69909169_124.369566___7315	4.86243	4.55965	0.0352303	0.0402612	4.37731	3.49245	0.0353867	0.0328174	4.00199	0.0365366	0.034555	0.0396846	0.0232039	2.61306	0.0209605	2.42614	0.0198348	2.25557	0.0182778	121.119	0.0189364	0.0210019	5.0776	0.0232341	0.0283566	0.0274813	3.16097	2.81888	0.0249155	0.0253439	0.0290452	0.0264366	2.96446	0.0314148	3.42799	0.0293344
96.77459781_414.5590027___8581	24.3756	45.8931	42.5788	39.8725	79.7812	83.834	58.3051	46.8702	84.5692	68.0825	34.1615	43.6941	114.064	87.0826	115.292	87.4086	72.0678	89.1338	73.1986	63.7941	73.7716	82.4724	55.466	77.7433	111.112	131.862	163.09	119.902	155.471	114.779	175.97	125.264	197.112	163.042	132.178	85.9107
96.89880904_414.5085024___8582	14.6254	9.17862	30.3002	39.8253	70.4001	66.8144	38.9206	50.4756	28.1897	4.00009	30.4025	21.8196	48.8157	64.4826	53.1841	90.7418	70.2621	41.313	79.3921	67.5927	49.9901	58.0154	64.4333	59.049	126.729	90.4451	74.8533	61.0119	61.5161	129.08	35.1882	145.871	87.6457	121.51	112.614	99.4673
96.95980364_132.1729281___6796	4505.27	5048.73	3479.7	2324.05	4253.04	1949.33	1990.13	2201.56	1923.46	1407.3	2672.55	1972.43	9657.47	12224.2	6538.6	5593.34	4233.59	1830.68	1004.16	3750.28	5197.51	7094.52	8676.08	7783.38	6311.82	6573.6	5714.23	3116.83	3025.53	6117.33	2866.86	3108.98	2792.19	5998.43	5065.53	4767.32
96.96200656_779.4507268___34	1519.62	2003	1482.97	1621.98	2006.64	1756.23	1504.95	1284.89	1414.98	1426.67	1573.1	1271.31	920.725	1922.73	1854.29	1191.16	1770.05	1046.77	1591.23	997.641	877.943	864.129	992.764	937.16	4926.58	3925.34	5109.55	4715.84	4858.02	4114.81	4978.2	5042.3	4997.8	4670.39	5232.48	6550.17
96.96180929_1199.50383___9620	0.044486	99.7572	0.0352303	4.26702	89.3798	127.673	11.734	0.0328174	0.0365954	0.0365366	137.549	0.0396846	136.885	507.92	445.155	135.836	265.067	83.6268	167.654	122.46	128.673	141.452	120.444	58.5895	0.0283566	116.717	280.244	0.0257658	181.794	128.766	0.0290452	0.0264366	165.187	0.0314148	0.0313307	270.926
97.04220008_1121.204464___5083	975.843	883.369	833.283	739.282	1009.7	726.382	821.714	631.382	695.225	875.973	862.671	765.101	99.6856	102.667	55.227	69.609	63.4199	114.923	44.3291	81.614	80.768	84.7836	135.79	63.6833	464.18	405.949	383.707	334.649	312.435	422.254	361.597	418.783	410.976	393.918	429.757	345.977
97.02956267_331.8148463___44	107.234	110.155	65.6241	53.2255	61.5777	91.2898	73.8295	111.965	76.8141	96.2016	51.8132	72.839	58.187	59.8943	56.9602	29.324	53.92	31.6948	53.625	46.3362	57.7016	45.8238	76.1294	63.3331	120.456	165.299	142.271	153.502	114.162	242.173	79.4788	126.736	135.72	119.891	116.094	111.72
97.06729936_433.5309734__[M-H-C2H4]- 126.102_46	83.8408	106.8	43.0671	58.3761	146.36	116.877	110.105	72.8314	81.399	81.0669	182.86	110.526	107.088	206.822	191.545	119.676	180.682	77.8205	188.256	72.0993	98.1041	116.931	107.007	110.369	358.43	382.773	143.662	216.501	234.829	379.373	238.413	234.169	257.992	326.386	238.607	268.99
97.06719769_357.9357899__[M-H-C2H4]- 126.106_17	48.7865	277.89	54.1005	70.8938	52.8519	73.8101	46.6688	10.8417	48.2818	60.2894	83.4877	52.4262	38.0346	70.3927	60.6157	416.932	60.4842	40.7394	59.6711	55.9076	43.3396	57.3274	40.6373	75.7279	673.902	732.252	93.1491	406.815	84.1621	494.924	128.163	77.9338	88.6976	704.868	209.639	91.7796
97.07511124_124.0171345___7316	0.044486	0.0417716	3.8616	8.80576	21.9592	6.9849	0.0353867	7.1969	4.01345	4.00922	7.57515	8.67964	132.992	2.62076	353.95	124.637	0.0198348	232.413	0.0182778	117.617	212.267	0.0210019	129.115	0.0232341	34.2089	36.0423	15.8427	14.0944	0.0249155	13.882	25.3614	8.6644	5.9453	13.7735	10.284	32.0633
97.20891605_125.3582404___7317	4.85104	0.0417716	0.0352303	0.0402612	4.3587	3.4761	3.85415	0.0328174	3.98437	0.0365366	3.76034	8.64142	0.0232039	7.82053	129.912	0.0221872	0.0198348	0.0207037	0.0182778	0.0213417	0.0189364	113.995	128.918	136.935	15.4357	2.99057	9.46437	0.0257658	2.71154	8.27093	6.31381	14.3731	0.0271353	3.41862	0.0313307	3.19245
97.22975292_413.3422485___8583	34.1171	32.1252	23.1942	26.5829	96.805	98.6825	50.5352	57.6972	133.28	60.0014	53.1369	34.9553	105.1	86.0104	79.2467	117.446	129.188	95.5821	106.106	129.536	111.662	109.432	136.33	97.1468	109.496	106.026	115.788	116.112	113.969	116.742	106.464	84.4139	116.279	97.8445	104.588	109.599
97.24511584_444.5860376___2831	24.4127	9.20891	23.2147	0.0402612	13.2192	10.5801	47.0877	194.853	113.166	353.514	345.299	284.323	5.07956	28.6487	9.13891	7.27381	6.48746	15.8537	5.98095	11.6768	6.19932	6.88604	7.62323	10.1433	0.0283566	12.0071	18.9791	11.2358	10.8621	16.6081	0.0290452	11.5271	17.7117	20.5669	20.5329	25.6018
97.45620793_413.7085656__[M-H]- 98.4606_154	24.3694	82.3062	50.3157	8.86097	96.805	38.6356	54.4226	68.5154	60.4861	32.0394	45.5459	21.8471	82.6517	40.3386	79.4752	107.995	80.4839	107.617	32.98	129.649	139.933	128.811	156.381	108.612	82.7067	45.561	61.5308	91.365	106.961	82.0281	114.037	82.7221	79.7261	112.086	56.6189	143.182
97.47709143_125.6957703___8932	9.70208	18.2062	3.84174	0.0402612	8.73446	0.0319682	3.86207	3.57862	19.9622	15.9503	15.0712	220.786	2.52677	10.4274	0.0209605	7.2611	0.0198348	4.50248	207.841	121.413	0.0189364	116.745	7.58344	0.0232341	9.28087	8.9717	9.46437	2.80629	2.71154	16.5742	6.31381	17.2477	2.95763	13.7027	17.0619	6.3849
97.47163261_444.629501___2832	4.88253	23.0223	15.4765	8.89581	4.4064	0.0319682	35.5225	134.402	114.802	318.337	467.91	191.226	7.6092	13.0057	6.84503	19.3968	19.4366	4.52346	11.9456	16.3475	6.19128	11.4767	10.1507	15.1913	13.0391	26.98	12.6528	14.0447	13.5602	16.5858	9.49502	17.2907	8.85587	10.2835	6.84432	3.19514
97.48468195_413.8286962___8584	34.1259	36.7145	42.1887	13.2608	22	31.6033	31.096	36.054	20.1355	23.9743	26.5701	4.35887	30.7001	84.3228	29.8857	78.3656	90.7516	28.7826	81.5597	33.0321	44.1357	32.4578	37.5293	28.9873	40.5681	89.9625	57.3897	28.7165	66.0063	79.6114	95.8528	71.9017	58.5462	27.7285	48.399	67.4127
97.53453482_126.1729213___8072	0.044486	0.0417716	11.5015	4.38318	4.3587	3.4761	7.7083	3.65893	0.0365954	3.97939	0.034555	4.32071	133.667	130.07	116.237	0.0221872	0.0198348	8.99012	0.0182778	0.0213417	0.0189364	4.56733	0.0232272	267.96	15.4357	11.9419	6.299	8.41887	10.8462	13.7849	9.45539	5.74923	14.7529	17.0931	13.6255	12.748
97.69620127_413.5625008__[M-H-CH2]- 112.715_154	24.3422	36.6648	61.8512	30.9753	65.9281	52.6849	31.0986	79.2405	24.1352	36.0009	18.9775	13.0772	35.9042	89.3381	51.4531	65.5367	78.6909	43.3748	66.5453	34.0861	99.4394	55.29	93.2976	41.0776	74.0195	100.393	51.0243	28.8394	50.171	81.5829	76.4976	59.8513	90.5435	76.4903	37.5135	83.0784
97.70616207_127.7841707___8073	4.92811	9.27023	0.0352303	17.8555	0.0400679	3.54063	3.92266	3.6368	4.05752	0.0365366	7.66077	0.0396846	0.0232039	10.3682	0.0209605	2.40753	115.785	116.558	0.0182778	0.0213417	108.363	231.201	5.03267	133.678	3.07875	23.8397	12.5708	13.9732	8.11237	2.74913	6.29118	5.7274	5.88485	3.4109	27.2107	9.54317
97.70414146_445.8040511___2753	19.5038	18.4178	19.3212	8.88389	13.2192	49.305	31.1782	96.1025	80.9477	169.537	281.918	133.012	10.1591	13.0057	22.8168	2.42123	15.1374	9.04693	5.97281	4.664	14.4463	13.7563	10.1507	7.59567	18.8157	6.00353	3.20448	8.53612	13.5776	19.3761	19.237	11.6773	14.9512	20.8345	10.398	12.9674
97.93340217_981.8622442___21	356.532	471.207	261.503	246.955	462.754	228.343	216.578	246.578	258.236	335.206	209.552	256.719	678.516	628.725	539.28	472.02	550.942	557.551	420.475	448.816	422.281	547.44	510.876	519.566	363.8	243.105	334.27	236.389	281.909	186.597	242.765	261.704	325.692	330.875	331.633	301.881
97.93366545_1052.336147___3314	460.038	441.742	338.992	344.543	531.99	239.213	396.017	416.841	361.082	466.423	429.45	351.477	2181.73	1347.82	2063.94	995.917	2206.66	995	1074.2	1020.74	939.419	303.014	1194.27	1039.92	454.95	343.934	409.139	390.033	295.724	316.303	424.711	417.538	399.704	498.519	493.329	497.491
97.93346769_1090.445389__[3M-2H]2- 65.9633_24	531.177	521.765	471.487	409.797	526.417	392.015	420.27	481.456	422.333	517.492	534.643	483.375	1549.06	2837.09	1499.25	1448.61	1614.05	839.447	890.269	1118.64	1880.92	1214.75	2027.48	1981.79	559.733	501.207	660.23	525.292	360.552	362.508	538.162	542.795	573.885	441.237	603.895	703.621
97.9335483_136.4297159___6812	43.7423	82.2083	53.8614	30.8521	87.5391	34.9557	85.1233	47.3193	23.9911	75.9168	52.9115	60.8019	451.883	325.45	0.0209605	412.261	0.0198348	99.2626	0.0182778	0.0213417	277.283	252.512	306.454	0.0232341	27.9399	36.1039	22.2237	25.4111	21.8161	27.7236	12.7173	26.0546	26.7464	20.6537	34.3793	9.63924
98.03285081_1122.990977___5080	348.89	341.243	234.275	313.76	336.088	173.976	240.934	231.517	240.078	520.454	282.927	285.66	50.6239	70.4801	86.4911	77.5069	84.3795	76.4362	51.8163	53.5455	53.8243	87.2544	65.7456	60.4165	150.517	113.811	194.621	185.617	144.399	199.458	197.254	217.699	121.582	150.55	184.547	170.456
98.15628945_414.3289466__[M+Cl]- 63.1839_154	24.3756	32.1252	46.0069	17.7001	52.8001	42.0917	23.322	54.081	28.1897	15.9828	18.9786	13.0917	41.0262	68.617	65.7582	64.2115	48.2978	20.5806	36.2442	25.9538	52.1498	28.4365	23.1356	17.9372	44.09	54.4735	44.719	80.5072	85.2051	61.5433	57.5807	75.0193	83.9646	27.7754	88.3849	71.0037
98.14244548_437.8553886___9	9.75926	50.5273	34.787	54.5306	116.68	104.347	23.3132	57.6357	44.2697	28.0414	18.9738	48.0283	22.8191	18.4297	16.1745	4.91401	8.64233	4.58198	0.0182778	7.09702	8.37821	18.6077	0.0232272	5.12866	15.4326	26.9592	15.795	5.61358	18.9897	19.3481	9.48009	14.3795	5.8959	20.5507	6.83971	15.9754
98.37785715_414.7346865___8585	39.001	55.0717	30.9256	35.4003	17.6	21.0689	27.209	28.8432	32.2168	4.00485	15.1829	17.4557	66.6146	104.258	60.5698	83.2987	68.2603	64.2766	50.5602	58.6071	54.5431	84.2439	116.322	78.2898	115.823	117.281	38.2342	102.385	71.788	89.2825	85.8321	67.952	124.925	137.495	156.12	89.229
98.37451408_436.9959472__[M-H-CH4]- 115.407_9	19.4941	36.7025	42.4652	48.7629	17.5854	107.741	46.626	32.3797	28.1355	20.0078	22.7666	26.1654	7.59687	10.3864	6.83871	4.90485	6.47217	4.5186	2.01137	21.2516	8.36287	11.6084	7.7018	7.58605	12.3327	17.9516	15.7755	8.40923	8.1283	24.8459	9.4687	14.3623	17.6655	3.42071	10.2468	19.1472
98.4305912_490.0388712__[M-H-CO2]- 143.418_60	175.439	167.956	296.917	8.87185	22.0329	56.1101	15.5708	10.8642	24.252	4.00297	7.57924	0.0396846	12.8398	13.02	16.2133	14.7153	10.8112	2.28961	16.1258	2.35889	14.6446	6.95876	10.2627	15.3879	9.25899	5.99352	0.0290008	5.61099	8.14167	16.6022	15.7492	5.74125	14.7236	6.84409	10.2152	6.38435
98.49488565_414.8675596__[M-H+NH3]- 82.4778_154	29.2508	36.7145	15.4832	26.5816	35.2	21.0689	15.548	14.4216	12.0813	12.0002	7.59144	30.5859	83.2355	81.397	94.1206	105.074	50.8234	62.2038	81.0546	115.603	98.0166	80.4269	75.3734	70.7489	85.87	93.2321	140.002	59.4945	96.0839	66.2723	104.309	120.14	115.355	105.776	61.9282	59.6168
98.57958538_125.0661286___7318	4.85104	0.0417716	0.0352303	0.0402612	0.0400679	3.48306	7.72415	7.15724	3.99244	3.98758	11.3034	4.32947	131.145	138.259	0.0209605	0.0221872	0.0198348	4.52136	101.697	118.79	103.781	116.745	0.0232272	0.0232341	9.28087	0.0274813	6.33653	0.0257658	0.0249155	2.76237	3.1699	5.76029	0.0271353	6.85135	0.0313307	0.0293344
98.60831851_414.5012843__[M-H-C2H4]- 127.644_154	14.6254	27.5359	38.657	17.7001	35.2	14.0459	54.418	28.8432	16.1084	36.0009	7.59144	4.36392	128.21	141.332	59.7101	95.7722	63.4091	64.0087	72.9032	86.9912	116.601	91.5331	80.0874	86.6952	99.6034	118.225	99.6991	141.425	111.876	73.45	60.8033	64.5371	68.7144	125.979	126.866	90.6085
98.60209288_436.9079523___1205	34.0675	9.16546	23.138	30.9942	70.2051	38.555	34.893	35.9376	48.1802	19.9859	11.3593	21.78	5.12582	20.9923	20.7305	9.79322	4.36698	6.85089	2.00819	4.71446	2.08724	6.9533	10.2498	7.66693	15.596	24.2253	15.9625	19.8585	10.9531	11.176	19.1663	11.6286	2.97987	13.8485	6.9118	16.1486
98.61488452_123.1116121___7292	0.044486	4.55823	0.0352303	0.0402612	656.928	3.4844	15.4858	0.0328174	3.99245	0.0365366	0.034555	4.32914	0.0232039	0.0238966	230.638	0.0221872	0.0198348	111.829	0.0182778	0.0213417	0.0189364	0.0210019	130.978	0.0232341	3.10102	8.98952	6.31948	2.81206	0.0249155	0.0253439	0.0290452	2.88148	2.96446	0.0314148	0.0313307	3.19856
98.66357413_490.3113775___60	176.115	210.551	216.006	17.7437	39.6593	38.5757	15.5708	7.24283	4.042	12.0089	0.034555	8.70665	10.2718	0.0238966	6.94857	2.45256	8.64893	4.57922	8.06288	0.0213417	2.09209	0.0210019	2.56567	5.12929	3.08633	2.99676	9.47268	0.0257658	2.71389	0.0253439	3.14984	11.4825	2.94473	0.0314148	10.2152	3.19217
98.72517287_414.7280709__[M-H]- 99.7329_154	9.75026	13.7679	15.4832	0.0402612	30.8	14.0459	15.548	14.4216	12.0813	12.0146	11.3872	13.1082	87.5833	79.3046	61.3696	90.4003	65.0442	77.6193	34.5181	105.327	60.6876	80.6925	59.2286	96.7815	75.576	69.522	34.491	51.5651	46.842	57.6292	52.7032	76.6433	77.1823	76.727	60.8022	130.656
98.8473444_414.4127968___8586	19.4738	18.3324	11.5971	4.42504	21.976	45.5993	34.9441	14.4074	40.2254	35.9614	15.1652	8.72783	55.8646	66.0163	85.7541	83.5343	77.5873	43.5291	54.512	71.9083	64.3349	57.91	86.3831	64.9269	59.9124	132.247	31.1245	71.2175	77.0812	74.4248	54.5809	86.6204	128.44	76.3177	76.9404	104.942
98.89695126_489.3295578___60	173.967	125.255	165.922	17.7437	44.0659	24.519	3.89269	7.24283	8.084	0.0365366	3.78962	8.70665	12.8398	18.4658	13.8971	14.7153	15.332	11.4481	10.0786	23.5889	8.36835	4.63917	10.2627	7.69394	6.17266	9.10501	9.47268	14.0275	8.24769	8.40919	18.899	14.3531	5.88946	6.84409	13.6203	12.9278
98.94370871_1091.336816___24	3816.47	4711.28	1636.83	2461.78	2192.44	1534.19	3763.81	2611.77	3126.34	1808.19	1985.79	3239.9	9602.44	11458.7	9586.42	9998.96	8391.49	8115.91	8462.43	8237.12	7821.77	7445.88	9719.98	8856.43	2942.23	2387.25	2716.39	2596.55	2003.21	2498.47	3861.92	2602.66	2104.83	2468.81	2219.26	4047.26
98.94384374_1021.239212___131	871.542	1049.83	716.236	642.253	1052.66	871.709	908.391	875.715	826.233	732.233	974.199	881.624	1324.42	932.237	1031.54	365.636	1069.95	1655.38	1211.54	681.597	1088.14	957.674	2172.76	1334.02	1300.29	1056.2	1526.42	964.28	815.6	859.131	1276.9	1365.86	1191.75	1366.54	1604.14	1362.05
98.95454085_786.9690243___6916	209.902	368.639	269.085	272.078	214.343	218.084	220.497	253.993	172.001	279.078	377.452	213.74	567.645	767.226	723.396	717.244	648.512	549.604	518.185	535.119	449.126	522.669	438.239	477.252	399.208	147.047	356.941	395.138	448.043	476.628	445.588	387.269	443.463	297.879	443.878	529.164
99.01200144_330.9814594___44	10402.8	12098.6	11423.1	7949.12	11345.5	9987.32	7274.09	6827.79	6437.39	3390.15	2714.8	3038.57	464.403	507.309	401.537	364.215	352.303	354.015	342.518	305.769	347.443	355.205	279.886	267.741	967.959	525.944	367.173	514.014	482.153	664.781	357.902	641.373	667.181	363.815	981.013	894.738
99.04710066_523.404616___7022	208.923	257.217	235.476	177.212	179.806	223.479	158.534	158.756	192.632	484.996	386.473	381.194	988.491	1104.2	1272.48	601.386	676.646	648.5	185.045	188.935	182.562	140.762	205.832	144.171	190.317	299.502	212.117	86.9542	67.6321	163.035	81.9328	106.314	94.2159	417.52	308.726	355.603
99.04667778_387.1275974___82	207.01	269.859	225.138	487.665	754.245	538.953	703.848	671.244	717.367	626.609	730.768	499.328	389.418	258.909	363.884	184.554	217.248	191.517	121.692	153.669	109.606	123.109	155.42	167.444	461.949	535.067	479.57	452.544	493.168	924.097	247.584	689.65	636.795	1542.8	1212.3	1566.34
99.04692899_455.3509265__[M-H]- 100.056_25	529.589	698.246	535.515	454.131	677.556	579.886	618.578	620.863	642.301	654.152	815.103	769.849	197.055	187.813	207.286	143.882	162.696	140.551	123.114	89.2355	125.05	147.165	232.947	175.012	611.064	952.346	778.669	312.962	213.749	445.682	510.335	672.726	196.421	2472.87	1603.07	438.54
99.04696582_286.5163939__[M-H-C5H8O4]- 232.102 [M-H-C6H10O4]- 246.104_32	1346.63	1908.55	1454.15	5262.35	8157.13	6579.5	7511.21	7267.51	8133.92	6156.47	5961.75	5607.42	53.0451	83.3547	112.798	67.6013	117.756	89.4889	50.2095	132.578	64.5689	77.5111	87.149	109.974	111.809	153.428	142.469	242.063	198.266	376.435	177.712	218.203	154.976	543.314	317.645	398.56
99.04623189_262.9139177___4771	619.333	333.721	297.868	1634.91	2163.4	1899.05	2048.08	2015.58	2062.87	1236.87	1518.31	1363.27	246.695	344.724	315.04	152.935	186.78	206.574	84.612	96.1821	100.794	99.452	115.014	119.949	297.088	349.479	280.996	167.584	158.206	263.282	139.454	194.44	142.376	372.601	235.162	314.712
99.04668923_484.4401524___6515	158.075	173.212	154.14	150.979	211.9	168.553	297.819	308.536	315.953	573.414	595.688	507.12	297.426	323.589	378.443	122.069	165.974	113.063	89.9869	93.0347	96.2209	96.023	104.804	112.452	136.216	221.106	186.331	165.516	140.929	280.29	820.276	972.253	873.887	5255.79	3771.7	4421.93
99.03120422_1203.58962___9633	0.044486	0.0417716	0.0352303	0.0402612	0.0400679	0.0319682	0.0353867	0.0328174	0.0365954	0.0365366	0.034555	0.0396846	0.0232039	0.0238966	0.0209605	0.0221872	0.0198348	11.4198	8.08202	7.11615	10.0468	0.0210019	7.40017	0.0232341	0.0283566	0.0274813	0.0290008	0.0257658	0.0249155	0.0253439	0.0290452	0.0264366	0.0271353	0.0314148	0.0313307	0.0293344
99.04864233_417.6406284___853	113.503	136.468	49.4159	257.13	306.907	294.453	386.281	266.012	313.006	373.594	425.421	280.023	237.746	120.198	138.169	122.168	279.381	250.53	82.2249	174.677	97.5419	150.89	203.885	252.463	653.273	469.036	640.062	421.174	143.859	289.89	456.091	863.394	437.253	994.654	665.951	740.216
99.04307911_127.9131283___8074	38.6624	41.716	30.1857	66.9581	366.548	109.76	218.471	94.8113	115.524	119.171	93.874	92.3861	0.0232039	333.457	0.0209605	237.615	357.082	618.4	630.121	233.486	252.646	288.151	31.0139	0.0232341	40.0237	98.4269	53.4635	92.7794	67.6031	226.104	128.5	143.28	108.985	130.195	74.8813	117.798
99.07374428_415.4378283___6	29.28	22.9747	23.2249	13.2903	67.0056	35.1148	42.7552	36.0969	20.1581	47.9896	51.4823	43.6925	62.2842	365.178	262.841	252.008	163.362	312.382	288.667	278.693	205.069	239.815	321.046	285.793	426.156	139.57	443.68	557.41	183.619	194.387	452.456	247.849	645.881	465.052	433.034	344.148
99.1998115_327.7520536___5958	39.0424	68.9453	77.3183	57.6472	44.0366	85.9787	27.2262	39.7727	36.2275	16.0602	3.79797	13.1129	5.06492	15.8726	9.25616	9.84532	6.57464	4.53412	0.0182778	7.09299	6.27954	6.98268	15.4607	7.71537	9.27741	17.9865	6.33086	11.2467	11.008	8.29836	15.8543	5.76797	14.7739	17.1465	17.0958	19.1739
99.2831813_374.8575512___1117	19.609	0.0417716	7.7632	17.8141	8.85439	10.5992	11.7143	10.8885	12.147	4.03158	3.81042	0.0396846	32.9976	47.0207	72.4541	7.29912	6.50181	4.54698	0.0182778	4.67964	2.07243	4.60544	5.09695	0.0232341	0.0283566	24.0831	15.9004	16.9517	0.0249155	19.4509	12.7145	11.5762	20.7783	17.2185	6.87222	9.63826
99.30668961_415.1878078___154	19.5247	27.5696	27.0612	4.43027	61.6734	58.2425	46.7007	21.6567	32.7934	60.0011	41.8167	30.5859	197.936	253.831	213.378	198.729	49.0386	129.247	286.567	195.555	191.771	184.939	178.32	138.009	318.649	270.533	345.34	353.414	220.904	241.63	343.279	315.975	463.38	432.389	601.863	415.032
99.4564758_327.5542565___5947	43.7454	36.7256	34.7499	26.6064	48.4403	42.1997	58.3419	21.6682	44.2212	16.037	18.9899	13.0968	12.8189	5.29086	6.94212	7.38399	13.1493	6.89802	6.05395	4.72866	6.27954	6.98268	2.57678	15.4307	3.09247	9.12186	3.16543	5.62336	11.008	11.2026	12.8424	14.4199	5.98364	17.1465	10.2575	19.4526
99.54244361_415.2473054__[3M-2H+Na]- 26.1912_154	34.1683	22.9747	46.3907	26.5504	48.4577	97.2526	93.8759	50.5324	24.1915	40.0007	30.4122	34.9113	158.849	221.104	207.06	113.096	145.35	109.362	192.079	90.6172	179.581	140.258	169.381	107.247	365.345	203.223	287.589	153.01	140.485	168.139	177.566	279.295	239.617	337.05	261.355	262.418
99.68991067_757.1208474___2217	9.82273	13.6949	7.74495	0.0402612	17.5823	0.0319682	11.6368	0.0328174	8.09204	20.0195	7.53581	8.71714	2.56305	15.9932	9.33795	17.2306	15.4682	6.88923	8.12625	7.07174	4.19254	4.65796	10.2731	12.9182	12.3496	23.7197	18.7931	13.8282	21.7676	13.905	25.1032	17.2771	20.6632	27.0458	20.2726	25.493
99.77144285_414.9510464___8587	43.8762	13.7679	46.4496	35.4422	35.2	74.089	38.87	61.2918	16.1084	20.0004	22.7743	17.4776	78.4911	143.562	125.601	126.085	108.31	108.79	100.761	63.0973	72.8005	74.5282	145.745	86.6014	170.587	137.997	96.7737	99.2345	82.5838	98.6348	120.841	129.099	169.333	198.794	205.054	134.35
99.89308219_332.297017___3713	58.5635	41.4195	34.8336	26.6125	52.8447	31.6424	54.4674	21.7265	36.2845	16.0527	7.5949	21.858	15.2976	15.6437	20.5294	14.5549	12.9554	9.06639	9.94192	4.66112	14.1997	11.4697	7.6219	12.6774	12.3697	23.9825	9.49637	5.62348	5.42966	57.0057	19.0203	8.6521	17.7254	37.7282	34.1898	22.3721
99.92768357_981.3789521__[M-H-H20]- 118.941 [M-H-C6H10O4]- 246.998_21	5569.71	7803.94	5964.07	6075.87	8591.78	5777.97	5249.31	5644.74	5691.81	5706.99	5538.58	4850.59	12391.6	11628	10188.1	11574.3	10915.2	9669	10162.2	10220.9	8809.73	9661.29	10775.4	10691	6129.7	5027.83	6130.21	5621.57	5236.63	4045.12	6323.21	6222.66	5749.22	6870.82	6908.92	7584.63
99.92771721_1052.137319___3284	10064.2	12594	9221.23	8907.24	11644.8	8566.75	11684.8	9429.1	9279.17	10657.3	9269.5	9489.81	23346	27995.7	39406.9	20412.3	22122.1	19524.8	40551.4	22836.7	17875.9	18431	44231.9	24591.1	14592.5	6760.24	10787.1	14703.9	11351.2	166.091	10196.1	9663.02	9332.57	18034.1	21376.1	16360.2
99.92784804_1090.721303__[M+Cl]- 64.9578_24	5977.88	7110.91	4903.11	5000.85	7047.14	4958	5844.08	4889.65	5115.28	6222.34	6286.64	5673.31	20835.9	52743.5	18889.5	22170.1	18623.2	16633.5	18494.7	21434.5	16596.7	32698.1	20281.2	43034.3	6424.9	5149.87	7985.21	6759.3	4891.41	4501.45	7419.07	7472.87	6414.68	8167.87	8205.56	7300.26
99.9205754_150.2888479___6727	118.641	206.291	158.441	101.872	243.103	137.666	72.019	126.202	76.134	122.501	180.679	130.841	3558.25	1028.85	342.136	297.085	320.217	228.463	479.533	2151.31	2480.38	1294.4	4138.25	4318.3	35.9605	21.1857	44.813	28.3914	19.2117	42.163	57.7965	20.3958	20.9318	62.2978	89.9414	74.3596
100.0037324_414.5552241___154	63.2898	100.828	54.1198	79.6507	138.122	119.979	124.246	104.453	88.4958	68.0016	117.53	78.5505	107.871	154.536	53.1841	113.33	61.2382	61.5542	61.956	35.8876	114.265	46.4471	69.3777	62.893	164.576	108.806	119.866	107.234	123.313	137.556	92.5598	106.617	133.221	104.947	110.3	119.579
100.0011309_501.5084634___606	58.3144	123.991	92.499	274.042	340.584	389.326	93.1513	91.3751	52.3385	59.8549	37.8153	43.4203	25.6457	39.5248	41.6279	29.3659	58.2625	38.8552	26.1342	33.0029	22.9703	43.9461	25.5977	35.8282	49.3493	48.5258	25.2286	30.8064	43.9214	39.2294	31.4516	20.0845	29.4087	27.3223	34.0093	54.2413
100.0477679_331.3150995___44	634.805	699.187	691.371	408.665	654.659	620.506	488.293	366.257	410.408	216.207	163.465	217.87	20.2631	22.0082	41.0113	21.805	49.6624	29.4658	23.8333	18.6441	24.7293	34.3678	33.0282	32.9612	37.109	56.9586	50.5853	28.1172	29.8631	107.899	22.1895	63.4482	47.267	77.6089	85.4718	60.7244
100.0443127_307.7668367___1646	43.9246	50.5268	92.7176	141.868	249.391	193.964	186.625	184.366	229.274	542.685	663.786	533.815	32.9253	62.7377	54.8789	24.2954	36.815	20.4196	33.9175	37.3559	33.051	68.9759	119.612	110.835	30.9015	59.8289	25.3073	14.0556	37.9376	27.605	47.5289	51.8659	38.4092	200.554	120.203	98.6503
100.0515375_523.3916728___7036	14.576	18.3963	19.3037	8.823	21.9369	13.9866	30.9762	14.4225	12.0566	19.9328	60.4468	17.3421	82.1394	76.5367	55.906	21.7581	58.8414	43.4757	19.889	23.2622	0.0189364	18.2793	12.6328	15.1759	9.26595	17.9691	6.32759	8.41492	5.41748	13.7994	9.45379	17.2401	23.554	44.4406	34.0344	15.9828
100.0499916_283.6450154___5824	77.9776	110.433	134.836	396.609	474.349	443.72	554.685	381.497	424.109	196.641	261.076	281.3	40.9415	23.7555	27.3043	24.2101	24.0175	9.15899	7.94045	4.64809	14.4131	9.17222	15.4047	12.6376	15.8171	18.3266	6.48624	28.8033	24.6568	14.0695	22.7788	11.826	30.3203	42.0666	14.0299	16.3132
100.2332795_414.2554948___8588	34.1172	22.9465	27.0281	26.5225	48.4025	52.6849	50.5352	64.9094	40.2741	48.0011	34.1594	39.2316	108.415	113.71	63.4116	108.43	53.4275	33.3801	69.6587	84.4561	56.2967	46.6862	110.45	79.7143	31.2565	75.7811	38.2682	81.3126	46.9423	75.9601	86.6248	78.0001	60.8147	85.7749	58.3258	40.8676
100.2287697_123.4928528___7319	0.044486	0.0417716	0.0352303	0.0402612	223.356	0.0319682	3.87144	0.0328174	0.0365954	0.0365366	0.034555	4.33946	0.0232039	0.0238966	0.0209605	0.0221872	0.0198348	115.079	0.0182778	0.0213417	0.0189364	121.323	0.0232272	129.656	3.10102	3.00353	0.0290008	2.81888	0.0249155	0.0253439	0.0290452	0.0264366	0.0271353	6.86745	3.42799	0.0293344
100.2332412_501.5112267___607	43.7902	18.3916	50.0973	207.309	262.967	141.785	34.9716	32.559	40.303	19.9741	11.3575	13.0413	12.6645	15.6174	9.13385	4.83374	2.15765	11.2862	7.94123	9.29495	8.24942	6.85254	2.52778	12.6366	15.4404	11.9818	0.0290008	11.2161	5.41517	19.369	9.44676	8.61831	8.83385	6.84031	6.80187	3.18668
100.346044_413.8206663___8589	19.4955	27.5358	11.5971	53.1658	79.2041	45.6602	73.8592	36.0608	40.2741	28.0007	15.182	4.36941	74.3731	66.6436	39.5832	41.9007	68.1813	34.3651	89.4042	66.3233	76.5327	67.3909	58.5819	35.9428	28.1308	36.3749	50.5834	31.3585	52.0532	33.6235	44.7927	64.2613	36.5615	34.7831	34.5696	32.3261
100.4659699_413.0346285___8590	24.664	69.6723	23.193	61.9559	62.3508	90.5145	33.8654	79.9048	40.3851	24.3267	30.7283	4.36412	87.415	68.6453	62.3236	81.0691	65.6652	78.583	34.2394	63.8388	44.8115	39.6577	75.4779	41.009	24.9638	79.109	118.111	62.4933	49.0328	30.7101	51.1063	42.6312	86.8285	114.496	75.452	68.6832
100.4703976_502.2593292___599	14.5967	45.979	46.3058	132.875	231.899	198.255	34.9716	43.4119	28.2121	19.9741	34.0725	8.6942	12.6645	15.6174	18.2677	12.0844	21.6032	18.0579	9.92654	9.29495	14.4365	11.4209	20.2223	7.58195	15.4404	20.9682	25.2604	8.40176	8.13313	13.835	9.44676	14.3639	8.83385	10.2458	20.4056	6.37336
100.6710288_125.0968675___7320	0.044486	0.0417716	3.84174	0.0402612	4.36723	3.48306	3.86207	0.0328174	0.0365954	0.0365366	0.034555	0.0396846	7.58032	5.21369	230.638	129.431	0.0198348	2.25124	0.0182778	0.0213417	0.0189364	118.802	126.642	129.153	0.0283566	0.0274813	3.15479	2.81206	2.71694	2.76237	0.0290452	5.76029	0.0271353	0.0314148	6.83934	0.0293344
100.6977322_413.3683325___8591	19.4955	41.3038	46.3339	53.0449	92.4048	80.7835	54.4226	82.9397	52.293	40.0009	34.1594	26.1544	82.0668	58.0939	69.5857	39.1942	58.9402	34.3092	44.2253	50.3752	45.9238	39.4157	53.8956	43.5619	68.6508	84.8748	68.6072	59.8204	44.0053	81.103	47.1258	72.134	35.7904	65.8559	63.0047	42.0239
100.7041147_502.205267___608	14.5967	13.7937	23.1218	88.7583	101.596	76.5162	27.2001	21.706	12.0909	7.98962	15.1433	8.68198	15.1974	12.9984	29.6496	9.66748	6.47295	6.77173	11.8983	6.97122	8.24942	4.56836	2.52778	12.6366	12.3523	11.9668	6.3151	2.80404	5.41517	5.52715	3.14892	20.1094	2.94462	10.2605	13.6237	19.1201
100.9353073_1090.522646__[M+Cl]- 65.9633_24	56325.1	66572.5	50413.9	51553.3	62172.8	47217.8	56134.7	53224	53630.2	53916.5	34219.3	53223.4	75045.5	88369.8	73053.5	74438.6	65250.7	62278.8	63617.9	72855.9	59827.1	59881	73974.3	70638.8	59420.2	36330.9	47502	58095	30829.2	41524.9	59523.5	42117.3	40738.6	44246.3	73372.2	70082.4
100.9354173_981.7613189__[M-2H+Na]- 79.9637_21	5298.96	14221.2	10726.1	10578.1	15161.9	11202.5	9322.68	11885.4	9752.56	10289.7	9687.97	9574.74	18631.3	19322.5	17214.9	18490.2	17500.6	16943	16934.4	17106.9	13797.4	15706.7	17940.8	17641.1	12778.4	10207.3	12743.9	11800.5	9888.39	8539.34	9539.75	13168.7	11276.1	12867.6	14687.4	12892.6
100.9351658_1018.906353___7728	6496.03	11178.2	9750.19	7473.31	11613.7	10170.6	10133.3	9717.63	8513.11	8468.86	10315.5	5403.2	13350.6	23500.1	22628	22288.7	19233.2	10747.3	19368	17953.8	13598.6	18293.1	21643.4	14318.8	10411.3	12265.9	8264.87	4981.12	5287.36	6472.6	6921.94	6833.81	5066.9	12047.6	7830.35	5798.68
101.0255004_307.3936006__[3M-2H]2- 68.0313 [M-2H+Na]- 80.0406_15	2446.75	2240.31	1926.37	1420.78	1947.3	1672.71	1836.92	1579.39	1527.33	1875.54	1680.66	1542.98	980.708	1361.64	1345.07	821.937	849.651	775.189	609.54	761.432	781.283	808.688	926.195	852.517	1454.9	1739.6	1734.69	597.216	572.925	813.149	704.52	755.953	599.931	1150.86	868.42	893.843
101.0261315_373.9482388___6364	505.825	491.51	429.333	620.43	713.861	659.131	804.139	571.052	608.545	1210.23	1256.34	1185.54	599.931	523.219	775.565	584.254	990.78	713.216	730.58	845.214	847.883	871.636	834.212	1086.32	1447.37	1717.84	1394.5	815.789	692.774	1198.07	792.511	910.687	854.396	1580.19	1000.41	1296.96
101.0233587_132.5341986___6832	278.254	312.022	363.23	537.73	1057.48	652.323	433.146	426.853	803.232	1417.72	1365.26	1107.74	0.0232039	457.221	0.0209605	1001.88	544.284	0.0207037	1150.24	1243.31	1601.13	1982.82	2193.91	0.0232341	754.707	789.613	1214.78	798.401	515.154	1572.1	973.314	1734.83	927.529	2636.59	1379.18	1473.89
101.0261526_258.1951248___63	2827.59	3274.67	3071.5	1915.42	2321.85	1993.41	1318.15	1202.06	1316.34	1084.36	1042.31	947.359	668.445	813.243	830.112	418.806	492.544	431.203	374.994	389.149	444.066	496.438	501.722	496.12	763.583	1005.88	869.528	453.231	460.797	584.393	339.162	444.284	383.975	689.14	496.071	581.784
101.0259972_452.1295252___2655	388.696	501.647	511.286	490.037	607.056	556.465	639.434	530.355	397.871	907.213	891.314	772.21	237.941	277.946	248.71	264.14	322.326	248.405	349.885	321.618	278.414	508.63	714.246	679.959	557.947	586.765	484.409	401.458	349.186	538.43	503.362	593.934	510.821	1217.09	929.109	1132.37
101.0259673_334.597962__[M-H]- 102.033_44	1051.53	1162.03	945.75	856.521	1418.91	988.073	776.677	816.764	982.784	964.252	896.585	753.228	618.781	722.438	719.415	484.32	534.861	429.458	394.535	450.202	457.322	485.943	634.009	594.36	616.846	702.562	673.609	509.238	480.133	644.734	479.13	697.734	610.368	854.825	745.473	982.897
101.0265049_523.2223659___7020	291.829	349.221	325.825	171.841	284.347	283.965	246.919	226.578	229.113	282.486	309.355	281.428	417.392	456.779	521.545	237.69	512.048	373.773	179.149	172.126	199.819	191.733	219.544	282.245	339.602	439.83	392.537	238.564	241.125	278.782	253.141	299.402	295.911	339.47	270.042	336.439
101.0256563_492.2053776__[M-H-COCH2]- 144.052_48	521.854	607.941	527.572	334.419	411.729	319.115	337.643	255.46	304.282	540.021	521.045	555.523	339.42	433.174	422.798	258.856	346.221	261.103	250.848	244.501	223.569	217.945	296.087	293.035	908.258	1378.69	1109.34	314.246	355.25	485.969	398.979	363.933	402.937	945.799	655.662	842.467
101.0260277_564.6838786___2934	263.9	288.532	225.52	515.835	588.873	510.708	425.262	327.412	432.519	756.012	915.764	713.036	81.4599	123.043	126.052	227.619	203.786	154.342	273.551	252.581	240.177	212.234	321.801	327.972	204.353	240.591	238.472	387.393	334.076	425.186	313.023	468.477	389.988	399.44	613.604	361.677
101.0264332_300.0248113__[M-H]- 102.034_38	1994.83	3159.4	2247.13	1205.47	2020.7	1756.2	2131.09	1927.93	1641.73	1801.37	1933.03	1571.06	1137.9	1334.4	1248.71	809.566	849.299	775.093	682.059	771.668	859.257	759.12	972.634	828.569	2337.79	1869.67	1498.67	658.676	455.855	863.41	705.617	849.484	645.027	1577.53	880.431	895.063
101.095357_1090.147857___24	97.8103	145.408	146.748	88.5693	106.308	123.683	178.325	83.4202	88.1377	106.07	159.881	128.48	444.997	461.459	246.246	360.437	320.611	293.299	306.425	375.695	229.726	270.615	382.814	371.388	223.595	150.986	234.043	215.285	135.216	102.093	209.595	193.169	179.841	176.417	278.572	365.524
101.2748674_1088.74009___24	44.1867	145.828	76.7547	67.8834	108.958	38.4733	96.3075	72.0293	47.6514	82.2333	67.9706	56.3099	163.487	204.177	198.547	119.853	127.692	107.568	215.719	72.2396	97.2831	138.768	185.741	155.851	55.8679	54.2085	97.3924	77.7369	102.944	44.3683	64.3409	81.4121	92.0531	107.989	65.7961	95.8247
101.375603_1091.410286___24	73.7831	123.565	69.8832	53.3847	91.6767	126.038	85.8512	97.5626	132.787	140.936	91.814	91.3608	216.227	273.553	291.648	247.201	205.094	197.007	197.959	228.607	188.079	182.323	336.597	224.67	94.6508	146.043	144.573	150.763	98.9181	124.896	133.129	99.4145	122.587	161.872	126.865	122.926
101.4277595_1089.569054__[M+Cl]- 66.4629_24	116.895	137.174	103.706	79.3148	133.747	94.531	92.7683	71.4694	91.671	91.7354	87.1505	95.6241	360.754	318.468	359.39	246.817	248.357	192.077	239.507	257.854	197.515	160.319	245.334	163.752	139.86	108.964	108.176	127.973	117.314	103.052	118.296	87.2051	126.828	144.566	143.955	135.768
101.5162059_128.534249___8075	4.92811	4.63512	3.90203	4.46388	8.87672	3.54063	7.84532	7.27359	12.1726	0.0365366	3.83039	4.39934	0.0232039	0.0238966	0.0209605	4.81505	0.0198348	117.615	0.0182778	116.461	0.0189364	9.106	131.99	5.03692	9.23625	0.0274813	3.14491	0.0257658	2.70412	2.74913	6.29118	0.0264366	8.82728	6.8218	3.40369	6.36747
101.5507036_1084.24697___6459	184.606	228.042	217.977	158.237	213.824	147.345	138.408	206.453	206.772	167.104	195.085	244.24	409.004	413.745	344.386	336.957	311.05	277.353	312.174	303.64	329.969	293.999	331.324	394.888	223.389	199.706	246.68	158.172	168.105	147.02	276.506	262.013	182.096	248.9	306.269	257.103
101.604382_1085.901885___8906	87.8372	122.85	80.8903	66.353	83.3581	77.173	69.8615	123.193	118.577	92.024	76.077	74.1076	233.057	305.77	347.996	264.427	220.456	214.031	343.619	278.822	153.662	231.678	130.668	296.596	149.655	127.921	114.134	130.997	95.7377	112.146	170.162	115.88	116.101	99.2759	158.668	180.517
101.6719168_1088.662611___24	113.004	118.884	120.214	142.359	109.379	76.9559	70.1646	106.478	123.517	96.6421	95.7627	134.606	324.436	502.312	194.616	261.591	208.425	122.226	217.977	260.937	195.311	211.331	462.227	216.049	134.134	112.713	147.006	153.991	131.739	116.974	187.068	149.833	135.149	119.261	192.033	113.127
101.7705795_1088.741871___24	101.543	140.864	68.6652	74.3798	161.372	76.4717	147.512	110.012	71.2359	114.828	119.836	90.7131	191.377	357.991	219.228	276.016	173.661	204.961	168.322	267.693	197.161	212.953	202.272	262.129	104.974	115.482	143.226	119.378	146.825	132.433	143.827	190.153	185.825	92.6837	105.666	113.046
101.8062772_1084.320131___6453	107.356	118.251	73.188	66.2164	108.49	108.744	155.08	118.035	132.972	119.87	102.596	116.765	229.781	297.392	167.23	243.167	229.907	194.955	164.367	318.721	179.334	204.888	217.133	224.398	116.414	114.031	111.867	89.7366	85.7697	91.4209	109.454	189.277	161.726	177.245	154.703	97.2359
101.9354743_1090.111309___24	7524.9	5370.95	6738.84	3768.04	8396.33	6582.69	4379.22	4131.02	3694.05	7585.78	8240.15	7082	9898.06	12483.9	9391.37	9691.73	8989.72	8557.3	8584.21	11467.8	7443.84	8115.55	9729.18	9488.13	7462.93	3650.05	7752.21	6821.4	6245.51	3450.77	8180.56	8363.74	4705.69	5667.2	11164.6	5268.24
101.9353108_981.7418236___21	1360.86	1992.71	1416.55	1310.4	2171.8	1699.2	962.972	1435.01	1400.21	1402.28	1530.56	1204.49	2677.6	2723.33	2424.58	2617.86	2711.45	2323.6	2288.68	2471.79	1243.42	2160.22	2567.81	2508.06	1865.25	1506.14	1689.27	1602.54	1426.37	1216.79	1676.08	1804.39	1487.9	1456.01	1874.2	1730.73
101.9454344_124.9427267___7290	96.6561	114.124	103.337	62.6526	91.3791	52.0556	68.864	87.5181	48.8342	71.5028	81.7475	83.8107	0.0232039	750.71	1813.46	204.875	0.0198348	425.206	0.0182778	125.519	845.223	1808.34	348.911	379.863	43.1452	29.8548	62.8983	25.2121	16.2404	11.0087	31.4737	34.4363	14.7286	30.7274	57.9084	28.683
101.9538795_1126.984448___210	494.703	297.391	374.937	422.32	349.237	253.119	413.195	350.246	277.976	344.313	322.237	412.558	260.476	233.837	161.826	147.493	150.056	159.859	121.065	232.353	113.546	254.045	112.36	203.609	62.3813	102.176	57.1289	50.6858	57.2671	43.0362	129.769	44.708	47.4167	65.0559	155.205	66.6218
101.9423087_1190.682226___184	0.044486	879.441	736.311	0.0402612	715.051	655.905	713.801	0.0328174	657.317	696.673	694.565	628.16	2.4641	739.237	309.023	623.815	576.117	11.0159	542.892	613.139	416.447	487.152	682.878	641.336	0.0283566	240.065	467.59	0.0257658	253.548	270.409	0.0290452	0.0264366	349.118	0.0314148	0.0313307	265.055
102.0280918_258.0311029___4749	103.324	170.998	159.37	159.346	115.119	91.9845	105.632	148.986	76.5499	72.7423	87.8487	101.167	40.1231	64.7651	67.8706	45.7499	30.0275	40.4827	31.5763	39.306	49.1605	36.486	35.3428	42.7735	74.4587	75.2418	57.362	48.0906	32.722	52.6054	25.584	55.1625	59.6021	55.0619	51.6501	64.2696
102.0578169_602.5081268___105	97.2197	173.785	92.3952	122.862	108.251	167.436	163.657	105.033	119.741	71.5194	152.284	52.0689	22.8936	74.198	84.5658	55.9823	43.4953	18.1186	73.0516	28.0865	24.8957	20.6293	22.8458	17.7779	97.7996	134.192	144.034	143.196	125.15	99.7001	155.258	124.253	116.761	121.342	135.733	194.432
102.0970349_1086.394337___8897	58.6956	93.1022	60.8763	35.4283	81.531	78.6422	69.942	47.8308	60.5161	68.1448	41.9404	61.1671	197.083	247.847	145.044	207.6	190.992	169.759	193.21	211.771	201.954	120.545	225.178	146.391	78.0982	91.2536	128.801	79.7569	95.0228	89.5909	77.1034	116.889	87.7062	92.4581	72.464	84.4712
102.1797191_1087.588448___163	102.284	160.036	73.0444	92.6142	100.628	88.4057	131.422	82.2604	95.7398	139.719	114.126	117.356	170.128	274.289	182.08	165.716	176.246	189.846	196.086	193.986	184.549	121.08	189.134	192.12	146.483	136.323	133.767	107.613	93.419	111.607	166.381	133.196	124.239	117.623	146.836	142.587
102.2957315_1086.166188___8907	121.996	98.8439	100.05	90.3129	105.192	94.6188	69.7032	42.9588	89.1607	87.9208	102.494	108.868	137.751	151.597	131.73	187.097	136.442	140.328	171.703	123.775	105.928	89.4962	119.047	162.073	97.782	91.7259	120.663	96.6299	85.261	92.0812	99.4955	69.6425	89.8984	86.6554	134.578	100.394
102.3317329_414.5504298___8592	9.75026	22.9466	27.0599	22.1252	26.4	49.1607	27.209	18.027	20.1355	16.0003	37.9572	13.0917	35.8979	94.6693	81.0686	39.4631	45.9883	39.0178	48.3256	33.0321	35.6208	30.1906	23.1764	44.3139	119.596	103.357	104.969	132.32	76.5556	72.374	95.247	117.241	90.2099	117.313	128.654	125.744
102.3343856_503.6394963__[3M+Cl]- 22.4575_3	38.8171	27.5099	38.4367	8.81595	30.6748	34.9186	15.4873	7.21023	20.0813	7.96513	7.54618	0.0396846	7.57612	7.78815	18.2235	9.64352	6.45474	6.75417	3.96145	9.26182	4.11473	4.55701	15.1255	7.56618	15.4015	14.9389	12.6026	8.39215	10.8028	13.8012	9.42321	8.60094	0.0271353	3.40997	10.1913	9.53969
102.3661136_1090.243663___24	88.0293	40.8959	69.5123	57.5701	86.9466	59.0918	54.3984	82.6261	88.1377	76.1473	129.509	103.675	100.376	117.873	102.86	92.7013	103.13	144.25	107.711	114.436	85.1862	55.3833	134.024	93.9944	103.034	51.6949	70.2664	78.8462	71.7293	88.3283	99.5103	128.087	95.8521	109.511	75.886	138.187
102.4586324_1089.803726___24	164.403	159.04	139.908	100.706	152.157	97.3792	119.099	106.789	102.976	158.534	139.345	146.869	140.482	196.425	130.136	127.965	113.95	133.138	141.475	180.251	120.664	124.915	153.97	151.653	137.468	80.5039	132.793	146.076	113.272	130.385	110.824	119.184	88.0399	147.607	126.21	139.847
102.5583397_503.6233476__[3M-2H+K]- 21.8729_3	19.3528	27.4326	11.5102	30.7814	26.2265	31.3436	19.3099	7.19168	8.01365	7.94465	7.52718	0.0396846	5.0409	15.546	6.82063	14.5935	6.44277	2.2469	11.8611	7.01567	4.10722	11.4956	15.2634	7.55143	15.3576	17.8909	15.7076	8.36763	16.1745	2.75455	6.26449	8.57391	5.85659	13.6003	3.38676	15.8701
102.5665319_414.4944922___8593	9.75026	18.3572	11.5971	39.8253	26.4	21.0689	15.548	18.027	12.0813	20.0243	15.1829	21.8196	51.385	39.6814	38.0637	29.4452	48.2023	41.313	32.2171	37.751	35.5551	39.48	38.5593	28.2923	152.684	106.25	84.4006	83.4779	65.2962	97.4566	83.0643	92.1453	162.279	194.48	82.9551	90.2442
102.7822666_374.2094662___6402	9.84259	9.29016	3.89643	13.4106	8.89108	14.1862	0.0353867	14.6064	12.1985	8.09353	7.65192	13.2289	83.4032	64.0864	95.5588	9.76962	13.0738	4.56567	6.00999	2.34897	4.16045	9.2456	7.67393	0.0232341	9.35244	15.1113	12.7745	5.67259	8.2218	11.1581	12.7633	5.80872	8.94282	3.45683	10.3484	6.45078
102.7973749_415.3508803___854	24.4059	9.18987	19.3295	39.8725	44.0524	52.735	46.7007	14.4378	40.3192	24.0291	30.4122	13.1082	274.098	481.701	277.933	383.751	261.817	269.713	342.367	291.575	246.914	332.749	329.509	361.229	234.278	216.443	316.398	186.811	200.468	165.885	320.655	267.157	386.829	330.429	294.119	368.69
102.9353217_1088.387597__[M-H-C4H8]- 160.003_24	710.579	908.518	759.272	723.094	951.671	725.169	848.746	788.349	719.756	828.228	770.031	720.039	2038.87	3419.27	1588.07	2374.37	2395.88	2187.92	2243.5	2551.21	1450.55	2055.21	2424.55	2555.7	1172.4	882.522	1326.37	722.119	866.468	810.593	1414.13	1251.12	1115.45	1045.71	1363.24	1179.4
102.9443629_127.7446319___142	499.305	510.775	433.52	272.758	311.364	250.403	236.396	183.387	262.239	315.776	239.01	266.985	3759.57	2565.16	1281.79	4016.4	114.035	1684.46	1062.77	0.0213417	1858.01	2513.41	2717.77	3752.84	267.752	150.603	271.303	218.929	147.613	105.73	217.112	167.195	181.862	274.57	312.984	177.101
102.9365182_1127.824432___9510	281.425	1280.87	1453.09	1751.98	1709.81	1460.09	297.654	184.348	1650.21	1538.13	1815.5	210.699	1365.71	729.547	1204.83	420.658	1333.44	942.33	1217.59	1097.97	967.515	1233.18	1539.84	1418.55	1401.4	1335.2	1568.69	1422.47	1223.6	1100.78	1366.35	1358.47	1447.8	1748.36	1482.02	1508.45
102.9503381_1192.153829___9443	725.167	1061.4	708.398	787.103	962.761	709.228	871.442	814.855	793.996	698.772	891.872	799.819	898.685	276.464	370.213	217.309	577.956	785.63	332.092	712.014	310.041	18.4977	395.419	866.421	0.0283566	329.199	414.492	367.664	179.367	226.779	360.933	307.255	375.984	0.0314148	0.0313307	268.469
103.0166084_632.0208305__[M-H]- 104.027_19	340.986	1230.24	729.475	510.649	1832.08	1817.3	1400.56	844.706	534.3	1018.38	1950.18	460.84	1832.42	1588.42	1145.06	1450.85	1198.2	1297.88	996.936	1111.21	1297.71	1021.08	1332.96	1045.3	249.799	565.703	306.467	764.322	760.748	969.785	577.855	532.76	649.42	320.598	305.596	271.165
103.0166751_476.8838321___2	344.591	1814.43	812.449	423.883	2579.56	2424.05	1886.56	531.431	248.16	1020.06	1501.61	244.338	773.291	915.854	873.759	1136.47	775.707	892.078	565.477	597.673	673.317	688.277	715.167	805.383	149.941	163.818	86.1377	162.831	228.246	311.476	175.59	176.157	138.112	184.101	152.106	105.654
103.0166638_670.1315445___5	180.213	865.439	403.844	459.942	1624.48	1723.9	947.768	671.181	495.56	293.218	583.179	223.184	592.175	505.228	347.667	1282.35	1100.66	1031.71	625.062	714.185	759.899	614.65	740.803	656.865	256.641	428.415	229.663	403.402	383.545	737.225	246.696	294.295	239.925	154.941	99.6657	84.536
103.0053787_308.8252287__[M+Cl]- 68.0313 [M-H]- 104.014_15	396.332	629.478	526.641	115.423	205.711	198.742	136.082	106.789	94.8386	108.621	148.411	70.1044	387.458	341.949	362.38	107.048	136.656	180.99	83.7951	103.699	119.62	77.1184	58.5518	91.1741	452.173	403.921	383.28	112.588	94.9734	126.745	101.542	75.0184	62.0276	99.3567	85.4507	63.8376
103.005272_271.2119521___3468	479.002	717.188	525.324	137.613	145.338	190.753	202.819	148.793	100.143	142.656	116.911	100.514	387.06	424.015	387.548	109.051	192.738	104.552	55.7673	65.1694	72.1792	41.3195	48.3153	102.131	530.66	566.272	546.266	79.8169	65.9818	141.893	96.5434	81.8749	68.9648	92.8037	55.458	87.4789
103.0170558_554.7329299___7802	116.831	434.411	223.851	114.033	512.953	446.539	406.192	135.888	123.713	286.681	549.054	108.22	534.593	423.136	343.674	624.307	345.027	609.983	383.373	484.869	598.984	711.599	756.26	318.795	67.9531	90.7657	90.6067	106.79	116.713	142.316	126.299	120.707	124.902	144.812	190.668	82.9673
103.0168781_412.0783744__[M-2H+Na]- 82.0422 [M-H]- 104.025_154	200.815	1154.31	438.793	272.636	3257.8	2630.12	2413.4	740.404	331.553	1583.27	2812.87	470.067	740.025	1148.95	990.882	1177.95	1005.29	996.126	905.291	760.616	980.679	1155.92	1204.38	1116.89	299.835	369.451	313.766	343.221	375.289	160.963	382.294	445.231	331.639	477.723	491.516	417.425
103.0284761_1094.516906___24	3429.35	2803.33	2407.54	4338.97	2111.17	1689.48	2048.42	2652.14	2894.6	2771.12	1504.94	3457.12	498.5	621.899	488.293	432.506	719.042	483.192	529.924	310.961	447.145	543.613	440.325	492.926	1501.26	1402.88	1331	915.283	1152.28	1156.42	1117.75	1063.86	1252.76	1213.4	1246.21	1317.95
103.0607098_136.5041156___6802	72.9038	50.3025	50.017	0.0402612	21.8874	17.4813	46.4396	24.8147	19.9926	28.0057	49.1321	30.4415	7.58023	161.737	0.0209605	120.384	115.259	42.9102	400.805	232.921	318.954	231.735	5.06725	10.1304	172.678	238.593	72.3628	11.2981	51.83	42.1628	118.392	68.2227	99.101	34.4707	27.5164	9.64389
103.17265_740.2190479___4681	14.5028	0.0417716	11.6372	8.78874	13.1786	13.9691	11.6357	10.8562	20.2518	12.0202	3.76484	21.7957	7.69361	13.5576	2.37977	17.4865	8.84971	7.00466	12.1821	2.39102	18.9014	11.6512	10.303	15.5153	12.1544	8.8835	12.3447	43.3197	21.7001	27.6747	24.7879	69.1558	15.0468	103.011	71.2185	70.2353
103.2018097_125.5173356___8933	0.044486	4.55154	0.0352303	0.0402612	218.976	0.0319682	3.86207	3.57862	0.0365954	3.98758	3.7678	0.0396846	0.0232039	2.60684	0.0209605	0.0221872	0.0198348	230.157	0.0182778	0.0213417	109.672	4.57824	5.05563	0.0232341	3.09362	2.99651	6.30958	0.0257658	0.0249155	2.76237	0.0290452	2.88014	2.95763	0.0314148	0.0313307	0.0293344
103.2728678_414.9416193___8594	9.76236	13.7848	15.4636	35.4005	44.0524	38.6723	7.78345	25.2662	24.1915	32.0006	38.0152	26.1835	150.202	298.145	162.724	209.224	259.916	161.025	206.1	200.505	189.006	270.377	329.554	153.238	159.647	136.159	157.717	71.2855	90.278	80.2523	183.616	80.9868	188.275	179.187	121.995	140.891
103.4069552_124.369566___7321	4.85104	4.55965	7.68348	0.0402612	4.36723	0.0319682	3.86207	10.7611	0.0365954	7.97515	0.034555	0.0396846	0.0232039	137.636	0.0209605	9.68147	0.0198348	6.76671	99.7028	123.448	109.031	233.49	2.53285	0.0232341	0.0283566	2.99651	0.0290008	0.0257658	0.0249155	8.28712	0.0290452	0.0264366	0.0271353	3.42567	0.0313307	0.0293344
103.4156735_741.0997389___4682	0.044486	9.1327	7.74655	0.0402612	4.3984	20.9285	11.6357	25.3328	16.1986	24.0121	11.2808	13.0581	10.2582	5.35332	7.12318	9.9923	8.83562	18.4192	8.10887	0.0213417	6.29186	20.9453	12.8589	15.4954	3.03859	23.6893	12.3385	38.6313	21.732	55.9091	27.6913	86.9068	60.3442	89.0065	57.299	120.9
103.5054696_414.8335983___8595	19.5005	27.5359	30.9256	22.1252	26.4	38.6262	31.096	14.4216	20.1355	24.0004	18.9786	30.5474	105.205	134.166	82.0924	95.0245	53.4828	62.3978	65.4641	83.8448	123.812	100.91	108.832	109.806	95.5721	91.4197	119.314	64.6624	74.0893	22.3794	74.2083	81.521	68.9709	77.3873	60.0464	117.769
103.6557789_734.6028667___4079	0.044486	23.0752	15.6877	4.44925	8.89086	3.52463	23.5219	10.9736	8.18898	16.1767	15.2243	8.81178	15.3502	10.6622	14.0186	22.0842	8.80987	13.7734	10.1115	11.7469	8.37002	2.32084	12.832	12.8796	18.452	29.6489	21.8331	22.3415	18.9635	43.1856	12.5347	25.8734	44.0963	42.3079	19.7614	74.6809
103.7550074_415.4621915___855	9.74803	9.17863	11.5977	30.9754	43.9961	52.6723	42.7552	32.4438	36.241	19.9739	34.1705	13.0917	55.6328	113.991	67.515	88.5961	89.2141	68.2551	84.6892	278.251	253.088	282.209	472.283	630.491	30.8336	75.2028	18.8999	108.877	60.5615	67.3234	347.825	736.222	384.232	596.161	488.984	447.35
103.8894261_1074.319688___41	251.648	231.435	155.235	132.062	116.005	122.415	90.834	67.8214	103.527	127.446	85.4268	56.5036	553.783	521.478	398.159	120.357	127.648	79.6779	71.5799	95.153	50.5187	63.4709	74.4199	70.0718	255.593	236.172	234.219	93.6504	63.8633	62.5874	64.1737	78.9098	98.5911	98.0371	68.7041	75.5652
103.9238349_133.4357511___6815	58.3231	73.2351	42.3197	48.5471	52.5235	38.4513	46.4309	25.4796	31.9881	55.9387	49.1321	34.744	186.952	499.607	269.965	549.853	77.6855	145.528	0.0182778	134.817	244.127	167.331	144.426	98.9193	21.731	27.0779	9.54577	14.1173	21.8161	13.8618	47.7927	17.3697	26.7464	34.4229	17.2146	22.4916
104.0023444_416.236912___856	24.4	18.3797	31.0096	17.7427	60.7651	28.1265	62.2807	46.926	20.1581	24.0293	49.4208	21.8756	25.3187	36.4896	79.7831	60.5092	77.6584	24.8792	188.534	247.904	277.396	304.595	485.795	565.923	30.88	29.7051	22.0765	87.4565	67.456	128.453	526.053	668.035	349.995	523.753	479.698	587.571
104.0264424_1094.437673___24	3242.4	3812.38	5071.99	4421.16	3144.95	3970.43	4412.97	2340.9	3635.63	3355.17	4142.45	3491.55	136.399	136.871	168.74	126.576	85.5339	143.643	76.7092	106.074	80.5702	104.261	166.973	117.54	885.667	1523.6	811.82	1288.33	1316.79	2239.35	1348.89	900.244	1085.27	1745.01	1375.16	1406.34
104.1365565_1074.271601___3556	137.812	163.941	128.887	66.0312	74.3787	114.934	27.0406	54.802	39.8676	83.6366	56.8111	65.1964	789.452	502.48	463.021	107.818	134.885	59.5094	81.4329	85.4725	68.882	27.9162	20.3434	40.5611	179.873	216.055	119.733	53.9199	72.4126	87.6398	44.9216	46.3061	41.7895	119.721	61.8336	68.9943
104.1229803_758.5194964___2218	0.044486	13.9193	7.8708	0.0402612	17.866	7.1067	23.6567	7.36056	12.3348	16.2769	7.6466	17.6857	7.69934	8.00297	16.3306	4.92874	17.6761	9.18126	8.12399	7.0812	6.28714	13.9707	12.8602	12.8978	24.3882	32.6885	12.3568	11.2266	5.45275	19.4762	22.0098	19.8912	20.7129	108.598	13.306	55.0315
104.2070866_443.9111173___5416	34.5638	37.2364	23.5247	27.0335	35.6473	82.0516	43.4168	83.2504	48.8856	32.5695	19.2661	44.3023	2.53332	12.9876	15.9529	12.092	4.31401	4.51802	1.98845	0.0213417	4.12246	11.4609	5.06795	7.58677	0.0283566	11.9736	9.47655	5.60371	8.12623	2.76089	3.15701	11.4945	5.88854	0.0314148	6.82826	6.3825
104.2253112_416.3632929___857	14.64	13.7848	34.8858	8.87134	22.0251	70.3164	23.3552	3.60969	24.1897	24.067	22.8096	8.75025	40.5712	68.6483	29.7291	36.6843	32.4485	11.3242	29.826	160.815	244.726	195.663	262.77	286.757	21.6436	114.299	47.3067	91.0121	66.067	69.0888	308.283	320.883	208.347	290.256	251.797	368.533
104.3618353_758.3668189___2219	9.80922	0.0417716	3.92053	4.46205	8.90046	10.6184	7.85286	32.9933	8.19171	0.0365366	7.63254	4.41332	15.3553	18.6246	9.31028	7.37288	6.61076	9.1714	6.07753	2.35414	10.4532	6.96843	17.955	25.7666	12.329	9.01676	6.25574	16.8063	16.5449	13.8919	0.0290452	31.5533	8.84517	110.981	6.7316	45.1175
104.3736176_1074.139918___41	63.274	242.716	133.96	44.0857	83.1291	63.4976	81.1219	42.8346	71.7617	83.7373	90.8978	82.5822	319.062	295.568	187.767	79.0236	98.5746	24.8532	82.2838	34.017	52.6382	34.4787	49.6711	17.7455	202.588	233.489	86.4614	56.7578	68.4274	55.8111	57.8443	60.7768	59.6993	110.831	65.2689	77.8452
104.4351126_443.7534709___5417	24.7345	41.9685	47.0484	36.0433	40.1764	39.2421	35.5229	47.4762	40.8123	8.12726	15.4129	22.1499	5.07254	10.3878	2.27892	12.092	4.31915	0.0207037	1.98831	0.0213417	8.24532	2.2894	17.7302	5.05894	6.17521	20.9802	6.31002	8.40557	5.41798	8.29279	6.31402	8.62088	5.88854	10.2556	3.41413	6.3904
104.4729951_415.9781627___858	14.6221	27.5359	19.3541	13.2903	26.3976	14.0459	15.5474	10.8146	20.1581	3.99913	26.5771	4.36925	17.7013	44.255	36.4958	24.2331	21.5774	22.5912	47.4846	107.559	83.6207	59.8741	137.824	127.973	33.1151	128.852	25.1998	50.5197	45.9003	77.3057	115.303	136.066	151.204	224.041	97.8781	125.966
104.6020191_1074.621107___41	121.681	94.5391	130.371	88.0416	96.2548	87.7185	100.316	83.0492	114.967	99.5673	141.101	86.9286	146.497	148.973	104.273	53.458	78.3032	45.1876	51.42	69.4502	55.4136	32.1401	40.6868	53.2365	124.761	119.622	175.655	56.7578	55.702	62.196	80.1044	75.4189	89.4326	96.9771	96.0663	75.5652
104.6132993_758.5053979___2220	4.86517	9.15376	15.525	13.1438	8.81351	24.5418	15.5596	18.1424	24.3157	32.1426	15.1277	39.3485	15.4131	10.6564	23.3451	24.6305	17.6509	16.1176	8.12779	9.45072	10.4893	28.0062	23.1966	28.4191	15.2974	17.9628	12.4294	25.1383	30.2078	27.987	28.1931	49.6977	53.0238	62.659	77.1639	142.165
104.6759389_444.8140485___2833	19.7507	37.2364	39.1386	53.9669	35.6473	42.7345	19.6983	40.0995	46.5811	24.3408	11.5363	30.9542	17.7332	23.3434	4.55308	12.0779	8.62803	9.02605	5.95827	4.65263	10.295	0.0210019	5.06113	5.05222	0.0283566	17.9604	18.9301	8.40557	5.41167	11.0436	3.15701	11.4945	2.94427	17.0926	6.82826	3.19125
104.6961733_415.1079229___8596	9.76236	27.5359	23.2249	22.1506	13.2157	17.5783	27.2421	28.8757	20.1339	20.0243	22.8091	0.0396846	27.855	39.0962	45.6745	9.69325	23.4329	11.3097	19.884	39.625	20.6557	55.0819	57.1953	62.0663	33.5983	65.8822	37.7998	28.0665	48.8919	58.8324	53.6434	114.143	63.9477	93.8723	69.1955	70.3306
104.8410834_782.2813117___8827	9.70533	13.8604	7.72602	8.79741	8.89796	10.4766	19.3915	36.1472	20.1773	16.0244	15.0744	8.7086	7.76429	7.92028	4.64009	19.5413	2.19252	6.88724	8.18161	4.70939	10.5832	27.8962	69.4684	84.2284	15.28	24.3748	3.11105	19.2414	16.7601	8.50507	53.9127	56.947	32.005	125.38	110.402	141.723
104.9313652_1124.288753___5084	624.698	547.742	508.37	630.471	571.325	453.44	515.393	519.248	722.065	630.266	559.62	660.817	454.592	518.158	459.879	455.886	414.514	427.405	426.296	443.157	399.33	411.448	409.815	514.831	612.669	443.679	467.451	452.775	367.081	347.997	460.548	501.967	445.173	623.517	484.258	450.68
105.0213625_668.3638687___769	34.0337	64.681	19.3128	166.826	138.834	117.332	71.4078	103.946	154.836	36.1401	60.5847	17.4164	30.6563	10.588	23.177	44.1183	39.4118	41.2204	45.907	23.5333	31.2863	11.5732	23.0215	17.9648	30.85	33.3202	31.6423	73.016	46.0093	140.138	35.1748	72.6985	35.6633	27.5304	13.6751	19.3713
105.0464045_1095.305834__[M-H]- 106.054_24	16437.6	16198.1	12946.5	19616.8	14492.4	16077.6	12749.3	7921.01	14459.6	13587.9	11353.8	12919	143.076	238.742	275.32	282.57	181.175	307.583	199.42	192.838	255.608	282.714	472.051	210.666	5548.56	7048.97	5564.49	4849.84	7038.46	5453.51	4337.38	3948.12	5258.89	5688.93	6627.55	5390.22
105.0915146_123.9252782___7322	0.044486	0.0417716	0.0352303	0.0402612	0.0400679	3.49245	0.0353867	0.0328174	0.0365954	0.0365366	0.034555	0.0396846	0.0232039	0.0238966	0.0209605	2.42614	0.0198348	0.0207037	0.0182778	0.0213417	0.0189364	231.201	0.0232272	133.034	0.0283566	0.0274813	0.0290008	0.0257658	0.0249155	0.0253439	3.17017	0.0264366	0.0271353	0.0314148	0.0313307	0.0293344
105.0918732_782.0918598___8828	9.71787	0.0417716	7.74657	13.23	0.0400679	3.49641	15.5132	32.5758	16.1419	12.0183	15.1135	17.4642	12.7966	10.586	16.2861	9.79536	13.1706	9.19652	6.06775	9.43159	18.8404	41.9013	15.4186	33.4719	9.19281	15.0393	12.4628	13.8195	5.52611	22.769	6.20806	25.6931	26.2465	63.2236	36.0466	64.2783
105.1671102_337.4292213___4870	4.88577	22.9891	11.6146	0.0402612	13.2317	7.04091	7.78937	7.24078	8.06819	12.054	15.2086	0.0396846	540.874	402.761	555.797	132.611	156.774	114.639	5.97805	9.33236	9.42141	13.7795	17.8251	5.07559	18.8713	33.5289	0.0290008	5.71617	2.75467	14.066	6.44541	0.0264366	12.0155	10.4582	3.47453	12.9938
105.2126712_1094.230725___24	112.943	106.887	102.138	88.9049	101.502	42.3559	109.258	84.4912	112.613	60.3754	118.586	127.213	17.721	18.1954	15.9542	29.0682	17.3192	17.9986	17.9602	18.6423	24.8622	9.15223	22.7945	17.6805	72.0419	111.72	64.2153	68.5759	49.3216	55.5241	35.4578	37.939	57.0972	59.1434	48.4413	45.0772
105.3942433_414.8074009___154	14.6254	9.17862	15.4636	13.2752	13.2	10.5344	46.644	18.027	40.2711	20.0004	18.9786	0.0396846	33.3338	102.464	75.774	41.4389	31.2299	22.9053	32.2164	34.3602	42.0476	47.6698	74.3933	17.967	33.917	36.3857	38.2598	31.522	35.7534	61.5433	51.1828	37.776	68.2901	30.8218	27.6566	28.7572
105.4049621_337.4267466___4871	14.6573	13.7935	0.0352303	8.88446	8.82113	14.0818	15.5787	10.8612	4.0341	4.018	19.0108	4.37711	425.505	310.06	522.253	102.254	100.671	78.9619	1.99268	4.66618	8.26451	13.7795	0.0232272	15.2268	9.43564	18.2885	3.21751	8.57425	2.75467	19.9866	6.44541	5.86315	9.01164	13.9443	6.94905	9.74532
105.6318854_414.862843___8597	14.6254	13.7679	15.4832	4.43027	35.2	28.0918	19.435	14.4216	24.1626	28.0005	22.7743	4.36941	66.0889	121.742	94.2832	65.9092	115.949	67.3628	34.4045	66.4117	55.8163	23.2649	69.0496	76.9333	62.533	51.5464	47.3161	76.9148	67.4039	52.8584	38.3871	69.5017	29.8758	20.5733	55.3131	57.6775
105.6520963_337.4267466___4872	4.88577	13.7935	19.3577	0.0402612	0.0400679	14.0818	3.89468	0.0328174	4.0341	4.018	7.60431	8.75423	18.0213	257.797	280.583	54.6582	66.9837	92.2122	3.98537	4.66618	10.3306	6.88975	0.0232272	0.0232341	6.29043	15.2404	9.65252	2.85808	0.0249155	8.43957	3.22271	2.93157	12.0155	10.4582	3.47453	6.49688
105.8271593_123.9453325___7323	0.044486	0.0417716	0.0352303	0.0402612	0.0400679	3.49245	0.0353867	0.0328174	4.00199	0.0365366	0.034555	0.0396846	0.0232039	0.0238966	121.556	0.0221872	0.0198348	117.335	0.0182778	0.0213417	0.0189364	0.0210019	0.0232272	0.0232341	3.10102	0.0274813	0.0290008	0.0257658	0.0249155	2.76875	0.0290452	0.0264366	2.96446	0.0314148	0.0313307	0.0293344
105.8495458_1097.747215__[M-H-CH3]- 121.875_24	368.643	407.344	491.098	512.463	472.929	305.934	329.933	329.291	361.151	366.019	331.267	461.096	46.1471	52.734	37.0012	49.1398	43.9183	25.08	36.4293	30.7279	31.5237	58.0738	53.8961	27.8996	237.907	301.796	218.372	232.158	383.454	207.984	260.248	205.318	250.499	270.836	297.41	220.214
105.9050173_1093.086798__[M-H-H20]- 124.916_24	585.948	376.924	308.131	709.354	422.156	445.093	420.734	293.052	343.597	270.285	478.435	371.786	30.5411	28.7421	25.2051	31.6568	43.5366	29.407	16.0492	23.4275	29.1571	25.331	38.2062	12.6978	237.346	231.399	192.279	174.484	221.8	235.06	198.47	168.148	166.763	138.734	215.757	210.404
105.8844825_337.4285571___4873	4.88577	9.19564	11.5988	13.3267	0.0400679	10.5614	19.4734	3.61546	20.1428	16.072	19.0108	8.75423	104.548	79.9711	128.197	21.8622	32.1454	18.4338	5.97805	4.66618	2.06613	11.4829	0.0232272	5.07559	12.5809	6.08392	16.0875	5.71617	8.264	19.6923	9.66812	5.86315	3.00388	10.4582	13.8981	6.48387
106.0422627_1096.235218___24	630649	417672	611082	622001	478785	511342	391321	505702	590388	541166	438001	680525	3536.93	771.683	4937.73	4831.49	697.975	4299.26	781.936	1952.43	4254.89	3429.31	9565.34	5175.03	355356	266534	167434	167912	233987	241546	184933	135365	377532	383878	413931	374405
106.1484266_1094.65392__[M-H-CH3]- 122.18 [M-H-CH4]- 123.198_24	5785.18	5919.53	7378.85	5334.81	6372.9	6478.02	7562.11	6709.24	8529.74	7197.08	4900.48	9029.82	22.8274	5.20631	15.999	33.9729	6.5125	22.5407	4.00197	14.0078	22.8513	4.5933	35.5282	68.3461	3670.8	6864.03	2893.92	3239.1	6571.18	6729.18	2338.49	2601.59	5915.56	4454.48	3945.32	5769.94
106.2962145_1095.528989__[M+Cl]- 71.3291_24	518.096	555.102	656.497	864.777	739.614	1096.54	626.127	572.812	672.911	628.728	478.723	744.249	33.4231	39.2376	41.2908	26.7874	19.6069	38.8538	20.0812	18.7427	22.9362	20.7459	46.3149	17.7941	372.717	558.472	216.157	288.619	399.052	495.003	343.991	407.073	438.962	313.144	390.317	443.485
106.3349692_415.6685443__[M+Cl]- 71.3651_6	222.909	243.051	264.4	31.0108	57.1949	31.6034	23.321	54.073	32.2142	7.99826	30.3738	13.1078	181.003	225.312	156.987	211.475	89.5788	122.061	186.117	160.187	163.374	159.12	224.386	147.027	43.6028	32.8941	28.3498	28.0665	37.9802	48.8691	41.2379	34.4508	20.6264	37.6711	57.973	19.1347
106.3458169_1093.080282___24	600.915	1263.27	1417.71	866.03	991.792	901.61	867.402	1145.92	1036.36	735.1	1197	1596.63	35.4118	15.5878	25.0675	17.0762	23.8091	22.483	23.9416	25.818	18.6387	32.0388	30.3711	15.1428	615.895	914.162	669.762	507.957	714.739	1073.46	431.675	747.515	809.903	694.68	630.205	848.149
106.4746943_1096.148301___24	991.965	1345.08	1509.23	1500.25	1704.71	1472.8	1612.42	1423.11	1575.03	1525.9	1042.07	1057.3	40.8563	41.9166	41.3606	53.3651	34.9383	52.1708	22.1362	39.9196	43.8659	46.1841	63.7265	78.9243	973.05	1265.07	779.864	577.324	953.468	1157.11	824.005	784.962	1119.39	817.408	705.864	1064.9
106.5139208_1093.660878___24	1606.42	1604.48	1713.83	1602.3	1869.79	1369.8	1484.7	1509.35	2290.33	1295.53	1420.27	1410.52	50.6998	72.8345	52.4695	50.8819	43.3326	54.4022	33.959	39.7978	37.3022	55.0238	73.5422	68.6875	707.159	1225.35	965.668	926.746	1335.58	1190.75	845.047	746.589	1130.34	1145.89	957.037	1031.5
106.5772535_415.6201564__[M+Cl]- 71.6111_6	176.686	282.387	498.009	26.5807	74.7933	59.6952	23.321	50.4681	32.2142	31.993	15.1869	13.1078	229.384	351.924	202.398	305.301	178.082	84.5577	181.353	306.178	252.465	227.97	239.017	276.542	95.5618	121.088	55.3714	47.0995	87.0672	101.451	81.8958	152.865	175.231	86.739	125.325	79.5035
106.6544862_1089.473115___24	1594.27	1578.18	1387.9	2162.73	2008.72	1423.83	2103.74	1359.98	1375.01	1509.57	1386.65	1597.98	33.0554	18.2596	45.7544	46.2055	28.253	45.1692	10.0206	58.4609	22.8648	32.1993	66.1392	50.6975	741.634	1061.28	1022.9	1134.17	987.88	987.393	872.531	653.725	908.146	981.714	713.763	940.454
106.7040937_1094.442749___24	1922.52	2538.03	1768.66	1118.91	2873.21	1709.92	1692.65	1906.38	2044.32	1387.84	1429.43	1961.72	43.3161	44.7762	32.3476	41.4368	30.7163	63.4244	14.1567	42.2139	12.5092	50.7097	72.071	73.6739	1130.77	1244.82	1009.61	813.92	1158.31	1240.36	1260.73	716.093	1078.46	972.729	1236.14	1211.27
106.772465_1096.851738___24	1956.77	1678.19	1508.97	1282.61	1364.33	1192.15	1208.44	1230.73	1584.29	1424.82	1736.24	1846.78	68.9451	39.3237	87.3752	61.9527	39.3056	56.7468	22.1362	46.6824	31.3328	34.6381	73.3884	28.0219	871.144	1097.71	747.928	860.304	882.622	1007.61	796.424	756.651	1331.23	740.557	1181.68	1220.67
106.8239028_416.236912__[M-H]- 107.83 [M-H-H20]- 125.854_6	426.064	202.761	589.653	0.0402612	30.8351	35.1582	23.3552	32.4872	20.1323	3.99913	30.4128	21.8178	138.675	178.012	123.175	191.897	154.404	36.9695	161.588	72.4958	164.951	173.755	37.3641	62.1287	37.0111	94.9614	49.0391	30.8709	29.8416	55.1878	34.72	25.7586	50.1317	51.3669	32.6197	30.5533
106.9052369_1095.361239__[M+Cl]- 71.9378 [3M-2H]2- 71.9378 [M+2Cl]2- 143.874 [M-H+Cl]2- 179.851_24	1647.76	2143.89	1497.57	1285.28	1621.3	1168.68	1657.21	1340.52	1997.13	940.285	1066.28	2052.15	61.5853	21.0529	50.7873	51.1455	35.0781	47.899	24.2474	46.8684	25.1691	46.4198	56.4817	40.9193	684.953	1121.5	838.801	690.042	932.992	823.035	1133.85	737.693	909.482	604.144	641.261	1285.07
106.9282424_1127.104256___9511	331.054	353.046	284.522	225.613	295.742	231.076	250.057	162.335	216.866	190.865	196.771	320.343	83.298	81.3346	76.2262	71.9847	94.9178	60.7709	62.0778	95.6455	83.4246	84.7423	70.8832	96.0749	147.24	278.802	111.496	157.241	163.775	170.871	198.126	156.775	132.839	187.246	135.274	182.433
107.0169856_542.3342__[M+Cl]- 72.0524_50	1052.11	865.979	890.164	80.5288	85.3803	64.5521	170.312	155.065	102.773	82.5615	95.2196	56.9966	107.949	145.293	147.779	60.4836	24.0976	40.5247	42.31	18.5947	12.3717	110.241	88.1334	138.794	431.505	593.35	620.312	30.3454	32.9644	25.2261	19.1617	37.9117	23.9051	24.2951	20.7183	42.2438
107.0399995_1093.197158__[M-H-C4H8]- 164.108_24	163570	158874	158004	157179	150159	141182	137566	140216	148882	140159	122878	165807	1109.24	244.777	1600.76	1284.12	275.159	2580.62	178.78	711.004	1238.39	1005.68	2569.97	1718.04	66899.1	80450.8	69593.7	60952.1	76044.6	79255.2	72340.4	61076.4	71471.1	69497.1	85296.2	78976
107.0517472_233.9536779___6620	43.8849	59.546	34.6623	61.9835	113.876	42.0796	73.6617	79.3806	79.8032	120.333	98.419	117.685	623.465	591.578	584.573	186.369	255.687	193.391	221.09	165.68	220.354	226.822	269.151	251.501	462.364	642.633	563.356	167.953	143.959	237.986	139.428	148.949	91.3155	110.765	124.542	132.504
107.0537589_415.7211597__[M+Cl]- 72.0886_6	178.114	157.436	309.451	79.6489	107.933	69.4437	69.8825	43.2076	49.7596	127.835	68.2644	52.3628	203.06	277.505	214.318	217.415	151.32	158.484	92.6662	171.729	151.2	177.522	234.723	179.456	125.906	146.981	91.1073	87.3382	117.492	69.338	66.194	87.056	108.899	104.869	109.007	127.804
107.0310869_1203.564367___9634	0.044486	0.0417716	0.0352303	0.0402612	0.0400679	0.0319682	0.0353867	0.0328174	0.0365954	0.0365366	0.034555	0.0396846	0.0232039	0.0238966	0.0209605	0.0221872	17.6365	0.0207037	2.0205	9.43567	29.1583	13.3513	27.1155	0.0232341	0.0283566	0.0274813	0.0290008	0.0257658	0.0249155	0.0253439	0.0290452	0.0264366	0.0271353	0.0314148	0.0313307	0.0293344
107.2045731_1091.066923___24	2118.83	1794.32	1902.1	1561.71	1732.39	1599.86	1232.8	1451.31	1464.62	1604.44	1689.65	1477.73	38.3905	52.5062	41.4526	34.0242	35.0198	79.6247	51.66	32.7384	39.7467	60.1898	79.374	71.4327	776.213	1186.46	771.473	1003.02	1086.37	1025.22	792.699	457.39	1131.29	800.143	1139.85	1089.33
107.2951327_415.5615719___6	38.9921	52.8613	46.3907	22.1253	26.3977	61.4481	38.8252	21.6292	12.0803	15.9791	15.1655	21.8196	87.596	92.6504	62.4862	99.9155	107.198	74.1323	66.9177	75.1344	92.0777	51.782	57.0256	75.7598	39.1518	60.5297	31.4998	27.8473	47.545	30.7193	34.3203	34.4508	58.9325	30.8218	30.6916	12.7564
107.3394722_1093.167665___24	1325.39	1307.51	1073.53	1195.74	1493.6	1371.8	1192.75	1222.26	1357.01	1442.77	1105.75	1316.88	48.3812	44.4335	27.5114	41.4033	21.7749	65.6316	16.0552	46.867	39.5822	20.7319	68.7877	50.8014	581.054	906.882	701.584	620.159	791.313	550.455	713.54	511.587	732.32	434.224	769.394	860.744
107.4249548_1094.52605__[M-H+NH3]- 91.4025_24	1763.98	912.758	1185.07	1407.86	1231.61	1058.93	929.265	876.992	1617.37	1252.85	957.785	1112.79	50.728	28.6281	38.8017	55.7587	32.5169	34.0239	29.9638	39.6577	26.9548	34.409	43.1343	66.1873	512.602	704.186	662.4	541.968	630.935	738.577	497.299	470.716	813.164	685.251	530.444	693.369
107.4837186_1095.248342___24	1146.2	965.375	916.155	890.92	982.089	1302.37	1040.5	817.709	1217.65	886.928	910.883	1234.19	40.8868	49.5032	34.2747	53.3972	32.5527	45.4301	37.9997	30.3614	37.3688	22.9531	58.7943	56.0843	565.552	1014.36	540.119	675.084	449.402	620.307	654.747	412.248	498.218	529.444	539.647	1024.03
107.5315499_415.6555133___6	48.7402	41.3038	38.6589	35.4005	17.5984	49.9481	34.9816	61.2827	36.241	27.9635	18.9568	4.36391	63.1571	84.189	50.7891	67.1721	52.7841	51.9022	41.8926	91.9376	80.2394	69.7802	60.8074	65.1618	36.9613	66.5826	34.6498	44.9064	38.439	19.3157	25.2439	17.2254	29.4662	37.6711	23.8712	64.547
107.6248571_1091.748838__[M-2H+Na]- 86.6536 [M-H-CH2]- 122.636_24	816.472	1027.28	1182.27	1288.34	958.258	679.699	911.768	818.849	740.266	1056.83	947.668	1135.66	40.9498	23.4913	48.0783	34.0242	15.2211	18.1999	10.0864	25.723	27.0405	43.9849	48.6486	33.3858	371.238	527.742	570.839	401.187	818.954	526.149	566.277	385.87	614.335	620.362	682.914	588.47
107.6801366_1092.448948___24	798.118	1057.9	945.981	1115.44	900.339	944.165	845.475	1225	814.76	846.77	819.666	1070.14	45.5581	33.7732	36.4613	65.3326	30.2983	42.9632	31.9266	30.2656	45.5612	22.9	45.5846	33.1048	581.53	799.212	321.605	385.515	587.191	743.307	445.692	344.93	843.101	393.939	573.695	639.127
107.7738206_1091.592811___24	661.071	817.564	732.293	662.7	892.593	594.733	461.135	728.229	733.814	748.756	651.098	595.517	12.6471	15.7058	22.961	21.9551	21.8077	38.2212	9.97565	14.0826	16.6923	13.7309	35.433	17.6666	435.493	555.725	435.93	427.934	746.357	708.621	298.8	362.586	511.48	358.268	481.6	478.85
107.7633172_415.1433541___154	29.2871	22.9747	54.1225	48.6756	48.4577	35.1567	23.3504	28.8757	40.3192	24.0004	15.2061	17.4776	66.5693	60.8002	34.6862	37.6821	17.2831	22.6195	48.0442	61.8592	56.262	53.448	64.115	30.8006	30.8336	35.9357	18.9264	28.1023	16.2973	30.3914	18.9552	28.7497	11.8018	27.4311	34.144	28.7365
107.854449_1092.940343___24	808.369	907.992	548.032	1277.71	752.464	600.167	566.738	656.147	627.611	619.703	591.486	809.349	22.9503	31.3873	20.6508	21.7775	13.0732	22.6695	10.0524	20.9531	22.9334	25.3757	48.4801	35.5933	463.749	479.331	338.607	281.056	450.106	549.054	341.278	309.658	493.416	398.078	405.709	496.225
107.9049312_1093.372524___24	697.581	716.649	481.809	644.59	888.103	641.052	694.799	435.452	471.858	657.3	456.976	471.092	30.8141	20.8845	27.5008	21.8954	15.2352	25.1099	12.0368	18.7244	8.33203	11.514	33.4089	25.6235	283.272	338.97	434.061	298.16	334.732	378.044	267.931	205.687	241.763	367.644	211.924	387.681
108.0233672_255.2632225___8361	136.378	82.3537	53.8716	84.0076	93.8894	72.7816	85.2016	118.842	99.6983	72.1966	79.3965	104.504	85.4274	108.551	72.6138	222.918	199.79	156.912	133.168	200.578	168.115	106.131	105.275	115.104	80.9941	114.597	109.479	224.543	226.773	225.772	125.227	139.763	143.463	131.293	58.7076	74.1079
108.0091649_1117.072794___5258	88.4994	182.061	144.017	352.312	133.91	147.146	252.973	97.56	93.2107	247.068	78.108	234.321	739.042	275.96	381.133	437.756	361.482	422.707	398.139	604.278	391.474	403.895	414.118	530.267	145.54	241.001	142.005	149.577	163.197	212.641	161.579	72.6555	169.611	238.284	215.577	831.206
108.0471193_179.0647334___214	24.3978	36.6106	15.4026	53.1876	30.7492	31.6104	31.0654	28.8109	31.988	44.1795	37.8952	56.7149	12.6219	26.0167	18.1482	70.2877	113.716	88.0492	58.6242	53.3823	61.7035	50.4222	58.2626	68.2416	62.4617	42.36	60.8531	39.8075	27.4114	38.9628	25.698	40.8871	38.9174	31.1324	24.2334	29.0554
108.0478521_1089.53238__[M-2H+Na]- 87.0662_24	6988.9	8226.37	8547.38	12408.7	9874.67	6450.65	5720.78	6463.09	10257.5	6718.4	6516.29	8452.31	114.399	89.1338	160.279	166.845	51.4824	131.652	66.4087	107.433	90.6218	145.833	158.119	221.034	3684.36	2028.68	4170.34	2016.84	2463.58	5096.07	3191.91	1991.16	2202.83	2326.23	3863.03	2570.3
108.0568492_1026.337107___7167	3364.83	3304.72	2810.7	3213.52	2592.03	2230.41	2614.56	2582.47	2106.9	2819.64	2244.82	2551.59	53.1528	26.5676	27.3713	38.7314	17.2992	40.501	21.9674	39.606	47.5806	16.0366	70.9456	60.5664	1100.91	1677.97	1302.51	1665.7	1492.62	1535.62	1749	2126.41	1494.9	1878.62	1402.27	1731.21
108.2149995_1092.088329__[M-2H+Na]- 87.23_24	781.839	420.04	343.296	661.652	400.063	340.004	326.688	477.381	385.634	485.87	709.627	736.433	17.7831	15.6353	20.5698	19.4452	13.0251	6.77399	30.0155	9.346	27.0101	20.6704	25.4213	25.5622	308.115	428.528	192.566	184.752	325.732	300.672	285.472	197.205	271.056	214.69	372.75	512.711
108.4175751_1095.453279___24	274.387	325.711	470.654	528.125	333.047	242.5	319.838	630.675	330.619	361.977	396.2	485.118	10.1802	26.1363	25.2124	14.6264	21.7672	22.6237	18.0522	18.761	18.7657	20.7215	17.8264	25.3868	169.393	323.256	165.166	160.089	277.492	219.147	149.652	145.459	261.346	172.788	179.975	374.641
108.480292_456.7175319___2416	14.6485	27.5998	23.2439	158.254	189.055	223.341	77.8348	39.637	55.616	40.0805	42.4876	30.5969	5.1458	7.92332	9.26435	9.81831	0.0198348	2.30001	8.0995	2.36416	4.1956	4.64713	12.8911	7.70144	6.18094	27.352	9.6182	8.52981	8.24613	14.0181	12.8197	20.4258	2.9886	10.4089	3.46281	12.9475
108.5649019_1093.121455___24	377.197	266.841	467.286	409.486	393.513	314.969	533.665	206.923	306.6	252.708	408.271	381.64	7.60352	15.608	9.12856	19.3837	15.1712	13.5167	21.9785	13.9974	16.5935	4.58628	15.2154	25.5107	205.606	305.981	128.241	150.533	219.297	396.517	161.585	168.444	172.074	225.948	257.56	173.003
108.6469873_1091.580455___24	341.741	356.875	285.746	302.92	262.381	277.85	274.716	254.763	273.216	294.076	256.367	290.946	22.9283	10.4617	31.3189	21.9386	34.8629	22.6475	22.0676	16.4158	31.2713	25.331	7.64901	30.5099	161.371	282.169	170.108	158.691	166.151	153.008	201.939	177.725	157.454	152.53	120.325	152.921
108.721962_456.6223948___2417	4.88843	4.6062	19.3699	151.515	144.524	138.211	46.7614	25.7265	24.1756	4.00805	7.61042	17.5082	2.57807	2.64703	11.6034	4.90916	0.0198348	0.0207037	0.0182778	7.00188	0.0189364	6.97069	5.15645	7.71683	3.09546	15.2265	6.41213	8.52981	8.26331	22.4735	6.40983	2.91797	5.9772	10.4089	13.8512	9.7329
108.9382097_1145.893899___7665	110.255	77.6726	99.7371	119.113	145.39	73.4367	100.418	57.8671	92.6892	48.495	125.172	91.1347	43.0553	91.3428	70.797	26.6954	83.2473	36.0643	76.0446	46.7035	31.1108	55.0513	43.1298	30.3856	112.907	172.77	137.236	117.211	146.55	189.1	101.721	110.777	139.23	121.43	145.155	165.292
108.9592431_456.7175319___2418	19.5268	18.3992	23.2388	100.648	114.7	198.435	58.3861	50.4282	52.3098	36.0724	11.3999	26.2229	12.8642	13.2082	16.2109	16.9383	8.76312	9.18162	16.1624	9.32331	16.7451	18.3545	7.71911	15.4035	37.6309	21.2702	28.9144	11.374	13.7454	11.2145	9.61535	8.77222	17.8983	17.3836	20.7793	25.9043
108.9905233_127.1534074___8076	9.63881	13.8355	11.4501	26.6498	78.1064	38.0695	65.2365	18.0904	24.223	23.7659	71.8224	13.1592	0.0232039	0.0238966	0.0209605	0.0221872	0.0198348	0.0207037	0.0182778	0.0213417	0.0189364	0.0210019	470.318	0.0232341	6.14152	0.0274813	9.40896	61.3799	0.0249155	109.138	89.0968	111.386	131.398	82.9213	40.7355	0.0293344
109.0423317_1112.17078__[M-H-CH2]- 124.066 [M-H-CO]- 138.056_14	26237.6	12960.4	10967.1	11725.4	12860.1	9657.49	10479.4	10131.3	11543.7	557.614	9491.63	11866.7	60.7659	645.328	664.522	446.689	544.084	491.591	501.47	353.416	447.272	614.083	716.398	645.365	5319.74	6908.82	5534.14	3643.67	5761.3	5301.75	5306.94	4486.54	5047.42	3531.99	9488.21	9692.56
109.0303178_232.0355686___6621	143.632	147.498	215.089	101.111	180.058	128.496	424.467	399.493	181.255	144.732	116.856	67.2709	134.737	140.955	128.629	125.52	106.038	261.352	102.541	121.132	90.097	122.013	162.967	178.548	142.39	207.903	147.649	160.895	124.004	196.169	158.542	225.528	231.897	100.38	79.5682	93.6817
109.0674949_426.16582___13	34.1722	73.4989	66.5532	79.8015	83.6525	80.9652	38.895	18.0272	28.2016	44.0956	34.2546	34.9337	217.554	271.435	195.744	69.285	41.042	52.0219	37.7864	87.635	78.6359	22.9259	32.952	61.3081	101.979	139.61	114.283	98.5164	103.194	129.084	25.2843	31.6228	43.0372	34.2436	51.2615	44.7048
109.2045814_456.8126689___2419	4.87665	32.1587	7.74796	73.4914	88.2306	60.8473	19.462	17.9934	24.1142	8.01609	18.9998	26.1897	5.1457	10.5448	6.94754	7.36374	2.1868	9.18162	4.04059	9.45664	10.4657	2.32356	2.57304	0.0232341	6.27182	15.1649	16.0303	2.84327	5.48765	25.1867	6.40983	0.0264366	0.0271353	20.8178	13.8512	12.9248
109.3593129_759.9418697___2221	14.5157	41.5963	27.4339	13.1835	48.9502	35.3949	23.5591	32.992	28.6675	36.4844	26.7149	22.0707	10.2512	2.65948	6.97993	7.3714	0.0198348	0.0207037	8.10293	16.4784	2.09039	16.2545	10.2601	20.6049	36.4849	15.0414	15.4283	16.8095	16.5544	16.9097	18.8006	22.9449	17.6935	60.6435	23.5578	54.9619
109.4409235_455.7522908___2420	14.7552	9.26914	27.305	22.382	53.2411	60.4364	15.7101	10.8854	24.3305	8.09384	7.66947	13.2109	7.57511	20.7353	4.54134	4.8188	2.15026	6.75255	0.0182778	9.28344	6.15639	13.6863	10.1016	10.0718	12.3108	14.9161	6.29113	8.37378	5.39469	13.762	12.581	17.1877	11.7353	17.036	10.2012	12.7188
109.4530576_401.3656258__[M+Cl+NH3]- 57.454_1	29.6284	48.2172	79.0456	26.5898	40.1805	28.4883	39.3838	28.9058	28.1894	36.5195	23.0558	21.8361	25.6256	26.3489	11.5397	19.3732	17.4953	27.4568	18.1124	25.5986	33.4054	4.5856	10.2721	23.0586	124.602	139.976	72.1141	19.925	57.3579	49.0859	28.7976	75.0193	21.0787	13.8872	17.2907	35.5298
109.6095123_760.9968416___3614	14.5011	4.559	11.5957	13.169	4.38926	13.9655	11.6191	32.5403	20.1911	15.9976	3.76465	4.35408	2.59855	13.3112	11.6314	9.84037	13.4004	0.0207037	2.05356	4.77282	6.35532	9.41543	2.60004	5.22253	15.1845	9.03131	15.4308	5.52775	5.52149	22.5566	12.3703	14.1512	11.6436	16.6231	26.5618	32.35
109.9366251_985.7202385___3801	1357.44	1634.18	1187.68	452.499	1395.87	1273.67	1197.97	1029.69	1164.55	1724.94	1418.64	1179.8	111.804	124.507	93.4476	111.544	104.321	76.5987	121.821	123.595	118.047	142.238	106.074	121.307	734.417	560.525	853.208	725.515	319.116	632.045	930.79	850.326	832.109	967.364	926.74	781.817
110.032766_982.8985398___2166	132.866	185.282	51.3558	378.497	97.4973	88.2609	238.662	16.4885	597.32	136.264	15.9101	142.776	61.1884	59.2279	53.7924	56.1355	54.5887	45.6271	36.1674	42.2331	43.6056	41.4915	22.9528	35.6243	124.348	105.245	250.701	274.739	211.204	25.4819	110.561	447.044	1389.88	735.867	180.429	292.879
110.0381994_1097.582508___24	10336.5	5302.12	5833.24	9882.56	5991.83	4037.43	3819.6	8047.71	6929.18	4915.55	6206.67	5759.39	208.554	255.887	197.698	246.255	155.79	241.445	188.517	214.068	185.251	228.205	314.282	270.943	5144.66	3853.97	2698.78	2714.77	4688.02	3697.14	2611.75	5820.37	4988.47	4717.35	3878.73	4749.92
110.076828_123.5077055___7324	0.044486	9.13843	0.0352303	4.40288	0.0400679	0.0319682	3.88268	10.7953	4.01345	4.00922	0.034555	8.70449	0.0232039	0.0238966	0.0209605	0.0221872	0.0198348	2.26183	103.691	132.493	111.769	0.0210019	5.0776	0.0232341	0.0283566	0.0274813	0.0290008	0.0257658	2.73099	5.55281	6.34034	8.6644	5.9453	0.0314148	3.42799	3.20633
110.4256019_337.43645___4874	4.88577	9.19564	7.74309	0.0402612	8.80929	14.0818	19.4734	0.0328174	12.1023	12.054	11.4065	13.1313	40.1115	42.8409	61.7132	19.4331	35.0477	23.0423	1.99268	6.99927	0.0189364	2.29658	2.58095	2.5378	9.43564	24.3847	12.87	2.85808	8.28072	28.1319	9.66812	20.521	9.01164	24.4024	3.47453	9.74532
110.6672461_337.4285571___4875	14.6573	9.19564	0.0352303	8.88446	4.41056	14.0818	3.89468	3.61546	4.0341	12.054	19.0108	8.75423	56.0866	53.9542	71.9943	14.5748	24.0953	13.8254	7.97073	9.33236	6.19838	2.29658	0.0232272	10.1512	9.43564	24.3847	9.65252	8.57425	0.0249155	8.43957	12.8908	5.86315	3.00388	6.97213	3.47453	6.49688
110.6801524_124.045518___7325	0.044486	0.0417716	0.0352303	4.39238	4.37731	10.4492	7.74288	7.17406	16.008	3.99724	3.77695	21.6991	0.0232039	0.0238966	0.0209605	9.70456	0.0198348	2.25557	0.0182778	0.0213417	0.0189364	235.779	2.53285	133.898	0.0283566	0.0274813	3.16097	0.0257658	10.8933	16.6125	9.48858	14.4007	14.8223	6.86744	13.6787	12.7952
110.790526_701.4161486___6268	9.69201	0.0417716	19.371	0.0402612	13.2109	10.502	11.6455	10.8659	20.2341	16.029	3.7695	0.0396846	0.0232039	5.33352	4.68503	9.84186	8.82464	2.29762	8.11122	2.35496	6.2846	4.65343	5.14567	7.746	12.2465	5.99647	3.09	8.37555	5.44955	8.3286	6.27112	5.6983	2.93006	6.72592	13.4838	9.62428
110.8902955_368.0252088___669	14.8232	18.6121	0.0352303	4.49542	35.6901	17.7926	15.7465	21.9474	8.14762	20.3624	26.885	8.86716	17.6972	26.0184	27.3704	45.9554	10.784	11.3076	5.95643	2.32649	16.4817	9.15391	17.7417	12.6527	92.6706	118.803	79.082	33.7178	13.5605	24.8496	18.9692	23.016	14.7587	30.8	23.9213	31.9153
110.886212_406.9154943___7932	19.5719	27.6393	34.9147	31.1888	17.6783	35.2661	42.9139	47.117	28.6613	16.0632	38.0746	26.3439	33.7166	15.6894	9.1591	12.1538	21.6517	20.4231	17.9678	4.67361	12.447	4.60473	15.3075	10.1737	52.5946	22.0037	44.3179	31.0006	27.2345	27.6845	12.6713	34.6261	14.8013	17.1979	13.6956	22.4012
110.905161_336.3949896___4876	9.77155	4.60424	11.6146	4.4423	26.4567	14.0819	0.0353867	21.7557	4.04008	8.03612	0.034555	4.3772	7.60873	43.1412	18.2751	14.575	28.0736	18.1572	11.9533	7.00087	8.26475	6.88989	5.0931	2.53786	15.4921	24.0212	12.6789	11.2626	8.14587	11.0852	15.8753	5.77599	23.6735	17.1711	6.84576	12.8039
110.9773556_1141.664317___128	555.168	392.835	342.084	419.372	508.372	400.193	347.362	325.08	401.199	428.926	392.608	408.307	96.4966	63.5384	98.2606	34.512	56.7995	67.6864	44.6507	61.7925	48.5699	62.9061	53.4126	48.1262	453.161	250.067	533.147	553.361	207.477	151.907	540.202	467.746	567.647	621.864	588.275	276.078
110.9771614_1091.753065__[M-H-C3H2O3]- 197.984_24	533.844	568.576	390.457	550.077	586.313	542.942	677.627	426.439	400.461	761.634	745.3	523.798	145.661	344.671	342.937	212.091	154.033	94.9477	205.403	149.185	159.411	167.213	198.126	178.849	960.98	264.899	1552.21	924.574	305.031	216.588	1107.06	915.577	976.076	928.388	913.565	460.807
111.0064928_128.966956___8061	172.803	240.585	231.022	23791.7	43942.7	31961.6	49113	40341.4	42303.9	39692	43432.8	37100.2	1573.73	1595.86	1240.8	33036.1	42154.6	28662.5	26361	20193.6	20451.9	11069.1	10431	11857.7	519.414	0.0274813	681.828	23352.2	22493.8	41421.8	31249.1	43008.2	39976.1	24195.1	16255.8	24174.2
111.0107698_309.4072345_[7][M]-_[M+Cl]- 76.0471 [M-H]- 112.02_117	5290.47	6840.59	5270.82	3179.07	4356.6	3499.96	4072.36	4166.92	4795.67	2942.21	3089.61	3244.55	4355.73	4196.97	4166.7	3846.86	4279.65	4060.48	1838.39	2048.63	2219.33	1149.07	1368.66	1315.11	6427.31	13424.5	8936.25	2151.01	1786.27	3366.06	2104.27	2675.6	2253.61	1798.25	1367.3	1583.05
111.0103933_369.3974047__[M+Cl]- 76.0447_4	1590.23	2027.66	2346.29	3116.54	4660	3252.54	4236.33	3728.27	3761.16	2995.75	2832.43	2939.9	2488.56	2234.19	2407.35	3015.21	2977.2	2688.12	1110.31	1033.98	1161.73	613.87	789.892	845.014	57069	61284.9	63924.2	6145.24	4903.12	10206.1	2990.09	3836.63	4054.05	3185.85	2267.87	2517.63
111.0109204_1199.904059___9621	0.044486	0.0417716	0.0352303	8.55344	4.25247	0.0319682	15.0357	6.96517	0.0365954	0.0365366	0.034555	0.0396846	0.0232039	0.0238966	11.5534	0.0221872	10.5358	4.39847	18.1058	0.0213417	0.0189364	24.4773	0.0232272	12.3401	0.0283566	8.75851	0.0290008	#VALUE!	10.5819	10.7691	0.0290452	0.0264366	20.1682	16.6869	6.65617	15.581
111.0104778_637.1130617__[M+Cl]- 76.037_96	621.974	815.36	818.522	548.941	779.747	776.777	705	539.106	678.361	435.768	527.861	431.742	91.6102	159.526	160.033	476.708	324.56	274.005	213.161	177.211	225.027	212.876	219.492	201.768	2825.09	3726.74	3395.05	561.325	461.225	888.109	461.243	600.852	533.401	433.212	285.352	462.837
111.0106719_589.94518___7609	394.035	628.656	550.092	10640.8	18397.5	12058.3	2915.58	1825.74	1981.67	1384.76	2903.87	2623.48	127.022	117.735	129.549	343.253	403.984	326.779	190.545	156.655	210.008	231.893	280.339	260.78	849.744	1112.38	925.166	543.977	444.678	866.152	423.11	465.276	547.245	430.577	323.171	418.809
111.010682_268.2184318__[M+Cl]- 76.0386 [M-H-H20]- 130.029_39	1621.82	1622.83	1500.64	1138.98	1650.22	1315.95	1579.22	1458.33	1771.86	1172.65	1215.04	1334.82	1825.8	1978.27	1865.16	1426.57	1644.85	1772.21	829.156	842.103	855.206	413.832	515.096	502.937	1737.67	2432.04	2009.41	912.281	808.639	1261.83	1006.95	1349.75	1164.62	871.707	592.533	715.169
111.0104095_495.9406126_[8][M]-_[M+Cl]- 76.0383_48	4733.19	5635.97	4261.95	2599.1	3450.33	2686.08	2394.89	2522.8	2488.49	2305.86	2523.17	2035.39	308.276	373.149	399.232	1373.99	1524.84	1306.79	623.311	148.342	101.296	354.551	469.988	473.879	9242.55	12099.2	10319.8	1911.8	1370.15	2567.1	1217.23	1714.65	1429.69	1196.55	784.879	1039.5
111.0107331_429.0027564__[M-3H]3- 336.047_46	789.459	1105.91	862.47	8025.36	11377.5	8772.96	15408.6	8083.44	8234.45	12547.8	6743.32	10874.1	236.809	272.168	296.761	8680.34	9036.89	8049.04	1704.06	1853.34	1681.38	496.422	592.114	677.346	2292.15	2751.56	2412.45	2874.88	2581.74	4189.5	2078.95	2594.25	2241.88	1274.85	927.015	1273.15
111.0106138_167.9937609___217	563.306	682.665	511.693	6488.01	9440.48	6920.86	10616	9221.63	10938.7	7975.13	8729.26	9323.62	839.358	1255.92	1498.08	6989.21	8288.88	8016.72	5773.82	6055.46	5127.35	3036.91	2665.95	2826.19	923.94	1962.65	1137.38	5455.05	4933.61	8911.19	7586.9	9247.01	8165.88	5597.78	3867.78	5086.21
111.0831113_297.8544149___3465	34.1486	976.872	50.1352	31.0512	57.2292	38.6387	34.9775	21.6953	40.1128	28.1435	34.1203	26.2338	30.3799	41.8353	22.8382	1184.24	38.9433	31.7108	27.8483	27.9226	20.6458	36.7629	53.3852	27.8923	2208.19	2691.44	69.7311	1479.29	94.1452	2291.16	194.073	49.0934	100.697	2642.19	625.946	173.849
111.083492_373.3231104___6393	253.753	815.298	200.943	321.66	788.068	618.253	748.219	216.838	260.47	270.765	611.181	258.164	178.399	563.103	585.833	277.968	502.469	211.962	470.724	169.045	232.672	197.127	247.252	228.227	902.261	1070.73	1006.09	848.563	638.546	1026.31	581.791	596.001	598.483	952.17	746.861	854.245
111.1208006_127.8637166___8077	0.044486	4.60309	3.86965	62.0771	277.785	159.381	205.046	208.246	110.671	165.031	193.127	91.0412	0.0232039	138.613	0.0209605	0.0221872	0.0198348	122.904	0.0182778	0.0213417	0.0189364	0.0210019	0.0232272	0.0232341	0.0283566	0.0274813	3.13483	225.885	296.4	701.366	226.825	503.583	517.132	0.0314148	129.749	268.769
111.1728757_129.7923519___8218	4.91655	9.22469	3.88387	31.1151	233.612	91.6577	56.5499	68.9404	152.046	72.7155	108.192	30.6601	2.50644	0.0238966	344.815	127.697	369.098	147.747	197.347	354.824	0.0189364	2.27081	125.631	381.898	3.13092	5.95353	3.20061	101.965	114.379	267.785	70.4896	209.418	264.989	137.037	69.1526	116.485
111.2686633_128.4506465___8078	4.90429	4.62276	0.0352303	17.8088	4.42698	50.0918	81.2626	43.4265	92.8627	47.4201	45.7392	13.1628	128.415	0.0238966	0.0209605	0.0221872	0.0198348	0.0207037	102.175	235.251	207.469	0.0210019	0.0232272	0.0232341	6.14918	0.0274813	0.0290008	54.4936	21.5816	106.668	34.5626	83.9312	87.6712	17.0315	16.9843	41.3018
111.368049_447.9950968___2834	19.4767	27.5584	15.4413	22.187	39.5674	41.8566	15.5489	25.1697	28.1215	24.0123	18.9677	30.5393	10.2725	5.26869	11.5542	14.7079	6.55792	13.7421	12.0954	2.36104	8.35618	6.9624	7.70621	10.2572	24.7026	6.07049	28.7879	11.3593	5.49054	11.1936	0.0290452	5.82762	8.95301	10.3997	17.2968	9.70715
111.406122_128.192256___8079	0.044486	4.60262	0.0352303	44.4357	48.5811	69.9126	147.915	115.011	151.225	68.5171	106.528	56.9222	0.0232039	0.0238966	0.0209605	376.579	155.433	0.0207037	0.0182778	125.898	117.806	0.0210019	0.0232272	0.0232341	0.0283566	2.97357	0.0290008	49.8655	72.532	119.112	97.1593	88.0322	100.602	23.8258	23.778	48.2394
111.5339133_128.8286101___8080	9.81064	0.0417716	0.0352303	40.8416	48.5811	91.0618	223.048	150.756	188.06	125.12	131.801	48.1649	0.0232039	0.0238966	114.177	0.0221872	293.107	138.792	197.347	354.38	0.0189364	0.0210019	129.446	0.0232341	6.1426	8.92071	3.20061	106.556	116.248	166.5	174.375	182.142	122.639	23.8258	53.3311	137.172
111.5788768_130.5887767___8219	4.88682	13.8107	7.75262	105.533	68.5011	94.7508	167.328	176.773	124.742	147.568	193.925	93.9901	131.962	0.0238966	0.0209605	126.336	0.0198348	264.63	0.0182778	0.0213417	227.354	126.071	7.52887	0.0232341	0.0283566	3.02814	3.19571	113.378	114.539	188.043	116.149	178.638	195.489	103.921	62.2475	129.438
111.5871101_368.2720137___670	9.83621	32.4597	19.5002	13.4198	35.522	28.3366	19.5939	18.2313	12.1826	20.2188	19.1153	22.0561	17.9034	21.031	20.7173	21.9666	19.6185	18.282	6.00991	7.04273	4.15792	4.61818	5.11443	2.55323	245.416	215.945	367.635	28.3499	36.5332	36.3036	6.38086	31.9301	8.9344	27.6282	17.2402	22.6006
111.6454658_127.4286799___8081	0.044486	0.0417716	11.6089	84.2475	52.7927	101.999	125.489	68.4949	188.623	162.1	135.065	47.9761	0.0232039	0.0238966	237.033	0.0221872	0.0198348	0.0207037	395.443	0.0213417	0.0189364	0.0210019	129.115	0.0232341	0.0283566	0.0274813	3.13483	129.456	122.821	206.013	146.048	149.134	0.0271353	0.0314148	61.0747	0.0293344
111.7444035_368.5706469___671	9.82288	13.8735	34.997	35.6902	35.4756	10.6125	31.31	18.1774	28.3472	20.1925	22.9039	17.5964	10.202	18.3499	11.4944	12.1873	19.5662	29.6102	9.99174	9.3659	2.07626	13.4655	10.2158	17.849	264.832	129.17	312.286	25.4487	32.7995	77.9767	25.4906	28.9601	14.8712	41.3387	20.6606	28.9756
111.8549394_439.1077626___9	43.7504	22.8942	69.3281	53.0953	200.914	73.5939	54.2863	43.0756	88.2284	31.9837	30.2757	60.8658	5.05298	12.9537	36.3875	21.7002	21.5271	37.3681	9.9168	6.96493	10.2859	9.13107	5.05386	10.095	24.6417	17.9178	6.29041	22.3489	18.9263	19.2827	18.878	17.1825	17.6115	17.0443	20.4203	12.7348
111.8842964_368.0256319___672	4.92517	23.1527	23.3951	17.8937	4.44685	14.1886	39.2433	32.7636	12.1652	28.3524	15.3137	44.115	17.8776	34.1281	13.8093	12.2211	19.5915	25.0924	2.00608	14.1056	10.3952	20.8098	7.67194	5.10627	262.079	283.87	310.215	31.2301	32.8422	36.251	22.3641	17.4401	11.9298	38.0419	17.2651	29.0145
111.9379968_1122.23958___5112	438.597	505.753	476.21	460.576	635.323	467.354	436.513	403.4	452.183	516.863	430.862	520.48	40.5004	28.6122	38.2306	39.3089	26.0137	49.4594	15.9751	28.3217	35.642	46.4585	45.5577	37.8346	195.929	149.226	308.077	189.4	158.208	207.88	203.99	225.539	236.855	232.75	223.97	204.646
112.0140953_309.4457795_[7][M+1]-__117	330.321	395.218	302.066	181.13	258.495	238.42	208.894	191.039	300.155	153.757	132.309	209.289	234.976	195.254	308.524	199.937	223.798	229.474	122.676	131.83	120.945	41.2844	81.2136	93.5983	389.8	835.08	600.068	137.275	102.694	222.86	110.003	180.931	117.775	105.732	81.7092	116.079
112.0140422_369.196938___663	132.785	162.069	159.344	201.126	261.094	190.079	250.859	237.616	255.609	173.92	179.645	193.835	168.74	175.129	139.455	163.526	189.089	194.061	74.1066	91.5518	98.5441	34.6349	71.1677	74.0409	3530.38	4041.68	4379.3	408.61	274.429	533.545	178.106	229.38	254.167	189.352	141.368	135.401
112.013369_495.19403_[8][M+1]-__48	195.343	272.074	197.455	133.294	196.113	186.386	144.378	105.348	167.811	216.605	136.813	109.128	40.5763	39.092	36.5894	88.3582	86.5601	97.3501	55.7106	51.2444	72.3765	52.733	55.8265	40.5314	515.866	500.556	490.758	106.891	89.6149	124.122	63.1536	100.772	70.8758	78.9185	95.6177	86.3201
112.0140489_636.0600982___19	82.6877	105.233	42.41	48.3955	48.3361	59.5294	108.631	86.4192	68.3094	56.1566	52.9753	73.9283	17.8588	44.8428	20.7837	65.3831	41.421	57.0318	36.1482	44.6428	29.1486	29.9558	28.0241	25.5302	195.404	279.351	273.47	53.8449	51.9846	68.4815	41.507	46.2858	80.3992	79.4062	51.4551	67.803
112.0142733_430.302242___3848	92.4933	82.4893	144.415	286.011	789.612	325.208	499.222	546.735	436.961	415.205	384.906	394.762	30.3472	39.09	38.6957	628.061	547.886	516.778	122.166	112.983	154.349	43.4081	55.5685	40.3933	107.81	185.934	169.952	198.768	148.952	267.164	154.303	176.613	167.456	71.6762	78.355	85.9656
112.0144385_589.7880364___7636	24.3297	64.1554	30.8172	636.48	1155.46	815.069	193.18	104.736	139.676	103.537	150.377	116.226	20.3261	28.7845	27.6001	53.4759	45.5604	31.607	31.9235	21.0129	37.3117	18.3173	40.5952	37.9633	74.1292	75.0666	111.124	56.3131	27.2112	71.9463	47.5577	63.3902	58.0132	44.6321	37.5392	41.7515
112.0145592_403.1362426___1	97.3396	105.401	81.0334	562.341	756.564	551.917	903.768	412.471	950.419	886.875	780.278	670.796	47.984	57.2374	66.6513	421.65	373.86	337.044	126.258	117.254	137.202	78.5105	94.5617	84.1621	167.701	193.674	157.415	148.615	140.901	244.151	200.599	183.632	188.37	109.439	139.675	117.82
112.0102134_128.6102934___8082	19.5814	36.821	11.6272	1576.33	1636.38	1931.85	2882.86	2642.63	2576.64	2467.57	2719.62	2645.4	149.078	0.0238966	0.0209605	2160.71	2265.34	1642.3	1524.61	1701.46	1365.39	1375.09	830.686	1233.88	39.8822	74.3392	54.2805	1394.18	1586.89	2780.69	1869.9	2766.42	2542.24	1546.6	1051.94	1618.46
112.0860765_298.2336139___3405	14.6173	119.323	30.8934	13.2915	4.40277	24.558	23.2898	10.8477	16.0672	12.0465	3.7866	17.4676	10.1148	7.83261	11.4056	107.002	10.8069	6.80484	5.9758	0.0213417	2.06458	9.17973	10.1567	10.1284	159.756	296.442	22.2053	187.164	13.5723	174.104	9.53716	34.6825	5.92839	229.414	61.6408	3.19464
112.0988621_438.5726916___1199	58.4653	55.0534	30.8782	77.382	96.7622	137.745	62.1674	81.3368	84.4019	64.1053	53.1149	52.331	17.7261	15.5792	22.7948	33.826	54.0008	38.4086	19.8755	20.9386	24.4051	9.14957	10.129	10.1168	27.7807	29.9272	37.8173	25.1962	27.0989	44.1694	22.0688	34.4333	32.356	20.4994	23.877	19.1476
112.1760805_128.2684775___8083	0.044486	0.0417716	3.86965	57.643	271.834	43.0421	126.944	95.6844	72.5214	168.26	149.855	26.2174	0.0232039	0.0238966	0.0209605	0.0221872	0.0198348	140.486	0.0182778	125.107	0.0189364	244.457	0.0232272	134.562	12.2715	0.0274813	6.26966	60.8037	77.5673	0.0253439	104.536	156.292	141.266	95.1123	84.7207	0.0293344
112.1926429_370.3778833___673	19.4179	4.57048	23.0405	4.40619	4.38251	10.4878	3.86838	7.18863	11.9967	8.0674	15.0909	13.0356	15.277	13.0944	11.4763	4.87608	8.68939	11.3724	12.0024	14.0491	4.14763	4.61261	5.10283	20.3703	189.513	198.074	144.633	25.4472	24.5629	47.277	22.2735	31.8511	20.7873	3.44964	24.0728	19.2912
112.2562063_366.0555817___674	4.9327	18.5847	7.80039	22.3656	8.90678	14.2092	3.93014	10.9555	12.1821	12.1528	3.83514	13.2325	15.1531	12.9791	2.27632	7.24182	15.0658	15.7899	7.92717	9.28579	8.22316	9.13528	0.0232272	7.57548	193.282	165.18	223.683	19.6247	18.9447	38.6171	15.7719	8.61373	14.7275	20.4905	23.8688	15.9406
112.3571905_128.0249727___8084	0.044486	0.0417716	3.88357	53.3402	17.6658	42.3036	67.3261	25.3391	64.5985	72.5476	136.338	13.1672	0.0232039	0.0238966	0.0209605	131.95	0.0198348	236.363	296.02	0.0213417	0.0189364	0.0210019	2.51236	0.0232341	6.1426	5.95353	9.60183	25.7184	69.9846	99.5489	35.2448	59.6273	71.8389	64.7183	27.709	57.2164
112.4951551_737.0238768___4080	0.044486	13.8937	11.8345	8.92929	31.2303	7.08465	35.4704	137.595	97.016	36.5874	19.097	13.292	10.2573	21.4109	7.02591	7.38706	11.0421	2.30095	6.08164	4.714	12.586	32.5731	23.1561	25.8231	12.3561	11.8787	9.40241	19.6409	35.3094	49.8189	143.093	25.996	144.979	268.982	113.026	171.493
112.6530165_128.5994979___8085	0.044486	0.0417716	0.0352303	66.8098	35.3317	38.77	60.7827	75.183	36.3366	36.2738	45.7492	446.964	0.0232039	0.0238966	116.461	0.0221872	0.0198348	241.752	0.0182778	0.0213417	112.665	0.0210019	127.976	0.0232341	0.0283566	0.0274813	3.1427	41.8687	24.2793	71.2771	77.8023	86.3556	51.314	23.8258	27.2107	57.259
112.6956054_369.2637054___675	14.7343	0.0417716	11.6657	4.46128	8.86889	31.8374	7.82749	18.1774	0.0365954	16.1542	11.4519	4.39909	10.202	7.86423	11.4944	14.6247	8.69611	2.27771	8.0013	4.68874	6.22879	9.22447	5.10788	2.54985	81.7676	121.097	116.228	16.987	19.133	25.0639	6.36459	17.3761	14.8495	3.44903	10.3302	16.0975
112.7349376_737.0331888___4081	9.81832	9.26246	7.88969	4.46464	26.7689	17.7722	108.854	82.8082	85.3574	12.2199	11.4837	0.0396846	5.12867	13.3818	14.0518	7.39731	4.41682	9.21567	6.08164	4.72041	2.09767	18.6132	18.6987	38.7347	9.26707	5.93935	6.26828	14.0292	19.0128	70.0784	120.195	116.544	111.754	241.401	141.238	253.799
112.8038356_128.1772224___8086	0.044486	9.24551	3.89206	31.1653	26.5619	31.7843	50.8617	70.9048	36.422	12.116	53.4857	30.7132	0.0232039	0.0238966	230.196	0.0221872	255.416	0.0207037	0.0182778	0.0213417	0.0189364	239.058	0.0232272	0.0232341	3.07459	2.97639	6.27603	50.2425	35.107	108.163	37.7046	71.6277	14.6934	40.8755	13.5874	38.1247
112.9877578_632.5866667__[M+Cl]- 78.0183 [M-H]- 113.995_19	473.917	300.45	524.741	1305	1031.33	1011.87	712.025	849.246	988.802	884.584	696.927	958.124	837.852	674.067	644.679	1925.65	1611.21	1642.23	1101.52	801.86	867.354	679.31	827.058	881.02	768.462	1248.37	645.385	3266.44	2491.33	3273.81	1892.48	2327.23	1896.79	891.969	527.034	608.662
112.9876675_989.1228542___3810	262.146	660.251	598.187	660.697	689.404	598.544	437.232	543.776	401.291	638.295	625.14	430.45	1417.83	1240.99	1592.21	1810.14	1545.33	1811.09	2062.44	869.759	1864.04	1477.44	1486.01	2168.25	1045.01	1291.95	801.724	971.529	1134.15	1063.05	1043.29	983.281	1321.91	1025.17	929.161	858.408
112.987634_671.1938404__[M-H]- 113.998_5	456.123	461.335	238.911	846.846	482.851	668.137	335.756	503.108	514.017	159.667	90.292	134.718	231.237	240.151	155.199	589.81	614.834	610.395	318.855	335.21	462.872	225.125	330.61	335.115	552.56	497.194	526.841	764.714	558.805	1082.64	366.215	678.994	481.936	242.261	247.871	144.119
112.9875797_781.0227404___3124	123.598	295.434	248.672	219.335	324.403	242.152	619.639	542.566	430.782	265.338	408.34	561.168	465.409	701.221	532.474	979.12	588.752	738.678	454.487	749.966	781.887	1577.74	1852.02	1646.91	582.928	636.302	522.372	655.416	537.997	831.886	1140.15	813.333	872.612	1896.85	3159.9	1095.74
112.9875265_738.4975256___62	210.604	324.182	328.338	483.138	527.494	501.073	911.213	274.652	755.221	451.971	429.449	472.684	804.764	769.448	727.697	1007.86	698.142	915.477	513.417	619.478	698.14	875.123	1019.4	1157.05	707.05	651.941	644.891	924.716	695.275	986.095	1003.91	82.2128	1133.62	1520.99	1238.48	1100.41
112.9875867_1107.420677__[3M-2H+K]- 25.3425_14	1030.75	1118.9	1011.16	1136.7	1179.8	994.522	1101.76	1027.83	975.339	1097.29	1350.03	1032.82	4676.99	2393.37	3577.25	2926.95	3323.05	3425.53	2733.54	3464.56	2871.3	2950.82	2741.01	3366.17	2006.97	1999.48	1958.55	1873.89	1647.98	1720.45	1984.04	1710.95	2199.23	2767.53	1803.36	1648.65
113.0221918_131.9960789___8289	279.811	287.729	343.206	535.41	1037.1	923.236	1323.9	693.125	1017.63	1508.35	1290.42	1284.92	452.206	535.681	0.0209605	1173.72	704.524	840.881	1575.94	568.881	1609.89	1310.61	2478.27	2037.82	359.085	508.879	439.479	1021.47	670.702	1988.97	980.16	1394.11	1486.98	2227.12	1403.34	2043.72
113.0261984_368.6864525__[M-H]- 114.035_4	410.744	523.364	565.271	593.237	732.897	619.777	816.39	654.301	717.344	1391.43	1503.37	1342.53	530.329	615.847	949.26	578.435	834.155	764.228	937.082	910.463	1106.9	1127.86	1327.49	1193.48	1052.29	1078.1	1055.83	1062.66	835.22	1352.6	1214.54	1361.97	1285.61	1477.25	1071.63	691.262
113.0262721_451.2416062___9586	214.12	300.23	284.326	334.925	488.87	411.8	426.361	416.727	368.137	763.657	778.816	557.484	171.391	206.553	180.901	239.262	329.041	255.982	421.407	307.241	293.561	522.937	738.738	537.834	359.658	342.514	362.503	338.794	337.07	687.857	581.712	754.241	536.686	1080.58	851.816	1240.41
113.0262724_332.4585956___44	401.722	495.467	491.411	444.325	454.463	434.903	627.128	623.391	518.439	888.373	845.813	795.66	902.404	1197.73	499.213	460.852	470.863	427.692	465.897	571.938	590.043	472.927	676.327	602.424	447.017	532.911	444.851	478.917	460.555	707.537	653.22	818.73	751.547	1084.91	850.752	1002.13
113.0270315_508.1401546___18	247.23	304.286	219.506	243.33	209.955	255.618	205.792	208.393	257.527	348.144	323.457	274.384	174.133	217.039	214.948	236.128	294.135	269.351	221.578	247.213	276.023	229.651	264.382	288.521	224.224	207.158	176.944	287.68	233.174	356.744	304.589	388.899	277.594	443.966	318.699	312.259
113.0264016_560.3529614__[M-H]- 114.034_20	319.473	386.366	262.868	556.162	739.058	698.054	471.662	497.364	455.53	845.508	889.167	778.836	134.968	160.777	193.318	233.141	237.795	194.848	307.199	346.19	253.419	300.938	327.246	323.773	192.091	273.19	274.26	385.749	359.69	497.886	370.908	482.839	447.394	519.125	798.601	429.948
113.0267107_234.3168039___6633	627.933	814.975	827.707	525.134	752.406	697.813	503.062	566.98	531.641	418.916	501.429	461.925	243.72	243.624	310.673	261.299	276.466	248.34	325.363	403.157	434.962	489.33	459.546	503.581	316.469	422.903	371.682	311.914	270.051	449.801	370.956	412.03	322.889	462.889	390.235	419.276
113.0262664_170.3695006___189	144.912	260.354	188.567	308.986	358.103	253.254	420.215	374.763	344.525	586.234	444.584	389.369	157.637	159.121	148.339	418.924	326.369	350.345	506.727	562.964	530.036	460.165	691.341	562.561	336.445	351.278	357.239	382.767	334.037	550.208	460.632	539.635	436.873	698.46	536.024	571.383
113.0620236_292.7995418___5925	59.2811	36.6928	46.307	115.19	129.225	112.975	150.536	126.505	187.359	241.483	208.727	136.486	80.8621	68.5916	111.885	202.612	166.022	270.653	157.071	170.404	449.957	186.638	259.124	229.687	69.1442	126.04	88.4662	117.241	102.013	229.904	161.487	202.745	168.926	206.456	195.465	222.223
113.0266731_259.7314335__[M+Cl]- 78.057 [M-H]- 114.034_63	2269.44	2237.06	2222.55	1724.49	2132.28	1758.27	1410.26	1325.48	1253.65	965.864	878.568	852.937	212.414	226.085	246.957	324.6	349.023	282.036	285.179	390.127	432.787	497.77	473.064	595.583	360.997	338.75	371.951	381.05	357.616	582.976	495.82	572.033	478.086	1308.27	449.602	493.374
113.0629387_425.4179907__[M-H]- 114.07_13	73.1978	82.6865	58.0505	79.7786	48.5058	73.9421	35.0639	57.6944	44.3308	56.1788	49.4921	34.8811	146.113	158.993	98.581	86.0168	41.0969	54.3553	49.006	66.1994	56.0664	64.2757	89.9634	80.064	92.6805	95.97	104.172	78.6539	88.0271	66.4086	69.5236	99.6033	29.482	79.1125	68.5194	60.759
113.1764492_367.9127732___676	4.91811	4.63056	11.6835	4.47325	17.761	10.6262	15.6751	7.28188	0.0365954	16.1982	3.82306	0.0396846	12.7695	5.24951	9.20769	12.2037	8.70718	2.28155	4.00661	4.69515	10.3948	2.30909	5.11443	5.10647	56.2676	82.8303	45.2241	5.66998	10.9475	13.9431	12.7771	11.6109	17.8956	27.6282	13.8127	16.1199
113.2213445_736.9313867___4082	0.044486	9.24559	3.93684	0.0402612	13.3596	3.54232	35.3426	11.0119	24.6542	12.1958	22.9214	8.84302	10.2449	5.34529	2.33937	7.38706	11.0253	4.6017	4.04923	2.35699	2.09494	9.29335	15.4152	15.4743	15.4202	5.93431	9.38636	14.0068	2.71211	24.8796	37.732	57.8552	39.2279	97.3617	23.9016	46.8225
113.2804239_128.5198053___8087	0.044486	0.0417716	0.0352303	22.2699	39.8382	24.7281	27.3928	18.0994	40.374	20.1987	30.5703	26.3344	0.0232039	2.5887	0.0209605	148.897	132.393	152.822	0.0182778	0.0213417	0.0189364	115.956	10.0653	0.0232341	0.0283566	0.0274813	3.1427	16.7678	21.6071	35.704	31.4559	34.3644	29.4032	10.2235	3.40134	22.2674
113.3180438_436.8064764___9	345.983	219.87	307.922	44.4436	39.6166	52.7541	31.123	14.4089	28.1716	12.0493	26.5951	13.0986	5.07091	2.59977	9.14422	12.1275	10.8029	6.79509	1.99239	4.67071	4.13507	6.88817	10.1545	7.60728	18.5706	20.9682	22.113	5.61358	10.8512	19.3481	6.32006	8.62767	8.84385	13.7005	3.41986	6.39017
113.4783654_729.5203127___7580	0.044486	9.10594	3.87461	0.0402612	13.1587	20.9027	3.86753	25.3108	20.2178	8.00792	7.52201	17.4108	17.9319	10.8125	7.12095	17.4493	2.20496	6.98706	6.07257	4.77473	6.28141	0.0210019	5.14131	12.8898	15.2215	20.8169	9.25963	16.6047	24.3807	30.3841	6.20385	25.6009	20.3958	40.295	16.8256	25.45
113.5651853_436.5242661___9	222.981	230.635	298.164	22.1909	35.269	52.8293	7.79138	21.6134	24.1471	28.0759	15.2225	21.831	12.6942	15.6191	4.57211	7.37101	6.49055	4.53006	6.05486	14.194	4.1891	6.97789	7.71558	12.6788	12.364	24.001	12.636	33.6815	19.0154	11.0708	18.9602	14.3795	11.7918	10.2754	3.41986	19.1705
113.7219238_726.4305495___186	9.70076	9.13647	11.6706	8.81828	8.80555	0.0319682	15.5234	3.62676	8.10895	4.01362	3.76461	4.3705	2.56833	10.7041	9.40533	9.87591	4.41846	4.60574	0.0182778	9.44523	0.0189364	4.66012	2.57764	2.5849	9.164	12.137	6.19333	13.9073	11.0397	2.81532	12.4599	8.56137	11.7193	10.1333	33.7795	22.7109
113.8142629_436.037368___9	80.6075	177.24	158.59	22.1909	39.5687	31.6556	7.77107	14.3915	28.1384	16.0434	22.7685	13.0986	15.4036	15.7969	9.26182	24.57	13.1261	9.1807	2.01829	4.73135	4.1891	0.0210019	5.14372	7.70896	15.455	12.1325	9.47699	5.61358	2.74705	16.792	3.16003	14.3795	2.94795	17.1256	3.41986	6.47022
113.9396884_129.5351426___8088	44.249	23.1191	19.4619	40.0859	287.721	52.9888	54.7856	32.656	24.2806	43.5059	30.5703	235.01	25.0989	211.56	0.0209605	202.396	142.61	31.3811	0.0182778	482.147	401.868	58.8966	20.1307	170.441	18.45	8.93987	9.42809	19.5624	29.7097	32.9575	37.7471	34.3644	38.2242	34.0784	30.6121	19.0863
113.9625195_727.1940591___9327	9.68786	18.5112	31.0664	4.40303	17.8404	17.7154	31.4449	0.0328174	0.0365954	8.02724	11.2938	8.72783	7.69247	29.3902	4.6958	9.86045	15.4432	11.4984	8.10556	7.07432	12.5774	25.5967	12.8707	12.9064	9.164	12.1177	15.4833	22.5519	13.7717	19.6666	12.6241	5.77991	5.9383	20.5312	10.2618	3.23775
114.011737_1093.128472___24	10598.6	9306.48	11029.7	8899.78	11205.7	8940.45	11074.9	7691.74	7589.01	9264.48	8113.42	9419.01	392.907	206.521	400.542	278.827	336.534	441.604	127.356	121.989	119.525	395.483	393.155	366.657	4267.91	5092.59	2973.41	2660.33	3942.05	4430.65	3831.25	2075.16	3347.69	3965.7	3951.17	3441.39
114.0555643_135.7459285___6803	164.9	155.282	135.211	115.812	179.079	125.933	142.855	108.825	117.171	109.785	211.53	242.432	141.928	0.0238966	0.0209605	0.0221872	0.0198348	252.995	0.0182778	129.406	0.0189364	0.0210019	213.293	318.018	168.946	219.226	226.931	131.803	114.299	182.581	126.049	181.565	167.506	310.994	198.97	227.094
114.057052_330.7257817___44	141.354	161.107	115.676	48.6655	52.7204	42.1381	62.1022	54.1165	68.903	60.0491	75.8667	30.5294	73.2859	107.042	88.5534	16.9415	36.5929	31.6604	15.873	20.9256	20.5815	192.266	197.554	246.38	194.241	264.617	255.635	58.9053	78.4365	71.7422	88.5497	80.5601	58.9424	213.782	139.837	162.653
114.0569014_396.1478395__[2M+Cl]- 39.5354 [M-H]- 115.059_1	389.95	374.809	290.834	61.9312	118.646	77.1233	62.0322	104.836	58.3326	97.1838	26.4656	74.1035	113.515	115.084	97.7122	21.7514	27.99	36.0908	13.8714	20.8958	20.563	50.3273	25.2991	37.8472	408.423	513.561	392.551	49.6573	62.2291	77.0396	53.5482	69.9973	26.4749	123.037	74.8825	79.5078
114.0577604_288.0077848___2954	63.4989	73.4763	73.2895	44.4112	13.2104	35.1579	85.5242	43.3713	57.4585	48.2624	45.5459	43.7277	111.333	177.386	116.945	31.5509	19.4509	22.671	19.8799	18.614	22.6729	270.219	279.14	371.936	235.141	298.68	310.635	50.9826	54.711	58.3397	76.8982	134.9	89.5534	248.131	164.087	277.689
114.0290355_374.6854096___8	68.1643	68.8425	111.922	88.5543	110.046	108.699	104.736	75.7963	68.3105	132.121	113.522	87.3491	45.5291	44.2366	47.9124	72.5079	56.124	40.6871	54.4537	62.7274	57.7025	80.1394	93.9996	88.524	123.501	140.302	98.3804	67.3373	84.6834	110.512	115.708	106.311	94.3328	147.045	75.0565	86.3006
114.2002194_124.0319948___7326	4.86243	0.0417716	3.85077	0.0402612	235.94	6.9849	7.74288	7.17406	12.006	0.0365366	11.3309	4.33982	2.53368	0.0238966	0.0209605	4.85228	0.0198348	121.848	103.691	242.238	106.974	4.58881	2.5388	134.562	0.0283566	6.00706	0.0290008	8.45663	10.8933	13.8438	12.6807	20.2169	11.8578	24.0361	6.85597	9.61898
114.2895626_337.4418682___4877	4.87799	13.7764	0.0352303	0.0402612	13.2139	17.5785	0.0353867	7.23094	4.02858	0.0365366	3.79687	0.0396846	100.717	92.7711	107.569	34.4842	53.1425	32.1939	2.0186	7.09037	8.37043	9.3067	5.16189	10.284	9.41693	12.1923	9.63333	5.70472	5.50933	22.4606	12.8649	0.0264366	5.99558	10.4373	0.0313307	16.21
114.3485854_633.6424962___1948	4.85837	9.15528	11.5689	30.7818	8.78619	17.5047	38.7749	18.0058	27.8366	40.0075	7.56821	4.34807	10.1787	5.26809	11.5465	17.0836	19.4752	11.3966	10.0377	7.04747	10.3941	2.30031	7.63063	15.3174	15.5274	21.1904	19.0323	49.5644	57.1154	91.5483	84.8087	123.112	91.156	0.0314148	13.7174	9.68304
114.5400709_337.4274109___4878	0.044486	4.59782	3.87154	8.88446	8.80929	14.0818	15.5787	0.0328174	12.0857	12.054	7.60431	17.5085	62.61	94.6713	81.4043	4.85828	40.0088	41.8688	7.97073	6.99927	10.3306	6.88975	12.8797	7.71298	9.43564	9.14424	28.9576	8.57425	13.7733	14.066	9.66812	8.79472	18.0233	17.4303	3.47453	9.74532
114.5954859_633.6176885___1949	9.74195	4.58439	11.585	44.029	21.9958	24.5394	38.8383	28.8489	36.2109	28.0768	22.7347	30.4776	5.10523	10.5501	9.25014	12.2199	16.664	20.5387	6.04088	11.7627	6.24494	2.30613	20.3984	7.6695	12.0351	24.248	22.4665	70.8528	108.969	84.9322	77.6835	73.4826	125.415	20.7333	6.86771	9.69838
114.7882196_337.4292213___4879	0.044486	13.7935	3.87154	4.44223	8.82113	10.5614	11.6841	3.62039	8.06819	12.054	0.034555	4.37711	59.026	60.7352	70.099	19.4331	43.7254	18.4338	1.99268	13.9985	2.06613	6.88975	5.09288	5.07559	12.5809	15.2404	19.305	2.85808	11.0187	16.8791	0.0290452	8.79472	6.00776	6.97213	10.4236	12.9938
114.777072_493.0532987___4011	58.3215	18.3742	42.341	153.788	109.735	55.111	45.5852	25.3173	67.3757	11.9781	30.2426	8.69351	7.58737	2.59765	11.4017	4.82356	12.9409	2.25119	15.8723	4.63903	2.05711	2.28072	5.04738	2.52504	18.4974	17.9413	18.9035	8.39631	2.70703	5.52114	3.14158	11.4553	11.7493	3.41371	3.3964	9.55252
114.7948857_382.6288527___12	126.309	146.453	168.425	31.0593	17.6521	17.6089	11.6894	21.7258	12.0776	20.0612	11.4022	8.75063	10.1205	13.026	11.4182	7.28368	2.16247	6.78761	5.9729	2.33286	4.12733	0.0210019	7.62037	2.53235	9.26854	20.9499	28.4561	8.43819	10.8652	13.8185	12.6579	28.7949	8.85988	34.3236	10.2563	15.9777
114.8314336_633.6424962___1950	4.86437	13.7329	3.85631	26.3844	26.3949	7.01126	3.88382	31.5449	20.1172	28.0418	15.1564	8.69614	5.09695	5.26809	13.8752	23.5175	13.0729	11.3966	16.0603	4.69831	12.4899	4.6065	7.64003	12.7645	12.422	3.02721	22.2354	120.653	63.9109	108.155	117.873	87.9293	78.1029	13.8222	17.1467	6.46559
114.937314_982.3251535__[M+Cl]- 79.9637_21	2472.03	2758.07	2556.03	1842.49	2952.31	2501.11	2182.76	2383.12	2478.69	2935.27	2388.08	1963.77	1659.39	1388.62	1631.97	1584.03	1581.3	964.916	1379.11	1120.48	957.208	1214.41	1231.3	1255.48	1800.49	1644.47	1684.19	1688.43	2345.54	2206.07	1278.38	1354.15	1570.18	1393.59	1391.45	2176.81
114.9367608_1053.732561___3289	5852.45	6150.61	4845.34	5036.27	5615.26	4264.44	5131	3091.45	4655.18	6167.16	5452.09	5007.47	6047.82	6616.43	5018.15	5981.07	2990.48	5251.05	4882.87	6116.67	2805.78	5300.23	6432.49	5501.14	2211.57	4341.62	5442.53	4264.9	3744.35	3685.38	4791.94	5008.48	4789.89	5393.76	5483.95	2430.61
114.9450939_126.8349723___8033	72.4921	70.4808	99.5098	134.256	134.893	116.099	126.954	65.6386	81.3903	174.5	169.974	124.098	501.895	346.954	550.511	362.897	367.648	629.312	456.446	0.0213417	0.0189364	806.305	568.744	0.0232341	115.73	77.6224	94.3474	72.835	64.9342	63.2999	56.6527	63.1332	53.9685	112.667	115.817	70.114
114.9904072_1126.373613___68	140.083	189.563	50.6046	106.51	133.408	77.972	151.928	75.2355	95.2058	153.465	87.4516	96.7874	197.267	409.42	339.079	243.282	366.216	109.846	287.474	118.958	130.336	155.075	167.382	190.299	123.863	148.794	125.133	132.909	99.3907	104.37	140.924	151.361	140.298	179.955	96.9482	139.771
115.0054326_306.3590281__[M+Cl]- 80.0406 [M-H]- 116.013 [M-H-H20]- 134.025_15	2830.41	2947.35	2300.38	481.394	599.643	538.04	264.944	281.306	243.071	198.477	229.301	197.963	1176.39	1518.33	1502.38	466.056	625.077	523.917	331.497	282.138	316.278	182.746	215.854	203.169	2271.81	2262.7	2355.32	505.161	413.384	677.88	254.162	361.559	298.274	376.589	184.712	234.431
115.0021226_130.352517___8290	203.307	331.299	249.994	113.594	502.113	265.885	222.104	325.287	266.079	322.514	383.769	857.808	0.0232039	0.0238966	0.0209605	0.0221872	0.0198348	0.0207037	0.0182778	326.402	0.0189364	0.0210019	0.0232272	387.358	0.0283566	688.434	619.417	266.841	258.528	565.224	347.031	584.346	345.318	656.854	334.773	496.742
115.0051157_364.7781411___26	482.727	480.429	492.606	255.77	539.428	289.29	231.878	176.721	134.431	200.482	198.184	154.877	111.364	156.426	206.529	168.82	312.731	251.252	92.1005	103.094	117.964	114.364	156.936	83.6718	287.542	672.885	282.803	263.02	208.343	485.698	270.77	210.307	381.173	186.909	122.883	156.561
115.0047813_407.1467405___7904	73.1905	151.825	120.079	111.01	123.398	101.984	124.492	68.6714	84.7051	84.104	87.3289	96.1646	94.0893	103.463	102.748	84.8295	65.696	85.9945	74.0482	27.9598	57.8382	58.9718	72.9772	73.5501	671.673	718.027	627.782	193.517	123.301	209.822	113.728	155.304	175.924	106.298	122.908	159.196
115.0049072_499.1437609__[M-H-C2H4]- 144.052_48	181.692	189.974	187.078	209.829	215.293	98.861	155.965	138.835	122.162	149.097	112.581	113.944	51.1185	77.1482	69.0296	53.5953	65.0626	45.4966	57.9553	58.56	47.7997	55.2916	45.8671	40.7683	409.261	470.214	384.294	149.806	142.058	194.793	152.339	188.758	181.007	134.236	72.0563	128.596
115.0314436_1092.866577___24	12859.7	12949.4	18114.5	9717.71	13692.7	15149.9	15263.3	9328.62	10879	13194.8	13388.9	11989.7	59.5309	60.527	150.8	166.708	27.0786	179.996	53.7887	112.952	82.794	139.259	297.726	221.18	4544.31	6297.68	6969.97	3712.92	5095.96	5742.76	7421.43	3859.1	5203.65	7389.17	6263.53	5601.5
115.0052566_267.2981482___3467	692.161	867.704	674.159	209.671	238.802	208.482	156.262	124.182	111.484	84.9773	141.078	103.274	873.997	835.575	762.255	187.802	177.653	183.856	69.9052	86.5541	81.5072	108.016	59.9884	89.859	753.137	1071.73	924.177	175.092	140.652	208.186	139.028	176.289	197.174	132.387	132.308	182.014
115.0781137_638.0012684___6337	48.7866	109.938	42.5274	35.2891	57.2999	45.6572	62.2634	30.5076	40.3119	40.1836	34.1597	43.6183	18.0141	66.0534	64.1013	118.26	52.4009	27.467	24.1312	28.2367	35.457	18.488	17.8837	43.481	244.702	367.861	50.9556	229.374	65.7408	74.0548	84.5032	107.937	80.7441	156.215	64.8005	48.5132
115.0773705_609.506755___8743	24.2661	73.1338	34.637	4.39652	43.7997	31.4484	46.3798	28.7045	23.988	27.9011	22.6588	30.3442	18.0635	45.2114	23.3417	83.9765	36.2893	27.6156	34.4733	11.886	21.058	16.2957	36.1014	33.4762	171.073	228.615	31.7025	110.135	19.3718	98.5922	22.2545	8.66923	41.6077	157.872	85.7041	45.1429
115.1762137_701.5829516___6269	14.5375	4.57027	3.87381	4.40025	17.5904	0.0319682	7.7637	7.24405	4.0469	12.0229	3.76913	4.36052	2.56406	2.66401	4.68723	4.92122	8.82505	9.19158	0.0182778	11.7754	2.09508	9.30805	2.57315	2.582	12.2472	17.9873	6.18135	2.79226	2.72413	5.55147	15.6671	22.7936	11.7221	10.0887	16.8517	16.0386
115.2646188_490.2232698___4558	24.4494	32.2922	15.5063	81.7003	191.786	99.4053	58.1067	117.751	84.3565	12.0373	34.2434	21.8434	17.7669	10.43	16.0159	9.69014	19.4869	11.3182	7.9691	11.6615	4.1371	4.58054	17.7513	17.7528	15.4753	33.0134	15.807	11.2414	13.587	16.6302	12.623	14.378	2.9491	3.42826	10.2339	12.8006
115.4195295_702.2359712___6270	9.69166	0.0417716	3.87381	13.2007	4.3976	17.5033	0.0353867	0.0328174	4.0469	0.0365366	7.53827	8.72103	2.56406	0.0238966	2.34361	9.84243	4.41253	0.0207037	2.02778	2.35508	4.19017	11.6351	5.14631	5.164	12.2472	20.9851	15.4534	8.37679	0.0249155	0.0253439	9.40026	0.0264366	0.0271353	13.4516	3.37035	16.0386
115.4397451_1073.656261___41	98.5934	152.72	93.3205	111.597	121.571	89.1195	89.8164	79.5193	100.918	117.093	76.7016	79.9332	85.2035	75.5687	85.344	43.6817	47.7712	18.0558	34.004	37.3629	33.1752	16.0657	25.3966	25.2912	92.4488	69.574	48.3614	66.0908	60.3257	94.6347	71.4818	61.5204	90.6477	70.1567	66.0979	102.501
115.5059082_491.660886___4559	9.79457	9.24621	27.1391	73.9673	119.493	70.4596	42.9941	81.5972	48.7283	28.1199	15.2309	8.75457	10.1784	10.4569	13.7608	19.4185	4.34018	11.331	10.0777	16.3421	0.0189364	20.6561	7.6223	2.53909	18.5907	36.098	9.50499	14.0819	8.17266	11.1098	6.32383	14.4053	14.7796	3.43535	3.41874	19.2252
115.9222735_1090.562188__[3M-H+Cl]2- 65.9633_24	312.669	701.673	661.613	567.956	455.471	369.045	578.749	310.303	239.44	557.156	474.058	344.393	1408.49	2744.63	2299.53	2403.42	2242.82	1228.94	1709.8	1550.56	1251.14	1177.24	1223.03	1271.49	519.476	801.25	522.52	920.427	697.312	668.696	1009.68	592.94	649.717	1715.92	1177.56	1817.62
116.0272762_1094.249848___24	19262.2	19354.7	13320.7	17329.2	19107	25879.3	16130.7	14198.9	16884.6	18868	17034.7	18815	277.817	262.052	473.542	340.614	205.018	364.258	169.188	204.176	320.664	384.904	553.084	409.513	9957.43	13834.5	6610.68	6078.88	7822.71	12487.6	5774.41	5154.03	8961.32	11007.1	8252.19	9727.69
116.0523858_250.1200344___8391	392.258	615.462	523.174	1169.17	1712.44	1361.46	1095.26	1141.08	1076.71	995.404	1156.43	1099.08	889.047	975.83	802.304	538.094	522.173	597.674	438.612	431.99	446.557	1259.67	1621.09	1545.95	1147.89	1336.44	1066.58	1019.08	960.117	1596.12	2035.22	2448.76	2064.15	1111.28	684.799	964.171
116.0524982_308.8066263___1647	29.2529	9.17528	23.1605	30.9829	30.7979	21.0607	75.1899	65.9469	84.3937	441.766	405.418	276.17	22.7656	13.0511	18.2627	36.1159	36.9875	43.0344	50.8813	53.7522	37.1168	150.547	176.353	205.525	37.0351	29.8855	37.9179	30.8864	32.47	22.0584	98.0917	112.518	143.128	299.547	214.592	260.206
116.1818127_123.9005351___7327	4.86243	4.56922	0.0352303	0.0402612	8.75462	6.9849	3.87144	10.7638	15.9698	0.0365366	15.1078	4.33982	129.256	2.61306	0.0209605	126.336	0.0198348	2.26183	0.0182778	0.0213417	0.0189364	128.191	5.0776	128.449	0.0283566	3.00353	0.0290008	8.45663	8.16998	0.0253439	3.17017	2.88813	5.92891	24.0361	3.42799	0.0293344
116.2415138_457.2765786___2421	14.6166	13.7672	7.73913	13.2952	66.1002	35.2054	31.1022	17.974	24.0879	4.00136	15.1867	4.35986	10.2551	5.26241	16.1817	0.0221872	6.54944	4.58216	8.06555	2.35966	0.0189364	9.27711	2.56814	7.6877	9.38813	3.02779	15.9999	2.83803	5.47825	8.38159	6.39804	14.5625	2.983	6.92663	6.91093	6.45129
116.3878749_128.5207954___8089	0.044486	0.0417716	3.89238	0.0402612	8.85294	14.1304	7.82652	0.0328174	4.0374	8.07949	7.64259	4.38907	0.0232039	0.0238966	0.0209605	131.05	113.757	120.9	0.0182778	0.0213417	0.0189364	2.27365	2.51633	0.0232341	9.22498	5.95991	6.28539	8.3839	2.70089	16.4788	3.14559	8.5911	2.94032	13.6314	3.40134	6.36212
116.745106_124.3078785___7328	0.044486	4.55965	3.84174	13.1771	8.73446	3.48306	3.86207	0.0328174	7.96873	3.98758	7.52067	8.65894	133.451	0.0238966	0.0209605	0.0221872	0.0198348	0.0207037	0.0182778	0.0213417	0.0189364	4.57824	131.647	0.0232341	0.0283566	2.99651	3.16097	2.81206	8.15083	13.8119	9.48858	2.88014	14.7881	3.42567	3.41967	15.994
116.8091602_633.6177383___1951	14.6129	9.15528	15.4253	594.08	396.095	390.908	240.505	559.604	773.412	188.118	257.61	296.431	20.4209	2.63753	11.5627	380.967	241.683	464.876	8.03016	2.34916	31.2247	9.22451	28.0478	5.10582	34.1604	9.08162	21.1385	1299.16	1069.05	2358.52	618.732	1318.83	478.345	24.1889	3.42935	12.9107
116.9203461_123.7558112___120	623.157	949.112	681.296	397.579	1467.63	201.057	701.177	470.258	585.727	435.03	649.166	1176.98	0.0232039	0.0238966	0.0209605	0.0221872	0.0198348	0.0207037	0.0182778	0.0213417	0.0189364	233.49	632.416	9786.73	0.0283566	0.0274813	0.0290008	0.0257658	0.0249155	0.0253439	0.0290452	0.0264366	0.0271353	0.0314148	0.0313307	0.0293344
116.9114673_172.1720455___9351	4.90542	9.20024	7.7515	8.91012	17.6596	48.7033	7.80509	43.6576	8.03813	76.6677	3.80895	52.066	509.034	133.479	6.84222	734.598	14.3005	3.28959	8.6477	14.0005	1279.2	16.1328	1980.12	1863.5	51.8744	66.8911	38.6283	91.4524	76.2332	149.21	45.2263	67.4989	45.1936	48.6962	20.8857	58.4361
116.9304664_1051.565221___3298	41234.7	46700	35778.6	40730.8	42417.6	35956.2	38710.3	37885.6	36005	41700.7	39004.6	38925.2	95884.8	96348.7	71457	91111.4	60767	75735.9	70150.7	91301.2	75345.5	67371.2	89253.3	86160.6	33750.7	28964.8	48269.3	39793.7	31318.9	26457.4	44498.9	44841.5	37726.8	46296.7	60145.4	45830.2
116.9304583_982.1313672__[M+Cl]- 81.9587_21	21654.3	26818.6	20740.5	20415.4	26783.5	21971.3	20362.4	20545.7	20520.4	22240.3	20253.8	19589.9	31420	32271.7	27931.1	29845.2	29891.4	26249	25878.6	25770.9	23307.9	25236.4	27625.1	28777	23372	20090.5	22475.5	23298.8	18322.5	16073.6	22299.7	22211.6	20023.4	25128.6	42351.1	28910.9
[truncated: 14,389 more rows]

[truncated: 1 more sheets: G+T+U-Albedo neg]
