# Supplementary material for: Developmental Stage- and Genotype-Dependent Regulation of Specialized Metabolite Accumulation in Fruit Tissues of Different Citrus Varieties
Source: Int J Mol Sci. 2019 Mar 12;20(5):1245. doi: 10.3390/ijms20051245 (PMC6429498; doi:10.3390/ijms20051245)
Supplement: Supplementary file 1 [file ijms-20-01245-s001.zip › Tables S7 and S8.xlsx]

## Sheet: Supplementary Table S7 and S8
Supplementary Table S7. Statistical values of specialized metabolites showing significantly different profiles genotype- and developmental stage-wise in fruit pulp (Corresponding to Figure 6)
	p-value	R-squared	p.valor_beta0	p.valor_MandarinvsGrapefruit	p.valor_OrangevsGrapefruit	p.valor_Time	p.valor_TimexMandarin	p.valor_TimexOrange	p.valor_Time2	p.valor_Time2xMandarin	p.valor_Time2xOrange
C1	1.46229e-14	0.94058	7.6999e-15	2.65137e-11	1.90927e-06	3.65964e-12	3.34453e-08	0.000346846	3.99081e-10	1.81563e-06	0.00316212
C2	1.06469e-17	0.932661	1.96941e-10	2.67198e-13	4.30482e-13	NA	0.00150191	NA	0.0229363	NA	NA
C3	1.4691e-15	0.92026	NA	1.0051e-11	0.000112441	0.0083828	4.16579e-06	0.0288011	NA	NA	NA
C4	1.09519e-16	0.951349	NA	1.04855e-13	1.13655e-09	0.012528	3.74355e-10	8.71934e-08	NA	6.83635e-08	6.50299e-07
C6	1.00513e-16	0.951649	NA	6.37441e-14	4.00687e-07	0.0151547	5.16265e-10	6.38697e-06	NA	1.34966e-07	3.37439e-05
C7	1.87499e-13	0.853768	1.56739e-11	NA	NA	NA	1.03325e-08	NA	1.97692e-09	2.68443e-06	NA
C8	1.99303e-19	0.969094	1.8278e-19	NA	4.78351e-10	6.27228e-17	0.00162503	1.90688e-08	6.09305e-14	0.00977102	3.66524e-07
C9	3.012e-15	0.947219	2.30911e-05	3.54581e-09	1.64761e-08	0.0250044	0.000230492	0.000635363	0.0435449	0.00699439	0.0156228
C13	7.24793e-17	0.944433	0.0126224	NA	3.0357e-11	0.00533025	4.90098e-06	1.56496e-06	0.0025855	0.000635994	NA
C14	4.83978e-07	0.665345	1.53484e-05	NA	NA	0.000227215	0.000108936	6.64008e-06	0.000168758	NA	NA
C15	1.91128e-16	0.957061	7.32192e-07	4.07251e-07	0.000954481	9.07732e-12	2.14059e-11	5.14265e-09	1.52422e-12	6.48521e-12	1.62794e-09
C17	2.13053e-18	0.969306	4.20068e-17	8.03111e-11	1.96794e-12	1.3758e-13	8.66327e-08	2.05142e-10	1.9026e-10	3.24114e-06	5.87849e-09
C19	2.00613e-24	0.989064	1.75156e-20	1.63482e-11	1.3766e-15	1.96632e-15	9.07319e-06	2.93932e-10	1.84646e-12	6.62412e-05	4.75775e-09
C22	1.40803e-16	0.95046	1.0184e-12	NA	0.0145727	4.31377e-16	2.37061e-10	0.000149431	3.42288e-16	9.10428e-08	0.000551561
C23	1.21962e-11	0.853446	7.59671e-09	NA	0.0289496	NA	0.00619688	0.00539744	1.4525e-05	NA	0.0450352
C24	1.46869e-10	0.803768	3.96939e-08	NA	NA	6.33115e-09	2.8115e-08	2.20752e-08	2.12674e-07	NA	NA
C25	2.71285e-10	0.795721	8.28772e-09	NA	NA	1.28659e-11	NA	0.0310583	NA	2.48195e-09	0.000193373
C26	1.46972e-18	0.957608	3.71559e-11	5.55447e-12	NA	4.71907e-17	NA	5.68411e-08	1.92806e-17	0.00576984	0.000207854
C28	2.81783e-15	0.938509	NA	6.99188e-05	0.0155017	5.70927e-05	2.27538e-09	0.00844708	2.07887e-06	NA	0.00660614
C29	1.47138e-09	0.771761	NA	1.1972e-07	0.00854086	NA	NA	NA	0.000586802	0.011333	NA
C30	1.0893e-13	0.907501	1.43384e-07	NA	NA	0.000389919	1.0913e-11	7.41285e-07	0.00114802	2.05723e-09	7.0293e-06
C31	1.27616e-08	0.764649	7.66725e-08	0.00798112	NA	6.70725e-09	0.000106229	NA	3.54617e-08	NA	2.75206e-05
C32	1.215e-11	0.901373	NA	0.0213166	0.014048	0.000990763	0.00657822	0.00477255	3.42455e-05	0.0081572	0.0111368
NA=not computable
Supplementary Table S8. Statistical values of specialized metabolites showing significantly different profiles genotype- and developmental stage-wise in fruit albedo (Corresponding to Figure 7)
	p-value	R-squared	p.valor_beta0	p.valor_MandarinvsGrapefruit	p.valor_OrangevsGrapefruit	p.valor_Time	p.valor_TimexMandarin	p.valor_TimexOrange	p.valor_Time2	p.valor_Time2xMandarin	p.valor_Time2xOrange
C1	2.62057e-30	0.995997	3.54697e-27	9.07992e-24	2.14254e-24	3.16715e-21	8.7207e-17	1.40556e-17	3.45253e-17	5.57809e-13	6.2575e-14
C2	7.28412e-25	0.980999	0.000150797	4.47758e-27	NA	6.26712e-06	NA	4.16488e-16	4.53428e-06	NA	3.27415e-11
C3	2.6862e-18	0.947766	0.028556	1.27819e-20	NA	0.0287087	NA	2.3279e-06	0.0331015	NA	0.000278322
C6	1.40435e-10	0.827013	NA	8.90251e-08	0.000368131	0.000750875	0.0203915	NA	0.00140692	NA	NA
C7	1.65237e-07	0.74698	2.77289e-05	1.08559e-05	5.02057e-05	1.31702e-06	NA	6.74414e-06	1.32224e-06	NA	3.23212e-06
C8	2.43426e-15	0.948054	3.27515e-13	0.00470389	1.62716e-10	1.38415e-11	0.000704709	8.22398e-08	4.23284e-10	0.00108121	1.03118e-06
C12	2.57946e-09	0.763186	0.000130739	4.86824e-10	NA	NA	NA	NA	0.00165038	1.08545e-06	0.0029995
C14	2.93617e-12	0.826167	0.000364843	NA	NA	0.00900485	8.22049e-13	NA	0.0100143	NA	NA
C15	3.30233e-08	0.798005	0.0169582	0.0302208	NA	4.08225e-05	0.000487363	8.96615e-07	5.01137e-05	0.000783505	0.000105365
C17	1.25655e-15	0.950565	7.20955e-14	1.96335e-08	4.06557e-11	2.14527e-10	0.000209614	4.61765e-07	7.45885e-09	0.0016371	8.86554e-06
C18	3.40317e-21	0.96658	3.88465e-16	1.35011e-07	NA	3.74063e-14	0.000244006	2.07834e-07	NA	3.90364e-05	NA
C19	1.0052e-17	0.959034	4.83466e-13	2.50253e-09	6.08e-09	5.09051e-08	0.0220432	0.0070461	2.34059e-06	NA	0.0337916
C22	5.88243e-07	0.722671	0.0185312	0.023091	NA	0.000706064	0.0346481	0.000303063	0.00039111	0.0235732	NA
C23	1.69243e-15	0.930819	0.0427698	NA	NA	5.87668e-05	0.0132328	0.0397675	1.79812e-05	9.19276e-05	0.000697678
C25	5.61885e-21	0.96544	5.05893e-13	NA	NA	NA	0.000113138	0.000133184	1.1655e-21	9.48652e-11	2.78089e-10
C26	4.04438e-08	0.771313	NA	0.00129031	NA	0.00298149	0.00192251	3.51822e-05	0.00143125	0.00120141	NA
C28	1.97148e-14	0.939232	5.75612e-05	0.000944445	0.00316618	9.44636e-09	3.84972e-05	0.000161835	2.38976e-11	1.49497e-06	4.73561e-06
C30	1.87832e-17	0.949409	1.22403e-07	NA	0.000648308	2.61248e-05	1.7195e-16	0.00767348	2.98073e-05	1.06284e-14	NA
C31	3.90559e-13	0.898863	1.58907e-07	NA	0.0344784	6.9728e-08	6.1258e-06	2.86989e-07	1.0552e-05	2.52227e-08	NA
C32	2.28997e-19	0.93773	0.000882413	NA	NA	4.74355e-10	NA	NA	1.06439e-13	NA	0.0133812
NA=not computable
